# Supplementary material
Source: HighWire-hosted journal article supplement (doi:10.1101/rna.072850.119)
Supplement: Supplemental_Data_1.xlsx [file Supplemental_Data_1.xlsx]

## Sheet: D0
D0 Index of Data Tables
Table	Contents
D0	Index of Data Tables
D1	Shoot Control vs. Shoot Salt Intra-Tissue Contrast Derived Statistics, Whole Transcript
D2	Shoot Control vs. Shoot Salt Intra-Tissue Contrast Derived Statistics, 5’UTR
D3	Shoot Control vs. Shoot Salt Intra-Tissue Contrast Derived Statistics, CDS
D4	Shoot Control vs. Shoot Salt Intra-Tissue Contrast Derived Statistics, 3’UTR
D5	Root Control vs. Root Salt Intra-Tissue Contrast Derived Statistics, Whole Transcript
D6	Root Control vs. Root Salt Intra-Tissue Contrast Derived Statistics, 5’UTR
D7	Root Control vs. Root Salt Intra-Tissue Contrast Derived Statistics, CDS
D8	Root Control vs. Root Salt Intra-Tissue Contrast Derived Statistics, 3’UTR
D9	Shoot Control vs. Root Control Inter-Tissue Contrast Derived Statistics, Whole Transcript
D10	Shoot Control vs. Root Control Inter-Tissue Contrast Derived Statistics, 5’UTR
D11	Shoot Control vs. Root Control Inter-Tissue Contrast Derived Statistics, CDS
D12	Shoot Control vs. Root Control Inter-Tissue Contrast Derived Statistics, 3’UTR
D13	Shoot Salt vs. Root Salt Inter-Tissue Contrast Derived Statistics, Whole Transcript
D14	Shoot Salt vs. Root Salt Inter-Tissue Contrast Derived Statistics, 5’UTR
D15	Shoot Salt vs. Root Salt Inter-Tissue Contrast Derived Statistics, CDS
D16	Shoot Salt vs. Root Salt Inter-Tissue Contrast Derived Statistics, 3’UTR
D17	Combined ANOVA, Whole Transcript
D18	Combined ANOVA, 5’UTR
D19	Combined ANOVA, CDS
D20	Combined ANOVA, 3’UTR
D21	Shoot Control TPM
D22	Shoot Salt TPM
D23	Root Control TPM
D24	Root Salt TPM

## Sheet: D1
D1 Shoot Control vs. Shoot Salt Intra-Tissue Contrast Derived Statistics, Whole Transcript
transcript	shoot_control_max	shoot_control_average	shoot_control_std	shoot_control_gini	shoot_salt_max	shoot_salt_average	shoot_salt_std	shoot_salt_gini
AT2G14880.1	1.503	0.306582	0.362374	0.625124	1.8	0.310981	0.400205	0.659685
AT3G19760.1	1.569	0.319189	0.354007	0.594711	1.842	0.307995	0.364635	0.622861
AT1G62780.1	1.591	0.331869	0.35786	0.581232	1.373	0.335568	0.343624	0.562291
AT2G12280.1	1.563	0.180641	0.358073	0.816446	1.53	0.159804	0.321463	0.818759
AT1G68050.1	1.758	0.294148	0.365893	0.639968	2.043	0.314469	0.43491	0.68764
AT2G22190.1	1.456	0.241191	0.37126	0.731592	1.529	0.226852	0.343316	0.721966
AT5G62000.3	1.778	0.337303	0.356859	0.572857	1.638	0.333293	0.371066	0.59812
AT1G08650.2	1.686	0.240697	0.372863	0.733879	1.118	0.17986	0.253429	0.698731
AT3G11130.1	2.035	0.295027	0.368841	0.643905	1.852	0.286355	0.363795	0.652106
AT3G09860.1	1.682	0.357205	0.366357	0.557163	1.847	0.387346	0.410802	0.573498
AT1G04440.1	1.847	0.260509	0.372312	0.701859	1.942	0.250771	0.374299	0.716552
AT5G13090.1	2.642	0.203155	0.38197	0.793995	3.049	0.235301	0.480711	0.819463
AT4G30810.1	1.811	0.279927	0.378634	0.676997	1.584	0.252523	0.352491	0.692192
AT4G32560.1	1.587	0.288002	0.372679	0.663314	1.761	0.280482	0.384466	0.685519
AT3G10680.1	1.597	0.298554	0.368773	0.641454	1.502	0.310016	0.389579	0.650211
AT3G60530.1	1.728	0.260287	0.363472	0.692783	1.594	0.257681	0.34766	0.677671
AT1G31730.1	1.751	0.272055	0.365643	0.674814	1.895	0.269752	0.359757	0.672564
AT5G19540.1	1.537	0.307248	0.366386	0.627136	1.682	0.304282	0.37083	0.637075
AT1G11750.1	1.762	0.298213	0.354792	0.622093	1.744	0.325102	0.382538	0.622113
AT3G11500.1	1.542	0.304862	0.362793	0.625822	1.501	0.295744	0.385597	0.666463
AT5G52780.1	1.466	0.321073	0.359699	0.599131	1.578	0.34115	0.397022	0.61747
AT5G50020.2	1.996	0.276487	0.368974	0.674255	1.674	0.264876	0.357522	0.678987
AT1G72370.2	1.66	0.396855	0.348748	0.491541	1.602	0.391314	0.380895	0.536913
AT1G72370.1	1.644	0.408859	0.34033	0.467402	1.588	0.403042	0.379817	0.522835
AT1G18490.1	1.763	0.193388	0.369954	0.805008	1.88	0.18929	0.357273	0.799447
AT5G19550.1	1.443	0.265618	0.360069	0.681272	1.53	0.244893	0.328733	0.675414
AT3G19930.1	1.791	0.249405	0.368197	0.713768	2.158	0.271741	0.419808	0.729585
AT4G23740.1	1.777	0.234366	0.367366	0.735981	2.099	0.234141	0.357878	0.722391
AT1G67750.1	2.156	0.212768	0.381745	0.780027	1.574	0.197746	0.307668	0.731298
AT3G23900.1	1.99	0.270478	0.367554	0.678064	2.22	0.285338	0.405743	0.696876
AT1G73940.1	1.331	0.295113	0.373445	0.655419	1.783	0.292567	0.410327	0.696333
AT5G47540.1	1.883	0.263053	0.374881	0.696872	1.842	0.257568	0.365554	0.69651
AT2G02370.2	2.662	0.178537	0.401899	0.846244	2.344	0.200154	0.42175	0.828813
AT2G02370.1	2.659	0.176884	0.397378	0.845508	2.327	0.196274	0.413105	0.828006
AT1G55530.1	1.897	0.238073	0.374754	0.738853	1.35	0.220469	0.315131	0.701579
AT2G43210.1	2.064	0.264954	0.378889	0.697376	2.027	0.269021	0.365962	0.679187
AT1G52720.1	1.753	0.258406	0.376122	0.708229	1.852	0.245107	0.391375	0.746123
AT3G09720.1	1.895	0.228474	0.382137	0.755275	2.138	0.203735	0.356503	0.771202
AT1G56000.1	1.961	0.26398	0.377129	0.698519	1.585	0.246321	0.36148	0.711268
AT5G22070.1	1.861	0.235512	0.3797	0.746947	1.742	0.217884	0.355209	0.748895
AT1G17080.1	1.369	0.313331	0.362984	0.614847	1.681	0.296238	0.364121	0.637957
AT1G74670.1	1.446	0.255382	0.354646	0.689981	1.453	0.261809	0.343097	0.66883
AT4G23760.1	1.948	0.249136	0.406463	0.74693	1.967	0.257396	0.406718	0.736857
AT3G59940.1	1.491	0.34884	0.362143	0.565899	1.645	0.312923	0.350311	0.599135
AT5G61412.1	1.407	0.25354	0.350809	0.681685	1.32	0.238274	0.321654	0.678595
AT1G24490.2	1.881	0.280843	0.375292	0.673014	1.683	0.266847	0.362794	0.680517
AT5G08120.1	1.616	0.275182	0.364201	0.669601	1.887	0.272451	0.370728	0.679874
AT3G49670.1	1.887	0.254546	0.37974	0.714751	2.467	0.254998	0.443546	0.76986
AT3G54110.1	1.967	0.312705	0.372181	0.620694	1.592	0.310769	0.395543	0.656067
AT4G24760.1	1.713	0.251384	0.375782	0.716985	1.457	0.222642	0.321258	0.700686
AT1G22360.1	1.752	0.31483	0.361109	0.609353	1.775	0.339017	0.411857	0.636575
AT1G22360.2	1.773	0.295205	0.359612	0.635218	1.786	0.324402	0.410483	0.65348
AT4G37190.1	1.966	0.250568	0.381969	0.722937	2.155	0.234179	0.389611	0.755425
AT5G22050.2	2.101	0.258306	0.376126	0.706857	2.167	0.269161	0.442357	0.753004
AT5G22050.1	2.129	0.241322	0.376553	0.733742	2.174	0.254175	0.445216	0.7761
AT4G37190.2	1.956	0.249664	0.379617	0.721473	2.108	0.235152	0.387018	0.751718
AT3G54130.1	1.9	0.226788	0.377182	0.7554	1.371	0.18404	0.302057	0.753918
AT5G49460.1	1.942	0.244839	0.382062	0.732434	1.876	0.241053	0.409844	0.765475
AT3G47965.1	1.794	0.237912	0.381774	0.74415	1.678	0.218903	0.340266	0.727856
AT3G13120.1	1.464	0.370208	0.348254	0.519841	2.037	0.416526	0.423325	0.556846
AT2G26190.1	1.869	0.323256	0.36506	0.599018	2.431	0.376858	0.485515	0.658348
AT4G32330.3	1.502	0.337043	0.359042	0.578592	1.638	0.374129	0.399818	0.580391
AT1G74920.2	1.69	0.309647	0.354056	0.603695	1.71	0.30872	0.353639	0.60764
AT4G32330.1	1.555	0.320838	0.359611	0.600485	1.623	0.336002	0.392455	0.620048
AT4G24275.1	2.106	0.279881	0.382061	0.678049	1.739	0.320964	0.439723	0.683456
AT1G75800.1	1.747	0.323659	0.357465	0.590964	2.045	0.362422	0.417487	0.613488
AT4G14230.1	1.771	0.301842	0.366036	0.630065	1.903	0.350988	0.439379	0.648499
AT3G26115.1	2.197	0.219232	0.378134	0.76331	2.972	0.230609	0.478454	0.825306
AT2G03680.1	1.65	0.337159	0.372487	0.59158	2.231	0.326921	0.391141	0.623365
AT1G44780.1	1.863	0.309728	0.369191	0.625401	1.828	0.3214	0.388211	0.631032
AT2G20020.1	1.626	0.302281	0.356996	0.62228	1.575	0.292798	0.345454	0.623695
AT5G15700.2	1.709	0.239733	0.377107	0.737423	1.935	0.227828	0.368848	0.748409
AT1G33060.2	2.031	0.203785	0.372168	0.790061	2.163	0.212021	0.399553	0.798682
AT2G18050.1	1.57	0.283374	0.360118	0.65429	0.941	0.204148	0.224404	0.591859
AT2G18050.2	1.538	0.277142	0.358549	0.662673	0.934	0.204236	0.227204	0.597634
AT1G75750.1	1.372	0.306488	0.347825	0.604674	1.456	0.270397	0.31714	0.619981
AT1G75750.2	1.396	0.288209	0.354037	0.641171	1.46	0.249266	0.312016	0.648217
AT3G22150.1	2.072	0.265593	0.38104	0.699312	2.336	0.269443	0.412052	0.723799
AT4G17530.1	1.435	0.286185	0.357373	0.6457	1.356	0.252227	0.32027	0.654732
AT2G01590.1	1.982	0.277441	0.38917	0.683477	1.891	0.291778	0.412832	0.695685
AT1G79245.1	1.879	0.293898	0.363845	0.643582	2.112	0.318481	0.45902	0.704547
AT1G66660.2	2.348	0.253545	0.388856	0.720169	2.249	0.231565	0.360263	0.727281
AT1G14740.1	1.886	0.320545	0.371345	0.610558	2.297	0.336618	0.43075	0.657389
AT5G42150.1	1.712	0.246823	0.373001	0.724173	1.425	0.240213	0.349447	0.709016
AT2G34200.1	2.039	0.303692	0.377268	0.63959	1.37	0.286687	0.356812	0.647131
AT2G33120.2	1.799	0.268578	0.372602	0.68966	1.582	0.242252	0.344481	0.70101
AT2G33120.3	1.66	0.247562	0.367958	0.718227	1.723	0.219703	0.349263	0.741647
AT2G33120.1	1.778	0.273931	0.369188	0.677881	1.563	0.252989	0.339154	0.676554
AT3G53270.3	1.705	0.209577	0.367009	0.777413	2.051	0.212832	0.387533	0.787187
AT1G54210.1	1.721	0.240962	0.386455	0.741869	1.956	0.230355	0.368291	0.73779
AT1G54210.2	1.68	0.211244	0.378576	0.784258	1.84	0.192626	0.351273	0.788475
AT5G41970.1	1.665	0.280997	0.365463	0.66346	1.644	0.273421	0.367139	0.676191
AT4G22240.1	1.57	0.285581	0.363778	0.655388	1.19	0.224445	0.270739	0.6318
AT4G17560.1	1.767	0.351505	0.365369	0.566106	1.579	0.355407	0.402988	0.607017
AT1G18150.2	1.626	0.235013	0.362204	0.729366	2.326	0.242458	0.403738	0.757278
AT5G59000.1	1.767	0.202477	0.363256	0.78466	1.548	0.217428	0.360876	0.760936
AT3G22970.2	1.921	0.232183	0.371984	0.740983	2.058	0.222454	0.359469	0.744587
AT5G58510.1	2.822	0.23146	0.387471	0.753768	1.986	0.203372	0.352564	0.767735
AT1G06850.2	1.828	0.198037	0.373216	0.796484	1.803	0.194277	0.365185	0.795699
AT2G03550.1	2.04	0.287941	0.377829	0.667065	1.874	0.289518	0.382635	0.66515
AT5G01650.1	1.361	0.317018	0.357569	0.604043	1.741	0.308385	0.397586	0.659784
AT3G13120.2	1.483	0.342114	0.354025	0.561867	2.069	0.386386	0.435009	0.602519
AT4G22250.1	1.64	0.234595	0.36455	0.73069	1.479	0.243899	0.345401	0.696844
AT5G65960.1	1.757	0.312627	0.373422	0.628587	1.564	0.292597	0.345344	0.62113
AT2G35840.3	1.763	0.228109	0.365377	0.744157	1.502	0.201057	0.304198	0.723248
AT2G35840.2	1.631	0.283477	0.366444	0.660153	1.362	0.249846	0.298394	0.627943
AT2G35840.1	1.611	0.289143	0.364781	0.649855	1.346	0.258174	0.296398	0.610497
AT2G33810.1	1.855	0.248235	0.377277	0.723399	2.55	0.257046	0.42384	0.752935
AT5G36290.1	1.718	0.245024	0.369662	0.721861	1.957	0.264371	0.396792	0.715331
AT5G36290.2	1.671	0.24841	0.366443	0.714171	1.898	0.25391	0.390859	0.725311
AT4G30260.1	1.712	0.264265	0.372822	0.696027	1.535	0.260583	0.337364	0.660366
AT4G16180.2	1.912	0.27219	0.373451	0.684658	1.939	0.261918	0.360076	0.686281
AT4G16180.1	1.51	0.200261	0.36585	0.79132	1.422	0.188181	0.343025	0.791611
AT4G38740.1	1.375	0.369524	0.356133	0.53425	2.191	0.366304	0.392861	0.577636
AT3G20410.1	1.609	0.299423	0.362359	0.63295	1.604	0.33578	0.408083	0.636329
AT2G36000.1	1.844	0.308733	0.361999	0.613458	1.99	0.338288	0.423255	0.645188
AT5G37510.1	1.768	0.295831	0.359944	0.635273	1.549	0.28327	0.353084	0.645934
AT5G37510.2	1.756	0.290526	0.359405	0.64258	1.541	0.279875	0.3516	0.64939
AT1G51110.1	1.988	0.314878	0.371629	0.617371	2.291	0.337472	0.431166	0.656491
AT5G65940.2	1.871	0.308582	0.371362	0.630054	1.616	0.296379	0.373083	0.65153
AT5G65940.3	1.818	0.300892	0.369546	0.640544	1.573	0.281652	0.361385	0.658386
AT1G17680.1	1.941	0.24789	0.375168	0.72132	1.938	0.236086	0.366315	0.731734
AT5G59410.1	1.612	0.222086	0.360362	0.746637	1.643	0.227306	0.375226	0.753695
AT3G20780.1	2.131	0.252864	0.380261	0.715589	1.977	0.245142	0.364379	0.716223
AT1G21160.1	1.892	0.267903	0.364603	0.679924	1.648	0.24723	0.340236	0.684554
AT5G55960.1	1.775	0.265383	0.378813	0.698836	2.411	0.248245	0.390893	0.737792
AT5G22875.1	1.508	0.240478	0.373845	0.733933	2.221	0.285324	0.44413	0.729617
AT1G05150.1	1.702	0.256896	0.370247	0.705396	2.031	0.269241	0.397268	0.712531
AT5G04440.1	1.878	0.291439	0.364949	0.641981	1.826	0.308826	0.418161	0.679319
AT3G47060.1	1.909	0.276924	0.37988	0.681657	1.674	0.253101	0.348058	0.685748
AT1G65440.1	1.791	0.331607	0.358587	0.580784	1.677	0.318196	0.342019	0.580807
AT3G63500.1	1.976	0.308076	0.367508	0.625623	2.01	0.306029	0.382984	0.64655
AT5G04420.2	1.94	0.249598	0.3737	0.717649	1.871	0.230539	0.339287	0.712557
AT5G04420.3	2.006	0.231815	0.373256	0.745026	1.928	0.215411	0.33762	0.73614
AT5G04420.1	1.963	0.242784	0.371737	0.725788	1.898	0.223043	0.339245	0.725246
AT3G63500.2	1.954	0.314559	0.369179	0.617479	2.008	0.312263	0.386161	0.641231
AT3G46000.1	1.827	0.303167	0.376613	0.639619	1.763	0.321339	0.426365	0.672261
AT1G19310.1	1.91	0.249114	0.385517	0.73018	2.616	0.221517	0.368363	0.751856
AT4G31990.3	1.65	0.309739	0.363175	0.617919	1.382	0.2871	0.326318	0.604826
AT2G38980.1	3.079	0.156668	0.417719	0.884013	2.531	0.15194	0.395492	0.88139
AT4G31990.1	1.596	0.309123	0.357313	0.611519	1.349	0.287196	0.328598	0.608875
AT4G32400.1	1.986	0.285692	0.378582	0.666205	1.93	0.278777	0.38843	0.689644
AT3G13460.1	1.726	0.333322	0.358142	0.57849	1.981	0.35207	0.401971	0.60868
AT3G17120.1	1.885	0.219298	0.375104	0.765496	1.455	0.194329	0.308923	0.743902
AT4G01040.1	1.544	0.266519	0.364473	0.683828	1.437	0.242493	0.34551	0.701678
AT4G24830.1	1.7	0.270421	0.362447	0.674749	2.017	0.27313	0.399988	0.709906
AT3G13460.2	1.739	0.328623	0.359175	0.58606	1.99	0.350328	0.403398	0.612366
AT5G42390.1	1.659	0.312601	0.360554	0.612319	1.786	0.314639	0.378502	0.629614
AT1G60260.1	1.616	0.259484	0.369574	0.698483	1.65	0.248158	0.352191	0.697033
AT1G59840.2	1.858	0.234186	0.370629	0.73732	1.871	0.239863	0.381964	0.742604
AT4G04470.1	1.648	0.239076	0.361593	0.72421	1.77	0.244274	0.350226	0.70155
AT3G07790.1	1.554	0.295969	0.357801	0.630665	1.799	0.285128	0.359066	0.647766
AT1G59840.1	1.678	0.250889	0.366144	0.70817	1.876	0.284166	0.413091	0.708257
AT5G46680.1	1.696	0.194593	0.369886	0.800469	1.702	0.191978	0.351811	0.790859
AT1G17455.2	2.193	0.201902	0.373948	0.793872	2.678	0.20529	0.433832	0.829606
AT1G17455.1	2.034	0.224125	0.375671	0.760376	2.619	0.237916	0.455001	0.800795
AT3G18960.1	1.832	0.256201	0.374256	0.70754	1.857	0.248454	0.396402	0.742505
AT3G48200.1	1.779	0.259999	0.371503	0.700125	1.637	0.241979	0.336057	0.690013
AT1G11260.1	1.637	0.355042	0.349254	0.540568	2.463	0.46795	0.543592	0.615187
AT1G64750.2	2.071	0.312283	0.368146	0.616105	1.614	0.299248	0.359331	0.628351
AT1G64750.3	2.119	0.231204	0.382227	0.755323	1.721	0.225136	0.357974	0.741708
AT3G25530.1	1.443	0.338615	0.363482	0.582992	1.618	0.337222	0.386256	0.611367
AT1G64750.1	1.987	0.334694	0.376588	0.595784	1.535	0.332089	0.353275	0.575109
AT3G01480.1	1.585	0.357	0.360925	0.554972	2.11	0.408666	0.449366	0.592692
AT2G42190.1	1.341	0.344604	0.361712	0.57287	2.091	0.356316	0.367809	0.560831
AT3G01480.2	1.627	0.332394	0.364918	0.590865	2.156	0.376332	0.450927	0.630438
AT3G09440.1	1.651	0.304085	0.36702	0.63176	1.324	0.255974	0.302347	0.623073
AT5G49660.1	1.93	0.226739	0.380278	0.757249	1.967	0.222222	0.369805	0.753775
AT3G09440.2	1.641	0.309985	0.366463	0.622701	1.317	0.26103	0.301657	0.613389
AT5G16680.1	1.716	0.274041	0.370693	0.678677	1.765	0.265826	0.359165	0.677344
AT2G34300.2	2.285	0.282373	0.375798	0.667845	1.858	0.257519	0.321631	0.643829
AT2G34300.1	2.305	0.279618	0.375455	0.671089	1.872	0.25591	0.32114	0.645484
AT1G69840.7	1.575	0.302876	0.366559	0.634226	2.071	0.343289	0.507295	0.716651
AT3G25150.1	1.523	0.305472	0.363291	0.626182	1.762	0.290329	0.367163	0.651685
AT1G21580.1	2.349	0.253282	0.375892	0.714664	2.619	0.256694	0.411337	0.738544
AT3G02790.1	1.302	0.275313	0.364591	0.67492	1.456	0.271422	0.349968	0.657519
AT4G24900.1	2.226	0.216707	0.391721	0.780486	2.172	0.221328	0.3743	0.760198
AT1G48650.1	2.275	0.262177	0.37013	0.692067	2.069	0.260796	0.369503	0.695711
AT4G14920.1	2	0.248316	0.379253	0.72544	2.226	0.237	0.358647	0.720829
AT1G48650.2	1.934	0.259848	0.370824	0.697164	2.138	0.25318	0.368257	0.704998
AT5G49510.1	1.548	0.269561	0.370323	0.685412	1.812	0.236577	0.35035	0.712746
AT2G22450.1	1.566	0.308449	0.360786	0.617735	1.828	0.320751	0.381946	0.626272
AT5G49510.2	1.587	0.237843	0.370088	0.734044	1.879	0.217751	0.359012	0.753049
AT5G51750.1	1.945	0.27798	0.367013	0.669475	1.931	0.28359	0.390904	0.685214
AT5G58100.1	1.89	0.262414	0.374951	0.699058	2.329	0.262063	0.390124	0.712869
AT2G18960.1	1.48	0.336036	0.35551	0.575159	1.54	0.325114	0.335846	0.565407
AT1G16260.2	1.968	0.26699	0.373256	0.690419	2.176	0.27867	0.440691	0.738573
AT5G02500.1	2.006	0.338712	0.35494	0.564419	1.643	0.325895	0.344852	0.573126
AT1G56460.2	1.869	0.292392	0.371314	0.654076	1.807	0.295837	0.375803	0.653777
AT1G01770.1	1.82	0.243441	0.383946	0.73598	1.846	0.210973	0.360932	0.764619
AT5G25100.1	1.673	0.274364	0.370059	0.678676	1.609	0.257322	0.350604	0.682199
AT5G25100.2	1.701	0.260816	0.370842	0.700427	1.637	0.243794	0.350447	0.703847
AT3G19360.1	1.809	0.221517	0.380894	0.768415	2.006	0.236598	0.427542	0.786423
AT2G36060.1	1.727	0.249673	0.375957	0.723401	1.624	0.252434	0.374354	0.714594
AT2G36060.2	1.744	0.248511	0.374315	0.723255	1.634	0.251228	0.379755	0.722093
AT2G36060.3	1.819	0.242559	0.37572	0.732694	1.677	0.255043	0.380603	0.716497
AT1G72170.1	1.653	0.278038	0.380949	0.683886	1.547	0.268719	0.38078	0.694369
AT3G24530.1	1.602	0.259906	0.365592	0.693156	1.839	0.266099	0.3876	0.704834
AT1G07930.1	2.042	0.370103	0.364226	0.537201	1.509	0.375477	0.373668	0.55093
AT1G47250.1	1.769	0.303996	0.370822	0.635052	1.586	0.288546	0.337354	0.619178
AT1G07930.2	2.09	0.358533	0.37386	0.561836	1.586	0.361004	0.378956	0.574824
AT4G09030.1	1.398	0.269034	0.358395	0.673304	1.874	0.257086	0.349947	0.676453
AT5G57200.1	7	0.182863	1.0998	0.973788	7	0.192464	1.14464	0.972505
AT3G51370.2	1.794	0.268549	0.362464	0.677367	1.453	0.244171	0.331145	0.680447
AT3G51370.1	1.799	0.27933	0.361413	0.659263	1.466	0.260605	0.333565	0.655853
AT4G08850.2	1.902	0.276631	0.371271	0.673737	2.158	0.298212	0.417389	0.691357
AT4G08850.1	1.852	0.289336	0.36665	0.649689	2.112	0.311551	0.413177	0.669113
AT4G32010.1	2.072	0.228316	0.376912	0.752062	1.878	0.210796	0.356921	0.762486
AT1G21630.2	1.849	0.263417	0.369953	0.69343	2.3	0.255598	0.363859	0.697164
AT1G73030.1	1.394	0.319174	0.346833	0.585536	1.575	0.303332	0.353767	0.617584
AT1G21630.1	1.819	0.272256	0.369198	0.679576	2.257	0.264357	0.361879	0.681489
AT4G19060.1	1.794	0.265657	0.367799	0.687201	1.699	0.263292	0.338271	0.654518
AT3G25840.2	1.803	0.323229	0.361012	0.594521	1.596	0.315074	0.361003	0.609838
AT3G25840.1	1.79	0.330971	0.361531	0.585708	1.603	0.321697	0.362888	0.60343
AT1G27030.1	1.569	0.27645	0.368165	0.672957	2.537	0.306308	0.446052	0.702265
AT2G20950.3	1.926	0.274704	0.373933	0.679787	1.95	0.281296	0.371028	0.669722
AT2G20950.2	1.905	0.267507	0.372955	0.690062	1.932	0.280026	0.368913	0.668725
AT2G20950.1	1.833	0.276226	0.369631	0.673818	1.853	0.288003	0.362161	0.649397
AT3G06450.2	2.397	0.24244	0.376127	0.727028	2.081	0.22865	0.346183	0.719777
AT3G25150.2	1.555	0.277248	0.36667	0.671589	1.797	0.266157	0.369166	0.691068
AT3G02950.1	1.59	0.312572	0.363612	0.616793	1.734	0.311431	0.360724	0.614206
AT2G21060.1	1.527	0.398098	0.353591	0.496805	1.516	0.388038	0.408879	0.575855
AT5G46920.1	2.235	0.201999	0.390922	0.804059	2.423	0.200188	0.377465	0.79488
AT3G07730.1	1.81	0.240581	0.381313	0.737571	1.239	0.210725	0.301107	0.702673
AT1G33700.2	2.827	0.167152	0.401488	0.86154	2.33	0.180373	0.399316	0.842761
AT3G55500.1	1.8	0.285992	0.382475	0.671883	1.488	0.243143	0.350984	0.703083
AT1G76160.1	1.678	0.328104	0.356139	0.583039	1.931	0.350897	0.388949	0.594655
AT4G19520.1	2.351	0.205439	0.376796	0.788662	2.518	0.209763	0.391738	0.792372
AT4G21190.1	1.857	0.315994	0.374644	0.624921	1.787	0.328344	0.380737	0.612818
AT5G62900.1	1.689	0.27312	0.369514	0.681428	1.653	0.292424	0.383266	0.667212
AT1G58030.1	1.806	0.271433	0.37313	0.682285	1.952	0.24927	0.368823	0.712009
AT4G19990.1	2.189	0.225543	0.380213	0.758398	1.677	0.208957	0.349287	0.756873
AT5G11990.1	1.535	0.24502	0.366583	0.717899	1.706	0.255596	0.40587	0.738791
AT4G19990.2	2.135	0.227823	0.374893	0.750445	1.651	0.209088	0.34672	0.754589
AT3G27100.1	1.817	0.260972	0.37612	0.700615	1.763	0.264845	0.407644	0.731258
AT3G27100.2	1.918	0.225773	0.379198	0.758873	1.86	0.224593	0.400747	0.782524
AT1G51450.1	1.931	0.251295	0.383664	0.723358	1.441	0.225401	0.340053	0.722517
AT1G29470.1	1.615	0.351744	0.352089	0.547628	1.547	0.357429	0.364782	0.561099
AT5G03420.1	1.637	0.268064	0.36537	0.683331	1.631	0.283161	0.376397	0.673879
AT1G19880.1	1.915	0.295472	0.36593	0.638497	1.773	0.289826	0.376817	0.663679
AT1G64500.1	1.693	0.276198	0.367347	0.671595	1.448	0.230458	0.290491	0.647276
AT2G01060.1	1.689	0.300005	0.362803	0.630605	1.66	0.278721	0.360259	0.657704
AT4G29870.1	1.854	0.249734	0.383254	0.72364	1.662	0.219039	0.355026	0.747376
AT5G67570.1	1.674	0.296139	0.367662	0.641852	1.908	0.305004	0.403685	0.670163
AT4G08110.1	1.902	0.195375	0.369339	0.800426	1.862	0.187229	0.346146	0.79365
AT5G01390.4	1.979	0.228523	0.379579	0.754672	1.94	0.20424	0.365306	0.77868
AT5G01390.3	2.011	0.215228	0.380618	0.777282	1.849	0.190774	0.349856	0.786695
AT5G59180.1	1.526	0.22804	0.366306	0.746037	1.8	0.216251	0.347767	0.743003
AT1G58684.1	1.618	0.386796	0.362951	0.521983	2.081	0.367209	0.386488	0.571178
AT5G03905.1	1.795	0.245436	0.368225	0.712244	1.57	0.253805	0.386592	0.725641
AT5G15610.2	1.903	0.27287	0.369919	0.677666	1.56	0.274993	0.366874	0.67506
AT5G15610.1	2.002	0.262664	0.373651	0.695329	1.573	0.259522	0.369005	0.700199
AT1G80950.1	1.589	0.271907	0.373587	0.687968	1.455	0.2436	0.323216	0.671206
AT4G33565.1	2.228	0.229201	0.38831	0.760625	1.729	0.205811	0.344864	0.753492
AT2G22970.1	1.891	0.225857	0.375676	0.756358	2.296	0.232742	0.42131	0.78233
AT5G50110.1	1.557	0.238463	0.363377	0.725912	1.475	0.225613	0.337188	0.720011
AT1G65320.1	1.817	0.232905	0.376918	0.745688	1.99	0.234421	0.380984	0.745965
AT1G13170.1	1.929	0.245153	0.37811	0.727813	1.652	0.219429	0.32468	0.713912
AT1G13170.2	1.987	0.236146	0.381038	0.744329	1.709	0.211139	0.329929	0.735065
AT3G51430.1	2.064	0.249264	0.375476	0.720559	1.573	0.22765	0.306172	0.676899
AT1G14010.1	1.529	0.313262	0.363854	0.615139	1.62	0.295408	0.340116	0.610101
AT5G42780.1	1.673	0.26306	0.368158	0.693837	1.633	0.231909	0.329999	0.699375
AT1G28580.2	1.703	0.238002	0.376746	0.741492	1.773	0.232349	0.378877	0.750453
AT1G28580.1	1.587	0.268928	0.37751	0.696204	1.688	0.25895	0.380646	0.712334
AT1G31800.1	1.676	0.300889	0.364103	0.633176	1.677	0.30924	0.384354	0.645513
AT5G16110.1	1.888	0.24708	0.371467	0.718769	1.744	0.243441	0.37064	0.725714
AT5G55990.1	2.018	0.30918	0.387357	0.644366	1.978	0.322594	0.431429	0.676204
AT3G52220.1	1.962	0.341193	0.366647	0.57686	1.498	0.33934	0.363215	0.582933
AT5G45100.2	2.148	0.244287	0.382362	0.736267	1.664	0.231666	0.355879	0.729893
AT4G13200.1	1.682	0.301432	0.36616	0.633054	1.776	0.307254	0.392771	0.653017
AT3G56120.1	1.808	0.244512	0.380346	0.732394	2.051	0.231495	0.398534	0.768893
AT5G44020.1	1.709	0.359441	0.361322	0.550547	2.347	0.41671	0.482245	0.613117
AT3G10350.2	1.667	0.264706	0.368144	0.691591	1.828	0.264523	0.38179	0.706864
AT1G06360.1	1.493	0.318451	0.372724	0.619733	1.511	0.290535	0.358449	0.642526
AT3G53560.1	1.785	0.29752	0.363722	0.63626	1.798	0.315854	0.398067	0.648574
AT1G21650.1	1.967	0.267535	0.381573	0.697771	1.618	0.242632	0.348544	0.703034
AT1G21650.2	1.963	0.272334	0.382112	0.690883	1.621	0.250481	0.350419	0.691876
AT1G21650.3	2.077	0.241396	0.376325	0.731721	1.708	0.22018	0.34001	0.729274
AT1G52980.1	1.848	0.327169	0.365769	0.596477	1.644	0.321011	0.346663	0.584258
AT1G30330.1	2.106	0.253307	0.377384	0.715071	1.999	0.249712	0.372437	0.717225
AT5G44000.1	1.696	0.24805	0.369371	0.717279	2.052	0.250049	0.389383	0.734041
AT1G30330.2	2.106	0.252103	0.377039	0.716425	1.995	0.247556	0.371632	0.719684
AT3G10330.1	1.654	0.257068	0.367954	0.700984	1.652	0.243561	0.370976	0.72681
AT4G08500.1	1.811	0.255756	0.369711	0.703337	2.133	0.284873	0.427666	0.717889
AT4G03260.2	1.817	0.259648	0.370712	0.700859	1.428	0.242194	0.332366	0.68673
AT5G67320.1	1.614	0.337222	0.358295	0.576551	1.695	0.328038	0.345336	0.57151
AT4G31180.1	2.033	0.295322	0.375883	0.651551	2.339	0.280893	0.380288	0.676482
AT4G31180.2	2.038	0.289399	0.376872	0.661461	2.384	0.278508	0.386504	0.686352
AT4G03200.2	1.993	0.254033	0.36855	0.708447	2.006	0.249939	0.370406	0.716223
AT4G03200.1	1.916	0.280035	0.370025	0.670776	1.94	0.279579	0.381431	0.683273
AT1G08880.1	1.601	0.315379	0.363049	0.606972	1.806	0.320567	0.397357	0.644917
AT1G09580.1	1.622	0.230323	0.371138	0.746237	1.49	0.21737	0.361807	0.755861
AT5G44240.2	1.828	0.227147	0.379999	0.757594	1.685	0.197409	0.33035	0.758083
AT3G57660.1	2.207	0.214272	0.381255	0.778093	2.162	0.206373	0.347308	0.759723
ATCG00250.1	1.411	0.236048	0.3755	0.738407	0.525	0.127429	0.194563	0.726813
AT1G74260.1	1.749	0.290614	0.366813	0.648803	1.902	0.300692	0.406723	0.68031
AT3G22590.1	1.841	0.313763	0.373019	0.625438	1.736	0.31238	0.384978	0.641097
AT1G52500.1	2.223	0.243028	0.382215	0.732369	2.718	0.245024	0.441137	0.777733
AT3G25717.1	1.292	0.303663	0.363818	0.632982	1.725	0.307376	0.401152	0.665925
AT2G46030.1	1.397	0.240703	0.359681	0.718739	2.101	0.244139	0.390581	0.739501
AT3G57080.1	1.588	0.247532	0.368443	0.717504	2.055	0.261187	0.438548	0.758867
AT2G47110.1	1.423	0.355108	0.338739	0.524724	1.729	0.361958	0.362191	0.54805
AT2G47110.2	1.466	0.352248	0.339532	0.529142	1.599	0.367906	0.376391	0.559114
AT3G25190.1	2.219	0.231718	0.387749	0.753584	2.422	0.250355	0.439825	0.771661
AT5G27150.1	1.859	0.243063	0.368296	0.723797	1.492	0.193756	0.280671	0.704698
AT2G45010.1	1.637	0.285522	0.382172	0.673164	1.62	0.261675	0.400773	0.727985
AT1G01790.1	1.827	0.289367	0.367919	0.652808	2.287	0.31379	0.464998	0.712534
AT5G57120.1	1.716	0.348264	0.357744	0.561193	1.756	0.338187	0.350538	0.563808
AT5G20520.1	1.659	0.262073	0.365988	0.690701	1.957	0.252125	0.366106	0.707464
AT3G04310.1	1.792	0.248357	0.385173	0.729794	1.451	0.234576	0.33425	0.697125
AT1G11910.1	1.73	0.330047	0.358014	0.584708	1.395	0.320931	0.336874	0.571721
AT4G12310.1	1.671	0.264225	0.366232	0.688047	1.89	0.25226	0.379119	0.722542
AT1G27970.2	1.934	0.222445	0.36051	0.748441	1.512	0.209075	0.330548	0.740064
AT5G09230.5	1.876	0.235154	0.385867	0.749832	1.914	0.217868	0.34059	0.729106
AT4G30020.1	2.298	0.254543	0.375993	0.711911	2.038	0.235882	0.365239	0.731316
AT5G20500.1	1.572	0.335064	0.358878	0.578514	1.357	0.299721	0.342351	0.611079
AT2G01190.1	1.968	0.298135	0.36797	0.642242	2.023	0.291625	0.389225	0.671428
AT1G01780.1	1.507	0.231502	0.373434	0.748648	1.389	0.19495	0.32815	0.762413
AT5G62050.1	1.709	0.257058	0.369293	0.701375	1.895	0.232504	0.35056	0.72053
AT3G60130.1	1.801	0.29128	0.370389	0.653027	1.875	0.296241	0.413098	0.692624
AT2G40750.1	1.549	0.285824	0.364818	0.656429	2.077	0.292136	0.463334	0.74323
AT3G60130.3	1.865	0.273801	0.37068	0.677556	1.889	0.272484	0.397627	0.709714
AT1G09830.1	1.614	0.247456	0.359308	0.706751	2.202	0.273954	0.408981	0.716765
AT3G12120.2	1.768	0.322836	0.3619	0.59574	1.53	0.295372	0.317962	0.581504
AT3G12550.1	2.01	0.226733	0.370133	0.752056	1.892	0.225374	0.3595	0.741995
AT3G19640.1	1.584	0.271216	0.367224	0.67762	1.794	0.24675	0.349422	0.693786
AT3G06480.1	2.267	0.253819	0.381655	0.716298	2.321	0.231244	0.377761	0.745921
AT1G32460.1	1.662	0.281484	0.374976	0.67502	1.892	0.297722	0.467065	0.73746
AT2G23070.1	1.462	0.268011	0.36369	0.682291	1.861	0.299052	0.422672	0.69836
AT5G27290.2	1.762	0.271595	0.375601	0.68758	2.101	0.292934	0.460274	0.740236
AT5G02800.1	1.815	0.223072	0.370723	0.754745	1.815	0.215349	0.362354	0.761641
AT2G16930.1	1.453	0.264933	0.363064	0.685627	1.218	0.233108	0.320078	0.688796
AT2G16930.2	1.445	0.298175	0.362472	0.633925	1.231	0.258882	0.326191	0.652488
AT2G16930.3	1.446	0.262806	0.363632	0.689579	1.23	0.240139	0.327007	0.685992
AT5G24314.2	1.409	0.311812	0.365576	0.620866	1.927	0.312983	0.421435	0.679544
AT4G16141.1	1.786	0.347692	0.372067	0.576395	1.999	0.345946	0.410299	0.623101
AT5G19930.2	1.739	0.184163	0.36589	0.815197	2.466	0.172967	0.42195	0.86697
AT5G42770.1	1.549	0.271656	0.361992	0.671205	1.553	0.271459	0.354348	0.665237
AT5G42770.2	1.619	0.243803	0.358538	0.70827	1.642	0.244699	0.356873	0.708944
AT5G19930.1	1.753	0.177453	0.363476	0.82369	2.476	0.170287	0.423143	0.871311
AT2G16950.2	2.051	0.239244	0.380953	0.740175	2.236	0.250276	0.411967	0.752108
AT2G16950.1	2.109	0.235079	0.384317	0.749299	2.291	0.245803	0.41499	0.760511
AT5G10060.1	2.292	0.259143	0.38005	0.706964	2.197	0.268011	0.405406	0.720465
AT3G29160.1	1.8	0.254128	0.381207	0.716794	2.002	0.253005	0.399858	0.735727
AT3G29160.2	1.755	0.259361	0.379227	0.707119	1.982	0.259421	0.401337	0.727455
AT3G29160.3	1.751	0.259016	0.377789	0.705325	1.947	0.260523	0.400023	0.725254
AT1G69935.1	1.584	0.253829	0.368549	0.706967	1.472	0.232595	0.339767	0.710898
AT5G61770.3	2.432	0.26256	0.389649	0.707699	1.689	0.25589	0.365356	0.700585
AT5G61770.2	2.298	0.265718	0.383726	0.697426	1.616	0.252831	0.353471	0.692425
AT5G61770.1	2.322	0.262354	0.394617	0.712251	1.605	0.240684	0.352317	0.711551
AT2G34925.1	1.592	0.213303	0.36255	0.759863	1.109	0.186008	0.302965	0.755369
AT2G48121.1	1.385	0.227327	0.362337	0.746351	2.085	0.192313	0.424939	0.839737
AT1G11680.1	1.648	0.280089	0.378689	0.678868	2.134	0.285626	0.423003	0.714539
AT3G01610.1	2.379	0.242599	0.390868	0.740335	2.702	0.257897	0.421472	0.748683
AT2G48121.2	1.392	0.272672	0.3643	0.677058	1.795	0.255939	0.422695	0.75486
AT3G62650.1	1.614	0.320632	0.377313	0.623903	1.955	0.342752	0.435651	0.654724
AT5G64380.1	1.699	0.26399	0.369596	0.69203	2.762	0.273952	0.42694	0.728238
AT3G45900.1	1.501	0.239458	0.36864	0.732164	1.635	0.241669	0.393833	0.752798
AT2G33630.1	1.939	0.267496	0.373694	0.687826	2.139	0.271846	0.391986	0.698098
AT4G11100.2	1.755	0.287513	0.36302	0.648261	1.818	0.301456	0.387903	0.658529
AT4G11100.1	1.723	0.316379	0.360584	0.603197	1.779	0.325836	0.383365	0.619524
AT5G05730.1	1.839	0.306071	0.363289	0.620108	1.692	0.303402	0.376644	0.643711
AT2G37400.1	1.662	0.287648	0.369583	0.655331	1.652	0.244827	0.324273	0.667246
AT5G05730.2	1.815	0.290442	0.364873	0.644773	1.718	0.29181	0.376976	0.660364
AT1G74920.1	1.698	0.325795	0.35593	0.585162	1.716	0.328683	0.359964	0.588646
AT1G29880.1	1.674	0.318923	0.370111	0.614742	1.939	0.344376	0.399806	0.61437
AT5G08560.2	1.933	0.260678	0.373184	0.700545	1.926	0.26471	0.406016	0.728763
AT1G54610.1	2.018	0.273675	0.362338	0.670506	1.67	0.273194	0.345556	0.651825
AT1G54610.2	2.054	0.26242	0.363617	0.68973	1.69	0.259951	0.345708	0.672777
AT1G54610.3	2.044	0.267186	0.364565	0.683141	1.688	0.262977	0.347762	0.670629
AT5G23630.1	1.842	0.257215	0.38495	0.715725	1.823	0.24419	0.365945	0.717821
AT5G55580.1	2.067	0.23975	0.388669	0.743508	2.131	0.242086	0.413215	0.763045
AT1G25560.1	1.454	0.305505	0.360838	0.624696	1.846	0.332319	0.445169	0.676668
AT1G65840.1	2.487	0.23417	0.381588	0.748718	2.422	0.244908	0.438956	0.780806
AT1G19740.1	1.701	0.326906	0.356822	0.582754	1.808	0.320516	0.397496	0.638679
AT2G38000.1	1.976	0.304519	0.381222	0.644332	2.231	0.284315	0.3927	0.683717
AT1G20816.1	1.518	0.259043	0.369932	0.699311	1.812	0.279513	0.436135	0.73513
AT5G43760.1	2.066	0.346666	0.366119	0.570557	1.97	0.35463	0.404986	0.607456
AT4G28740.1	1.916	0.268489	0.373083	0.690662	1.574	0.228979	0.297111	0.662364
AT5G23405.2	1.564	0.281225	0.378778	0.678189	1.704	0.290339	0.399381	0.68827
AT3G16140.1	1.41	0.414784	0.343765	0.469152	1.972	0.481045	0.463615	0.533532
AT1G51610.1	2.199	0.252785	0.369019	0.707375	2.243	0.28074	0.463319	0.75553
AT1G08370.1	1.749	0.247824	0.375141	0.723473	1.431	0.217674	0.328838	0.724206
AT2G22490.1	1.875	0.238261	0.371265	0.734037	1.491	0.212837	0.311842	0.711391
AT2G22490.2	1.898	0.236667	0.372567	0.737588	1.522	0.212516	0.315123	0.71568
AT1G24020.1	1.977	0.28515	0.386523	0.677364	1.778	0.290184	0.385109	0.671506
AT3G16720.1	2.164	0.219783	0.373474	0.763045	2.02	0.269326	0.485781	0.78609
AT1G73710.1	2.785	0.21029	0.389282	0.787927	2.357	0.203378	0.394656	0.803472
AT5G47435.1	2.008	0.267894	0.382404	0.698531	1.532	0.240311	0.337776	0.694319
AT1G07135.1	1.291	0.419093	0.36277	0.490372	1.71	0.460014	0.459111	0.5523
AT4G32070.1	1.546	0.303565	0.35826	0.621052	1.496	0.277247	0.331315	0.626185
AT1G66100.1	1.406	0.30025	0.352733	0.620919	2.416	0.477948	0.642733	0.680032
AT5G60640.1	2.093	0.300606	0.354081	0.617062	1.554	0.295803	0.346759	0.617447
AT5G60640.2	2.162	0.289542	0.357153	0.637392	1.6	0.285452	0.348522	0.635383
AT5G60640.3	2.117	0.292048	0.357833	0.634426	1.567	0.28474	0.347046	0.63398
AT1G25211.1	1.673	0.29742	0.365897	0.637338	1.832	0.28821	0.380292	0.669026
AT3G52420.1	1.528	0.284969	0.360759	0.647999	1.615	0.299239	0.389723	0.662199
AT3G53500.2	1.895	0.307694	0.365989	0.622775	1.912	0.320032	0.417293	0.664027
AT3G53500.1	1.991	0.298507	0.371271	0.641755	1.919	0.310333	0.414733	0.673728
AT5G60620.1	1.663	0.289195	0.370841	0.655824	1.595	0.272008	0.353741	0.663408
AT2G47850.1	1.689	0.235379	0.378789	0.742235	1.809	0.202595	0.348043	0.768569
AT1G45249.1	1.725	0.290404	0.361086	0.644309	1.263	0.233498	0.262187	0.601018
AT1G45249.2	1.547	0.270798	0.361634	0.675721	1.27	0.213549	0.26411	0.643455
AT1G45249.3	1.569	0.275201	0.361423	0.66783	1.263	0.219571	0.260413	0.624956
AT2G01100.1	1.751	0.34909	0.363308	0.566036	1.389	0.361633	0.360966	0.551526
AT2G01100.3	1.822	0.318654	0.36718	0.609835	1.44	0.326555	0.364159	0.600486
AT2G01100.2	1.695	0.364136	0.360424	0.543419	1.359	0.371274	0.35607	0.533699
AT5G27860.1	1.49	0.281707	0.369087	0.667625	1.531	0.264611	0.356509	0.678735
AT4G23885.1	1.722	0.237522	0.366895	0.730636	1.4	0.198744	0.322668	0.749756
AT5G27860.2	1.503	0.264933	0.36903	0.694291	1.531	0.244693	0.348695	0.702141
AT1G54310.1	1.761	0.280198	0.374696	0.67455	1.721	0.25861	0.383335	0.714699
AT1G54770.1	1.405	0.270747	0.362969	0.676896	1.447	0.24833	0.339828	0.68546
AT3G21610.2	2.796	0.193082	0.384705	0.810681	2.055	0.190066	0.343446	0.783452
AT3G14350.2	1.77	0.247363	0.371691	0.720618	1.419	0.228212	0.326781	0.703732
AT3G14350.1	1.708	0.265103	0.37	0.691429	1.398	0.242094	0.325806	0.678345
AT3G21610.1	2.755	0.200046	0.383671	0.798621	2.045	0.198102	0.343948	0.769105
AT1G33600.1	2.163	0.29249	0.380398	0.661557	2.522	0.34005	0.513299	0.72064
AT1G32160.1	1.677	0.278387	0.370859	0.672101	2.163	0.310219	0.464281	0.719464
AT5G08760.1	1.71	0.318448	0.378145	0.620962	1.885	0.320481	0.390504	0.628364
AT5G39740.2	1.775	0.372841	0.36365	0.539173	2.193	0.366223	0.397008	0.584653
AT5G54860.1	1.965	0.222791	0.378244	0.762644	2.08	0.189456	0.335079	0.775427
AT2G21260.1	2.24	0.167799	0.389947	0.855921	2.115	0.169285	0.408408	0.865101
AT3G07430.1	1.628	0.315402	0.356709	0.604609	1.731	0.292385	0.347989	0.62568
AT4G24510.1	1.824	0.291241	0.368224	0.651155	1.728	0.277831	0.373128	0.678724
AT1G70090.1	1.658	0.290225	0.372883	0.659658	2.168	0.275298	0.413291	0.716447
AT1G70090.2	1.687	0.253142	0.367538	0.709432	2.322	0.245123	0.425458	0.769557
AT1G64572.1	1.698	0.297627	0.384186	0.660233	1.573	0.286189	0.385758	0.680897
AT1G70430.1	2.842	0.168271	0.410908	0.863995	2.202	0.155815	0.364904	0.855979
AT4G27040.1	1.535	0.271526	0.365883	0.675663	1.673	0.252158	0.354365	0.692921
AT5G66520.1	1.844	0.247246	0.372043	0.716374	2.756	0.302409	0.513498	0.76315
AT3G21810.1	1.787	0.297739	0.366125	0.639678	1.92	0.31627	0.412342	0.663652
AT1G17650.1	1.73	0.289586	0.369585	0.656129	1.742	0.329739	0.433205	0.669131
AT1G76405.2	1.511	0.278086	0.371697	0.676528	2.002	0.314456	0.461613	0.710259
AT4G32605.1	2.199	0.291049	0.396181	0.67548	2.055	0.264277	0.389901	0.710688
AT2G41500.1	2.658	0.25709	0.386818	0.714437	2.238	0.238856	0.399817	0.753321
AT5G51640.1	2.55	0.21915	0.39438	0.77599	2.118	0.195466	0.349211	0.778258
AT3G21430.2	2.489	0.239491	0.391688	0.746166	2.438	0.216331	0.359883	0.751606
AT3G48820.1	1.843	0.251387	0.376398	0.720139	1.478	0.238507	0.33975	0.701283
AT3G48820.2	1.839	0.256682	0.378621	0.714343	1.479	0.241148	0.342491	0.700295
AT1G71850.1	1.459	0.255971	0.363135	0.69824	1.711	0.227425	0.350511	0.728929
AT2G26900.1	1.819	0.335814	0.365969	0.585181	1.753	0.337094	0.395726	0.62088
AT2G46535.1	1.619	0.240003	0.362882	0.719902	1.323	0.204177	0.286786	0.694528
AT4G26670.1	2.302	0.251853	0.374213	0.709761	2.085	0.243188	0.409356	0.762543
AT1G36050.2	1.861	0.296761	0.366386	0.640995	1.534	0.274747	0.338493	0.641938
AT3G58500.1	1.634	0.311685	0.352092	0.599501	1.688	0.310039	0.364836	0.617495
AT5G54720.1	1.627	0.258545	0.371171	0.705954	2.709	0.317296	0.530107	0.756763
AT3G02870.1	1.953	0.241125	0.366121	0.724424	1.789	0.229411	0.371117	0.749116
AT3G02870.3	1.955	0.227021	0.363212	0.744516	1.811	0.218765	0.372798	0.767858
AT3G02870.2	1.531	0.219834	0.365522	0.759349	1.686	0.213288	0.364888	0.7683
AT5G47110.1	1.75	0.338463	0.360466	0.576486	1.425	0.343495	0.378077	0.595178
AT1G18250.1	1.862	0.260953	0.391754	0.716251	2.558	0.267967	0.446747	0.755673
AT1G18250.2	1.95	0.243326	0.391135	0.740951	2.621	0.247493	0.438877	0.776896
AT3G66652.1	2.156	0.230846	0.388407	0.756437	2.543	0.231505	0.379488	0.748161
AT3G66652.2	2.156	0.230079	0.388143	0.757437	2.532	0.229658	0.377297	0.74895
AT2G03710.2	1.679	0.280114	0.374788	0.669944	1.86	0.250673	0.348554	0.689208
AT2G03710.3	1.743	0.259814	0.376564	0.70434	1.98	0.234372	0.351725	0.717933
AT4G21540.3	1.979	0.313287	0.368166	0.619222	1.605	0.290127	0.356238	0.639972
AT5G20000.1	1.704	0.275642	0.369896	0.675642	1.486	0.273431	0.335791	0.63957
AT5G54310.1	2.136	0.323525	0.37178	0.610295	2.223	0.31504	0.387792	0.639462
AT4G18060.1	2.025	0.278713	0.386672	0.686231	2.592	0.294233	0.440971	0.715241
AT2G30150.1	1.522	0.279181	0.363981	0.665755	1.594	0.276749	0.372218	0.676928
AT5G20140.2	1.829	0.266257	0.366131	0.688319	1.667	0.266499	0.373114	0.693425
AT5G40970.1	1.495	0.154438	0.34804	0.851659	1.676	0.153269	0.34504	0.851047
AT5G59250.1	1.433	0.28254	0.375982	0.673117	1.789	0.281349	0.412907	0.71242
AT4G29480.1	1.839	0.31907	0.360573	0.601537	1.714	0.331568	0.385309	0.617213
AT5G37830.1	1.817	0.293986	0.373189	0.652895	2.079	0.290064	0.383197	0.668566
AT3G49601.1	1.828	0.401937	0.356332	0.494074	1.725	0.407091	0.370182	0.507182
AT1G28340.1	2.094	0.253787	0.382459	0.71749	1.648	0.234085	0.360461	0.731076
AT5G44800.1	1.995	0.23968	0.369762	0.728658	1.909	0.226342	0.359622	0.739777
AT2G01021.1	1.562	0.167	0.36515	0.829026	1.545	0.172156	0.364299	0.812733
AT3G06190.1	1.571	0.295525	0.367782	0.645425	1.599	0.256535	0.343043	0.674112
AT4G00730.2	1.823	0.253526	0.369182	0.708224	1.685	0.232751	0.363263	0.733714
AT4G00730.1	1.789	0.261964	0.367661	0.693579	1.655	0.241558	0.362186	0.718449
AT4G38260.1	1.852	0.243499	0.370137	0.726693	1.921	0.246202	0.374288	0.723388
AT2G29580.1	1.715	0.257243	0.393453	0.725665	1.794	0.229136	0.356249	0.733235
AT3G16810.1	1.643	0.258975	0.368341	0.69918	1.686	0.246023	0.365076	0.716047
AT2G46220.1	1.511	0.347971	0.356949	0.559712	1.807	0.368641	0.420808	0.607897
AT2G18700.1	1.906	0.3025	0.373789	0.642198	2.071	0.290959	0.407504	0.693787
AT5G14120.1	1.606	0.312601	0.356807	0.606349	2.391	0.385778	0.512653	0.672283
AT5G24630.5	1.835	0.230218	0.371894	0.745693	2.2	0.247714	0.408095	0.753731
AT5G24630.4	1.819	0.23644	0.370236	0.733542	2.206	0.249474	0.409445	0.752221
AT5G04480.2	1.834	0.254491	0.372274	0.709242	1.675	0.230985	0.331762	0.703053
AT5G24630.6	1.853	0.23004	0.37256	0.745843	2.235	0.240298	0.411088	0.767205
AT5G24630.1	1.834	0.233352	0.371093	0.739031	2.215	0.244398	0.405828	0.756701
AT5G24630.3	1.82	0.2362	0.36924	0.732491	2.211	0.248385	0.4101	0.754527
AT5G52470.1	1.69	0.370087	0.356853	0.534923	1.531	0.365987	0.380155	0.569395
AT4G15560.1	1.644	0.344047	0.36421	0.576254	2.13	0.372156	0.450975	0.636096
AT4G00750.1	1.653	0.31075	0.366159	0.619561	1.552	0.290636	0.349569	0.631063
AT2G40660.1	1.775	0.314983	0.366999	0.615087	1.61	0.322022	0.38969	0.63417
AT3G52155.1	1.859	0.271216	0.367235	0.677819	1.922	0.268564	0.37693	0.695001
AT4G39350.1	2.226	0.28257	0.365198	0.657991	1.826	0.288763	0.386011	0.672565
AT1G24510.1	1.435	0.343919	0.353952	0.562004	1.652	0.348944	0.367573	0.575301
AT3G52390.1	1.542	0.256583	0.374317	0.707674	1.591	0.255058	0.363359	0.69929
AT1G76360.1	1.754	0.279717	0.371676	0.670999	2.184	0.319487	0.461264	0.704249
AT1G09160.2	2.135	0.238871	0.372206	0.73278	1.661	0.225467	0.38095	0.764892
AT3G52390.2	1.547	0.250085	0.373581	0.716924	1.577	0.243679	0.352978	0.706143
AT4G31310.1	1.439	0.275176	0.353688	0.655779	1.669	0.307673	0.404267	0.668317
AT3G58040.1	1.796	0.262077	0.370459	0.695037	1.45	0.220511	0.306005	0.688754
AT4G35750.1	1.666	0.318672	0.375387	0.620877	2.108	0.324766	0.435068	0.673866
AT2G45910.1	2.028	0.258988	0.383535	0.713278	1.789	0.234343	0.341812	0.709158
AT1G20110.1	1.813	0.268193	0.374184	0.691043	1.812	0.242002	0.347889	0.701868
AT3G53900.2	1.813	0.279582	0.369914	0.668867	2.086	0.324609	0.465981	0.703384
AT3G53900.1	1.443	0.259216	0.366229	0.697158	2.052	0.307143	0.458576	0.718939
AT5G54300.1	1.944	0.23445	0.372306	0.741996	1.441	0.204166	0.288461	0.695686
AT1G09590.1	1.601	0.343176	0.354539	0.563383	1.574	0.351229	0.380774	0.588732
AT2G39000.1	2.028	0.260046	0.369653	0.697284	1.844	0.241593	0.391556	0.74641
AT1G18030.2	1.819	0.231302	0.374787	0.744084	1.895	0.229659	0.355611	0.73081
AT4G30950.1	1.735	0.352373	0.356422	0.554204	1.69	0.367601	0.399532	0.587045
AT3G22142.1	2.134	0.296385	0.362262	0.629858	2.563	0.404933	0.513022	0.649621
AT5G22770.2	2.011	0.282926	0.373381	0.666917	1.981	0.274903	0.379193	0.685619
AT4G38040.1	1.832	0.231537	0.369975	0.742584	1.559	0.230974	0.355051	0.727702
AT2G26500.2	1.451	0.345928	0.349939	0.552251	1.61	0.365474	0.381431	0.566934
AT2G26500.3	1.525	0.33602	0.349906	0.566634	1.782	0.362461	0.403107	0.594273
AT3G04880.1	1.615	0.295603	0.362279	0.634841	1.846	0.280211	0.365084	0.6652
AT4G35080.1	1.667	0.232852	0.370821	0.739431	1.581	0.211374	0.357633	0.763218
AT4G35080.3	1.751	0.219491	0.375313	0.765304	1.646	0.199216	0.360677	0.785979
AT1G80460.2	1.878	0.281064	0.362404	0.656022	1.657	0.274984	0.355938	0.66263
AT1G20770.1	1.534	0.282355	0.369488	0.667801	1.355	0.261877	0.333394	0.657414
AT5G61020.1	1.733	0.347344	0.360881	0.565808	1.676	0.334565	0.371909	0.596777
AT2G36145.1	1.407	0.371311	0.349613	0.524312	1.631	0.385875	0.388636	0.550319
AT5G17070.1	1.683	0.312404	0.360683	0.60942	1.551	0.319447	0.387381	0.635984
AT5G22770.1	1.964	0.300481	0.371319	0.639865	1.915	0.287235	0.37358	0.661616
AT5G04870.1	1.662	0.291371	0.359535	0.638548	1.841	0.304317	0.393847	0.660545
AT5G46430.2	1.236	0.33704	0.353493	0.573103	1.688	0.374604	0.394089	0.572577
AT5G46430.1	1.238	0.339826	0.35215	0.567464	1.681	0.376493	0.3929	0.569312
AT5G46250.2	2.094	0.281904	0.366757	0.660746	1.451	0.270773	0.350699	0.662934
AT3G48420.1	1.566	0.33383	0.35636	0.577459	1.828	0.338655	0.393408	0.615319
AT2G22170.1	1.522	0.296969	0.363021	0.638521	2.775	0.364691	0.554214	0.723365
AT4G19120.1	1.706	0.310459	0.367853	0.624168	1.48	0.27794	0.328225	0.622627
AT4G19120.2	1.692	0.31051	0.367429	0.623393	1.467	0.276204	0.324398	0.620074
AT1G04635.1	1.705	0.222063	0.377645	0.761768	1.844	0.199539	0.383242	0.799749
AT3G06670.2	1.932	0.254956	0.363045	0.699065	1.7	0.229789	0.333893	0.708148
AT3G06670.1	1.897	0.268312	0.362692	0.677152	1.669	0.245313	0.336048	0.683701
AT1G43670.1	1.377	0.343294	0.337489	0.537924	1.816	0.379552	0.397241	0.569298
AT5G63905.1	1.507	0.262066	0.366531	0.693473	1.754	0.296473	0.402247	0.677274
AT4G09650.1	1.724	0.371497	0.356105	0.530805	2.291	0.403438	0.454435	0.599832
AT3G17712.2	2.199	0.205181	0.379896	0.788414	2.138	0.184711	0.34139	0.787947
AT2G31600.2	1.9	0.188668	0.371472	0.810722	2.108	0.195293	0.397509	0.820354
AT2G30320.1	2.196	0.288185	0.369825	0.652136	1.625	0.29016	0.36439	0.647909
AT3G17712.3	2.155	0.213024	0.378003	0.7738	2.081	0.193981	0.337588	0.766776
AT5G01530.1	1.987	0.409634	0.352554	0.482992	2.299	0.415192	0.417913	0.554094
AT1G20960.1	1.902	0.299011	0.367284	0.636759	1.696	0.287758	0.353578	0.640021
AT1G20960.2	1.906	0.297541	0.367669	0.639458	1.702	0.287255	0.354777	0.642302
AT1G30460.1	2.294	0.245126	0.381835	0.731133	2.158	0.227785	0.355659	0.736193
AT3G50670.1	1.517	0.318851	0.35182	0.592358	1.373	0.325897	0.352812	0.58748
AT3G50670.2	1.703	0.273076	0.358672	0.664682	1.613	0.276265	0.361424	0.667026
AT4G01330.1	1.808	0.310888	0.367351	0.622023	2.458	0.377004	0.536501	0.698466
AT4G01330.2	1.861	0.295836	0.371339	0.649485	2.542	0.358833	0.540477	0.721069
AT4G36420.1	1.608	0.333656	0.375183	0.601093	1.735	0.333588	0.392256	0.622978
AT5G09220.1	1.699	0.277964	0.366726	0.669924	2.054	0.288591	0.433001	0.721316
AT3G05410.2	1.642	0.274524	0.36373	0.6725	1.889	0.301731	0.423189	0.697145
AT1G10060.2	2.219	0.258152	0.371639	0.699939	2.241	0.290258	0.482293	0.759224
AT1G10060.1	2.217	0.247846	0.37443	0.718706	2.268	0.280556	0.483361	0.7717
AT3G05410.1	1.452	0.227065	0.371709	0.752128	2.325	0.239815	0.434436	0.785131
AT2G14460.1	1.516	0.270209	0.36505	0.67867	1.137	0.227361	0.296025	0.664418
AT3G19990.1	1.735	0.290979	0.36231	0.638936	1.713	0.25805	0.335439	0.659565
AT2G33570.1	1.743	0.251244	0.36912	0.71113	2.495	0.257356	0.407197	0.736666
AT1G60995.1	1.786	0.246899	0.375539	0.720569	1.627	0.232469	0.342277	0.712162
AT2G27100.1	1.776	0.284762	0.369853	0.661024	1.658	0.25894	0.35613	0.685425
AT4G13220.1	1.454	0.257842	0.373915	0.708032	1.447	0.243839	0.34642	0.698434
AT4G39330.2	1.99	0.305456	0.385112	0.64646	1.356	0.24425	0.285711	0.617987
AT5G12350.1	1.874	0.243597	0.379786	0.731137	1.725	0.224445	0.34822	0.731188
AT5G05450.1	1.827	0.275761	0.366239	0.671924	2.009	0.289388	0.38731	0.674337
AT3G20860.1	1.935	0.202455	0.37348	0.792773	1.451	0.193817	0.305228	0.736543
AT2G20760.1	1.662	0.339958	0.350161	0.560017	1.702	0.314471	0.34594	0.591468
AT5G65430.1	1.508	0.296564	0.361381	0.636955	1.783	0.313923	0.417984	0.674763
AT5G65430.2	1.505	0.286733	0.358951	0.648243	1.794	0.308256	0.419075	0.684513
AT5G65430.3	1.545	0.252114	0.358534	0.701756	1.841	0.274772	0.413861	0.724974
AT3G17780.1	1.285	0.335509	0.361728	0.585559	1.692	0.294353	0.337491	0.604793
AT5G54440.1	2.012	0.244724	0.377277	0.728097	2.469	0.250039	0.391859	0.73424
AT2G28430.1	1.403	0.270333	0.369569	0.684208	1.72	0.260046	0.403503	0.733537
AT2G01870.1	3.08	0.218581	0.421598	0.79514	2.842	0.224773	0.486104	0.833586
AT3G02860.2	1.676	0.306376	0.362709	0.623511	2.179	0.313937	0.390299	0.640078
AT1G48920.1	1.758	0.404806	0.343367	0.474221	1.748	0.412294	0.386907	0.522754
AT2G28890.1	1.665	0.254659	0.36743	0.705882	1.925	0.259976	0.384367	0.713407
AT1G08580.1	1.691	0.345636	0.366835	0.57484	1.635	0.355062	0.389349	0.590139
AT3G08610.1	1.363	0.37003	0.347415	0.519967	1.32	0.328771	0.343506	0.568902
AT1G09150.1	1.477	0.290709	0.362849	0.648298	1.641	0.267167	0.36264	0.680146
AT3G06700.1	1.507	0.375049	0.352773	0.518378	1.534	0.374455	0.362698	0.536135
AT2G01970.1	1.745	0.251756	0.370637	0.711584	1.558	0.234398	0.335127	0.699532
AT3G19650.1	1.897	0.334316	0.371021	0.591548	1.654	0.363406	0.385718	0.578724
AT5G65000.1	2.19	0.240988	0.389268	0.740072	1.996	0.232919	0.38363	0.747614
AT1G07020.1	1.929	0.307953	0.378623	0.639335	1.571	0.278453	0.347509	0.645658
AT5G65000.2	2.267	0.225617	0.392642	0.767383	2.026	0.217843	0.380439	0.76872
AT4G21150.2	1.736	0.264479	0.377722	0.699548	1.927	0.247188	0.369024	0.717193
AT4G21150.3	1.87	0.268448	0.382179	0.697774	1.595	0.247728	0.369528	0.718023
AT4G21150.1	1.862	0.270091	0.381568	0.694826	1.592	0.248501	0.36784	0.7148
AT3G61080.1	1.542	0.331742	0.361818	0.589064	2.102	0.370426	0.455611	0.638322
AT5G65020.2	2.214	0.276545	0.377541	0.681835	1.567	0.246904	0.32168	0.66204
AT5G65020.1	2.271	0.283021	0.379073	0.674063	1.587	0.250761	0.324523	0.660063
AT1G23290.1	1.261	0.347691	0.341935	0.541275	1.353	0.301916	0.358589	0.626533
AT5G47500.1	2.025	0.27081	0.372297	0.685127	2.053	0.314111	0.462426	0.712413
AT1G34000.1	1.533	0.267347	0.357885	0.677041	1.639	0.254527	0.357176	0.693095
AT3G53410.1	2.181	0.211062	0.386063	0.785108	2.026	0.213146	0.382696	0.781515
AT5G23940.1	2.531	0.270476	0.384395	0.692281	1.761	0.266406	0.377768	0.696579
AT1G13870.1	1.812	0.277531	0.376451	0.677258	1.589	0.245008	0.363891	0.715481
AT3G05900.1	1.715	0.384131	0.350101	0.505801	2.027	0.429309	0.430298	0.551175
AT1G55140.1	2.181	0.309547	0.373813	0.627913	1.678	0.268477	0.367908	0.68146
AT2G26560.1	1.701	0.344746	0.357793	0.563103	2.872	0.490239	0.65821	0.677598
AT2G39080.1	1.694	0.304592	0.37233	0.637161	1.864	0.318471	0.413118	0.660727
AT4G39838.1	1.516	0.294452	0.354493	0.630167	2.189	0.297847	0.430627	0.702981
AT4G02120.1	1.785	0.286398	0.372299	0.659465	1.755	0.291789	0.404835	0.688873
AT4G31420.1	1.461	0.28547	0.36343	0.6546	1.403	0.24822	0.31681	0.655289
AT2G38870.1	1.507	0.270215	0.365931	0.679752	1.484	0.250545	0.343137	0.68133
AT5G38480.2	1.495	0.321818	0.357671	0.595944	1.877	0.365195	0.422485	0.612248
AT5G38480.1	1.474	0.347586	0.354334	0.558193	1.848	0.392769	0.417095	0.575082
AT3G02110.1	1.653	0.267415	0.370065	0.688429	1.919	0.257717	0.397926	0.731369
AT1G17470.1	1.695	0.313646	0.368433	0.620898	1.827	0.296463	0.35598	0.627745
AT5G49470.3	2.265	0.248551	0.373395	0.717471	2.314	0.257251	0.391206	0.721385
AT3G14400.1	2.222	0.25376	0.379379	0.713984	2.243	0.231463	0.337754	0.704513
AT1G17470.2	1.692	0.306928	0.369265	0.631527	1.835	0.290961	0.357825	0.63799
AT1G09130.3	1.724	0.335059	0.361898	0.581897	1.548	0.331083	0.373315	0.605474
AT1G09130.2	1.728	0.345311	0.364044	0.57067	1.573	0.343895	0.382452	0.598853
AT1G09130.1	1.706	0.350877	0.359766	0.559537	1.536	0.345254	0.371618	0.584405
AT1G55150.1	1.554	0.251471	0.370286	0.712892	1.669	0.239434	0.369962	0.731658
AT1G07780.4	1.83	0.226479	0.370831	0.753198	1.796	0.250432	0.418792	0.761472
AT1G07780.5	1.804	0.251649	0.369791	0.711098	1.712	0.272713	0.421751	0.733376
AT1G07780.2	1.742	0.269156	0.366181	0.679413	1.664	0.294937	0.42401	0.705404
AT1G07780.3	1.849	0.236994	0.372542	0.737483	1.742	0.258554	0.419803	0.751546
AT1G07780.1	1.72	0.271268	0.367407	0.678806	1.628	0.294674	0.416268	0.698563
AT3G10070.1	2.057	0.20828	0.370462	0.777319	2.328	0.211508	0.39655	0.79162
AT5G19010.1	1.961	0.274487	0.370086	0.674957	1.948	0.27749	0.387441	0.691338
AT4G25630.1	2.105	0.278989	0.389535	0.685797	1.849	0.246963	0.371172	0.717363
AT4G16360.3	1.504	0.226704	0.364301	0.74471	1.858	0.205886	0.355603	0.770917
AT4G16360.2	2.465	0.240434	0.381374	0.73523	1.915	0.219234	0.358897	0.750672
AT4G16360.1	2.44	0.244294	0.381405	0.729757	1.879	0.223201	0.357499	0.742279
AT2G29970.1	1.943	0.252885	0.376185	0.715675	2.023	0.243934	0.365353	0.715436
AT5G19030.2	1.801	0.201227	0.362954	0.781972	1.501	0.205046	0.325466	0.739421
AT5G16750.1	1.798	0.252412	0.372748	0.711978	2.182	0.254308	0.392409	0.72626
AT4G26970.1	1.688	0.28439	0.363319	0.6564	1.54	0.273565	0.360586	0.6712
AT3G22320.1	1.479	0.342065	0.363637	0.579324	1.406	0.34455	0.371131	0.583947
AT1G68160.1	1.814	0.215502	0.381668	0.774668	1.667	0.195848	0.363974	0.792774
AT3G09490.1	2.149	0.233706	0.396025	0.760452	2.258	0.256199	0.40515	0.736194
ATCG00920.1	2.255	0.229536	0.376036	0.719816	2.433	0.238164	0.359579	0.69678
AT5G66210.4	1.987	0.328408	0.369926	0.600601	2.455	0.372254	0.495908	0.674182
AT5G66210.1	1.915	0.32967	0.365644	0.593977	2.305	0.37567	0.482067	0.658445
AT4G13430.1	1.619	0.363607	0.349969	0.53137	2.158	0.372501	0.41437	0.598271
AT5G66210.3	1.548	0.301957	0.362617	0.631032	2.348	0.345538	0.488233	0.695907
AT5G22330.1	1.431	0.285549	0.363629	0.656072	1.576	0.291019	0.38133	0.667452
AT3G17170.1	1.449	0.406481	0.360872	0.500715	1.836	0.432236	0.413927	0.533652
AT1G06960.1	1.502	0.276279	0.370613	0.676581	2.038	0.271022	0.399001	0.709192
AT5G59613.2	1.604	0.288908	0.361544	0.647181	1.763	0.267116	0.395082	0.7131
AT1G06960.3	1.524	0.266354	0.371556	0.692794	2.041	0.256904	0.39258	0.723383
AT1G06960.2	1.522	0.270349	0.367654	0.68191	2.057	0.263596	0.395753	0.718047
AT3G24515.1	2.013	0.235641	0.36949	0.733157	2.052	0.25497	0.403866	0.738397
AT1G02050.1	1.843	0.234951	0.375492	0.737071	1.787	0.214217	0.360369	0.758118
AT4G26080.1	2.456	0.24577	0.380795	0.729604	1.127	0.181014	0.258193	0.702319
AT3G52150.2	1.616	0.354477	0.357005	0.551824	2.201	0.391622	0.44412	0.606565
AT3G52150.1	1.599	0.358417	0.354466	0.544042	2.158	0.396475	0.43446	0.591877
AT4G15820.1	1.43	0.299119	0.358873	0.631218	1.443	0.295606	0.337881	0.606899
AT2G43410.3	2.242	0.243698	0.37844	0.731253	1.643	0.23108	0.347379	0.720067
AT3G52890.1	1.939	0.220808	0.381817	0.768098	1.999	0.206641	0.364666	0.775567
AT5G09590.1	1.942	0.288392	0.381873	0.667827	1.699	0.25661	0.344815	0.675225
AT1G12270.1	1.593	0.310919	0.363048	0.617256	1.768	0.313984	0.374773	0.627661
AT3G12570.1	1.659	0.272643	0.372891	0.682759	1.567	0.250394	0.371456	0.716779
AT3G12570.3	1.669	0.267461	0.371445	0.688944	1.57	0.24503	0.369883	0.72344
AT3G12570.2	1.691	0.276025	0.373161	0.677645	1.572	0.246012	0.364717	0.715486
AT3G12570.4	1.683	0.261343	0.371405	0.698237	1.56	0.237178	0.363248	0.728696
AT5G55070.1	1.661	0.269185	0.374805	0.691451	1.534	0.228045	0.329183	0.706108
AT4G02520.1	1.757	0.324344	0.37236	0.610211	2.033	0.345466	0.410061	0.622744
AT3G52140.4	1.951	0.288473	0.373102	0.659329	2.622	0.323181	0.444625	0.685087
AT2G40830.3	1.888	0.22626	0.378638	0.757456	1.583	0.200145	0.332341	0.758048
AT2G40830.1	1.83	0.235778	0.375823	0.740176	1.588	0.209873	0.337988	0.747082
AT5G29000.1	1.687	0.241307	0.366486	0.724645	1.321	0.182788	0.262506	0.698906
AT3G52140.1	1.914	0.294663	0.37102	0.648103	2.553	0.329006	0.438572	0.67172
AT3G52140.2	1.943	0.29322	0.373137	0.652237	2.607	0.328437	0.444782	0.678553
AT5G29000.2	1.708	0.236935	0.367251	0.73227	1.338	0.178351	0.26285	0.709001
AT5G39840.1	1.976	0.237615	0.388084	0.746789	2.546	0.243959	0.416766	0.762414
AT1G10570.1	1.969	0.252248	0.380918	0.718487	1.694	0.242882	0.367145	0.722336
AT2G36000.2	1.877	0.30293	0.364728	0.625148	2.038	0.335818	0.43064	0.656056
AT1G10570.2	1.963	0.252595	0.38106	0.718488	1.687	0.242198	0.364967	0.720985
AT5G63310.1	1.506	0.342814	0.357184	0.566779	2.107	0.388935	0.406524	0.568663
ATMG01390.1	2.793	0.261069	0.393361	0.696712	2.982	0.244084	0.379929	0.714827
AT5G53120.4	1.949	0.21453	0.374777	0.775052	1.076	0.174013	0.229655	0.667485
AT1G21240.1	3.216	0.140295	0.418658	0.906472	2.329	0.163228	0.355929	0.834527
AT2G05310.1	2.007	0.338362	0.362987	0.578091	1.825	0.341197	0.402714	0.624285
AT4G38090.4	1.775	0.240253	0.381581	0.739637	1.951	0.237367	0.414223	0.773442
AT2G42770.1	1.899	0.22747	0.364926	0.744516	2.063	0.234666	0.400765	0.766637
AT4G12970.1	1.747	0.293174	0.379815	0.660609	1.903	0.307936	0.437938	0.697036
AT4G38090.1	1.687	0.256702	0.375941	0.708671	1.903	0.253393	0.416627	0.75286
AT1G80810.2	2.064	0.267583	0.383014	0.697101	1.987	0.252692	0.364719	0.702362
AT4G38090.3	1.763	0.237068	0.380095	0.742947	1.921	0.228339	0.402133	0.775493
AT4G38090.2	1.87	0.234415	0.38913	0.755071	2.126	0.235715	0.435027	0.791812
AT3G22520.1	1.86	0.269878	0.368434	0.682391	2.028	0.249392	0.363748	0.707465
AT4G00026.1	1.683	0.311362	0.366551	0.621218	1.585	0.300745	0.365911	0.63542
AT5G50640.1	1.964	0.269958	0.373921	0.68677	2.524	0.270528	0.40184	0.710436
AT1G55330.1	1.417	0.297618	0.35485	0.626657	1.33	0.296746	0.325197	0.592082
AT1G48790.1	1.786	0.256399	0.373194	0.705717	1.676	0.234856	0.336043	0.700312
AT1G35460.1	1.991	0.261687	0.380256	0.70156	1.753	0.239846	0.330094	0.682908
AT1G49470.1	3.49	0.19974	0.404038	0.810726	1.871	0.166925	0.326675	0.806089
AT5G52280.1	1.747	0.310966	0.359551	0.611329	1.665	0.291855	0.327334	0.598784
AT1G73820.1	1.81	0.283661	0.372302	0.666903	1.747	0.266646	0.367443	0.687542
AT5G53120.3	1.967	0.215639	0.377507	0.77569	1.089	0.174997	0.231476	0.668086
AT1G75220.1	1.857	0.296027	0.380557	0.657318	2.048	0.303012	0.456339	0.720511
AT3G48560.1	1.636	0.376657	0.347691	0.510734	1.917	0.379704	0.390623	0.561324
AT1G16320.1	1.612	0.268022	0.359376	0.676828	1.308	0.259816	0.34492	0.674342
AT1G11430.1	1.749	0.353429	0.353838	0.549588	1.704	0.371139	0.378499	0.556996
AT4G01100.2	1.724	0.297277	0.365	0.641233	1.384	0.261621	0.334439	0.657362
AT4G01100.1	1.711	0.308337	0.364923	0.625594	1.383	0.278248	0.336031	0.632428
AT3G62220.1	2.06	0.236171	0.372591	0.736338	2.156	0.221882	0.410559	0.791653
AT2G47640.4	1.538	0.276747	0.355105	0.650898	1.484	0.285844	0.348933	0.637523
AT1G61310.1	1.89	0.227455	0.372077	0.75138	1.815	0.232374	0.366732	0.737191
AT1G07810.1	1.86	0.252045	0.367444	0.705214	1.539	0.231933	0.3198	0.68605
AT1G80500.1	1.498	0.281211	0.36704	0.668116	1.663	0.274216	0.355598	0.662203
AT2G47640.1	1.559	0.287696	0.358114	0.638526	1.509	0.302176	0.363094	0.631549
AT2G47640.2	1.589	0.297052	0.362359	0.629754	1.529	0.301467	0.372257	0.642727
AT2G47640.3	1.575	0.292668	0.360786	0.63371	1.511	0.289409	0.362929	0.649093
AT5G57760.1	1.609	0.274933	0.365193	0.672106	2.313	0.389083	0.539868	0.688695
AT1G68590.1	1.729	0.316365	0.361612	0.605819	1.587	0.352243	0.396727	0.604271
AT1G68590.2	1.725	0.306002	0.369007	0.630663	1.501	0.335042	0.402756	0.633865
AT3G19180.2	2.435	0.209519	0.389828	0.788931	3.266	0.211129	0.430848	0.818134
AT2G18160.1	1.714	0.27593	0.371342	0.677573	3.114	0.331753	0.534846	0.745852
AT1G75510.1	1.447	0.319269	0.352268	0.593251	1.588	0.321583	0.357197	0.595804
AT4G30160.2	1.947	0.250333	0.374384	0.718666	1.872	0.240159	0.354024	0.712198
AT1G68725.1	1.867	0.244481	0.366352	0.718072	1.887	0.282485	0.415015	0.713686
AT1G73230.1	1.494	0.331941	0.35355	0.576814	1.752	0.359747	0.399311	0.594918
AT1G66410.2	2.007	0.311478	0.374987	0.631822	1.945	0.296291	0.374411	0.651817
AT1G66410.1	1.792	0.381878	0.359044	0.521127	1.746	0.366017	0.364894	0.548197
AT1G04430.2	1.692	0.318081	0.363176	0.606056	2.017	0.318939	0.373228	0.616616
AT4G12040.2	1.883	0.218164	0.383943	0.775632	2.877	0.225086	0.393143	0.769071
AT5G07470.1	1.523	0.312537	0.371118	0.625888	1.503	0.272213	0.34288	0.65055
AT4G12040.1	1.672	0.271149	0.372743	0.681494	2.609	0.279363	0.390758	0.68413
AT4G27280.1	1.298	0.336215	0.364036	0.5881	1.871	0.403729	0.471574	0.622103
AT1G32130.2	1.552	0.3109	0.362437	0.618547	1.593	0.286941	0.351189	0.635149
AT1G76800.1	1.88	0.250264	0.375684	0.721764	2.026	0.285525	0.46258	0.749144
AT1G69230.1	1.847	0.209202	0.387579	0.793062	1.3	0.17936	0.311498	0.774901
AT5G38600.1	1.769	0.280533	0.374234	0.673789	1.579	0.274453	0.374608	0.684525
AT5G65310.1	1.663	0.296487	0.360458	0.631529	1.908	0.287367	0.351695	0.639314
AT3G11170.1	1.656	0.343333	0.363871	0.57441	2.498	0.341358	0.389949	0.605487
AT1G26760.1	2.164	0.251543	0.384629	0.723769	2.121	0.249722	0.412716	0.753239
AT1G76820.1	2.103	0.276583	0.372763	0.676454	1.973	0.254143	0.348964	0.681966
AT3G58640.2	1.975	0.243693	0.376437	0.729611	2.173	0.240133	0.393103	0.748291
AT5G53460.2	2.094	0.31532	0.362242	0.609095	1.783	0.293438	0.346507	0.622978
AT3G54400.1	1.789	0.27127	0.371255	0.684575	1.685	0.259892	0.37431	0.705216
AT1G24040.1	2.454	0.245038	0.397329	0.742297	1.918	0.250647	0.40989	0.746306
AT4G35830.1	1.695	0.331316	0.362845	0.587597	1.816	0.356996	0.423018	0.625635
AT4G22140.1	2.172	0.262492	0.387821	0.706262	2.446	0.283103	0.478339	0.762852
AT4G22140.2	2.04	0.285752	0.376068	0.663523	2.204	0.301383	0.437395	0.704983
AT2G33730.1	1.823	0.341091	0.361001	0.572167	1.651	0.317753	0.357958	0.602487
AT3G26782.1	1.663	0.201241	0.367177	0.789768	2.2	0.186904	0.345022	0.789969
AT4G33666.1	1.476	0.277426	0.370034	0.674796	1.475	0.286459	0.34582	0.631572
AT4G21810.1	1.917	0.256909	0.378242	0.710214	1.976	0.263312	0.430001	0.752446
AT5G11260.1	1.835	0.236904	0.383695	0.747774	1.441	0.190271	0.310335	0.752293
AT4G05420.1	1.755	0.274579	0.373006	0.678844	1.99	0.267468	0.398497	0.716917
AT4G05420.2	1.747	0.275294	0.373076	0.678013	1.983	0.268137	0.399101	0.716772
AT3G01540.3	2.014	0.322367	0.361881	0.596082	1.816	0.322477	0.363643	0.60221
AT3G01540.4	1.987	0.324826	0.357539	0.587774	1.817	0.32909	0.368408	0.598967
AT4G18390.1	1.556	0.215839	0.36571	0.764053	1.743	0.192067	0.336753	0.774489
AT3G07950.1	1.965	0.246884	0.38555	0.730391	1.571	0.215639	0.338572	0.737028
AT3G55260.1	1.961	0.268089	0.376682	0.689207	2.089	0.280486	0.407098	0.703835
AT5G56950.1	1.716	0.319757	0.370345	0.614585	2.26	0.345377	0.411821	0.62567
AT3G24120.2	1.724	0.250821	0.367134	0.709285	1.911	0.239244	0.372755	0.73396
AT3G24120.1	1.508	0.278242	0.353124	0.650033	1.648	0.274342	0.360667	0.667889
AT1G50490.1	1.694	0.25653	0.379479	0.717267	1.981	0.274566	0.427984	0.734628
AT1G65470.2	1.905	0.241736	0.371829	0.725297	2.284	0.264723	0.398432	0.717517
AT3G31161.1	1.358	0.505408	0.307778	0.320118	1.98	0.727582	0.423397	0.292883
AT3G23600.1	1.602	0.344056	0.362248	0.569768	1.621	0.309749	0.32608	0.569319
AT1G54050.1	1.604	0.313044	0.367013	0.619312	1.704	0.345728	0.4738	0.688801
AT2G39930.1	2.089	0.263261	0.370868	0.692705	1.819	0.2495	0.385281	0.730775
AT2G38810.3	1.778	0.251123	0.368835	0.713241	2.041	0.253899	0.455439	0.786323
AT2G38810.2	1.738	0.277996	0.373255	0.677418	2.002	0.28224	0.465917	0.757924
AT2G38810.1	1.778	0.252256	0.370772	0.713766	2.017	0.2525	0.450964	0.784816
AT5G38870.1	1.432	0.262677	0.370204	0.697567	1.355	0.304753	0.355494	0.618226
AT4G22320.1	1.659	0.309695	0.367683	0.623212	1.327	0.26853	0.314421	0.618993
AT4G22320.2	1.663	0.300545	0.370499	0.640881	1.341	0.262718	0.32037	0.637153
AT4G23600.1	2.02	0.291496	0.36897	0.647479	1.478	0.22189	0.260426	0.618786
AT1G65280.1	1.435	0.319539	0.351984	0.591093	1.712	0.322353	0.347912	0.585179
AT4G23600.3	2.08	0.27915	0.371284	0.667468	1.495	0.212989	0.261388	0.637633
AT1G13880.1	2.035	0.273657	0.373654	0.680259	1.947	0.261101	0.374578	0.701452
AT3G26510.4	1.812	0.305679	0.37329	0.636854	2.301	0.380829	0.529347	0.688717
AT3G26510.5	1.973	0.232288	0.367082	0.740482	2.521	0.288555	0.50566	0.774421
AT4G15130.1	1.805	0.31387	0.364029	0.609827	1.702	0.308947	0.366782	0.624076
AT3G47370.1	1.598	0.294613	0.369735	0.648294	1.564	0.275131	0.3307	0.629412
AT3G26510.1	1.858	0.276618	0.368585	0.67341	2.375	0.336415	0.507089	0.71969
AT3G26510.2	1.827	0.306886	0.373815	0.63543	2.307	0.384917	0.538453	0.691682
AT3G26510.3	1.915	0.243724	0.370736	0.726857	2.396	0.29556	0.51539	0.77422
AT3G46610.1	1.802	0.286125	0.362667	0.651488	1.725	0.285069	0.369351	0.66148
AT2G15280.2	1.513	0.222619	0.365173	0.754232	1.541	0.213672	0.356421	0.758916
AT2G15280.1	1.519	0.23604	0.366456	0.733285	1.547	0.229871	0.364714	0.741566
AT2G30260.1	1.53	0.312244	0.370373	0.626358	1.687	0.29166	0.386909	0.668596
AT1G12880.1	2.206	0.21883	0.381586	0.763696	2.059	0.209667	0.37149	0.772832
AT4G32570.1	1.775	0.244438	0.36657	0.715307	1.983	0.251119	0.395139	0.736066
AT5G14740.5	1.871	0.311171	0.381509	0.641155	2.265	0.334409	0.451668	0.680316
AT5G65620.1	1.875	0.32291	0.360648	0.596541	2.096	0.353673	0.430112	0.636537
AT1G72250.1	2.439	0.218379	0.384448	0.775491	2.319	0.222163	0.400335	0.783513
AT1G72250.2	2.337	0.228271	0.384959	0.76081	2.246	0.235443	0.406719	0.769843
AT1G14410.1	1.808	0.281892	0.377195	0.674927	1.971	0.309649	0.419369	0.679755
AT2G30200.2	1.597	0.26687	0.364431	0.683607	1.694	0.242229	0.356061	0.714063
AT3G16180.1	1.692	0.256591	0.375553	0.710528	3.015	0.242601	0.421707	0.768007
AT2G30200.1	1.526	0.30734	0.356446	0.613675	1.624	0.282012	0.355663	0.651144
AT1G63120.1	1.626	0.241671	0.380186	0.737215	1.67	0.239306	0.386931	0.746043
AT4G34030.1	1.738	0.302262	0.368967	0.636816	1.915	0.317598	0.414364	0.665272
AT2G41750.1	1.534	0.249187	0.36957	0.712847	1.337	0.217393	0.324579	0.720715
AT4G22930.1	1.93	0.257155	0.375284	0.706847	2.22	0.251863	0.419833	0.757319
AT3G47910.2	1.9	0.265227	0.366484	0.684003	1.613	0.245775	0.334485	0.680789
AT4G37310.1	1.814	0.214671	0.371299	0.770585	1.268	0.183065	0.27751	0.725182
AT3G60380.1	2.167	0.247075	0.376806	0.722129	2.129	0.24234	0.397982	0.751971
AT5G16070.1	1.746	0.283576	0.375536	0.669118	1.884	0.284568	0.386368	0.678699
AT4G33650.2	2.387	0.240065	0.386981	0.741262	2.289	0.218345	0.367507	0.757942
AT1G78570.1	1.714	0.281014	0.363875	0.659451	1.451	0.245413	0.305879	0.646817
AT4G33650.1	2.341	0.242983	0.383182	0.733202	2.228	0.222631	0.36614	0.749954
AT1G27350.1	1.797	0.311042	0.381302	0.635348	1.485	0.259662	0.33924	0.66093
AT5G64360.4	1.851	0.270262	0.379521	0.691302	2.157	0.271706	0.419604	0.727744
AT5G64360.3	1.795	0.272395	0.374323	0.682028	2.133	0.273014	0.426034	0.732641
AT5G64360.2	1.922	0.261097	0.380475	0.704886	2.252	0.254428	0.423955	0.756696
AT5G64360.1	2.047	0.25337	0.388248	0.723902	2.4	0.243454	0.42855	0.773878
AT2G30950.1	1.534	0.391286	0.353263	0.505405	1.879	0.39889	0.392578	0.542226
AT1G18700.2	1.853	0.219407	0.370073	0.762737	1.781	0.212605	0.369482	0.772849
AT1G18700.3	1.781	0.225769	0.366649	0.749474	1.722	0.224048	0.370379	0.75586
AT1G18700.1	1.791	0.231782	0.371474	0.744689	1.712	0.222165	0.363695	0.751918
AT1G68190.1	1.953	0.274639	0.369792	0.676818	3.088	0.313579	0.506383	0.74127
AT1G18700.4	1.789	0.227239	0.37031	0.750998	1.711	0.217945	0.362563	0.757881
AT1G53885.1	1.672	0.251339	0.373731	0.714237	1.527	0.255804	0.398959	0.73715
AT5G63840.1	1.749	0.276488	0.364282	0.667725	1.484	0.258463	0.333421	0.658978
AT3G10040.1	1.95	0.244743	0.382858	0.736101	2.495	0.303742	0.517705	0.767498
AT1G69250.1	1.747	0.235992	0.368914	0.734786	1.754	0.232864	0.365502	0.735416
AT1G69250.2	1.789	0.219874	0.36757	0.758802	1.798	0.217365	0.361268	0.755392
AT3G03460.1	1.568	0.230131	0.378504	0.753882	1.301	0.200183	0.308429	0.731867
AT3G58670.1	1.653	0.241982	0.387535	0.742363	1.832	0.233626	0.372896	0.743316
AT1G72640.2	2.018	0.341653	0.370118	0.579631	2.423	0.381831	0.487086	0.651909
AT3G11630.1	1.613	0.402641	0.336297	0.467445	1.871	0.415158	0.390464	0.520143
AT2G47840.1	1.633	0.294289	0.365444	0.642718	1.512	0.292488	0.374604	0.653661
AT2G19450.1	1.862	0.233579	0.376624	0.744334	2.208	0.228003	0.399387	0.772687
AT3G54090.1	1.662	0.346953	0.351207	0.554031	1.571	0.340471	0.359583	0.575621
AT2G33770.1	1.833	0.26639	0.371222	0.689836	2.017	0.253475	0.374269	0.713444
AT3G59310.1	2.222	0.222683	0.379561	0.763622	2.552	0.251119	0.469235	0.793617
AT5G53770.1	1.636	0.268958	0.371656	0.688766	2.193	0.254101	0.370697	0.70753
AT5G39350.1	1.771	0.228994	0.369348	0.744192	1.892	0.246867	0.384214	0.730697
AT1G08180.1	1.464	0.254835	0.375216	0.714768	1.568	0.256524	0.375208	0.712876
AT5G57930.1	1.884	0.305138	0.369537	0.628911	1.512	0.291072	0.354152	0.636309
AT5G57930.2	1.884	0.314913	0.365793	0.60915	1.525	0.302603	0.355925	0.621252
AT5G52370.1	1.551	0.28995	0.362968	0.647946	1.247	0.262418	0.313873	0.627854
AT1G20510.1	1.56	0.321549	0.362374	0.601846	2.264	0.340612	0.408685	0.627156
AT1G20510.2	1.62	0.306821	0.363378	0.624552	2.352	0.325788	0.410233	0.649242
AT5G14570.1	2.081	0.22773	0.38201	0.758699	1.693	0.216598	0.354667	0.750789
AT1G25450.1	1.699	0.272722	0.371419	0.682374	1.739	0.27114	0.3942	0.708431
AT2G17530.2	1.977	0.23962	0.376062	0.73595	1.796	0.211043	0.343877	0.749505
AT5G09740.1	1.643	0.318845	0.375342	0.621546	1.987	0.330184	0.399728	0.630339
AT2G44620.1	1.553	0.284647	0.359893	0.651946	1.369	0.273406	0.358328	0.668972
AT4G35110.4	2.051	0.229033	0.379662	0.755761	2.012	0.21514	0.338449	0.733918
AT4G35110.3	2.078	0.226777	0.383384	0.762261	2.011	0.208106	0.333963	0.742764
AT4G35110.2	2.069	0.227268	0.383193	0.76137	1.994	0.207808	0.331081	0.739797
AT4G35110.1	2.078	0.222946	0.381634	0.766636	2.007	0.206335	0.331372	0.742725
AT2G42590.3	1.449	0.300081	0.354088	0.621407	1.769	0.306326	0.382581	0.646093
AT2G42590.2	1.509	0.317756	0.346162	0.583594	1.702	0.327669	0.382035	0.616244
AT2G42590.1	1.479	0.31668	0.343027	0.580672	1.662	0.326318	0.374677	0.609391
AT4G26640.2	1.776	0.249863	0.368909	0.713715	1.679	0.242432	0.349757	0.704332
AT1G16880.2	1.648	0.32589	0.3684	0.602269	1.601	0.310079	0.384833	0.64623
AT1G16880.1	1.853	0.346782	0.36336	0.565902	1.404	0.336672	0.364264	0.587014
AT2G27450.2	1.762	0.243377	0.373075	0.729024	2.264	0.260279	0.409986	0.736811
AT4G09180.1	1.681	0.287218	0.371008	0.659027	1.334	0.244615	0.310134	0.652261
AT5G46390.2	2.288	0.260386	0.382786	0.704872	1.91	0.260706	0.416882	0.743884
AT1G28420.1	2.623	0.249658	0.378492	0.718404	2.308	0.244224	0.366858	0.718343
AT5G46390.1	2.304	0.246719	0.38122	0.725161	1.905	0.248405	0.410785	0.755889
AT2G21620.2	1.742	0.301139	0.369911	0.638403	1.522	0.256736	0.322451	0.648937
AT4G35100.1	1.676	0.36027	0.360361	0.544999	1.531	0.372431	0.377639	0.557563
AT4G35100.2	1.713	0.333314	0.367499	0.589294	1.556	0.350763	0.38572	0.594164
AT2G21620.1	1.64	0.319436	0.361292	0.603533	1.453	0.279369	0.322223	0.613362
AT4G00950.1	1.534	0.293434	0.367646	0.649397	1.736	0.296877	0.389662	0.667902
AT1G32790.1	1.706	0.29636	0.372245	0.650999	1.562	0.281727	0.368644	0.668175
AT4G00090.1	1.729	0.274747	0.367523	0.674698	1.734	0.239238	0.330594	0.686257
AT1G29970.1	1.441	0.255701	0.366806	0.703892	1.821	0.23064	0.4014	0.774388
AT3G18000.1	1.894	0.281156	0.37963	0.677171	1.197	0.241617	0.286208	0.625284
AT1G29970.2	1.407	0.280543	0.356419	0.65309	1.722	0.254769	0.361847	0.698189
AT5G57700.3	1.616	0.254092	0.369474	0.707764	1.684	0.253222	0.378189	0.715895
AT5G57700.2	1.629	0.247262	0.364749	0.712436	1.704	0.245341	0.375599	0.725006
AT5G57700.1	1.64	0.239089	0.366599	0.72839	1.703	0.238066	0.373337	0.734396
AT2G02230.1	1.578	0.34489	0.367556	0.577473	1.73	0.343482	0.4036	0.616836
AT5G10870.1	1.852	0.250843	0.371137	0.714738	1.524	0.232588	0.34853	0.719771
AT5G57700.4	1.601	0.256681	0.368539	0.70287	1.668	0.256545	0.37751	0.710122
AT1G29950.2	1.65	0.217502	0.363711	0.760904	1.782	0.210289	0.357032	0.764478
AT1G29950.1	1.606	0.229133	0.361419	0.739744	1.719	0.220675	0.357016	0.746315
AT3G07060.1	2.284	0.202745	0.390439	0.800641	2.422	0.195294	0.39987	0.819173
AT1G64140.1	1.734	0.290434	0.362238	0.643405	1.539	0.271463	0.334319	0.639061
AT1G19010.1	2.092	0.267955	0.385702	0.701528	2.084	0.24725	0.378237	0.723502
AT4G33630.1	1.606	0.313938	0.365519	0.618147	1.638	0.311755	0.375736	0.632638
AT4G33630.2	1.637	0.309844	0.367399	0.625793	1.683	0.310764	0.380787	0.639408
AT3G51420.1	1.945	0.306153	0.370305	0.631538	2.091	0.305258	0.39054	0.656634
AT3G48760.1	1.553	0.297751	0.364763	0.638664	1.798	0.301563	0.384614	0.653371
AT1G17880.1	1.978	0.328638	0.356859	0.580269	1.725	0.317296	0.380459	0.627658
AT1G36980.1	1.831	0.278837	0.367749	0.667528	1.757	0.270081	0.354818	0.66527
AT5G62190.1	1.624	0.345379	0.358564	0.565437	1.641	0.320193	0.340209	0.575369
AT2G38950.1	2.006	0.243416	0.372262	0.726519	1.828	0.242365	0.362902	0.718101
AT1G32220.1	2.044	0.297527	0.377585	0.650111	1.896	0.305138	0.407606	0.673768
AT4G24830.2	1.738	0.255375	0.361318	0.695421	2.055	0.25973	0.399528	0.728581
AT5G10660.2	7	0.20161	1.11366	0.970441	7	0.330134	1.45469	0.95259
AT2G14120.1	2.113	0.258579	0.373668	0.703236	1.901	0.268138	0.376014	0.693434
AT4G17330.1	1.885	0.274926	0.376942	0.681971	1.934	0.266924	0.374833	0.692022
AT2G14120.2	2.116	0.257226	0.373245	0.704782	1.898	0.266901	0.374583	0.693737
AT1G07350.1	1.743	0.254725	0.372072	0.710636	1.616	0.220246	0.31812	0.705995
AT4G02890.1	1.527	0.336038	0.362032	0.583122	1.537	0.290507	0.335454	0.615857
AT4G02890.2	1.543	0.31807	0.36027	0.60476	1.227	0.281108	0.322844	0.613743
AT1G09760.1	1.62	0.282509	0.375429	0.674884	1.659	0.281464	0.370413	0.670008
AT4G02890.4	1.487	0.343655	0.354717	0.56487	1.556	0.303878	0.331562	0.589984
AT3G26980.1	1.984	0.243651	0.370299	0.724351	1.917	0.28097	0.445675	0.742795
AT2G41231.1	7	0.209385	1.13351	0.969042	7	0.314103	1.44916	0.955128
AT3G17120.2	1.9	0.210024	0.374392	0.780131	1.463	0.186386	0.308153	0.757915
AT1G74510.1	2.219	0.240513	0.384553	0.739148	1.86	0.220076	0.342354	0.730696
AT5G25280.1	2.102	0.28563	0.37908	0.668285	2.2	0.320648	0.42183	0.666095
AT1G74510.2	2.296	0.213435	0.383927	0.781578	1.921	0.196007	0.343013	0.774109
AT5G13810.1	1.855	0.243518	0.377036	0.731411	1.543	0.218107	0.330066	0.722213
AT4G09890.1	1.518	0.307184	0.377009	0.638633	1.522	0.294682	0.389095	0.672374
AT4G27990.1	1.585	0.275314	0.367885	0.673674	1.39	0.236645	0.303189	0.659363
AT1G22690.1	1.447	0.303399	0.356133	0.617989	2.262	0.35707	0.514462	0.704248
AT3G52850.1	1.835	0.325667	0.362009	0.594437	1.785	0.303801	0.332144	0.586849
AT1G74910.1	1.473	0.269232	0.356922	0.673254	2.143	0.299159	0.429775	0.703212
AT3G04730.1	1.531	0.27449	0.362011	0.670905	2.047	0.313734	0.436908	0.690041
AT1G74910.3	1.489	0.26971	0.359579	0.675282	2.049	0.300378	0.429369	0.701904
AT1G74910.2	1.46	0.27068	0.356643	0.670977	2.127	0.301418	0.429718	0.700281
AT1G51720.1	1.643	0.285071	0.365593	0.655706	1.808	0.292162	0.392563	0.675237
AT2G44360.1	1.993	0.295484	0.376164	0.647875	1.972	0.31491	0.416419	0.666745
AT2G44680.1	1.942	0.244446	0.370968	0.722555	1.828	0.239792	0.374953	0.732032
AT5G03540.1	2.115	0.286212	0.373257	0.664165	1.705	0.3017	0.384629	0.655805
AT5G03540.2	2.142	0.271376	0.37331	0.686403	1.73	0.288833	0.387014	0.676878
AT2G44680.2	1.951	0.235877	0.368862	0.734093	1.851	0.238017	0.37346	0.732346
AT5G05950.1	2.223	0.235188	0.398894	0.759163	2.172	0.218131	0.387703	0.774499
AT3G43300.1	1.855	0.256144	0.369563	0.703141	1.761	0.239862	0.357708	0.71693
AT4G38490.1	1.854	0.234564	0.367531	0.735826	1.792	0.236494	0.373556	0.737223
AT5G60390.2	1.547	0.350436	0.34261	0.534908	1.546	0.3493	0.361052	0.566685
AT3G46670.1	1.898	0.254807	0.384925	0.717575	1.144	0.189185	0.244105	0.660472
AT1G30580.1	1.63	0.322687	0.359323	0.595634	1.55	0.326644	0.363223	0.599407
AT4G16950.1	1.697	0.297037	0.367124	0.641817	2.637	0.345554	0.474767	0.683513
AT5G60390.3	1.568	0.372853	0.338488	0.503022	1.575	0.382033	0.365389	0.532652
AT1G75760.1	1.754	0.250371	0.381575	0.723155	1.851	0.226098	0.350472	0.731155
AT5G42000.2	1.685	0.287243	0.379904	0.669765	1.527	0.278707	0.39443	0.699432
AT5G45710.2	2.134	0.204338	0.381768	0.796363	2.267	0.199295	0.388993	0.808629
AT4G34090.1	1.723	0.217792	0.365808	0.762895	2.33	0.241677	0.43816	0.785676
AT4G34090.3	1.497	0.277447	0.365395	0.670675	2.14	0.290764	0.440982	0.722069
AT4G34090.2	1.763	0.217528	0.366019	0.763452	2.285	0.241375	0.433895	0.783152
AT5G45710.1	2.12	0.21407	0.383827	0.782565	2.27	0.209052	0.395372	0.798807
AT5G20280.1	1.664	0.327951	0.361572	0.593404	1.563	0.312297	0.349197	0.599101
AT2G43770.1	1.976	0.274957	0.373228	0.675579	2.183	0.275587	0.421727	0.727053
AT2G39720.1	1.8	0.251206	0.369476	0.710228	1.706	0.223732	0.334814	0.715173
AT3G53670.1	1.579	0.250334	0.363762	0.708442	1.646	0.238758	0.389193	0.750881
AT3G53670.2	1.618	0.233419	0.362635	0.734206	1.691	0.228686	0.389748	0.765898
AT3G50910.1	1.846	0.255564	0.381038	0.714363	1.431	0.192326	0.275273	0.700328
AT3G57230.2	1.56	0.224208	0.370971	0.758038	1.566	0.195648	0.332094	0.763438
AT4G36870.1	1.989	0.25678	0.369118	0.701491	1.867	0.243306	0.34926	0.701615
AT4G36870.2	2.014	0.253821	0.370665	0.708029	1.861	0.238361	0.344059	0.703778
AT1G11790.1	1.784	0.238175	0.377261	0.738368	1.911	0.221879	0.371164	0.759914
AT3G06070.1	1.506	0.316857	0.367823	0.617675	2.447	0.364706	0.508039	0.691946
AT2G06510.2	1.827	0.24503	0.379768	0.730043	1.473	0.22225	0.3265	0.711229
AT1G24180.1	1.539	0.288872	0.36066	0.644384	1.582	0.290823	0.358737	0.641316
AT1G59710.1	2.043	0.210467	0.379075	0.785149	1.853	0.204992	0.359835	0.774253
AT3G01710.1	1.687	0.261442	0.382194	0.708504	2.123	0.285892	0.425636	0.713477
AT5G10180.1	1.716	0.304876	0.362601	0.625484	1.607	0.267292	0.336426	0.649303
AT3G01710.2	1.751	0.263669	0.38631	0.708771	2.054	0.288367	0.426009	0.711986
AT3G51830.1	2.007	0.252019	0.373261	0.710921	2.074	0.25837	0.379059	0.710849
AT5G12040.2	2.076	0.237051	0.378082	0.738999	2.043	0.238914	0.367781	0.727813
AT4G02200.1	1.981	0.244945	0.379646	0.728922	2.737	0.251776	0.473482	0.795349
AT1G17145.1	1.551	0.283951	0.369739	0.663607	1.752	0.291467	0.403766	0.688703
AT4G02200.3	2.068	0.22382	0.381533	0.762676	2.821	0.231291	0.472697	0.820463
AT5G57815.1	1.862	0.289723	0.373827	0.655404	1.586	0.279172	0.368904	0.668336
AT2G30520.3	1.749	0.246518	0.374355	0.724391	2.262	0.25145	0.419457	0.756961
AT2G30520.2	1.799	0.23615	0.375857	0.742271	2.35	0.240352	0.421737	0.774376
AT2G30520.1	1.704	0.261403	0.372563	0.699782	2.251	0.268831	0.427374	0.739027
AT1G08420.2	2.098	0.257321	0.372102	0.703708	2.224	0.251803	0.362568	0.701326
AT5G53800.1	1.511	0.365987	0.350111	0.52963	1.338	0.329828	0.287391	0.489426
AT1G08420.1	2.047	0.268949	0.369392	0.682766	2.173	0.263002	0.360683	0.681547
AT4G26965.2	2.086	0.2316	0.385283	0.756016	2.134	0.215408	0.364577	0.760073
AT4G26965.1	2.136	0.22976	0.37952	0.75355	2.151	0.21394	0.37901	0.776584
AT3G05880.1	1.338	0.346995	0.356927	0.562104	1.199	0.311492	0.329735	0.574899
AT5G48630.1	1.826	0.278462	0.368624	0.665997	1.46	0.257577	0.34676	0.679287
AT2G34585.1	1.389	0.280717	0.361238	0.660035	1.683	0.263415	0.350832	0.661323
AT5G48230.1	1.714	0.251634	0.369548	0.711724	2.267	0.24473	0.391689	0.74365
AT4G24330.1	2.056	0.294891	0.371363	0.647476	1.795	0.276663	0.35532	0.65548
AT3G12955.1	3.112	0.125829	0.458897	0.933648	2.752	0.188635	0.487815	0.87885
AT4G03415.2	1.748	0.268176	0.364484	0.681149	2.02	0.286171	0.396878	0.688824
AT2G30530.1	1.65	0.241201	0.373643	0.729839	1.896	0.230412	0.356518	0.726077
AT4G03415.1	1.734	0.269035	0.364775	0.680711	1.989	0.293589	0.394151	0.675654
AT5G02290.2	1.574	0.307785	0.36787	0.627627	1.776	0.343682	0.431072	0.648909
AT3G09770.1	1.782	0.289167	0.363653	0.647503	2.134	0.288066	0.369513	0.652774
AT1G50300.1	1.664	0.316795	0.368724	0.612755	1.789	0.314226	0.398408	0.652034
AT3G12600.2	1.686	0.295282	0.361771	0.632335	1.414	0.304248	0.386752	0.657035
AT3G12600.1	1.776	0.295906	0.363968	0.632231	1.492	0.303261	0.390439	0.66174
AT1G45231.2	1.862	0.255803	0.372448	0.706872	1.761	0.239819	0.347682	0.70433
AT4G24470.2	1.974	0.227853	0.384661	0.75977	1.89	0.225782	0.376609	0.756279
AT4G24470.3	2.033	0.214851	0.384615	0.780137	1.892	0.220689	0.375378	0.763572
AT4G24470.1	1.955	0.233464	0.385088	0.751718	1.805	0.233863	0.365304	0.732202
AT5G01460.1	1.995	0.240406	0.375948	0.733664	2.058	0.252537	0.431574	0.765335
AT5G11680.1	1.628	0.289274	0.361018	0.645427	1.606	0.268285	0.361908	0.677692
AT1G17980.2	2.19	0.233763	0.377887	0.741822	2.247	0.244413	0.401456	0.750365
AT5G17630.1	1.809	0.235655	0.37013	0.737721	1.568	0.21016	0.327925	0.734399
AT1G69060.1	2.156	0.236735	0.367579	0.729851	2.007	0.232931	0.367927	0.736214
AT3G15660.1	1.96	0.312666	0.379281	0.634127	1.738	0.296526	0.376151	0.651086
AT2G48160.1	1.878	0.273708	0.370199	0.677369	1.857	0.266091	0.358713	0.676973
AT1G53210.1	1.746	0.291406	0.366163	0.649419	1.775	0.259976	0.338781	0.660921
AT3G15660.2	1.967	0.315409	0.382685	0.634132	1.765	0.302093	0.383587	0.652027
AT3G02060.1	1.882	0.285913	0.374575	0.666328	1.882	0.275697	0.378674	0.683865
AT1G16410.1	2.01	0.28379	0.369615	0.660507	3.501	0.38865	0.600504	0.729841
AT1G16410.2	1.927	0.280789	0.371519	0.669522	3.261	0.38094	0.588727	0.73153
AT5G14430.1	1.747	0.273051	0.365935	0.673662	2.323	0.285211	0.427339	0.717452
AT5G14430.2	1.749	0.269211	0.366005	0.679614	2.329	0.280737	0.425804	0.722048
AT5G59880.2	1.703	0.329064	0.349536	0.57138	1.716	0.313431	0.339396	0.581354
AT1G79080.1	1.919	0.27885	0.365135	0.664562	1.711	0.252954	0.334443	0.668261
AT4G33480.1	1.518	0.307773	0.367157	0.62859	1.767	0.285181	0.359	0.649113
AT3G47370.2	1.607	0.286206	0.371848	0.662348	1.407	0.275509	0.343506	0.645735
AT1G16470.2	1.793	0.217405	0.359396	0.755914	1.756	0.227393	0.392193	0.771654
AT5G64880.1	1.482	0.268194	0.365002	0.684393	1.998	0.263568	0.413229	0.738208
AT1G16470.1	1.717	0.2531	0.358101	0.695736	1.665	0.256992	0.388844	0.723621
AT3G52720.2	1.748	0.221293	0.380224	0.770501	1.782	0.229305	0.396922	0.773654
AT5G50210.1	1.828	0.252702	0.376429	0.715837	2.353	0.239012	0.356882	0.713975
AT1G29890.1	2.03	0.220969	0.368624	0.758663	1.757	0.186798	0.315647	0.762085
AT5G09443.1	1.566	0.255708	0.363552	0.695768	1.643	0.218693	0.343759	0.735004
AT1G78210.1	1.629	0.255482	0.371289	0.706885	1.873	0.246815	0.384345	0.734858
AT3G14980.1	2.086	0.240163	0.369808	0.727366	2.184	0.228523	0.350689	0.724684
AT2G47910.1	1.341	0.34257	0.364009	0.579773	1.599	0.319094	0.372475	0.620244
AT2G47910.2	1.394	0.299423	0.364999	0.63909	1.653	0.281833	0.370429	0.67013
AT1G42990.1	1.638	0.27727	0.372237	0.676283	1.263	0.224904	0.294754	0.666051
AT1G31150.1	1.952	0.205786	0.383314	0.792126	2.141	0.199684	0.387393	0.806814
AT1G04300.3	1.848	0.287358	0.367482	0.656904	1.92	0.281849	0.362721	0.661113
AT1G04300.2	1.869	0.280485	0.369335	0.669352	1.942	0.275107	0.364329	0.673146
AT3G16370.1	1.93	0.308419	0.367386	0.622265	1.936	0.304446	0.367884	0.629285
AT1G51570.1	1.693	0.310397	0.355423	0.60551	1.793	0.327525	0.381026	0.613414
AT5G48180.1	1.596	0.374444	0.363101	0.536696	1.007	0.267926	0.246659	0.516869
AT5G64220.1	2.093	0.22605	0.383787	0.760055	1.974	0.219084	0.37096	0.761599
AT2G40430.2	1.585	0.292229	0.35508	0.634917	1.567	0.293538	0.355804	0.634804
AT2G40430.3	1.55	0.31178	0.354726	0.606741	1.541	0.311528	0.360938	0.615946
AT5G43020.1	2.188	0.209339	0.381636	0.785057	2.285	0.226455	0.412465	0.787676
AT2G40430.1	1.568	0.308968	0.354274	0.609774	1.562	0.309486	0.357022	0.613025
AT2G16405.1	1.744	0.230692	0.375987	0.749515	1.861	0.221602	0.363833	0.751365
AT5G42100.2	1.792	0.298	0.367394	0.642481	1.947	0.291454	0.405245	0.690872
AT5G42100.1	1.802	0.307244	0.366523	0.628094	1.959	0.302414	0.408499	0.678412
AT3G16310.1	1.605	0.284441	0.367652	0.660686	2.044	0.284255	0.390893	0.682582
AT1G07720.1	1.841	0.295845	0.373392	0.651612	1.231	0.228616	0.28796	0.651075
AT5G58470.2	1.652	0.29295	0.369895	0.650767	1.62	0.279361	0.360394	0.659936
AT5G63670.1	1.345	0.309189	0.360163	0.617878	1.468	0.324764	0.396423	0.63793
AT3G54640.1	1.835	0.242276	0.366896	0.72479	1.796	0.252784	0.414732	0.753772
AT5G63670.2	1.453	0.231019	0.360301	0.737655	1.57	0.22434	0.36591	0.75284
AT3G52520.1	1.611	0.276657	0.354926	0.654647	1.89	0.339568	0.455221	0.676834
AT5G54250.1	1.968	0.236879	0.375824	0.737219	1.727	0.219326	0.330484	0.718113
AT5G54250.2	2.008	0.222808	0.373824	0.757606	1.761	0.206514	0.329502	0.740101
AT5G54250.3	2.006	0.226965	0.376996	0.754053	1.752	0.21114	0.330112	0.732134
AT2G40410.1	1.901	0.265425	0.369489	0.687275	1.765	0.27232	0.39088	0.703887
AT2G40410.2	1.876	0.267699	0.368428	0.682948	1.87	0.275575	0.39748	0.70588
AT3G58970.1	2.128	0.25469	0.375205	0.710862	1.792	0.236888	0.337724	0.697662
AT1G25250.1	1.706	0.259587	0.366362	0.69771	1.322	0.217748	0.315374	0.708363
AT5G05060.1	1.951	0.262428	0.372117	0.698896	1.524	0.232446	0.337051	0.708646
AT2G38310.1	1.677	0.30749	0.364404	0.622821	2.428	0.368582	0.551659	0.720074
AT3G55630.3	1.847	0.281818	0.374092	0.666916	1.898	0.278665	0.383031	0.686403
AT1G58180.1	1.431	0.303926	0.357348	0.620271	1.762	0.332783	0.42988	0.661859
AT3G55630.1	1.843	0.268213	0.379401	0.693529	1.989	0.258976	0.385453	0.717103
AT1G58180.3	1.712	0.293132	0.362254	0.642388	1.816	0.31801	0.430613	0.679597
AT1G58180.4	1.631	0.302544	0.356501	0.62101	1.758	0.340889	0.432462	0.653413
AT2G36790.1	2.649	0.181399	0.38453	0.830029	1.598	0.157212	0.296212	0.797175
AT2G34430.1	1.911	0.411591	0.349847	0.477441	3.56	0.602576	0.67061	0.596863
AT3G27010.1	1.513	0.209798	0.360131	0.770974	1.482	0.207188	0.340203	0.753281
AT1G54580.1	1.832	0.286331	0.369827	0.658279	1.785	0.269677	0.362811	0.677279
AT2G01820.1	1.606	0.254663	0.369032	0.706081	2.089	0.259576	0.41581	0.744593
AT1G26830.1	1.597	0.314193	0.361119	0.610699	1.903	0.325856	0.375892	0.610973
AT2G47160.1	1.938	0.218462	0.377942	0.769228	1.91	0.214252	0.368002	0.766929
AT1G51140.1	1.822	0.249074	0.366207	0.712441	0.965	0.165256	0.202918	0.63904
AT2G47160.2	1.964	0.212479	0.37844	0.779173	1.933	0.209156	0.368551	0.775953
AT5G12210.2	1.569	0.273388	0.366841	0.677528	1.684	0.23367	0.343266	0.711625
AT5G55610.2	1.82	0.248698	0.376947	0.724573	1.734	0.233674	0.353876	0.72207
AT5G55610.1	1.73	0.275067	0.379258	0.687083	1.662	0.262289	0.364074	0.689106
AT5G12210.1	1.566	0.273841	0.366718	0.676777	1.672	0.23538	0.34153	0.706712
AT5G13730.1	1.371	0.36563	0.356537	0.541549	1.843	0.358727	0.355905	0.545999
AT1G20850.1	1.583	0.283935	0.36746	0.663028	1.506	0.275886	0.342008	0.642419
AT1G22160.1	1.716	0.258807	0.382113	0.714817	1.292	0.216167	0.320655	0.717595
AT2G18570.1	2.179	0.235835	0.375667	0.734917	1.88	0.229085	0.381639	0.754632
AT1G14380.2	1.928	0.252471	0.379265	0.71926	1.767	0.23037	0.354786	0.729152
AT1G14380.3	2.041	0.257569	0.375708	0.708055	1.641	0.245533	0.354149	0.704279
AT1G74970.1	1.914	0.353638	0.358212	0.549389	1.96	0.38743	0.438934	0.60526
AT1G14380.1	2.041	0.2574	0.374152	0.706439	1.641	0.243337	0.353217	0.706918
AT1G47530.1	1.763	0.28348	0.359773	0.649449	1.594	0.26981	0.353494	0.663112
AT3G16660.1	1.546	0.27944	0.36872	0.668473	3.08	0.324402	0.568085	0.774611
AT3G02680.1	2.476	0.191892	0.391668	0.818637	1.958	0.171045	0.345841	0.81868
AT3G62700.1	1.822	0.258761	0.372009	0.704004	1.8	0.242406	0.3394	0.690537
AT2G42910.1	1.463	0.288432	0.367502	0.656829	1.428	0.266072	0.352095	0.671241
AT4G02590.1	1.588	0.277833	0.360674	0.658894	1.466	0.246981	0.320865	0.662239
AT3G62650.2	1.636	0.294706	0.375202	0.65746	1.985	0.313202	0.427704	0.683843
AT5G55600.2	1.763	0.284857	0.374215	0.665483	1.856	0.253201	0.356799	0.693627
AT5G24530.1	1.821	0.235226	0.376539	0.744709	1.253	0.199601	0.272926	0.685489
AT4G08555.1	1.538	0.187826	0.368743	0.812934	0.778	0.109416	0.185691	0.766279
AT3G03140.1	1.909	0.265161	0.377342	0.696096	1.762	0.240987	0.347979	0.704344
AT5G58900.1	1.958	0.257285	0.375062	0.705535	2.466	0.295654	0.502024	0.764024
AT1G23440.1	1.596	0.291428	0.375965	0.656979	1.248	0.250389	0.334825	0.676572
AT4G27720.1	1.614	0.247931	0.362584	0.711656	1.521	0.237442	0.350954	0.714302
AT2G24570.1	1.888	0.217374	0.370209	0.764327	1.875	0.214789	0.35471	0.753566
AT3G61020.1	2.721	0.182549	0.404163	0.840959	3.502	0.191779	0.45089	0.855626
AT3G28300.1	1.702	0.304487	0.361234	0.624264	1.489	0.269627	0.298308	0.594566
AT3G44330.1	1.63	0.234537	0.367309	0.735182	1.552	0.203036	0.327686	0.746661
AT2G22010.1	2.4	0.232184	0.393251	0.75658	2.45	0.227915	0.393877	0.76007
AT2G22010.2	2.514	0.204853	0.388959	0.795642	2.565	0.202394	0.389409	0.796335
AT4G00630.1	2.009	0.272046	0.37654	0.685606	1.674	0.253641	0.349927	0.687895
AT4G27740.1	1.361	0.286405	0.360929	0.651476	1.664	0.309636	0.419553	0.678769
AT4G12917.1	1.509	0.227047	0.35848	0.739144	1.392	0.170819	0.304041	0.782558
AT1G15480.1	1.968	0.253574	0.379463	0.715224	2.841	0.268658	0.453947	0.755997
AT1G75440.1	1.678	0.237	0.362669	0.727238	1.979	0.248585	0.428723	0.770374
AT3G50970.1	1.835	0.259093	0.376439	0.705407	0.51	0.110106	0.113341	0.564294
AT2G38640.1	1.673	0.250368	0.368759	0.714682	1.557	0.247843	0.35714	0.705838
AT3G45260.1	1.565	0.266511	0.358349	0.679009	1.508	0.279344	0.381981	0.687539
AT4G00355.1	1.761	0.275939	0.376692	0.681607	1.811	0.268842	0.386276	0.702371
AT4G00355.2	1.775	0.280255	0.37984	0.678623	1.813	0.274683	0.387039	0.694317
AT4G00355.3	1.814	0.260446	0.379299	0.7082	1.868	0.249935	0.389227	0.733906
AT4G00355.4	1.869	0.254629	0.375517	0.71251	1.851	0.24875	0.376504	0.720905
AT3G61060.1	1.756	0.226614	0.373943	0.753132	2.384	0.257994	0.463699	0.777951
AT3G45240.3	1.799	0.23192	0.368734	0.739346	1.7	0.233883	0.382904	0.750409
AT3G45240.2	1.745	0.231505	0.363377	0.735154	1.659	0.230855	0.374231	0.747287
AT3G48360.1	1.626	0.356417	0.349643	0.537621	2.612	0.43556	0.542932	0.645547
AT3G26710.1	1.577	0.304409	0.354189	0.615211	1.804	0.301096	0.38389	0.65677
AT3G14930.2	2.027	0.320427	0.361673	0.60255	2.162	0.375077	0.452453	0.633123
AT5G17160.1	2.013	0.263828	0.372396	0.69537	1.812	0.27245	0.383352	0.695644
AT3G21140.1	1.88	0.253412	0.372697	0.711767	1.598	0.233901	0.373046	0.743901
AT5G08470.1	2.043	0.239058	0.385414	0.744247	2.316	0.241467	0.394665	0.748439
AT1G26620.1	2.352	0.222083	0.383783	0.768346	2.289	0.18759	0.319098	0.757989
AT2G17350.1	1.502	0.392183	0.356966	0.50847	1.793	0.421969	0.416644	0.543209
AT1G78020.1	1.72	0.288828	0.360341	0.642731	1.581	0.260303	0.342478	0.665534
AT5G43720.1	1.613	0.278174	0.364095	0.665663	2.072	0.282285	0.389327	0.68717
AT1G50020.1	1.385	0.276071	0.367037	0.674367	1.72	0.252347	0.367079	0.707951
AT3G50210.2	1.645	0.253772	0.36096	0.699354	1.931	0.2826	0.437373	0.732387
AT3G50210.3	1.586	0.266649	0.361538	0.681087	1.868	0.291967	0.430435	0.713799
AT5G20680.2	2.228	0.23928	0.368082	0.725445	1.911	0.214701	0.34114	0.738298
AT3G57530.1	1.714	0.338096	0.361774	0.580531	2.172	0.37301	0.45167	0.634363
AT5G03710.1	1.279	0.351801	0.461494	0.648925	2.092	0.379353	0.449852	0.603522
AT3G07700.3	1.721	0.266666	0.37002	0.689935	1.292	0.226086	0.324227	0.705207
AT3G20100.1	1.567	0.239535	0.368651	0.729619	1.281	0.191005	0.258321	0.6802
AT2G17340.1	1.61	0.282331	0.36739	0.663587	1.645	0.274425	0.372783	0.682789
AT3G43720.1	1.377	0.319278	0.353414	0.594336	1.58	0.315861	0.40264	0.655249
AT2G30140.1	2.141	0.240422	0.376071	0.729222	1.228	0.185556	0.240687	0.658368
AT2G30140.2	2.14	0.239391	0.376429	0.73154	1.225	0.185514	0.240079	0.657251
AT5G56750.1	1.668	0.244336	0.36887	0.72185	1.625	0.223965	0.313401	0.69074
AT4G38225.3	2.036	0.288978	0.382557	0.668114	1.904	0.296137	0.432436	0.711039
AT4G38225.2	1.971	0.286125	0.375331	0.660499	2.117	0.290791	0.414968	0.698601
AT4G38225.1	1.932	0.30735	0.374233	0.629226	2.086	0.315988	0.421175	0.671531
AT3G05730.1	1.314	0.329597	0.335662	0.555294	3.532	0.563863	0.719059	0.652502
AT5G53940.1	1.412	0.315769	0.360965	0.608468	1.575	0.338457	0.391306	0.610355
AT5G03730.2	1.925	0.264023	0.36402	0.683451	1.901	0.244098	0.354514	0.705525
AT5G03730.1	1.913	0.265242	0.364562	0.682637	1.918	0.246015	0.357204	0.705004
AT3G18535.1	1.806	0.280541	0.355743	0.648761	2.11	0.288038	0.422429	0.70697
AT3G02720.1	1.718	0.268702	0.366107	0.681063	1.824	0.281314	0.374425	0.672784
AT5G56740.1	2.018	0.230733	0.371946	0.746177	2.466	0.22736	0.382439	0.75788
AT5G49015.2	1.507	0.294785	0.358618	0.634306	1.837	0.367691	0.48368	0.671028
AT1G20620.2	2.055	0.381245	0.357323	0.516331	2.168	0.403875	0.420072	0.565654
AT2G19430.1	1.632	0.248266	0.364653	0.711549	1.888	0.242744	0.389142	0.745291
AT5G14600.1	2.035	0.190957	0.378391	0.812831	2.533	0.182438	0.364458	0.807662
AT5G02500.2	1.983	0.330484	0.354817	0.574819	1.626	0.321167	0.353073	0.58969
AT2G18510.1	1.817	0.265947	0.364041	0.681743	1.859	0.250577	0.331656	0.668829
AT1G16260.1	1.979	0.267093	0.373568	0.690588	2.211	0.283002	0.447487	0.73864
AT5G09860.1	1.897	0.236614	0.374981	0.736794	2.086	0.24577	0.413963	0.759796
AT1G20620.1	2.032	0.396937	0.350996	0.489844	2.133	0.426516	0.411631	0.531826
AT3G25030.1	1.74	0.281774	0.376872	0.676107	1.708	0.241417	0.339821	0.694317
AT1G18300.1	1.558	0.291374	0.373168	0.659893	1.992	0.290202	0.433434	0.721095
AT4G08980.1	1.58	0.26466	0.368541	0.690276	1.531	0.234302	0.300242	0.656147
AT4G08980.2	1.679	0.227693	0.368749	0.748227	1.613	0.204824	0.299417	0.709636
AT3G08000.1	1.994	0.205626	0.379056	0.791241	2.272	0.207086	0.40303	0.805298
AT2G18890.1	1.82	0.26225	0.377503	0.704139	2.144	0.252916	0.413676	0.748255
AT1G50430.1	1.573	0.309547	0.36312	0.620883	1.787	0.313737	0.411942	0.665575
AT1G50430.2	1.62	0.309109	0.366225	0.625914	1.817	0.309807	0.407383	0.665418
AT5G07740.1	1.916	0.257942	0.372767	0.703862	1.982	0.228122	0.333139	0.70823
AT1G12900.2	1.696	0.367285	0.363033	0.541887	1.963	0.395886	0.433623	0.592128
AT1G12900.3	1.697	0.380425	0.357294	0.518908	1.961	0.412108	0.428214	0.567659
AT1G12900.1	1.925	0.377997	0.360641	0.526532	1.928	0.404956	0.427453	0.575624
AT5G64330.2	2.095	0.263266	0.376014	0.698737	2.524	0.275144	0.45134	0.752472
AT1G12900.4	1.726	0.355281	0.360539	0.553639	2.015	0.393343	0.437991	0.597719
AT5G65760.1	2.35	0.240953	0.396248	0.747918	2.087	0.24874	0.42698	0.76554
AT1G50450.1	1.523	0.330231	0.361697	0.58826	1.98	0.33566	0.396298	0.619582
AT1G19600.1	1.705	0.303875	0.359765	0.621403	1.665	0.276722	0.361944	0.665214
AT3G13690.1	1.821	0.256839	0.372682	0.706249	2.345	0.291261	0.479837	0.753566
AT3G52580.1	1.503	0.282732	0.354719	0.649468	1.698	0.267816	0.350904	0.666867
AT1G71210.1	2.038	0.189237	0.379369	0.816028	2.354	0.177593	0.35029	0.81085
AT1G17970.1	1.688	0.251655	0.371584	0.716756	2.519	0.259025	0.441483	0.763224
AT3G01472.1	1.685	0.264256	0.378769	0.701529	1.912	0.257012	0.404665	0.736875
AT3G13320.1	2.263	0.229071	0.394541	0.763653	1.926	0.214254	0.379686	0.777213
AT5G48570.1	1.349	0.339686	0.362544	0.581282	2.392	0.35037	0.501251	0.70066
AT3G15220.1	1.82	0.233888	0.366175	0.733581	1.652	0.220306	0.353854	0.745634
AT4G37930.1	1.74	0.383243	0.353543	0.510514	1.938	0.408072	0.397185	0.539009
AT2G31740.1	1.73	0.247004	0.368673	0.717394	1.957	0.239892	0.385022	0.744789
AT1G13360.1	1.5	0.246117	0.366194	0.718978	1.871	0.240838	0.382607	0.741582
AT1G13360.3	1.394	0.253929	0.363571	0.705948	1.686	0.24738	0.367661	0.716774
AT1G13360.2	1.423	0.246232	0.366012	0.720569	1.713	0.243795	0.370037	0.724893
AT3G14660.1	2.164	0.266348	0.368329	0.686984	1.743	0.259064	0.361895	0.692985
AT1G09310.1	1.546	0.367661	0.366955	0.550713	1.407	0.333365	0.333799	0.552659
AT5G15770.1	1.591	0.302995	0.39209	0.662851	1.895	0.317979	0.414224	0.661855
AT5G38720.1	1.44	0.347384	0.364643	0.57176	1.648	0.386813	0.405963	0.572505
ATCG01130.1	2.067	0.217795	0.375864	0.769497	2.738	0.241415	0.431177	0.780263
AT1G14140.1	1.831	0.272735	0.377963	0.68844	1.485	0.244565	0.338793	0.690186
AT5G64030.1	1.912	0.276652	0.364033	0.666757	1.687	0.261365	0.328708	0.648796
AT3G59068.1	1.791	0.167427	0.366008	0.843695	1.096	0.156541	0.285714	0.79035
AT4G12340.1	1.399	0.311061	0.354306	0.607005	1.371	0.284555	0.32855	0.615032
AT5G19150.1	1.736	0.237333	0.368934	0.731688	1.671	0.213022	0.340772	0.743019
AT5G19150.2	1.692	0.237306	0.365542	0.728282	1.644	0.218892	0.342628	0.735122
AT5G50440.1	1.552	0.267395	0.373331	0.692173	1.491	0.252349	0.338496	0.677619
AT3G22260.2	1.577	0.232995	0.365263	0.736198	1.929	0.251846	0.394945	0.734481
AT3G22260.3	1.536	0.237824	0.364305	0.728124	1.867	0.25655	0.392357	0.725983
AT3G22260.1	1.577	0.2302	0.365927	0.741814	1.938	0.247731	0.397568	0.743724
AT3G15070.1	1.976	0.242039	0.379425	0.733773	2.551	0.226437	0.402007	0.77564
AT1G66150.1	1.778	0.250437	0.36804	0.711937	2.326	0.256997	0.403251	0.737055
AT1G03090.2	1.718	0.29661	0.366096	0.64123	2.698	0.361757	0.537634	0.716702
AT3G27460.1	1.826	0.232063	0.37883	0.74939	1.399	0.200227	0.32598	0.751092
AT1G03090.1	1.743	0.287354	0.366825	0.654941	2.703	0.354987	0.537015	0.723789
AT5G50960.1	1.587	0.305624	0.368557	0.633507	1.558	0.291773	0.358846	0.641302
AT5G26000.1	1.935	0.42096	0.355875	0.473286	1.826	0.453934	0.402188	0.498168
AT5G26000.2	1.932	0.419495	0.35573	0.474625	1.82	0.45278	0.401905	0.498928
AT3G04930.2	1.954	0.271999	0.367533	0.676715	1.931	0.297996	0.376601	0.649723
AT4G25890.1	1.551	0.267139	0.372235	0.688672	2.02	0.307865	0.443819	0.701296
AT3G04930.1	1.805	0.290198	0.362675	0.645874	1.764	0.303499	0.368897	0.63352
AT3G22480.2	1.656	0.325028	0.368288	0.599715	1.372	0.339507	0.390511	0.616256
AT3G22480.1	1.737	0.313413	0.369642	0.616636	1.401	0.315812	0.387633	0.643555
AT4G02770.1	1.588	0.407975	0.349122	0.48096	1.745	0.468665	0.447147	0.530608
AT1G70670.1	1.905	0.213149	0.369116	0.772635	1.926	0.220732	0.396328	0.781483
AT4G33460.1	1.901	0.241423	0.372192	0.726714	2.201	0.252699	0.419664	0.752249
AT3G61700.1	1.918	0.243666	0.37983	0.732466	2.238	0.246951	0.403568	0.747886
AT1G30970.2	1.616	0.246001	0.361139	0.709682	1.504	0.228601	0.345456	0.723734
AT1G30970.1	1.635	0.263022	0.365081	0.686543	1.527	0.245819	0.35268	0.703385
AT5G05200.1	1.638	0.322927	0.352725	0.588676	1.698	0.325025	0.379275	0.618656
AT4G25870.1	1.818	0.251945	0.379529	0.718799	2.09	0.244025	0.387862	0.740072
AT4G14600.1	1.659	0.231656	0.375637	0.750534	1.819	0.232768	0.389243	0.760382
AT2G16900.1	2.127	0.246404	0.384852	0.7321	1.794	0.240519	0.366257	0.725292
AT2G16900.3	2.057	0.243947	0.380436	0.732281	1.722	0.231606	0.354877	0.727937
AT2G16900.2	1.923	0.280366	0.378626	0.675892	1.618	0.270582	0.35442	0.665661
AT1G73180.2	1.648	0.252055	0.366851	0.708109	1.945	0.247581	0.356183	0.700816
AT1G04780.1	1.903	0.287466	0.357395	0.641504	1.438	0.265485	0.327518	0.641997
AT2G29540.1	1.405	0.305554	0.355995	0.616686	1.642	0.327663	0.411671	0.651272
AT5G50315.1	1.987	0.254384	0.37709	0.713223	1.817	0.235601	0.344501	0.710435
AT5G35450.1	2.611	0.185281	0.377167	0.819506	2.564	0.200264	0.373978	0.793031
AT1G52930.1	1.445	0.304064	0.374437	0.643217	1.773	0.308605	0.410425	0.672844
AT1G75630.2	1.949	0.19096	0.360495	0.798325	1.699	0.173031	0.327272	0.800133
AT1G75630.1	1.623	0.260804	0.36182	0.689509	1.473	0.24092	0.330367	0.684204
AT1G10450.1	2.156	0.242204	0.392373	0.742313	2.145	0.240381	0.3859	0.739994
AT5G20290.1	1.895	0.414483	0.360438	0.48409	1.945	0.423808	0.397998	0.520798
AT5G13680.1	2.467	0.233987	0.391659	0.753361	2.36	0.226318	0.388133	0.76033
AT1G21400.1	1.677	0.209132	0.361213	0.770433	1.21	0.15172	0.23431	0.728298
AT2G05250.1	1.994	0.265276	0.37816	0.69895	1.631	0.241195	0.35307	0.711735
AT4G14030.1	1.417	0.28795	0.360376	0.648234	1.66	0.26913	0.345405	0.658478
AT1G53110.1	1.677	0.254444	0.365989	0.702374	1.719	0.243539	0.345856	0.696497
AT3G52105.1	1.752	0.207265	0.376339	0.788347	1.785	0.2185	0.372179	0.764684
AT1G64355.2	1.772	0.238942	0.377498	0.736631	2.156	0.254543	0.425902	0.758562
AT1G64355.1	1.795	0.260869	0.369403	0.694844	1.854	0.279745	0.415738	0.718501
AT3G09920.1	1.953	0.274531	0.37547	0.682186	1.673	0.250414	0.335386	0.674182
AT2G01670.1	1.635	0.315206	0.365756	0.612919	1.454	0.273789	0.341521	0.645819
AT3G56310.1	1.611	0.307018	0.366701	0.628234	1.444	0.266607	0.32884	0.64244
AT3G56310.2	1.602	0.301374	0.366933	0.636535	1.432	0.255867	0.325257	0.655043
AT2G32180.1	1.355	0.35755	0.344816	0.532801	1.721	0.370427	0.396584	0.582079
AT3G26060.1	1.604	0.386178	0.354456	0.512983	1.687	0.398549	0.405914	0.559762
AT4G36210.1	1.789	0.296673	0.368552	0.645841	1.426	0.271109	0.3182	0.62154
AT1G78040.2	1.724	0.403809	0.356511	0.495325	1.74	0.394719	0.365029	0.517029
AT4G36210.3	1.771	0.315938	0.368209	0.618098	1.411	0.285037	0.316938	0.597638
AT5G59440.1	1.514	0.282888	0.362618	0.65902	1.915	0.253157	0.369785	0.707835
AT3G07640.1	1.438	0.292793	0.371765	0.655899	1.8	0.31238	0.406705	0.663852
AT1G30880.1	1.392	0.331181	0.354667	0.578824	1.655	0.340054	0.360642	0.572251
AT1G80670.1	2.227	0.248047	0.377117	0.718722	2.478	0.247426	0.401107	0.741518
AT4G13640.2	1.752	0.275159	0.37219	0.678848	1.741	0.273596	0.389135	0.698304
AT4G13640.1	1.662	0.269112	0.365362	0.680656	1.669	0.260702	0.375228	0.703737
AT5G13240.1	1.757	0.261803	0.370442	0.693376	2.067	0.260121	0.419931	0.744295
AT4G38710.2	1.733	0.348915	0.358123	0.558349	1.702	0.321617	0.325757	0.555597
AT3G07660.1	1.74	0.238842	0.368549	0.729662	1.743	0.225909	0.35785	0.739029
AT4G31130.1	2.074	0.234562	0.369782	0.735859	1.79	0.238384	0.407514	0.765955
AT2G30390.1	1.964	0.317166	0.361271	0.603969	1.655	0.328003	0.386761	0.621812
AT2G29310.2	1.679	0.27689	0.378403	0.684868	3.417	0.330985	0.506871	0.72048
AT2G30390.2	2.015	0.301977	0.366765	0.632708	1.692	0.31339	0.394594	0.651044
AT3G60590.4	1.532	0.298057	0.377797	0.652598	1.664	0.292842	0.393668	0.675457
AT3G15360.1	1.454	0.321202	0.354445	0.591056	1.855	0.337515	0.379395	0.60274
AT1G17340.1	2.132	0.247223	0.377531	0.723399	2.181	0.254137	0.413809	0.749043
AT2G27770.1	1.91	0.247701	0.385421	0.73196	1.996	0.227976	0.400427	0.772233
AT5G54290.1	1.518	0.315109	0.366685	0.616683	1.914	0.294603	0.358723	0.635282
AT5G54290.2	1.654	0.301458	0.367737	0.637346	1.893	0.282466	0.353858	0.646256
AT2G21470.3	1.946	0.235421	0.37802	0.738775	2.335	0.229057	0.380337	0.75407
AT2G21470.2	2.063	0.226461	0.386277	0.761251	2.479	0.216932	0.382183	0.774348
AT2G21470.1	1.921	0.238897	0.376836	0.732742	2.302	0.231796	0.376616	0.745741
AT5G49160.1	1.762	0.256998	0.374853	0.707695	2.007	0.274713	0.419349	0.725276
AT4G28490.1	1.65	0.256022	0.370964	0.70591	1.832	0.226631	0.363161	0.742489
AT2G02560.2	2.059	0.238993	0.381853	0.740385	2.144	0.227009	0.387112	0.762658
AT1G72680.1	1.57	0.238667	0.36497	0.72693	1.265	0.201373	0.281214	0.689877
AT2G02560.1	2.061	0.238017	0.381703	0.741762	2.144	0.227203	0.387549	0.762822
AT2G35630.1	1.792	0.27798	0.369417	0.670501	1.924	0.265982	0.341572	0.656594
AT3G02260.1	2.693	0.201703	0.383144	0.797336	2.559	0.185187	0.347009	0.794222
AT3G46940.1	1.664	0.266338	0.371997	0.690318	1.897	0.262521	0.41114	0.735636
AT5G41700.5	1.688	0.241673	0.360331	0.719038	2.137	0.251445	0.40491	0.746177
AT3G61700.2	1.939	0.237519	0.380515	0.742545	2.257	0.24264	0.404382	0.754829
AT5G41700.1	1.555	0.31533	0.359981	0.608456	1.957	0.33525	0.405422	0.631135
AT3G44100.1	1.457	0.283829	0.367328	0.663758	1.577	0.270783	0.335097	0.64038
AT5G41700.3	1.578	0.259791	0.366671	0.697451	1.945	0.270967	0.402852	0.716515
AT1G24147.1	1.512	0.287423	0.366762	0.657868	2.894	0.345117	0.642303	0.795783
AT2G37230.1	1.635	0.284254	0.368856	0.663425	1.928	0.276915	0.366784	0.66954
AT4G21650.1	2.015	0.237701	0.384943	0.745277	1.516	0.210511	0.299505	0.69542
AT3G16060.1	2.014	0.306859	0.367874	0.624337	1.764	0.2943	0.335031	0.60534
AT4G24930.1	1.679	0.312196	0.372396	0.629468	1.786	0.317798	0.434194	0.685491
AT1G20050.1	1.917	0.283016	0.373137	0.667429	1.594	0.265448	0.370351	0.69091
AT1G06470.2	1.955	0.225595	0.383027	0.760952	1.75	0.219609	0.361104	0.753361
AT3G10220.1	1.811	0.265809	0.370123	0.689285	1.6	0.244014	0.335585	0.683778
AT3G59970.1	1.629	0.318417	0.363176	0.609053	1.834	0.313443	0.390767	0.645425
AT1G80230.1	1.773	0.29755	0.373489	0.648587	1.781	0.294681	0.383992	0.664328
AT3G59970.3	1.603	0.337211	0.362048	0.5822	1.836	0.340691	0.39761	0.617755
AT1G55000.2	2.16	0.261348	0.384606	0.71065	1.508	0.232743	0.313507	0.67555
AT1G55000.3	2.126	0.266466	0.382464	0.700478	1.492	0.237608	0.313827	0.66778
AT1G55000.1	2.145	0.271055	0.38305	0.69454	1.532	0.251763	0.320042	0.651537
AT2G30695.1	1.538	0.302637	0.356773	0.620665	1.533	0.298754	0.398227	0.67713
AT2G30695.2	1.694	0.259888	0.362562	0.689851	1.654	0.264617	0.405843	0.731977
AT2G20950.4	1.976	0.255472	0.374714	0.710646	1.996	0.26594	0.372873	0.693788
ATCG00670.1	1.522	0.261693	0.369726	0.698147	1.601	0.255139	0.375007	0.709825
AT1G62045.1	1.576	0.211454	0.364186	0.768425	1.422	0.163328	0.294915	0.785215
AT2G20880.1	1.572	0.256253	0.372912	0.708604	0.736	0.13123	0.164719	0.649894
AT2G05620.1	1.881	0.313579	0.373097	0.625895	1.673	0.304492	0.379648	0.64714
AT1G22790.2	1.825	0.238622	0.371655	0.73418	1.477	0.220304	0.3365	0.728914
AT5G27470.1	1.411	0.327247	0.34952	0.5779	1.988	0.360075	0.419768	0.617998
AT3G58470.1	1.617	0.254768	0.363348	0.700325	1.651	0.24258	0.363183	0.71452
AT1G55020.1	1.724	0.250305	0.377245	0.719217	1.33	0.21064	0.284964	0.680651
AT1G56300.1	1.89	0.31257	0.371625	0.620633	2.326	0.354601	0.480602	0.678984
AT1G21920.1	1.828	0.246578	0.376528	0.726921	2.346	0.254821	0.427203	0.757529
AT4G09000.2	1.612	0.301411	0.361292	0.62796	1.957	0.319569	0.400667	0.648936
AT4G09000.1	1.597	0.337735	0.35812	0.574099	1.919	0.355688	0.400794	0.602257
AT5G60800.2	1.476	0.333013	0.357466	0.583073	1.467	0.310925	0.340383	0.588497
AT5G60800.1	1.507	0.347673	0.357851	0.564176	1.509	0.331143	0.341714	0.561068
AT4G25130.1	1.702	0.363529	0.347953	0.527064	2.038	0.380521	0.413761	0.582389
AT2G47470.4	1.831	0.380349	0.359683	0.524042	1.577	0.37438	0.361337	0.53551
AT2G47470.3	1.837	0.374014	0.361923	0.534427	1.583	0.369948	0.363538	0.543544
AT2G47470.2	1.808	0.370613	0.358456	0.533158	1.551	0.364328	0.353527	0.537664
AT2G47470.1	1.802	0.386202	0.355979	0.51128	1.562	0.384599	0.358018	0.519591
AT5G04990.1	1.506	0.284809	0.360091	0.651111	1.355	0.257201	0.324471	0.650617
AT3G46430.1	1.387	0.312102	0.360386	0.613207	1.566	0.299029	0.375336	0.646156
AT3G05230.2	1.632	0.251459	0.375301	0.717996	1.779	0.252195	0.381505	0.720022
AT3G54790.1	1.859	0.228745	0.376484	0.750376	2.331	0.23912	0.419841	0.77395
AT5G23290.1	1.489	0.296807	0.36166	0.630974	1.474	0.246801	0.319382	0.659116
AT3G47860.1	1.505	0.339015	0.363475	0.581851	1.773	0.347061	0.396561	0.60896
AT2G26970.2	1.569	0.276531	0.37673	0.684785	1.941	0.289595	0.403565	0.691418
AT2G26970.1	1.579	0.294872	0.378309	0.659184	1.969	0.307208	0.40809	0.670959
AT5G64560.1	1.817	0.26728	0.376547	0.694436	1.569	0.25424	0.357593	0.693388
AT5G64560.2	1.697	0.254934	0.367279	0.705441	1.624	0.249609	0.36127	0.70266
AT4G20960.1	1.961	0.302096	0.377607	0.642246	1.953	0.298585	0.40008	0.674511
AT2G39770.1	1.512	0.314826	0.360796	0.609257	1.535	0.332987	0.38674	0.617367
AT4G12460.1	2.529	0.23952	0.39748	0.749018	1.839	0.21833	0.346424	0.734802
AT4G12460.2	2.649	0.233785	0.39744	0.757051	1.889	0.210802	0.353216	0.755645
AT2G39770.2	1.51	0.317683	0.36088	0.605397	1.533	0.334777	0.387126	0.615511
AT4G32850.8	1.823	0.276315	0.372021	0.676108	2.05	0.279876	0.405608	0.703353
AT1G72690.1	1.933	0.207835	0.374334	0.780434	1.264	0.166851	0.282148	0.763791
AT1G16180.1	1.871	0.28315	0.371222	0.666453	1.435	0.251872	0.351421	0.692997
AT1G72500.1	2.234	0.191647	0.375747	0.809209	2.045	0.193523	0.371144	0.801664
AT2G14120.3	2.126	0.248446	0.372931	0.718372	1.905	0.254873	0.374253	0.712169
AT2G27040.1	1.967	0.227241	0.381102	0.758575	1.731	0.225137	0.369656	0.750655
AT3G58780.3	6.922	0.146908	0.623086	0.948781	5.93	0.143743	0.611461	0.950203
AT4G28706.2	1.753	0.271982	0.365812	0.677572	1.794	0.291655	0.423375	0.706494
AT5G63940.1	1.782	0.235319	0.368016	0.73312	1.775	0.225803	0.365158	0.745702
AT4G19490.1	1.975	0.236687	0.377155	0.741355	1.924	0.231943	0.382628	0.752227
AT4G19490.2	2.026	0.234813	0.380032	0.746639	1.961	0.230166	0.383004	0.754685
AT5G01260.2	1.889	0.250836	0.376464	0.714286	1.491	0.230951	0.312839	0.675632
AT5G01260.1	2.127	0.215709	0.381268	0.77291	1.644	0.204357	0.318043	0.729378
AT3G12030.1	1.657	0.265203	0.394324	0.716211	1.85	0.247837	0.418834	0.764667
AT5G61330.1	1.586	0.32884	0.362724	0.591952	1.67	0.323745	0.362809	0.598778
AT1G12650.2	1.636	0.25757	0.360447	0.690492	1.695	0.25471	0.35305	0.688803
AT1G12650.3	1.63	0.257441	0.360265	0.690326	1.676	0.24857	0.349454	0.694544
AT1G12650.1	1.63	0.252476	0.3592	0.69716	1.685	0.244688	0.351304	0.703448
AT5G19910.2	1.754	0.201985	0.367506	0.788204	1.428	0.185583	0.342783	0.793113
AT1G12650.4	1.621	0.254787	0.359243	0.693221	1.657	0.242958	0.344792	0.698085
AT3G12050.2	1.618	0.269411	0.353095	0.664402	1.837	0.285509	0.374445	0.665824
AT5G11640.1	1.837	0.248799	0.376033	0.720361	1.33	0.215579	0.32051	0.716717
AT3G23820.1	1.946	0.324101	0.360209	0.593379	1.612	0.275568	0.308141	0.598759
AT3G12050.1	1.588	0.298167	0.354136	0.624435	1.813	0.306154	0.371507	0.632944
AT3G08890.1	1.73	0.256016	0.369996	0.703621	1.994	0.252077	0.395634	0.734526
AT3G08890.2	1.855	0.249495	0.375407	0.717709	2.07	0.236072	0.387007	0.749348
AT5G02530.2	1.469	0.292483	0.365737	0.649134	1.548	0.277462	0.375631	0.681248
AT2G33550.1	1.596	0.297243	0.371756	0.647869	1.794	0.331664	0.409062	0.641158
AT5G02530.1	1.463	0.308863	0.363912	0.623559	1.566	0.288909	0.365251	0.651264
AT4G09340.1	2.235	0.214154	0.399243	0.791697	2.224	0.215158	0.369064	0.762411
AT1G04280.1	1.868	0.269527	0.371812	0.685252	3.088	0.313099	0.489216	0.73043
AT5G10750.1	1.911	0.249448	0.370179	0.714526	2.363	0.242022	0.398636	0.752308
AT2G34730.1	1.876	0.245335	0.372108	0.721714	1.598	0.256831	0.358273	0.692267
AT4G20440.1	1.764	0.234265	0.371456	0.743224	1.731	0.234573	0.369959	0.738159
AT2G23080.1	1.57	0.241954	0.364423	0.72236	1.535	0.231255	0.340625	0.710634
AT2G23080.2	1.659	0.227681	0.366792	0.746008	1.681	0.217908	0.357758	0.750417
AT4G00890.1	1.843	0.228415	0.378114	0.754374	1.985	0.227498	0.368536	0.747329
AT1G01910.5	1.592	0.266636	0.360469	0.67834	1.586	0.26745	0.36099	0.677382
AT1G01910.4	1.666	0.266127	0.366805	0.686478	1.664	0.274932	0.367	0.671984
AT5G10770.1	2.244	0.185055	0.389918	0.827719	2.521	0.211235	0.449789	0.830203
AT1G54390.6	1.854	0.242937	0.373089	0.724693	1.816	0.24143	0.369195	0.726737
AT1G01910.1	1.61	0.275974	0.363856	0.66874	1.629	0.284798	0.367555	0.658023
AT4G23940.1	1.723	0.249357	0.371979	0.718314	2.01	0.250196	0.384805	0.727013
AT1G01910.2	1.604	0.292611	0.364289	0.644286	1.628	0.299932	0.372241	0.641909
AT2G27290.1	1.414	0.309291	0.358075	0.614337	1.363	0.290361	0.351212	0.635258
AT4G01280.1	1.518	0.242424	0.356325	0.711277	1.278	0.20418	0.283828	0.690278
AT4G01280.2	1.544	0.247171	0.359153	0.706761	1.301	0.212715	0.290999	0.683839
AT5G20170.1	2.294	0.224964	0.380751	0.76203	2.13	0.207633	0.356468	0.764728
AT5G52110.1	1.529	0.234332	0.366348	0.734128	1.467	0.225436	0.333187	0.713231
AT4G33350.2	1.61	0.298156	0.368665	0.644386	2.08	0.311541	0.43376	0.688949
AT5G52110.2	1.61	0.211554	0.368604	0.773369	1.437	0.185875	0.29791	0.743069
AT3G13810.1	1.795	0.242669	0.372247	0.727814	1.727	0.225992	0.349916	0.730697
AT1G06890.1	1.885	0.252219	0.372691	0.712016	1.606	0.228491	0.352713	0.730723
AT5G27410.2	2.021	0.22409	0.385764	0.766148	2.101	0.201397	0.35056	0.769911
AT3G13810.2	1.795	0.232369	0.37484	0.747709	1.699	0.214535	0.34454	0.744436
AT1G33700.1	2.828	0.166917	0.401524	0.861917	2.336	0.180584	0.400249	0.843079
AT4G31300.1	1.516	0.299211	0.357801	0.626389	1.622	0.309313	0.389537	0.649767
AT3G16570.1	1.831	0.28978	0.372336	0.655181	1.903	0.299949	0.425992	0.699225
AT1G61240.3	2.079	0.208114	0.379834	0.787178	2.227	0.196639	0.343924	0.768965
AT3G23760.1	1.416	0.294911	0.36384	0.642725	1.861	0.277911	0.378165	0.679578
AT1G61240.1	2.053	0.209128	0.377106	0.783114	2.192	0.198764	0.340406	0.761218
AT1G06890.2	1.838	0.248285	0.367972	0.712922	1.561	0.225016	0.34756	0.731538
AT1G61240.4	2.117	0.198848	0.378154	0.80036	2.265	0.187313	0.342046	0.783706
AT2G20190.1	2.229	0.258	0.378025	0.707116	2.04	0.23757	0.373171	0.73404
AT3G61210.1	1.433	0.269173	0.365811	0.684009	1.621	0.297526	0.405756	0.684859
AT5G27990.1	1.518	0.292227	0.365475	0.646849	1.908	0.301264	0.383462	0.648149
AT3G04080.1	2.46	0.231171	0.394135	0.760423	2.439	0.209443	0.346441	0.752138
AT2G41710.1	1.851	0.290342	0.365651	0.648414	1.557	0.284228	0.352534	0.643616
AT2G41710.2	1.855	0.283329	0.366071	0.659507	1.561	0.277004	0.350369	0.651348
AT1G33390.1	2.285	0.236924	0.384855	0.745269	2.62	0.218	0.381875	0.770601
AT2G35020.1	2.151	0.260567	0.381209	0.700821	2.001	0.254739	0.37038	0.705929
AT3G43520.1	1.489	0.313755	0.357444	0.605494	1.482	0.290532	0.325241	0.596488
AT5G65940.1	1.841	0.309599	0.370532	0.627693	1.601	0.296269	0.365909	0.643081
AT1G12750.2	1.941	0.227052	0.381231	0.757657	2.216	0.223754	0.404636	0.784025
AT5G38560.1	1.998	0.256473	0.373174	0.704698	1.908	0.242148	0.359309	0.712284
AT5G05660.1	1.984	0.251192	0.378452	0.716291	1.87	0.234535	0.344479	0.708702
AT1G26460.1	1.503	0.272659	0.371059	0.681479	1.646	0.244061	0.357187	0.71019
AT3G02450.1	1.733	0.294352	0.36718	0.646527	1.763	0.277512	0.342679	0.639892
AT1G77510.1	1.884	0.240632	0.37425	0.733848	1.604	0.232179	0.325828	0.694625
AT5G54770.1	1.55	0.397852	0.343812	0.483516	1.784	0.419285	0.407899	0.539535
AT2G45680.1	1.902	0.256385	0.370215	0.704417	1.963	0.251094	0.395072	0.736178
AT1G27150.1	1.866	0.241476	0.36957	0.725707	1.854	0.230626	0.35492	0.727938
AT1G15030.1	1.795	0.25733	0.376022	0.710465	1.845	0.262935	0.399251	0.72503
AT4G18370.1	1.743	0.306857	0.361385	0.620089	1.94	0.335937	0.420776	0.648212
AT3G47490.1	1.823	0.267574	0.377423	0.695845	1.835	0.281455	0.437907	0.736464
AT4G19110.1	1.852	0.291473	0.366038	0.646563	1.782	0.264823	0.352924	0.672658
AT1G16430.1	1.499	0.256638	0.373592	0.705725	1.534	0.218623	0.349104	0.742998
AT4G19110.3	1.719	0.29603	0.365988	0.641767	1.65	0.266738	0.348672	0.666024
AT4G19110.2	1.855	0.286946	0.364962	0.651414	1.792	0.264777	0.353099	0.673285
AT3G07860.1	1.707	0.269925	0.373824	0.690352	1.545	0.247138	0.354766	0.702851
AT5G19190.1	1.483	0.339621	0.352727	0.566872	1.745	0.358415	0.424871	0.624838
AT2G04390.1	1.735	0.324164	0.364382	0.600882	1.481	0.33765	0.38046	0.604062
AT1G77350.2	1.815	0.233005	0.375763	0.745227	1.775	0.201975	0.340175	0.758869
AT1G77350.1	1.787	0.240796	0.369518	0.727062	1.619	0.205031	0.328121	0.74241
AT5G12470.1	1.877	0.286479	0.369007	0.655573	2.089	0.319934	0.435965	0.682988
AT5G65990.1	1.524	0.267933	0.371492	0.689267	1.463	0.200717	0.270728	0.677916
AT3G13440.1	1.912	0.255923	0.366273	0.699883	1.684	0.241604	0.35252	0.706706
AT1G64990.1	1.716	0.261232	0.376877	0.701714	1.784	0.229276	0.329922	0.699691
AT2G37640.1	2.135	0.240777	0.383711	0.740113	2.142	0.244533	0.409306	0.758376
AT1G05840.1	1.986	0.232335	0.393704	0.760107	2.349	0.214219	0.366362	0.763682
AT4G38510.1	1.507	0.318246	0.366719	0.613707	1.554	0.282662	0.33206	0.619587
AT4G38510.2	1.52	0.31694	0.365416	0.613401	1.566	0.282589	0.333898	0.622279
AT4G38510.3	1.532	0.31513	0.367238	0.618202	1.583	0.279035	0.33403	0.627585
AT4G38510.4	1.518	0.315896	0.367005	0.617087	1.559	0.28044	0.330978	0.621414
AT4G38510.5	1.527	0.307238	0.365622	0.626682	1.587	0.275311	0.338743	0.638748
AT1G68260.1	1.714	0.263542	0.376838	0.700322	1.579	0.244798	0.371433	0.726869
AT1G57680.2	1.425	0.270247	0.362023	0.678226	1.935	0.297625	0.422793	0.700513
AT1G57680.1	1.428	0.268843	0.361959	0.680452	1.957	0.290834	0.417081	0.702994
AT1G55340.1	1.57	0.349146	0.368065	0.572724	1.489	0.350523	0.379086	0.586899
AT1G55340.2	1.631	0.349307	0.369261	0.574293	1.43	0.345595	0.387958	0.603625
AT5G51300.1	1.795	0.273091	0.380564	0.689087	1.873	0.259174	0.356456	0.685402
AT5G51300.3	1.769	0.270459	0.378343	0.690588	1.855	0.258284	0.356153	0.686934
AT5G51300.2	1.752	0.274889	0.378048	0.683705	1.846	0.263805	0.357752	0.680294
AT4G28030.1	1.396	0.332666	0.354823	0.578873	1.92	0.359731	0.440475	0.636723
AT2G17820.1	1.799	0.256349	0.370509	0.705135	1.989	0.244967	0.37122	0.722154
AT2G34750.1	1.757	0.295552	0.367101	0.643506	1.676	0.270832	0.36262	0.674161
AT4G09320.1	1.348	0.311983	0.346367	0.593286	1.584	0.326921	0.365284	0.600008
AT2G38290.1	1.552	0.271161	0.374925	0.687437	1.905	0.255571	0.377165	0.710548
AT1G73250.1	1.672	0.229924	0.366666	0.739022	1.703	0.1896	0.341588	0.781847
AT5G59160.2	1.604	0.228423	0.368999	0.747789	2.05	0.217733	0.393004	0.782129
AT2G38290.2	1.618	0.254279	0.377027	0.714654	1.976	0.238815	0.372336	0.730347
AT5G52560.1	2.241	0.224497	0.377798	0.75977	1.974	0.216669	0.363436	0.759987
AT5G16220.1	1.695	0.279727	0.365062	0.662626	1.607	0.247348	0.306602	0.64203
AT1G47340.1	2.394	0.195785	0.404727	0.820016	1.624	0.164254	0.321913	0.809455
AT5G09410.1	2.094	0.240108	0.387314	0.744604	1.765	0.246171	0.39116	0.741508
AT5G09410.2	2.088	0.245282	0.387233	0.736267	1.79	0.248471	0.396129	0.742719
AT3G61415.2	1.813	0.227898	0.387083	0.761679	1.863	0.222602	0.36278	0.750275
AT1G10650.1	2.083	0.211996	0.376352	0.779336	2.055	0.20638	0.345706	0.758501
AT1G10650.2	2.127	0.199072	0.374311	0.798222	2.078	0.190819	0.341627	0.781712
AT1G10840.2	1.564	0.256194	0.366233	0.701665	2.123	0.274081	0.424553	0.734111
AT2G18300.1	1.752	0.316208	0.363279	0.610917	1.787	0.358135	0.450681	0.652162
AT2G18300.3	1.724	0.295999	0.363745	0.641475	1.771	0.33952	0.445364	0.670416
AT2G18300.2	1.74	0.328156	0.36332	0.595177	1.781	0.372599	0.454907	0.639727
AT3G62900.1	2.166	0.226396	0.37346	0.753071	1.997	0.208602	0.330001	0.739514
AT1G11720.1	2.277	0.275805	0.37197	0.67422	2.21	0.294749	0.40277	0.683476
AT1G15420.1	1.753	0.296423	0.365523	0.635948	1.851	0.296257	0.405272	0.678171
AT1G24340.1	2.527	0.227141	0.384078	0.758769	2.091	0.227314	0.396849	0.771417
AT5G19090.1	1.863	0.30984	0.365988	0.621785	1.821	0.310074	0.390048	0.649834
AT5G09820.1	1.693	0.226255	0.367963	0.747926	2.016	0.235309	0.358164	0.717491
AT3G26420.1	2.347	0.224063	0.378732	0.759893	2.53	0.23953	0.41459	0.766481
AT5G51440.1	1.388	0.319186	0.370822	0.618176	1.406	0.188073	0.315294	0.761588
AT2G39360.1	2.1	0.23297	0.379489	0.74648	2.405	0.234235	0.407165	0.770597
AT3G09970.1	1.823	0.250126	0.3678	0.712477	1.534	0.217262	0.32115	0.713999
AT2G29450.1	1.413	0.374565	0.354363	0.527447	1.451	0.322526	0.299369	0.514088
AT1G72010.1	1.708	0.250827	0.373131	0.716837	1.927	0.234393	0.380441	0.746262
AT2G45540.1	2.581	0.220601	0.38586	0.770609	2.4	0.210504	0.375301	0.776073
AT5G47710.1	1.638	0.261646	0.372217	0.699696	1.759	0.240152	0.39328	0.75174
AT2G45540.2	2.617	0.215911	0.385211	0.777269	2.436	0.206674	0.376	0.782923
AT3G15390.2	1.608	0.270648	0.374839	0.688593	2.094	0.249945	0.377944	0.722743
AT3G14075.1	2.164	0.218014	0.3884	0.775839	2.611	0.237836	0.41617	0.769383
AT3G01910.2	1.661	0.334034	0.354893	0.571628	1.591	0.30617	0.361198	0.622914
AT3G09630.2	1.606	0.345323	0.358869	0.565683	1.566	0.362293	0.377173	0.569051
AT3G05727.1	1.64	0.24619	0.364421	0.715949	2.174	0.359194	0.565733	0.73974
AT3G54430.1	1.743	0.220432	0.378533	0.767615	2.038	0.196069	0.349078	0.777565
AT2G20130.1	1.996	0.244674	0.380999	0.733202	1.837	0.224642	0.381694	0.766141
AT1G31920.1	2.143	0.24094	0.390824	0.745244	2.349	0.254436	0.438749	0.768215
AT2G42320.1	2.265	0.264373	0.377091	0.697402	1.694	0.238895	0.333299	0.689926
AT2G42320.2	2.329	0.257055	0.379357	0.710562	1.689	0.231677	0.327342	0.69487
AT5G47710.2	1.614	0.241628	0.372993	0.733547	1.706	0.229774	0.387656	0.763852
AT4G25740.2	1.511	0.274868	0.365002	0.672717	1.849	0.265791	0.403787	0.722574
AT4G25740.1	1.448	0.309778	0.360132	0.616027	1.78	0.31284	0.411339	0.665545
AT2G45560.2	1.649	0.255404	0.385618	0.722066	1.845	0.243393	0.427593	0.774617
AT2G45560.1	1.838	0.239716	0.384481	0.742767	1.926	0.235563	0.433337	0.791238
AT5G48030.1	2.157	0.288903	0.369317	0.652912	2.133	0.303385	0.408202	0.675677
AT3G60590.2	1.523	0.308995	0.375098	0.633484	1.669	0.289693	0.38634	0.671858
AT5G44572.1	1.537	0.277602	0.372249	0.67862	3.132	0.33559	0.53507	0.739892
AT5G66510.2	1.632	0.268358	0.371889	0.69056	1.995	0.251271	0.380119	0.722177
AT4G09730.1	1.759	0.336698	0.355871	0.570393	1.952	0.362027	0.406031	0.601783
AT3G21630.1	1.67	0.274825	0.370585	0.675304	1.986	0.259494	0.383815	0.713052
AT5G66510.1	1.63	0.286386	0.372462	0.663742	1.999	0.265339	0.381598	0.701337
AT2G15570.1	1.62	0.258058	0.36869	0.702745	1.596	0.234113	0.349196	0.717848
AT1G54170.1	1.757	0.235963	0.369771	0.733013	2.176	0.224104	0.343661	0.723514
AT2G15570.2	1.652	0.252783	0.370039	0.712394	1.626	0.22994	0.352943	0.730079
AT4G00620.1	1.895	0.248785	0.386252	0.729992	2.065	0.246098	0.407144	0.753047
AT2G35260.1	1.648	0.338652	0.369524	0.588299	1.519	0.326052	0.362933	0.598583
AT3G02900.2	1.565	0.291573	0.363378	0.646722	1.75	0.293154	0.387868	0.671961
AT4G39710.1	1.777	0.312991	0.373067	0.624588	2.194	0.326215	0.463628	0.699078
AT4G34230.1	1.566	0.316005	0.370714	0.620363	1.03	0.222658	0.229714	0.560726
AT4G39710.2	1.787	0.299664	0.373129	0.64125	2.22	0.31926	0.468404	0.71107
AT1G29470.2	1.597	0.363465	0.35014	0.530811	1.525	0.371055	0.362427	0.541603
AT1G26260.2	1.814	0.219653	0.370166	0.761892	1.372	0.170489	0.301354	0.780515
AT1G25275.3	1.71	0.307596	0.385193	0.645578	1.683	0.324489	0.430523	0.672861
AT1G25275.2	1.547	0.34522	0.355381	0.557529	1.581	0.37179	0.420037	0.604915
AT1G25275.1	1.672	0.361908	0.373642	0.559183	1.673	0.393431	0.435673	0.595204
AT1G53430.2	1.735	0.265295	0.366823	0.689086	2.504	0.309589	0.508908	0.754193
AT3G09050.1	1.986	0.275457	0.379401	0.683251	1.819	0.271442	0.380852	0.692362
AT3G15640.2	1.927	0.277105	0.377022	0.681281	1.798	0.285584	0.392137	0.68543
AT3G15640.1	1.926	0.280006	0.374814	0.674772	1.8	0.283933	0.388595	0.684189
AT1G15860.2	1.802	0.240172	0.367376	0.723055	1.972	0.256819	0.388774	0.722436
AT1G01040.2	2.437	0.242861	0.376449	0.727958	2.457	0.243433	0.380979	0.731317
AT5G14030.4	1.494	0.261607	0.356501	0.683502	1.746	0.267084	0.364333	0.680106
AT2G46170.2	2.025	0.211039	0.379587	0.780915	1.789	0.179308	0.328575	0.784171
AT5G14030.1	1.474	0.285541	0.352006	0.638683	1.704	0.292189	0.353678	0.628829
AT5G14030.2	1.487	0.260633	0.355672	0.684055	1.737	0.2655	0.362398	0.680487
AT5G14030.3	1.493	0.260088	0.355645	0.684851	1.745	0.265346	0.363132	0.681302
AT4G36920.2	2.16	0.233242	0.379954	0.747362	1.871	0.218688	0.376763	0.769976
AT4G36920.1	2.091	0.246552	0.379623	0.724639	1.744	0.227513	0.361599	0.740607
AT5G14050.1	2.038	0.283227	0.374433	0.665935	1.598	0.258984	0.351815	0.680214
AT1G60550.1	1.663	0.288892	0.373063	0.660554	2.484	0.302726	0.440732	0.70543
AT1G69640.1	1.804	0.278381	0.367282	0.6685	1.698	0.248383	0.3299	0.672143
AT3G12990.3	1.742	0.267462	0.372632	0.688717	1.736	0.249954	0.36418	0.707681
AT3G12990.2	1.746	0.267628	0.373266	0.688949	1.74	0.248018	0.364083	0.710156
AT5G57490.1	1.617	0.286493	0.359663	0.646296	1.763	0.330971	0.43067	0.665548
AT5G53050.3	1.849	0.264711	0.376449	0.698735	2.196	0.26844	0.396623	0.713208
AT3G13870.2	2.016	0.314087	0.367126	0.615882	1.794	0.276363	0.325572	0.620772
AT3G13870.1	1.963	0.319527	0.36284	0.602854	1.761	0.280326	0.321853	0.609544
AT1G53165.2	1.962	0.239909	0.372563	0.730223	2.067	0.23259	0.361944	0.730233
AT1G53165.3	1.926	0.236065	0.37061	0.73525	2.008	0.225986	0.355711	0.734984
AT1G53165.1	1.924	0.246438	0.372366	0.720414	2.015	0.235442	0.358383	0.721801
AT2G27210.1	1.882	0.233099	0.375979	0.74555	1.792	0.21577	0.339959	0.737463
AT4G34730.1	1.677	0.287826	0.373182	0.658342	1.641	0.279934	0.386836	0.689724
AT2G47070.1	1.67	0.27542	0.372011	0.679062	1.927	0.266257	0.37258	0.692932
AT2G27210.2	1.925	0.220073	0.376111	0.766393	1.83	0.203283	0.338993	0.758159
AT2G30930.1	1.721	0.341293	0.363414	0.5714	2.817	0.472196	0.597085	0.649261
AT4G03410.1	2.348	0.175638	0.377724	0.835643	2.243	0.166391	0.377275	0.850339
AT3G14595.1	1.504	0.233192	0.362203	0.734108	1.396	0.213859	0.324223	0.724125
AT3G08530.1	2.124	0.303242	0.371335	0.634863	1.969	0.289257	0.360203	0.643924
AT5G14970.1	1.627	0.335242	0.366784	0.588835	2.17	0.387954	0.493616	0.653829
AT2G41160.1	1.947	0.234239	0.399722	0.763771	2.041	0.218339	0.379638	0.770583
AT5G15810.1	1.736	0.252568	0.372168	0.712375	1.912	0.23668	0.358482	0.721167
AT5G56340.1	1.891	0.271858	0.368323	0.679172	1.596	0.252542	0.365223	0.706358
AT1G21200.1	1.744	0.233139	0.374993	0.745129	1.834	0.250874	0.398895	0.740125
AT2G27950.1	1.666	0.27342	0.373553	0.683201	1.465	0.241679	0.328026	0.681694
AT5G01390.2	1.999	0.231488	0.383982	0.755243	1.92	0.206209	0.3626	0.77244
AT2G36620.1	1.452	0.367156	0.356165	0.536772	1.743	0.350958	0.378888	0.585037
AT3G06350.1	1.575	0.26947	0.373521	0.689445	1.814	0.278982	0.380982	0.68312
AT2G35620.1	2.331	0.242419	0.378044	0.732279	2.065	0.243142	0.390657	0.742753
AT3G13310.1	1.468	0.219034	0.360099	0.755849	2.891	0.264411	0.488899	0.788228
AT2G28840.1	1.529	0.334348	0.359422	0.579867	1.681	0.344451	0.395702	0.613002
AT1G18590.1	2.205	0.233973	0.38671	0.755384	2.157	0.23054	0.380602	0.750474
AT2G28840.2	1.623	0.328149	0.366463	0.596991	1.736	0.334333	0.400604	0.630652
AT5G08139.1	1.401	0.250845	0.355803	0.699662	1.507	0.230483	0.340681	0.714022
AT2G04790.3	1.889	0.230194	0.395831	0.765183	1.997	0.230618	0.44278	0.804164
AT2G04790.2	1.768	0.229119	0.388994	0.76351	1.929	0.236522	0.43204	0.788127
AT1G21750.2	2.103	0.298434	0.374395	0.644146	1.643	0.254134	0.299708	0.6208
AT3G18230.1	2.025	0.245658	0.367797	0.717719	1.876	0.229697	0.352988	0.726444
AT1G26090.1	2.002	0.216781	0.387877	0.780154	2.523	0.206465	0.398172	0.802184
AT5G41520.1	1.652	0.360683	0.358206	0.538442	1.399	0.348406	0.380182	0.591253
AT5G41520.2	1.649	0.360728	0.359375	0.540503	1.408	0.346644	0.379286	0.592462
AT5G12200.1	1.819	0.282661	0.367183	0.662192	1.727	0.294915	0.406422	0.686875
AT4G19170.1	1.758	0.229497	0.373719	0.750655	2.478	0.22489	0.386886	0.766036
AT4G25280.1	2.03	0.28314	0.393276	0.686567	2.118	0.25376	0.358953	0.692472
AT4G22690.1	1.678	0.321042	0.370976	0.61341	2.618	0.413502	0.559977	0.679755
AT3G17800.2	1.769	0.265013	0.369203	0.69326	1.384	0.227198	0.313936	0.689698
AT4G24090.1	1.429	0.356564	0.363203	0.560756	1.755	0.384021	0.428026	0.601043
AT3G17800.1	1.76	0.274673	0.369843	0.679111	1.375	0.234823	0.313895	0.676023
AT1G77670.1	1.949	0.283017	0.384395	0.675127	1.785	0.287472	0.391745	0.682268
AT4G12900.1	1.727	0.260994	0.367313	0.69111	1.876	0.25632	0.364356	0.697672
AT4G17310.2	1.992	0.191595	0.39398	0.819204	1.711	0.172713	0.307381	0.775766
AT3G47680.1	1.806	0.26147	0.367632	0.694044	2.552	0.263788	0.402695	0.721768
AT2G01570.1	1.889	0.26719	0.371953	0.687073	1.868	0.264616	0.378179	0.700665
AT2G45960.2	1.754	0.313172	0.365503	0.61513	1.378	0.276627	0.324549	0.62311
AT3G12170.1	1.899	0.265996	0.394032	0.712775	1.83	0.265389	0.414122	0.732693
AT3G49730.1	1.828	0.277778	0.373257	0.675762	1.646	0.27042	0.348328	0.658365
AT1G20780.1	2.155	0.255742	0.369824	0.701818	2.436	0.257634	0.432278	0.756992
AT2G45960.1	1.695	0.341558	0.360654	0.571852	1.346	0.304696	0.325757	0.5823
AT1G09010.1	1.783	0.28095	0.370266	0.667854	1.972	0.272155	0.374329	0.686505
AT3G06740.1	1.579	0.263732	0.361629	0.685602	1.638	0.285031	0.389034	0.684583
AT5G05860.1	1.757	0.26339	0.370834	0.692924	1.592	0.240574	0.350197	0.709138
AT3G15260.2	2.167	0.287043	0.374534	0.658278	1.855	0.272652	0.377613	0.687044
AT2G46680.2	1.851	0.24637	0.376631	0.722544	0.659	0.133438	0.147594	0.594602
AT3G43980.1	1.844	0.30321	0.369008	0.627071	1.581	0.276111	0.349571	0.652075
AT3G60410.3	1.998	0.235918	0.368948	0.732799	1.957	0.225698	0.352162	0.732835
AT3G60410.2	2.063	0.226255	0.371161	0.750166	2.03	0.217641	0.356849	0.750991
AT2G17840.1	2.164	0.327282	0.362574	0.590909	1.488	0.249087	0.271973	0.586418
AT2G01640.1	1.535	0.260042	0.364924	0.692494	1.698	0.258677	0.378969	0.710525
AT1G73440.1	1.858	0.224044	0.376317	0.759787	1.595	0.18446	0.316831	0.770753
AT5G07440.1	1.605	0.282121	0.357612	0.653614	2.147	0.318263	0.472243	0.716146
AT4G14040.1	1.536	0.287486	0.365012	0.654905	1.968	0.324071	0.429131	0.670501
AT5G07440.3	1.449	0.249107	0.360464	0.70728	2.492	0.253806	0.474926	0.794896
AT5G07440.2	1.586	0.290268	0.358102	0.642449	2.104	0.332484	0.470106	0.696906
AT3G18680.1	1.537	0.31812	0.360247	0.604764	1.808	0.327699	0.363575	0.597269
AT1G64490.1	1.582	0.241502	0.367819	0.725966	1.642	0.262053	0.361557	0.687123
AT1G52320.3	1.991	0.241536	0.385559	0.743081	1.642	0.228102	0.34031	0.719084
AT2G17870.1	1.55	0.331397	0.356854	0.581694	1.402	0.300682	0.328987	0.588656
AT1G32415.1	2.021	0.193466	0.379608	0.808368	2.289	0.180213	0.381033	0.832175
AT3G08510.1	1.786	0.344176	0.358359	0.564019	2.117	0.365681	0.398188	0.588343
AT1G68300.1	1.503	0.298412	0.367453	0.641043	1.554	0.267599	0.36512	0.684501
AT1G70520.1	1.58	0.307223	0.371648	0.632558	2.063	0.331994	0.431903	0.662838
AT5G64070.1	2.146	0.264718	0.370502	0.688259	2.11	0.253899	0.346111	0.680814
AT1G04240.1	1.91	0.311015	0.368397	0.621074	2.443	0.330568	0.425316	0.655775
AT1G01510.1	1.738	0.266007	0.369125	0.686242	1.844	0.259471	0.373695	0.70366
AT3G08510.3	1.829	0.321843	0.359441	0.594469	1.799	0.347269	0.397711	0.611255
AT5G19530.1	1.72	0.305241	0.372408	0.638228	3.223	0.365204	0.576102	0.734954
AT2G34560.2	1.451	0.270668	0.359493	0.673524	1.459	0.246414	0.337353	0.68659
AT2G34560.1	1.432	0.273771	0.358005	0.667149	1.441	0.247581	0.33559	0.682885
AT1G17210.1	2.108	0.251182	0.374227	0.713271	1.786	0.245099	0.341922	0.689028
AT2G32710.2	1.807	0.214756	0.365234	0.764859	1.889	0.210185	0.366651	0.769061
AT3G28160.1	1.981	0.229043	0.374995	0.749531	1.71	0.201732	0.305842	0.723761
AT2G32710.1	1.814	0.218419	0.366272	0.760161	1.692	0.20235	0.354073	0.770723
AT1G12430.1	2.111	0.26716	0.379807	0.698556	2.032	0.267451	0.389686	0.706377
AT4G29430.1	1.586	0.268748	0.366709	0.6818	1.919	0.288035	0.385918	0.671372
AT1G24793.1	1.565	0.27806	0.362473	0.661817	1.882	0.263787	0.377149	0.700496
AT1G24793.2	1.683	0.27632	0.367801	0.669409	1.72	0.262552	0.379346	0.705136
AT5G44450.1	1.573	0.25791	0.367501	0.701954	1.779	0.246037	0.361716	0.710937
AT5G44190.1	1.549	0.279117	0.369983	0.672354	1.678	0.267006	0.367959	0.687836
AT2G32730.1	1.936	0.294336	0.367638	0.645779	1.711	0.29591	0.384644	0.664122
AT1G11360.2	1.928	0.276794	0.372729	0.671662	1.781	0.285392	0.420091	0.714574
AT4G23570.2	1.418	0.294504	0.360958	0.640986	1.801	0.302004	0.443622	0.712222
AT4G23570.3	1.445	0.287587	0.360083	0.650008	1.833	0.294246	0.440306	0.718567
AT2G31810.2	1.899	0.332523	0.354329	0.575511	2.094	0.396939	0.462501	0.617893
AT4G23570.1	1.421	0.289915	0.361443	0.648368	1.796	0.299251	0.442207	0.714718
AT5G17020.2	2.241	0.244883	0.38055	0.72982	1.951	0.24447	0.386486	0.73778
AT5G17020.1	2.242	0.245558	0.380629	0.729055	1.96	0.248022	0.389372	0.735408
AT5G57880.1	2.062	0.172433	0.392373	0.850572	2.872	0.173019	0.463551	0.885479
AT4G26270.1	1.671	0.250335	0.373628	0.718717	1.647	0.24414	0.357299	0.711285
AT4G15450.1	1.849	0.267612	0.371471	0.691029	1.395	0.246412	0.304875	0.64304
AT1G48600.1	1.779	0.353317	0.360101	0.558471	1.543	0.343935	0.35681	0.566169
AT3G07360.2	1.541	0.298765	0.368668	0.64385	2.286	0.318659	0.449233	0.695489
AT3G07360.3	1.51	0.302829	0.367001	0.635938	2.287	0.32257	0.450948	0.692006
AT3G07360.1	1.549	0.303192	0.367956	0.636678	2.261	0.321061	0.445378	0.688826
AT3G21200.1	1.784	0.318201	0.369345	0.613011	2.201	0.357734	0.484791	0.676759
AT1G67325.2	2.073	0.224873	0.368949	0.753979	1.977	0.231093	0.396855	0.768905
AT1G67325.1	1.977	0.276418	0.375287	0.680228	1.87	0.282389	0.405961	0.701837
AT2G27330.1	1.467	0.242392	0.367965	0.723272	1.454	0.21587	0.336018	0.731445
AT1G73110.1	1.756	0.300489	0.367658	0.638182	2.213	0.315724	0.441079	0.693303
AT5G49760.1	1.613	0.284439	0.370424	0.664618	2.372	0.303279	0.4588	0.723777
AT4G25360.1	2.318	0.221452	0.395157	0.776516	2.293	0.212064	0.375641	0.777181
AT4G25360.2	2.318	0.216548	0.393652	0.783154	2.304	0.206703	0.375055	0.785344
AT1G71860.2	2.04	0.268611	0.372344	0.686163	1.83	0.295289	0.434036	0.713871
AT1G71860.3	2.015	0.251738	0.370046	0.710312	2.17	0.284728	0.439639	0.731662
AT1G71860.1	2.008	0.274355	0.371833	0.677872	2.127	0.306004	0.441385	0.705758
AT3G06868.1	1.698	0.238376	0.366806	0.729861	2.073	0.264645	0.423431	0.743143
AT4G00300.2	1.679	0.278259	0.367708	0.666481	2.024	0.278068	0.405922	0.712502
AT1G61450.1	1.574	0.273904	0.375041	0.684478	1.951	0.293041	0.442279	0.7208
AT3G47000.1	1.845	0.283625	0.368147	0.658695	1.697	0.271104	0.361404	0.671675
AT3G63190.1	1.59	0.37834	0.365081	0.534912	1.812	0.421308	0.460215	0.590947
AT2G46690.1	1.484	0.252233	0.374453	0.719141	1.243	0.211388	0.318389	0.721467
AT2G39990.1	1.506	0.270212	0.365434	0.681575	1.881	0.263158	0.374205	0.700684
AT3G54670.3	1.875	0.287335	0.366533	0.652857	1.845	0.286665	0.349915	0.63542
AT1G10820.2	1.664	0.234757	0.365078	0.733236	1.679	0.228888	0.366228	0.742301
AT4G18810.2	1.644	0.26797	0.365566	0.682732	1.75	0.268229	0.349581	0.664109
AT5G39830.1	1.622	0.284033	0.363978	0.656561	1.77	0.303769	0.423881	0.693376
AT5G39830.2	1.622	0.273261	0.362434	0.670777	1.851	0.292898	0.419509	0.703376
AT4G32260.1	1.653	0.319176	0.357774	0.599642	1.5	0.310908	0.374067	0.631759
AT1G59900.1	1.493	0.315853	0.350869	0.591915	1.432	0.308273	0.338313	0.592693
AT2G43235.1	1.743	0.24649	0.370811	0.721128	1.971	0.229889	0.37469	0.750124
AT5G44320.1	1.795	0.269428	0.370641	0.685095	2.075	0.277825	0.388921	0.692708
AT5G47890.1	1.414	0.356909	0.364857	0.560313	1.377	0.322154	0.331587	0.563136
AT1G63980.2	1.924	0.325377	0.355137	0.587274	1.571	0.327736	0.359961	0.592475
AT2G34357.1	2.416	0.246816	0.377019	0.722944	2.749	0.248259	0.401874	0.746062
AT3G01090.3	1.785	0.244876	0.368511	0.716888	1.997	0.258346	0.392713	0.725171
AT4G32720.1	1.593	0.321191	0.357426	0.597344	1.746	0.319156	0.362505	0.605398
AT4G23820.1	1.579	0.358909	0.357625	0.54648	1.968	0.400008	0.457359	0.610861
AT2G47980.1	2.057	0.249313	0.369593	0.713134	1.873	0.238344	0.342745	0.701386
AT4G32720.2	1.617	0.307828	0.359818	0.619471	1.781	0.307355	0.368667	0.629621
AT3G49645.1	2.225	0.247442	0.384969	0.727309	2.341	0.283746	0.462644	0.746047
AT3G56990.1	1.968	0.281388	0.37587	0.669339	1.905	0.278356	0.391132	0.691624
AT5G62200.1	1.547	0.261513	0.370173	0.697324	1.56	0.230885	0.336777	0.709735
AT4G01560.1	1.66	0.27112	0.371099	0.682998	1.844	0.240528	0.335752	0.685851
AT3G57870.1	1.721	0.284188	0.366385	0.652712	1.754	0.321831	0.41966	0.663835
AT5G25780.1	1.848	0.289148	0.372513	0.656478	1.74	0.297181	0.396633	0.67443
AT1G54060.1	1.468	0.290366	0.373074	0.660554	1.663	0.279913	0.37286	0.675043
AT3G55270.1	2.217	0.242559	0.378239	0.732205	2.287	0.244446	0.401562	0.75151
AT3G62010.1	1.575	0.283494	0.366295	0.660102	2.272	0.304356	0.409298	0.675151
AT1G53890.3	2	0.195132	0.385045	0.813905	3.177	0.246603	0.529809	0.833048
AT1G56045.1	1.962	0.330696	0.389892	0.620039	1.979	0.327736	0.387642	0.619572
AT1G53890.2	1.932	0.219595	0.37931	0.770478	3.246	0.265439	0.541653	0.817957
AT4G26710.1	1.607	0.286801	0.360827	0.64479	1.466	0.261476	0.323338	0.641143
AT5G15870.1	1.925	0.232324	0.375908	0.747661	1.73	0.214212	0.334808	0.733446
AT4G26710.2	1.699	0.287788	0.364389	0.643023	1.569	0.268609	0.34349	0.655325
AT5G55160.1	1.582	0.309719	0.349685	0.601858	1.494	0.355828	0.401921	0.606758
AT1G53890.1	1.66	0.268232	0.372047	0.691301	2.962	0.33145	0.555585	0.755688
AT5G55160.2	1.669	0.280834	0.361764	0.659201	1.572	0.321855	0.414851	0.664222
AT1G62430.1	2.103	0.224976	0.384466	0.764077	1.713	0.199338	0.352915	0.777654
AT2G02930.1	1.837	0.195382	0.373747	0.801748	2.723	0.212669	0.426986	0.8157
AT1G30260.1	2.274	0.282169	0.382897	0.674138	1.315	0.219878	0.28999	0.666545
AT4G27230.1	1.59	0.311829	0.364187	0.617769	2.005	0.369783	0.476644	0.660552
AT4G27230.2	1.44	0.288168	0.367799	0.65816	2.208	0.329638	0.463598	0.696277
AT5G16290.1	1.746	0.290896	0.374465	0.658895	1.827	0.290535	0.397415	0.682791
AT4G34370.1	1.972	0.260877	0.385687	0.711043	1.785	0.239524	0.370182	0.731841
AT5G53340.2	2.171	0.270835	0.380204	0.690125	1.822	0.261842	0.353233	0.679255
AT1G64142.1	1.734	0.290434	0.362238	0.643405	1.539	0.271463	0.334319	0.639061
AT4G34370.2	1.989	0.251578	0.385898	0.725466	1.802	0.232922	0.37195	0.744312
AT1G51980.2	1.575	0.289625	0.361191	0.64584	1.819	0.290909	0.378148	0.661762
AT3G05560.3	1.448	0.260978	0.356035	0.68183	1.552	0.268554	0.375282	0.695556
AT5G18230.2	1.828	0.290028	0.362711	0.64464	1.811	0.296542	0.374355	0.652555
AT5G18230.1	1.826	0.290816	0.362971	0.643709	1.826	0.298722	0.376612	0.651892
AT1G55690.3	1.78	0.25655	0.373958	0.706399	1.575	0.218025	0.325604	0.717497
AT5G64940.2	1.671	0.293495	0.373859	0.654899	1.35	0.253573	0.310782	0.639753
AT5G64940.1	1.664	0.295492	0.372963	0.650963	1.344	0.25598	0.311087	0.636217
AT2G27385.2	1.722	0.254779	0.374753	0.715948	2.447	0.257384	0.416474	0.748734
AT2G27385.3	1.722	0.254752	0.374433	0.715585	2.453	0.257952	0.41756	0.748928
AT2G27385.1	1.829	0.367107	0.366624	0.547244	2.186	0.37337	0.407674	0.585448
AT4G28440.1	1.355	0.273691	0.362829	0.67493	1.384	0.2452	0.324071	0.667323
AT1G26880.1	1.639	0.34424	0.377001	0.590132	2.146	0.361607	0.418961	0.60977
AT1G26880.2	1.763	0.306404	0.38704	0.652404	2.019	0.323389	0.419114	0.661219
AT5G45100.1	2.004	0.28415	0.382465	0.677442	1.582	0.268579	0.358869	0.675168
AT3G56480.1	1.759	0.281424	0.363403	0.65988	1.794	0.27472	0.380429	0.68828
AT1G78630.1	1.736	0.386192	0.35911	0.515807	2.26	0.419204	0.441066	0.57224
AT1G65845.1	1.664	0.275525	0.361756	0.667155	2.13	0.313513	0.481061	0.723178
AT5G21170.1	1.748	0.321173	0.368942	0.610251	2.842	0.41027	0.563802	0.68562
AT4G00740.1	1.944	0.239983	0.368293	0.726887	1.846	0.232963	0.370039	0.740814
AT4G30160.1	1.997	0.243481	0.375165	0.729694	1.914	0.235513	0.356693	0.722798
AT2G44530.2	1.616	0.303866	0.366807	0.631689	1.977	0.291783	0.368456	0.64993
AT2G44530.1	1.599	0.302921	0.36587	0.632264	1.961	0.292338	0.366662	0.647087
AT5G40670.1	1.637	0.278542	0.365073	0.665977	1.874	0.262949	0.367624	0.691012
AT2G42160.1	1.582	0.254917	0.371944	0.7086	1.871	0.24945	0.362255	0.706611
AT1G05850.1	1.581	0.392074	0.351225	0.500522	1.616	0.403303	0.388793	0.535729
AT3G47670.1	2.1	0.237347	0.390592	0.746449	2.183	0.242108	0.39113	0.747631
AT5G53340.1	2.164	0.265265	0.37993	0.697518	1.821	0.252035	0.351866	0.693065
AT2G20630.2	1.537	0.276935	0.36354	0.669973	1.746	0.27491	0.385674	0.696542
AT5G28330.1	2.698	0.171619	0.409558	0.860493	2.545	0.194747	0.439902	0.848996
AT2G20630.1	1.454	0.354235	0.354641	0.552042	1.588	0.331454	0.366924	0.596637
AT2G21160.1	1.561	0.290646	0.366846	0.651336	1.592	0.287571	0.340827	0.622483
AT2G21160.2	1.608	0.275469	0.365717	0.671917	1.347	0.272858	0.346622	0.656259
AT2G25520.1	1.862	0.279432	0.375424	0.670007	1.692	0.232947	0.331777	0.69912
AT1G32240.1	1.868	0.222058	0.378669	0.763702	1.528	0.192497	0.341741	0.779846
AT5G04740.2	1.771	0.24243	0.366821	0.723831	1.676	0.229117	0.37434	0.751404
AT5G04740.1	1.753	0.28807	0.365253	0.651954	1.759	0.295811	0.407795	0.686754
AT3G06580.1	1.678	0.29379	0.368639	0.6474	1.676	0.275216	0.366804	0.67278
AT3G10350.1	1.874	0.250033	0.368711	0.714977	1.671	0.250208	0.377514	0.724915
AT1G21770.1	1.422	0.249193	0.353492	0.696209	1.217	0.244155	0.314822	0.662519
AT1G64670.1	1.743	0.24961	0.383049	0.729216	1.551	0.240281	0.367103	0.727019
AT1G31070.2	1.912	0.264907	0.377929	0.698965	1.378	0.238962	0.307522	0.659471
AT5G61020.2	1.752	0.349652	0.363057	0.565557	1.677	0.335458	0.372345	0.596112
AT5G45060.1	2.207	0.228379	0.383589	0.756679	1.936	0.211423	0.362439	0.767011
AT1G77810.1	1.886	0.21727	0.365093	0.760628	1.303	0.170928	0.271499	0.740431
AT3G11710.1	1.649	0.331542	0.355451	0.577791	1.812	0.338826	0.376483	0.59722
AT1G77810.2	1.825	0.243382	0.370037	0.72468	1.291	0.192267	0.282388	0.711186
AT5G42070.1	1.616	0.283499	0.368766	0.661047	1.682	0.279093	0.394849	0.69638
AT3G50550.1	1.57	0.273044	0.36192	0.666463	1.954	0.264971	0.360259	0.671418
AT3G11770.1	1.906	0.244849	0.389543	0.737574	2.632	0.229804	0.420531	0.776696
AT1G64650.2	2.581	0.243238	0.384232	0.736402	1.759	0.232059	0.338082	0.705877
AT1G59980.1	2.545	0.196819	0.3854	0.806453	2.215	0.194139	0.391412	0.814556
AT1G03630.1	1.485	0.354009	0.350937	0.546468	1.697	0.361959	0.398809	0.592261
AT3G03870.2	1.822	0.227879	0.376162	0.752652	2.342	0.224663	0.399594	0.777762
AT3G03870.1	1.776	0.240775	0.38154	0.738296	2.226	0.231356	0.393987	0.762929
AT5G66140.1	1.609	0.262258	0.375698	0.70458	1.63	0.278642	0.397546	0.700986
AT2G17230.1	1.73	0.303513	0.370065	0.631818	2.047	0.347299	0.457295	0.667055
AT3G53668.1	1.579	0.250334	0.363762	0.708442	1.646	0.238758	0.389193	0.750881
AT4G21090.3	1.716	0.247582	0.365255	0.713417	1.617	0.234508	0.365216	0.736707
AT4G21090.2	1.716	0.24658	0.363017	0.712027	1.588	0.234805	0.356756	0.726715
AT4G21090.1	1.716	0.246835	0.364207	0.713331	1.583	0.233221	0.356013	0.728591
AT4G27840.1	1.88	0.20368	0.367138	0.785034	1.365	0.159617	0.274927	0.769398
AT2G28940.1	1.643	0.262013	0.377776	0.704876	1.645	0.243138	0.375627	0.729425
AT2G28940.2	1.638	0.266967	0.380714	0.70042	1.685	0.252506	0.393822	0.734265
AT3G53740.3	1.574	0.401061	0.364871	0.505611	1.701	0.41229	0.402148	0.538965
AT5G35590.1	1.414	0.310257	0.363589	0.622155	1.791	0.317692	0.37552	0.622126
AT4G11010.1	1.542	0.313522	0.348762	0.591084	1.426	0.286595	0.327826	0.610887
AT3G54690.1	1.742	0.254848	0.383413	0.720795	1.409	0.246276	0.348376	0.697859
AT1G29530.1	1.968	0.258171	0.376311	0.706391	1.7	0.249811	0.377418	0.719958
AT5G48760.1	1.61	0.3241	0.371925	0.608168	1.648	0.321501	0.375032	0.617904
AT3G04020.1	1.671	0.273642	0.378778	0.685309	1.733	0.288717	0.395155	0.685668
AT5G48760.2	1.618	0.317404	0.371688	0.616978	1.657	0.316029	0.374329	0.62451
AT1G43710.1	1.724	0.301307	0.374656	0.643139	1.995	0.288497	0.375053	0.662064
AT4G31010.1	1.718	0.25788	0.370185	0.701365	1.737	0.26999	0.400316	0.714397
AT2G44525.1	1.611	0.251064	0.371381	0.712838	1.625	0.223553	0.346036	0.729912
AT1G74850.1	1.782	0.307103	0.36505	0.622968	1.563	0.292233	0.350266	0.629451
AT3G53740.2	1.575	0.388259	0.365168	0.52217	1.713	0.405968	0.409259	0.554596
AT3G51640.2	1.721	0.253038	0.377117	0.716037	1.675	0.239659	0.372718	0.734333
AT5G47180.1	1.417	0.266146	0.354854	0.673086	1.732	0.277215	0.37264	0.677582
AT5G47180.2	1.438	0.277687	0.356264	0.655983	1.785	0.28635	0.380128	0.671988
AT3G51640.1	1.723	0.26311	0.373866	0.697984	1.837	0.26512	0.372297	0.695558
AT2G02360.1	1.694	0.278486	0.367415	0.666505	2.029	0.323662	0.430659	0.668945
AT5G50580.1	1.761	0.267535	0.366496	0.684898	1.849	0.276221	0.390833	0.695992
AT5G50580.2	1.696	0.270034	0.35916	0.672255	1.782	0.284524	0.392072	0.686765
AT5G38895.1	2.061	0.196851	0.379402	0.800347	1.96	0.178493	0.3408	0.79835
AT5G20840.1	2.086	0.239949	0.382582	0.739423	2.211	0.250998	0.389387	0.731187
AT1G22400.1	1.675	0.313246	0.361078	0.611361	1.44	0.246837	0.298026	0.628625
AT1G20020.2	1.925	0.395704	0.360218	0.505082	1.824	0.458458	0.437158	0.531959
AT3G50550.2	1.573	0.241596	0.3783	0.734063	1.867	0.212883	0.329093	0.712755
AT4G39970.1	1.501	0.259514	0.360267	0.690327	2.189	0.307459	0.475199	0.730696
AT5G13560.1	1.7	0.246233	0.367057	0.72086	1.649	0.249689	0.382305	0.730473
AT1G20020.3	1.936	0.419024	0.353045	0.471627	1.84	0.486304	0.442171	0.51045
AT5G05360.2	1.601	0.251174	0.376088	0.720177	2.222	0.273873	0.460587	0.761026
AT3G59990.3	1.65	0.288376	0.371552	0.659286	1.538	0.275409	0.355971	0.658873
AT5G05360.1	1.519	0.270869	0.370287	0.683661	2.081	0.302889	0.446851	0.711516
AT5G10980.1	1.377	0.293195	0.354235	0.634102	1.544	0.310416	0.372763	0.630626
AT4G28100.1	1.604	0.258685	0.368087	0.697681	1.804	0.254609	0.389526	0.726314
AT2G23290.1	1.771	0.369778	0.366337	0.541359	2.242	0.426747	0.50627	0.619939
AT1G56610.2	2.608	0.193532	0.395455	0.817443	2.256	0.157782	0.365483	0.852825
AT4G03260.1	1.857	0.254627	0.371854	0.709405	1.465	0.238898	0.33531	0.695418
AT3G44340.1	2.425	0.248032	0.371941	0.716956	1.681	0.23218	0.334126	0.702504
AT3G44340.2	2.536	0.243102	0.37851	0.730685	1.753	0.227057	0.33871	0.716502
AT2G29530.2	1.871	0.337247	0.380163	0.600002	1.559	0.323794	0.369535	0.609235
AT5G40610.1	1.549	0.269936	0.360626	0.671633	1.955	0.312446	0.466105	0.71785
AT2G16280.1	1.905	0.311876	0.370122	0.621587	2.138	0.320791	0.424135	0.6658
AT4G08980.3	1.573	0.26244	0.368637	0.694026	1.53	0.231928	0.300553	0.661178
AT4G29070.1	2.086	0.286591	0.382227	0.669811	1.415	0.247251	0.339163	0.686879
AT4G30190.1	1.769	0.305688	0.364894	0.626639	1.684	0.263352	0.311913	0.621499
AT4G30190.2	1.775	0.299103	0.364187	0.635049	1.709	0.260285	0.314261	0.630155
AT2G20230.1	2.188	0.264413	0.369426	0.685256	1.978	0.274649	0.416195	0.724088
AT1G06510.1	1.977	0.264118	0.372925	0.692291	2.275	0.27378	0.403646	0.710783
AT3G13480.1	1.505	0.309771	0.362459	0.618993	1.421	0.256951	0.305331	0.624561
AT2G32520.1	1.54	0.295283	0.369188	0.647711	1.424	0.254234	0.337151	0.672861
AT2G36160.1	1.339	0.3469	0.348152	0.551853	1.536	0.354964	0.378919	0.578765
AT5G19450.1	1.848	0.294927	0.361475	0.63889	1.558	0.301204	0.362267	0.630533
AT1G55980.1	1.968	0.239233	0.375816	0.735486	1.665	0.221009	0.371183	0.761748
AT2G38650.2	1.874	0.26743	0.371114	0.686738	2.098	0.250205	0.33144	0.667877
AT5G46730.1	1.403	0.363724	0.355065	0.540408	1.209	0.300472	0.308298	0.560908
AT5G46730.2	1.389	0.348013	0.360139	0.566452	1.304	0.289291	0.302251	0.568081
AT1G80030.1	1.754	0.305807	0.360704	0.615811	2.429	0.330365	0.414897	0.644904
AT1G56510.1	2.242	0.243552	0.387545	0.737535	2.351	0.246458	0.422432	0.763567
AT5G25560.4	1.781	0.246986	0.363841	0.710553	2.088	0.246211	0.376297	0.725196
AT1G80030.2	1.802	0.294772	0.363176	0.633949	2.452	0.32166	0.414583	0.655763
AT5G25560.2	1.532	0.259616	0.360251	0.690564	1.746	0.242303	0.349291	0.703953
AT3G54810.1	1.65	0.290788	0.36915	0.652299	1.779	0.290683	0.399233	0.685717
AT3G54810.2	1.986	0.313433	0.366828	0.615001	1.664	0.310093	0.384161	0.642963
AT5G25560.1	1.533	0.258983	0.359747	0.69154	1.755	0.246087	0.352169	0.70111
AT3G22630.1	1.758	0.284898	0.371703	0.66405	2.005	0.294871	0.436356	0.713344
AT2G31360.1	1.624	0.310382	0.356316	0.610917	1.585	0.316796	0.377277	0.62796
AT5G09250.2	1.559	0.229433	0.366833	0.747262	1.741	0.224757	0.37727	0.761448
AT2G32970.2	2.446	0.218264	0.380918	0.770432	1.633	0.186736	0.330093	0.778744
AT5G09250.1	1.553	0.267855	0.366799	0.685332	1.648	0.244956	0.35373	0.701706
AT1G18840.1	1.824	0.221616	0.372958	0.76179	1.618	0.210068	0.342017	0.751034
AT1G20950.1	1.981	0.277763	0.380537	0.680766	1.566	0.254984	0.332675	0.663248
AT1G18840.2	1.804	0.220719	0.37078	0.761288	1.611	0.210743	0.341249	0.748861
AT1G78660.3	1.7	0.242383	0.37219	0.726748	2.081	0.242988	0.381501	0.733194
AT1G78660.2	1.666	0.237997	0.369614	0.731654	2.056	0.241406	0.383466	0.738775
AT1G78660.1	1.674	0.249701	0.37085	0.713577	2.031	0.248467	0.377907	0.721263
AT1G78610.1	1.884	0.244804	0.375873	0.727517	1.614	0.205216	0.287374	0.68984
AT1G80010.1	1.643	0.242267	0.370812	0.727077	1.861	0.225247	0.336244	0.716643
AT2G36420.1	1.563	0.331386	0.361669	0.587639	2.003	0.358268	0.428333	0.624123
AT3G22310.1	1.713	0.287606	0.367325	0.654301	1.735	0.275284	0.347641	0.652241
AT4G08980.5	1.435	0.295112	0.362024	0.637208	1.508	0.268351	0.306782	0.607272
AT5G39040.1	1.604	0.255954	0.369078	0.702086	1.696	0.222786	0.320739	0.701654
AT1G74740.1	1.876	0.249421	0.377985	0.720374	1.77	0.215627	0.33813	0.734273
AT4G11211.1	2.592	0.223416	0.444883	0.801284	3.337	0.245565	0.578952	0.856508
AT1G60000.2	1.465	0.240596	0.364224	0.727127	1.512	0.239601	0.373679	0.738594
AT1G60000.1	1.638	0.292719	0.366696	0.648661	1.62	0.275484	0.363922	0.672753
AT4G02820.1	1.886	0.240377	0.37359	0.732255	2.277	0.248101	0.423184	0.761402
AT1G68660.2	1.555	0.251832	0.356991	0.697272	1.335	0.26433	0.343135	0.663314
AT1G68660.1	1.55	0.276831	0.358217	0.659914	1.351	0.286234	0.350407	0.638528
AT1G76780.1	1.602	0.340166	0.371184	0.587578	1.529	0.324519	0.355327	0.590638
AT1G10900.1	2.122	0.239409	0.373751	0.732173	1.719	0.22939	0.347753	0.72389
AT4G22190.1	1.745	0.286258	0.382848	0.673525	1.858	0.288074	0.406318	0.697733
AT3G06700.2	1.574	0.354429	0.363801	0.555346	1.6	0.344351	0.365797	0.576328
AT4G14410.2	1.74	0.273446	0.365825	0.675526	1.707	0.253736	0.336643	0.670435
AT4G14410.1	1.807	0.243416	0.366175	0.722747	1.772	0.227645	0.338482	0.717007
AT5G55300.1	1.83	0.312147	0.366035	0.616986	1.816	0.306897	0.382368	0.644572
AT3G45140.1	1.82	0.359122	0.348147	0.532058	1.453	0.296843	0.282436	0.526682
AT5G55300.3	1.835	0.300357	0.368173	0.635146	1.94	0.293876	0.39267	0.673644
AT5G55300.2	1.882	0.304821	0.366239	0.627354	1.857	0.302712	0.382113	0.649314
AT4G12880.2	1.506	0.236183	0.371172	0.738627	1.637	0.224817	0.370789	0.756561
AT4G33865.1	1.67	0.343787	0.359281	0.562004	1.692	0.341661	0.415076	0.632898
AT4G12880.1	1.448	0.281442	0.373511	0.673133	1.497	0.243037	0.353927	0.708865
AT3G63170.1	1.732	0.258618	0.369803	0.700791	2.025	0.231299	0.345732	0.715696
AT5G56150.2	1.548	0.258744	0.369259	0.702194	1.313	0.208591	0.255856	0.636127
AT5G61530.1	1.483	0.296141	0.37032	0.648916	1.728	0.272953	0.369497	0.679988
AT1G23052.1	2.121	0.237528	0.371249	0.731399	2.18	0.271667	0.464313	0.768042
AT2G43550.1	1.454	0.306689	0.359216	0.619474	2.162	0.339367	0.442572	0.66442
AT5G42940.1	2.193	0.257158	0.3795	0.710724	2.06	0.256672	0.4179	0.745049
AT1G15130.1	1.951	0.286051	0.367268	0.654949	1.544	0.276283	0.359658	0.665172
AT3G02750.1	2.133	0.22608	0.386851	0.762975	2.379	0.205023	0.367302	0.778543
AT5G58440.1	2.073	0.306958	0.368756	0.626654	1.757	0.301108	0.371527	0.640335
AT3G13740.2	1.576	0.277167	0.376759	0.683346	1.84	0.272982	0.405267	0.716884
AT3G27560.1	1.89	0.209754	0.380831	0.787046	1.975	0.210464	0.382643	0.78775
AT4G13020.4	1.831	0.237972	0.376407	0.73776	1.323	0.205626	0.305099	0.717394
AT1G25380.1	1.798	0.274202	0.374359	0.679766	1.474	0.238525	0.329687	0.687078
AT5G28450.1	1.525	0.260663	0.365468	0.695477	1.676	0.284165	0.442586	0.739651
AT5G32470.1	1.935	0.247384	0.38081	0.725851	1.838	0.21508	0.35451	0.75318
AT2G04030.2	1.8	0.363154	0.352346	0.530722	1.715	0.3702	0.376598	0.557994
AT2G04030.1	1.795	0.366551	0.352054	0.527001	1.707	0.37696	0.377998	0.55165
AT2G40950.1	1.475	0.231057	0.363335	0.737566	1.52	0.199252	0.304611	0.726683
AT5G08180.2	1.56	0.260909	0.368324	0.698995	1.849	0.265342	0.381655	0.7042
AT2G01720.1	1.763	0.297837	0.375219	0.650586	2.115	0.297952	0.389086	0.665246
AT3G04120.1	1.768	0.304709	0.366455	0.629527	1.648	0.305335	0.361664	0.625557
AT5G64760.1	2.092	0.233425	0.372645	0.741916	1.985	0.232001	0.387315	0.755732
AT4G25640.2	2.051	0.257528	0.376665	0.709575	1.551	0.213319	0.315005	0.714431
AT3G48070.2	1.634	0.24901	0.362229	0.707762	1.476	0.242383	0.363937	0.72266
AT3G48070.1	1.672	0.25657	0.36289	0.695607	1.512	0.247444	0.364432	0.714183
AT4G25640.1	2.053	0.275232	0.378227	0.684053	1.528	0.230474	0.31483	0.683049
AT1G74800.1	2.375	0.23014	0.377956	0.749207	2.595	0.234803	0.393713	0.751665
AT1G11400.2	1.447	0.304287	0.359642	0.624484	1.613	0.308661	0.371286	0.62956
AT2G39725.2	1.982	0.224902	0.38761	0.767298	1.813	0.214811	0.347227	0.746285
AT1G11400.1	1.451	0.302891	0.359395	0.625412	1.627	0.30369	0.372204	0.636668
AT5G17710.1	1.855	0.337088	0.361092	0.572516	2.07	0.366618	0.415162	0.600855
AT5G17710.2	1.841	0.33637	0.3576	0.568383	2.055	0.371682	0.408924	0.587506
AT5G35790.1	1.88	0.316244	0.361705	0.606983	1.98	0.349961	0.431611	0.640981
AT3G48090.1	1.901	0.303073	0.373598	0.638284	2.159	0.326091	0.445737	0.68254
AT3G48090.2	1.894	0.295666	0.373307	0.648717	2.147	0.321538	0.444838	0.687431
AT4G26860.2	1.845	0.266561	0.372203	0.690532	2.135	0.323186	0.463843	0.704636
AT5G57685.1	1.88	0.273041	0.373832	0.681111	1.838	0.305757	0.418599	0.685575
AT4G10320.1	1.832	0.276791	0.366669	0.669098	1.782	0.268843	0.368866	0.686892
AT5G10690.1	1.632	0.276643	0.362487	0.665211	1.751	0.266408	0.386842	0.707627
AT5G17770.1	1.448	0.28928	0.367979	0.655072	1.838	0.274024	0.382755	0.693211
AT1G43890.3	1.649	0.257376	0.370766	0.701793	1.531	0.263681	0.37039	0.695605
AT5G54970.1	1.535	0.230982	0.372042	0.747182	1.887	0.235007	0.417712	0.778144
AT5G61530.2	1.488	0.289961	0.369548	0.656582	1.738	0.264255	0.369645	0.693016
AT2G17550.1	2.079	0.25105	0.371232	0.712237	2.469	0.257401	0.401335	0.73232
AT1G17510.1	1.488	0.245567	0.374234	0.726454	1.523	0.233479	0.342057	0.712238
AT5G36250.1	1.848	0.237656	0.373457	0.737453	1.941	0.243451	0.393241	0.74592
AT3G20230.1	1.683	0.30855	0.364787	0.620225	1.51	0.285971	0.354897	0.643581
AT1G53040.1	2.023	0.218385	0.382514	0.773649	1.877	0.210721	0.368606	0.773672
AT5G45428.1	2.113	0.271381	0.375221	0.686323	2.075	0.270501	0.373658	0.68647
AT2G18280.1	1.648	0.271159	0.36537	0.679705	1.596	0.257114	0.345277	0.678165
AT2G18280.2	1.668	0.260867	0.364877	0.694698	1.602	0.249664	0.342014	0.686088
AT5G54630.1	1.572	0.309895	0.366201	0.623227	1.9	0.319226	0.405825	0.654611
AT2G40070.2	1.855	0.27905	0.374017	0.675044	1.739	0.267006	0.375103	0.694593
AT2G44270.1	1.91	0.273693	0.379095	0.687018	2.006	0.286233	0.403166	0.693493
AT2G44270.2	2.042	0.211796	0.371864	0.775982	2.097	0.233715	0.393897	0.761218
AT2G40070.1	1.901	0.268859	0.376597	0.693275	1.802	0.253797	0.37624	0.715355
AT5G58930.1	1.56	0.264116	0.365432	0.690014	1.413	0.222301	0.310245	0.69426
AT3G02350.1	1.744	0.265911	0.372626	0.693243	2.13	0.258084	0.372371	0.702955
AT2G03690.1	1.743	0.259519	0.362827	0.689966	1.555	0.234103	0.324906	0.69071
AT4G18280.1	1.33	0.287927	0.362375	0.653968	0.879	0.190865	0.208456	0.586578
AT3G12260.1	1.459	0.249387	0.355845	0.69901	1.97	0.274418	0.398121	0.695846
AT2G44210.1	1.648	0.322851	0.366438	0.60679	1.856	0.352511	0.437307	0.64312
AT1G32550.1	1.583	0.335049	0.365184	0.583936	1.694	0.329353	0.386504	0.615995
AT1G70600.1	1.59	0.390939	0.349249	0.498076	1.378	0.329782	0.350679	0.57931
AT2G20790.2	2.238	0.242863	0.390902	0.742377	2.103	0.221541	0.376242	0.761827
AT2G37970.1	1.397	0.311115	0.371149	0.630247	1.292	0.260768	0.302445	0.617751
AT4G39910.1	1.692	0.260089	0.362983	0.689137	1.527	0.257145	0.381744	0.719038
AT1G04985.1	1.833	0.351502	0.365438	0.562392	2.322	0.36941	0.450173	0.635234
AT2G43090.1	1.688	0.302819	0.364597	0.631053	1.551	0.332209	0.3947	0.625823
AT3G63110.1	1.926	0.242413	0.381145	0.731757	2.024	0.236759	0.406592	0.767564
AT2G43090.2	1.692	0.283409	0.359629	0.651842	1.506	0.293525	0.377254	0.659176
AT5G43310.1	2.22	0.273379	0.380691	0.689332	1.976	0.284747	0.414129	0.708413
AT5G43310.3	2.198	0.279075	0.380334	0.680557	1.955	0.289161	0.411468	0.699488
AT5G43310.2	2.207	0.27843	0.380542	0.68191	1.966	0.290004	0.41109	0.697804
AT5G43310.4	2.225	0.272223	0.380883	0.691367	1.973	0.283021	0.410686	0.70714
AT5G20910.1	2.097	0.245684	0.378386	0.72488	1.854	0.24082	0.382068	0.738749
AT3G13845.1	1.4	0.285492	0.368841	0.660261	1.726	0.285231	0.383718	0.675765
AT1G56423.1	1.718	0.251472	0.371398	0.711745	1.926	0.219976	0.357342	0.747453
AT5G40580.3	1.48	0.293476	0.362836	0.643613	1.431	0.298854	0.361678	0.633249
AT4G14490.1	2.071	0.223686	0.391031	0.773693	2.186	0.2463	0.447962	0.786876
AT5G43850.1	1.75	0.262255	0.364712	0.686738	1.557	0.26479	0.361251	0.680965
AT5G61450.1	1.724	0.238701	0.368627	0.728972	1.69	0.22605	0.353686	0.734325
AT2G05790.1	1.947	0.267314	0.373558	0.69138	2.01	0.263902	0.398801	0.723203
AT4G37480.1	1.553	0.30515	0.36426	0.626912	1.804	0.28931	0.372796	0.65942
AT5G27760.1	1.642	0.251939	0.375787	0.720733	1.14	0.207502	0.280456	0.679345
AT4G16515.1	1.55	0.199009	0.359973	0.788024	2.311	0.239948	0.43128	0.782569
AT4G17720.1	1.688	0.265177	0.375768	0.698147	1.456	0.23143	0.331253	0.702276
AT4G20440.3	1.724	0.245482	0.374246	0.729131	1.686	0.244134	0.370847	0.72465
AT3G19520.1	1.778	0.282823	0.373342	0.669379	1.869	0.287522	0.382544	0.672607
AT4G20440.2	1.677	0.282487	0.378653	0.677736	1.673	0.288367	0.390493	0.678773
AT5G49820.1	2.01	0.274715	0.374645	0.679705	2.074	0.266031	0.397181	0.715027
AT5G43870.1	1.921	0.296689	0.371802	0.644266	1.896	0.29962	0.39837	0.672624
AT5G50665.2	1.478	0.313459	0.37469	0.630929	1.195	0.277899	0.323752	0.618168
AT1G16700.1	2.161	0.293693	0.380479	0.658475	1.843	0.299947	0.39153	0.66231
AT4G32940.1	2.056	0.294382	0.366853	0.643652	1.499	0.269546	0.361858	0.678798
AT4G24290.2	2.096	0.294536	0.373432	0.649139	1.775	0.264572	0.346491	0.662567
AT2G37420.1	1.992	0.224364	0.381471	0.764451	2.099	0.230866	0.39522	0.765579
AT1G06220.1	1.811	0.282866	0.369436	0.664492	1.967	0.300275	0.406713	0.679998
AT3G01680.1	1.783	0.254687	0.366041	0.704011	1.789	0.25719	0.399182	0.734168
AT3G46540.1	1.682	0.288887	0.36164	0.644663	1.866	0.305982	0.371777	0.634782
AT1G03300.1	1.823	0.244608	0.365868	0.716555	1.824	0.239189	0.373006	0.732126
AT2G16600.2	1.549	0.330003	0.360439	0.58938	1.509	0.307856	0.35289	0.611226
ATCG01020.1	1.585	0.33909	0.366196	0.573654	1.608	0.379955	0.400819	0.561907
AT2G16600.1	1.54	0.366454	0.3544	0.536272	1.505	0.335278	0.342148	0.559506
AT1G13450.3	1.896	0.227895	0.368784	0.747954	2.093	0.229058	0.363444	0.740709
AT1G13450.2	1.811	0.236663	0.366192	0.732573	2.007	0.23514	0.36196	0.73016
AT1G13450.1	1.795	0.258184	0.367278	0.69906	1.984	0.257018	0.362976	0.695946
AT1G72750.1	1.697	0.282495	0.369857	0.667229	1.77	0.260485	0.3715	0.702463
AT5G19310.1	2.099	0.252114	0.373885	0.713956	2.163	0.245866	0.371168	0.720434
AT1G19835.2	1.61	0.288943	0.356365	0.640123	1.72	0.292416	0.354409	0.633372
AT1G73200.1	2.052	0.250443	0.377181	0.719993	2.111	0.240756	0.385392	0.743737
AT1G04400.2	1.532	0.320203	0.354839	0.595192	2.009	0.324541	0.375773	0.613629
AT1G19835.1	1.614	0.291485	0.355428	0.63475	1.723	0.291617	0.353952	0.633919
AT5G58575.1	1.695	0.240983	0.371949	0.731126	1.603	0.221561	0.331632	0.715212
AT1G17330.1	1.552	0.320352	0.362894	0.603987	1.892	0.331079	0.389727	0.620015
AT3G45620.1	1.484	0.320599	0.365648	0.608438	1.561	0.309235	0.37683	0.637081
AT3G45620.2	1.547	0.29503	0.368172	0.648064	1.612	0.281131	0.3749	0.675473
AT5G63870.2	1.695	0.253154	0.3675	0.707252	1.672	0.251189	0.364505	0.705594
AT5G63870.3	1.797	0.232611	0.369225	0.740657	1.786	0.235249	0.360859	0.72625
AT5G63870.1	1.684	0.250029	0.365571	0.710214	1.659	0.248231	0.362332	0.708107
AT1G03360.1	1.673	0.254	0.37631	0.71472	1.693	0.244212	0.381819	0.736382
AT1G21120.1	1.804	0.253432	0.375791	0.712677	3.119	0.338107	0.648498	0.802161
AT2G36910.1	2.176	0.241525	0.368475	0.725357	1.465	0.203809	0.290845	0.700117
AT5G05580.1	1.576	0.284306	0.363443	0.655688	1.726	0.280408	0.368446	0.666813
AT4G22485.1	2.431	0.279637	0.369215	0.659366	2.682	0.38672	0.511504	0.666617
AT1G43860.1	1.823	0.276188	0.367045	0.671672	1.649	0.268069	0.362903	0.678295
AT4G32600.1	2.045	0.227815	0.380849	0.755707	1.912	0.202797	0.343001	0.760061
AT5G62650.1	1.514	0.264612	0.365619	0.689707	1.997	0.248128	0.377362	0.724142
AT1G19570.2	1.591	0.333378	0.356259	0.575639	1.255	0.269508	0.274338	0.556601
AT1G19570.1	1.603	0.334781	0.354857	0.571207	1.302	0.275857	0.280368	0.554645
AT1G34010.1	1.994	0.255605	0.383962	0.715608	1.858	0.250053	0.391626	0.73546
AT2G42500.2	1.612	0.289638	0.375211	0.662339	1.666	0.27048	0.371062	0.685176
AT2G42740.1	1.67	0.25378	0.373695	0.711989	1.835	0.262277	0.398722	0.718787
AT2G46400.1	1.846	0.247429	0.378333	0.726989	1.57	0.215015	0.316351	0.713316
AT3G16240.1	1.525	0.328752	0.345929	0.565623	1.907	0.362372	0.423397	0.618033
AT2G39940.1	2.02	0.234844	0.383359	0.747701	2.114	0.234834	0.381437	0.744431
[truncated: 13,877 more rows]

## Sheet: D2
D2 Shoot Control vs. Shoot Salt Intra-Tissue Contrast Derived Statistics, 5’UTR
transcript	shoot_control_fiveprime_max	shoot_control_fiveprime_average	shoot_control_fiveprime_std	shoot_control_fiveprime_gini	shoot_salt_fiveprime_max	shoot_salt_fiveprime_average	shoot_salt_fiveprime_std	shoot_salt_fiveprime_gini
AT2G14880.1	0.997	0.140127	0.249887	0.778189	1.246	0.175367	0.273278	0.734406
AT3G62560.1	1.052	0.156656	0.287623	0.791442	1.647	0.214641	0.377556	0.776117
AT1G62780.1	1.352	0.455219	0.42655	0.523549	1.08	0.413719	0.347812	0.477285
AT2G12280.1	1.201	0.159652	0.322124	0.819219	0.689	0.118087	0.210221	0.781328
AT1G68050.1	0.671	0.120882	0.219913	0.791584	0.994	0.240029	0.27901	0.617294
AT2G22190.1	0.971	0.0917429	0.235769	0.87864	0.729	0.100857	0.205941	0.814391
AT5G62000.3	1.437	0.38098	0.382967	0.554226	1.408	0.39254	0.410426	0.574301
AT1G08650.2	1.489	0.348921	0.429875	0.641199	0.869	0.255632	0.285866	0.60308
AT3G11130.1	1.012	0.170846	0.26175	0.722392	0.803	0.132041	0.22219	0.759696
AT3G09860.1	1.177	0.14913	0.254071	0.746818	0.979	0.179065	0.268156	0.704697
AT1G04440.1	1.355	0.166329	0.309614	0.7931	1.373	0.14564	0.278764	0.803882
AT5G13090.1	1.067	0.119423	0.275629	0.857226	0.985	0.0916479	0.250136	0.890434
AT4G30810.1	0.973	0.116	0.282963	0.866499	0.792	0.151333	0.274415	0.786344
AT4G32560.1	NA	NA	NA	NA	NA	NA	NA	NA
AT5G59380.1	0.6	0.0780333	0.163556	0.826698	0.895	0.119433	0.229297	0.791618
AT3G60530.1	1.434	0.144297	0.274056	0.787651	1.213	0.171149	0.28345	0.745061
AT1G31730.1	1.684	0.26534	0.405205	0.726632	1.539	0.248347	0.348636	0.688961
AT5G19540.1	1.301	0.380323	0.422246	0.597975	1.21	0.372968	0.379869	0.561801
AT1G11750.1	1.524	0.2778	0.37937	0.67901	1.374	0.287667	0.352643	0.639359
AT3G11500.1	1.326	0.345103	0.390147	0.604497	1.44	0.294207	0.435152	0.719011
AT5G52780.1	0.339	0.0236111	0.0789804	0.921961	0.492	0.042	0.117582	0.892563
AT5G50020.2	0	0	0	NA	0	0	0	NA
AT1G72370.2	0.969	0.318558	0.314879	0.549311	1.399	0.408349	0.400431	0.542466
AT1G72370.1	0.961	0.316977	0.312395	0.548015	1.384	0.406163	0.396809	0.540842
AT1G18490.1	0.921	0.0332286	0.133679	0.945329	1.276	0.0252381	0.122873	0.960711
AT5G19550.1	0.692	0.0495152	0.139051	0.89329	0.704	0.0355556	0.118293	0.922371
AT4G23740.1	0.725	0.0625494	0.164534	0.876574	0.95	0.0818765	0.191538	0.853953
AT1G67750.1	0.601	0.0567358	0.175661	0.905585	0.403	0.0406981	0.118515	0.898208
AT3G23900.1	0.98	0.0913095	0.198437	0.833073	0.601	0.0931429	0.18964	0.818571
AT1G73940.1	1.331	0.230095	0.358926	0.737745	1.533	0.258929	0.43397	0.764976
AT5G47540.1	1.883	0.216178	0.371379	0.769456	1.694	0.203879	0.32431	0.734115
AT2G02370.2	1.058	0.0433252	0.171795	0.943385	1.036	0.0327967	0.163733	0.963969
AT2G02370.1	1.332	0.0836364	0.246645	0.90242	1.029	0.072553	0.225188	0.910533
AT1G55530.1	1.574	0.211541	0.378913	0.785411	1.095	0.17042	0.280365	0.752861
AT2G43210.1	0.402	0.0118235	0.067921	0.970588	0.612	0.0520588	0.146467	0.893619
AT1G52720.1	1.069	0.152552	0.284371	0.797036	1.101	0.188776	0.323506	0.770892
AT3G09720.1	0.512	0.0284444	0.117279	0.944444	0.455	0.0189583	0.090921	0.958333
AT1G56000.1	NA	NA	NA	NA	NA	NA	NA	NA
AT5G22070.1	1.509	0.122669	0.300109	0.868413	1.284	0.115211	0.258893	0.847385
AT1G17080.1	1.297	0.264308	0.372656	0.698208	1.203	0.190256	0.304417	0.743645
AT1G74670.1	1.446	0.262579	0.352925	0.667021	1.162	0.345	0.336021	0.53609
AT3G59940.1	1.004	0.193278	0.305089	0.74043	0.955	0.152204	0.239344	0.739923
AT5G61412.1	1.092	0.340097	0.354711	0.563866	1.027	0.332419	0.30948	0.512961
AT5G58710.1	2.018	0.230389	0.441168	0.796205	1.154	0.200083	0.349627	0.77735
AT1G24490.2	1.751	0.291225	0.407178	0.691381	1.279	0.245517	0.327089	0.67344
AT5G08120.1	0.965	0.110015	0.231275	0.832884	1.142	0.102631	0.231015	0.849177
AT3G49670.1	1.323	0.109923	0.26952	0.869383	2.088	0.162146	0.40733	0.873654
AT3G54110.1	1.057	0.216581	0.289202	0.670755	1.149	0.169267	0.274235	0.74686
AT4G24760.1	0.877	0.0850431	0.206335	0.864824	0.674	0.110241	0.189679	0.763689
AT1G22360.1	1.325	0.351	0.439958	0.65179	1.603	0.479231	0.508284	0.578535
AT1G22360.2	1.341	0.352077	0.444863	0.655309	1.625	0.483564	0.51507	0.58026
AT4G37190.1	1.494	0.253111	0.410369	0.748483	1.03	0.127833	0.267478	0.828993
AT5G22050.2	1.17	0.214128	0.327789	0.731682	1.664	0.200426	0.37521	0.798846
AT5G22050.1	1.185	0.278359	0.35061	0.653945	1.292	0.235038	0.397317	0.767198
AT4G37190.2	1.089	0.202	0.315146	0.731338	0.798	0.123277	0.277242	0.842787
AT3G54130.1	1.9	0.200796	0.405093	0.816841	1.166	0.150898	0.323958	0.838932
AT5G49460.1	0.753	0.0502696	0.158087	0.911875	1.215	0.0776696	0.220267	0.895062
AT3G47965.1	1.794	0.369573	0.458429	0.64443	1.678	0.312903	0.408938	0.661791
AT3G13120.1	1.423	0.308474	0.354167	0.603791	1.544	0.33314	0.394102	0.621778
AT2G26190.1	0.729	0.101043	0.195586	0.80392	0.793	0.1146	0.226594	0.807373
AT4G32330.3	1.374	0.216108	0.393069	0.790071	1.577	0.204351	0.380671	0.760932
AT1G74920.2	1.401	0.249021	0.376818	0.724282	1.125	0.255579	0.332748	0.664703
AT4G32330.1	1.374	0.291034	0.357569	0.639443	1.562	0.236449	0.358494	0.721731
AT4G24275.1	1.488	0.28061	0.391295	0.689054	1.469	0.314537	0.37818	0.622121
AT1G75800.1	1.288	0.228429	0.337703	0.712723	1.111	0.264222	0.329579	0.64845
AT4G14230.1	0.948	0.219388	0.303621	0.690688	1.138	0.232896	0.322135	0.685008
AT3G26115.1	0	0	0	NA	0	0	0	NA
AT2G03680.1	1.65	0.347659	0.367673	0.557855	1.276	0.300756	0.348736	0.609078
AT1G44780.1	0.691	0.12805	0.19582	0.714467	0.362	0.0713	0.142664	0.802314
AT2G20020.1	1.317	0.281561	0.378902	0.680544	1.338	0.181805	0.341476	0.799675
AT5G15700.2	0.953	0.035451	0.148857	0.94989	0.473	0.037098	0.127166	0.921569
AT1G33060.2	NA	NA	NA	NA	NA	NA	NA	NA
AT2G18050.1	0.705	0.179452	0.215944	0.626292	0.551	0.143903	0.167676	0.610032
AT2G18050.2	1.19	0.304723	0.400582	0.672255	0.893	0.233702	0.268492	0.61508
AT1G75750.1	1.245	0.267714	0.342894	0.649766	1.279	0.272469	0.339968	0.645064
AT1G75750.2	1.249	0.163741	0.303274	0.794694	1.256	0.162877	0.290755	0.781308
AT3G22150.1	1.081	0.0695	0.20723	0.906207	0.926	0.0644091	0.191949	0.908113
AT2G01590.1	0.929	0.0899615	0.224233	0.871395	0.825	0.127	0.243911	0.807343
AT5G21990.1	1.2	0.201781	0.307392	0.718354	1	0.136377	0.254423	0.797723
AT1G66660.2	1.483	0.3159	0.488747	0.734457	1.376	0.30655	0.417733	0.657943
AT1G14740.1	1.243	0.261294	0.306015	0.587447	0.825	0.0958235	0.201128	0.825281
AT5G42150.1	1.176	0.21353	0.31673	0.715368	1.26	0.213015	0.291494	0.670968
AT2G34200.1	2.039	0.409616	0.431214	0.560662	1.25	0.347178	0.338729	0.533938
AT2G33120.2	1.248	0.253918	0.356298	0.696503	1.331	0.187827	0.293265	0.73198
AT2G33120.3	1.66	0.371597	0.442267	0.628688	1.723	0.29971	0.412885	0.685712
AT2G33120.1	1.233	0.256092	0.353558	0.690415	1.316	0.190847	0.292336	0.724816
AT3G53270.3	1.175	0.115378	0.260527	0.844754	1.381	0.111155	0.234494	0.81743
AT1G54210.1	1.147	0.3073	0.358102	0.597787	0.794	0.16995	0.256689	0.711253
AT1G54210.2	1.12	0.1838	0.312644	0.759001	0.746	0.0876667	0.201107	0.847275
AT5G41970.1	NA	NA	NA	NA	NA	NA	NA	NA
AT4G22240.1	1.227	0.154386	0.300785	0.807619	1.036	0.121136	0.242257	0.818028
AT4G17560.1	1.008	0.152138	0.255512	0.759449	1.093	0.15169	0.295949	0.811783
AT1G18150.2	0.439	0.0283226	0.107849	0.935484	0.501	0.0161613	0.088519	0.967742
AT5G59000.1	1.235	0.0421345	0.163605	0.940173	0.863	0.0232437	0.114949	0.963359
AT3G22970.2	1.561	0.204841	0.330209	0.742161	1.676	0.199902	0.325223	0.743095
AT5G58510.1	0.498	0.031619	0.121435	0.936508	0.77	0.0739365	0.184222	0.864885
AT1G06850.2	1.828	0.188474	0.396696	0.831255	1.803	0.208021	0.401532	0.799456
AT2G03550.1	1.085	0.324269	0.398062	0.639166	1.301	0.245654	0.325019	0.65428
AT4G22250.1	1.209	0.18813	0.325567	0.773478	1.272	0.221611	0.355012	0.74865
AT5G65960.1	0.793	0.126889	0.232557	0.789475	0.469	0.0631852	0.140732	0.847293
AT2G35840.3	0.734	0.0611667	0.155945	0.869792	0.675	0.0606875	0.166605	0.894017
AT2G35840.2	0.679	0.0565208	0.144137	0.869832	0.612	0.055	0.15091	0.893939
AT2G35840.1	0.67	0.0957143	0.183279	0.793651	0.605	0.173952	0.216324	0.644689
AT2G33810.1	0.733	0.0246048	0.102506	0.950748	1.277	0.0458862	0.160757	0.924247
AT5G36290.1	1.454	0.165533	0.335727	0.82114	1.623	0.23332	0.403671	0.77283
AT5G36290.2	1.414	0.243369	0.379246	0.737882	1.898	0.268315	0.454961	0.766826
AT4G30260.1	1.083	0.222025	0.334091	0.722942	1.151	0.219101	0.299153	0.677959
AT4G16180.2	0.758	0.047566	0.153414	0.919207	0.584	0.026434	0.10474	0.944851
AT4G16180.1	0.953	0.0603077	0.194582	0.918968	0.751	0.0360962	0.137091	0.940689
AT4G38740.1	1.369	0.332743	0.362006	0.586411	1.224	0.3196	0.37099	0.617316
AT3G20410.1	1.011	0.147356	0.277907	0.802304	1.014	0.165089	0.281803	0.765677
AT2G36000.1	1.006	0.161333	0.253457	0.739357	1.829	0.292351	0.472614	0.749781
AT5G37510.1	1.358	0.262891	0.360377	0.686448	1.045	0.192055	0.296106	0.735263
AT5G37510.2	1.348	0.260891	0.357839	0.686687	1.039	0.1914	0.29458	0.734603
AT1G51110.1	1.063	0.113152	0.276476	0.871241	0.697	0.0526667	0.156418	0.906824
AT5G65940.2	1.403	0.438658	0.434968	0.548773	1.204	0.293632	0.360971	0.641659
AT5G65940.3	1.363	0.423658	0.422871	0.551733	1.172	0.282737	0.351167	0.646167
AT1G17680.1	1.326	0.232147	0.346676	0.719796	1.377	0.232469	0.368855	0.74398
AT5G59410.1	1.067	0.163822	0.26401	0.739962	1.643	0.193986	0.360488	0.79228
AT3G20780.1	0.737	0.157926	0.251683	0.732055	0.403	0.0298519	0.105542	0.925926
AT1G21160.1	0.549	0.0482993	0.137578	0.897191	0.513	0.0458571	0.121386	0.879831
AT5G55960.1	0.675	0.0351196	0.124717	0.928939	0.427	0.0232065	0.0968021	0.945652
AT5G22875.1	1.054	0.159186	0.32021	0.820384	1.778	0.193695	0.410079	0.833217
AT1G05150.1	0.886	0.0499298	0.155662	0.910971	0.712	0.0729912	0.178842	0.865592
AT5G04440.1	1.107	0.229909	0.344522	0.724759	1.318	0.237964	0.340549	0.69883
AT3G47060.1	NA	NA	NA	NA	NA	NA	NA	NA
AT1G65440.1	0.934	0.2118	0.249495	0.617107	1.279	0.24045	0.282661	0.610428
AT3G63500.1	1.231	0.196455	0.304874	0.734013	1.408	0.21482	0.327725	0.726057
AT5G04420.2	0.429	0.00809434	0.0583691	0.981132	0.398	0.0150189	0.0758416	0.962264
AT5G04420.3	0.703	0.0213	0.105511	0.963047	0.65	0.0351765	0.118754	0.920716
AT5G04420.1	0.688	0.0465556	0.140199	0.902826	0.808	0.0261852	0.113647	0.951058
AT3G63500.2	1.217	0.205828	0.30916	0.717379	1.084	0.244897	0.349598	0.704649
AT3G46000.1	1.686	0.152533	0.277191	0.769069	1.401	0.205111	0.325574	0.743554
AT1G19310.1	1.173	0.172464	0.316645	0.79189	0.99	0.155917	0.271069	0.769681
AT4G31990.3	0.944	0.120917	0.244682	0.823619	0.93	0.121569	0.214611	0.775126
AT4G31990.2	0.91	0.115072	0.234691	0.825947	0.894	0.114856	0.205048	0.778975
AT4G31990.1	0.755	0.0413774	0.134726	0.921582	0.895	0.052566	0.155864	0.903974
AT4G32400.1	0.781	0.152114	0.236855	0.730868	1.038	0.148943	0.25344	0.750728
AT3G13460.1	1.322	0.151468	0.275799	0.779532	1.336	0.088127	0.208366	0.85276
AT3G17120.1	1.885	0.150331	0.332416	0.841777	0.968	0.125471	0.243784	0.811263
AT4G01040.1	NA	NA	NA	NA	NA	NA	NA	NA
AT4G24830.1	0.588	0.0514375	0.144354	0.895568	0.822	0.0824875	0.195475	0.861776
AT3G13460.2	0.616	0.0645091	0.148898	0.852957	0.671	0.0507182	0.134742	0.882594
AT5G42390.1	0.501	0.115241	0.187889	0.747807	0.65	0.0784483	0.184148	0.857143
AT1G60260.1	NA	NA	NA	NA	NA	NA	NA	NA
AT1G59840.2	0.66	0.0548182	0.15408	0.896125	0.878	0.0500303	0.173429	0.92906
AT4G04470.1	0.595	0.0731282	0.166163	0.850847	0.865	0.0412564	0.156779	0.93879
AT3G07790.1	0.745	0.177111	0.241074	0.672545	0.967	0.133381	0.221111	0.745935
AT1G59840.1	0.596	0.0694286	0.175073	0.87331	0.883	0.0946429	0.246352	0.880916
AT5G46680.1	0.511	0.0354861	0.1299	0.930556	0.833	0.0554028	0.164436	0.9033
AT1G17455.2	2.193	0.119214	0.319411	0.882332	2.678	0.143556	0.44218	0.908169
AT1G17455.1	2.034	0.223385	0.396547	0.775907	2.619	0.254054	0.521873	0.819159
AT3G18960.1	1.096	0.116452	0.25833	0.84635	0.929	0.0551129	0.169247	0.908546
AT3G48200.1	1.082	0.145074	0.267001	0.789537	0.6	0.0835147	0.168038	0.816602
AT1G11260.1	1.344	0.526747	0.365255	0.397014	2.212	0.618013	0.606332	0.53946
AT1G64750.2	0.78	0.162209	0.235358	0.7067	0.919	0.107081	0.195299	0.787873
AT1G64750.3	1.89	0.27328	0.42864	0.728814	1.155	0.23764	0.318271	0.676546
AT3G25530.1	1.332	0.353625	0.404902	0.612915	1.294	0.307357	0.393294	0.661611
AT1G64750.1	1.664	0.322257	0.402443	0.629458	1.066	0.257857	0.30751	0.629831
AT3G01480.1	1.127	0.222228	0.300357	0.683441	1.531	0.266851	0.364835	0.678474
AT2G42190.1	1.295	0.291141	0.317972	0.588355	1.348	0.296467	0.357128	0.631297
AT3G01480.2	1.157	0.229347	0.308949	0.682127	1.564	0.273406	0.373077	0.677717
AT3G09440.1	1.231	0.151654	0.269792	0.775396	0.851	0.216596	0.26434	0.640858
AT5G49660.1	0.827	0.103968	0.238197	0.849457	1.301	0.130232	0.286882	0.841413
AT3G09440.2	1.223	0.147906	0.266487	0.77972	0.846	0.211264	0.261958	0.64765
AT5G16680.1	1.523	0.416112	0.437585	0.574551	1.684	0.388328	0.418328	0.583404
AT2G34300.2	1.168	0.153545	0.293298	0.802591	0.536	0.0847879	0.154817	0.781879
AT2G34300.1	1.178	0.12787	0.235476	0.779554	0.613	0.119326	0.180633	0.717696
AT5G32450.1	0.907	0.12406	0.224971	0.786068	1.291	0.20412	0.338637	0.752616
AT1G69840.7	1.261	0.115735	0.259659	0.847599	1.32	0.142806	0.311889	0.84215
AT3G25150.1	1.04	0.117778	0.233165	0.812837	0.744	0.0899722	0.183313	0.81736
AT1G21580.1	0.871	0.185589	0.271403	0.702935	0.78	0.115137	0.2278	0.80722
AT3G02790.1	1.302	0.440513	0.449248	0.562109	1.456	0.325385	0.408014	0.643551
AT1G69840.6	1.213	0.186862	0.34391	0.793695	1.28	0.174517	0.394444	0.849253
AT1G48650.1	1.11	0.185625	0.297114	0.745253	0.998	0.184966	0.287384	0.736908
AT1G48650.2	1.142	0.189182	0.305923	0.748926	1.032	0.189102	0.296466	0.740193
AT5G49510.1	1.548	0.312725	0.415107	0.673648	1.812	0.388913	0.477387	0.639919
AT2G22450.1	1.035	0.125	0.214734	0.762038	0.964	0.153048	0.26107	0.76709
AT5G49510.2	1.587	0.318681	0.425009	0.675475	1.879	0.40771	0.49629	0.636492
AT5G51750.1	0.4	0.0984	0.169085	0.753211	1.005	0.0693714	0.201383	0.898611
AT5G17520.1	1.326	0.189868	0.333455	0.777703	0.86	0.114735	0.216546	0.797993
AT2G18960.1	1.29	0.110634	0.259693	0.858625	0.942	0.0850792	0.183706	0.838002
AT1G16260.2	0.613	0.079	0.181489	0.855581	0.655	0.0817273	0.20772	0.87208
AT5G02500.1	1.081	0.318074	0.308397	0.537906	1.268	0.232204	0.301619	0.660784
AT1G56460.2	1.167	0.186667	0.292269	0.735533	1.807	0.201709	0.319042	0.730682
AT1G01770.1	1.475	0.182848	0.332916	0.781265	1.067	0.162975	0.315611	0.806571
AT5G25100.1	0.75	0.0937612	0.201468	0.834937	0.826	0.0534179	0.157623	0.903371
AT5G25100.2	0.763	0.0867473	0.201556	0.856764	0.724	0.0426813	0.136828	0.916909
AT3G19360.1	0.489	0.0431471	0.138698	0.911765	0.56	0.0329412	0.131765	0.941176
AT2G36060.1	1.333	0.200544	0.342192	0.771246	1.624	0.242524	0.413342	0.766522
AT2G36060.2	1.347	0.20768	0.349051	0.76597	1.634	0.245379	0.416966	0.765461
AT2G36060.3	1.404	0.226184	0.370413	0.756786	1.677	0.250981	0.427212	0.766054
AT1G72170.1	1.429	0.200372	0.328906	0.747916	1.038	0.221628	0.331984	0.718436
AT3G24530.1	1.436	0.172284	0.299194	0.763748	0.944	0.155821	0.243434	0.728901
AT1G07930.1	1.408	0.328371	0.397434	0.6364	1.412	0.231258	0.36114	0.73868
AT1G47250.1	1.104	0.491821	0.35879	0.414984	0.945	0.437	0.326814	0.423814
AT1G07930.2	1.437	0.333	0.406055	0.639651	1.433	0.234032	0.366251	0.739452
AT4G09030.1	1.398	0.260929	0.406822	0.73163	1.082	0.271357	0.336206	0.645471
AT3G19420.1	1.457	0.162817	0.313387	0.806018	0.914	0.0795652	0.196864	0.87069
AT3G51370.2	1.794	0.182053	0.31328	0.766562	1.438	0.203813	0.314015	0.729823
AT3G51370.1	1.174	0.12487	0.239979	0.796746	1.37	0.166021	0.267545	0.741129
AT4G08850.2	0	0	0	NA	0	0	0	NA
AT4G08850.1	0	0	0	NA	0	0	0	NA
AT4G32010.1	1.079	0.0954379	0.217537	0.846793	1.009	0.0855196	0.199913	0.852341
AT1G21630.2	0.631	0.0630118	0.154007	0.860616	1.242	0.0704497	0.184472	0.876309
AT1G73030.1	0.884	0.165721	0.242462	0.71441	0.91	0.201623	0.259517	0.661315
AT1G21630.1	0.621	0.0729549	0.162738	0.837715	1.219	0.0708195	0.185938	0.875765
AT4G19060.1	0.531	0.0726	0.148404	0.813223	0.48	0.0930857	0.163775	0.770797
AT3G25840.2	1.803	0.320196	0.364882	0.601438	1.549	0.323679	0.358903	0.593575
AT3G25840.1	0.877	0.173797	0.251253	0.705725	1.264	0.214254	0.292614	0.671772
AT1G27030.1	1.205	0.183586	0.335487	0.788803	1.114	0.179931	0.303624	0.761528
AT2G20950.3	1.157	0.465024	0.382487	0.467321	1.28	0.365439	0.437214	0.633082
AT2G20950.2	1.148	0.450929	0.380347	0.478243	1.269	0.354429	0.431986	0.641069
AT2G20950.1	1.099	0.430571	0.366084	0.481594	1.217	0.334024	0.41187	0.646058
AT3G06450.2	1.287	0.232115	0.336975	0.704238	1.015	0.166327	0.304901	0.794558
AT3G25150.2	0	0	0	NA	0	0	0	NA
AT3G02950.1	1.176	0.353364	0.389271	0.596852	1.17	0.297061	0.365335	0.644237
AT2G21060.1	0.831	0.224957	0.282823	0.653283	0.963	0.215478	0.327735	0.728866
AT5G46920.1	1.002	0.149955	0.293315	0.808413	0.997	0.126591	0.283128	0.847315
AT1G33700.1	1.177	0.05885	0.256521	0.95	1	0.065775	0.235855	0.932013
AT1G33700.2	1.177	0.0720233	0.268486	0.93675	0.998	0.0757209	0.243007	0.91749
AT3G55500.1	1.19	0.163958	0.294998	0.781581	1.165	0.124438	0.24019	0.786403
AT1G76160.1	1.051	0.299656	0.323889	0.586855	1.268	0.281082	0.361578	0.660293
AT4G19520.1	NA	NA	NA	NA	NA	NA	NA	NA
AT4G21190.1	0.743	0.15626	0.233149	0.718462	0.851	0.18666	0.263792	0.698787
AT5G62900.1	1.232	0.389214	0.35199	0.50455	1.577	0.357571	0.426893	0.626775
AT1G58030.1	1.284	0.246854	0.350741	0.699913	1.569	0.259911	0.375103	0.704187
AT2G28450.2	1.556	0.147922	0.31477	0.833271	1.313	0.122663	0.311501	0.87976
AT4G19990.2	1.545	0.2659	0.417201	0.737553	1.398	0.246857	0.38349	0.732632
AT3G27100.1	1.161	0.4043	0.374154	0.515889	1.389	0.26972	0.391238	0.705137
AT3G27100.2	1.226	0.426137	0.396667	0.517969	1.465	0.280039	0.41102	0.709792
AT1G51450.1	0.668	0.12775	0.213541	0.755382	1.336	0.413625	0.430185	0.563917
AT1G29470.1	1.216	0.183411	0.299088	0.747241	1.069	0.134934	0.239935	0.778957
AT1G29470.2	1.202	0.14927	0.335647	0.850908	0.593	0.0751892	0.162221	0.836633
AT1G19880.1	0.819	0.0917835	0.17991	0.808452	0.867	0.0726186	0.180541	0.871579
AT1G64500.1	0.889	0.111167	0.264583	0.861069	0.779	0.118125	0.197781	0.750485
AT2G01060.1	1.689	0.357287	0.431175	0.627851	1.66	0.364685	0.408207	0.592454
AT4G29870.1	NA	NA	NA	NA	NA	NA	NA	NA
AT1G53520.1	1.231	0.239278	0.343942	0.690414	0.526	0.0643333	0.149507	0.854922
AT5G01390.4	1.979	0.354211	0.491909	0.689845	1.94	0.477754	0.579958	0.637932
AT5G01390.3	2.011	0.384386	0.507768	0.66983	1.849	0.466526	0.556885	0.63089
AT5G59180.1	1.526	0.3772	0.454029	0.63252	1.8	0.4673	0.485166	0.564776
AT1G58684.1	NA	NA	NA	NA	NA	NA	NA	NA
AT5G03905.1	1.639	0.269764	0.36001	0.669515	1.57	0.357146	0.442886	0.644015
AT5G15610.2	1.113	0.164704	0.296702	0.784999	0.986	0.230407	0.322405	0.695482
AT5G15610.1	1.171	0.17437	0.311801	0.782451	1.033	0.241148	0.337828	0.695996
AT1G80950.1	1.005	0.0756765	0.188049	0.863552	0.769	0.104912	0.188982	0.780905
AT4G33565.1	0	0	0	NA	0.409	0.0146071	0.0759009	0.964286
AT2G22970.1	0.867	0.137308	0.269393	0.81198	1.175	0.207231	0.395635	0.802753
AT1G65320.1	0.955	0.115325	0.240754	0.824835	1.108	0.0968875	0.22669	0.855678
AT1G13170.1	0.462	0.0101168	0.0676137	0.978102	0.571	0.0278175	0.100598	0.930644
AT1G13170.2	0.477	0.010295	0.069316	0.978417	0.591	0.0284029	0.103511	0.931633
AT3G51430.1	1.485	0.305542	0.433872	0.699486	0.887	0.147708	0.244964	0.758139
AT1G14010.1	0.884	0.156667	0.259794	0.758056	0.776	0.193545	0.259031	0.679325
AT5G42780.1	0.624	0.0381622	0.13213	0.927724	0.838	0.106054	0.222523	0.830441
AT1G28580.2	1.66	0.110491	0.257234	0.854515	1.441	0.0814757	0.216578	0.88261
AT1G28580.1	0.406	0.0495122	0.132855	0.878049	0.413	0.0264146	0.0960919	0.933856
AT1G31800.1	NA	NA	NA	NA	NA	NA	NA	NA
AT5G16110.1	0.357	0.00360606	0.0356982	0.989899	0	0	0	NA
AT5G55990.1	1.317	0.246569	0.314053	0.652782	1.243	0.223696	0.31822	0.695828
AT3G52220.1	1.529	0.208896	0.314882	0.707338	1.137	0.242229	0.314953	0.664766
AT5G45100.2	1.121	0.0894242	0.217541	0.862841	1.45	0.0931455	0.24122	0.878539
AT4G13200.1	0.475	0.0629167	0.13022	0.826269	0.327	0.0545	0.121866	0.833333
AT3G56120.1	0.716	0.0548696	0.160934	0.9004	0.492	0.0427826	0.138631	0.913043
AT5G44020.1	0.979	0.253048	0.313606	0.645554	1.415	0.389667	0.456682	0.617238
AT3G10350.2	1.033	0.332926	0.356297	0.579713	0.966	0.318704	0.39135	0.637269
AT1G06360.1	1.434	0.345594	0.390863	0.596265	1.228	0.333062	0.379471	0.60722
AT3G53560.1	1.235	0.127125	0.285802	0.841077	0.622	0.0825833	0.157368	0.802136
AT1G21650.2	0.679	0.0972069	0.195019	0.808455	0.595	0.0722414	0.162436	0.842071
AT1G21650.3	0.718	0.0766667	0.186059	0.861181	0.395	0.0119697	0.0677108	0.969697
AT1G52980.1	0.724	0.161871	0.233807	0.709626	1.002	0.192323	0.29729	0.735681
AT1G30330.1	1.5	0.246123	0.372602	0.725268	1.364	0.229512	0.366204	0.745807
AT5G44000.1	1.442	0.163833	0.353058	0.817019	1.322	0.2715	0.436438	0.7483
AT1G30330.2	1.5	0.231874	0.368906	0.743787	1.362	0.210042	0.359685	0.770854
AT3G10330.1	0.939	0.190234	0.29533	0.732452	1.218	0.212208	0.331428	0.737168
AT4G08500.1	1.171	0.12567	0.237439	0.791869	1.323	0.11184	0.25302	0.842629
AT4G03260.2	1.44	0.205072	0.358297	0.776604	1.209	0.175	0.317501	0.790968
AT5G67320.1	1.372	0.212	0.357722	0.758246	1.076	0.144487	0.272954	0.793475
AT4G31180.1	1.316	0.191991	0.284662	0.707015	0.946	0.182455	0.277412	0.729036
AT4G31180.2	1.319	0.150122	0.268311	0.772286	0.866	0.11051	0.223901	0.821021
AT4G03200.2	1.281	0.100147	0.23772	0.861884	1.215	0.0905333	0.223844	0.869233
AT4G03200.1	0.86	0.0886923	0.192178	0.83479	0.783	0.0330769	0.132741	0.945945
AT1G08880.1	1.36	0.275903	0.32574	0.615491	1.208	0.262361	0.329182	0.643617
AT1G09580.1	0.905	0.157659	0.270178	0.764435	0.638	0.0847727	0.190465	0.848148
AT5G44240.2	0.837	0.097813	0.2329	0.859856	1.057	0.0853902	0.203559	0.855553
AT3G15160.1	0.507	0.01521	0.0864877	0.97	0.599	0.01198	0.08386	0.98
AT1G74260.1	0.736	0.148534	0.235188	0.738233	0.809	0.104	0.204934	0.805809
AT3G22590.1	1.628	0.384886	0.437159	0.607063	1.504	0.377977	0.505995	0.679313
AT1G52500.1	1.334	0.468184	0.47801	0.559631	1.112	0.239684	0.323538	0.677889
AT3G25717.1	1.164	0.374094	0.372694	0.551208	1.285	0.336302	0.358276	0.567494
AT2G46030.1	1.292	0.310596	0.376874	0.634424	2.101	0.451426	0.545285	0.626354
AT3G57080.1	1.109	0.269385	0.411814	0.723455	1.379	0.460538	0.524087	0.598373
AT2G47110.1	0.915	0.211184	0.276935	0.668644	0.885	0.2475	0.321156	0.665131
AT2G47110.2	0.953	0.220105	0.288565	0.668542	0.929	0.2635	0.33914	0.661763
AT3G25190.1	0.975	0.350719	0.363908	0.55553	1.68	0.412062	0.429617	0.554385
AT5G27150.1	1.342	0.150341	0.287628	0.798125	1.443	0.1336	0.236419	0.7698
AT2G45010.1	1.637	0.324585	0.46176	0.702379	1.396	0.273954	0.438705	0.747817
AT1G01790.1	1.174	0.314286	0.341837	0.584878	1.704	0.346543	0.496805	0.700413
AT5G57120.1	1.202	0.447032	0.383792	0.487006	1.514	0.417581	0.448661	0.585401
AT5G20520.1	1.197	0.253217	0.321759	0.649961	1.957	0.201116	0.367091	0.771254
AT1G11910.1	0.985	0.167017	0.258431	0.729684	1.006	0.157797	0.250626	0.740287
AT4G12310.1	1.023	0.256759	0.35167	0.685246	1.061	0.243621	0.343972	0.699963
AT1G27970.2	1.198	0.298681	0.369202	0.64623	1.237	0.320514	0.336596	0.567841
AT5G09230.5	0.86	0.138429	0.24806	0.770202	0.901	0.136667	0.237652	0.762203
AT4G30020.1	1.223	0.12557	0.261897	0.823564	1.165	0.0915436	0.232407	0.87598
AT5G20500.1	1.311	0.257774	0.36745	0.695557	0.671	0.14029	0.205702	0.715151
AT1G01780.1	1.298	0.0652	0.219813	0.924414	1.23	0.09108	0.209067	0.843652
AT5G62050.1	1.669	0.213448	0.373265	0.759559	1.296	0.196239	0.333046	0.764307
AT3G60130.1	1.029	0.133207	0.289989	0.843315	0.899	0.0961724	0.22034	0.853705
AT2G40750.1	0.645	0.0788485	0.173011	0.837037	0.574	0.0277273	0.119934	0.950969
AT3G60130.3	1.61	0.264	0.404613	0.730529	1.436	0.19721	0.332016	0.75974
AT1G09830.1	0.436	0.0809245	0.163779	0.811703	1.164	0.130226	0.27942	0.833447
AT3G12120.2	1.444	0.0505556	0.232318	0.957076	1.284	0.0409841	0.190078	0.958492
AT3G12550.1	0.67	0.0195613	0.100136	0.965495	0.663	0.0409161	0.132381	0.915659
AT3G19640.1	1.228	0.276308	0.40177	0.710703	1.148	0.235269	0.412871	0.77477
AT3G06480.1	0.953	0.127632	0.260056	0.819664	0.946	0.0746842	0.203772	0.885965
AT1G32460.1	1.456	0.244845	0.381531	0.738242	1.675	0.212806	0.397283	0.798277
AT2G23070.1	1.051	0.196529	0.286926	0.693452	0.489	0.173941	0.224183	0.640355
AT5G06265.3	1.429	0.128488	0.281725	0.841096	1.246	0.111474	0.243164	0.838217
AT5G02800.1	1.746	0.353565	0.430149	0.632791	1.43	0.308806	0.431915	0.696116
AT2G16930.1	0.869	0.0548649	0.170933	0.914339	0.68	0.0590811	0.147343	0.868494
AT2G16930.2	0.864	0.233414	0.272393	0.616067	0.687	0.154414	0.216121	0.688061
AT2G16930.3	0.53	0.0176531	0.0878142	0.963784	0.544	0.032102	0.110508	0.926191
AT5G24314.2	0.545	0.02676	0.108535	0.945172	0.271	0.01084	0.0531049	0.96
AT4G16141.1	1.022	0.204573	0.26129	0.650877	1.106	0.185247	0.289528	0.739663
AT5G19930.2	1.097	0.121516	0.281885	0.854392	1.177	0.103281	0.268299	0.877042
AT5G42770.1	0.685	0.0683699	0.162541	0.854492	0.497	0.0621918	0.14295	0.8515
AT5G42770.2	0.716	0.0677922	0.166246	0.862084	0.525	0.0624286	0.147814	0.858856
AT5G19930.1	1.106	0.195875	0.338645	0.767068	1.181	0.141275	0.313312	0.836573
AT2G16950.2	1.068	0.197814	0.324979	0.752219	1.245	0.236302	0.348083	0.709667
AT2G16950.1	1.098	0.203419	0.334183	0.752215	1.275	0.242791	0.356655	0.708772
AT5G10060.1	0.934	0.109642	0.209973	0.795145	0.85	0.0873396	0.193868	0.841628
AT3G29160.1	0.881	0.148178	0.262324	0.776814	1.162	0.159209	0.299668	0.79743
AT3G29160.2	0.997	0.185258	0.287549	0.73114	0.991	0.154136	0.275401	0.780243
AT3G29160.3	0.857	0.262176	0.315083	0.628219	1.13	0.268088	0.376968	0.696418
AT1G69935.1	0.947	0.12016	0.245394	0.823648	0.898	0.0802	0.217017	0.890374
AT5G61770.3	1.381	0.220069	0.375291	0.752656	1.384	0.245276	0.39848	0.751688
AT5G61770.2	1.847	0.40638	0.47994	0.617711	1.378	0.27066	0.38139	0.696651
AT5G61770.1	1.893	0.41428	0.492732	0.620867	1.4	0.2753	0.387568	0.696283
AT2G48121.1	0	0	0	NA	0	0	0	NA
AT1G11680.1	1.215	0.172259	0.311168	0.782688	1.111	0.0992963	0.251373	0.878205
AT3G01610.1	1.336	0.246694	0.347882	0.69208	1.123	0.182016	0.330829	0.790062
AT2G48121.2	1.31	0.216035	0.340815	0.740553	1.795	0.32864	0.473516	0.707612
AT3G62650.1	0.79	0.172308	0.240633	0.694265	1.424	0.259192	0.384089	0.709139
AT5G64380.1	0.954	0.104692	0.241142	0.854311	1.529	0.18941	0.378432	0.807857
AT3G45900.1	0.972	0.07716	0.20413	0.883318	1.418	0.09192	0.27113	0.90389
AT2G33630.1	0.909	0.1786	0.269253	0.718664	0.915	0.1339	0.254228	0.80112
AT4G11100.2	1.538	0.0646383	0.20339	0.902354	1.369	0.050234	0.185333	0.93366
AT4G11100.1	1.51	0.2252	0.306784	0.660526	1.335	0.17944	0.295002	0.735185
AT5G05730.1	1.084	0.151846	0.262152	0.764131	1.099	0.179962	0.281829	0.73439
AT2G37400.1	0.745	0.1245	0.235435	0.798635	0.337	0.1011	0.154433	0.7
AT5G05730.2	1.099	0.139807	0.257303	0.785896	1.116	0.166105	0.277894	0.75864
AT1G74920.1	1.295	0.216274	0.330137	0.72848	1.176	0.241568	0.32082	0.673991
AT1G29880.1	0.859	0.139615	0.272421	0.81068	0.79	0.121538	0.239249	0.807692
AT5G08560.2	0.644	0.0588333	0.151729	0.875604	0.649	0.0288039	0.118412	0.947557
AT1G54610.1	1.292	0.265667	0.344717	0.661046	1.139	0.279598	0.334371	0.631896
AT1G54610.2	1.18	0.122183	0.270868	0.845784	1.153	0.107892	0.268593	0.875932
AT1G54610.3	1.174	0.121656	0.269531	0.845638	1.151	0.10772	0.268293	0.876032
AT5G23630.1	1.358	0.155406	0.315204	0.819095	1.13	0.179855	0.321226	0.784424
AT5G55580.1	0.786	0.0430986	0.16106	0.937586	0.865	0.0538592	0.171378	0.915463
AT1G25560.1	0.903	0.1729	0.258702	0.720973	1.296	0.332375	0.399208	0.631066
AT1G65840.1	1.208	0.148596	0.28046	0.797142	1.501	0.138419	0.31294	0.847687
AT1G19740.1	1.103	0.219956	0.282708	0.652253	1.275	0.229578	0.328912	0.699603
AT2G38000.1	0.814	0.117362	0.227618	0.808379	0.933	0.146052	0.243348	0.749964
AT1G20816.1	0.847	0.16925	0.254854	0.709708	1.011	0.117708	0.276982	0.859867
AT5G43760.1	1.353	0.327554	0.345887	0.573377	1.83	0.392169	0.395776	0.544307
AT4G28740.1	1.318	0.0473444	0.179139	0.933237	0.721	0.0400889	0.140063	0.93074
AT5G23405.2	1.421	0.164983	0.291579	0.767155	1.335	0.191034	0.356362	0.797622
AT3G16140.1	1.216	0.254978	0.323409	0.654105	1.272	0.339956	0.410995	0.637483
AT1G51610.1	0.93	0.0705707	0.177897	0.873265	1.249	0.0660488	0.202935	0.90936
AT1G08370.1	0.653	0.0526413	0.155077	0.902663	0.944	0.062337	0.176948	0.898508
AT2G22490.1	1.798	0.280941	0.407316	0.705542	1.157	0.248988	0.338377	0.683915
AT2G22490.2	1.821	0.283018	0.411801	0.707035	1.18	0.2527	0.344892	0.685686
AT1G24020.1	1.033	0.170054	0.303352	0.785167	1.266	0.228162	0.344589	0.723986
AT3G16720.1	1.059	0.111	0.249794	0.849556	1.563	0.174119	0.368655	0.830699
AT5G47435.1	1.419	0.321516	0.442185	0.689637	1.272	0.248484	0.387646	0.739059
AT1G07135.1	0.878	0.303481	0.292022	0.53235	0.853	0.244852	0.276766	0.605231
AT4G32070.1	0.989	0.268718	0.335969	0.650357	0.788	0.164923	0.225191	0.679854
AT1G66100.1	1.148	0.27307	0.355809	0.665395	2.286	0.397047	0.641756	0.749964
AT5G60640.1	0.958	0.250192	0.310386	0.646999	0.835	0.217385	0.307967	0.697139
AT5G60640.2	0.99	0.256731	0.32056	0.649686	0.86	0.223423	0.317013	0.697717
AT5G60640.3	0.969	0.255154	0.314122	0.643874	0.843	0.2225	0.31096	0.691929
AT1G25211.1	NA	NA	NA	NA	NA	NA	NA	NA
AT3G52420.1	1.054	0.210538	0.293604	0.684888	0.52	0.105192	0.16491	0.732569
AT3G53500.2	1.269	0.149053	0.283674	0.801772	1.738	0.23312	0.443073	0.802518
AT3G53500.1	1.991	0.259144	0.366995	0.691897	1.919	0.294995	0.435465	0.710618
AT5G60620.1	1.239	0.294558	0.390262	0.675366	1.188	0.301558	0.374884	0.64858
AT2G47850.1	0.942	0.10794	0.237036	0.840858	1.103	0.127836	0.262882	0.822152
AT1G45249.1	1.401	0.386127	0.385487	0.552025	1.016	0.31538	0.289239	0.512714
AT1G45249.2	1.42	0.409366	0.396649	0.538646	1.022	0.341803	0.291347	0.481233
AT1G45249.3	1.441	0.332794	0.386833	0.618999	1.016	0.262052	0.285322	0.589039
AT2G01100.1	1.205	0.260321	0.320411	0.634635	1.142	0.219526	0.308724	0.697246
AT2G01100.3	1.518	0.168105	0.281262	0.750659	1.077	0.14084	0.244636	0.774817
AT2G01100.2	1.413	0.323237	0.372904	0.608009	1.288	0.251546	0.32375	0.660873
AT5G27860.1	NA	NA	NA	NA	NA	NA	NA	NA
AT4G23885.1	1.335	0.298178	0.373922	0.644007	1.006	0.2442	0.313035	0.657886
AT5G27860.2	NA	NA	NA	NA	NA	NA	NA	NA
AT1G54310.1	0.401	0.0334167	0.110831	0.916667	0	0	0	NA
AT1G54770.1	1.188	0.197024	0.32815	0.760187	1.011	0.167905	0.272869	0.750804
AT3G21610.2	2.796	0.156328	0.401565	0.868094	2.055	0.174713	0.373423	0.833289
AT3G14350.2	0.66	0.0095618	0.0674732	0.982004	0.521	0.014309	0.0786341	0.970123
AT3G14350.1	1.676	0.14617	0.327141	0.849015	1.398	0.130745	0.305022	0.859585
AT3G21610.1	2.755	0.331778	0.579487	0.764802	2.045	0.397311	0.503719	0.647538
AT1G32160.1	0.492	0.0213913	0.100334	0.956522	1.018	0.147783	0.30045	0.81822
AT5G08760.1	NA	NA	NA	NA	NA	NA	NA	NA
AT5G39740.2	0.646	0.0384444	0.137366	0.933821	0.747	0.0580222	0.173484	0.908617
AT5G54860.1	1.032	0.152153	0.278585	0.789151	0.763	0.07975	0.188084	0.859737
AT2G21260.1	0.943	0.118143	0.295958	0.870502	0.558	0.0797143	0.195259	0.857143
AT3G07430.1	1.295	0.250941	0.340065	0.678677	1.271	0.267	0.334638	0.642886
AT4G24510.1	1.659	0.10356	0.272347	0.881615	1.354	0.117776	0.290123	0.872064
AT1G70090.1	1.09	0.159343	0.256822	0.74312	1.036	0.145731	0.243629	0.750894
AT1G70090.2	1.129	0.163015	0.264676	0.745531	1.11	0.156552	0.261305	0.750207
AT3G21630.1	0.949	0.157265	0.261394	0.752335	0.728	0.100824	0.215445	0.833997
AT1G70430.1	1.986	0.172464	0.384335	0.83318	1.468	0.178725	0.354514	0.807469
AT4G27040.1	1.535	0.232094	0.331908	0.693095	1.673	0.2376	0.343849	0.703309
AT3G21810.1	0.945	0.166509	0.243795	0.708599	0.926	0.160848	0.230288	0.689433
AT1G17650.1	0.327	0.0511852	0.115863	0.841936	0	0	0	NA
AT1G76405.2	1.161	0.143302	0.276617	0.807824	1.443	0.143163	0.34011	0.861765
AT4G32605.1	1.996	0.345921	0.507	0.705505	1.89	0.416974	0.504384	0.624386
AT2G41500.1	0.904	0.196395	0.279872	0.693475	0.807	0.111877	0.216454	0.793897
AT5G51640.1	0.52	0.0305882	0.122353	0.941176	0.451	0.00884314	0.0625304	0.980392
AT1G76670.1	1.47	0.307432	0.366526	0.625711	1.411	0.255477	0.336315	0.666458
AT3G21430.2	1.287	0.195462	0.329814	0.75916	1.229	0.148538	0.285053	0.799174
AT3G48820.1	0.461	0.0461	0.1383	0.9	0.677	0.0795	0.182395	0.84731
AT3G48820.2	0.46	0.0575	0.152131	0.875	0.428	0.0535	0.141548	0.875
AT1G71850.1	0.766	0.142811	0.233894	0.749931	0.904	0.118208	0.220959	0.7897
AT2G26900.1	1.041	0.226705	0.283942	0.643798	1.341	0.214614	0.346678	0.74871
AT2G46535.1	1.355	0.168911	0.269282	0.719177	1.059	0.201161	0.276109	0.682149
AT4G26670.1	1.116	0.109806	0.247536	0.850667	1.152	0.090597	0.20621	0.837798
AT1G36050.2	0.975	0.157886	0.237792	0.720184	1.023	0.152229	0.235952	0.73214
AT3G58500.1	1.385	0.29516	0.349802	0.621033	1.371	0.310255	0.366868	0.619634
AT5G54720.1	0.93	0.111789	0.203765	0.783708	0.914	0.121561	0.254775	0.827542
AT3G02870.1	0.876	0.0480118	0.149247	0.913173	0.946	0.107706	0.219285	0.820258
AT3G02870.3	0.438	0.0103059	0.066391	0.976471	0.653	0.0389882	0.12609	0.917413
AT3G02870.2	0.967	0.0531176	0.16493	0.913004	1.028	0.117165	0.238519	0.820234
AT5G47110.1	1.75	0.341231	0.402062	0.608637	1.403	0.366038	0.353759	0.531209
AT1G18250.1	1.331	0.236	0.416291	0.781653	1.662	0.22065	0.433536	0.806651
AT1G18250.2	1.288	0.059241	0.198206	0.919059	1.503	0.0675181	0.241563	0.932888
AT3G66652.1	1.481	0.0828378	0.273901	0.917102	0.453	0.0367297	0.123651	0.918919
AT3G66652.2	1.481	0.063425	0.254461	0.943782	0.451	0.033825	0.118789	0.925
AT2G03710.2	1.64	0.25827	0.387532	0.717692	1.86	0.274562	0.380648	0.688414
AT2G03710.3	1.743	0.273541	0.411602	0.718802	1.98	0.299076	0.407785	0.682017
AT4G21540.3	0.961	0.159121	0.302845	0.805018	0.755	0.0983939	0.199655	0.821794
AT5G20000.1	1.694	0.141489	0.339276	0.865279	1.269	0.11771	0.27455	0.858106
AT5G54310.1	0.888	0.11728	0.225932	0.807141	0.82	0.0520645	0.154966	0.907272
AT4G18060.1	1.157	0.149596	0.293719	0.810938	1.09	0.11167	0.271977	0.868699
AT5G20140.2	0.414	0.0347895	0.109417	0.910883	0.785	0.0712105	0.174016	0.86484
AT5G40970.1	1.495	0.342091	0.50685	0.716075	1.109	0.2635	0.382078	0.708995
AT5G59250.1	1.376	0.191632	0.367591	0.807861	1.401	0.226947	0.390771	0.77429
AT4G29480.1	1.007	0.164	0.274952	0.764843	1.148	0.198185	0.323797	0.75532
AT5G37830.1	1.529	0.245339	0.395664	0.750273	1.712	0.319548	0.420223	0.664187
AT3G49601.1	1.522	0.393617	0.396013	0.548517	1.531	0.360867	0.380651	0.566223
AT5G44800.1	1.055	0.075125	0.20893	0.894208	1.009	0.0740217	0.187839	0.873071
AT3G06190.1	1.453	0.272765	0.347968	0.654895	1.24	0.202929	0.307352	0.721615
AT4G00730.2	1.131	0.0945888	0.235692	0.873297	1.002	0.118497	0.246133	0.831009
AT4G00730.1	1.111	0.0929137	0.231429	0.873216	0.984	0.116198	0.241557	0.831238
AT4G38260.1	1.389	0.0520391	0.185212	0.926902	1.354	0.0537544	0.180527	0.921646
AT2G29580.1	0.858	0.264609	0.353662	0.667058	1.001	0.296217	0.352822	0.629589
AT3G16810.1	1.087	0.176204	0.293121	0.757807	1.158	0.191074	0.31731	0.756391
AT2G46220.1	0.964	0.176078	0.264825	0.722444	1.474	0.208733	0.311514	0.704863
AT5G14120.1	1.471	0.2112	0.3357	0.745563	2.391	0.261068	0.510786	0.805794
AT5G24630.5	0.698	0.0366824	0.130051	0.928884	0.761	0.0234412	0.108097	0.95725
AT5G24630.4	0.692	0.0363529	0.128889	0.92889	0.763	0.0235588	0.108539	0.957126
AT5G04480.2	1.576	0.258797	0.375268	0.69673	1.434	0.244189	0.378198	0.73181
AT5G24630.6	0.444	0.0408276	0.128299	0.908046	0.773	0.0177586	0.0967416	0.969311
AT5G24630.1	0.697	0.0366706	0.129991	0.928864	0.766	0.0236824	0.109065	0.957073
AT5G24630.3	0.436	0.040092	0.125987	0.908046	0.764	0.0175345	0.0955437	0.969332
AT5G52470.1	0.873	0.210345	0.282397	0.681546	0.86	0.181473	0.240959	0.672277
AT4G15560.1	0.983	0.108293	0.226322	0.832092	1.162	0.105866	0.232182	0.841009
AT4G00750.1	1.391	0.239741	0.369213	0.725486	1.059	0.213407	0.352612	0.757543
AT2G40660.1	1.363	0.361273	0.377055	0.569031	1.391	0.281523	0.417092	0.713121
AT3G52155.1	1.034	0.102069	0.263297	0.881803	1.33	0.138897	0.329529	0.851745
AT4G39350.1	0.907	0.156909	0.249296	0.735437	1.092	0.157045	0.267501	0.76531
AT3G52390.1	0.86	0.179273	0.306905	0.766919	0.646	0.0587273	0.185712	0.909091
AT1G76360.1	1.089	0.183889	0.296519	0.748386	1.5	0.228952	0.392764	0.769779
AT1G09160.2	0.951	0.141333	0.265866	0.795837	1.217	0.137392	0.292663	0.83454
AT5G66530.1	0.88	0.195984	0.272486	0.694828	0.934	0.146516	0.279592	0.805258
AT5G57350.2	1.039	0.33395	0.355294	0.575887	1.018	0.25495	0.364741	0.701324
AT3G58040.1	1.292	0.262645	0.338181	0.656652	0.963	0.157447	0.246525	0.731282
AT4G35750.1	1.434	0.171937	0.273166	0.735267	2.108	0.251375	0.397333	0.731288
AT2G45910.1	0.969	0.0762254	0.195718	0.87421	0.729	0.0360493	0.119844	0.920741
AT1G20110.1	1.628	0.282684	0.425898	0.713672	1.318	0.283368	0.397957	0.698625
AT3G53900.2	1.813	0.261	0.448766	0.759396	1.24	0.168727	0.350665	0.828541
AT3G53900.1	1.392	0.216958	0.403936	0.798424	2.052	0.224169	0.4582	0.824262
AT5G54300.1	0.789	0.120089	0.238443	0.810199	0.767	0.102375	0.198473	0.809552
AT1G09590.1	0.744	0.0854545	0.191971	0.850462	0.948	0.133818	0.276979	0.829642
AT2G39000.1	2.028	0.252889	0.540365	0.826255	0.873	0.237333	0.282532	0.61868
AT1G18030.2	1.79	0.512818	0.558821	0.588824	1.629	0.459182	0.520611	0.608572
AT4G30950.1	1.159	0.177741	0.292003	0.752019	1.338	0.154845	0.266805	0.762055
AT5G22770.2	1.161	0.181745	0.320811	0.780138	1.316	0.161647	0.302873	0.796815
AT4G38040.1	1.159	0.131762	0.264905	0.813267	1.183	0.241619	0.338646	0.696539
AT2G26500.2	1.148	0.180519	0.260798	0.683141	0.975	0.18137	0.280701	0.719503
AT2G26500.3	1.151	0.28972	0.330562	0.610463	1.405	0.323053	0.398861	0.643229
AT3G04880.1	NA	NA	NA	NA	NA	NA	NA	NA
AT4G35080.1	1.202	0.256462	0.356816	0.68654	0.724	0.1195	0.212851	0.776126
AT4G35080.3	1.263	0.2695	0.374892	0.686451	0.754	0.124077	0.221403	0.776861
AT1G80460.2	0.775	0.0970426	0.193383	0.815769	0.977	0.101284	0.203808	0.818426
AT1G20770.1	1.228	0.141437	0.298611	0.831598	0.787	0.09725	0.205915	0.834652
AT5G61020.1	1.073	0.222667	0.293228	0.659154	0.932	0.207481	0.278829	0.679523
AT2G36145.1	0.506	0.129938	0.168689	0.665133	0.809	0.16125	0.272955	0.766085
AT5G17070.1	1.236	0.398	0.358595	0.500494	1.087	0.4105	0.401947	0.541954
AT5G22770.1	1.134	0.209952	0.301259	0.703217	1.272	0.158571	0.275711	0.771631
AT5G04870.1	1.371	0.214142	0.298937	0.688364	1.594	0.262392	0.377423	0.705329
AT5G46430.2	1.222	0.435296	0.367207	0.476449	1.258	0.407667	0.423107	0.564456
AT5G46430.1	1.228	0.3838	0.353536	0.507831	1.152	0.36996	0.409122	0.590403
AT5G46250.2	1.086	0.264314	0.34756	0.666788	0.916	0.1468	0.256673	0.776845
AT3G48420.1	1.194	0.233321	0.341864	0.712166	1.195	0.203264	0.32082	0.74052
AT2G22170.1	0.805	0.159564	0.255006	0.74783	1.34	0.108333	0.277467	0.869307
AT4G19120.1	1.102	0.276103	0.332451	0.634615	1.284	0.257103	0.330396	0.661015
AT4G19120.2	1.001	0.227966	0.322691	0.701402	0.641	0.114897	0.221087	0.801051
AT1G04635.1	0.71	0.23	0.281978	0.62628	0.646	0.132421	0.229514	0.766714
AT3G06670.2	1.434	0.13807	0.294103	0.836311	1.248	0.139131	0.309739	0.849505
AT3G06670.1	1.408	0.266677	0.359369	0.678107	1.226	0.268395	0.382721	0.704474
AT1G43670.1	1.346	0.208062	0.325507	0.73389	1.413	0.224642	0.35381	0.73585
AT5G63905.1	1.087	0.242023	0.353845	0.71438	1.528	0.359977	0.447101	0.644421
AT4G09650.1	1.3	0.296526	0.356578	0.624825	1.74	0.400711	0.469482	0.61901
AT3G17712.2	NA	NA	NA	NA	NA	NA	NA	NA
AT2G31600.2	NA	NA	NA	NA	NA	NA	NA	NA
AT3G17712.3	0.427	0.06405	0.152469	0.85	0.601	0.06795	0.166754	0.866336
AT5G01530.1	1.031	0.261463	0.329887	0.655173	1.286	0.372683	0.420945	0.606934
AT1G20960.1	1.098	0.225704	0.325581	0.704259	1	0.225507	0.294545	0.668669
AT1G20960.2	1.1	0.226085	0.326323	0.704494	1.003	0.226085	0.295523	0.668995
AT1G30460.1	0.826	0.0576279	0.168561	0.899225	0.365	0.0532791	0.126444	0.853288
AT3G50670.1	1.139	0.218422	0.341224	0.737415	1.323	0.253156	0.357961	0.70002
AT3G50670.2	1.278	0.308479	0.409544	0.672417	1.479	0.35125	0.430907	0.641348
AT4G01330.1	1.122	0.225397	0.323216	0.704223	1.669	0.190115	0.383636	0.818742
AT4G01330.2	1.155	0.169701	0.300284	0.780595	1.726	0.15338	0.356914	0.85635
AT4G36420.1	0.916	0.389156	0.316222	0.461809	1.22	0.288156	0.35899	0.647933
AT5G09220.1	0.946	0.10181	0.211573	0.829084	1.507	0.172879	0.342205	0.812391
AT3G05410.2	0.613	0.0567234	0.147806	0.879555	1.444	0.062383	0.253743	0.948129
AT3G54050.1	0.493	0.0644571	0.127014	0.813678	0.918	0.1274	0.235832	0.791055
AT3G54050.2	0.489	0.0516977	0.116308	0.850014	0.935	0.114767	0.225641	0.809293
AT3G05410.1	0.82	0.0757872	0.197535	0.879604	2.325	0.106979	0.411973	0.942205
AT2G14460.1	1.516	0.270808	0.366264	0.676219	1.137	0.238848	0.296685	0.642115
AT3G19990.1	0.495	0.253375	0.18329	0.384713	0.711	0.234875	0.237693	0.547898
AT2G33570.1	1.416	0.214485	0.362007	0.765195	1.592	0.206176	0.365153	0.775621
AT1G60995.1	1.63	0.34565	0.41859	0.629747	1.237	0.322788	0.382009	0.625788
AT2G27100.1	1.171	0.236684	0.34421	0.705874	0.876	0.198842	0.25938	0.655485
AT4G13220.1	1.017	0.2706	0.364189	0.673725	1.279	0.2516	0.448826	0.779293
AT4G39330.2	0.908	0.155789	0.281803	0.790176	0.631	0.192447	0.235891	0.642054
AT5G12350.1	1.24	0.147189	0.29332	0.815655	1.052	0.116633	0.247721	0.830338
AT5G05450.1	0.64	0.0718437	0.167625	0.853075	0.42	0.02625	0.101666	0.9375
AT2G20760.1	1.239	0.227836	0.310955	0.675506	1.111	0.126452	0.266818	0.831133
AT5G65430.1	0.773	0.199111	0.250598	0.653859	1.394	0.314778	0.438366	0.694457
AT5G65430.2	0.771	0.192689	0.246874	0.661249	1.403	0.317622	0.441242	0.693477
AT5G65430.3	0.792	0.0901471	0.195779	0.843117	1.44	0.15152	0.342665	0.851992
AT3G17780.1	1.249	0.381453	0.398339	0.571615	1.121	0.279566	0.309632	0.59053
AT5G54440.1	0.985	0.119345	0.24465	0.821594	0.79	0.0520182	0.163681	0.913501
AT2G28430.1	1.144	0.327619	0.354001	0.585901	1.72	0.423881	0.459022	0.584916
AT2G01870.1	3.08	0.587944	0.765314	0.652855	2.842	0.673667	0.851652	0.653076
AT3G02860.2	1.193	0.16536	0.286107	0.77073	0.711	0.144798	0.217476	0.720325
AT1G48920.1	0.586	0.119717	0.181739	0.728602	0.944	0.161565	0.268748	0.762016
AT2G28890.1	1.163	0.09314	0.220635	0.856889	0.747	0.07017	0.173556	0.871035
AT1G08580.1	0.849	0.178611	0.240835	0.674771	0.525	0.195889	0.22219	0.599861
AT3G08610.1	1.033	0.316227	0.307852	0.534668	1.32	0.289455	0.393219	0.682432
AT1G09150.1	1.198	0.276754	0.342834	0.642429	1.293	0.253102	0.355214	0.694693
AT3G06700.1	1.45	0.314226	0.372429	0.621876	1.301	0.324151	0.391359	0.635766
AT2G01970.1	1.064	0.123093	0.273439	0.846155	1.12	0.144442	0.286832	0.817896
AT3G19650.1	1.161	0.2558	0.339395	0.669507	1.068	0.41415	0.394075	0.527581
AT5G65000.1	1.686	0.316857	0.442473	0.690179	1.446	0.238429	0.398068	0.75612
AT1G07020.1	0.963	0.204906	0.298011	0.71178	1.053	0.155609	0.261928	0.760843
AT5G65000.2	1.745	0.327939	0.457959	0.690192	1.468	0.240755	0.403528	0.75765
AT4G21150.2	1.28	0.111594	0.267147	0.8609	0.732	0.0812174	0.181724	0.839742
AT4G21150.3	0.725	0.0354583	0.132837	0.936387	0.461	0.0192083	0.0921199	0.958333
AT4G21150.1	1.279	0.12065	0.279681	0.854052	0.729	0.0775333	0.179007	0.849004
AT3G61080.1	0.611	0.0573333	0.160419	0.894729	0.657	0.0714	0.187363	0.881793
AT5G65020.2	NA	NA	NA	NA	NA	NA	NA	NA
AT5G65020.1	0.916	0.176763	0.274946	0.73607	1.081	0.249814	0.321209	0.662299
AT1G23290.1	0.851	0.203437	0.264272	0.663998	1.127	0.320375	0.373864	0.620781
AT5G47500.1	1.308	0.198182	0.371018	0.799208	1.514	0.239091	0.427417	0.780073
AT1G34000.1	1.237	0.30318	0.424275	0.695878	1.639	0.36116	0.422607	0.618398
AT5G23940.1	1.926	0.405	0.423944	0.560866	1.487	0.3762	0.449705	0.631511
AT1G13870.1	1.123	0.422176	0.442962	0.569819	1.589	0.233559	0.362358	0.711612
AT3G05900.1	1.026	0.219788	0.306927	0.694294	1.089	0.172879	0.273598	0.738937
AT1G55140.1	NA	NA	NA	NA	NA	NA	NA	NA
AT2G26560.1	1.497	0.401429	0.380028	0.520574	1.667	0.4005	0.536481	0.675619
AT2G39080.1	0.661	0.1005	0.188195	0.793338	0.752	0.0557812	0.166925	0.907861
AT4G02120.1	0.981	0.204432	0.283061	0.685287	1.288	0.208659	0.357087	0.767927
AT4G31420.1	1.158	0.222919	0.323796	0.710469	0.887	0.198244	0.270863	0.685958
AT2G38870.1	1.507	0.388601	0.41649	0.581545	1.358	0.345348	0.371462	0.583831
AT5G38480.2	1.263	0.236338	0.318827	0.676407	1.511	0.296845	0.392056	0.672048
AT5G38480.1	1.236	0.239338	0.316824	0.669356	1.476	0.299507	0.389707	0.666356
AT3G02110.1	1.192	0.13787	0.285155	0.823626	1.037	0.101304	0.248739	0.867802
AT1G17470.1	1.162	0.228913	0.309659	0.682364	1.437	0.26687	0.35527	0.670295
AT5G49470.3	1.043	0.115026	0.247449	0.833694	0.727	0.0784935	0.18689	0.855673
AT3G14400.1	1.333	0.170504	0.306846	0.779121	0.978	0.149345	0.255514	0.766389
AT1G17470.2	1.16	0.17387	0.310629	0.786572	1.443	0.210674	0.37567	0.78375
AT1G09130.3	0.875	0.208722	0.272961	0.666304	1.032	0.199139	0.314277	0.743568
AT1G09130.2	0.869	0.263407	0.287056	0.585937	1.048	0.257963	0.346565	0.680854
AT1G09130.1	0.868	0.264778	0.284693	0.579744	1.024	0.252222	0.338574	0.680535
AT1G55150.1	1.348	0.139122	0.317998	0.855608	1.476	0.162878	0.34195	0.832112
AT1G07780.4	1.497	0.0789277	0.22979	0.901654	1.379	0.0909617	0.249868	0.893147
AT1G07780.5	1.216	0.107992	0.237437	0.840091	1.133	0.102543	0.253008	0.872333
AT1G07780.2	1.175	0.163736	0.265379	0.7415	1.101	0.148126	0.284636	0.805251
AT1G07780.3	1.456	0.0768128	0.223539	0.901577	1.337	0.0877574	0.241762	0.893571
AT1G07780.1	1.354	0.159737	0.296008	0.791641	1.25	0.176677	0.310742	0.777219
AT3G10070.1	0.455	0.0413636	0.130803	0.909091	0.501	0.0455455	0.144027	0.909091
AT5G19010.1	1.374	0.155233	0.273446	0.772825	1.523	0.127863	0.257117	0.811851
AT4G25630.1	2.105	0.336179	0.474481	0.686661	1.849	0.343946	0.522555	0.728119
AT4G16360.3	1.423	0.142596	0.288191	0.816212	1.201	0.157156	0.310014	0.81522
AT4G16360.2	1.328	0.15489	0.273635	0.774706	1.066	0.160181	0.280909	0.777288
AT4G16360.1	1.315	0.163785	0.278	0.760412	1.046	0.163585	0.280005	0.769334
AT2G29970.1	1.448	0.198905	0.324381	0.748346	1.214	0.173263	0.313981	0.789173
AT5G19030.2	1.015	0.186357	0.330706	0.781306	1.298	0.281536	0.400437	0.701152
AT5G16750.1	0.671	0.0752973	0.175153	0.849867	0.94	0.0963514	0.231256	0.861908
AT4G26970.1	1.08	0.109247	0.209898	0.79406	0.681	0.0926234	0.181633	0.807245
AT3G22320.1	1.102	0.248554	0.331876	0.676177	1.406	0.261077	0.370144	0.699256
AT1G68160.1	0.572	0.0429	0.15066	0.925	0.868	0.0255	0.125054	0.961819
AT3G09490.1	0.775	0.0395	0.157104	0.944571	0.548	0.078625	0.182922	0.846532
AT5G66210.4	1.016	0.0343571	0.148478	0.953008	0.808	0.0664286	0.185942	0.893105
AT3G11720.1	0.822	0.0646452	0.179025	0.88714	0.594	0.0714409	0.160719	0.841843
AT5G66210.1	0.979	0.033131	0.143156	0.953001	0.766	0.062381	0.175065	0.894075
AT4G13430.1	1.081	0.309963	0.323406	0.570038	0.837	0.192741	0.271361	0.700142
AT5G66210.3	1.006	0.0340238	0.147049	0.953022	0.823	0.066119	0.186408	0.895562
AT5G22330.1	1.134	0.306292	0.343343	0.601947	1.242	0.320646	0.377799	0.621956
AT1G06960.1	0.904	0.141441	0.256636	0.781347	0.849	0.136206	0.2628	0.804699
AT5G59613.2	1.604	0.240206	0.343833	0.696609	1.563	0.265349	0.395426	0.710652
AT1G06960.3	0.917	0.0819559	0.204297	0.869299	0.536	0.0861618	0.194112	0.838848
AT1G06960.2	0.916	0.139829	0.257445	0.786292	0.856	0.134171	0.262977	0.809723
AT3G24515.1	0.696	0.119154	0.206633	0.756352	0.92	0.096359	0.236533	0.869188
AT1G02050.1	0.7	0.0428108	0.148225	0.927723	0	0	0	NA
AT4G26080.1	1.05	0.090851	0.205906	0.847102	0.72	0.0679038	0.146944	0.837439
AT3G52150.2	0.95	0.2755	0.318593	0.618471	1.347	0.211094	0.366748	0.776106
AT3G52150.1	0.939	0.272	0.314925	0.619019	1.321	0.203781	0.358302	0.780119
AT3G52890.2	1.107	0.106932	0.240199	0.84484	0.942	0.0863684	0.208947	0.863972
AT2G43410.3	1.409	0.13574	0.275062	0.81239	1.105	0.161092	0.269445	0.758742
AT3G52890.1	0.992	0.0457082	0.165685	0.933863	0.978	0.0451836	0.158363	0.928992
AT5G09590.1	1.022	0.14772	0.258522	0.771742	0.74	0.10121	0.196762	0.805014
AT1G62422.1	1.224	0.0437143	0.227146	0.964286	1.067	0.0571429	0.218039	0.940491
AT3G12570.1	1.151	0.137432	0.251468	0.776662	0.874	0.0869773	0.226319	0.881173
AT3G12570.3	1.158	0.125229	0.242774	0.802145	1.132	0.102855	0.258921	0.875147
AT3G12570.2	1.174	0.216401	0.305325	0.692435	1.134	0.17034	0.282848	0.752202
AT3G12570.4	1.168	0.0905275	0.208444	0.843787	1.01	0.0864286	0.215564	0.870766
AT5G55070.1	1.224	0.17038	0.317217	0.796879	1.103	0.12467	0.255213	0.822965
AT4G02520.1	1.349	0.206582	0.32134	0.73371	1.748	0.227687	0.35131	0.72203
AT3G52140.4	1.17	0.157604	0.274059	0.772038	1.664	0.222928	0.395724	0.78176
AT2G40830.3	1.618	0.238918	0.406308	0.766207	1.583	0.220926	0.341151	0.725613
AT2G40830.1	1.568	0.329769	0.431226	0.665737	1.588	0.275393	0.362538	0.661592
AT5G29000.1	0.556	0.0328367	0.11302	0.926168	0.381	0.0338163	0.0883988	0.879682
AT3G52140.1	1.148	0.211658	0.301044	0.698945	1.62	0.299566	0.433781	0.709277
AT3G52140.2	1.165	0.15691	0.272955	0.772145	1.654	0.221333	0.393333	0.782109
AT5G29000.2	0.355	0.0221875	0.0859318	0.9375	0.244	0.061	0.105655	0.75
AT1G10570.1	0.911	0.17968	0.324149	0.782315	1.342	0.35484	0.436575	0.638278
AT2G36000.2	1.005	0.158158	0.25263	0.745187	1.873	0.294842	0.480257	0.752689
AT1G10570.2	1.174	0.225	0.370916	0.755309	1.337	0.300867	0.41546	0.685619
AT5G63310.1	1.173	0.383	0.416217	0.580716	1.311	0.516563	0.51913	0.538423
AT5G53120.4	1.462	0.0674568	0.258589	0.942673	0.735	0.0495309	0.124461	0.870063
AT2G05310.1	0.807	0.0758636	0.171442	0.847772	0.917	0.0706818	0.182516	0.875446
AT4G38090.4	1.775	0.115924	0.336537	0.903556	1.48	0.189727	0.393646	0.828813
AT2G42770.1	1.899	0.305816	0.485075	0.739073	1.151	0.261947	0.378939	0.705482
AT4G12970.1	0.939	0.287062	0.320559	0.599445	1.204	0.314719	0.352846	0.593384
AT4G38090.1	1.687	0.264235	0.47192	0.77932	1.444	0.289765	0.463322	0.745528
AT1G80810.2	0.393	0.0585319	0.139918	0.851064	0.354	0.0225957	0.0865351	0.93617
AT4G38090.3	1.763	0.285647	0.497196	0.770423	1.458	0.298765	0.470662	0.739909
AT4G38090.2	1.87	0.295412	0.524111	0.777052	1.613	0.338	0.524546	0.734096
AT3G22520.1	1.33	0.3385	0.340306	0.536235	0.662	0.222604	0.276156	0.634739
AT4G00026.1	0.789	0.144364	0.227506	0.737526	0.728	0.121758	0.219538	0.788588
AT5G50640.1	0.882	0.0699194	0.173896	0.867357	1.035	0.0721774	0.201827	0.88889
AT1G55330.1	1.294	0.383111	0.399519	0.571883	1.14	0.325148	0.340078	0.572627
AT1G48790.1	1.107	0.143617	0.259359	0.779017	1.055	0.174426	0.269242	0.728876
AT1G35460.1	0.949	0.10613	0.244271	0.856538	1.073	0.11563	0.244576	0.834016
AT1G49470.1	1.819	0.344811	0.483517	0.691674	1.374	0.303378	0.433274	0.704157
AT5G52280.1	0.636	0.061	0.138154	0.841767	0.9	0.0987358	0.183425	0.783785
AT1G73820.1	0.894	0.104097	0.226112	0.83903	0.604	0.116516	0.195655	0.755296
AT5G53120.3	1.476	0.0706471	0.259225	0.937822	0.744	0.0508471	0.122783	0.857767
AT1G75220.1	1.59	0.298178	0.431055	0.707634	1.955	0.300402	0.492858	0.756898
AT3G48560.1	0.775	0.131278	0.218049	0.75556	1.211	0.229722	0.330071	0.694357
AT1G16320.1	1.412	0.333117	0.36733	0.593086	1.191	0.301583	0.369446	0.642967
AT1G11430.1	0.662	0.0931765	0.21124	0.842766	0.562	0.126471	0.175807	0.688317
AT4G01100.2	1.313	0.178045	0.291273	0.743845	1.177	0.183536	0.262981	0.700404
AT4G01100.1	1.304	0.183462	0.292568	0.734179	1.176	0.192358	0.265841	0.685792
AT3G62220.1	1.387	0.164163	0.34848	0.836745	1.464	0.11398	0.323129	0.899567
AT2G47640.4	1.27	0.255321	0.337811	0.672603	0.746	0.202698	0.258107	0.65563
AT1G07810.1	1.788	0.267442	0.439543	0.750617	1.522	0.289942	0.364704	0.641735
AT1G80500.1	1.329	0.305116	0.378023	0.646827	1.322	0.267806	0.349274	0.666394
AT2G47640.1	1.062	0.237037	0.314682	0.6761	1.222	0.235852	0.309715	0.668269
AT2G47640.2	1.034	0.215537	0.28453	0.670942	1.239	0.229611	0.308345	0.67407
AT2G47640.3	1.219	0.260528	0.316694	0.632182	1.023	0.207811	0.278069	0.675829
AT5G57760.1	NA	NA	NA	NA	NA	NA	NA	NA
AT1G68590.1	1.396	0.116923	0.270455	0.84558	0.871	0.13341	0.243658	0.793004
AT1G68590.2	1.393	0.110282	0.265055	0.853874	0.816	0.119744	0.229304	0.807368
AT3G19180.2	0.879	0.08625	0.211056	0.860275	0.622	0.0457353	0.162344	0.926471
AT4G00585.1	1.537	0.230687	0.365055	0.738013	1.741	0.222125	0.352549	0.735393
AT1G75510.1	1.347	0.409333	0.363711	0.496737	1.341	0.389333	0.366438	0.522598
AT4G30160.2	0.635	0.0711284	0.170047	0.858435	0.639	0.0682661	0.168006	0.866151
AT1G73230.1	1.219	0.25669	0.323246	0.647107	1.424	0.214746	0.326131	0.718645
AT1G66410.2	1.328	0.17259	0.326235	0.803934	1.108	0.170752	0.30809	0.789154
AT1G66410.1	1.342	0.294422	0.383888	0.667619	1.084	0.224547	0.306586	0.685994
AT1G04430.2	1.224	0.0731413	0.208283	0.89591	0.81	0.06175	0.174812	0.898803
AT4G12040.2	1.146	0.0547663	0.173174	0.917405	1.313	0.0809119	0.223111	0.89395
AT5G07470.1	0.848	0.111778	0.202486	0.776629	0.692	0.115089	0.187889	0.743558
AT4G12040.1	1.105	0.143227	0.238535	0.759846	1.224	0.170168	0.27946	0.752997
AT4G27280.1	1.298	0.546643	0.366048	0.382552	1.871	0.742482	0.502317	0.385102
AT1G76800.1	1.221	0.284452	0.346784	0.629665	1.484	0.401419	0.500551	0.642673
AT1G69230.1	0.791	0.0497391	0.16543	0.921367	0.703	0.0534565	0.163293	0.909976
AT5G38600.1	0.885	0.114091	0.236543	0.827903	0.944	0.106109	0.217692	0.817714
AT5G65310.1	1.287	0.214721	0.296285	0.687197	1.1	0.188777	0.299918	0.745368
AT3G11170.1	1.3	0.27402	0.352102	0.661217	1.564	0.353707	0.44054	0.649129
AT1G26760.1	NA	NA	NA	NA	NA	NA	NA	NA
AT1G76820.1	0.865	0.095127	0.219367	0.855686	1.102	0.0841587	0.215869	0.876674
AT3G58640.2	1.421	0.177174	0.334046	0.802261	1.621	0.203299	0.376255	0.793981
AT5G53460.2	0.885	0.174233	0.240968	0.688849	0.887	0.130302	0.207859	0.742279
AT3G54400.1	1.507	0.382618	0.498668	0.668521	1.008	0.287059	0.329958	0.612699
AT1G24040.1	0.785	0.0845238	0.21339	0.872703	0.879	0.094619	0.238893	0.87272
AT4G35830.1	1.12	0.169772	0.269705	0.741839	1.48	0.217123	0.352774	0.74951
AT4G22140.1	1.584	0.238274	0.372966	0.732727	2.335	0.290616	0.496709	0.767059
AT4G22140.2	1.494	0.239596	0.361584	0.717817	2.104	0.270527	0.454612	0.76094
AT2G33730.1	1.032	0.241843	0.270313	0.597561	1.113	0.289059	0.32935	0.609913
AT3G26782.1	0	0	0	NA	0	0	0	NA
AT4G33666.1	1.228	0.139724	0.286193	0.825183	1.202	0.233382	0.307723	0.667786
AT4G21810.1	1.472	0.261319	0.415354	0.745112	1.604	0.265083	0.462992	0.779021
AT5G11260.1	1.428	0.20459	0.373186	0.789922	1.441	0.148971	0.307193	0.825661
AT4G05420.1	0.959	0.199037	0.309064	0.734377	1.505	0.173207	0.328371	0.798379
AT4G05420.2	0.955	0.198073	0.30767	0.734497	1.499	0.172317	0.326975	0.798657
AT3G01540.3	0.932	0.214905	0.288346	0.678498	1.393	0.245442	0.352302	0.702115
AT3G01540.4	1.366	0.27498	0.353089	0.660881	1.393	0.27941	0.38309	0.686464
AT4G18390.1	1.108	0.126713	0.28244	0.845178	1.129	0.125226	0.250544	0.811422
AT3G07950.1	1.141	0.247836	0.363028	0.712851	1.174	0.157623	0.304361	0.802943
AT3G55260.1	0.947	0.132256	0.266799	0.814856	0.732	0.0661538	0.176789	0.882528
AT5G56950.1	1.263	0.140798	0.267872	0.798101	0.916	0.121862	0.244142	0.819541
AT3G24120.2	0.911	0.0764528	0.192078	0.872635	0.679	0.0346698	0.123469	0.929039
AT3G24120.1	0.785	0.184208	0.256392	0.689013	0.586	0.0860833	0.172379	0.809092
AT1G50490.1	1.183	0.210628	0.336655	0.746292	1.607	0.174962	0.340815	0.803136
AT1G65470.2	1.441	0.201135	0.359801	0.781095	1.181	0.188135	0.308254	0.746812
AT3G23600.2	1.101	0.221958	0.332888	0.719299	0.812	0.198	0.273289	0.689271
AT3G23600.1	1.074	0.217208	0.325254	0.718852	0.794	0.194917	0.267793	0.687473
AT1G54050.1	1.604	0.557738	0.457264	0.463482	1.704	0.550024	0.531842	0.536236
AT2G39930.1	0.689	0.100115	0.22896	0.849951	0.779	0.0299615	0.149808	0.961538
AT2G38810.3	0.913	0.0387407	0.150054	0.939735	0.902	0.0439444	0.184927	0.949642
AT2G38810.2	0.892	0.1276	0.279339	0.839812	0.885	0.1444	0.297858	0.822576
AT2G38810.1	0.913	0.0266531	0.139475	0.967309	0.892	0.0411837	0.165769	0.94543
AT5G10400.1	1.312	0.438357	0.389125	0.498927	1.569	0.379643	0.420875	0.582874
AT4G22320.1	1.072	0.267712	0.318867	0.628414	1.327	0.311593	0.333749	0.575565
AT4G22320.2	1.074	0.188088	0.289602	0.732553	1.341	0.210868	0.309355	0.709898
AT4G23600.1	1.159	0.326643	0.334006	0.550522	0.715	0.326679	0.212206	0.367517
AT1G65280.1	1.435	0.404508	0.397788	0.543837	1.395	0.304292	0.342858	0.596393
AT4G23600.3	1.194	0.336357	0.343947	0.550504	0.723	0.33075	0.214317	0.366595
AT1G13880.1	1.406	0.160323	0.302102	0.791674	1.215	0.10451	0.230604	0.839846
AT3G26510.4	1.182	0.324929	0.352347	0.585011	1.79	0.368786	0.522936	0.700465
AT3G26510.5	1.288	0.400515	0.39773	0.547008	1.902	0.465015	0.539651	0.616727
AT4G15130.1	0.898	0.241716	0.287328	0.627486	0.96	0.262045	0.288146	0.593128
AT3G47370.1	1.598	0.342217	0.448343	0.670408	1.564	0.299711	0.381229	0.655555
AT3G26510.1	1.212	0.355452	0.367649	0.563536	1.795	0.390024	0.531739	0.685165
AT3G26510.2	1.192	0.318667	0.353277	0.594957	1.802	0.36869	0.525431	0.70238
AT3G26510.3	1.25	0.334405	0.370417	0.59457	1.887	0.378667	0.546642	0.707217
AT3G46610.1	0.876	0.107491	0.2106	0.810359	0.91	0.12025	0.207158	0.766803
AT2G15280.2	0.409	0.0876429	0.167823	0.785714	0.416	0.0594286	0.14557	0.857143
AT2G15280.1	0.41	0.111818	0.182598	0.727273	0.418	0.076	0.16122	0.818182
AT2G30260.1	1.304	0.26722	0.350045	0.666137	1.138	0.256805	0.335351	0.662931
AT1G12880.1	1.028	0.0622941	0.166053	0.880294	0.557	0.0381691	0.120405	0.913123
AT4G32570.1	0.747	0.0980225	0.184038	0.790623	1.118	0.119326	0.227105	0.786993
AT5G14740.5	0.636	0.0242097	0.100472	0.949824	0.725	0.0267823	0.114293	0.951926
AT5G65620.1	0.535	0.15725	0.192888	0.618133	0.405	0.112583	0.172837	0.716445
AT1G72250.2	0.517	0.0235	0.107691	0.954545	0.548	0.0498182	0.157539	0.909091
AT1G14410.1	1.048	0.221615	0.326645	0.714078	1.111	0.259596	0.33594	0.658207
AT2G30200.2	0.844	0.0375664	0.141379	0.940513	1.012	0.0423077	0.166098	0.944745
AT3G16180.1	1.183	0.225784	0.351483	0.733228	1.594	0.237511	0.416572	0.775855
AT2G30200.1	0.807	0.18232	0.265449	0.710592	0.951	0.2274	0.312272	0.685917
AT1G63120.1	1.522	0.169104	0.315777	0.786012	1.563	0.257417	0.414759	0.746887
AT4G34030.1	1.112	0.190089	0.293874	0.732502	1.106	0.161554	0.259621	0.741771
AT2G41750.1	NA	NA	NA	NA	NA	NA	NA	NA
AT4G22930.1	1.263	0.160532	0.299061	0.79189	0.905	0.0978511	0.226852	0.854265
AT4G37310.1	0.755	0.0489844	0.155591	0.913203	0.587	0.0457969	0.118396	0.871913
AT3G60380.1	1.097	0.214899	0.296581	0.676433	0.969	0.106783	0.226233	0.830772
AT5G16070.1	0.895	0.162577	0.250277	0.729144	0.587	0.117113	0.202534	0.769717
AT4G33650.2	1.193	0.100008	0.249415	0.872047	1.598	0.119252	0.287495	0.864224
AT1G78570.1	0.88	0.0994239	0.186424	0.786025	0.887	0.1135	0.184655	0.734938
AT4G33650.1	1.17	0.154421	0.292313	0.79788	1.556	0.187658	0.339615	0.784427
AT1G27350.1	1.797	0.368431	0.461422	0.641567	1.485	0.351754	0.41669	0.625346
AT5G64360.3	1.041	0.187317	0.28601	0.724886	1.111	0.152512	0.28692	0.794701
AT5G64360.1	1.186	0.211049	0.32593	0.729249	1.249	0.17161	0.322794	0.794659
AT2G30950.1	1.52	0.25012	0.377587	0.71557	1.145	0.2302	0.315666	0.687364
AT1G18700.2	0.948	0.123333	0.277159	0.848485	0.936	0.0933636	0.233199	0.872267
AT1G18700.1	0.917	0.119242	0.268011	0.848531	0.899	0.0897576	0.224162	0.87224
AT1G68190.1	0.915	0.1326	0.256373	0.806709	1.029	0.18616	0.342701	0.786128
AT1G18700.4	0.916	0.0708065	0.209969	0.905893	0.899	0.0549516	0.176632	0.917613
AT5G10920.1	1.632	0.381839	0.458949	0.627524	1.556	0.339548	0.428718	0.648937
AT1G53885.1	1.168	0.129795	0.274158	0.833451	1.263	0.155795	0.316741	0.822668
AT3G10040.1	0.812	0.0239592	0.119075	0.963095	1.039	0.0239694	0.138552	0.972724
AT1G69250.1	0.823	0.0262214	0.111276	0.949463	0.599	0.0370611	0.114866	0.909968
AT1G69250.2	0.842	0.0268321	0.113907	0.949497	0.614	0.038229	0.118135	0.909296
AT3G03460.1	0.784	0.0803421	0.212696	0.883368	0.575	0.0487895	0.146794	0.90771
AT3G58670.1	1.564	0.15942	0.304059	0.794452	1.212	0.142348	0.295557	0.82638
AT1G72640.2	0.94	0.141265	0.216582	0.722388	1.037	0.203286	0.316244	0.736583
AT3G11630.1	0.84	0.195194	0.280114	0.7073	1.238	0.164129	0.283618	0.76183
AT2G47840.1	0.987	0.161743	0.281136	0.777167	1.018	0.1704	0.286525	0.766082
AT3G54090.1	0.492	0.123769	0.177072	0.700961	0.736	0.0953077	0.228139	0.86062
AT2G33770.1	1.804	0.215179	0.34461	0.739644	1.65	0.201744	0.321634	0.740011
AT3G59310.1	0.935	0.137815	0.26883	0.807633	1.481	0.117704	0.310563	0.884612
AT5G53770.1	1.057	0.178432	0.296714	0.759918	1.259	0.240023	0.357325	0.71945
AT1G08180.1	1.073	0.0751111	0.241098	0.917671	1.568	0.235407	0.449308	0.799
AT5G57930.1	0.323	0.00734091	0.0481376	0.977273	0.328	0.0101591	0.0516113	0.965172
AT5G57930.2	0.646	0.126068	0.178297	0.690812	0.767	0.0949091	0.196153	0.827913
AT5G52370.1	0.95	0.241111	0.286856	0.629493	1.083	0.262956	0.311045	0.624269
AT1G20510.1	1.56	0.324294	0.46377	0.673104	1.826	0.335588	0.530912	0.735743
AT1G20510.2	1.62	0.479182	0.548055	0.588089	1.897	0.560818	0.609872	0.577668
AT5G14570.1	1.989	0.259532	0.424301	0.74581	1.551	0.188962	0.359082	0.803943
AT1G25450.1	1.221	0.171545	0.328279	0.80598	1.034	0.134848	0.265213	0.813408
AT2G17530.2	1.265	0.182326	0.29973	0.7509	0.946	0.159372	0.260523	0.754109
AT5G09740.1	0.584	0.0628333	0.160652	0.87977	0.879	0.130933	0.241983	0.794739
AT2G44620.1	1.035	0.211025	0.311365	0.711595	1.369	0.2069	0.358313	0.772898
AT4G35110.4	0	0	0	NA	0	0	0	NA
AT4G35110.3	0.529	0.0158846	0.082617	0.96694	0	0	0	NA
AT4G35110.2	1.051	0.0505	0.185993	0.934633	0.703	0.0405385	0.148671	0.935922
AT4G35110.1	1.058	0.0473731	0.176549	0.935323	0.708	0.0453582	0.152362	0.925373
AT2G42590.3	1.374	0.20948	0.320469	0.718724	1.198	0.18438	0.277932	0.715683
AT2G42590.2	1.312	0.19872	0.305332	0.720246	1.152	0.17497	0.265768	0.718294
AT2G42590.1	1.285	0.19393	0.298839	0.72129	1.125	0.16956	0.258623	0.719646
AT4G26640.2	0.888	0.159657	0.280694	0.772952	0.665	0.0559429	0.149029	0.88176
AT1G16880.2	1.204	0.248534	0.324104	0.66696	1.436	0.303017	0.40159	0.666347
AT1G16880.1	1.104	0.187837	0.264313	0.693088	1.252	0.191293	0.306893	0.738779
AT2G27450.2	0.581	0.0387333	0.144927	0.933333	0.432	0.0288	0.10776	0.933333
AT4G09180.1	1.26	0.299192	0.367022	0.641846	1.165	0.266644	0.307671	0.611696
AT5G46390.2	1.012	0.158714	0.288582	0.779285	1.029	0.159286	0.293277	0.785714
AT1G28420.1	0.683	0.0978056	0.205305	0.825436	0.397	0.0110278	0.0652412	0.972222
AT5G46390.1	NA	NA	NA	NA	NA	NA	NA	NA
AT2G21620.2	1.7	0.235759	0.380687	0.745435	1.099	0.191134	0.279929	0.711112
AT4G35100.1	1.393	0.333551	0.361964	0.575756	1.206	0.370367	0.360486	0.540443
AT4G35100.2	1.424	0.233565	0.343829	0.707384	1.223	0.267507	0.347794	0.66764
AT2G21620.1	1.6	0.212804	0.356204	0.758725	1.049	0.173714	0.262473	0.722731
AT4G00950.1	1.015	0.310278	0.374226	0.633786	1.031	0.314083	0.325309	0.564481
AT1G32790.1	1.125	0.113458	0.277567	0.871479	1.333	0.121365	0.272221	0.846693
AT4G00090.1	0.844	0.118167	0.245055	0.828632	0.555	0.0691806	0.1497	0.837296
AT1G29970.1	1.17	0.255657	0.310441	0.622305	1.272	0.181806	0.342471	0.799601
AT3G18000.1	0.947	0.211261	0.30319	0.702796	0.87	0.235774	0.273138	0.616765
AT1G29970.2	0.967	0.238429	0.26144	0.574836	0.882	0.132607	0.243092	0.788191
AT5G57700.3	NA	NA	NA	NA	NA	NA	NA	NA
AT5G57700.2	0.72	0.112262	0.201321	0.770564	0.753	0.0815246	0.195362	0.860608
AT5G57700.1	0.725	0.0268689	0.121418	0.956181	0.475	0.0311475	0.117579	0.934426
AT2G02230.1	1.33	0.386447	0.41498	0.58201	1.73	0.514947	0.467343	0.503225
AT5G10870.1	0.979	0.149189	0.268669	0.785628	0.906	0.128943	0.235479	0.787152
AT2G43820.1	1.256	0.650261	0.407654	0.358978	1.051	0.463522	0.347743	0.428372
AT1G29950.2	1.65	0.193366	0.354868	0.790568	1.679	0.163703	0.316934	0.805887
AT1G29950.1	1.606	0.220027	0.359204	0.75013	1.621	0.197603	0.338189	0.764582
AT3G07060.1	0.8	0.109941	0.245137	0.843584	0.798	0.0874588	0.211449	0.861017
AT1G64140.1	1.323	0.196021	0.274063	0.687999	1.25	0.189882	0.283237	0.716186
AT4G33630.1	1.255	0.241263	0.320572	0.669612	1.145	0.170184	0.300383	0.780053
AT4G33630.2	1.279	0.244132	0.32608	0.671579	1.175	0.174605	0.308438	0.78034
AT3G51420.1	1.24	0.14312	0.326416	0.85062	1.221	0.24264	0.344458	0.697699
AT3G48760.1	0.608	0.0963182	0.191945	0.81549	0.599	0.0569545	0.150383	0.886672
AT1G17880.1	1.179	0.203233	0.3108	0.721557	0.701	0.0777	0.167642	0.839375
AT1G36980.1	1.043	0.102724	0.267875	0.883148	0.762	0.073069	0.183751	0.876243
AT5G62190.1	1.051	0.144184	0.24125	0.74511	0.806	0.188388	0.22398	0.621411
AT2G38950.1	0.834	0.0921446	0.204686	0.842312	0.797	0.0660964	0.176488	0.885421
AT1G32220.1	1.507	0.152091	0.299197	0.805203	1.412	0.148202	0.287006	0.803332
AT4G24830.2	0.601	0.05265	0.14756	0.895353	0.838	0.0841875	0.199223	0.861464
AT5G10660.2	7	0.583333	1.9347	0.916667	0	0	0	NA
AT2G14120.1	1.13	0.110672	0.241677	0.840845	0.62	0.0432344	0.125185	0.902551
AT4G17330.1	0.68	0.117	0.208754	0.774444	0.796	0.145381	0.256543	0.776933
AT2G14120.2	1.132	0.105439	0.241622	0.853262	0.619	0.0414561	0.123239	0.907633
AT4G26480.1	1.096	0.158875	0.270714	0.764794	1.237	0.171477	0.300583	0.770125
AT4G02890.1	1.449	0.364564	0.403884	0.595688	1.112	0.31259	0.366945	0.624408
AT4G02890.2	1.337	0.3694	0.419876	0.610121	1.056	0.2842	0.326167	0.613591
AT1G07350.2	0.624	0.105688	0.186965	0.764877	0.515	0.119156	0.172717	0.695917
AT4G02890.4	1.289	0.3519	0.390385	0.598981	1.044	0.283	0.324154	0.61303
AT3G26980.1	1.437	0.126194	0.272831	0.839296	1.472	0.176361	0.322727	0.783552
AT2G41231.1	NA	NA	NA	NA	NA	NA	NA	NA
AT3G17120.2	1.9	0.132657	0.324513	0.867593	0.976	0.109881	0.233816	0.83653
AT1G74510.1	1.148	0.136857	0.26779	0.807815	0.861	0.105084	0.202717	0.806522
AT1G74510.2	1.188	0.0118238	0.102141	0.98793	0.545	0.00343523	0.0395381	0.992052
AT5G13810.1	1.341	0.203137	0.328327	0.74914	0.997	0.180474	0.278656	0.731888
AT4G09890.1	1.518	0.420636	0.409381	0.535196	1.522	0.46053	0.412544	0.500989
AT4G27990.1	0.826	0.206577	0.275562	0.678881	1.39	0.2385	0.348566	0.692587
AT1G22690.1	1.122	0.29388	0.358395	0.638356	1.307	0.25924	0.446811	0.768165
AT3G52850.1	0.948	0.122787	0.211	0.756297	0.656	0.0810337	0.163998	0.816239
AT1G74910.1	0.867	0.0989041	0.202453	0.824677	1.089	0.100623	0.243393	0.86341
AT3G04730.1	1.289	0.322643	0.369439	0.611309	1.723	0.340813	0.431532	0.651548
AT1G74910.3	0.876	0.100178	0.204805	0.824325	1.102	0.101829	0.246309	0.863414
AT1G74910.2	0.859	0.103352	0.212081	0.82573	1.081	0.0863619	0.232106	0.887164
AT1G51720.1	1.585	0.268106	0.367557	0.68244	1.414	0.272887	0.388009	0.701018
AT2G44360.1	1.993	0.294121	0.432665	0.701895	1.972	0.336379	0.458953	0.67589
AT2G44680.1	1.426	0.291153	0.376642	0.66209	1.709	0.359663	0.435237	0.625192
AT5G03540.1	0.58	0.107579	0.185292	0.758884	0.603	0.0718421	0.171044	0.859225
AT5G03540.2	1.04	0.128481	0.244352	0.801179	1.085	0.113431	0.233473	0.825251
AT2G44680.2	1.433	0.292837	0.378455	0.6617	1.731	0.365602	0.440839	0.623721
AT5G05950.1	1.047	0.200042	0.32942	0.751276	1.322	0.245917	0.340917	0.669095
AT4G38490.1	1.211	0.03878	0.182007	0.957473	1.289	0.0566	0.216097	0.939986
AT5G60390.2	1.537	0.376031	0.43413	0.602699	1.333	0.251937	0.360267	0.690717
AT3G46670.1	1.664	0.334464	0.431589	0.657871	0.956	0.226206	0.270245	0.631595
AT1G30580.1	1.422	0.299674	0.365834	0.635202	1.118	0.383651	0.364468	0.530126
AT5G60390.3	0.578	0.0363448	0.117226	0.916967	0.305	0.0145862	0.057351	0.941224
AT1G75760.1	1.428	0.168154	0.289477	0.758824	1.089	0.134073	0.271955	0.82236
AT5G42000.2	1.264	0.337868	0.391213	0.615953	1.527	0.304529	0.399036	0.666866
AT5G45710.2	1.092	0.0671635	0.204338	0.909523	1.087	0.0749167	0.215043	0.899376
AT4G34090.1	1.143	0.354806	0.346969	0.539099	1.24	0.2945	0.382072	0.662663
AT4G34090.3	0.957	0.204741	0.267237	0.662841	1.139	0.17987	0.294007	0.751309
AT4G34090.2	1.17	0.36425	0.354715	0.537298	1.257	0.298861	0.387218	0.662177
AT5G45710.1	1.085	0.0564067	0.182168	0.914966	1.089	0.05558	0.191079	0.926344
AT5G20280.1	1.23	0.150316	0.291209	0.810716	1.46	0.146092	0.258278	0.760089
AT2G43770.1	1.646	0.336703	0.427101	0.650782	1.626	0.339828	0.454301	0.673953
AT2G39720.1	1.713	0.226915	0.363213	0.731108	0.818	0.210966	0.290215	0.68332
AT3G53670.1	1.579	0.273768	0.391871	0.701663	1.571	0.192782	0.366022	0.801388
AT3G53670.2	1.618	0.221137	0.377288	0.767477	1.613	0.162673	0.343844	0.829337
AT3G50910.1	1.313	0.154306	0.27777	0.779369	0.891	0.144674	0.210988	0.707662
AT4G36870.1	0.763	0.16851	0.251491	0.714114	0.707	0.152196	0.211706	0.680924
AT4G36870.2	1.225	0.1374	0.268305	0.809426	0.989	0.180427	0.264805	0.710399
AT1G11790.1	1.333	0.175554	0.307392	0.771672	1.375	0.114634	0.266516	0.855996
AT3G06070.1	1.353	0.487936	0.451701	0.519753	1.771	0.53366	0.550249	0.566265
AT2G06510.2	0	0	0	NA	0	0	0	NA
AT2G45700.1	0.523	0.0475455	0.150352	0.909091	0.788	0.116818	0.255457	0.838769
AT1G59710.1	0.785	0.0215652	0.10359	0.961384	1.059	0.049764	0.179692	0.936122
AT3G01710.1	1.426	0.144462	0.317083	0.841551	0.823	0.0757115	0.195891	0.874294
AT5G10180.1	1.716	0.484792	0.486835	0.549349	1.589	0.261491	0.372751	0.698528
AT3G01710.2	1.479	0.149769	0.328911	0.84168	0.855	0.0786346	0.203461	0.874302
AT3G51830.1	0.395	0.0318548	0.107554	0.919355	0.415	0.0267742	0.101953	0.935484
AT5G12040.2	NA	NA	NA	NA	NA	NA	NA	NA
AT4G02200.1	1.054	0.109677	0.263746	0.863226	0.988	0.176	0.337003	0.80009
AT1G17145.1	1.195	0.136814	0.258127	0.785671	0.921	0.129744	0.246097	0.799395
AT4G02200.3	1.1	0.114548	0.275423	0.863201	1.018	0.181355	0.34725	0.800083
AT5G57815.1	1.035	0.21539	0.298918	0.688705	1.198	0.221146	0.298841	0.673087
AT2G30520.3	1.62	0.106412	0.263162	0.8689	1.877	0.197713	0.398094	0.818173
AT2G30520.2	1.004	0.059733	0.195161	0.922258	1.872	0.0922199	0.281528	0.908685
AT2G30520.1	1.104	0.30795	0.352655	0.605593	1.395	0.45695	0.458263	0.545054
AT1G08420.2	1.383	0.122365	0.266543	0.83833	1.029	0.106641	0.222356	0.827119
AT5G53800.1	0.895	0.183053	0.273067	0.717412	0.607	0.154211	0.202522	0.669265
AT1G08420.1	1.349	0.204611	0.32554	0.737435	1.006	0.140458	0.243942	0.771335
AT4G26965.2	2.086	0.419161	0.501267	0.626627	2.134	0.454816	0.486176	0.569709
AT4G26965.1	2.136	0.466607	0.582513	0.644702	2.151	0.406643	0.58818	0.703577
AT3G05880.1	1.198	0.4834	0.383791	0.449887	1.122	0.45912	0.405072	0.496414
AT5G48630.1	0.706	0.181929	0.266561	0.703489	0.578	0.121786	0.197588	0.747256
AT2G34585.1	1.294	0.140989	0.254387	0.774565	1.512	0.192033	0.311101	0.744422
AT5G48230.1	0.828	0.0594573	0.161986	0.889443	0.87	0.0410352	0.141713	0.928197
AT4G24330.1	0.736	0.109382	0.20588	0.795261	0.574	0.0924	0.185306	0.816729
AT3G12955.1	3.112	0.277222	0.698915	0.876664	2.752	0.453389	0.670195	0.709564
AT4G03415.2	1.615	0.31145	0.381126	0.627927	2.004	0.32044	0.450789	0.694496
AT2G30530.1	1.403	0.189964	0.352192	0.797372	1.356	0.193735	0.309272	0.73957
AT4G03415.1	1.611	0.272112	0.370012	0.676089	1.973	0.316264	0.425484	0.675758
AT5G02290.2	0.82	0.0467685	0.162892	0.931504	0.822	0.0485278	0.167888	0.929376
AT3G09770.1	1.091	0.117102	0.232873	0.815314	1.235	0.088	0.20845	0.857895
AT1G50300.1	0.7	0.134962	0.234076	0.774806	0.722	0.137377	0.212393	0.719339
AT3G12600.2	0.822	0.184554	0.228922	0.637786	0.595	0.095375	0.170366	0.779312
AT3G12600.1	1.311	0.227987	0.279598	0.626962	1.164	0.197171	0.291688	0.715505
AT4G24470.2	0.505	0.107623	0.206802	0.786885	1.097	0.0411967	0.170257	0.946658
AT4G24470.3	1.208	0.116534	0.249831	0.8275	1.098	0.143583	0.282634	0.811305
AT4G24470.1	1.162	0.172803	0.283863	0.740192	1.048	0.205115	0.312465	0.72389
AT5G01460.1	1.75	0.295234	0.445033	0.721841	1.964	0.360818	0.579863	0.74946
AT5G11680.1	1.25	0.289255	0.375584	0.662546	1.103	0.204594	0.308212	0.723915
AT1G17980.2	2.19	0.300967	0.49582	0.754835	2.247	0.332734	0.518432	0.73661
AT5G17630.1	1.35	0.179325	0.314815	0.774842	1.395	0.194182	0.301953	0.732316
AT1G69060.1	1.115	0.166458	0.312048	0.797023	1.37	0.141505	0.277763	0.804325
AT3G15660.1	1.96	0.306857	0.420774	0.681097	1.738	0.3565	0.433068	0.631341
AT2G48160.1	1.172	0.11358	0.231651	0.816265	0.952	0.0937227	0.187714	0.80915
AT1G53210.1	1.16	0.179625	0.291551	0.748307	0.943	0.162488	0.243592	0.714329
AT3G15660.2	1.967	0.359983	0.442589	0.631622	1.765	0.417121	0.465376	0.595298
AT3G02060.1	0.392	0.049	0.129642	0.875	0.679	0.131792	0.240219	0.788953
AT3G01320.2	0.458	0.0361579	0.123503	0.921053	0	0	0	NA
AT1G16410.1	0.877	0.258886	0.305321	0.625418	2.091	0.272514	0.467782	0.757002
AT1G16410.2	0.841	0.238143	0.286665	0.634275	1.961	0.252486	0.437132	0.760038
AT5G14430.1	0.885	0.103561	0.203183	0.801834	1.11	0.110947	0.262796	0.856498
AT5G14430.2	0.886	0.103579	0.20325	0.801865	1.113	0.111211	0.263454	0.856524
AT5G59880.2	1.703	0.281643	0.35304	0.631644	1.366	0.27544	0.339183	0.637395
AT1G79080.1	0.807	0.1076	0.206197	0.799554	0.662	0.0541	0.153091	0.897974
AT4G33480.1	0.715	0.0754286	0.191082	0.87636	0.96	0.0695455	0.174995	0.8723
AT3G47370.2	1.594	0.22269	0.408467	0.793621	1.331	0.189024	0.341866	0.788413
AT1G16470.2	0.669	0.0186	0.0993169	0.968351	0.878	0.0256214	0.126094	0.963561
AT5G64880.1	1.208	0.17995	0.316002	0.773701	0.948	0.1055	0.240147	0.850201
AT1G16470.1	0.641	0.123519	0.219119	0.774295	0.967	0.126051	0.246726	0.811398
AT3G52720.2	1.26	0.326955	0.371598	0.606947	1.419	0.587932	0.489437	0.471
AT5G50210.1	1.441	0.209978	0.369644	0.777755	0.891	0.185833	0.293131	0.737761
AT1G29890.1	1.46	0.14588	0.313018	0.832864	1.219	0.116826	0.250521	0.835369
AT1G78210.1	0.454	0.0403556	0.129201	0.911111	0.699	0.103733	0.197467	0.788832
AT3G14980.1	1.998	0.34545	0.480199	0.687045	1.983	0.297258	0.449624	0.719439
AT2G47910.1	NA	NA	NA	NA	NA	NA	NA	NA
AT2G47910.2	1.199	0.189338	0.283587	0.719095	1.206	0.159083	0.258104	0.744582
AT1G42990.1	NA	NA	NA	NA	NA	NA	NA	NA
AT5G48460.1	1.265	0.142808	0.291255	0.821635	1.284	0.179327	0.327835	0.789843
AT1G04300.3	0.989	0.151148	0.280328	0.797842	1.037	0.114886	0.23429	0.824188
AT1G04300.2	1.129	0.162971	0.287544	0.782053	1.254	0.137418	0.263277	0.805125
AT3G16370.1	1.011	0.217969	0.287972	0.673119	1.082	0.231071	0.298721	0.663289
AT1G54090.1	0.623	0.0853168	0.182604	0.83038	0.848	0.134317	0.247053	0.791942
AT5G48180.1	1.005	0.225786	0.310258	0.688498	0.546	0.126214	0.168218	0.677397
AT5G64220.1	0.523	0.0227391	0.106656	0.956522	0	0	0	NA
AT2G40430.2	1.008	0.160436	0.303597	0.804465	0.796	0.190103	0.269691	0.702759
AT2G40430.3	0.99	0.139568	0.284421	0.826202	0.783	0.167386	0.257441	0.733861
AT2G40430.1	0.995	0.158487	0.300136	0.804683	0.793	0.190436	0.26917	0.701253
AT2G16405.1	1.744	0.28657	0.468077	0.755169	1.861	0.326279	0.432399	0.665962
AT5G42100.2	0.799	0.0994651	0.212419	0.83734	0.921	0.160767	0.29697	0.796174
AT5G42100.1	0.692	0.0909032	0.201028	0.843884	0.927	0.169226	0.300162	0.783934
AT3G16310.1	1.126	0.103593	0.241962	0.856757	0.627	0.0559186	0.149479	0.88219
AT1G07720.1	1.256	0.399467	0.421602	0.575556	1.008	0.199067	0.278497	0.679772
AT5G58470.2	1.333	0.3793	0.453643	0.63133	1.134	0.313633	0.404165	0.659592
AT5G63670.1	1.316	0.366278	0.457366	0.641665	0.965	0.185722	0.271569	0.70793
AT3G54640.1	1.138	0.0774917	0.211881	0.891349	1.206	0.074075	0.228014	0.913028
AT5G63670.2	1.422	0.13518	0.349016	0.880216	0.99	0.0651	0.188749	0.902826
AT5G54250.1	1.505	0.25034	0.401434	0.745581	1.29	0.195191	0.332466	0.754115
AT5G54250.2	1.535	0.255447	0.409424	0.74539	1.315	0.199106	0.338884	0.753875
AT5G54250.3	1.534	0.188438	0.36888	0.811891	1.308	0.150062	0.301625	0.808329
AT2G40410.1	0.583	0.107346	0.181111	0.748546	0.645	0.0457692	0.144947	0.917388
AT2G40410.2	0.575	0.0840227	0.170096	0.813331	0.638	0.0508182	0.154404	0.910819
AT3G58970.1	1.295	0.274444	0.378607	0.688947	1.457	0.277162	0.348393	0.641239
AT5G05060.1	1.141	0.14613	0.290003	0.816411	1.385	0.227696	0.33537	0.700355
AT2G38310.1	1.454	0.337741	0.380702	0.603923	2.4	0.527361	0.607057	0.613955
AT3G55630.3	0.946	0.123649	0.228801	0.791102	0.602	0.108912	0.197239	0.779481
AT1G58180.1	1.363	0.250305	0.327738	0.662221	1.498	0.320734	0.408894	0.656576
AT3G55630.1	0.991	0.127545	0.240888	0.798564	0.631	0.111018	0.206283	0.788613
AT1G58180.3	1.396	0.28628	0.380898	0.673991	1.615	0.312693	0.421596	0.678312
AT1G58180.4	1.33	0.235289	0.31662	0.672754	1.479	0.310555	0.400457	0.661389
AT2G36790.1	0	0	0	NA	0.383	0.0364762	0.112427	0.904762
AT2G34430.1	0.933	0.350579	0.328976	0.525083	1.643	0.318737	0.464931	0.708832
AT3G27010.1	1.131	0.067814	0.200877	0.903831	0.96	0.0928256	0.209258	0.840377
AT1G54580.1	0.651	0.096703	0.177071	0.780318	0.783	0.118376	0.208782	0.773362
AT3G30300.1	0.724	0.032929	0.128291	0.940884	0.657	0.0290129	0.112939	0.942412
AT1G26830.1	1.397	0.261883	0.359614	0.677334	1.562	0.276333	0.36188	0.664923
AT2G47160.1	1.125	0.130273	0.270297	0.825704	1.165	0.15783	0.282056	0.772894
AT1G51140.1	1.177	0.2497	0.342954	0.681647	0.54	0.113187	0.155693	0.689206
AT2G47160.2	1.14	0.131311	0.273352	0.826626	1.179	0.158887	0.284867	0.774085
AT5G12210.2	1.569	0.207422	0.356534	0.768476	1.316	0.223531	0.361833	0.751461
AT5G55610.2	1.443	0.292693	0.400727	0.685336	1.247	0.194216	0.307372	0.737184
AT5G55610.1	1.371	0.276705	0.38122	0.688027	1.196	0.186011	0.294734	0.737621
AT5G12210.1	1.566	0.208125	0.356936	0.767957	1.307	0.221688	0.359314	0.751899
AT5G13730.1	1.178	0.1855	0.270699	0.706754	0.856	0.207577	0.23499	0.601855
AT1G20850.1	0.865	0.25512	0.317196	0.645582	0.823	0.23412	0.283701	0.634423
AT1G22160.1	1.302	0.225345	0.357597	0.744928	1.018	0.20369	0.283265	0.691319
AT2G18570.1	0.679	0.115471	0.21474	0.78727	0.69	0.0778676	0.181615	0.850983
AT1G14380.2	1.119	0.13456	0.264021	0.808611	1.026	0.0867738	0.209384	0.862567
AT1G14380.3	0.89	0.0812241	0.215363	0.884478	0.952	0.0800345	0.187896	0.845704
AT1G74970.1	1.092	0.180646	0.30404	0.765802	1.167	0.166146	0.294017	0.781089
AT1G14380.1	1.034	0.124274	0.243903	0.808686	0.953	0.0803452	0.194284	0.86304
AT1G47530.1	0.646	0.101414	0.189658	0.798837	0.887	0.188276	0.270567	0.70576
AT3G16660.1	1.262	0.201871	0.333955	0.758433	1.718	0.321565	0.537537	0.763792
AT3G62700.1	1.4	0.286529	0.388448	0.671489	0.6	0.144471	0.213716	0.714313
AT2G42910.1	1.051	0.156333	0.287969	0.794182	0.97	0.170573	0.282752	0.759067
AT4G02590.1	1.288	0.180312	0.294112	0.746689	1.036	0.167385	0.273068	0.754803
AT3G62650.2	0.475	0.050119	0.112822	0.849576	0.608	0.0662619	0.153742	0.854277
AT4G02590.3	1.394	0.0568507	0.237787	0.950514	0.564	0.0387164	0.126631	0.920264
AT5G24530.1	1.053	0.0953731	0.254521	0.887941	0.866	0.0907015	0.195781	0.834996
AT4G08555.1	1.538	0.408346	0.498385	0.63419	0.648	0.129808	0.1926	0.718735
AT3G03140.1	1.702	0.364879	0.47788	0.667986	1.762	0.33534	0.412412	0.639701
AT5G58900.1	1.814	0.136495	0.275161	0.807251	2.112	0.131454	0.328506	0.865121
AT1G23440.1	1.001	0.196709	0.304534	0.729739	1.013	0.134907	0.2511	0.794041
AT4G27720.1	1.449	0.248024	0.388317	0.738675	1.345	0.215024	0.332515	0.734515
AT2G24570.1	1.606	0.25055	0.394036	0.731705	1.201	0.241175	0.334623	0.686216
AT4G00630.2	0.828	0.109145	0.208825	0.796035	0.788	0.0692419	0.16336	0.854833
AT3G28300.1	0.797	0.100386	0.188913	0.791832	0.45	0.0931591	0.136128	0.695652
AT3G44330.1	1.236	0.0884314	0.222363	0.859771	1.372	0.178451	0.329394	0.792048
AT2G22010.1	1.061	0.10345	0.236889	0.848154	0.777	0.0664198	0.182321	0.887682
AT2G22010.2	1.111	0.0660648	0.200263	0.907193	0.813	0.0516667	0.164994	0.913754
AT4G00630.1	0.819	0.099806	0.200594	0.811357	0.775	0.0676418	0.162455	0.860397
AT4G27740.1	1.166	0.104093	0.243371	0.857015	1.078	0.12407	0.283032	0.851559
AT5G45390.1	0.868	0.102963	0.205523	0.813696	0.72	0.139815	0.216421	0.735266
AT1G15480.1	0.722	0.0812105	0.192665	0.856272	1.239	0.0824737	0.253029	0.91034
AT1G75440.1	0.588	0.0546812	0.144897	0.881235	0.52	0.0150725	0.0872382	0.971014
AT3G50970.1	1.587	0.419897	0.518616	0.631298	0.24	0.0894828	0.0876748	0.543884
AT2G38640.1	1.169	0.244985	0.342078	0.694049	1.303	0.280803	0.408189	0.712262
AT3G45260.1	0.391	0.05225	0.12064	0.855561	1.024	0.139941	0.274595	0.81367
AT4G00355.1	1.461	0.0874767	0.233554	0.875883	1.051	0.0987209	0.239749	0.865461
AT4G00355.2	1.526	0.120102	0.270377	0.839982	1.172	0.152592	0.285744	0.794964
AT4G00355.3	0.87	0.0266609	0.118752	0.953578	0.74	0.0112174	0.0811926	0.98277
AT4G00355.4	1.607	0.134323	0.290557	0.829028	1.196	0.158624	0.295473	0.793674
AT3G61060.1	0.922	0.0824571	0.208275	0.868578	1.021	0.0649238	0.20313	0.909502
AT3G45240.3	1.044	0.064242	0.181951	0.893336	1.037	0.0690064	0.184412	0.885421
AT3G45240.2	1.013	0.0638663	0.179788	0.89378	1.012	0.0590749	0.169238	0.898463
AT3G48360.1	1.405	0.463743	0.405292	0.490141	1.538	0.296114	0.475309	0.748277
AT3G26710.1	0.748	0.0863556	0.170144	0.811123	1.072	0.0477778	0.172444	0.934992
AT3G14930.2	1.017	0.230719	0.308402	0.679553	1.175	0.210193	0.361864	0.772641
AT5G40170.1	NA	NA	NA	NA	NA	NA	NA	NA
AT5G17160.1	0.696	0.04904	0.150669	0.908385	0.419	0.05866	0.145388	0.86
AT3G21140.1	1.136	0.210716	0.329036	0.73577	1.072	0.160247	0.277179	0.769579
AT1G26620.1	1.279	0.0988951	0.241273	0.86442	1.056	0.0754815	0.178704	0.850246
AT2G17350.1	1.477	0.326531	0.350577	0.578732	1.519	0.339982	0.390314	0.609294
AT1G78020.1	1.72	0.3545	0.448228	0.64979	1.511	0.31885	0.425651	0.678707
AT5G43720.1	1.479	0.1155	0.284057	0.861511	1.679	0.113284	0.291756	0.877121
AT1G50020.1	1.304	0.421073	0.424544	0.557105	1.72	0.388818	0.45236	0.617201
AT3G50210.2	1.502	0.140995	0.269183	0.797318	1.438	0.146535	0.3089	0.832268
AT3G50210.3	0.827	0.0754426	0.18241	0.865746	1.176	0.0795902	0.215075	0.885584
AT5G20680.2	1.523	0.170541	0.337841	0.809019	1.483	0.154351	0.306926	0.814943
AT3G57530.1	1.205	0.113657	0.274367	0.868539	1.226	0.109543	0.279022	0.879955
AT3G07700.3	0.925	0.113458	0.225984	0.813437	0.928	0.0827097	0.188594	0.850057
AT3G20100.1	0.874	0.1748	0.289873	0.75	0.443	0.0823	0.147159	0.783111
AT2G17340.1	1.425	0.350391	0.427961	0.633254	1.365	0.29413	0.437163	0.72145
AT3G43720.1	1.245	0.37869	0.391737	0.561489	1.428	0.422103	0.454831	0.586103
AT2G30140.1	1.279	0.20234	0.342202	0.762633	0.772	0.176447	0.242559	0.689959
AT2G30140.2	1.278	0.202298	0.342082	0.762592	0.77	0.176021	0.241932	0.689888
AT5G56750.1	1.281	0.325648	0.419274	0.663374	1.173	0.296074	0.390104	0.672998
AT4G38225.3	0.833	0.2148	0.280393	0.667536	0.415	0.0763333	0.13683	0.778923
AT4G38225.2	NA	NA	NA	NA	NA	NA	NA	NA
AT4G38225.1	0.791	0.205933	0.266011	0.662868	0.387	0.0678	0.125086	0.787414
AT3G05730.1	1.019	0.218719	0.269756	0.638462	2.205	0.481187	0.653627	0.685728
AT5G53940.1	1.155	0.358462	0.442552	0.641697	1.22	0.436	0.390168	0.497801
AT5G03730.2	1.402	0.29635	0.396528	0.678881	1.407	0.27044	0.380633	0.69782
AT5G03730.1	1.393	0.2977	0.394625	0.675037	1.419	0.27581	0.38449	0.693905
AT3G18535.1	1.806	0.355546	0.410796	0.60981	2.11	0.361915	0.515877	0.702519
AT3G02720.1	1.575	0.195571	0.344953	0.775483	1.408	0.219063	0.326959	0.71241
AT5G56740.1	0.698	0.0991064	0.193949	0.79784	0.962	0.0716383	0.197917	0.887538
AT5G49015.2	1.268	0.347273	0.395591	0.608329	1.762	0.364758	0.4665	0.656618
AT1G20620.2	1.074	0.335062	0.333929	0.550647	1.314	0.303458	0.376045	0.644909
AT2G19430.1	1.391	0.197138	0.40341	0.825849	1.888	0.30531	0.487918	0.738649
AT5G14600.1	1.52	0.202253	0.382005	0.797362	1.043	0.208823	0.320258	0.725918
AT5G02500.2	1.052	0.300981	0.300293	0.550345	1.255	0.222259	0.294649	0.66874
AT2G18510.1	1.514	0.268295	0.384308	0.7002	0.937	0.259344	0.30488	0.619815
AT1G16260.1	0.616	0.0936042	0.198584	0.833162	1.571	0.156083	0.34003	0.83825
AT5G09860.1	0.752	0.094642	0.202645	0.826455	1.001	0.0911111	0.228147	0.871364
AT1G20620.1	1.065	0.333729	0.331272	0.548844	1.292	0.297729	0.369495	0.645568
AT3G25030.1	1.171	0.108961	0.248905	0.852784	0.919	0.102698	0.215857	0.832013
AT1G18300.1	0.85	0.05525	0.168481	0.91241	1.588	0.0822125	0.265074	0.917871
AT4G08980.1	0.673	0.08414	0.195546	0.854989	0.785	0.0815	0.175289	0.832005
AT4G08980.2	0.453	0.0241893	0.101846	0.946602	0.639	0.0437427	0.125392	0.898482
AT3G08000.1	0.956	0.06296	0.198784	0.915705	0.517	0.06204	0.168005	0.88
AT2G18890.1	0.692	0.0892267	0.200971	0.845029	0.831	0.101907	0.215443	0.820296
AT1G50430.1	1.287	0.26802	0.345719	0.659153	1.185	0.303412	0.385602	0.658334
AT1G50430.2	1.325	0.28298	0.357931	0.650852	1.205	0.3148	0.393615	0.651436
AT5G07740.1	1.173	0.164761	0.274736	0.753864	0.859	0.116315	0.205452	0.769901
AT1G12900.2	1.191	0.299349	0.33859	0.60801	1.422	0.309611	0.402581	0.666714
AT1G12900.3	1.181	0.215096	0.299617	0.691677	1.389	0.229777	0.346749	0.721686
AT1G12900.1	1.033	0.120545	0.256075	0.837793	1.397	0.136894	0.324069	0.864639
AT5G64330.2	1.216	0.108319	0.231752	0.831801	1.343	0.088	0.241217	0.88976
AT1G12900.4	1.184	0.170924	0.305624	0.786192	1.46	0.168014	0.335197	0.818445
AT5G65760.1	0.544	0.136	0.235559	0.75	0.534	0.0801	0.190676	0.85
AT1G50450.1	NA	NA	NA	NA	NA	NA	NA	NA
AT1G19600.1	1.163	0.211	0.320195	0.725801	1.137	0.251305	0.291525	0.606486
AT3G13690.1	1.451	0.138383	0.282444	0.822581	1.646	0.146139	0.334565	0.851338
AT1G71210.1	NA	NA	NA	NA	NA	NA	NA	NA
AT3G13320.1	1.332	0.162775	0.308902	0.800039	1.767	0.181	0.37649	0.827921
AT5G48570.1	1.15	0.12193	0.234201	0.805336	1.368	0.13586	0.291165	0.829278
AT3G15220.1	1.82	0.287391	0.438956	0.727439	1.461	0.282783	0.386686	0.682367
AT4G37930.1	1.581	0.144583	0.276212	0.792346	0.947	0.160621	0.257383	0.748782
AT2G31740.1	1.145	0.222415	0.31461	0.693668	1.237	0.250488	0.348884	0.683103
AT1G13360.1	1.175	0.26249	0.348533	0.67242	1.292	0.241078	0.371744	0.731928
AT1G13360.3	1.345	0.179467	0.31133	0.772279	1.489	0.172356	0.334646	0.809097
AT1G13360.2	1.373	0.183167	0.317718	0.772254	1.509	0.175022	0.33937	0.808757
AT3G14660.1	0.641	0.0288519	0.108507	0.939868	0.68	0.0322685	0.121222	0.940015
AT1G09310.1	1.057	0.50875	0.341739	0.380631	1.086	0.47095	0.337257	0.400796
AT5G38720.1	1.403	0.345711	0.415294	0.629127	1.43	0.409556	0.436395	0.580332
AT1G14140.1	0.862	0.364692	0.331538	0.48951	1.037	0.328692	0.362715	0.59425
AT4G29410.1	1.264	0.313333	0.285579	0.494337	1.166	0.299619	0.297103	0.535041
AT4G12340.1	0.65	0.103102	0.170351	0.756993	0.545	0.100714	0.146365	0.708872
AT5G19150.1	0.444	0.0317143	0.114347	0.928571	0.409	0.04725	0.125917	0.8799
AT5G19150.2	0.433	0.0393636	0.124479	0.909091	0.402	0.0569545	0.137454	0.856816
AT5G50440.1	1.144	0.19895	0.316681	0.742416	0.943	0.20135	0.294269	0.712304
AT3G22260.2	0.962	0.106209	0.22757	0.83214	0.908	0.118463	0.23579	0.812831
AT3G22260.3	0.937	0.106616	0.234084	0.838134	0.879	0.127209	0.250691	0.812986
AT3G22260.1	0.962	0.106187	0.227565	0.832194	0.913	0.119425	0.237181	0.812309
AT3G15070.1	1.123	0.0463611	0.182308	0.943562	0.816	0.0554583	0.188996	0.926089
AT1G66150.1	0.632	0.0361522	0.139715	0.940874	0.423	0.0183913	0.0862629	0.956522
AT1G03090.2	1.075	0.22985	0.288083	0.635164	1.193	0.1979	0.407035	0.823825
AT3G27460.1	1.114	0.0516638	0.189333	0.93626	0.977	0.0398103	0.163983	0.949892
AT1G03090.1	1.091	0.2343	0.292167	0.632501	1.195	0.1992	0.407385	0.822515
AT5G50960.1	1.184	0.21561	0.317448	0.707638	0.969	0.163508	0.272934	0.762868
AT5G26000.1	1.357	0.472903	0.444457	0.52435	1.669	0.537355	0.517461	0.532306
AT5G26000.2	1.357	0.473355	0.444152	0.52363	1.665	0.537323	0.516793	0.531754
AT3G04930.2	1.189	0.150293	0.293685	0.812774	0.989	0.143103	0.241479	0.760794
AT4G25890.1	1.551	0.416517	0.459491	0.5939	2.02	0.413638	0.50345	0.621823
AT3G04930.1	1.098	0.142379	0.271382	0.804908	0.904	0.133948	0.222636	0.755627
AT3G22480.2	0.98	0.2528	0.280004	0.588944	0.508	0.07975	0.163142	0.820784
AT3G22480.1	1.235	0.215449	0.275478	0.643441	1.267	0.185536	0.303251	0.751273
AT4G02770.1	0.958	0.196383	0.293413	0.721071	1.243	0.233383	0.354712	0.729169
AT1G70670.1	0.724	0.057464	0.159778	0.890875	0.763	0.07216	0.179534	0.867049
AT4G33460.1	0.865	0.178818	0.273461	0.722143	1.002	0.132894	0.264753	0.81315
AT1G30970.2	1.401	0.189958	0.316145	0.749264	1.462	0.141937	0.280811	0.809198
AT1G30970.1	1.417	0.19856	0.353508	0.776312	1.484	0.187964	0.325572	0.76696
AT5G05200.1	1.285	0.299233	0.411547	0.690888	1.215	0.2869	0.385572	0.680504
AT4G25870.1	1.818	0.400935	0.515027	0.659374	1.68	0.453215	0.508924	0.602719
AT4G14600.1	0.959	0.0884286	0.224255	0.876131	1.819	0.140702	0.351017	0.873131
AT2G16900.1	0.745	0.0640562	0.167941	0.875981	1.112	0.0667809	0.182408	0.886196
AT2G16900.3	1.51	0.136609	0.298363	0.841045	1.309	0.108388	0.251177	0.854778
AT2G16900.2	1.412	0.277434	0.374592	0.680288	1.23	0.226582	0.323603	0.702735
AT1G73180.2	1.209	0.145958	0.273559	0.794775	0.958	0.0879167	0.208311	0.85897
AT1G04780.1	0.859	0.117136	0.202324	0.766943	0.74	0.0991053	0.191752	0.808923
AT2G29540.1	1.367	0.381152	0.415551	0.591041	1.642	0.40637	0.477075	0.620994
AT1G11650.2	1.141	0.141175	0.270713	0.803551	1.193	0.132193	0.247779	0.791707
AT5G35450.1	0.942	0.20058	0.32945	0.75118	1.045	0.18632	0.293413	0.733091
AT1G75630.2	1.058	0.0918356	0.234476	0.877362	1.208	0.0819589	0.238033	0.904751
AT1G75630.1	0.881	0.133912	0.258732	0.808652	1.047	0.151029	0.282135	0.800246
AT1G10450.1	2.068	0.222245	0.401546	0.777452	1.779	0.209447	0.388434	0.791288
AT5G20290.1	1.016	0.231061	0.309265	0.676856	0.949	0.263909	0.35351	0.675164
AT3G45850.2	0.937	0.147269	0.242114	0.746682	0.837	0.110923	0.232653	0.831526
AT1G21400.1	0	0	0	NA	0.368	0.032	0.091241	0.897189
AT2G05250.1	0.859	0.113657	0.236047	0.826275	1.011	0.130506	0.238424	0.783807
AT4G14030.1	1.129	0.178795	0.29248	0.749913	0.83	0.132795	0.205188	0.723753
AT1G10390.2	1.325	0.165214	0.287084	0.767733	1.08	0.128464	0.24097	0.795374
AT3G52105.1	1.314	0.225841	0.369114	0.754455	1.403	0.294341	0.4291	0.713095
AT1G64355.2	0.907	0.220906	0.293563	0.667417	1.353	0.132281	0.294765	0.838169
AT1G64355.1	0.805	0.160475	0.246566	0.725872	1.163	0.1033	0.239185	0.847568
AT3G09920.1	0.75	0.0681236	0.173635	0.874903	0.83	0.0661573	0.164765	0.869596
AT2G01670.1	0.995	0.150147	0.241335	0.736281	0.795	0.1015	0.191296	0.799847
AT3G56310.1	1.256	0.395897	0.40705	0.564225	1.161	0.305897	0.321382	0.571101
AT3G56310.2	1.246	0.48531	0.411461	0.477305	0.934	0.30731	0.281897	0.513016
AT2G32180.1	1.282	0.251422	0.324092	0.658386	1.182	0.309311	0.354195	0.610788
AT3G26060.1	0.591	0.0461053	0.132713	0.900324	0.842	0.0925526	0.193736	0.824604
AT4G36210.1	1.266	0.158193	0.279201	0.780101	1.087	0.160553	0.250155	0.73437
AT1G78040.2	0.762	0.144727	0.254781	0.779047	0.753	0.130606	0.257531	0.810771
AT4G36210.3	0.58	0.09625	0.177492	0.795	0.861	0.167975	0.220663	0.664492
AT5G59440.1	0.938	0.165271	0.256378	0.72784	0.897	0.141586	0.259958	0.792797
AT3G07640.1	1.033	0.24004	0.366647	0.725412	1.022	0.281	0.352079	0.649372
AT1G30880.1	1.085	0.234104	0.338304	0.708951	1.21	0.265729	0.331759	0.648884
AT1G80670.1	0.993	0.10557	0.223726	0.826346	0.8	0.0718608	0.182718	0.871195
AT4G13640.2	1.334	0.156013	0.288778	0.790136	1.297	0.146744	0.27452	0.789818
AT4G13640.1	1.265	0.14926	0.275089	0.78881	1.243	0.142506	0.264376	0.787082
AT5G13240.1	1.757	0.273984	0.422299	0.721604	1.163	0.215339	0.356312	0.755682
AT4G38710.2	0.753	0.236875	0.231246	0.540117	0.716	0.225396	0.226375	0.554131
AT3G07660.1	1.657	0.207333	0.360212	0.771548	1.012	0.172111	0.279109	0.750631
AT4G31130.1	1.376	0.250917	0.374644	0.719702	1.542	0.287159	0.441556	0.731627
AT2G30390.1	0.955	0.166089	0.24606	0.715217	0.722	0.132929	0.229729	0.775318
AT2G29310.2	0.791	0.230538	0.270432	0.607069	1.399	0.339231	0.480419	0.692029
AT2G30390.2	0.98	0.146369	0.241517	0.755547	0.738	0.122415	0.224428	0.794397
AT3G60590.4	1.052	0.162731	0.27488	0.762084	1.031	0.179378	0.275803	0.728519
AT3G15360.1	1.206	0.352286	0.35999	0.559708	1.385	0.416755	0.415871	0.552728
AT1G17340.1	1.474	0.124043	0.280346	0.846871	1.214	0.139104	0.283811	0.819405
AT2G27770.1	1.202	0.239115	0.330797	0.68553	1.517	0.243131	0.371166	0.724513
AT5G54290.1	1.518	0.247	0.354911	0.691309	1.129	0.3338	0.372338	0.602184
AT5G54290.2	1.654	0.229645	0.393202	0.761959	1.378	0.284419	0.368387	0.657864
AT2G21470.3	1.146	0.157608	0.258271	0.739537	1.335	0.121526	0.248195	0.806588
AT2G21470.2	0.939	0.166434	0.264064	0.730903	1.417	0.138658	0.269928	0.783725
AT2G21470.1	0.875	0.154855	0.245776	0.731038	1.316	0.128921	0.250875	0.783662
AT5G49160.1	1.314	0.304296	0.346604	0.593188	1.328	0.339333	0.440688	0.664015
AT4G28490.1	1.37	0.26084	0.42691	0.754044	1.642	0.34304	0.462977	0.675215
AT2G02560.2	1.337	0.183564	0.309032	0.756741	1.009	0.135106	0.262446	0.805911
AT1G72680.1	0.806	0.0826719	0.190672	0.85367	0.71	0.0931406	0.175335	0.797986
AT2G02560.1	1.339	0.147989	0.279418	0.794667	1.172	0.146628	0.283547	0.804217
AT2G35630.1	1.493	0.223049	0.35126	0.740645	1.278	0.257902	0.348699	0.6832
AT5G23860.1	1.505	0.285976	0.326993	0.582313	1.342	0.232643	0.370197	0.740381
AT3G46940.1	1.163	0.270093	0.322556	0.616754	0.971	0.155333	0.29029	0.798473
AT5G41700.5	1.328	0.0497716	0.182501	0.933321	1.464	0.0349137	0.170934	0.962542
AT5G41700.1	1.223	0.268365	0.36118	0.680868	1.342	0.287524	0.384239	0.678815
AT3G44100.1	0.544	0.0344583	0.117836	0.926995	0.734	0.0789167	0.194734	0.872096
AT5G41700.3	1.24	0.374676	0.40756	0.590964	1.349	0.391919	0.415286	0.576985
AT1G24147.1	1.227	0.270439	0.380875	0.697352	2.479	0.232634	0.564079	0.867503
AT2G37230.1	0.995	0.15527	0.258674	0.75257	0.758	0.122432	0.239058	0.810918
AT4G21650.1	1.453	0.161062	0.381431	0.855719	1.035	0.142437	0.325425	0.851333
AT3G16060.1	2.014	0.441695	0.451568	0.550564	1.764	0.401671	0.386941	0.523317
AT4G24930.1	1.227	0.0739744	0.250646	0.926401	1.163	0.0927051	0.277279	0.908951
AT1G20050.1	1.472	0.220286	0.321435	0.703402	1.554	0.218129	0.35536	0.749808
AT1G06470.2	1.906	0.168173	0.320875	0.788617	1.258	0.155177	0.302761	0.811173
AT3G10220.1	0.983	0.193167	0.277642	0.70621	1.104	0.19597	0.294021	0.722111
AT3G59970.1	0.896	0.262614	0.295934	0.603692	0.79	0.193318	0.267608	0.692207
AT1G80230.1	0.98	0.222755	0.301123	0.683509	0.927	0.197906	0.279373	0.700112
AT3G59970.3	0.963	0.222754	0.288276	0.662303	0.791	0.172082	0.249697	0.710529
AT1G55000.2	2.16	0.254443	0.392824	0.710786	1.508	0.23119	0.323073	0.688026
AT1G55000.3	2.126	0.249658	0.386138	0.711437	1.492	0.229253	0.31991	0.687425
AT1G55000.1	2.145	0.2512	0.389372	0.712651	1.532	0.23505	0.329056	0.688452
AT2G30695.1	1.538	0.47222	0.457011	0.537518	1.42	0.360847	0.429538	0.627778
AT2G30695.2	1.694	0.152157	0.336573	0.835725	1.532	0.156887	0.339582	0.837675
AT2G20950.4	1.188	0.47778	0.392404	0.46671	1.311	0.375463	0.448131	0.632045
AT1G62045.1	1.576	0.431848	0.503808	0.620301	1.422	0.30387	0.402943	0.673577
AT2G20880.1	1.239	0.142707	0.290514	0.811193	0.62	0.11	0.17217	0.739181
AT2G05620.1	1.196	0.224358	0.32858	0.714542	1.207	0.206202	0.29643	0.702572
AT1G22790.2	1.322	0.334037	0.397417	0.628732	1.477	0.309528	0.37573	0.635697
AT5G27470.1	1.079	0.219842	0.296217	0.677476	1.219	0.143895	0.259315	0.774525
AT3G58470.1	1.315	0.2671	0.35471	0.663301	0.687	0.135733	0.219662	0.747102
AT1G55020.1	0.996	0.242603	0.327107	0.670916	1.079	0.238492	0.299345	0.646501
AT1G56300.1	1.312	0.147858	0.263303	0.780026	1.237	0.147759	0.292771	0.813613
AT1G21920.1	0.838	0.133398	0.247329	0.79405	0.966	0.108016	0.231006	0.833001
AT4G09000.2	1.612	0.133207	0.265966	0.807104	1.727	0.221694	0.369734	0.759687
AT4G09000.1	1.597	0.137631	0.267733	0.800263	1.694	0.220144	0.364306	0.756907
AT5G60800.2	1.476	0.206609	0.341201	0.731907	1.101	0.154457	0.279322	0.783181
AT5G60800.1	1.507	0.208682	0.352137	0.739896	1.126	0.161227	0.288303	0.779148
AT4G25130.1	1.421	0.140158	0.28864	0.815325	1.172	0.136342	0.251761	0.783739
AT2G47470.4	1.161	0.26938	0.349696	0.666127	1.307	0.29468	0.363572	0.644621
AT2G47470.3	1.161	0.26754	0.348429	0.667526	1.309	0.29218	0.36227	0.646658
AT2G47470.2	1.141	0.2628	0.342402	0.667714	1.281	0.2845	0.353661	0.647726
AT2G47470.1	1.137	0.26122	0.340709	0.668174	1.292	0.28906	0.358003	0.646201
AT5G04990.1	1.294	0.114402	0.24503	0.833081	0.912	0.0844368	0.177707	0.828481
AT3G46430.1	1.387	0.281982	0.358533	0.648741	1.399	0.272679	0.352106	0.655683
AT3G05230.2	1.632	0.212	0.371157	0.77213	1.729	0.28814	0.450946	0.738098
AT3G54790.1	1.005	0.0507172	0.167314	0.917186	0.904	0.0379192	0.152401	0.943887
AT5G23290.1	1.408	0.227212	0.32534	0.682881	0.811	0.157788	0.234066	0.718136
AT3G47860.1	1.07	0.228	0.316784	0.689725	0.567	0.181808	0.20448	0.59912
AT2G26970.2	NA	NA	NA	NA	NA	NA	NA	NA
AT2G26970.1	NA	NA	NA	NA	NA	NA	NA	NA
AT5G64560.1	1.273	0.274662	0.363878	0.67299	1.151	0.234419	0.329321	0.692358
AT5G64560.2	1.316	0.290583	0.378898	0.66465	1.192	0.285958	0.372525	0.66558
AT4G20960.1	0.928	0.200542	0.303758	0.725358	0.781	0.114424	0.217869	0.80312
AT2G39770.1	1.216	0.270138	0.334834	0.641614	1.374	0.270943	0.366806	0.680387
AT4G12460.1	1.546	0.1335	0.312026	0.856325	0.944	0.0968182	0.227831	0.860355
AT4G12460.2	1.935	0.221237	0.355286	0.732262	1.67	0.199098	0.320576	0.743752
AT2G39770.2	1.215	0.25329	0.330495	0.66373	1.372	0.253355	0.3607	0.700923
AT4G32850.8	0.96	0.131481	0.237474	0.78321	1.013	0.101574	0.203983	0.806205
AT1G72690.1	1.933	0.392294	0.521999	0.6721	1.264	0.345118	0.327095	0.525293
AT2G14120.3	1.137	0.106053	0.242833	0.853035	0.622	0.0419474	0.124124	0.906822
AT2G27040.1	1.097	0.225521	0.366578	0.750743	1.412	0.201197	0.336902	0.753711
AT3G58780.3	6.922	0.415465	1.10051	0.881331	5.549	0.498747	1.07539	0.834085
AT4G28706.2	1.139	0.212667	0.334546	0.738351	1.396	0.229479	0.350299	0.718832
AT5G63940.1	1.563	0.304673	0.45177	0.718085	1.775	0.349092	0.463501	0.670796
AT4G19490.1	1.532	0.156198	0.32604	0.829589	1.478	0.178917	0.354642	0.817303
AT4G19490.2	1.571	0.160719	0.334577	0.828862	1.506	0.182992	0.361861	0.816646
AT5G01260.2	0.375	0.025	0.0935414	0.933333	0.469	0.0156333	0.0841881	0.966667
AT5G01260.1	0.422	0.0281333	0.105265	0.933333	0.516	0.0172	0.0926248	0.966667
AT3G12030.1	1.657	0.491273	0.668293	0.67408	1.85	0.380636	0.654581	0.764618
AT5G61330.1	1.256	0.434871	0.406388	0.524047	1.418	0.389177	0.428542	0.596312
AT1G12650.2	0.818	0.127977	0.235464	0.792621	1.001	0.208295	0.274248	0.664889
AT1G12650.3	0.815	0.0983125	0.200037	0.81546	0.99	0.15375	0.246303	0.732127
AT1G12650.1	0.815	0.0573846	0.162431	0.891753	0.995	0.0762051	0.207834	0.889378
AT5G19910.2	1.521	0.102373	0.30439	0.90827	1.428	0.111157	0.283445	0.8753
AT1G12650.4	0.81	0.097625	0.198918	0.815801	0.978	0.151531	0.24332	0.733173
AT3G12050.2	1.342	0.239858	0.36555	0.726769	1.299	0.232462	0.364957	0.741306
AT5G11640.1	NA	NA	NA	NA	NA	NA	NA	NA
AT3G23820.1	1.368	0.393298	0.375391	0.529245	1.199	0.341614	0.33928	0.550479
AT3G12050.1	1.317	0.23334	0.358235	0.729435	1.285	0.229179	0.360621	0.742143
AT3G08890.1	0.988	0.234837	0.303689	0.662222	0.908	0.225302	0.315656	0.692797
AT3G08890.2	1.06	0.254405	0.32702	0.659253	0.942	0.238452	0.328768	0.686325
AT5G02530.2	1.361	0.370828	0.407138	0.591361	1.522	0.332259	0.427783	0.661644
AT3G11910.2	0.695	0.0664444	0.163456	0.867905	0.964	0.0810278	0.186815	0.852366
AT2G33550.1	1.257	0.250308	0.349455	0.693832	1.719	0.292808	0.408752	0.686867
AT5G02530.1	1.355	0.424367	0.409444	0.532084	1.507	0.382224	0.432703	0.605535
AT4G09340.1	0.517	0.064625	0.170982	0.875	1.374	0.217125	0.378315	0.763061
AT1G04280.1	0.739	0.055209	0.146456	0.877583	0.783	0.0676119	0.188637	0.892023
AT5G10750.1	1.264	0.255805	0.381789	0.722376	1.567	0.292078	0.449795	0.729355
AT2G34730.1	0.421	0.0374222	0.11981	0.911111	0.707	0.0765778	0.170029	0.841336
AT4G20440.1	1.524	0.356261	0.398693	0.599709	1.58	0.288928	0.415441	0.701981
AT2G23080.1	1.129	0.187391	0.282344	0.718814	1.248	0.194781	0.318009	0.751572
AT2G23080.2	1.194	0.195172	0.296898	0.723212	1.366	0.212938	0.347991	0.751997
AT1G01910.5	1.532	0.233744	0.337049	0.700148	1.557	0.193952	0.33076	0.758272
AT1G01910.4	1.603	0.368526	0.4427	0.626438	1.634	0.379395	0.446908	0.618391
AT5G10770.1	0.538	0.0358667	0.134201	0.933333	0.978	0.04715	0.180977	0.939714
AT1G54390.6	1.185	0.150912	0.268742	0.777979	1.069	0.151612	0.262508	0.769793
AT1G01910.1	1.549	0.355263	0.427665	0.627341	1.599	0.366237	0.437552	0.624509
AT1G01910.3	1.643	0.371053	0.452875	0.633445	1.726	0.402895	0.472034	0.616095
AT1G01910.2	1.544	0.346474	0.425247	0.635868	1.599	0.359789	0.437778	0.632449
AT2G27290.1	0.852	0.318	0.316673	0.547607	1.049	0.401833	0.424377	0.567157
AT4G01280.1	0.601	0.0455814	0.146299	0.917513	0.421	0.0327674	0.102418	0.914322
AT4G01280.2	0.612	0.0831667	0.191603	0.852204	0.429	0.0595833	0.133956	0.847378
AT5G20170.1	1.396	0.261931	0.388138	0.710392	1.079	0.243172	0.355713	0.710818
AT5G52110.1	1.069	0.2055	0.339575	0.754826	1.222	0.155333	0.287896	0.785608
AT4G33350.2	0.739	0.177286	0.268366	0.725337	0.593	0.0582143	0.146785	0.877082
AT5G52110.2	1.126	0.216533	0.357749	0.754762	1.139	0.144167	0.268481	0.786998
AT3G13810.1	0.67	0.0370867	0.127379	0.924416	0.987	0.0405491	0.14011	0.9249
AT1G06890.1	1.308	0.183847	0.301935	0.752165	1.154	0.126038	0.250388	0.811366
AT5G27410.2	1.58	0.347385	0.516063	0.716291	1.323	0.282923	0.456265	0.745765
AT3G13810.2	0.67	0.0328136	0.124847	0.938717	0.376	0.0127458	0.0680438	0.966102
AT4G31300.1	1.259	0.203644	0.310775	0.721607	1.415	0.184644	0.300184	0.748675
AT3G16570.1	1.421	0.478393	0.422246	0.493721	1.488	0.389464	0.481955	0.646686
AT1G61240.3	1.399	0.129966	0.287222	0.843294	1.082	0.0880776	0.221076	0.874536
AT5G64280.1	1.782	0.2545	0.439193	0.762921	1.513	0.320382	0.426759	0.667949
AT1G61240.1	1.382	0.145094	0.295529	0.82035	1.065	0.110453	0.232941	0.829478
AT1G06890.2	1.276	0.16277	0.273238	0.748514	0.633	0.0550164	0.149149	0.891157
AT1G61240.4	1.425	0.0884023	0.247036	0.895331	1.1	0.0597874	0.18845	0.916223
AT2G20190.1	1.077	0.143705	0.280628	0.808941	0.944	0.173152	0.297282	0.771606
AT3G61210.1	1.213	0.401744	0.4184	0.568518	1.35	0.41459	0.416965	0.553389
AT5G27990.1	1.418	0.210075	0.324273	0.715615	1.908	0.312638	0.448207	0.683561
AT3G04080.1	1.421	0.178418	0.328384	0.78834	1.037	0.160053	0.274749	0.768448
AT2G41710.1	1.534	0.154984	0.293139	0.788429	1.127	0.160371	0.260444	0.742067
AT2G41710.2	1.537	0.156	0.293962	0.787204	1.13	0.161984	0.261795	0.740232
AT1G33390.1	1.562	0.38207	0.446594	0.618679	1.331	0.392791	0.445899	0.606141
AT2G35020.1	0.65	0.0500426	0.144476	0.898936	0.885	0.111596	0.202204	0.776358
AT3G43520.1	1.093	0.260636	0.343006	0.672829	1.118	0.316955	0.320778	0.552208
AT5G65940.1	1.38	0.433684	0.427958	0.546583	1.193	0.292737	0.357865	0.639187
AT1G12750.2	1.941	0.251445	0.406131	0.746543	2.213	0.232682	0.414942	0.779633
AT5G38560.1	1.651	0.168529	0.297765	0.774623	1.577	0.167599	0.307601	0.7874
AT5G05660.1	NA	NA	NA	NA	NA	NA	NA	NA
AT1G26460.1	1.503	0.420108	0.431481	0.562169	1.428	0.464246	0.467295	0.55636
AT3G02450.1	1.266	0.151838	0.260456	0.763119	0.969	0.123717	0.226393	0.783229
AT1G77510.1	0.904	0.0623273	0.187492	0.907097	0.863	0.0879636	0.205112	0.856131
AT5G54770.1	1.496	0.488059	0.404481	0.460095	1.495	0.522588	0.424509	0.456405
AT2G45680.1	1.072	0.24558	0.35573	0.708395	1.115	0.182	0.287055	0.733055
AT1G27150.1	0.814	0.133141	0.229134	0.763654	1.135	0.154026	0.253938	0.747901
AT1G15030.1	1.34	0.240289	0.358619	0.717703	1.58	0.27257	0.401246	0.714711
AT4G18370.1	0.902	0.133571	0.22769	0.768865	0.83	0.172518	0.244806	0.701685
AT4G19110.1	1.249	0.218165	0.302224	0.685151	1.275	0.187273	0.272098	0.704909
AT1G16430.1	NA	NA	NA	NA	NA	NA	NA	NA
AT4G19110.3	1.34	0.48925	0.359701	0.405004	1.072	0.306437	0.323055	0.566222
AT4G19110.2	1.251	0.217743	0.301023	0.683371	1.282	0.189555	0.275516	0.70503
AT3G07860.1	0.409	0.148727	0.196748	0.636364	0.364	0.100545	0.161381	0.72267
AT5G19190.1	1.483	0.522206	0.398432	0.433178	1.609	0.465095	0.461709	0.549315
AT2G04390.1	1.361	0.385833	0.401361	0.570177	1.481	0.410204	0.435426	0.574816
AT1G77350.2	1.139	0.137167	0.27703	0.817999	1.082	0.120146	0.25993	0.836473
AT1G77350.1	1.787	0.437088	0.514141	0.622239	1.276	0.324206	0.401588	0.644489
AT5G12470.1	1.159	0.181932	0.285668	0.734854	0.766	0.147622	0.262296	0.777549
AT5G65990.1	0.824	0.197	0.289279	0.711634	0.777	0.186974	0.223897	0.628247
AT1G07230.1	1.872	0.251019	0.394601	0.731031	1.133	0.226346	0.309364	0.681428
AT1G64990.1	1.179	0.36222	0.383832	0.57716	1.371	0.30664	0.352137	0.606199
AT2G37640.1	0.77	0.15724	0.255545	0.748776	0.991	0.16088	0.281654	0.777802
AT1G05840.1	1.017	0.152015	0.27542	0.78024	1.025	0.107059	0.241007	0.844021
AT4G38510.1	0.819	0.1574	0.239518	0.718735	0.916	0.151467	0.256109	0.753932
AT4G38510.2	0.826	0.182764	0.223433	0.62473	1.023	0.169473	0.276881	0.752654
AT4G38510.3	0.904	0.170186	0.247836	0.705707	0.933	0.151535	0.243013	0.743162
AT4G38510.4	0.825	0.129282	0.202859	0.729523	0.919	0.16459	0.232583	0.694357
AT4G38510.5	0.642	0.0807349	0.158937	0.802818	0.624	0.0561807	0.140652	0.872116
AT1G68260.1	0.379	0.0433143	0.120582	0.885714	0.404	0.0356	0.108199	0.908461
AT1G57680.2	1.236	0.212312	0.333298	0.738974	1.352	0.131955	0.290685	0.839763
AT1G57680.1	1.238	0.229818	0.342561	0.720465	1.367	0.148373	0.284469	0.795354
AT1G55340.1	1.555	0.26642	0.328004	0.634777	1.307	0.271647	0.348394	0.659485
AT1G55340.2	1.631	0.27998	0.344324	0.634332	1.374	0.284767	0.366457	0.66086
AT3G18600.1	1.418	0.188	0.322587	0.766289	1.316	0.193099	0.33282	0.773549
AT5G51300.3	0.935	0.243125	0.327782	0.667738	0.625	0.172063	0.234769	0.678918
AT5G51300.2	NA	NA	NA	NA	NA	NA	NA	NA
AT4G28030.1	NA	NA	NA	NA	NA	NA	NA	NA
AT2G17820.1	1.799	0.281	0.414606	0.711997	1.623	0.31404	0.421728	0.677908
AT2G34750.1	1.757	0.407953	0.459291	0.602317	1.676	0.358717	0.453738	0.652087
AT4G09320.1	0.29	0.0241667	0.0801518	0.916667	0	0	0	NA
AT2G38290.1	0.794	0.0994493	0.203467	0.823362	0.952	0.150087	0.247616	0.749411
AT1G73250.1	1.233	0.210897	0.325614	0.726079	0.729	0.0880513	0.203568	0.854099
AT5G59160.2	1.342	0.280202	0.374169	0.670924	1.537	0.170362	0.339215	0.813036
AT2G38290.2	1.577	0.114969	0.251854	0.838827	1.898	0.141196	0.282616	0.801949
AT5G52560.1	1.299	0.155633	0.323833	0.828531	1.329	0.160762	0.320506	0.816671
AT5G16220.1	1.44	0.51008	0.474813	0.5216	1.193	0.52176	0.39559	0.431776
AT1G47340.1	0	0	0	NA	0.489	0.0168621	0.0892257	0.965517
AT5G09410.1	1.324	0.12189	0.269349	0.839183	1.319	0.167154	0.305031	0.78446
AT5G09410.2	1.321	0.121429	0.268707	0.839515	1.337	0.169473	0.309186	0.784394
AT2G30540.1	1.511	0.257684	0.361304	0.692739	1.128	0.225581	0.303388	0.680013
AT1G10650.1	1.238	0.0906973	0.250638	0.891816	1.094	0.081173	0.215593	0.886343
AT1G10650.2	1.264	0.0842082	0.244076	0.901529	1.106	0.0896372	0.221132	0.870525
AT1G10840.2	1.519	0.21059	0.344611	0.752605	1.679	0.228073	0.375673	0.756469
AT2G18300.1	1.25	0.219526	0.315176	0.701474	1.284	0.312404	0.402358	0.660828
AT2G18300.3	1.243	0.199042	0.315885	0.742652	1.506	0.234713	0.374541	0.745832
AT2G18300.2	1.243	0.218088	0.313264	0.701658	1.28	0.311351	0.401185	0.661044
AT1G11720.1	1.121	0.107975	0.248639	0.855565	1.2	0.106185	0.253594	0.865264
AT1G15420.1	1.489	0.259759	0.391907	0.725327	1.513	0.257796	0.374104	0.698836
AT1G24340.1	1.516	0.0785385	0.229762	0.895554	1.069	0.0443654	0.163131	0.933784
AT5G19090.1	1.474	0.236798	0.314179	0.666172	1.149	0.238555	0.320578	0.679131
AT5G09820.1	1.016	0.183448	0.306952	0.762043	0.718	0.0968276	0.215591	0.847775
AT3G26420.1	0.981	0.337581	0.324084	0.529635	1.635	0.274884	0.375616	0.663385
AT5G51440.1	0.268	0.0291304	0.0834169	0.891304	0.433	0.0282391	0.106912	0.934783
AT2G39360.1	0.798	0.07725	0.192759	0.865638	0.777	0.057625	0.169993	0.900798
AT3G09970.1	0.34	0.0305	0.0938922	0.907787	0.553	0.052125	0.142039	0.888589
AT2G29450.1	1.169	0.55025	0.396589	0.412751	1.451	0.463769	0.317167	0.379689
AT1G72010.1	1.13	0.180577	0.316714	0.778382	1.209	0.196365	0.337903	0.766246
AT5G47710.1	0.838	0.169979	0.250553	0.705308	0.713	0.0987396	0.207588	0.829218
AT2G45540.2	1.674	0.207836	0.37235	0.77344	1.52	0.206629	0.354378	0.768574
AT3G15390.2	0	0	0	NA	0.463	0.02315	0.100909	0.95
AT3G14075.1	1.43	0.253225	0.373568	0.710681	1.026	0.211236	0.312681	0.712273
AT3G01910.2	0.605	0.08125	0.162425	0.811538	0.319	0.0166563	0.065831	0.943656
AT3G09630.2	1.414	0.330045	0.384379	0.617098	1.566	0.335636	0.451167	0.674524
AT3G05727.1	1.348	0.29425	0.348421	0.618587	2.088	0.595068	0.684661	0.610076
AT3G54430.1	1.743	0.338461	0.479678	0.700933	2.038	0.284479	0.423175	0.713229
AT2G20130.1	0.774	0.0500698	0.154917	0.909564	1.062	0.0541395	0.186895	0.92773
AT3G01910.1	0.948	0.0661071	0.187201	0.898787	0.777	0.04925	0.133511	0.883033
AT2G42320.1	1.423	0.117455	0.293037	0.872243	1.314	0.123036	0.262649	0.827502
AT2G42320.2	1.464	0.121307	0.26819	0.840676	1.311	0.157472	0.268864	0.764422
AT5G47710.2	0.655	0.0467654	0.145055	0.910699	0.873	0.043679	0.153195	0.930706
AT4G25740.2	1.511	0.380872	0.513008	0.682976	1.79	0.38066	0.551488	0.7113
AT4G25740.1	1.448	0.360787	0.490719	0.68707	1.723	0.35883	0.526146	0.716004
AT2G45560.2	1.04	0.0960769	0.275493	0.885139	0.605	0.0930769	0.218285	0.846154
AT2G45560.1	1.107	0.0156623	0.125686	0.984881	0.642	0.0333506	0.142474	0.948052
AT5G48030.1	0.851	0.150177	0.233173	0.729886	1.429	0.185747	0.31268	0.756052
AT5G44572.1	1.537	0.497333	0.483196	0.538755	3.132	0.794917	0.810651	0.544641
AT5G66510.2	1.632	0.452339	0.498842	0.596004	1.995	0.360726	0.478014	0.66888
AT4G09730.1	1.064	0.22921	0.304364	0.674174	1.133	0.179952	0.29032	0.749833
AT5G66510.1	1.63	0.376857	0.478743	0.656403	1.999	0.317805	0.451916	0.696093
AT2G15570.1	0.425	0.0622941	0.128613	0.824863	0.419	0.0630588	0.137772	0.836699
AT1G54170.1	1.431	0.231647	0.347637	0.72181	1.512	0.254259	0.334743	0.662976
AT2G15570.2	0.434	0.0642941	0.131953	0.823314	0.427	0.066	0.143632	0.83412
AT4G00620.1	1.397	0.196017	0.350018	0.782815	1.826	0.211325	0.379971	0.770955
AT2G35260.1	1.362	0.459081	0.409621	0.502092	1.308	0.443435	0.376894	0.482277
AT3G02900.2	0	0	0	NA	0	0	0	NA
AT4G39710.1	1.364	0.2	0.345776	0.769823	1.419	0.36071	0.437489	0.63679
AT4G34230.1	1.001	0.173641	0.270233	0.727998	0.653	0.189949	0.197198	0.566775
AT4G39710.2	1.589	0.205724	0.356679	0.767172	2.22	0.310948	0.480447	0.727313
AT1G79350.1	0.86	0.149035	0.251908	0.758809	0.977	0.102956	0.218771	0.833982
AT1G26260.2	0.677	0.0507447	0.150645	0.902538	0.588	0.0658298	0.175922	0.884278
AT1G25275.3	1.667	0.663879	0.436386	0.368928	1.683	0.728333	0.512425	0.40238
AT1G25275.2	1.547	0.683	0.377407	0.309219	1.581	0.76871	0.449472	0.334574
AT1G25275.1	1.63	0.666088	0.430662	0.364465	1.673	0.752559	0.50843	0.387018
AT1G53430.2	0.757	0.0223403	0.100048	0.954839	0.918	0.0113821	0.085963	0.983417
AT3G09050.1	1.079	0.0311604	0.141632	0.957297	0.606	0.0342453	0.123631	0.934056
AT3G15640.2	1.605	0.222196	0.340148	0.725617	1.444	0.258351	0.399349	0.736068
AT3G15640.1	1.604	0.223103	0.340257	0.724191	1.446	0.262103	0.401051	0.73229
AT3G22190.2	1.342	0.227175	0.352183	0.736557	1.646	0.209896	0.35885	0.766017
AT1G01040.2	0.421	0.0155926	0.0795069	0.962963	0.418	0.0154815	0.0789404	0.962963
AT5G14030.4	1.34	0.382551	0.409125	0.583603	1.435	0.299429	0.390584	0.66346
AT2G46170.2	0.94	0.169405	0.286308	0.761988	0.781	0.168143	0.254037	0.722822
AT1G01040.1	0.678	0.0348144	0.121258	0.925245	0.846	0.0445449	0.141413	0.911894
AT5G14030.2	1.334	0.379388	0.407268	0.58525	1.427	0.296939	0.388366	0.664633
AT5G14030.3	1.34	0.382408	0.409085	0.583725	1.434	0.299367	0.390398	0.663365
AT4G36920.2	1.396	0.114072	0.27094	0.858271	1.731	0.123435	0.29224	0.848458
AT4G36920.1	2.091	0.179282	0.393765	0.830016	1.744	0.210647	0.328715	0.711253
AT5G14050.1	2.038	0.2986	0.454869	0.723409	1.598	0.359714	0.435322	0.634322
AT1G60550.1	1.064	0.14327	0.266042	0.795561	0.852	0.13919	0.241813	0.765771
AT1G69640.1	1.361	0.33794	0.392563	0.617938	1.698	0.37794	0.409098	0.585573
AT3G12990.3	0.936	0.250417	0.320055	0.652815	0.868	0.180042	0.275389	0.728468
AT3G12990.2	0.808	0.22225	0.291732	0.663678	0.437	0.095	0.165316	0.760421
AT5G57490.1	1.464	0.218279	0.329817	0.721339	1.405	0.184631	0.337299	0.791168
AT5G53050.3	0.963	0.145848	0.271826	0.796134	1.146	0.151228	0.300615	0.817514
AT3G13870.2	1.345	0.245336	0.33217	0.682043	1.235	0.207158	0.29623	0.698864
AT3G13870.1	1.31	0.286122	0.352414	0.64162	1.212	0.288189	0.349272	0.634498
AT1G53165.2	1.962	0.347138	0.533915	0.729065	2.027	0.283448	0.469058	0.754115
AT1G53165.3	1.926	0.398421	0.49377	0.642472	1.969	0.32985	0.44607	0.674475
AT1G53165.1	1.924	0.397234	0.49295	0.643007	1.976	0.329224	0.446617	0.67561
AT2G27210.1	1.245	0.109659	0.262491	0.862559	1.072	0.1095	0.234531	0.834561
AT4G34730.1	1.442	0.197801	0.310807	0.733045	1.641	0.190149	0.321333	0.757836
AT2G47070.1	1.226	0.223973	0.331921	0.718621	1.125	0.188375	0.307775	0.754808
AT2G27210.2	1.274	0.0766584	0.228084	0.906125	1.094	0.0765545	0.204749	0.886587
AT2G30930.1	1.082	0.255865	0.310497	0.637645	1.635	0.250423	0.440467	0.779255
AT4G03410.1	1.5	0.0368875	0.18503	0.965516	1.671	0.0376825	0.19194	0.966374
AT3G14595.1	0.972	0.1378	0.259248	0.794037	0.902	0.0955333	0.207694	0.839803
AT3G08530.1	1.131	0.299571	0.357666	0.628818	1.052	0.214671	0.287476	0.669651
AT5G14970.1	1.356	0.336373	0.394584	0.623947	1.236	0.218644	0.346514	0.732682
AT2G41160.1	1.947	0.220831	0.406164	0.781925	1.292	0.124236	0.285998	0.848024
AT5G56340.1	1.344	0.243471	0.333553	0.685136	1.571	0.256442	0.377095	0.710963
AT1G21200.1	0.418	0.0388837	0.121414	0.906977	0.662	0.0793953	0.185463	0.85383
AT2G27950.1	1.13	0.124584	0.253366	0.821313	1.232	0.0948216	0.197347	0.820531
AT5G01390.2	1.999	0.361614	0.498247	0.686652	1.92	0.48293	0.577731	0.631801
AT2G36620.1	1.061	0.173026	0.260316	0.720077	0.841	0.145385	0.256907	0.782671
AT3G06350.1	0.961	0.193586	0.290276	0.719077	1.179	0.36731	0.443831	0.633483
AT2G35620.1	0.87	0.0702273	0.193123	0.891315	0.901	0.0596818	0.169418	0.892968
AT3G13310.1	1.345	0.181712	0.366808	0.823628	2.086	0.192076	0.417309	0.831249
AT2G28840.1	1.504	0.361063	0.406226	0.601546	1.681	0.327234	0.43046	0.669748
AT1G18590.1	1.079	0.366771	0.393956	0.58184	1.401	0.249029	0.359005	0.7024
AT2G28840.2	1.522	0.454	0.442362	0.534344	1.597	0.451309	0.508856	0.605045
AT5G08139.1	0.543	0.0558806	0.131067	0.852468	0.68	0.0757015	0.15976	0.830224
AT4G35800.1	1.046	0.244305	0.305892	0.64574	1.21	0.220034	0.309185	0.689438
AT2G04790.2	NA	NA	NA	NA	NA	NA	NA	NA
AT1G21750.2	0.827	0.200237	0.2776	0.689789	1.023	0.226605	0.246907	0.572789
AT3G18230.1	NA	NA	NA	NA	NA	NA	NA	NA
AT1G26090.1	0.885	0.119818	0.247531	0.816814	1.115	0.0530606	0.211334	0.945659
AT5G41520.1	1.652	0.38977	0.431604	0.584609	1.339	0.33577	0.361696	0.584209
AT5G41520.2	1.649	0.378085	0.401029	0.569886	1.395	0.326408	0.368924	0.605021
AT5G12200.1	0.765	0.167692	0.256946	0.727668	1.35	0.199231	0.334221	0.761342
AT4G19170.1	0.647	0.0999394	0.199275	0.818862	1.582	0.192182	0.346832	0.775112
AT4G25280.1	NA	NA	NA	NA	NA	NA	NA	NA
AT4G22690.1	0.698	0.0200548	0.0906884	0.955097	1.476	0.0462511	0.181953	0.940588
AT3G17800.2	1.257	0.0754161	0.19833	0.882196	0.837	0.0945093	0.185887	0.812931
AT4G24090.1	NA	NA	NA	NA	NA	NA	NA	NA
AT3G17800.1	1.251	0.0760932	0.20007	0.882716	0.831	0.0935714	0.184736	0.813872
AT1G77670.1	0.887	0.131721	0.2531	0.807893	1.357	0.211791	0.357814	0.765447
AT4G17310.2	1.992	0.439643	0.671518	0.731692	1.711	0.322119	0.426411	0.658235
AT3G47680.1	1.806	0.297669	0.401806	0.677913	2.231	0.24566	0.402523	0.749757
AT2G01570.1	1.617	0.271878	0.372293	0.681506	1.572	0.290153	0.394121	0.681786
AT2G45960.2	1.155	0.208375	0.293314	0.699394	0.917	0.19867	0.280338	0.701908
AT3G62410.1	1.237	0.344714	0.357756	0.561298	1.068	0.314971	0.341588	0.584574
AT1G20780.1	1.241	0.174047	0.304695	0.772923	1.127	0.117567	0.276662	0.857996
AT2G45960.1	1.121	0.204318	0.285986	0.697165	0.907	0.197045	0.276536	0.699739
AT1G09010.1	1.297	0.207019	0.373481	0.789842	1.107	0.215889	0.328231	0.727899
AT3G06740.1	1.115	0.236448	0.29149	0.639575	1.468	0.2205	0.317038	0.69423
AT5G05860.1	0.9	0.218808	0.290692	0.666529	0.737	0.102731	0.185765	0.780131
AT4G28440.1	1.16	0.450606	0.415111	0.515335	0.931	0.336182	0.335324	0.549754
AT2G46680.2	1.79	0.296446	0.455064	0.728731	0.659	0.116264	0.15081	0.6582
AT3G43980.1	1.437	0.369806	0.363053	0.534117	1.235	0.323194	0.381271	0.623628
AT3G60410.3	0.91	0.0994528	0.216312	0.832644	0.906	0.130208	0.244085	0.794711
AT2G19680.2	0.912	0.1045	0.259067	0.868687	1.246	0.386	0.488726	0.649827
AT3G60410.1	0.88	0.0961698	0.209169	0.832639	0.869	0.124962	0.234253	0.794715
AT2G01640.1	1.412	0.189556	0.308196	0.739091	1.09	0.240711	0.32827	0.686948
AT1G73440.1	1.094	0.270897	0.352968	0.664842	0.99	0.255667	0.33862	0.674855
AT5G07440.1	0.879	0.127382	0.222354	0.773778	1.309	0.0635392	0.231045	0.93572
AT4G14040.1	1.536	0.339393	0.453011	0.666004	1.968	0.495679	0.571134	0.605614
AT5G07440.3	0.975	0.155854	0.254744	0.750598	1.564	0.0869326	0.29369	0.926353
AT5G07440.2	0.868	0.156661	0.248174	0.741629	1.283	0.131881	0.310061	0.859569
AT3G18680.1	1.537	0.222261	0.34136	0.721338	1.145	0.254536	0.329994	0.663907
AT1G64490.1	1.023	0.175053	0.31064	0.776941	1.535	0.294632	0.467303	0.741449
AT1G52320.3	NA	NA	NA	NA	NA	NA	NA	NA
AT2G17870.1	1.052	0.3023	0.38942	0.660519	1.07	0.29915	0.331096	0.593891
AT3G08510.1	1.421	0.227123	0.330288	0.709179	1.265	0.206037	0.330134	0.748251
AT1G68300.1	1.062	0.136381	0.280667	0.828567	1.4	0.160651	0.330966	0.828361
AT1G70520.1	1.24	0.235105	0.325225	0.688587	1.467	0.312421	0.418008	0.677811
AT5G64070.1	1.024	0.160853	0.26136	0.746357	1.029	0.155604	0.25552	0.752517
AT1G04240.1	1.296	0.126847	0.271748	0.835269	1.682	0.136169	0.317875	0.858752
AT1G01510.1	0.352	0.0432727	0.103872	0.861727	1.069	0.225636	0.390396	0.769467
AT3G08510.3	1.466	0.229534	0.338444	0.714366	1.307	0.212442	0.340762	0.748626
AT5G19530.1	1.72	0.279706	0.379933	0.674064	2.316	0.342676	0.600924	0.771605
AT2G34560.2	0.883	0.106842	0.21082	0.809126	0.933	0.0722895	0.1954	0.88783
AT2G34560.1	0.872	0.115255	0.228928	0.814661	0.762	0.0936809	0.198866	0.835311
AT1G17210.1	1.302	0.108233	0.252206	0.846664	1.16	0.179186	0.297927	0.756531
AT2G32710.2	0.851	0.0936429	0.236535	0.874632	0.967	0.138214	0.284875	0.821373
AT2G32710.1	0.854	0.0420606	0.161875	0.941708	0.944	0.0715152	0.205287	0.89697
AT1G12430.1	0.422	0.0301429	0.108682	0.928571	0.427	0.0261429	0.10237	0.938776
AT4G29430.1	0.499	0.0475	0.132279	0.892911	0.716	0.183429	0.259558	0.69437
AT1G24793.1	0.921	0.2407	0.321568	0.67042	0.651	0.1471	0.233156	0.732767
AT1G24793.2	0.991	0.2588	0.345817	0.670479	0.698	0.1578	0.250079	0.7327
AT5G44450.1	NA	NA	NA	NA	NA	NA	NA	NA
AT5G44190.1	1.082	0.175786	0.282717	0.734762	1.072	0.14975	0.295632	0.809708
AT2G32730.1	0.916	0.125333	0.218144	0.762587	0.992	0.0848472	0.1912	0.839706
AT1G11360.2	0.835	0.0752059	0.189015	0.875852	1.09	0.107706	0.259027	0.866042
AT4G23570.2	0.806	0.130444	0.223172	0.767124	0.731	0.0896825	0.198255	0.837736
AT4G23570.3	0.821	0.133095	0.227492	0.766747	0.744	0.091254	0.201727	0.837739
AT2G31810.2	1.247	0.226644	0.294271	0.648764	1.366	0.268444	0.378706	0.699895
AT4G23570.1	0.807	0.0890746	0.191351	0.834826	0.919	0.0795224	0.198694	0.867593
AT5G17020.2	1.083	0.120325	0.262353	0.840997	0.954	0.0881566	0.235392	0.88712
AT5G17020.1	1.083	0.124838	0.266202	0.835069	0.959	0.091975	0.240443	0.882855
AT3G12580.1	0.957	0.223844	0.270094	0.630462	1.023	0.175016	0.284814	0.749764
AT4G26270.1	0.418	0.0529467	0.139026	0.873333	0.604	0.04002	0.127827	0.914839
AT4G15450.1	1.068	0.337533	0.333284	0.529646	0.66	0.1494	0.203543	0.670296
AT1G48600.1	1.056	0.270903	0.347383	0.660657	0.931	0.254935	0.280647	0.590752
AT3G07360.2	1.425	0.219432	0.324236	0.715665	1.67	0.226527	0.373976	0.756025
AT3G07360.3	1.421	0.216689	0.322273	0.718083	1.671	0.22619	0.373869	0.756471
AT3G07360.1	1.195	0.114307	0.23757	0.82704	1.07	0.136159	0.256779	0.799039
AT3G21200.1	0.695	0.0849697	0.198687	0.860481	1.467	0.117879	0.309019	0.881016
AT1G67325.2	1.103	0.0860897	0.236947	0.895039	1.546	0.0997607	0.259315	0.882367
AT1G67325.1	1.052	0.265412	0.346051	0.66748	1.462	0.309632	0.3653	0.618295
AT2G27330.1	1.467	0.324343	0.405994	0.643204	1.454	0.4122	0.440169	0.57432
AT1G73110.1	0.925	0.1976	0.305073	0.731883	0.722	0.128	0.239955	0.796875
AT5G49760.1	1.407	0.200504	0.363523	0.789377	1.288	0.155675	0.353429	0.853594
AT4G25360.1	1.159	0.0859607	0.224919	0.879494	0.894	0.0859494	0.202811	0.858198
AT4G25360.2	1.159	0.0699261	0.21274	0.909295	0.712	0.050767	0.15496	0.909085
AT1G71860.2	1.091	0.124778	0.251678	0.818086	0.896	0.121123	0.228425	0.796549
AT1G71860.3	1.078	0.117065	0.242744	0.825661	0.894	0.131348	0.237668	0.783672
AT1G71860.1	1.074	0.119022	0.242363	0.82102	0.875	0.128554	0.23282	0.783996
AT3G06868.1	0.986	0.117932	0.233405	0.81019	1.061	0.167432	0.28734	0.759647
AT4G00300.2	0.588	0.0594314	0.153365	0.876783	0.461	0.0271176	0.108471	0.941176
AT1G61450.1	0.706	0.12125	0.220372	0.788128	0.666	0.100969	0.208729	0.82843
AT3G47000.1	0.575	0.167211	0.228003	0.673724	0.859	0.181526	0.291791	0.744106
AT3G63190.1	1.415	0.248333	0.35061	0.698161	1.731	0.258417	0.383755	0.711173
AT5G14660.2	1.268	0.138878	0.276086	0.808485	0.85	0.0833415	0.200733	0.864258
AT2G39990.1	1.25	0.213788	0.375745	0.778494	1.231	0.223038	0.357567	0.749197
AT1G10820.2	1.556	0.163835	0.314614	0.802944	1.516	0.129278	0.297925	0.851496
AT4G18810.2	0.568	0.0243947	0.106238	0.953302	0.329	0.00865789	0.0526639	0.973684
AT5G39830.1	0.595	0.0881842	0.187324	0.832375	1.264	0.0847368	0.24502	0.893756
AT5G39830.2	0.595	0.0879737	0.187353	0.832919	1.257	0.0842368	0.243613	0.893775
AT4G32260.1	1.109	0.278068	0.32923	0.628134	1.378	0.282548	0.359625	0.650769
AT1G59900.1	0.922	0.187077	0.263904	0.697903	1.067	0.16641	0.25995	0.730291
AT2G43235.1	0.726	0.1452	0.2904	0.8	1.199	0.1663	0.370991	0.844197
AT5G44320.1	0.37	0.1018	0.157306	0.718075	0.77	0.1765	0.283144	0.743626
AT5G47890.1	1.237	0.251929	0.340829	0.665509	1.185	0.355	0.350353	0.543482
AT1G63980.2	1.298	0.30525	0.369831	0.63298	1.176	0.206979	0.306432	0.707614
AT2G34357.1	1.047	0.0687946	0.182443	0.877928	0.744	0.0635357	0.171508	0.883281
AT3G01090.3	0.4	0.0119403	0.0680702	0.970149	1.234	0.0756866	0.233832	0.907107
AT4G32720.1	1.01	0.116463	0.218462	0.790843	0.767	0.138963	0.234238	0.760296
AT4G23820.1	0.98	0.26764	0.301315	0.598057	1.327	0.27676	0.394039	0.700541
AT2G47980.1	1.177	0.296096	0.360228	0.637104	1.485	0.290711	0.380397	0.668255
AT4G32720.2	1.025	0.118148	0.221713	0.791019	0.782	0.141759	0.238874	0.760174
AT3G49645.1	0.803	0.177175	0.281579	0.732607	0.928	0.139439	0.267071	0.797138
AT3G56990.1	0.642	0.108656	0.192235	0.76491	0.401	0.0626562	0.1456	0.84375
AT5G62200.1	1.547	0.382529	0.462129	0.623911	1.56	0.345765	0.430606	0.634329
AT4G01560.1	1.66	0.343364	0.488855	0.704204	1.4	0.248818	0.365787	0.710857
AT3G57870.1	1.676	0.301512	0.382039	0.637383	1.754	0.44014	0.453118	0.558078
AT5G25780.1	0.851	0.0564179	0.166257	0.901248	0.39	0.0523881	0.132992	0.865672
AT1G54060.1	0.836	0.0491325	0.152271	0.912283	0.782	0.0496424	0.1444	0.898204
AT3G55270.1	1.52	0.199912	0.357555	0.785371	1.561	0.211094	0.363816	0.77061
AT3G62010.1	1.575	0.305961	0.403089	0.661434	1.701	0.350196	0.436145	0.645936
AT1G53890.3	1.177	0.254194	0.376274	0.71861	1.47	0.312258	0.446293	0.689716
AT1G56045.1	1.962	0.452703	0.46918	0.555966	1.979	0.428622	0.456358	0.563963
AT1G53890.2	0.44	0.0623158	0.137578	0.840683	1.744	0.233474	0.489358	0.830027
AT4G26710.1	1.093	0.222195	0.357083	0.74934	0.906	0.15422	0.264374	0.766972
AT4G26710.2	1.109	0.174521	0.248871	0.686202	0.918	0.107	0.233345	0.841373
AT5G55160.1	1.582	0.312421	0.346042	0.589326	1.346	0.357961	0.39103	0.592557
AT1G53890.1	0.384	0.0553684	0.120742	0.837903	1.591	0.213	0.446455	0.830037
AT5G55160.2	1.669	0.34525	0.372454	0.577094	1.406	0.39975	0.426275	0.582814
AT1G62430.1	1.33	0.150017	0.296482	0.810919	1.235	0.127487	0.26967	0.830796
AT2G02930.1	1.729	0.178053	0.439522	0.872636	1.866	0.126	0.362483	0.897854
AT1G30260.1	1.621	0.274571	0.401811	0.704657	1.315	0.231071	0.312091	0.666582
AT4G27230.1	1.309	0.271317	0.34729	0.657155	1.159	0.182902	0.308858	0.763074
AT4G27230.2	1.409	0.224717	0.350411	0.736438	1.276	0.156264	0.310862	0.815936
AT5G16290.1	1.332	0.225047	0.322857	0.694474	0.876	0.152109	0.247622	0.740099
AT4G34370.1	0.749	0.095375	0.208492	0.836362	1.014	0.0600865	0.191564	0.918355
AT1G64142.1	1.323	0.231	0.29358	0.649837	1.25	0.229155	0.306082	0.673196
AT4G34370.2	0.756	0.0785985	0.196555	0.87035	1.024	0.0493066	0.173781	0.931791
AT1G51980.2	0.742	0.138298	0.207183	0.70853	0.741	0.0970238	0.187513	0.801379
AT3G05560.3	1.182	0.0691343	0.187277	0.887035	1.286	0.0734328	0.218098	0.906833
AT5G18230.2	0.921	0.14325	0.245495	0.769836	1.145	0.223802	0.32852	0.714195
AT5G18230.1	0.92	0.156052	0.257607	0.758162	1.152	0.213862	0.317158	0.718709
AT1G55690.3	1.249	0.227126	0.318361	0.686849	1.306	0.192835	0.295808	0.725766
AT5G64940.2	1.479	0.174071	0.334705	0.807394	1.056	0.195321	0.273995	0.690155
AT5G64940.1	1.474	0.172905	0.333218	0.808058	1.051	0.19406	0.27263	0.690709
AT2G27385.2	0.897	0.0523913	0.182182	0.930671	0.998	0.0485362	0.16568	0.926827
AT2G27385.3	0.897	0.0523623	0.182174	0.930737	1.001	0.0486377	0.166083	0.926863
AT2G27385.1	NA	NA	NA	NA	NA	NA	NA	NA
AT1G26880.1	1.639	0.301774	0.457498	0.724967	1.666	0.316871	0.456107	0.706302
AT1G26880.2	1.763	0.326935	0.493345	0.723217	1.758	0.327194	0.477693	0.711477
AT5G45100.1	1.282	0.25715	0.341028	0.668365	1.045	0.224575	0.321692	0.705357
AT3G56480.1	0.922	0.144907	0.224918	0.730424	1.098	0.16098	0.27048	0.759004
AT1G78630.1	1.319	0.309889	0.359358	0.609059	1.51	0.303444	0.370098	0.622067
AT1G65845.1	NA	NA	NA	NA	NA	NA	NA	NA
AT5G21170.1	0.912	0.0706667	0.165367	0.851338	0.893	0.126048	0.260712	0.822267
AT4G00740.1	0.915	0.100265	0.21808	0.834921	1.361	0.170618	0.336515	0.812617
AT4G30160.1	0.822	0.0517379	0.155053	0.905368	0.653	0.0417573	0.132901	0.91372
AT2G44530.2	0.938	0.0813303	0.19177	0.858873	0.714	0.0935413	0.178615	0.797902
AT2G44530.1	0.931	0.0859174	0.193278	0.846086	0.708	0.095422	0.178813	0.789578
AT5G40670.1	1.304	0.147979	0.309291	0.832809	1.399	0.151514	0.312891	0.826279
AT2G42160.1	0.855	0.150654	0.262157	0.770713	1.069	0.172346	0.318463	0.791933
AT1G05850.1	1.206	0.331227	0.339677	0.562391	0.987	0.246213	0.301512	0.640904
AT3G47670.1	0	0	0	NA	0	0	0	NA
AT5G53340.1	1.076	0.110401	0.22171	0.813073	1.154	0.105989	0.217431	0.820891
AT2G20630.2	1.177	0.268079	0.323126	0.631845	1.496	0.26995	0.366322	0.679798
AT1G23740.1	0.861	0.12025	0.211911	0.772375	0.612	0.0936833	0.17943	0.803638
AT2G20630.1	1.132	0.209023	0.296895	0.700721	1.408	0.207069	0.322419	0.733642
AT2G21160.1	1.022	0.165967	0.259081	0.730491	1.13	0.137583	0.241508	0.772952
AT2G21160.2	1.116	0.180767	0.282722	0.731001	1.246	0.153817	0.266922	0.76855
AT2G25520.1	1.862	0.4095	0.472287	0.609185	1.692	0.348256	0.427533	0.640005
AT1G32240.1	1.11	0.0926923	0.229942	0.869142	1.102	0.12816	0.251283	0.807491
AT5G04740.2	0.875	0.0821111	0.197895	0.865109	0.698	0.0587778	0.159242	0.888133
AT5G04740.1	0.866	0.0807333	0.195432	0.865951	0.696	0.0582222	0.158534	0.889059
AT3G06580.1	1.678	0.243494	0.356105	0.703468	1.327	0.233977	0.363151	0.734952
AT3G10350.1	1.031	0.240487	0.331858	0.688472	0.97	0.232333	0.358208	0.731181
AT1G21770.1	1.311	0.248182	0.285519	0.541908	1.053	0.244818	0.35544	0.712065
AT1G64670.1	0.972	0.106393	0.227637	0.829737	0.686	0.0509107	0.150172	0.90078
AT1G31070.2	1.171	0.318638	0.376802	0.626747	1.069	0.355517	0.36205	0.559244
AT5G61020.2	0.811	0.196944	0.257685	0.667003	0.977	0.196481	0.273073	0.690184
AT4G33780.1	0.716	0.253182	0.29083	0.597356	0.299	0.0959091	0.127743	0.659199
AT1G77810.1	0.846	0.0583273	0.175459	0.907096	0.667	0.0293273	0.120188	0.949152
AT3G11710.1	1.649	0.208745	0.356268	0.750078	1.148	0.151843	0.274646	0.78044
AT1G77810.2	0.818	0.168375	0.266759	0.736591	0.33	0.020625	0.0798803	0.9375
AT5G42070.1	1.246	0.163971	0.298131	0.783893	1.292	0.196059	0.364804	0.796659
AT5G14030.1	1.322	0.377918	0.403724	0.583119	1.4	0.290673	0.380998	0.665567
AT3G50550.1	NA	NA	NA	NA	NA	NA	NA	NA
AT3G11770.1	1.722	0.235867	0.399638	0.748847	1.798	0.251756	0.44631	0.7741
AT1G64650.2	0.488	0.0221818	0.10165	0.954545	0.389	0.0412576	0.119779	0.893939
AT1G59980.1	1.027	0.0582374	0.17832	0.906917	0.826	0.0661942	0.190094	0.900026
AT1G03630.1	1.291	0.235324	0.316654	0.667589	1.436	0.2455	0.386183	0.728162
AT3G03870.2	1.274	0.138718	0.281451	0.81754	1.28	0.167736	0.305869	0.78474
AT3G03870.1	1.242	0.134945	0.274095	0.817914	1.217	0.158245	0.290159	0.786508
AT5G66140.1	1.236	0.329951	0.377043	0.607059	1.107	0.266439	0.349322	0.66561
AT2G17230.1	1.245	0.554833	0.35821	0.366664	1.651	0.61675	0.516113	0.474863
AT3G53668.1	1.045	0.162229	0.258207	0.737267	0.785	0.113276	0.23508	0.824738
AT4G21090.3	1.065	0.0972442	0.228359	0.858767	1.07	0.0662093	0.197146	0.905649
AT4G21090.2	1.065	0.0997634	0.222056	0.842652	1.05	0.10629	0.218242	0.815879
AT4G21090.1	1.065	0.0971333	0.225892	0.855962	1.047	0.0979	0.211092	0.828597
AT4G27840.1	1.091	0.0944587	0.218224	0.84578	0.76	0.0827615	0.18109	0.839173
AT2G28940.1	1.368	0.175144	0.293456	0.754367	1.104	0.156351	0.293033	0.797634
AT2G28940.2	NA	NA	NA	NA	NA	NA	NA	NA
AT3G53740.3	1.574	0.265143	0.369572	0.653342	0.814	0.261714	0.282079	0.584269
AT5G35590.1	1.288	0.338219	0.351778	0.566834	1.36	0.238	0.327776	0.677857
AT4G11010.1	1.196	0.224732	0.345088	0.731411	0.883	0.194732	0.289956	0.722048
AT3G54690.1	1.338	0.265176	0.377854	0.703534	1.353	0.383324	0.455741	0.629305
AT1G29530.1	1.968	0.479429	0.560704	0.618284	1.7	0.37081	0.521619	0.699395
AT5G48760.1	0.962	0.141045	0.282382	0.818314	1.064	0.158636	0.313581	0.814014
AT1G76990.5	0.77	0.0623896	0.162918	0.879555	0.892	0.0537338	0.155609	0.897914
AT5G48760.2	0.966	0.100083	0.249297	0.874098	1.07	0.122125	0.293462	0.862604
AT1G43710.1	1.467	0.145522	0.298184	0.818644	1.075	0.235543	0.307802	0.663207
AT4G31010.1	0.88	0.127219	0.252267	0.813352	0.829	0.107625	0.229417	0.826383
AT2G44525.1	0.723	0.158633	0.25763	0.74861	0.905	0.128767	0.253004	0.810726
AT1G79570.1	0.789	0.0614072	0.180907	0.901826	1.075	0.0523454	0.166014	0.913742
AT3G53740.2	1.27	0.205972	0.315978	0.725193	0.995	0.246639	0.354232	0.707734
AT3G51640.2	0.465	0.0353165	0.123186	0.924051	0.697	0.0366709	0.130606	0.929665
AT5G47180.1	0.709	0.0514638	0.149593	0.902477	0.922	0.0896087	0.226571	0.875955
AT5G47180.2	1.438	0.23343	0.317083	0.675096	1.399	0.204767	0.324827	0.740282
AT3G51640.1	0.826	0.0466667	0.137923	0.89774	0.791	0.0511921	0.153229	0.905779
AT2G02360.1	0.476	0.0566316	0.134876	0.859323	0.351	0.0738947	0.143097	0.789474
AT5G50580.1	1.57	0.176623	0.321446	0.78512	1.578	0.146558	0.327509	0.847856
AT5G50580.2	1.512	0.171805	0.3106	0.782963	1.522	0.141286	0.315733	0.847843
AT5G38895.1	0.858	0.0473306	0.160042	0.921472	0.923	0.0304876	0.129033	0.948359
AT5G20840.1	0.95	0.0640962	0.189507	0.904044	0.93	0.0595017	0.165556	0.889303
AT1G22400.1	1.277	0.391452	0.400329	0.562831	0.866	0.246476	0.256149	0.565508
AT3G47480.1	0	0	0	NA	0	0	0	NA
AT3G50550.2	NA	NA	NA	NA	NA	NA	NA	NA
AT4G39970.1	0.72	0.109762	0.197573	0.77837	1.417	0.148786	0.320275	0.831878
AT5G13560.1	1.373	0.305492	0.398867	0.663633	1.19	0.246286	0.324134	0.668651
AT5G05360.2	0.952	0.282	0.340085	0.628083	1.066	0.222296	0.360249	0.747911
AT3G59990.3	1.229	0.18725	0.354627	0.799935	0.994	0.183194	0.309335	0.767614
AT5G05360.1	0.903	0.237781	0.310278	0.662295	0.998	0.189781	0.32287	0.763713
AT5G10980.1	1.328	0.158547	0.292699	0.791225	1.544	0.219	0.319381	0.704802
AT4G28100.1	1.374	0.165651	0.312259	0.798073	1.072	0.176593	0.307181	0.775367
AT2G23290.1	0.817	0.193618	0.248637	0.655532	0.687	0.1868	0.254251	0.671149
AT1G56610.2	1.765	0.479563	0.58782	0.639409	1.233	0.367688	0.483462	0.655119
AT4G03260.1	1.472	0.171004	0.318752	0.794972	1.24	0.156483	0.289428	0.794437
AT3G44340.1	1.135	0.244286	0.349086	0.699811	1.148	0.193317	0.293904	0.715846
AT3G44340.2	1.187	0.255921	0.365359	0.699381	1.197	0.201635	0.306565	0.715744
AT2G29530.2	1.161	0.406176	0.324464	0.451604	1.259	0.392147	0.388178	0.545336
AT5G40610.1	0.543	0.0381481	0.114368	0.906598	0.565	0.0627778	0.177562	0.888889
AT2G16280.1	1.402	0.210948	0.331997	0.739322	1.387	0.203689	0.332733	0.751551
AT4G08980.3	0.424	0.0212	0.0924087	0.95	0.481	0.0196	0.0877217	0.955676
AT4G29070.1	1.171	0.178306	0.328213	0.794841	1.122	0.149944	0.266022	0.776779
AT4G30190.1	1.769	0.395169	0.47965	0.628057	1.684	0.278831	0.39315	0.693343
AT4G30190.2	1.775	0.374164	0.478029	0.650008	1.709	0.272	0.395474	0.705619
AT2G20230.1	1.322	0.143343	0.274967	0.802136	1.742	0.170036	0.348399	0.821447
AT1G06510.1	0.465	0.0686774	0.138415	0.819012	1.077	0.123355	0.248832	0.813419
AT3G13480.1	0.899	0.276327	0.298666	0.586907	0.759	0.183927	0.229683	0.647575
AT2G32520.1	0.943	0.212277	0.301496	0.699102	0.597	0.127213	0.195701	0.727141
AT2G36160.1	1.211	0.343321	0.35288	0.560978	1.536	0.340302	0.39097	0.608854
AT5G19450.1	0.993	0.181391	0.322011	0.780816	1.121	0.0953043	0.248384	0.872858
AT2G38650.2	1.769	0.274795	0.412082	0.721855	1.328	0.256727	0.351362	0.688688
AT5G46730.1	1.153	0.370538	0.379234	0.548602	0.721	0.280615	0.28473	0.553644
AT5G46730.2	1.142	0.353462	0.377949	0.567741	0.694	0.264923	0.274871	0.563879
AT1G80030.1	0.912	0.237955	0.276759	0.610775	1.116	0.218818	0.329745	0.723538
AT1G56510.1	0.836	0.0580862	0.193034	0.922964	1.285	0.0669483	0.229768	0.92786
AT5G25560.4	1.292	0.194529	0.297979	0.726655	1.448	0.199783	0.31848	0.742149
AT1G80030.2	0.936	0.157753	0.248914	0.735224	1.127	0.154519	0.279437	0.785154
AT5G25560.2	1.112	0.139239	0.268308	0.808581	1.217	0.143422	0.247322	0.765743
AT3G54810.1	0.867	0.0609558	0.177788	0.901378	1.047	0.039531	0.146882	0.937558
AT3G54810.2	1.986	0.388305	0.442	0.597395	1.31	0.325952	0.381976	0.622369
AT5G25560.1	1.112	0.139239	0.268308	0.808581	1.217	0.143257	0.247223	0.766043
AT3G22630.1	1.09	0.215162	0.359536	0.762623	1.446	0.177595	0.348699	0.808911
AT2G31360.1	1.193	0.491829	0.295185	0.339209	1.238	0.469049	0.334658	0.407482
AT5G09250.2	1.064	0.32892	0.386065	0.619981	1.207	0.20254	0.301369	0.706561
AT2G32970.2	0.93	0.0436471	0.163839	0.935905	0.716	0.0291275	0.118946	0.945549
AT5G09250.1	1.06	0.33402	0.383112	0.610506	1.143	0.19428	0.286838	0.703591
AT1G18840.1	0.986	0.0780108	0.220597	0.897731	0.919	0.0585297	0.178149	0.910723
AT1G20950.1	1.306	0.2495	0.384512	0.732542	1.054	0.210704	0.31489	0.722157
AT1G18840.2	0.975	0.0707791	0.216911	0.911114	0.915	0.0572384	0.173016	0.907179
AT1G78660.3	0.674	0.0715806	0.173599	0.863328	1.005	0.114968	0.225264	0.802591
AT1G78660.2	0.66	0.0307429	0.128238	0.949336	0.678	0.0438286	0.147243	0.923598
AT1G78660.1	0.663	0.1015	0.183963	0.780431	0.981	0.169	0.24626	0.698916
AT1G80010.1	1.523	0.260274	0.390929	0.719064	1.34	0.269781	0.357192	0.665006
AT3G22310.1	0.757	0.153964	0.21911	0.691607	0.55	0.128429	0.197974	0.726025
AT4G08980.5	NA	NA	NA	NA	NA	NA	NA	NA
AT5G39040.1	1.076	0.111213	0.246538	0.842744	0.911	0.129298	0.25148	0.808224
AT1G74740.1	1.122	0.130667	0.253078	0.802887	1.041	0.106	0.217018	0.816548
AT4G11211.1	2.592	0.369889	0.586302	0.72686	3.337	0.4459	0.77309	0.76906
AT1G60000.2	1.465	0.1465	0.4395	0.9	0.409	0.1166	0.178804	0.710463
AT1G60000.1	1.392	0.103667	0.307145	0.905145	0.807	0.114889	0.200435	0.764386
AT4G02820.1	0.968	0.297333	0.361953	0.635417	1.433	0.385583	0.506693	0.66582
AT1G68660.2	1.141	0.193371	0.328661	0.761255	1.058	0.184514	0.290138	0.737309
AT1G68660.1	1.138	0.195771	0.32969	0.758594	1.071	0.190057	0.29473	0.732764
AT1G10900.1	2.122	0.275815	0.45454	0.75053	1.282	0.26454	0.368594	0.695172
AT4G22190.1	0.371	0.0115937	0.0645513	0.96875	0.423	0.0264375	0.102392	0.9375
AT3G06700.2	1.511	0.126811	0.289645	0.833875	1.35	0.0847568	0.251783	0.9002
AT4G14410.2	0.587	0.0876912	0.173068	0.812784	0.49	0.09675	0.166776	0.766796
AT4G14410.1	0.788	0.02702	0.106228	0.942918	0.642	0.0354733	0.112003	0.913935
AT5G55300.1	1.069	0.199095	0.250856	0.63971	1.3	0.152014	0.299977	0.813779
AT3G45140.1	1.161	0.492294	0.355761	0.412165	0.73	0.289059	0.224594	0.439321
AT5G55300.3	1.117	0.203554	0.259321	0.643014	1.389	0.161108	0.319983	0.815721
AT5G55300.2	1.1	0.195346	0.256114	0.657304	1.329	0.147615	0.300691	0.822987
AT4G12880.2	1.409	0.279237	0.394114	0.698737	1.637	0.303153	0.420021	0.691568
AT4G33865.1	1.476	0.2287	0.343069	0.706745	1.692	0.286825	0.416759	0.702286
AT4G12880.1	1.06	0.154627	0.314954	0.824693	0.953	0.128255	0.237324	0.794338
AT3G63170.1	1.417	0.178907	0.342515	0.807862	1.367	0.14328	0.301548	0.831303
AT5G56150.2	1.21	0.179745	0.297831	0.749265	0.793	0.166127	0.217614	0.665836
AT2G43550.1	1.049	0.185444	0.331966	0.784169	0.713	0.149833	0.229086	0.720739
AT5G42940.1	1.028	0.0725532	0.213249	0.904252	0.504	0.0589787	0.162009	0.882979
AT1G15130.1	1.187	0.26081	0.302537	0.59779	0.715	0.146976	0.223904	0.722166
AT3G43810.1	1.463	0.302662	0.398434	0.66859	1.496	0.351789	0.401353	0.606327
AT5G58440.1	0.796	0.145855	0.23536	0.74288	0.767	0.103727	0.201403	0.807407
AT3G13740.2	1.043	0.22345	0.333294	0.720262	1.239	0.137	0.300308	0.834927
AT3G27560.1	1.022	0.0703975	0.201132	0.896517	1.419	0.0821757	0.231201	0.893943
AT4G13020.4	1.465	0.162864	0.337145	0.829532	1.174	0.138202	0.270703	0.812773
AT1G25380.1	1.553	0.172694	0.310541	0.781574	1.168	0.201097	0.316257	0.738868
AT5G32470.1	1.123	0.258929	0.374891	0.704374	0.471	0.0376429	0.121049	0.913391
AT2G04030.2	0.682	0.105106	0.19294	0.791196	0.311	0.0655106	0.122747	0.787352
AT2G04030.1	0.68	0.0757432	0.164901	0.839653	0.31	0.0456351	0.106885	0.851631
AT2G40950.1	0.676	0.112951	0.202238	0.769564	0.716	0.124557	0.209531	0.760778
AT5G08180.2	0.858	0.0466875	0.151973	0.92176	1.247	0.0746339	0.212048	0.899361
AT2G01720.1	1.079	0.201637	0.299373	0.714757	1.116	0.156812	0.279269	0.780987
AT3G04120.1	1.183	0.267608	0.352091	0.673348	1.265	0.279014	0.363995	0.66742
AT5G64760.1	1.033	0.117262	0.252777	0.836219	1.231	0.146016	0.304036	0.827741
AT4G25640.2	2.051	0.4695	0.576277	0.641136	1.551	0.374711	0.463988	0.647283
AT3G48070.2	1.522	0.217386	0.356803	0.743311	1.31	0.165566	0.280618	0.756946
AT3G48070.1	1.557	0.221167	0.364202	0.744584	1.342	0.170571	0.286702	0.753903
AT4G25640.1	2.053	0.436024	0.561749	0.661506	1.528	0.34319	0.445193	0.666706
AT1G74800.1	0.95	0.0395833	0.157341	0.943333	0.711	0.0268167	0.120109	0.955428
AT1G11400.2	1.337	0.216164	0.313631	0.708766	1.285	0.205734	0.32082	0.736795
AT2G39725.2	1.522	0.217761	0.435936	0.820716	1.195	0.19687	0.356886	0.790852
AT1G11400.1	1.341	0.224091	0.309675	0.686377	1.296	0.18599	0.301082	0.746972
AT5G17710.1	0.612	0.134222	0.196248	0.710408	0.549	0.160074	0.189637	0.619363
AT5G17710.2	0.607	0.0921087	0.180218	0.812649	0.545	0.113065	0.170896	0.721304
AT5G35790.1	0.805	0.1645	0.248566	0.723305	1.223	0.2089	0.345711	0.758575
AT3G48090.1	1.058	0.255109	0.34504	0.683544	1.234	0.277873	0.353042	0.652337
AT3G48090.2	1.054	0.188641	0.291818	0.732905	1.227	0.182359	0.310241	0.763064
AT4G26860.2	0.725	0.0735	0.185991	0.877731	1.068	0.10376	0.253957	0.869044
AT5G57685.1	1.173	0.309059	0.337038	0.584869	1.387	0.346627	0.406399	0.622458
AT4G10320.1	1.11	0.196304	0.298194	0.72288	1.005	0.159196	0.293945	0.795501
AT5G10690.1	0.768	0.09142	0.2019	0.843863	0.438	0.04746	0.132672	0.890746
AT5G17770.1	0.983	0.1152	0.237279	0.825319	1.13	0.125955	0.256206	0.822235
AT1G43890.3	1.29	0.0879074	0.245373	0.895103	1.124	0.109037	0.276943	0.878862
AT5G54970.1	1.535	0.259944	0.431769	0.759855	1.887	0.30625	0.475799	0.728886
AT5G61530.2	1.131	0.208818	0.323747	0.732728	1.359	0.155465	0.309362	0.815292
AT2G17550.1	0.428	0.0185455	0.0858778	0.956381	0.746	0.0242098	0.11371	0.958812
AT1G17510.1	1.073	0.219432	0.332736	0.72881	1.165	0.263659	0.339271	0.659565
AT5G36250.1	1.073	0.0722624	0.210625	0.902332	0.808	0.0730362	0.209036	0.898919
AT3G20230.1	1.582	0.228634	0.341305	0.691633	1.171	0.190317	0.300541	0.737865
AT1G53040.1	0.842	0.0606218	0.175259	0.895104	1.116	0.0383193	0.162791	0.951327
AT5G45428.1	1.49	0.182505	0.331188	0.785531	1.032	0.194441	0.282925	0.708355
AT2G18280.1	1.243	0.140826	0.257395	0.788361	1.19	0.107637	0.237067	0.844215
AT2G18280.2	1.257	0.115642	0.232963	0.81692	1.056	0.107484	0.224198	0.82829
AT5G54630.1	0.743	0.142406	0.246942	0.775174	1.071	0.296438	0.368438	0.645234
AT2G40070.2	0.611	0.0337317	0.123433	0.934765	0.834	0.0313293	0.126641	0.945034
AT2G44270.1	1.155	0.21113	0.33022	0.728315	0.835	0.0906957	0.211588	0.852224
AT5G03200.1	1.06	0.0790141	0.217289	0.888554	0.828	0.0674366	0.1944	0.898126
AT2G40070.1	1.022	0.062337	0.183152	0.901987	0.864	0.041625	0.138185	0.919228
AT5G58930.1	1.349	0.111596	0.273675	0.871533	1.156	0.0683989	0.183353	0.887588
AT3G02350.1	1.174	0.186333	0.325236	0.776392	0.957	0.123789	0.240065	0.80743
AT2G03690.1	1.447	0.126859	0.276365	0.825201	0.896	0.101329	0.199829	0.81429
AT4G18280.1	1.137	0.393488	0.380262	0.536851	0.769	0.229439	0.223531	0.539365
AT3G12260.1	1.435	0.278294	0.429496	0.73614	1.592	0.239265	0.411722	0.768795
AT2G44210.1	0.877	0.113462	0.214839	0.801455	0.92	0.0917736	0.213647	0.856578
AT1G32550.1	1.205	0.302553	0.394928	0.669267	1.514	0.303277	0.380599	0.639411
AT1G70600.1	0.628	0.184846	0.222016	0.633183	0.718	0.241577	0.245293	0.560586
AT2G37970.1	0.356	0.066	0.136895	0.814091	0.504	0.0860606	0.163799	0.803585
AT4G39910.1	1.692	0.328279	0.38988	0.614851	1.492	0.301327	0.394662	0.666584
AT1G04985.1	1.027	0.2774	0.30995	0.599864	1.806	0.267922	0.411296	0.729935
AT2G43090.1	1.244	0.247913	0.362634	0.712351	1.388	0.219304	0.406391	0.790953
AT3G63110.1	1.126	0.218542	0.313093	0.701188	1.012	0.174627	0.296909	0.762526
AT2G43090.2	1.254	0.254913	0.366166	0.705322	1.33	0.203957	0.388863	0.800311
AT5G43310.3	0.832	0.0252121	0.122869	0.962121	0.448	0.0407273	0.128791	0.909091
AT5G43310.2	0.835	0.0253182	0.12336	0.962108	0.449	0.0408182	0.129078	0.909091
AT5G43310.4	0.842	0.0255152	0.124345	0.962121	0.452	0.0410909	0.129941	0.909091
AT5G20910.1	1.267	0.197598	0.352637	0.78183	1.51	0.188207	0.350392	0.793663
AT3G13845.1	1.221	0.243612	0.370841	0.728406	1.242	0.299061	0.377749	0.651997
AT1G56423.1	0.976	0.11759	0.234777	0.813054	0.389	0.054859	0.135391	0.858974
AT5G40580.3	1.317	0.249327	0.379807	0.730049	1.431	0.214218	0.358037	0.754383
AT4G14490.1	NA	NA	NA	NA	NA	NA	NA	NA
AT5G43850.1	1.623	0.2318	0.369801	0.706098	1.557	0.26644	0.409526	0.717418
AT5G61450.1	1.082	0.258737	0.390545	0.722325	1.069	0.191	0.311179	0.753782
AT2G05790.1	1.163	0.104091	0.246523	0.863065	1.456	0.113462	0.270129	0.858961
AT5G27760.1	0.84	0.101346	0.224453	0.845205	0.774	0.0468462	0.158411	0.92434
AT4G16515.1	1.336	0.165288	0.323089	0.809423	1.183	0.207164	0.357042	0.766437
AT4G17720.1	1.091	0.122541	0.272546	0.846893	0.914	0.0948784	0.20943	0.837844
AT4G20440.3	1.489	0.349116	0.389266	0.598065	1.539	0.281362	0.404658	0.702098
AT4G20440.2	1.448	0.346015	0.383466	0.595774	1.528	0.291545	0.406111	0.689152
AT5G49820.1	0.981	0.206846	0.322742	0.73824	1.357	0.184585	0.349659	0.80141
AT5G43870.1	0.648	0.180968	0.244908	0.672946	0.973	0.0663226	0.214538	0.92061
AT5G50665.2	1.085	0.238839	0.347926	0.713389	0.97	0.257032	0.296057	0.60598
AT1G16700.1	0.85	0.0981098	0.222487	0.853363	1.044	0.156695	0.272082	0.766394
AT4G32940.1	0.718	0.0961864	0.179151	0.794642	1.031	0.135729	0.275959	0.822669
AT2G37420.1	0.808	0.0445	0.156451	0.928415	0.551	0.0430469	0.147871	0.921875
AT1G06220.1	1.379	0.271067	0.384908	0.701186	1.406	0.241533	0.373762	0.73129
AT3G01680.1	1.034	0.329051	0.339091	0.559271	1.091	0.354513	0.403801	0.599628
AT3G46540.1	0.582	0.0800581	0.168317	0.826858	0.632	0.0589884	0.13466	0.846449
AT2G16600.2	0.899	0.33475	0.264084	0.447058	0.975	0.296175	0.311029	0.573438
AT2G16600.1	0.88	0.31515	0.254351	0.456878	0.966	0.28765	0.304954	0.57762
AT1G13450.3	NA	NA	NA	NA	NA	NA	NA	NA
AT1G13450.2	0.884	0.0530315	0.161267	0.9117	1.276	0.0668504	0.210946	0.916211
AT1G13450.1	0.877	0.155853	0.254038	0.752578	1.255	0.209588	0.343331	0.754181
AT1G72750.1	1.293	0.263008	0.392204	0.723534	1.336	0.233016	0.381715	0.757468
AT5G19310.1	0.692	0.0682278	0.184649	0.88779	0.624	0.10062	0.18204	0.771851
AT1G19835.2	1.355	0.116494	0.289854	0.873433	1.207	0.134165	0.279934	0.829159
AT1G73200.1	1.56	0.204417	0.393426	0.805782	1.596	0.157431	0.325905	0.82314
AT1G04400.2	1.111	0.160956	0.28436	0.77893	1.476	0.136412	0.270222	0.809814
AT1G19835.1	1.358	0.159155	0.280644	0.766047	1.209	0.131267	0.258826	0.810598
AT5G58575.1	0.847	0.145515	0.235788	0.738467	0.893	0.109382	0.219935	0.817199
AT1G17330.1	1.192	0.342545	0.36859	0.583489	1.545	0.35503	0.40211	0.596092
AT3G45620.1	1.249	0.256429	0.407952	0.742181	1.277	0.196	0.403504	0.824552
AT3G45620.2	1.084	0.167769	0.31674	0.80018	1.184	0.119192	0.306761	0.877516
AT5G63870.2	0.836	0.1008	0.211316	0.829949	0.898	0.09345	0.199244	0.827457
AT5G63870.3	0.889	0.107	0.224732	0.830426	0.963	0.100233	0.213718	0.82748
AT5G63870.1	0.658	0.0447647	0.13536	0.909725	0.608	0.0539608	0.152151	0.895121
AT1G03360.1	1.206	0.331481	0.381886	0.612648	1.221	0.243731	0.324929	0.673553
AT1G21120.1	1.1	0.219205	0.326671	0.715173	1.488	0.202771	0.445531	0.838928
AT2G36910.1	1.406	0.391394	0.419156	0.578734	1.042	0.252064	0.293249	0.618298
AT5G05580.1	1.373	0.288089	0.378183	0.671209	1.705	0.302821	0.384564	0.647716
AT1G43860.1	1.431	0.30417	0.40025	0.661896	1.649	0.293681	0.433595	0.714757
AT4G32600.1	2.045	0.258711	0.423773	0.745933	1.912	0.242329	0.37528	0.720695
AT5G62650.1	0.879	0.232806	0.281794	0.626263	1.143	0.198161	0.345944	0.774488
AT1G19570.2	1.131	0.153734	0.254268	0.752247	0.657	0.171797	0.232364	0.682911
AT1G19570.1	1.139	0.153922	0.255474	0.753596	0.673	0.176469	0.237617	0.681122
AT2G42500.2	1.612	0.33739	0.431244	0.658687	1.666	0.32086	0.442669	0.689788
AT2G42740.1	1.048	0.205576	0.32227	0.738484	1.323	0.199879	0.350929	0.774344
AT2G46400.1	1.331	0.182	0.340567	0.797036	0.945	0.104696	0.214975	0.820643
AT3G16240.1	1.488	0.323613	0.410504	0.655461	1.549	0.278025	0.39773	0.704494
AT2G39940.1	0.494	0.0400541	0.134842	0.918919	0.45	0.0202703	0.0933313	0.954955
AT1G49760.2	1.429	0.229683	0.317356	0.68184	1.355	0.254917	0.354994	0.695716
AT1G49760.1	1.429	0.233932	0.318581	0.6758	1.359	0.260746	0.357724	0.689723
AT2G32580.2	1.519	0.142195	0.297701	0.826905	1.51	0.138793	0.277107	0.816141
AT2G32580.1	1.386	0.221204	0.341016	0.726806	1.381	0.222454	0.330956	0.71962
AT3G16770.1	1.192	0.141187	0.286627	0.824476	1.12	0.0958933	0.227063	0.859729
AT5G17650.1	1.771	0.390393	0.485237	0.645634	1.535	0.404893	0.45075	0.598078
AT2G05380.2	0.996	0.486389	0.386576	0.439945	1.455	0.446778	0.48445	0.586753
AT2G05380.1	0.934	0.454222	0.36332	0.443792	1.396	0.413167	0.453588	0.591748
AT3G21175.3	1.002	0.0866465	0.217915	0.875375	1.236	0.0964949	0.261814	0.89149
AT3G13060.1	0.468	0.052	0.147078	0.888889	0.421	0.0588889	0.137353	0.854612
AT3G13060.2	0.443	0.0492222	0.139221	0.888889	0.404	0.0572222	0.13266	0.852967
AT1G33520.1	0.592	0.131971	0.196474	0.7195	0.569	0.103029	0.181522	0.780334
AT2G43060.1	0.781	0.140452	0.214607	0.720175	0.637	0.0850476	0.17	0.81171
AT4G17270.1	1.72	0.305745	0.413828	0.677787	1.836	0.344797	0.387264	0.599457
AT1G18265.1	0	0	0	NA	0	0	0	NA
AT5G35200.1	0.603	0.0465745	0.155281	0.921396	0.638	0.0309149	0.120147	0.941259
AT2G28290.2	0.465	0.0379592	0.127319	0.918367	0.419	0.0342041	0.114724	0.918367
AT1G70190.1	1.118	0.1782	0.318356	0.783582	1.003	0.237486	0.32032	0.68029
AT5G08170.1	1.492	0.2693	0.436889	0.745344	1.232	0.1317	0.291038	0.841635
AT1G70190.2	1.096	0.177257	0.312933	0.779819	0.967	0.229086	0.308835	0.680084
AT1G22700.2	1	0.160296	0.244614	0.726955	0.842	0.127	0.223721	0.777756
AT1G75840.1	1.112	0.209624	0.309097	0.714988	1.025	0.139404	0.245243	0.777159
AT4G13150.1	1.111	0.201343	0.361764	0.785347	1.286	0.288	0.372221	0.657608
AT3G07570.1	1.29	0.189188	0.364577	0.810169	1.333	0.168063	0.297303	0.77276
AT2G31610.1	1.528	0.28019	0.395876	0.689857	1.797	0.222214	0.377471	0.752376
AT2G46225.1	1.199	0.176481	0.297312	0.758645	1.069	0.164865	0.289849	0.774629
AT2G20060.1	0.989	0.208203	0.295081	0.700878	1.074	0.176219	0.307558	0.775448
AT5G49015.1	1.345	0.26206	0.396949	0.728157	1.876	0.232759	0.460067	0.817928
AT3G26890.1	1.183	0.1333	0.245592	0.786222	1.154	0.136075	0.26913	0.811003
AT4G14500.1	0.852	0.0526296	0.16632	0.91651	0.383	0.0425556	0.120365	0.888889
AT3G26890.3	1.193	0.122203	0.240644	0.808019	1.163	0.115373	0.253314	0.839869
AT3G26890.2	1.185	0.141444	0.251967	0.775773	1.155	0.130285	0.265557	0.819786
AT3G26890.5	1.165	0.172856	0.270686	0.7304	1.133	0.174685	0.291333	0.753747
AT3G26890.4	1.167	0.152231	0.264547	0.769833	1.136	0.160994	0.28509	0.775219
AT3G26890.6	1.224	0.108127	0.226855	0.82479	1.187	0.105677	0.240549	0.847844
AT4G28300.1	0.974	0.129125	0.239898	0.79682	0.902	0.159029	0.241699	0.722727
AT4G28300.2	1.187	0.104028	0.22559	0.840391	1.189	0.126669	0.252333	0.817209
AT1G23860.1	1.669	0.437	0.420632	0.528739	1.389	0.328978	0.369631	0.599892
AT2G46610.1	0.716	0.0883448	0.212516	0.862594	0.754	0.0588276	0.178239	0.90779
AT1G23860.3	1.773	0.302662	0.41838	0.687591	1.498	0.23307	0.360089	0.732245
AT1G23860.2	1.151	0.124949	0.301384	0.868154	0.863	0.113077	0.230557	0.824257
AT3G07590.1	1.306	0.241625	0.394588	0.750424	0.885	0.0845	0.232614	0.893203
AT5G61920.2	0.64	0.0733165	0.178584	0.864606	0.919	0.0483544	0.149861	0.907018
AT3G63030.1	1.495	0.407231	0.473656	0.616954	1.085	0.430115	0.445439	0.564033
AT5G58950.1	1.391	0.285672	0.367425	0.660268	1.519	0.269737	0.372334	0.685475
AT5G22875.2	1.262	0.255875	0.391757	0.731942	1.692	0.275562	0.463965	0.764367
AT2G25840.1	1.158	0.164596	0.288563	0.774225	1.388	0.20466	0.322058	0.730646
AT1G45230.1	0.365	0.0602558	0.123914	0.824141	0.511	0.0387442	0.11241	0.9017
AT1G45230.2	0.364	0.0516389	0.11203	0.840192	0.509	0.0371944	0.111891	0.908866
AT4G28140.1	1.483	0.28403	0.422122	0.717452	0.46	0.126821	0.150375	0.629114
AT2G35820.1	0.766	0.3375	0.310061	0.507407	0.949	0.2192	0.306082	0.685584
AT4G32660.1	1.703	0.198781	0.342927	0.764004	1.373	0.153193	0.280426	0.787274
AT4G32660.2	1.724	0.201518	0.347231	0.763582	1.392	0.155526	0.284264	0.786781
AT4G32660.3	0.988	0.0818052	0.216523	0.88317	1.318	0.0758571	0.227701	0.906574
AT5G20885.1	0.872	0.179327	0.312054	0.774725	1.073	0.116163	0.246679	0.83292
AT1G79150.1	1.225	0.198558	0.34583	0.776131	0.855	0.140535	0.2577	0.793461
AT5G14260.1	1.175	0.23369	0.322947	0.689496	1.083	0.22969	0.310791	0.679984
AT5G14260.3	1.162	0.243287	0.322725	0.672527	1.068	0.23745	0.310299	0.665393
AT5G14260.2	1.15	0.2404	0.319656	0.673599	1.051	0.2329	0.305288	0.666662
AT1G72770.1	1.026	0.106453	0.217848	0.815279	0.498	0.0936533	0.120741	0.659823
AT1G52290.1	1.625	0.292623	0.417167	0.699815	2.619	0.549698	0.745116	0.679905
AT5G19510.1	1.406	0.222533	0.302253	0.671992	0.982	0.1996	0.27494	0.68735
AT1G18370.1	0.788	0.0652553	0.19476	0.905729	0.823	0.0681489	0.2034	0.905733
AT1G22230.1	0.764	0.0681208	0.171029	0.866149	0.949	0.0856846	0.208118	0.862822
AT1G30470.3	1.29	0.161871	0.279268	0.765267	1.388	0.161634	0.292676	0.77895
AT5G59450.1	0.917	0.0791447	0.19874	0.86848	0.827	0.0788289	0.190034	0.865335
AT1G77750.1	0.868	0.175263	0.253361	0.692208	0.832	0.100368	0.241504	0.865068
AT1G22800.1	0.951	0.211094	0.287315	0.672543	0.887	0.113113	0.236646	0.831196
AT2G07360.1	1.185	0.195523	0.285505	0.691506	0.832	0.2035	0.28646	0.69818
AT1G30630.1	1.218	0.328488	0.37328	0.608645	1.188	0.366977	0.367464	0.552793
AT1G26670.1	1.372	0.279798	0.392279	0.698837	1.105	0.237061	0.332848	0.698665
AT4G37870.1	1.149	0.198946	0.297686	0.714194	1.005	0.167411	0.277245	0.758977
AT5G65950.1	0.797	0.0319897	0.141063	0.954314	0.757	0.0144227	0.0891432	0.976633
AT5G14240.1	1.511	0.286872	0.441019	0.733382	1.145	0.220385	0.31953	0.707137
AT2G43160.4	1.104	0.203309	0.282328	0.689526	1.444	0.224785	0.324666	0.703171
AT1G71720.1	0.93	0.333923	0.344309	0.564528	0.68	0.242231	0.211703	0.487041
AT2G39450.1	1.066	0.113224	0.250276	0.843814	0.88	0.0973276	0.208346	0.833679
AT5G19350.2	0.712	0.0983026	0.17311	0.768781	0.755	0.106711	0.19409	0.783993
AT4G16660.1	1.171	0.25193	0.333764	0.67073	0.99	0.243338	0.279752	0.609259
AT5G19350.1	0.679	0.0936316	0.164874	0.768757	0.714	0.100934	0.183734	0.784316
AT4G08920.1	0.914	0.171417	0.26873	0.739143	1.194	0.167267	0.322669	0.809669
AT2G16660.1	1.3	0.262682	0.340592	0.652228	0.845	0.209318	0.306034	0.712003
AT3G46060.2	0.873	0.0414301	0.137645	0.920841	0.919	0.0539462	0.167203	0.913282
AT3G46060.3	0.851	0.0522881	0.162874	0.914232	0.9	0.0694915	0.18654	0.889748
AT4G24740.2	1.05	0.133398	0.233053	0.775433	1.039	0.159667	0.245214	0.729648
AT3G46060.1	1.179	0.138651	0.241211	0.767427	1.175	0.169802	0.276666	0.74899
AT2G43160.1	1.093	0.20198	0.279613	0.688153	1.42	0.221181	0.319421	0.703132
AT5G52040.4	1.405	0.178387	0.272835	0.723566	1.22	0.159108	0.262092	0.753243
AT5G56250.2	1.034	0.0646509	0.196861	0.90842	0.981	0.0887736	0.221336	0.868566
AT3G52910.1	0.881	0.0207604	0.11872	0.972147	1.061	0.0221042	0.151539	0.979167
AT5G51570.1	1.093	0.124904	0.284626	0.855276	0.789	0.0706346	0.162991	0.853049
AT5G23100.1	0.866	0.120014	0.223089	0.786541	0.513	0.0496197	0.150222	0.90304
[truncated: 12,993 more rows]

## Sheet: D3
D3 Shoot Control vs. Shoot Salt Intra-Tissue Contrast Derived Statistics, CDS
transcript	shoot_control_CDS_max	shoot_control_CDS_average	shoot_control_CDS_std	shoot_control_CDS_gini	shoot_salt_CDS_max	shoot_salt_CDS_average	shoot_salt_CDS_std	shoot_salt_CDS_gini
AT2G14880.1	1.503	0.425215	0.372175	0.493683	1.8	0.423274	0.441471	0.569253
AT3G19760.1	1.459	0.350788	0.360165	0.561494	1.842	0.327474	0.370331	0.6022
AT1G62780.1	1.591	0.363033	0.353494	0.534225	1.373	0.373142	0.342634	0.513037
AT2G12280.1	1.563	0.209688	0.380589	0.788746	1.53	0.189277	0.350527	0.794692
AT1G68050.1	1.758	0.318765	0.37417	0.614924	2.043	0.33835	0.447648	0.669631
AT2G22190.1	1.456	0.251462	0.378237	0.723186	1.529	0.243604	0.354276	0.707195
AT5G62000.3	1.778	0.345969	0.357815	0.56146	1.638	0.33663	0.366334	0.58712
AT1G08650.2	1.686	0.249788	0.370355	0.716939	1.118	0.179933	0.251551	0.694215
AT3G11130.1	2.035	0.312626	0.376307	0.627843	1.852	0.301929	0.369679	0.6365
AT3G09860.1	1.586	0.384255	0.325613	0.468917	1.428	0.410315	0.380028	0.514868
AT1G04440.1	1.847	0.303085	0.38961	0.658892	1.942	0.296725	0.398992	0.674966
AT5G13090.1	2.642	0.240964	0.410736	0.760501	3.049	0.287921	0.526901	0.78612
AT4G30810.1	1.811	0.294586	0.386816	0.665052	1.584	0.261839	0.35802	0.684105
AT4G32560.1	1.587	0.295844	0.3808	0.661196	1.761	0.293837	0.395418	0.678171
AT3G10680.1	1.597	0.293054	0.36756	0.648059	1.502	0.304305	0.388219	0.656654
AT3G60530.1	1.728	0.311369	0.386282	0.644904	1.594	0.295544	0.364182	0.639865
AT1G31730.1	1.751	0.292618	0.369744	0.649057	1.895	0.29078	0.368603	0.651793
AT5G19540.1	1.537	0.318274	0.36716	0.612341	1.682	0.315458	0.373904	0.624446
AT1G11750.1	1.762	0.370141	0.364513	0.538232	1.744	0.411572	0.398611	0.535711
AT3G11500.1	1.542	0.367078	0.379728	0.564756	1.501	0.386739	0.393082	0.557666
AT5G52780.1	1.466	0.354294	0.364186	0.561025	1.578	0.375216	0.40368	0.58279
AT5G50020.2	1.996	0.302578	0.376144	0.643982	1.674	0.29209	0.36661	0.648468
AT1G72370.2	1.66	0.417865	0.344568	0.462932	1.602	0.39449	0.371763	0.523553
AT1G72370.1	1.644	0.434173	0.333653	0.432547	1.588	0.41132	0.37118	0.504617
AT1G18490.1	1.763	0.343022	0.449659	0.667604	1.88	0.325886	0.425839	0.663932
AT5G19550.1	1.443	0.326451	0.381917	0.619621	1.426	0.297729	0.343591	0.611573
AT3G19930.1	1.791	0.271835	0.375666	0.687403	2.158	0.304114	0.436437	0.700581
AT4G23740.1	1.777	0.281566	0.39079	0.68937	2.099	0.27659	0.379557	0.680153
AT1G67750.1	2.156	0.249336	0.405108	0.745109	1.574	0.228702	0.319864	0.688982
AT3G23900.1	1.99	0.287067	0.377517	0.665061	2.22	0.307416	0.418962	0.680586
AT1G73940.1	1.331	0.350411	0.388286	0.598471	1.783	0.337119	0.422979	0.6497
AT5G47540.1	1.752	0.274358	0.364248	0.66735	1.694	0.253196	0.349491	0.686511
AT2G02370.2	2.47	0.192773	0.412143	0.833248	2.172	0.20606	0.407276	0.808005
AT2G02370.1	2.464	0.192666	0.41149	0.832951	2.156	0.204701	0.404488	0.807925
AT1G55530.1	1.897	0.283499	0.391077	0.686655	1.35	0.268101	0.33509	0.646722
AT2G43210.1	2.064	0.291312	0.389409	0.66978	2.027	0.2944	0.375789	0.652893
AT1G52720.1	1.753	0.35176	0.412689	0.617589	1.852	0.328694	0.438122	0.676088
AT3G09720.1	1.895	0.264143	0.403471	0.7222	2.138	0.229819	0.373639	0.74502
AT1G56000.1	1.961	0.306856	0.399569	0.661291	1.585	0.269413	0.381194	0.698465
AT5G22070.1	1.594	0.245432	0.367403	0.717085	1.45	0.215391	0.333282	0.731242
AT1G17080.1	1.369	0.335479	0.358709	0.577206	1.198	0.30331	0.338574	0.598848
AT1G74670.1	1.446	0.344393	0.380399	0.592435	1.376	0.310685	0.356695	0.613494
AT4G23760.1	1.948	0.261669	0.42427	0.744066	1.967	0.276478	0.41244	0.71312
AT3G59940.1	1.491	0.380074	0.366617	0.532743	1.645	0.33434	0.354765	0.575808
AT5G61412.1	1.407	0.197132	0.331179	0.753519	1.32	0.181519	0.30687	0.764793
AT1G24490.2	1.881	0.294053	0.380516	0.65943	1.683	0.28327	0.373942	0.66838
AT5G08120.1	1.616	0.353176	0.389776	0.592093	1.887	0.354042	0.398229	0.598869
AT3G49670.1	1.887	0.274723	0.389722	0.694549	2.358	0.268527	0.448174	0.755795
AT3G54110.1	1.967	0.360392	0.392218	0.581037	1.592	0.365686	0.419972	0.613013
AT4G24760.1	1.713	0.292255	0.403497	0.687073	1.457	0.251921	0.34207	0.678683
AT1G22360.1	1.752	0.338712	0.360257	0.575559	1.775	0.356238	0.408347	0.611154
AT1G22360.2	1.773	0.315057	0.359338	0.606083	1.786	0.338351	0.40628	0.630896
AT4G37190.1	1.966	0.257902	0.382133	0.710992	2.155	0.2457	0.395635	0.743325
AT5G22050.2	2.101	0.296961	0.399846	0.674357	2.167	0.313524	0.473709	0.721724
AT5G22050.1	2.129	0.257705	0.393366	0.724959	2.174	0.280333	0.468887	0.760183
AT4G37190.2	1.956	0.260803	0.385276	0.709787	2.108	0.247652	0.392679	0.737428
AT3G54130.1	1.686	0.224475	0.36601	0.748265	1.371	0.169721	0.279561	0.754429
AT5G49460.1	1.942	0.295817	0.404575	0.680425	1.876	0.287093	0.43613	0.724843
AT3G47965.1	0.969	0.169	0.281491	0.754885	0.959	0.167552	0.269522	0.74475
AT3G13120.1	1.464	0.41913	0.335632	0.448262	2.037	0.479567	0.42616	0.495657
AT2G26190.1	1.869	0.363331	0.372683	0.555921	2.431	0.427089	0.501707	0.619143
AT4G32330.3	1.502	0.343077	0.356437	0.567629	1.638	0.383075	0.398887	0.569366
AT1G74920.2	1.69	0.323816	0.352505	0.581232	1.71	0.32419	0.358739	0.591269
AT4G32330.1	1.555	0.366181	0.366812	0.550872	1.623	0.397015	0.403529	0.559481
AT4G24275.1	2.106	0.323792	0.393457	0.626813	1.739	0.372703	0.466	0.646491
AT1G75800.1	1.747	0.385192	0.373049	0.533412	2.045	0.419061	0.445013	0.578467
AT4G14230.1	1.771	0.330887	0.376716	0.602401	1.903	0.387713	0.454338	0.620671
AT3G26115.1	2.197	0.237753	0.388151	0.743314	2.972	0.250091	0.493342	0.810547
AT2G03680.1	1.638	0.406937	0.378248	0.515261	1.59	0.408031	0.401898	0.544096
AT1G44780.1	1.863	0.339911	0.378158	0.595696	1.828	0.353819	0.394381	0.596061
AT2G20020.1	1.626	0.310766	0.357285	0.610195	1.575	0.304231	0.346081	0.607559
AT5G15700.2	1.709	0.252143	0.384612	0.725593	1.935	0.231817	0.370644	0.743718
AT1G33060.2	2.031	0.216863	0.380471	0.776871	2.163	0.223564	0.408085	0.788633
AT2G18050.1	1.57	0.311545	0.374532	0.631045	0.926	0.216805	0.220684	0.557962
AT2G18050.2	1.538	0.292383	0.357001	0.635721	0.918	0.206668	0.209077	0.555015
AT1G75750.1	1.372	0.366014	0.373004	0.560082	1.456	0.333925	0.333525	0.5487
AT1G75750.2	1.396	0.360432	0.374151	0.568414	1.46	0.31624	0.324899	0.560908
AT3G22150.1	2.072	0.299716	0.398898	0.669007	2.336	0.302679	0.431259	0.69594
AT2G01590.1	1.982	0.390728	0.445174	0.596937	1.891	0.356989	0.464399	0.663382
AT5G21990.1	1.857	0.309542	0.39223	0.652351	1.999	0.26919	0.351843	0.661407
AT1G66660.2	2.348	0.280038	0.397404	0.687829	2.249	0.253083	0.370524	0.704153
AT1G14740.1	1.886	0.335364	0.373214	0.592362	2.297	0.357903	0.434224	0.634272
AT5G42150.1	1.712	0.285781	0.397688	0.693315	1.425	0.271735	0.371403	0.685354
AT2G34200.1	1.84	0.320122	0.369132	0.608155	1.37	0.312799	0.367677	0.623057
AT2G33120.2	1.799	0.337889	0.402376	0.625546	1.582	0.307287	0.376964	0.640925
AT2G33120.3	1.239	0.227919	0.329064	0.708947	1.318	0.212274	0.326804	0.733173
AT2G33120.1	1.778	0.346015	0.3972	0.609263	1.563	0.324025	0.367076	0.605391
AT3G53270.3	1.592	0.273337	0.397318	0.711274	1.763	0.280188	0.420807	0.722203
AT1G54210.1	1.332	0.218688	0.346408	0.733911	1.502	0.194648	0.325943	0.747274
AT1G54210.2	1.301	0.181159	0.352379	0.808696	1.413	0.135246	0.327134	0.866838
AT5G41970.1	1.665	0.327395	0.381792	0.617378	1.644	0.30005	0.386173	0.660394
AT4G22240.1	1.57	0.356287	0.376064	0.572772	1.19	0.272383	0.276716	0.555703
AT4G17560.1	1.767	0.453572	0.367707	0.456258	1.579	0.456299	0.417919	0.512824
AT1G18150.2	1.626	0.260316	0.374842	0.703305	2.326	0.270432	0.419621	0.731728
AT5G59000.1	1.767	0.338667	0.434836	0.660068	1.548	0.379913	0.419933	0.597323
AT3G22970.2	1.921	0.329357	0.432594	0.664003	2.058	0.30798	0.414313	0.675974
AT5G58510.1	2.822	0.247379	0.396527	0.737873	1.986	0.215447	0.360853	0.755918
AT1G06850.2	1.828	0.214802	0.38166	0.776582	1.697	0.207574	0.374015	0.782704
AT2G03550.1	2.04	0.294899	0.379411	0.658209	1.874	0.301906	0.388036	0.653604
AT5G01650.1	1.238	0.382281	0.35655	0.519169	1.741	0.338814	0.39906	0.618842
AT3G13120.2	1.483	0.421857	0.342132	0.453075	2.069	0.491215	0.444128	0.503523
AT4G22250.1	1.64	0.251437	0.373885	0.711355	1.479	0.261595	0.352144	0.677203
AT5G65960.1	1.757	0.355935	0.383505	0.583249	1.564	0.333312	0.35785	0.580041
AT2G35840.3	1.763	0.332859	0.415577	0.647006	1.502	0.296494	0.339657	0.60871
AT2G35840.2	1.631	0.326899	0.385982	0.62278	1.362	0.284425	0.309783	0.587805
AT2G35840.1	1.611	0.3226	0.381286	0.623197	1.346	0.281945	0.30645	0.586916
AT2G33810.1	1.855	0.483062	0.433146	0.496441	2.55	0.50261	0.508319	0.548375
AT5G36290.1	1.718	0.285477	0.388616	0.681574	1.957	0.299242	0.412964	0.681441
AT5G36290.2	1.671	0.276753	0.377867	0.682785	1.839	0.277893	0.387764	0.686155
AT4G30260.1	1.712	0.314221	0.393702	0.645975	1.535	0.289959	0.352322	0.633359
AT4G16180.2	1.912	0.287389	0.378827	0.668097	1.939	0.275874	0.365452	0.671076
AT4G16180.1	1.51	0.27066	0.404121	0.71994	1.422	0.257112	0.379863	0.717103
AT4G38740.1	1.375	0.435738	0.358433	0.465218	2.191	0.416133	0.401107	0.528673
AT3G20410.1	1.609	0.315147	0.356664	0.604219	1.604	0.361985	0.410571	0.606525
AT2G36000.1	1.844	0.351111	0.375467	0.572572	1.99	0.371244	0.433046	0.614678
AT5G37510.1	1.768	0.319346	0.364835	0.607763	1.549	0.310554	0.3615	0.616223
AT5G37510.2	1.756	0.30674	0.362375	0.622547	1.541	0.299766	0.357827	0.627243
AT1G51110.1	1.988	0.345931	0.374759	0.57815	2.291	0.361886	0.435651	0.630976
AT5G65940.2	1.871	0.285171	0.367642	0.65967	1.616	0.255361	0.365281	0.701182
AT5G65940.3	1.818	0.280425	0.364888	0.664204	1.573	0.254069	0.354737	0.691229
AT1G17680.1	1.941	0.254291	0.381709	0.718029	1.938	0.240358	0.368963	0.727191
AT5G59410.1	1.612	0.303288	0.416101	0.684089	1.643	0.289599	0.403916	0.687936
AT3G20780.1	2.131	0.261853	0.384977	0.706643	1.977	0.257495	0.370217	0.703221
AT1G21160.1	1.892	0.294119	0.374546	0.652428	1.648	0.271994	0.349492	0.656305
AT5G55960.1	1.775	0.303414	0.393134	0.659021	2.411	0.272021	0.396908	0.708155
AT5G22875.1	1.508	0.315933	0.427512	0.682202	2.221	0.394504	0.5072	0.655283
AT1G05150.1	1.702	0.288274	0.383641	0.673242	2.031	0.30001	0.41296	0.685367
AT5G04440.1	1.878	0.320834	0.369295	0.602575	1.7	0.330892	0.419896	0.654155
AT3G47060.1	1.909	0.300042	0.392399	0.662553	1.674	0.279018	0.359269	0.658767
AT1G65440.1	1.791	0.344144	0.362053	0.568931	1.677	0.327325	0.34357	0.570679
AT3G63500.1	1.976	0.329431	0.373388	0.602712	2.01	0.322686	0.389531	0.630878
AT5G04420.2	1.94	0.284001	0.389314	0.682693	1.871	0.250374	0.349285	0.691189
AT5G04420.3	2.006	0.293479	0.402458	0.682846	1.928	0.257672	0.359703	0.691458
AT5G04420.1	1.963	0.28711	0.393857	0.682984	1.898	0.254388	0.354548	0.690796
AT3G63500.2	1.954	0.320283	0.370356	0.610685	2.008	0.315808	0.387364	0.637442
AT3G46000.1	1.827	0.459184	0.406319	0.491	1.763	0.476811	0.478961	0.553152
AT1G19310.1	1.678	0.2664	0.37243	0.690983	1.279	0.210849	0.332332	0.738703
AT4G31990.3	1.65	0.359627	0.371531	0.561116	1.382	0.330087	0.334076	0.553393
AT4G31990.2	1.591	0.363802	0.359766	0.541658	1.328	0.332115	0.329633	0.545824
AT4G31990.1	1.596	0.361052	0.360984	0.546578	1.33	0.329348	0.329372	0.549059
AT4G32400.1	1.986	0.32057	0.39358	0.63386	1.93	0.302225	0.401758	0.67098
AT3G13460.1	1.726	0.364202	0.351739	0.530768	1.981	0.384201	0.394799	0.561427
AT3G17120.1	1.885	0.331956	0.423088	0.652628	1.455	0.30035	0.363612	0.635343
AT4G01040.1	1.544	0.286015	0.370641	0.661401	1.437	0.259282	0.352054	0.68225
AT4G24830.1	1.7	0.319435	0.378435	0.622525	2.017	0.315604	0.421093	0.672858
AT3G13460.2	1.739	0.363875	0.354052	0.53396	1.99	0.381737	0.396051	0.565639
AT5G42390.1	1.659	0.332154	0.363057	0.588966	1.786	0.32408	0.37872	0.617197
AT1G60260.1	1.616	0.273921	0.374473	0.681707	1.65	0.260076	0.357006	0.683569
AT1G59840.2	1.858	0.334969	0.431001	0.657488	1.871	0.346426	0.442822	0.657285
AT4G04470.1	1.298	0.280103	0.35823	0.657613	1.418	0.285919	0.358083	0.649232
AT3G07790.1	1.554	0.326935	0.370248	0.603324	1.799	0.307571	0.369276	0.627526
AT1G59840.1	1.678	0.302326	0.38899	0.657459	1.876	0.341921	0.442405	0.662288
AT5G46680.1	1.696	0.221059	0.388789	0.775648	1.702	0.215736	0.36856	0.767835
AT1G17455.2	1.679	0.33231	0.435366	0.668797	1.873	0.31406	0.474064	0.723998
AT1G17455.1	1.567	0.307214	0.405321	0.671774	1.832	0.305798	0.463339	0.725503
AT3G18960.1	1.832	0.308873	0.3964	0.654487	1.857	0.310363	0.427436	0.686183
AT3G48200.1	1.779	0.272143	0.377681	0.688463	1.637	0.254637	0.342356	0.676939
AT1G11260.1	1.637	0.36099	0.345936	0.527583	2.463	0.481362	0.545856	0.605198
AT1G64750.2	2.071	0.453476	0.405602	0.489978	1.614	0.464448	0.371413	0.448481
AT1G64750.3	2.119	0.295322	0.42738	0.70504	1.721	0.29527	0.396704	0.675846
AT3G25530.1	1.443	0.384226	0.362275	0.525082	1.618	0.377638	0.390454	0.565566
AT1G64750.1	1.987	0.426781	0.38971	0.49891	1.535	0.440333	0.353175	0.44971
AT3G01480.1	1.585	0.404177	0.365133	0.504708	2.11	0.458344	0.458924	0.551317
AT2G42190.1	1.341	0.445162	0.380059	0.482745	2.091	0.46638	0.361509	0.432756
AT3G01480.2	1.498	0.359454	0.36912	0.561368	2.156	0.399912	0.456267	0.607937
AT3G09440.1	1.651	0.332497	0.37321	0.599991	1.324	0.275156	0.30647	0.596936
AT5G49660.1	1.93	0.244753	0.391461	0.740151	1.967	0.237963	0.379016	0.737744
AT3G09440.2	1.641	0.330311	0.370958	0.600231	1.317	0.273818	0.304801	0.596711
AT5G16680.1	1.716	0.269045	0.365806	0.680002	1.765	0.260722	0.354499	0.679294
AT2G34300.2	2.285	0.301627	0.38316	0.648293	1.858	0.275873	0.329152	0.624606
AT2G34300.1	2.305	0.305492	0.386887	0.647056	1.872	0.278445	0.331816	0.624111
AT1G69840.7	1.575	0.370008	0.38029	0.562247	2.071	0.417122	0.543455	0.665811
AT3G25150.1	1.523	0.339124	0.372884	0.591886	1.762	0.329938	0.380931	0.6131
AT1G21580.1	1.997	0.252059	0.37103	0.712265	2.286	0.246554	0.39255	0.737988
AT3G02790.1	1.268	0.31368	0.363936	0.618846	1.282	0.317506	0.358479	0.602323
AT4G24900.1	2.226	0.228629	0.406697	0.7759	2.172	0.237202	0.38268	0.742915
AT1G48650.1	1.88	0.267724	0.370178	0.684134	2.069	0.26081	0.366323	0.691381
AT4G14920.1	2	0.253301	0.381525	0.720099	2.226	0.241257	0.360522	0.715901
AT1G48650.2	1.934	0.267511	0.375141	0.690028	2.138	0.260986	0.372975	0.697802
AT5G49510.1	1.548	0.307892	0.381744	0.642248	1.393	0.227299	0.33358	0.71215
AT2G22450.1	1.566	0.342977	0.36881	0.580798	1.828	0.355167	0.391421	0.592234
AT5G49510.2	1.587	0.291183	0.3847	0.667952	1.444	0.222974	0.342021	0.729089
AT5G51750.1	1.945	0.292796	0.373208	0.654888	1.931	0.300485	0.399202	0.670387
AT5G17520.1	1.844	0.271373	0.390293	0.701566	1.827	0.235237	0.365342	0.728849
AT2G18960.1	1.48	0.360108	0.355467	0.544208	1.54	0.351282	0.338626	0.534451
AT1G16260.2	1.968	0.283277	0.379223	0.672527	2.176	0.295607	0.449245	0.723598
AT5G02500.1	2.006	0.36648	0.359245	0.533812	1.643	0.351917	0.34939	0.544763
AT1G56460.2	1.869	0.356567	0.38574	0.584022	1.796	0.359327	0.388706	0.583856
AT1G01770.1	1.82	0.259336	0.39017	0.717622	1.846	0.206815	0.35583	0.764144
AT5G25100.1	1.673	0.307816	0.382937	0.644747	1.609	0.292483	0.362755	0.64283
AT5G25100.2	1.701	0.307217	0.389253	0.65285	1.637	0.291689	0.3686	0.651046
AT3G19360.1	1.809	0.255	0.399854	0.735485	2.006	0.274166	0.449949	0.753564
AT2G36060.1	1.727	0.382064	0.425725	0.597781	1.513	0.330309	0.395292	0.629454
AT2G36060.2	1.744	0.374234	0.421495	0.601965	1.522	0.325068	0.404662	0.646762
AT2G36060.3	1.819	0.348941	0.420069	0.629112	1.471	0.328451	0.397944	0.634406
AT1G72170.1	1.653	0.369467	0.419258	0.603779	1.547	0.310241	0.397381	0.651648
AT3G24530.1	1.602	0.297491	0.379118	0.652326	1.839	0.305659	0.40775	0.669856
AT1G07930.1	2.042	0.416954	0.361399	0.479005	1.509	0.42875	0.37713	0.496333
AT1G47250.1	1.769	0.311579	0.374465	0.627234	1.586	0.301127	0.343331	0.607426
AT1G07930.2	2.09	0.409723	0.373974	0.499793	1.586	0.419239	0.386396	0.517066
AT4G09030.1	1.383	0.311671	0.362076	0.615043	1.874	0.291827	0.364375	0.639193
AT5G57200.1	7	0.179751	1.09066	0.974234	7	0.189189	1.13514	0.972973
AT3G51370.2	1.66	0.340906	0.385787	0.603095	1.453	0.288393	0.34957	0.633959
AT3G51370.1	1.799	0.354548	0.385192	0.584235	1.466	0.313843	0.355362	0.604509
AT4G08850.2	1.902	0.299941	0.377446	0.646245	2.158	0.32334	0.425168	0.66535
AT4G08850.1	1.852	0.310604	0.370928	0.623735	2.112	0.335185	0.419886	0.644731
AT4G32010.1	1.973	0.267442	0.399149	0.715447	1.878	0.248966	0.382559	0.727934
AT1G21630.2	1.849	0.287101	0.380724	0.670478	2.3	0.278287	0.374042	0.673918
AT1G73030.1	1.394	0.413615	0.358574	0.48561	1.575	0.383806	0.373406	0.537872
AT1G21630.1	1.819	0.295357	0.3793	0.657436	2.257	0.286958	0.371255	0.658114
AT4G19060.1	1.794	0.296602	0.381923	0.657759	1.699	0.292606	0.348488	0.622039
AT3G25840.2	1.587	0.347799	0.365992	0.569091	1.596	0.339255	0.368674	0.587419
AT3G25840.1	1.79	0.351213	0.368438	0.567764	1.603	0.349532	0.371517	0.577508
AT1G27030.1	1.569	0.315384	0.3835	0.635068	2.537	0.349588	0.470236	0.669947
AT2G20950.3	1.926	0.316695	0.390762	0.637118	1.95	0.323556	0.387838	0.629428
AT2G20950.2	1.905	0.307957	0.391091	0.650248	1.932	0.322681	0.385783	0.627736
AT2G20950.1	1.833	0.319809	0.386676	0.629951	1.853	0.333917	0.377195	0.603097
AT3G06450.2	2.397	0.246622	0.380818	0.725012	2.081	0.234915	0.350082	0.713317
AT3G25150.2	1.555	0.291802	0.371339	0.655504	1.797	0.281941	0.374052	0.672748
AT3G02950.1	1.59	0.371514	0.373999	0.551824	1.734	0.377978	0.370267	0.538514
AT2G21060.1	1.527	0.45639	0.354667	0.438818	1.516	0.453877	0.422658	0.521776
AT5G46920.1	2.235	0.211392	0.398926	0.796357	2.423	0.21045	0.385017	0.785084
AT3G07730.1	1.81	0.235336	0.378766	0.743292	1.239	0.206131	0.299392	0.709156
AT1G33700.2	2.827	0.199458	0.432717	0.835917	2.33	0.214618	0.429065	0.814516
AT3G55500.1	1.568	0.311436	0.382168	0.636418	1.488	0.269742	0.35056	0.660314
AT1G76160.1	1.583	0.330315	0.349855	0.572322	1.663	0.364364	0.384414	0.573798
AT4G19520.1	2.351	0.211206	0.380649	0.78295	2.518	0.215861	0.395838	0.786449
AT4G21190.1	1.857	0.383722	0.385851	0.551908	1.787	0.384038	0.387112	0.550393
AT5G62900.1	1.689	0.319299	0.388326	0.636111	1.653	0.337192	0.395208	0.619915
AT1G58030.1	1.806	0.290144	0.380493	0.662046	1.952	0.251637	0.36424	0.702523
AT4G19990.1	2.189	0.244584	0.39488	0.743487	1.677	0.226347	0.361882	0.741248
AT5G11990.1	1.535	0.237929	0.363567	0.726063	1.706	0.248199	0.402243	0.74635
AT4G19990.2	2.135	0.233468	0.376417	0.742398	1.651	0.215356	0.348854	0.745877
AT3G27100.1	1.817	0.293829	0.408767	0.686625	1.763	0.352201	0.452151	0.660512
AT3G27100.2	1.918	0.222719	0.40007	0.782561	1.86	0.266665	0.438308	0.756215
AT1G51450.1	1.931	0.288718	0.401104	0.686188	1.441	0.252509	0.350547	0.689843
AT1G29470.1	1.615	0.388198	0.353343	0.505292	1.547	0.40098	0.369965	0.516412
AT5G03420.1	1.637	0.283814	0.371114	0.666259	1.631	0.298366	0.382792	0.659296
AT1G19880.1	1.915	0.348248	0.38087	0.584229	1.773	0.345234	0.394529	0.608645
AT1G64500.1	1.693	0.298568	0.374463	0.646746	1.448	0.247988	0.29675	0.624987
AT2G01060.1	1.439	0.312385	0.356944	0.608458	1.588	0.271142	0.35057	0.658034
AT4G29870.1	1.854	0.294058	0.401399	0.676443	1.662	0.25577	0.373392	0.7077
AT5G67570.1	1.674	0.300502	0.368586	0.636576	1.908	0.309497	0.404934	0.665304
AT5G01390.4	1.711	0.233952	0.375248	0.741713	1.742	0.1924	0.330275	0.764527
AT5G01390.3	1.739	0.211714	0.370378	0.773322	1.66	0.1739	0.30717	0.773625
AT5G59180.1	1.414	0.234835	0.36642	0.735216	1.63	0.196248	0.31737	0.743448
AT1G58684.1	1.618	0.429317	0.352424	0.463329	1.537	0.402799	0.378571	0.524334
AT5G03905.1	1.364	0.210763	0.309915	0.70102	1.274	0.202777	0.329286	0.746558
AT5G15610.2	1.903	0.303607	0.383167	0.647977	1.56	0.305825	0.377499	0.642028
AT5G15610.1	2.002	0.287871	0.386333	0.671681	1.573	0.283991	0.37931	0.674393
AT1G80950.1	1.589	0.319746	0.391131	0.639677	1.455	0.277797	0.338038	0.635199
AT4G33565.1	2.228	0.259115	0.412383	0.737987	1.729	0.229665	0.368	0.738056
AT2G22970.1	1.891	0.258156	0.394229	0.725075	2.296	0.260986	0.441477	0.759323
AT5G50110.1	1.557	0.262952	0.374265	0.699324	1.475	0.250336	0.347242	0.690591
AT1G65320.1	1.817	0.283126	0.41199	0.706998	1.99	0.284365	0.413872	0.704526
AT1G13170.1	1.929	0.278518	0.393793	0.69367	1.652	0.248863	0.338159	0.680054
AT1G13170.2	1.987	0.276708	0.401111	0.703223	1.709	0.246936	0.347436	0.694572
AT3G51430.1	2.064	0.269469	0.382735	0.696522	1.573	0.244679	0.314688	0.657768
AT1G14010.1	1.529	0.396796	0.377506	0.526631	1.62	0.35488	0.356925	0.550506
AT5G42780.1	1.673	0.331718	0.386788	0.61651	1.633	0.283354	0.346567	0.635646
AT1G28580.2	1.613	0.332974	0.408936	0.640235	1.773	0.335256	0.42328	0.650221
AT1G28580.1	1.547	0.305563	0.383689	0.649965	1.688	0.289668	0.38997	0.67712
AT1G31800.1	1.676	0.309512	0.363956	0.620269	1.677	0.318156	0.385086	0.633624
AT5G16110.1	1.888	0.331183	0.422175	0.653929	1.744	0.31028	0.418135	0.678932
AT5G55990.1	2.018	0.382181	0.418825	0.586034	1.978	0.415441	0.476623	0.612236
AT3G52220.1	1.962	0.415305	0.372028	0.495513	1.498	0.412324	0.370412	0.505304
AT5G45100.2	2.148	0.340046	0.424474	0.645385	1.664	0.318103	0.389088	0.637731
AT4G13200.1	1.682	0.337587	0.374347	0.592037	1.776	0.341873	0.399522	0.612083
AT3G56120.1	1.808	0.254244	0.377658	0.715183	1.701	0.236894	0.392454	0.755009
AT5G44020.1	1.709	0.414183	0.369163	0.496989	2.347	0.500383	0.49604	0.543886
AT3G10350.2	1.522	0.263813	0.368511	0.694719	1.585	0.251778	0.371211	0.715294
AT1G06360.1	1.493	0.33032	0.372932	0.603886	1.511	0.298771	0.352206	0.622371
AT3G53560.1	1.785	0.337718	0.371926	0.58973	1.798	0.358581	0.415342	0.612419
AT1G21650.1	1.967	0.274479	0.386041	0.692394	1.618	0.250311	0.352489	0.69506
AT1G21650.2	1.963	0.275971	0.384109	0.687738	1.621	0.254148	0.352236	0.688186
AT1G21650.3	2.077	0.243744	0.377792	0.729595	1.708	0.22308	0.341376	0.725823
AT1G52980.1	1.848	0.349927	0.370455	0.572315	1.644	0.341841	0.349156	0.559341
AT1G30330.1	2.106	0.269632	0.385859	0.698253	1.999	0.268862	0.380925	0.696107
AT5G44000.1	1.696	0.26255	0.378706	0.705498	2.052	0.26053	0.397261	0.726461
AT1G30330.2	2.106	0.270919	0.38589	0.696301	1.995	0.26973	0.380735	0.694644
AT3G10330.1	1.654	0.279545	0.382421	0.683311	1.652	0.252772	0.380961	0.723361
AT4G08500.1	1.811	0.292646	0.388853	0.6697	2.133	0.330625	0.453233	0.682209
AT4G03260.2	1.817	0.274907	0.376926	0.684518	1.428	0.257559	0.337359	0.667303
AT5G67320.1	1.614	0.357079	0.358765	0.551607	1.695	0.348759	0.347669	0.547189
AT4G31180.1	2.033	0.330774	0.390926	0.620369	2.339	0.311495	0.397258	0.651513
AT4G31180.2	2.038	0.326802	0.391179	0.625973	2.384	0.315341	0.403922	0.653243
AT4G03200.2	1.993	0.320112	0.3944	0.641069	2.006	0.312729	0.395091	0.651223
AT4G03200.1	1.916	0.302038	0.378626	0.648746	1.94	0.300993	0.387526	0.658977
AT1G08880.1	1.601	0.349198	0.380061	0.580833	1.806	0.363432	0.424289	0.61976
AT1G09580.1	1.622	0.28592	0.40066	0.692934	1.49	0.272712	0.394189	0.703378
AT5G44240.2	1.828	0.24043	0.389175	0.745979	1.685	0.208928	0.337909	0.746108
AT3G57660.1	2.207	0.213407	0.380727	0.778989	2.162	0.20554	0.346853	0.760693
AT3G15160.1	2.862	0.262157	0.406235	0.725498	3.209	0.260729	0.457895	0.772231
AT1G74260.1	1.749	0.3018	0.371638	0.638526	1.902	0.312897	0.412842	0.670404
AT3G22590.1	1.841	0.329061	0.371103	0.602098	1.736	0.327427	0.378714	0.612983
AT1G52500.1	1.248	0.149404	0.266407	0.774551	1.345	0.109929	0.235122	0.825531
AT3G25717.1	1.289	0.495154	0.359139	0.415081	1.725	0.501365	0.477947	0.525747
AT2G46030.1	1.397	0.277019	0.372907	0.676035	1.722	0.266157	0.392558	0.711311
AT3G57080.1	1.588	0.288476	0.386352	0.675505	2.055	0.295288	0.459842	0.73133
AT2G47110.1	1.408	0.402628	0.332942	0.460297	1.729	0.406901	0.364125	0.496221
AT2G47110.2	1.466	0.404605	0.339049	0.465684	1.599	0.417395	0.378025	0.503361
AT3G25190.1	2.219	0.263953	0.414799	0.728948	2.422	0.279216	0.470024	0.757805
AT5G27150.1	1.859	0.281019	0.389903	0.690373	1.492	0.221639	0.296199	0.674049
AT2G45010.1	1.595	0.317157	0.378297	0.624794	1.62	0.275704	0.395676	0.70061
AT1G01790.1	1.827	0.299346	0.371428	0.642178	2.287	0.325242	0.469922	0.702371
AT5G57120.1	1.716	0.382101	0.354458	0.514123	1.756	0.371833	0.338241	0.504684
AT5G20520.1	1.659	0.257278	0.358465	0.689391	1.516	0.245643	0.353849	0.705662
AT3G04310.1	1.792	0.24268	0.38255	0.73597	1.451	0.229214	0.332262	0.704048
AT1G11910.1	1.73	0.361823	0.366875	0.554475	1.335	0.336651	0.335957	0.549157
AT4G12310.1	1.671	0.282074	0.374316	0.669928	1.89	0.270646	0.389119	0.705287
AT1G27970.2	1.934	0.271868	0.388398	0.697229	1.512	0.241485	0.353407	0.710399
AT5G09230.5	1.876	0.257241	0.401305	0.731578	1.914	0.232753	0.348438	0.711852
AT4G30020.1	2.298	0.276464	0.387128	0.690649	2.038	0.256693	0.376175	0.709997
AT5G20500.1	1.498	0.381704	0.352881	0.514366	1.357	0.34102	0.35467	0.570137
AT2G01190.1	1.968	0.325943	0.376129	0.613253	2.023	0.317072	0.400253	0.648117
AT1G01780.1	1.507	0.29462	0.40491	0.687682	1.389	0.241065	0.358043	0.717914
AT5G62050.1	1.709	0.271856	0.372163	0.683338	1.895	0.233906	0.350817	0.717606
AT3G60130.1	1.801	0.316848	0.376759	0.624148	1.875	0.317514	0.422303	0.673335
AT2G40750.1	1.549	0.334034	0.380481	0.607903	2.077	0.352446	0.492238	0.694587
AT3G60130.3	1.865	0.287515	0.369625	0.655809	1.889	0.288165	0.406499	0.696456
AT1G09830.1	1.614	0.272508	0.371	0.681347	2.202	0.293789	0.419325	0.699063
AT3G12120.2	1.768	0.349504	0.359988	0.556858	1.53	0.316269	0.314204	0.545098
AT3G12550.1	1.564	0.256801	0.379521	0.715568	1.892	0.251895	0.373294	0.714979
AT3G19640.1	1.584	0.291166	0.376578	0.659137	1.794	0.264465	0.355648	0.671709
AT3G06480.1	2.267	0.269217	0.389186	0.700864	2.321	0.24447	0.385907	0.733318
AT1G32460.1	1.491	0.355013	0.378198	0.579447	1.892	0.41624	0.521734	0.647251
AT2G23070.1	1.462	0.27809	0.366764	0.670566	1.861	0.313225	0.429764	0.686202
AT5G06265.3	1.582	0.417812	0.443333	0.574193	1.489	0.366896	0.414047	0.601698
AT5G02800.1	1.815	0.196861	0.341611	0.767996	1.511	0.180469	0.31904	0.777564
AT2G16930.1	1.453	0.311617	0.357461	0.607018	1.218	0.273081	0.320169	0.621434
AT2G16930.2	1.445	0.304532	0.354883	0.613913	1.231	0.275856	0.323506	0.621536
AT2G16930.3	1.446	0.295847	0.354377	0.625929	1.23	0.270509	0.321909	0.627979
AT5G24314.2	1.409	0.36513	0.37546	0.562742	1.927	0.369697	0.43987	0.627122
AT4G16141.1	1.786	0.455512	0.388085	0.475754	1.999	0.461631	0.432785	0.518184
AT5G19930.2	1.739	0.22155	0.397454	0.784152	2.466	0.216605	0.471925	0.840193
AT5G42770.1	1.549	0.345914	0.384375	0.593633	1.553	0.344661	0.374804	0.58667
AT5G42770.2	1.619	0.30536	0.388936	0.651078	1.642	0.311017	0.385244	0.642602
AT5G19930.1	1.753	0.220085	0.399209	0.787229	2.476	0.214987	0.472936	0.842609
AT2G16950.2	2.051	0.241957	0.379539	0.734646	2.041	0.243993	0.404369	0.754952
AT2G16950.1	2.109	0.235134	0.381098	0.746127	2.091	0.236704	0.405083	0.765489
AT5G10060.1	2.292	0.313802	0.408144	0.659212	2.197	0.330422	0.43734	0.668244
AT3G29160.1	1.8	0.303574	0.405331	0.670114	2.002	0.295119	0.42295	0.697564
AT3G29160.2	1.755	0.293551	0.394856	0.673235	1.982	0.291423	0.418522	0.698406
AT3G29160.3	1.751	0.290961	0.397643	0.678005	1.947	0.284547	0.411333	0.701411
AT1G69935.1	1.432	0.284722	0.377842	0.671045	1.472	0.263243	0.358748	0.683712
AT5G61770.3	2.432	0.279733	0.399717	0.692223	1.689	0.270469	0.372764	0.68649
AT5G61770.2	2.298	0.265553	0.377268	0.689537	1.616	0.261282	0.357394	0.683715
AT5G61770.1	2.322	0.276801	0.397088	0.691634	1.605	0.263828	0.36242	0.686386
AT2G34925.1	1.592	0.187216	0.346772	0.789233	1.109	0.163259	0.290303	0.785288
AT2G48121.1	1.385	0.28181	0.383927	0.685559	2.085	0.231727	0.458919	0.808047
AT1G11680.1	1.648	0.308884	0.389745	0.650033	2.134	0.328285	0.442059	0.676164
AT3G01610.1	2.379	0.253784	0.399054	0.73115	2.702	0.274284	0.432016	0.734989
AT2G48121.2	1.392	0.34268	0.378977	0.595833	1.759	0.231758	0.395334	0.759269
AT3G62650.1	1.614	0.412282	0.392869	0.53002	1.955	0.443173	0.460686	0.566623
AT5G64380.1	1.699	0.299579	0.382232	0.653379	2.762	0.305981	0.442485	0.699182
AT3G45900.1	1.501	0.272583	0.3853	0.69942	1.635	0.270968	0.408176	0.723524
AT2G33630.1	1.939	0.282601	0.383342	0.676268	2.139	0.292671	0.401566	0.677715
AT4G11100.2	1.755	0.376673	0.381477	0.552422	1.818	0.397521	0.408045	0.559193
AT4G11100.1	1.723	0.376799	0.376583	0.546916	1.779	0.392528	0.400737	0.556997
AT5G05730.1	1.839	0.330085	0.369356	0.593724	1.692	0.327898	0.385498	0.620324
AT2G37400.1	1.662	0.296147	0.368318	0.640929	1.652	0.248225	0.318404	0.654072
AT5G05730.2	1.815	0.308833	0.371322	0.62557	1.718	0.311212	0.38568	0.642865
AT1G74920.1	1.698	0.347742	0.358806	0.558647	1.716	0.350429	0.366042	0.566756
AT1G29880.1	1.674	0.328105	0.369169	0.600912	1.939	0.354617	0.401765	0.603504
AT5G08560.2	1.933	0.302603	0.391905	0.659885	1.926	0.307929	0.425508	0.687602
AT1G54610.1	2.018	0.294425	0.370573	0.649281	1.67	0.293681	0.352194	0.628476
AT1G54610.2	2.054	0.293062	0.374664	0.656288	1.69	0.293041	0.35379	0.63115
AT1G54610.3	2.044	0.298848	0.375395	0.648431	1.688	0.296719	0.355857	0.628504
AT5G23630.1	1.842	0.265379	0.388631	0.706854	1.823	0.248781	0.367137	0.711363
AT5G55580.1	2.067	0.292772	0.420558	0.697573	2.131	0.298266	0.452913	0.722004
AT1G25560.1	1.454	0.355762	0.371073	0.570089	1.846	0.371276	0.462819	0.647073
AT1G65840.1	2.487	0.290966	0.416716	0.700159	2.422	0.312032	0.483791	0.729902
AT1G19740.1	1.701	0.357059	0.368728	0.557921	1.808	0.357501	0.415961	0.611975
AT2G38000.1	1.976	0.337439	0.396069	0.616965	2.231	0.30423	0.405664	0.668978
AT1G20816.1	1.518	0.313125	0.391432	0.644044	1.812	0.327767	0.454259	0.688398
AT5G43760.1	2.066	0.356401	0.368915	0.561132	1.97	0.360128	0.40721	0.603487
AT4G28740.1	1.916	0.336388	0.390821	0.614726	1.574	0.285002	0.309005	0.583905
AT5G23405.2	1.564	0.361888	0.398711	0.592875	1.704	0.37593	0.425638	0.605449
AT3G16140.1	1.41	0.473296	0.329504	0.396546	1.972	0.533195	0.469913	0.492663
AT1G51610.1	2.199	0.313561	0.397807	0.650881	2.243	0.357934	0.511269	0.702566
AT1G08370.1	1.749	0.290946	0.39553	0.681208	1.431	0.247423	0.341419	0.688637
AT2G22490.1	1.875	0.265078	0.383404	0.706321	1.491	0.220157	0.317016	0.704053
AT2G22490.2	1.898	0.26125	0.383593	0.711856	1.522	0.217433	0.318818	0.710559
AT1G24020.1	1.977	0.38155	0.416334	0.582527	1.778	0.367199	0.40933	0.595926
AT3G16720.1	1.832	0.262133	0.393222	0.719088	2.02	0.298699	0.503943	0.763283
AT1G73710.1	2.785	0.208119	0.38785	0.790117	2.357	0.201278	0.393152	0.805501
AT5G47435.1	2.008	0.281594	0.384467	0.679394	1.532	0.253059	0.340759	0.676538
AT1G07135.1	1.291	0.54078	0.350542	0.371545	1.71	0.57812	0.470276	0.462624
AT4G32070.1	1.546	0.302352	0.358542	0.622904	1.496	0.278913	0.333324	0.626485
AT1G66100.1	1.406	0.35778	0.363221	0.55629	2.416	0.577283	0.670087	0.616742
AT5G60640.1	1.522	0.302471	0.351085	0.612004	1.554	0.299776	0.34839	0.613107
AT5G60640.2	1.573	0.310119	0.362794	0.616282	1.6	0.287135	0.350645	0.636159
AT5G60640.3	1.54	0.292723	0.354435	0.630832	1.567	0.287494	0.348552	0.630973
AT1G25211.1	1.673	0.319008	0.377261	0.620607	1.832	0.308492	0.389155	0.651119
AT3G52420.1	1.528	0.363213	0.384978	0.570342	1.615	0.389602	0.419963	0.581841
AT3G53500.2	1.895	0.362551	0.377959	0.563621	1.912	0.368737	0.421819	0.607817
AT3G53500.1	1.555	0.348739	0.380189	0.585386	1.857	0.355578	0.416043	0.618746
AT5G60620.1	1.663	0.309376	0.374947	0.630668	1.595	0.288047	0.357728	0.643385
AT2G47850.1	1.689	0.292412	0.410694	0.689865	1.809	0.243553	0.383558	0.739329
AT1G45249.1	1.725	0.325247	0.369572	0.604834	1.263	0.25163	0.263749	0.570133
AT1G45249.2	1.547	0.259858	0.355161	0.684261	1.27	0.202369	0.257038	0.654061
AT1G45249.3	1.569	0.299115	0.368542	0.640469	1.263	0.230899	0.262307	0.605906
AT2G01100.1	1.751	0.42461	0.371393	0.488008	1.389	0.449	0.370576	0.467935
AT2G01100.3	1.822	0.431074	0.384335	0.495973	1.44	0.464135	0.384024	0.469019
AT2G01100.2	1.695	0.41063	0.359597	0.488511	1.359	0.440138	0.362754	0.467333
AT5G27860.1	1.49	0.320106	0.38499	0.631925	1.531	0.297382	0.372528	0.649331
AT4G23885.1	1.722	0.341645	0.413766	0.631437	1.4	0.289798	0.368291	0.652965
AT5G27860.2	1.503	0.320043	0.384677	0.632394	1.531	0.291309	0.36515	0.649239
AT1G54310.1	1.639	0.226072	0.326682	0.703347	1.321	0.180496	0.297771	0.754439
AT1G54770.1	1.405	0.33182	0.378494	0.607379	1.447	0.307134	0.362087	0.622595
AT3G21610.2	1.831	0.295652	0.428442	0.707141	1.567	0.263155	0.37067	0.695808
AT3G14350.2	1.77	0.287815	0.38348	0.671777	1.395	0.257348	0.332661	0.661848
AT3G14350.1	1.708	0.281147	0.370434	0.667121	1.352	0.249676	0.321328	0.659891
AT3G21610.1	1.804	0.228111	0.379854	0.75681	1.56	0.204169	0.334227	0.751974
AT1G33600.1	2.163	0.304876	0.385434	0.649449	2.522	0.352226	0.523333	0.714891
AT1G32160.1	1.677	0.307698	0.380424	0.640643	2.163	0.338725	0.478959	0.697349
AT5G08760.1	1.71	0.390077	0.389433	0.542261	1.885	0.3886	0.41689	0.572462
AT5G39740.2	1.775	0.453934	0.357645	0.445158	2.193	0.432623	0.406162	0.52043
AT5G54860.1	1.965	0.23567	0.388557	0.752343	2.08	0.194879	0.33522	0.764723
AT2G21260.1	2.24	0.189282	0.411964	0.839247	2.115	0.19447	0.436975	0.848887
AT3G07430.1	1.628	0.334478	0.365704	0.589674	1.731	0.302278	0.353644	0.617543
AT4G24510.1	1.824	0.340422	0.375478	0.591849	1.728	0.319208	0.382839	0.630664
AT1G70090.1	1.658	0.323144	0.385867	0.629036	2.168	0.297883	0.434652	0.706492
AT1G70090.2	1.687	0.310859	0.389855	0.649576	2.322	0.301528	0.462277	0.725523
AT3G21630.1	1.67	0.292715	0.378398	0.658006	1.986	0.273271	0.392707	0.702144
AT1G70430.1	2.842	0.182447	0.428008	0.854376	2.202	0.165374	0.375915	0.848908
AT4G27040.1	1.535	0.335542	0.394364	0.619928	1.484	0.295455	0.373816	0.650068
AT5G66520.1	1.844	0.244587	0.370915	0.719423	2.756	0.299157	0.511681	0.765697
AT3G21810.1	1.787	0.363711	0.385515	0.575384	1.92	0.39028	0.44112	0.604508
AT1G17650.1	1.73	0.309155	0.375629	0.635123	1.742	0.351411	0.439662	0.648382
AT1G76405.2	1.511	0.337305	0.38654	0.610566	2.002	0.384365	0.488877	0.650898
AT4G32605.1	2.199	0.316969	0.396162	0.640733	2.055	0.263163	0.377038	0.699741
AT2G41500.1	2.658	0.276094	0.402344	0.702627	2.238	0.263917	0.420003	0.736403
AT5G51640.1	2.55	0.247498	0.412047	0.747746	2.118	0.218712	0.367068	0.757277
AT3G21430.2	2.489	0.246726	0.397452	0.740622	2.438	0.221354	0.36511	0.748556
AT3G48820.1	1.843	0.27486	0.385597	0.693853	1.478	0.261352	0.350322	0.677011
AT3G48820.2	1.839	0.277604	0.386414	0.69063	1.479	0.26237	0.352264	0.677842
AT1G71850.1	1.459	0.271929	0.374843	0.687603	1.711	0.242738	0.36225	0.717106
AT2G26900.1	1.516	0.352818	0.36623	0.565376	1.753	0.344479	0.398528	0.614792
AT2G46535.1	1.619	0.307909	0.3986	0.659887	1.323	0.244851	0.304538	0.64446
AT4G26670.1	1.834	0.347051	0.363638	0.565238	1.859	0.326905	0.428922	0.665837
AT1G36050.2	1.861	0.359368	0.387525	0.582602	1.534	0.326009	0.358789	0.593739
AT3G58500.1	1.634	0.3528	0.36594	0.562343	1.688	0.35182	0.377263	0.575809
AT5G54720.1	1.627	0.319329	0.396742	0.646839	2.709	0.394912	0.57616	0.706973
AT3G02870.1	1.953	0.349574	0.399838	0.606044	1.789	0.318851	0.412241	0.661724
AT3G02870.3	1.955	0.337963	0.400226	0.621876	1.811	0.319182	0.418046	0.667267
AT3G02870.2	1.531	0.316919	0.40668	0.658275	1.686	0.292911	0.407579	0.691334
AT5G47110.1	1.584	0.366504	0.355762	0.536744	1.425	0.382097	0.387794	0.559957
AT1G18250.1	1.862	0.310967	0.414262	0.668022	2.558	0.317337	0.474314	0.715324
AT1G18250.2	1.95	0.325304	0.430928	0.664878	2.621	0.326575	0.484325	0.711768
AT3G66652.1	2.156	0.232825	0.389201	0.754151	2.543	0.234645	0.381568	0.745325
AT3G66652.2	2.156	0.232866	0.389217	0.754109	2.532	0.233234	0.379603	0.745621
AT2G03710.2	1.679	0.307104	0.37126	0.625231	1.386	0.247944	0.336843	0.679986
AT2G03710.3	1.543	0.311284	0.390036	0.646588	1.591	0.229803	0.34734	0.720068
AT4G21540.3	1.646	0.338447	0.372683	0.591015	1.605	0.293298	0.357769	0.638111
AT5G20000.1	1.704	0.332839	0.376691	0.602532	1.486	0.333174	0.342445	0.561185
AT5G54310.1	2.136	0.374743	0.380835	0.555724	2.223	0.36813	0.399559	0.584151
AT4G18060.1	2.025	0.330569	0.406617	0.635372	2.592	0.359468	0.469894	0.659171
AT2G30150.1	1.522	0.273346	0.362365	0.672741	1.594	0.270965	0.370429	0.68368
AT5G20140.2	1.829	0.283351	0.367649	0.663997	1.667	0.285626	0.382319	0.675408
AT5G40970.1	1.415	0.210736	0.385849	0.793177	1.676	0.233218	0.412785	0.78089
AT5G59250.1	1.433	0.294871	0.378372	0.657629	1.789	0.287269	0.416438	0.707168
AT4G29480.1	1.468	0.398274	0.349956	0.491191	1.595	0.418086	0.378393	0.507817
AT5G37830.1	1.817	0.316709	0.37885	0.627327	2.079	0.311074	0.390071	0.646905
AT3G49601.1	1.828	0.431686	0.350616	0.456055	1.725	0.437158	0.368027	0.473526
AT1G28340.1	2.094	0.27285	0.394149	0.701312	1.648	0.251529	0.371733	0.715692
AT5G44800.1	1.995	0.249491	0.37403	0.717455	1.878	0.234928	0.364029	0.730734
AT2G01021.1	1.562	0.124279	0.323319	0.872763	1.545	0.128116	0.323119	0.860638
AT3G06190.1	1.571	0.323558	0.381087	0.621743	1.599	0.275799	0.349661	0.651576
AT4G00730.2	1.823	0.279408	0.377104	0.677269	1.685	0.234146	0.357017	0.724509
AT4G00730.1	1.789	0.301246	0.381833	0.651636	1.655	0.270616	0.380506	0.693105
AT4G38260.1	1.852	0.382871	0.412385	0.582528	1.921	0.37342	0.417582	0.594086
AT2G29580.1	1.715	0.273768	0.403046	0.710946	1.794	0.23616	0.362238	0.728083
AT3G16810.1	1.643	0.280759	0.378354	0.677373	1.686	0.263205	0.373916	0.69903
AT2G46220.1	1.511	0.408587	0.367771	0.500524	1.807	0.412422	0.433766	0.572542
AT2G18700.1	1.906	0.311169	0.377553	0.634458	2.071	0.294895	0.410538	0.691388
AT5G14120.1	1.606	0.350174	0.360267	0.558635	2.313	0.441471	0.518707	0.621693
AT5G24630.5	1.835	0.290837	0.401074	0.684862	2.2	0.314925	0.440825	0.691796
AT5G24630.4	1.819	0.298414	0.397608	0.669798	2.206	0.316465	0.441815	0.690557
AT5G04480.2	1.759	0.255129	0.370116	0.706541	1.675	0.232777	0.330259	0.698758
AT5G24630.6	1.853	0.289677	0.402671	0.687667	2.235	0.306579	0.445652	0.707096
AT5G24630.1	1.834	0.294118	0.39917	0.67718	2.215	0.309608	0.438342	0.696592
AT5G24630.3	1.82	0.298301	0.397611	0.669947	2.211	0.317658	0.443036	0.690176
AT5G52470.1	1.69	0.420303	0.359018	0.481097	1.531	0.416476	0.391574	0.52516
AT4G15560.1	1.644	0.384398	0.37089	0.534845	2.13	0.406415	0.461288	0.60752
AT4G00750.1	1.653	0.325502	0.368923	0.602811	1.552	0.30237	0.353528	0.618687
AT2G40660.1	1.775	0.343483	0.369838	0.579139	1.61	0.358864	0.393142	0.590288
AT3G52155.1	1.859	0.310914	0.381718	0.636487	1.922	0.305552	0.389958	0.656014
AT4G39350.1	2.226	0.300564	0.373218	0.641016	1.826	0.301798	0.389262	0.657314
AT1G24510.1	1.435	0.373423	0.356626	0.5281	1.652	0.370708	0.372218	0.55393
AT3G52390.1	1.542	0.279945	0.38491	0.684043	1.591	0.279033	0.373814	0.674494
AT1G76360.1	1.754	0.31116	0.38704	0.643137	2.184	0.352759	0.47833	0.678743
AT1G09160.2	2.135	0.265736	0.388451	0.708835	1.628	0.247826	0.396404	0.74597
AT3G52390.2	1.547	0.270659	0.383249	0.696049	1.577	0.261618	0.361611	0.687643
AT4G31310.1	1.439	0.338117	0.374059	0.591478	1.669	0.390515	0.428549	0.590891
AT3G58040.1	1.796	0.277399	0.386776	0.689183	1.45	0.240653	0.321888	0.67355
AT4G35750.1	1.666	0.39349	0.395087	0.549431	1.687	0.330374	0.416646	0.648836
AT2G45910.1	2.028	0.292899	0.400393	0.681331	1.789	0.265273	0.356675	0.676493
AT1G20110.1	1.813	0.28057	0.379184	0.678495	1.812	0.248709	0.351496	0.695106
AT3G53900.2	1.437	0.328322	0.38155	0.614747	2.086	0.37319	0.491763	0.669155
AT3G53900.1	1.443	0.324324	0.378919	0.617265	1.744	0.373997	0.485325	0.663531
AT5G54300.1	1.944	0.28185	0.398988	0.698742	1.441	0.231508	0.300432	0.660779
AT1G09590.1	1.601	0.404298	0.350512	0.484723	1.574	0.406063	0.384695	0.528118
AT2G39000.1	1.616	0.278748	0.367684	0.669201	1.844	0.257847	0.404762	0.735225
AT1G18030.2	1.819	0.264164	0.38839	0.706631	1.895	0.249689	0.360231	0.702795
AT4G30950.1	1.735	0.399606	0.360727	0.503664	1.69	0.417857	0.414591	0.547666
AT3G22142.1	2.134	0.294697	0.361917	0.631966	2.563	0.402627	0.512465	0.651617
AT5G22770.2	2.011	0.305588	0.381108	0.64293	1.981	0.296232	0.387829	0.664139
AT4G38040.1	1.832	0.256075	0.384388	0.718925	1.559	0.249955	0.367409	0.710456
AT2G26500.2	1.451	0.365879	0.351475	0.530246	1.61	0.396647	0.385409	0.535448
AT2G26500.3	1.222	0.337517	0.336675	0.547265	1.782	0.376864	0.397133	0.568181
AT3G04880.1	1.615	0.31841	0.367538	0.608472	1.846	0.303264	0.370786	0.637988
AT4G35080.1	1.667	0.269744	0.392733	0.705465	1.581	0.23837	0.380414	0.743726
AT4G35080.3	1.751	0.248545	0.396478	0.740945	1.646	0.219567	0.382043	0.774196
AT1G80460.2	1.878	0.33588	0.378104	0.596678	1.657	0.327198	0.373784	0.609325
AT1G20770.1	1.351	0.340465	0.392023	0.614503	1.331	0.309869	0.341615	0.595
AT5G61020.1	1.733	0.370793	0.358058	0.534739	1.676	0.353198	0.374766	0.576328
AT2G36145.1	1.407	0.412644	0.344704	0.471393	1.631	0.411116	0.388506	0.520774
AT5G17070.1	1.683	0.340255	0.364297	0.574794	1.551	0.346841	0.392111	0.604782
AT5G22770.1	1.964	0.312955	0.37653	0.628152	1.915	0.298872	0.378855	0.650682
AT5G04870.1	1.662	0.324155	0.372782	0.608823	1.841	0.324989	0.400476	0.639286
AT5G46430.2	1.236	0.365917	0.356971	0.540915	1.688	0.398985	0.397393	0.546706
AT5G46430.1	1.238	0.376568	0.357393	0.528817	1.681	0.406301	0.397672	0.539202
AT5G46250.2	2.094	0.326402	0.38706	0.620625	1.434	0.310588	0.367716	0.625909
AT3G48420.1	1.566	0.362927	0.359896	0.544449	1.828	0.371574	0.400162	0.58239
AT2G22170.1	1.522	0.318923	0.356929	0.598853	2.536	0.383386	0.531861	0.687686
AT4G19120.1	1.706	0.339333	0.373428	0.591717	1.48	0.298164	0.332099	0.596506
AT4G19120.2	1.692	0.33764	0.370183	0.590035	1.467	0.298708	0.32967	0.592516
AT1G04635.1	1.705	0.272694	0.409972	0.71696	1.844	0.248122	0.427622	0.766764
AT3G06670.2	1.932	0.280925	0.373141	0.670509	1.7	0.248692	0.336706	0.67873
AT3G06670.1	1.897	0.285195	0.368499	0.658842	1.669	0.253163	0.331415	0.664177
AT1G43670.1	1.377	0.393824	0.336181	0.475861	1.816	0.438926	0.399732	0.507246
AT5G63905.1	1.507	0.341708	0.395576	0.611524	1.754	0.348377	0.410212	0.608965
AT4G09650.1	1.724	0.433364	0.350072	0.455616	2.291	0.468855	0.461804	0.539663
AT3G17712.2	2.199	0.208578	0.382102	0.784911	2.138	0.187769	0.343369	0.784437
AT2G31600.2	1.9	0.234922	0.417411	0.778896	2.108	0.252323	0.450822	0.779832
AT2G30320.1	2.196	0.282769	0.368418	0.658673	1.625	0.284707	0.363094	0.654526
AT3G17712.3	2.155	0.22722	0.387623	0.760452	2.081	0.205865	0.345738	0.754437
AT5G01530.1	1.987	0.45679	0.336954	0.415993	2.299	0.4345	0.408465	0.522084
AT1G20960.1	1.902	0.305046	0.369391	0.630618	1.696	0.292767	0.356326	0.63597
AT1G20960.2	1.906	0.305027	0.370186	0.631593	1.702	0.293298	0.357176	0.636175
AT1G30460.1	2.294	0.331924	0.413765	0.639946	2.158	0.306513	0.386092	0.650088
AT3G50670.1	1.517	0.355132	0.354202	0.547184	1.373	0.35882	0.3541	0.546244
AT3G50670.2	1.489	0.349506	0.39225	0.600367	1.534	0.323121	0.376786	0.619657
AT4G01330.1	1.808	0.334212	0.374977	0.599089	2.458	0.421963	0.556993	0.667697
AT4G01330.2	1.861	0.344342	0.382749	0.596269	2.542	0.434044	0.573376	0.668235
AT4G36420.1	1.608	0.430771	0.392308	0.507329	1.735	0.43147	0.415911	0.53437
AT5G09220.1	1.699	0.317094	0.379509	0.628592	2.054	0.325522	0.449289	0.688354
AT3G05410.2	1.642	0.317082	0.377282	0.627137	1.889	0.348608	0.434758	0.648223
AT1G10060.2	2.219	0.342539	0.403188	0.616066	2.241	0.389793	0.526387	0.679215
AT3G54050.2	1.705	0.417062	0.349911	0.469331	1.645	0.445301	0.415871	0.52157
AT3G05410.1	1.452	0.279415	0.400864	0.703097	1.887	0.289814	0.44874	0.731087
AT2G14460.1	1.298	0.296188	0.368873	0.646364	1.137	0.221797	0.292231	0.667884
AT3G19990.1	1.735	0.309537	0.374236	0.627808	1.713	0.277833	0.344422	0.63957
AT2G33570.1	1.743	0.276161	0.377602	0.681688	2.495	0.285532	0.420479	0.708852
AT1G60995.1	1.786	0.245913	0.37399	0.72008	1.627	0.231667	0.34072	0.711163
AT2G27100.1	1.776	0.304822	0.378261	0.641803	1.658	0.27409	0.365212	0.673068
AT4G13220.1	1.454	0.295228	0.391703	0.672579	1.447	0.282274	0.353279	0.645359
AT4G39330.2	1.99	0.385355	0.409397	0.57153	1.356	0.291178	0.300012	0.561658
AT5G12350.1	1.874	0.259001	0.389211	0.71685	1.725	0.240421	0.357286	0.714732
AT5G05450.1	1.827	0.294904	0.373692	0.652556	2.009	0.313984	0.394471	0.647556
AT3G20860.1	1.935	0.196806	0.369739	0.798555	1.451	0.18841	0.302628	0.743894
AT2G20760.1	1.662	0.39188	0.352943	0.498505	1.702	0.358297	0.349618	0.537998
AT5G65430.1	1.508	0.365989	0.388688	0.57825	1.783	0.386797	0.441652	0.609367
AT5G65430.2	1.505	0.352755	0.388022	0.593764	1.794	0.378131	0.444257	0.623418
AT5G65430.3	1.545	0.324816	0.394463	0.637768	1.841	0.349075	0.448429	0.661863
AT3G17780.1	1.285	0.384397	0.355229	0.51348	1.692	0.347513	0.359172	0.556195
AT5G54440.1	2.012	0.252793	0.381876	0.72036	2.469	0.261329	0.398259	0.72373
AT2G28430.1	1.403	0.301991	0.401566	0.673699	1.524	0.25206	0.407996	0.74933
AT2G01870.1	1.547	0.291239	0.390012	0.673531	2.432	0.289098	0.471524	0.7443
AT3G02860.2	1.676	0.361015	0.373873	0.564667	2.179	0.37169	0.412454	0.591646
AT1G48920.1	1.758	0.439867	0.341163	0.436072	1.748	0.446351	0.387742	0.488635
AT2G28890.1	1.665	0.290161	0.384215	0.671891	1.925	0.294252	0.405922	0.687364
AT1G08580.1	1.691	0.419741	0.369535	0.48971	1.635	0.438382	0.391471	0.498667
AT3G08610.1	1.307	0.4468	0.352108	0.446476	1.299	0.342642	0.36774	0.583285
AT1G09150.1	1.477	0.348628	0.377352	0.58635	1.641	0.318284	0.381116	0.62756
AT3G06700.1	1.507	0.432153	0.352301	0.456271	1.443	0.394483	0.346523	0.494295
AT2G01970.1	1.745	0.277007	0.384347	0.688387	1.558	0.256949	0.345768	0.674478
AT3G19650.1	1.897	0.352457	0.373026	0.569934	1.654	0.377593	0.385947	0.561682
AT5G65000.1	2.19	0.246235	0.391192	0.732098	1.996	0.237881	0.390443	0.746234
AT1G07020.1	1.929	0.351844	0.393413	0.597147	1.571	0.315902	0.362894	0.610506
AT5G65000.2	2.267	0.2425	0.417709	0.763641	2.026	0.219005	0.399858	0.783911
AT4G21150.2	1.736	0.285162	0.383512	0.674981	1.927	0.265971	0.379593	0.699723
AT4G21150.3	1.87	0.295369	0.390183	0.6669	1.595	0.271323	0.380008	0.693046
AT4G21150.1	1.862	0.295421	0.38857	0.665165	1.592	0.271	0.379283	0.692745
AT3G61080.1	1.542	0.362197	0.368623	0.558197	2.102	0.388814	0.457039	0.618401
AT5G65020.2	1.604	0.288175	0.372827	0.662046	1.506	0.261195	0.321171	0.638559
AT5G65020.1	1.645	0.303437	0.380892	0.649516	1.529	0.262352	0.323627	0.639738
AT1G23290.1	1.261	0.385856	0.342341	0.496075	1.353	0.336057	0.368569	0.591889
AT5G47500.1	2.025	0.317483	0.389374	0.637593	2.053	0.376842	0.485737	0.657965
AT1G34000.1	1.533	0.315603	0.367391	0.616405	1.535	0.280187	0.364368	0.661639
AT3G53410.1	2.181	0.244729	0.408984	0.753842	2.026	0.243907	0.405177	0.754902
AT5G23940.1	2.531	0.280737	0.388573	0.680719	1.761	0.277648	0.379768	0.681152
AT1G13870.1	1.654	0.275807	0.361018	0.661295	1.485	0.264665	0.367163	0.689534
AT3G05900.1	1.715	0.41301	0.348577	0.471707	2.027	0.466904	0.433302	0.516971
AT1G55140.1	2.181	0.336224	0.378419	0.596339	1.678	0.293836	0.376366	0.653172
AT2G26560.1	1.701	0.347534	0.356635	0.55752	2.872	0.497637	0.664761	0.675452
AT2G39080.1	1.694	0.346566	0.383784	0.593986	1.864	0.361217	0.428568	0.622822
AT4G02120.1	1.785	0.309385	0.382255	0.637804	1.755	0.317294	0.416272	0.665751
AT4G31420.1	1.461	0.318168	0.371619	0.616963	1.403	0.271037	0.324401	0.628271
AT2G38870.1	1.413	0.232255	0.311442	0.670509	1.484	0.232353	0.344148	0.701894
AT5G38480.2	1.495	0.367241	0.371878	0.555202	1.877	0.414155	0.43191	0.564565
AT5G38480.1	1.474	0.40368	0.363185	0.503087	1.848	0.453664	0.420739	0.513033
AT3G02110.1	1.653	0.292546	0.37862	0.660776	1.919	0.283014	0.410901	0.707868
AT1G17470.1	1.695	0.34976	0.379837	0.586419	1.827	0.325688	0.362623	0.595176
AT5G49470.3	2.265	0.271086	0.385023	0.695143	2.314	0.273997	0.403195	0.708647
AT3G14400.1	2.222	0.266792	0.386527	0.69977	2.243	0.245825	0.347354	0.690923
AT1G17470.2	1.692	0.342578	0.378654	0.594277	1.835	0.321989	0.362925	0.600363
AT1G09130.3	1.724	0.369986	0.367969	0.545135	1.548	0.361986	0.379153	0.572807
AT1G09130.2	1.728	0.380573	0.370141	0.534901	1.573	0.379743	0.387245	0.560161
AT1G09130.1	1.706	0.398496	0.368532	0.513864	1.536	0.381093	0.380233	0.550206
AT1G55150.1	1.554	0.280839	0.378097	0.676605	1.669	0.26128	0.377192	0.705672
AT1G07780.4	1.83	0.361837	0.436328	0.630859	1.796	0.379751	0.50046	0.671975
AT1G07780.5	1.804	0.342783	0.407354	0.623137	1.712	0.366349	0.469944	0.660329
AT1G07780.2	1.742	0.326558	0.392705	0.628102	1.664	0.355995	0.456877	0.660525
AT1G07780.3	1.849	0.359288	0.419003	0.615155	1.742	0.380542	0.479241	0.652697
AT1G07780.1	1.72	0.334235	0.389713	0.615076	1.628	0.353614	0.447663	0.654894
AT3G10070.1	2.057	0.222729	0.380993	0.763776	2.328	0.22342	0.408464	0.782883
AT5G19010.1	1.961	0.314979	0.387371	0.637392	1.948	0.318819	0.408538	0.656283
AT4G25630.1	1.872	0.29786	0.390324	0.660632	1.766	0.268484	0.362177	0.674484
AT4G16360.3	1.504	0.273496	0.392817	0.703191	1.858	0.232804	0.375856	0.746223
AT4G16360.2	2.465	0.289256	0.414166	0.694164	1.915	0.233146	0.370189	0.739908
AT4G16360.1	2.44	0.28674	0.408762	0.693235	1.879	0.23641	0.366664	0.730194
AT2G29970.1	1.943	0.260813	0.381531	0.709285	2.023	0.252768	0.370424	0.706504
AT5G19030.2	1.801	0.252078	0.393923	0.729463	1.501	0.224301	0.337804	0.71999
AT5G16750.1	1.798	0.264621	0.379997	0.701273	2.182	0.268193	0.400215	0.713489
AT4G26970.1	1.688	0.303017	0.370993	0.638711	1.54	0.288384	0.3667	0.656535
AT3G22320.1	1.479	0.381933	0.371742	0.540073	1.393	0.382191	0.370961	0.537012
AT1G68160.1	1.814	0.242236	0.394014	0.743466	1.667	0.215007	0.364756	0.76001
AT3G09490.1	2.149	0.246011	0.403295	0.74856	2.258	0.267532	0.412627	0.727142
AT5G66210.4	1.509	0.343337	0.364551	0.576869	2.126	0.329802	0.448884	0.682447
AT5G66210.1	1.915	0.364708	0.369581	0.553964	2.305	0.415206	0.501458	0.63296
AT4G13430.1	1.447	0.387542	0.342219	0.493481	1.727	0.402946	0.411695	0.561708
AT5G66210.3	1.548	0.342623	0.369793	0.584249	2.348	0.392105	0.507322	0.659615
AT5G22330.1	1.431	0.304965	0.367492	0.632002	1.576	0.305412	0.385911	0.652313
AT3G17170.1	1.449	0.452118	0.357632	0.450918	1.836	0.481175	0.410851	0.4827
AT1G06960.1	1.502	0.29541	0.378159	0.65747	2.038	0.272934	0.39492	0.702604
AT5G59613.2	1.514	0.483884	0.402992	0.471053	1.652	0.41264	0.467212	0.605172
AT1G06960.3	1.524	0.308887	0.387383	0.649122	2.041	0.27715	0.397937	0.700162
AT1G06960.2	1.452	0.289396	0.374311	0.661358	2.057	0.264456	0.392763	0.713692
AT3G24515.1	2.013	0.247638	0.378737	0.724545	2.052	0.270505	0.413297	0.725054
AT1G02050.1	1.843	0.249293	0.383105	0.722187	1.787	0.229724	0.368381	0.740608
AT4G26080.1	2.456	0.332075	0.42464	0.653652	1.127	0.244299	0.284492	0.619234
AT3G52150.2	1.616	0.429033	0.35098	0.459375	2.201	0.47316	0.439671	0.517953
AT3G52150.1	1.599	0.426217	0.346706	0.457316	2.158	0.454715	0.428505	0.523942
AT4G15820.1	1.43	0.299615	0.359637	0.630725	1.443	0.297643	0.339006	0.604881
AT2G43410.3	2.242	0.276558	0.395025	0.699164	1.643	0.260702	0.361581	0.688256
AT3G52890.1	1.939	0.267557	0.408184	0.72239	1.999	0.249106	0.390644	0.733762
AT5G09590.1	1.835	0.294219	0.37144	0.649537	1.699	0.26562	0.33939	0.655147
AT1G62422.1	1.824	0.281778	0.413738	0.711464	1.691	0.24467	0.379669	0.731212
AT3G12570.1	1.659	0.29858	0.384272	0.658059	1.567	0.27404	0.383573	0.694184
AT3G12570.3	1.669	0.300939	0.386564	0.657284	1.57	0.274512	0.384322	0.694274
AT3G12570.2	1.691	0.307217	0.391622	0.65414	1.572	0.276186	0.385179	0.692687
AT3G12570.4	1.683	0.304202	0.38965	0.656131	1.56	0.273531	0.382027	0.693285
AT5G55070.1	1.661	0.308409	0.389501	0.650708	1.534	0.259221	0.343091	0.670406
AT4G02520.1	1.757	0.357063	0.379385	0.574503	2.033	0.385273	0.424454	0.589998
AT3G52140.4	1.951	0.298099	0.37774	0.650505	2.622	0.330964	0.449218	0.679284
AT2G40830.3	1.888	0.256542	0.390704	0.721931	1.4	0.222234	0.346612	0.736742
AT2G40830.1	1.83	0.249678	0.378704	0.720231	1.404	0.223747	0.347819	0.735497
AT5G29000.1	1.687	0.288892	0.388965	0.677428	1.321	0.213596	0.278711	0.660979
AT3G52140.1	1.914	0.305613	0.37558	0.637507	2.553	0.338746	0.443485	0.663899
AT3G52140.2	1.943	0.302822	0.377585	0.643583	2.607	0.336532	0.448526	0.671865
AT5G29000.2	1.708	0.268727	0.384235	0.701613	1.338	0.197005	0.275332	0.68931
AT5G39840.1	1.976	0.234322	0.386384	0.750298	2.546	0.240577	0.414849	0.765707
AT1G10570.1	1.969	0.262331	0.385392	0.707358	1.694	0.244515	0.36408	0.716062
AT2G36000.2	1.877	0.355509	0.387115	0.581447	2.038	0.371732	0.444621	0.625342
AT1G10570.2	1.963	0.261662	0.38467	0.707788	1.687	0.24496	0.36245	0.713427
AT5G63310.1	1.506	0.380423	0.355897	0.517433	2.107	0.421476	0.407315	0.532189
AT5G53120.4	1.949	0.264641	0.398305	0.720662	1.076	0.209434	0.24102	0.609062
AT1G21240.1	3.216	0.146024	0.42614	0.902653	2.329	0.168701	0.360981	0.829298
AT2G05310.1	2.007	0.416692	0.37333	0.496872	1.825	0.414889	0.413925	0.549912
AT4G38090.4	1.775	0.294774	0.398563	0.676379	1.951	0.278277	0.435181	0.733847
AT2G42770.1	1.616	0.31193	0.38831	0.643923	2.063	0.322239	0.445232	0.685954
AT4G12970.1	1.747	0.328463	0.400521	0.635126	1.903	0.34934	0.46707	0.67312
AT4G38090.1	1.687	0.266546	0.374161	0.691875	1.903	0.261601	0.419119	0.742924
AT1G80810.2	2.064	0.272172	0.385914	0.693594	1.987	0.258297	0.367283	0.696488
AT4G38090.3	1.763	0.241558	0.372143	0.726363	1.921	0.203538	0.395804	0.804442
AT4G38090.2	1.87	0.254097	0.39213	0.727207	2.126	0.222194	0.437537	0.81027
AT3G22520.1	1.86	0.279193	0.374896	0.676253	2.028	0.263981	0.373551	0.696054
AT4G00026.1	1.683	0.357668	0.376345	0.571855	1.585	0.338762	0.375997	0.594763
AT5G50640.1	1.964	0.295693	0.385546	0.662243	2.524	0.295989	0.414407	0.686894
AT1G55330.1	1.417	0.3279	0.346198	0.563998	1.33	0.316657	0.325494	0.561313
AT1G48790.1	1.786	0.288167	0.386735	0.672752	1.676	0.260016	0.351291	0.677506
AT1G35460.1	1.991	0.328008	0.412697	0.641678	1.753	0.287561	0.346583	0.624317
AT1G49470.1	3.49	0.212417	0.417402	0.800778	1.871	0.175741	0.332288	0.79488
AT5G52280.1	1.747	0.33249	0.363619	0.586792	1.665	0.310428	0.330733	0.57612
AT1G73820.1	1.81	0.341368	0.393479	0.611158	1.747	0.309111	0.390802	0.652619
AT5G53120.3	1.967	0.267158	0.402223	0.720797	1.089	0.211357	0.243787	0.610058
AT1G75220.1	1.857	0.293003	0.370501	0.650091	2.048	0.310618	0.455715	0.708677
AT3G48560.1	1.636	0.396043	0.347259	0.488491	1.917	0.394564	0.393453	0.547479
AT1G16320.1	1.612	0.289752	0.369447	0.655578	1.308	0.274678	0.347451	0.653558
AT1G11430.1	1.749	0.390463	0.346899	0.49563	1.704	0.394618	0.374433	0.52485
AT4G01100.2	1.724	0.326306	0.374567	0.612577	1.384	0.281298	0.34626	0.642175
AT4G01100.1	1.711	0.373904	0.383729	0.563447	1.383	0.328393	0.358482	0.589702
AT3G62220.1	2.06	0.2643	0.385369	0.705389	2.156	0.245679	0.425511	0.769637
AT2G47640.4	1.538	0.369977	0.374754	0.54152	1.484	0.406544	0.373711	0.512773
AT1G61310.1	1.89	0.231442	0.374093	0.747022	1.815	0.236146	0.36866	0.733147
AT1G07810.1	1.86	0.260365	0.368917	0.694094	1.539	0.238058	0.321532	0.677949
AT1G80500.1	1.498	0.296477	0.351179	0.622669	1.663	0.317636	0.366608	0.608075
AT2G47640.1	1.559	0.394129	0.378883	0.51915	1.509	0.423971	0.38083	0.502897
AT2G47640.2	1.589	0.417817	0.385216	0.502761	1.529	0.426024	0.395314	0.517587
AT2G47640.3	1.575	0.395976	0.38302	0.523032	1.511	0.412172	0.390386	0.526501
AT5G57760.1	1.299	0.280076	0.347711	0.643397	1.888	0.317866	0.48098	0.722694
AT1G68590.1	1.729	0.406928	0.36176	0.492281	1.587	0.438493	0.410808	0.522709
AT1G68590.2	1.725	0.392288	0.375666	0.52739	1.501	0.415913	0.423899	0.561806
AT3G19180.2	2.435	0.207958	0.399829	0.79899	3.266	0.215836	0.445904	0.821505
AT2G18160.1	1.714	0.36016	0.398167	0.594448	3.114	0.458534	0.629145	0.684328
AT1G75510.1	1.447	0.328839	0.355288	0.583724	1.588	0.320047	0.350991	0.589668
AT4G30160.2	1.947	0.278148	0.387141	0.690465	1.872	0.266545	0.365629	0.68358
AT1G68725.1	1.867	0.237103	0.363198	0.726581	1.887	0.27396	0.411551	0.722327
AT1G73230.1	1.419	0.376196	0.350419	0.519048	1.752	0.425474	0.419365	0.542364
AT1G66410.2	2.007	0.395302	0.386608	0.538055	1.945	0.386085	0.398289	0.560909
AT1G66410.1	1.792	0.394209	0.338424	0.480745	1.746	0.407756	0.367656	0.502899
AT1G04430.2	1.692	0.364683	0.367902	0.550515	2.017	0.365384	0.380814	0.564834
AT4G12040.2	1.883	0.397611	0.46391	0.612797	2.877	0.382381	0.471849	0.629586
AT5G07470.1	1.523	0.392458	0.390438	0.548907	1.503	0.333878	0.367026	0.593251
AT4G12040.1	1.672	0.354336	0.412272	0.611648	2.609	0.352758	0.429489	0.624121
AT4G27280.1	1.25	0.387978	0.355426	0.513955	1.642	0.430174	0.451625	0.575388
AT1G76800.1	1.88	0.365796	0.412775	0.602839	2.026	0.411562	0.509075	0.641007
AT1G69230.1	1.847	0.328763	0.455779	0.687972	1.3	0.283675	0.360234	0.65519
AT5G38600.1	1.769	0.325147	0.386515	0.624466	1.579	0.315465	0.389085	0.642538
AT5G65310.1	1.551	0.351198	0.367407	0.566954	1.908	0.34374	0.364949	0.576101
AT3G11170.1	1.656	0.387638	0.365265	0.521171	2.498	0.371676	0.388351	0.563668
AT1G26760.1	2.164	0.270509	0.394131	0.705108	2.121	0.27162	0.424212	0.732469
AT1G76820.1	2.103	0.29593	0.379642	0.655796	1.973	0.27323	0.355389	0.659267
AT3G58640.2	1.975	0.283522	0.394413	0.687938	2.173	0.273426	0.410134	0.714755
AT5G53460.2	2.094	0.322903	0.36613	0.603652	1.783	0.302227	0.350307	0.615146
AT3G54400.1	1.789	0.295034	0.372112	0.649986	1.685	0.287951	0.38673	0.67693
AT1G24040.1	2.454	0.28604	0.435205	0.720126	1.918	0.283091	0.438209	0.725222
AT4G35830.1	1.695	0.370021	0.367402	0.543645	1.816	0.393906	0.431938	0.591738
AT4G22140.1	2.172	0.273967	0.394013	0.693474	2.446	0.280644	0.470453	0.759894
AT4G22140.2	2.04	0.320446	0.385096	0.620843	2.204	0.324375	0.443884	0.681423
AT2G33730.1	1.823	0.360874	0.366389	0.553613	1.651	0.331079	0.361915	0.589034
AT3G26782.1	1.663	0.220833	0.378969	0.769301	2.2	0.204609	0.356227	0.770417
AT4G33666.1	1.476	0.388772	0.402023	0.56526	1.286	0.329874	0.350057	0.576662
AT4G21810.1	1.917	0.270369	0.382421	0.692242	1.976	0.286913	0.439358	0.727755
AT5G11260.1	1.835	0.31043	0.409668	0.665712	1.199	0.254981	0.32944	0.661484
AT4G05420.1	1.755	0.293517	0.380703	0.659475	1.99	0.28599	0.408312	0.700593
AT4G05420.2	1.747	0.292178	0.380275	0.661147	1.983	0.284657	0.408277	0.702699
AT3G01540.3	2.014	0.3371	0.363568	0.577277	1.816	0.32534	0.362981	0.596739
AT3G01540.4	1.987	0.33053	0.358412	0.579663	1.817	0.327233	0.363771	0.595217
AT4G18390.1	1.556	0.275398	0.400259	0.707497	1.743	0.232802	0.372542	0.744054
AT3G07950.1	1.965	0.264847	0.398267	0.713926	1.571	0.229153	0.346495	0.722743
AT3G55260.1	1.961	0.292332	0.383586	0.660344	2.089	0.305215	0.417257	0.679655
AT5G56950.1	1.716	0.388578	0.382939	0.542852	2.26	0.428961	0.429859	0.548319
AT3G24120.2	1.724	0.330057	0.400472	0.632489	1.911	0.323479	0.410362	0.652013
AT3G24120.1	1.508	0.305262	0.365763	0.625865	1.648	0.308426	0.374861	0.635298
AT1G50490.1	1.694	0.27755	0.396111	0.703517	1.754	0.297064	0.429821	0.708651
AT1G65470.2	1.905	0.256801	0.379084	0.709212	2.284	0.283867	0.410654	0.702304
AT3G23600.2	1.598	0.348663	0.368658	0.570917	1.633	0.31466	0.337988	0.57663
AT3G23600.1	1.602	0.379457	0.364641	0.527594	1.621	0.337171	0.330371	0.535652
AT1G54050.1	1.358	0.299667	0.337751	0.602944	1.704	0.344487	0.465932	0.683497
AT2G39930.1	2.089	0.285868	0.382097	0.671412	1.819	0.269872	0.396971	0.712346
AT2G38810.3	1.778	0.340601	0.393013	0.612063	2.041	0.347944	0.503224	0.708614
AT2G38810.2	1.738	0.334629	0.384001	0.609706	2.002	0.344385	0.494478	0.705592
AT2G38810.1	1.778	0.340103	0.393079	0.612745	2.017	0.341883	0.496995	0.710717
AT5G10400.1	1.382	0.351903	0.344473	0.536597	1.695	0.404478	0.42491	0.571359
AT4G22320.1	1.659	0.371307	0.386572	0.565551	1.309	0.308375	0.322583	0.570508
AT4G22320.2	1.663	0.394586	0.39498	0.549832	1.323	0.330408	0.33496	0.557415
AT4G23600.1	2.02	0.326358	0.38196	0.613369	1.478	0.241956	0.26846	0.594285
AT1G65280.1	1.431	0.337131	0.353696	0.569419	1.712	0.345199	0.353254	0.562099
AT4G23600.3	2.08	0.310079	0.389507	0.643473	1.495	0.228899	0.27026	0.620504
AT1G13880.1	2.035	0.32187	0.390622	0.631044	1.947	0.312796	0.396825	0.651288
AT3G26510.4	1.812	0.362181	0.393631	0.585719	2.301	0.451239	0.568457	0.648278
AT3G26510.5	1.973	0.330501	0.425118	0.658924	2.521	0.416214	0.599949	0.704184
AT4G15130.1	1.805	0.373248	0.384332	0.557581	1.702	0.360719	0.389244	0.583418
AT3G47370.1	1.484	0.322211	0.346636	0.581324	1.279	0.283094	0.310714	0.590649
AT3G26510.1	1.858	0.398077	0.41271	0.56512	2.375	0.485132	0.57889	0.624809
AT3G26510.2	1.827	0.354549	0.393885	0.595328	2.307	0.449975	0.571351	0.651781
AT3G26510.3	1.915	0.37211	0.413026	0.594941	2.396	0.458086	0.595188	0.661934
AT3G46610.1	1.802	0.331928	0.377323	0.604927	1.725	0.328021	0.38599	0.620897
AT2G15280.2	1.513	0.204253	0.348522	0.766044	1.492	0.171099	0.305592	0.776201
AT2G15280.1	1.519	0.223065	0.351389	0.736166	1.498	0.197996	0.327876	0.753479
AT2G30260.1	1.53	0.347059	0.378979	0.590481	1.687	0.329928	0.40149	0.631539
AT1G12880.1	2.206	0.324493	0.441964	0.670241	2.059	0.322768	0.430954	0.665796
AT4G32570.1	1.775	0.284067	0.389932	0.681511	1.983	0.292827	0.42073	0.702584
AT5G14740.5	1.871	0.424682	0.399983	0.524217	2.265	0.445808	0.489218	0.591019
AT5G65620.1	1.875	0.334233	0.363322	0.584615	2.096	0.363325	0.432971	0.627686
AT1G72250.1	2.439	0.224153	0.388123	0.769854	2.319	0.228488	0.404495	0.777652
AT1G72250.2	2.337	0.236774	0.389904	0.75236	2.246	0.244348	0.412261	0.76174
AT1G14410.1	1.808	0.279699	0.373644	0.67354	1.971	0.309629	0.411489	0.671214
AT2G30200.2	1.597	0.320842	0.381379	0.623613	1.694	0.285075	0.375368	0.669303
AT3G16180.1	1.692	0.266853	0.381523	0.701231	3.015	0.25061	0.427659	0.760853
AT2G30200.1	1.526	0.323241	0.357979	0.592401	1.624	0.292572	0.359317	0.639467
AT1G63120.1	1.626	0.259784	0.391035	0.720597	1.67	0.257177	0.393348	0.725061
AT4G34030.1	1.738	0.331405	0.376646	0.605666	1.915	0.349879	0.42691	0.63732
AT2G41750.1	1.534	0.271326	0.378704	0.68864	1.337	0.237807	0.332679	0.695101
AT4G22930.1	1.93	0.318389	0.391879	0.635398	2.22	0.309511	0.448699	0.703704
AT3G47910.2	1.9	0.264646	0.364582	0.682119	1.613	0.247481	0.337097	0.681117
AT4G37310.1	1.814	0.24364	0.390611	0.744219	1.268	0.202763	0.289053	0.70189
AT3G60380.1	2.167	0.245684	0.379826	0.727939	2.129	0.247695	0.403361	0.749277
AT5G16070.1	1.746	0.31426	0.389696	0.642054	1.884	0.320289	0.402105	0.64665
AT4G33650.2	2.387	0.26114	0.401882	0.723662	2.289	0.233112	0.376002	0.742069
AT1G78570.1	1.714	0.314606	0.375031	0.624619	1.451	0.271428	0.314712	0.61603
AT4G33650.1	2.341	0.259393	0.394695	0.719151	2.228	0.231809	0.369234	0.737967
AT1G27350.1	1.061	0.300645	0.344776	0.612602	1.209	0.225093	0.301523	0.666537
AT5G64360.4	1.851	0.287649	0.391154	0.677983	2.157	0.286712	0.435092	0.722053
AT5G64360.3	1.795	0.288184	0.382684	0.668116	2.133	0.291675	0.437168	0.717439
AT5G64360.2	1.922	0.302049	0.407201	0.674509	2.252	0.300223	0.455344	0.722203
AT5G64360.1	2.047	0.275497	0.408979	0.711512	2.4	0.263769	0.45541	0.76834
AT2G30950.1	1.534	0.419818	0.349304	0.470377	1.879	0.424228	0.396883	0.519835
AT1G18700.2	1.853	0.245573	0.384138	0.735455	1.781	0.238753	0.384605	0.74617
AT1G18700.3	1.781	0.223164	0.365324	0.752364	1.722	0.221463	0.369012	0.758677
AT1G18700.1	1.791	0.250573	0.381118	0.725138	1.712	0.23963	0.373908	0.734536
AT1G68190.1	1.953	0.292413	0.374658	0.656049	3.088	0.333447	0.523849	0.72995
AT1G18700.4	1.789	0.242504	0.378413	0.735087	1.711	0.232497	0.371186	0.743207
AT1G53885.1	1.672	0.328301	0.398254	0.627786	1.527	0.340565	0.436695	0.659305
AT5G63840.1	1.749	0.283625	0.366512	0.659551	1.484	0.267394	0.336514	0.648366
AT3G10040.1	1.95	0.303064	0.405854	0.674533	2.495	0.375974	0.553689	0.71372
AT1G69250.1	1.747	0.301307	0.397121	0.667188	1.754	0.294445	0.395451	0.674635
AT1G69250.2	1.721	0.261762	0.377671	0.704602	1.673	0.237613	0.3576	0.719529
AT3G03460.1	1.568	0.244342	0.385937	0.739021	1.301	0.215543	0.316776	0.713939
AT3G58670.1	1.653	0.296914	0.418688	0.694267	1.832	0.291652	0.407498	0.692136
AT1G72640.2	2.018	0.395318	0.380249	0.526652	2.423	0.439336	0.511169	0.613043
AT3G11630.1	1.613	0.435045	0.332287	0.428955	1.871	0.442772	0.393502	0.494651
AT2G47840.1	1.633	0.336143	0.380874	0.602806	1.512	0.322667	0.394712	0.63529
AT2G19450.1	1.862	0.245192	0.383321	0.733724	1.863	0.238112	0.402312	0.762854
AT3G54090.1	1.662	0.37254	0.353922	0.525973	1.571	0.36817	0.362201	0.544061
AT2G33770.1	1.833	0.296008	0.382784	0.659934	2.017	0.280298	0.395043	0.696026
AT3G59310.1	2.222	0.297709	0.413862	0.683018	2.552	0.32839	0.498635	0.719311
AT5G53770.1	1.636	0.287421	0.378646	0.66903	2.193	0.267189	0.37615	0.692888
AT5G39350.1	1.771	0.225109	0.367394	0.748533	1.892	0.242678	0.382272	0.735267
AT1G08180.1	1.464	0.345543	0.403477	0.617713	1.395	0.334899	0.386683	0.615429
AT5G57930.1	1.884	0.336839	0.37888	0.596455	1.512	0.32118	0.361338	0.602307
AT5G57930.2	1.884	0.339871	0.376893	0.589601	1.525	0.328282	0.36319	0.59471
AT5G52370.1	1.551	0.326092	0.3838	0.621505	1.247	0.282004	0.326897	0.614215
AT1G20510.1	1.555	0.327524	0.362129	0.593847	2.264	0.33806	0.396648	0.616459
AT1G20510.2	1.597	0.335539	0.369891	0.593548	2.352	0.325639	0.395188	0.632684
AT5G14570.1	2.081	0.254203	0.392263	0.728234	1.693	0.241912	0.367639	0.722692
AT1G25450.1	1.699	0.296275	0.379165	0.656374	1.739	0.296714	0.408519	0.686996
AT2G17530.2	1.977	0.246392	0.372017	0.720098	1.496	0.210459	0.333218	0.739453
AT5G09740.1	1.643	0.334895	0.378853	0.603747	1.987	0.348194	0.406282	0.614142
AT2G44620.1	1.553	0.374517	0.390614	0.569879	1.303	0.352161	0.374322	0.578426
AT4G35110.4	2.051	0.239677	0.376109	0.736667	2.012	0.222625	0.333246	0.714775
AT4G35110.3	2.078	0.24208	0.379157	0.735801	2.011	0.220217	0.332692	0.718446
AT4G35110.2	2.069	0.246489	0.380663	0.73051	1.994	0.222066	0.331596	0.713588
AT4G35110.1	2.078	0.246049	0.381585	0.732179	2.007	0.223877	0.333938	0.713204
AT2G42590.3	1.449	0.352466	0.366523	0.566007	1.769	0.35634	0.402486	0.602103
AT2G42590.2	1.509	0.375532	0.355052	0.520112	1.702	0.385633	0.400378	0.564934
AT2G42590.1	1.479	0.376419	0.35221	0.515001	1.662	0.386769	0.391849	0.55373
AT4G26640.2	1.776	0.260473	0.375518	0.704668	1.679	0.261847	0.356292	0.680557
AT1G16880.2	1.648	0.390095	0.380201	0.534223	1.601	0.375312	0.395023	0.574122
AT1G16880.1	1.853	0.415254	0.374517	0.499426	1.404	0.390419	0.372925	0.532245
AT2G27450.2	1.762	0.278745	0.389158	0.692793	2.264	0.293612	0.428445	0.707602
AT4G09180.1	1.681	0.328896	0.386805	0.617634	1.334	0.271613	0.326072	0.630237
AT5G46390.2	2.16	0.275606	0.387272	0.689199	1.91	0.270689	0.424099	0.736788
AT1G28420.1	2.623	0.255409	0.382323	0.713605	2.308	0.249758	0.369528	0.712594
AT5G46390.1	1.897	0.253201	0.381714	0.719344	1.846	0.255097	0.416382	0.752729
AT2G21620.2	1.742	0.347813	0.376053	0.58433	1.294	0.302134	0.336518	0.597573
AT4G35100.1	1.676	0.42855	0.357123	0.464019	1.531	0.434698	0.385657	0.498594
AT4G35100.2	1.713	0.423035	0.367478	0.482001	1.556	0.43333	0.394369	0.51015
AT2G21620.1	1.64	0.396792	0.365568	0.514247	1.235	0.35471	0.334999	0.526099
AT4G00950.1	1.534	0.325697	0.373563	0.61019	1.736	0.330952	0.406644	0.640578
AT1G32790.1	1.706	0.355691	0.38581	0.586633	1.562	0.324	0.38424	0.62736
AT4G00090.1	1.597	0.308402	0.373654	0.633038	1.625	0.273074	0.340893	0.645206
AT1G29970.1	1.441	0.324744	0.392537	0.634038	1.821	0.296121	0.427084	0.705171
AT3G18000.1	1.894	0.302161	0.394492	0.663562	1.197	0.249865	0.290077	0.616266
AT1G29970.2	1.407	0.302691	0.369852	0.637854	1.722	0.282336	0.375363	0.671641
AT5G57700.3	1.616	0.272382	0.376232	0.687711	1.684	0.261904	0.388182	0.713994
AT5G57700.2	1.629	0.279635	0.381224	0.682383	1.704	0.271083	0.395365	0.707594
AT5G57700.1	1.64	0.278946	0.382459	0.684718	1.703	0.26759	0.393469	0.710855
AT2G02230.1	1.578	0.346027	0.36064	0.565997	1.683	0.340426	0.401415	0.61774
AT5G10870.1	1.401	0.276151	0.37566	0.682209	1.524	0.256662	0.359287	0.693449
AT5G57700.4	1.601	0.274252	0.374478	0.683036	1.668	0.264528	0.386793	0.708625
AT1G29950.2	1.567	0.294581	0.393511	0.676143	1.782	0.30699	0.408618	0.672532
AT1G29950.1	1.525	0.295094	0.388667	0.670963	1.719	0.298034	0.400734	0.676601
AT3G07060.1	2.284	0.222335	0.407339	0.785086	2.422	0.214842	0.418651	0.805052
AT1G64140.1	1.734	0.31967	0.378558	0.621828	1.539	0.294636	0.344381	0.616224
AT1G19010.1	2.092	0.297141	0.402413	0.676185	2.084	0.291378	0.402888	0.684055
AT4G33630.1	1.606	0.340448	0.368969	0.586343	1.638	0.334844	0.380659	0.60725
AT4G33630.2	1.637	0.339079	0.375359	0.595913	1.683	0.341211	0.390466	0.610206
AT3G51420.1	1.945	0.330925	0.377097	0.60458	2.091	0.334499	0.403804	0.63128
AT3G48760.1	1.553	0.315242	0.368439	0.617751	1.798	0.319854	0.383116	0.626584
AT1G17880.1	1.634	0.381287	0.351949	0.510162	1.725	0.377884	0.386368	0.558885
AT1G36980.1	1.831	0.371175	0.389799	0.564741	1.757	0.326663	0.372457	0.600544
AT5G62190.1	1.624	0.370874	0.358341	0.533966	1.641	0.33946	0.343743	0.55417
AT2G38950.1	2.006	0.26387	0.384069	0.707583	1.828	0.261591	0.372748	0.698754
AT1G32220.1	2.044	0.358144	0.392794	0.586542	1.896	0.37324	0.431532	0.612852
AT4G24830.2	1.738	0.305532	0.380889	0.643096	2.055	0.302969	0.424063	0.692282
AT5G10660.2	7	0.192896	1.08735	0.971647	7	0.331007	1.45651	0.952465
AT2G14120.1	2.113	0.279525	0.382663	0.681519	1.901	0.288913	0.38533	0.672987
AT4G17330.1	1.885	0.282488	0.381576	0.675979	1.934	0.270634	0.379036	0.691084
AT2G14120.2	2.116	0.279499	0.382762	0.68161	1.898	0.287219	0.383995	0.673935
AT1G07350.1	1.743	0.28969	0.38622	0.673689	1.616	0.243772	0.329793	0.679883
AT4G02890.1	1.527	0.362523	0.363234	0.551228	1.537	0.313441	0.336557	0.583342
AT4G02890.2	1.543	0.353116	0.363239	0.562208	1.227	0.319034	0.327698	0.56452
AT1G07350.2	1.5	0.231351	0.348287	0.72005	1.079	0.217299	0.313479	0.707508
AT4G02890.4	1.487	0.378626	0.356393	0.524186	1.556	0.338327	0.335276	0.547018
AT3G26980.1	1.984	0.387016	0.423202	0.586117	1.917	0.458737	0.535197	0.620646
AT2G41231.1	7	0.200393	1.10971	0.970372	7	0.257669	1.31806	0.96319
AT3G17120.2	1.9	0.331137	0.425824	0.656493	1.463	0.300284	0.366691	0.639002
AT1G74510.1	2.219	0.290169	0.414054	0.695386	1.86	0.273824	0.371257	0.676805
AT5G25280.1	2.102	0.374178	0.391534	0.566862	1.66	0.416605	0.446116	0.579473
AT1G74510.2	2.296	0.30244	0.429556	0.693582	1.921	0.284624	0.384193	0.675043
AT5G13810.1	1.855	0.332974	0.422794	0.650885	1.543	0.292613	0.371756	0.65145
AT4G09890.1	1.518	0.289971	0.370512	0.655868	1.522	0.252043	0.379886	0.724432
AT4G27990.1	1.585	0.32017	0.389904	0.635074	1.307	0.267661	0.309831	0.616519
AT1G22690.1	1.447	0.353399	0.365852	0.561107	2.262	0.449716	0.550362	0.63624
AT3G52850.1	1.835	0.35814	0.369413	0.561383	1.785	0.331775	0.341027	0.559293
AT1G74910.1	1.473	0.351213	0.379256	0.585167	2.143	0.368883	0.450292	0.634777
AT3G04730.1	1.531	0.365941	0.380836	0.567047	2.047	0.410589	0.472189	0.608646
AT1G74910.3	1.489	0.359884	0.383838	0.579253	2.049	0.364951	0.441253	0.631439
AT1G74910.2	1.46	0.342756	0.375757	0.591943	2.127	0.362766	0.4459	0.637617
AT1G51720.1	1.643	0.299712	0.368033	0.636982	1.808	0.302462	0.398159	0.666063
AT2G44360.1	1.578	0.348714	0.367396	0.567984	1.793	0.365558	0.417262	0.604438
AT2G44680.1	1.485	0.238728	0.368954	0.729639	1.828	0.214685	0.352929	0.749659
AT5G03540.1	2.115	0.309912	0.382337	0.640973	1.705	0.324854	0.393657	0.634603
AT5G03540.2	2.142	0.337708	0.401226	0.625437	1.73	0.363346	0.41502	0.609786
AT2G44680.2	1.492	0.229015	0.366751	0.743046	1.851	0.211255	0.349607	0.751186
AT5G05950.1	2.223	0.251675	0.414191	0.74871	2.172	0.226916	0.40139	0.774126
AT3G43300.1	1.855	0.264985	0.373118	0.693371	1.761	0.245024	0.359734	0.710982
AT4G38490.1	1.854	0.318219	0.400952	0.649208	1.54	0.278796	0.380596	0.680184
AT5G60390.2	1.547	0.398307	0.334097	0.46748	1.546	0.399457	0.364553	0.511905
AT3G46670.1	1.898	0.272349	0.390843	0.69619	1.144	0.197034	0.244747	0.64337
AT1G30580.1	1.63	0.365759	0.368731	0.552074	1.55	0.362346	0.37083	0.562841
AT4G16950.1	1.697	0.307785	0.370844	0.631128	2.637	0.358314	0.481131	0.674223
AT5G60390.3	1.568	0.39545	0.332835	0.469277	1.575	0.406535	0.364313	0.504173
AT1G75760.1	1.754	0.318578	0.415829	0.662512	1.604	0.27891	0.366729	0.666659
AT5G42000.2	1.685	0.26489	0.372619	0.692481	1.438	0.267305	0.391838	0.713408
AT5G45710.2	2.134	0.328868	0.454319	0.687406	2.267	0.316922	0.46806	0.712946
AT4G34090.1	1.723	0.443672	0.432102	0.537972	2.33	0.472107	0.545021	0.61059
AT4G34090.3	1.497	0.307994	0.379047	0.642702	2.14	0.320382	0.461303	0.702531
AT4G34090.2	1.763	0.441214	0.432492	0.540715	2.285	0.469806	0.537014	0.606464
AT5G45710.1	2.12	0.272779	0.420039	0.72914	2.27	0.268707	0.434733	0.746128
AT5G20280.1	1.664	0.350394	0.363534	0.566069	1.563	0.335222	0.356096	0.577167
AT2G43770.1	1.976	0.298875	0.380564	0.649306	2.183	0.303107	0.435199	0.702283
AT2G39720.1	1.8	0.287066	0.388105	0.678097	1.706	0.25147	0.354921	0.692471
AT3G53670.1	1.398	0.261674	0.357001	0.683765	1.646	0.305843	0.416092	0.680705
AT3G53670.2	1.448	0.274655	0.370598	0.679285	1.691	0.314853	0.427427	0.679835
AT3G50910.1	1.846	0.300134	0.407245	0.677272	1.431	0.211015	0.292867	0.689456
AT3G57230.2	1.56	0.240751	0.385089	0.746289	1.474	0.211096	0.334837	0.740211
AT4G36870.1	1.989	0.277518	0.378986	0.680956	1.867	0.261919	0.359491	0.684136
AT4G36870.2	2.014	0.285021	0.384819	0.676333	1.861	0.259969	0.357853	0.685268
AT1G11790.1	1.784	0.262527	0.395862	0.720604	1.911	0.259471	0.397401	0.72774
AT3G06070.1	1.506	0.381179	0.360931	0.526506	2.447	0.460567	0.536458	0.614492
AT2G06510.2	1.827	0.263374	0.387543	0.709832	1.473	0.238082	0.332699	0.691268
AT1G24180.1	1.539	0.335625	0.377595	0.599721	1.582	0.337325	0.377171	0.599953
AT1G59710.1	2.043	0.348356	0.442786	0.652789	1.853	0.319606	0.409564	0.651297
AT3G01710.1	1.687	0.300099	0.395676	0.665933	2.123	0.344123	0.451993	0.662891
AT5G10180.1	1.444	0.293744	0.351847	0.628784	1.529	0.259388	0.33125	0.655812
AT3G01710.2	1.751	0.301817	0.398749	0.66598	2.054	0.346678	0.451442	0.660957
AT3G51830.1	2.007	0.279702	0.38954	0.687315	2.074	0.285719	0.392305	0.684396
AT5G12040.2	2.076	0.22814	0.357863	0.728801	2.043	0.253907	0.369684	0.703699
AT4G02200.1	1.981	0.390344	0.430738	0.587031	2.737	0.410234	0.561951	0.67963
AT1G17145.1	1.551	0.320793	0.383204	0.626923	1.752	0.322777	0.418116	0.660845
AT4G02200.3	2.068	0.344561	0.442393	0.652937	2.821	0.365682	0.566123	0.728731
AT5G57815.1	1.862	0.44086	0.423047	0.525451	1.586	0.409807	0.429558	0.571997
AT2G30520.3	1.749	0.269988	0.38306	0.698162	2.262	0.260417	0.420323	0.744876
AT2G30520.2	1.799	0.276117	0.393013	0.699365	2.35	0.273068	0.437989	0.742666
AT2G30520.1	1.704	0.262292	0.371934	0.697915	2.251	0.265918	0.424573	0.740268
AT1G08420.2	2.098	0.271122	0.375155	0.685095	1.924	0.266328	0.361393	0.677963
AT5G53800.1	1.511	0.399111	0.354981	0.497979	1.338	0.35737	0.289366	0.458072
AT1G08420.1	2.047	0.267327	0.366164	0.68088	1.88	0.264066	0.353496	0.672208
AT4G26965.2	1.706	0.251937	0.384286	0.724107	1.344	0.210895	0.34464	0.751398
AT4G26965.1	1.662	0.288777	0.399534	0.687958	1.729	0.268986	0.403854	0.720085
AT3G05880.1	1.338	0.480877	0.361541	0.425386	1.199	0.408677	0.311649	0.430188
AT5G48630.1	1.826	0.300692	0.376855	0.642403	1.46	0.276906	0.353451	0.657163
AT2G34585.1	1.389	0.411221	0.392742	0.530069	1.683	0.347473	0.390189	0.585012
AT5G48230.1	1.714	0.342905	0.406216	0.622406	2.267	0.344573	0.436046	0.649138
AT4G24330.1	2.056	0.339021	0.385333	0.603656	1.795	0.320212	0.369947	0.610063
AT3G12955.1	2.466	0.132732	0.458241	0.924721	2.389	0.192596	0.492608	0.874298
AT4G03415.2	1.748	0.279875	0.369291	0.669999	2.02	0.303878	0.396725	0.664062
AT2G30530.1	1.65	0.258085	0.378948	0.707316	1.896	0.241441	0.368239	0.719888
AT4G03415.1	1.734	0.275759	0.365973	0.672484	1.989	0.296704	0.390386	0.66737
AT5G02290.2	1.574	0.372021	0.377702	0.554596	1.776	0.406105	0.441723	0.586255
AT3G09770.1	1.782	0.343728	0.379314	0.589944	2.134	0.352299	0.386855	0.583756
AT1G50300.1	1.664	0.385283	0.379058	0.537564	1.789	0.381882	0.417112	0.587626
AT3G12600.2	1.686	0.401204	0.390994	0.53347	1.414	0.437845	0.413917	0.5284
AT3G12600.1	1.776	0.414885	0.40864	0.538012	1.492	0.449702	0.433584	0.537037
AT1G45231.2	1.862	0.273389	0.380533	0.68892	1.761	0.251981	0.353599	0.691096
AT4G24470.2	1.974	0.285287	0.418414	0.707776	1.89	0.274011	0.408197	0.714846
AT4G24470.3	2.033	0.254689	0.413989	0.747255	1.892	0.243923	0.395897	0.747203
AT4G24470.1	1.955	0.284034	0.414988	0.70627	1.805	0.263468	0.390219	0.712663
AT5G01460.1	1.995	0.252045	0.377288	0.716421	2.058	0.249305	0.417319	0.758314
AT5G11680.1	1.628	0.325724	0.369871	0.603643	1.606	0.306013	0.389556	0.654432
AT1G17980.2	1.56	0.222474	0.331582	0.715932	1.714	0.225644	0.353519	0.734602
AT5G17630.1	1.809	0.269088	0.387594	0.704659	1.568	0.232708	0.342075	0.712098
AT1G69060.1	2.156	0.256317	0.378187	0.709925	2.007	0.253518	0.380939	0.717594
AT3G15660.1	1.359	0.362502	0.38105	0.572991	1.603	0.322657	0.367291	0.604303
AT2G48160.1	1.878	0.281046	0.372564	0.668988	1.77	0.275151	0.360794	0.666255
AT1G53210.1	1.746	0.33569	0.378775	0.602888	1.775	0.299518	0.352911	0.617654
AT3G15660.2	1.364	0.355328	0.384804	0.586106	1.627	0.323408	0.372749	0.609934
AT3G02060.1	1.663	0.30124	0.377755	0.648376	1.882	0.285719	0.37816	0.668965
AT1G16410.1	2.01	0.309932	0.381354	0.635923	3.501	0.42504	0.624434	0.710941
AT1G16410.2	1.927	0.303867	0.380714	0.646448	3.261	0.41567	0.60671	0.709747
AT5G14430.1	1.747	0.301916	0.378382	0.645779	2.323	0.31264	0.442121	0.694849
AT5G14430.2	1.749	0.297441	0.378805	0.652679	2.329	0.307377	0.440676	0.700234
AT5G59880.2	1.353	0.367697	0.348799	0.523398	1.407	0.325643	0.324436	0.544514
AT1G79080.1	1.919	0.293539	0.371295	0.649945	1.711	0.266693	0.338936	0.650934
AT4G33480.1	1.518	0.380737	0.379777	0.549608	1.767	0.345089	0.375081	0.585225
AT3G47370.2	1.607	0.34415	0.374658	0.586527	1.407	0.307967	0.341374	0.594897
AT1G16470.2	1.793	0.336882	0.406312	0.63008	1.756	0.352574	0.449394	0.655668
AT5G64880.1	1.482	0.298294	0.377561	0.654438	1.998	0.270416	0.421206	0.735347
AT1G16470.1	1.717	0.329797	0.38935	0.620995	1.665	0.33705	0.427222	0.653305
AT3G52720.2	1.748	0.291778	0.418041	0.702648	1.782	0.273721	0.413	0.721931
AT5G50210.1	1.828	0.256566	0.376885	0.709669	1.781	0.237833	0.351997	0.712657
AT1G29890.1	2.03	0.238492	0.378433	0.74122	1.757	0.203381	0.327432	0.744785
AT1G78210.1	1.629	0.290309	0.385123	0.66994	1.873	0.274186	0.400685	0.711228
AT3G14980.1	2.086	0.229094	0.356222	0.731922	2.184	0.22072	0.339222	0.726274
AT2G47910.1	1.341	0.377033	0.373958	0.549632	1.599	0.345894	0.376925	0.589664
AT2G47910.2	1.394	0.375716	0.396592	0.577589	1.653	0.357935	0.400384	0.601668
AT1G42990.1	1.638	0.296699	0.378365	0.654556	1.263	0.244222	0.304634	0.646029
AT1G31150.1	1.952	0.216622	0.39184	0.782903	2.141	0.209897	0.39547	0.797829
AT1G04300.3	1.848	0.301858	0.372205	0.641284	1.92	0.298632	0.368236	0.643017
AT1G04300.2	1.869	0.309338	0.380471	0.640244	1.942	0.308333	0.376409	0.638917
AT3G16370.1	1.93	0.380931	0.385882	0.549515	1.936	0.3713	0.388883	0.566241
AT1G51570.1	1.693	0.316197	0.355764	0.597901	1.793	0.330319	0.381441	0.610315
AT5G48180.1	1.596	0.456968	0.362253	0.447958	1.007	0.305819	0.251166	0.467121
AT5G64220.1	2.093	0.232969	0.389396	0.754341	1.974	0.225416	0.378074	0.758574
AT2G40430.2	1.585	0.337966	0.365535	0.583599	1.567	0.335688	0.369767	0.593499
AT2G40430.3	1.55	0.343754	0.357613	0.566417	1.541	0.341254	0.367008	0.583067
AT5G43020.1	2.188	0.218598	0.387891	0.776123	2.285	0.237157	0.419367	0.77793
AT2G40430.1	1.568	0.349713	0.361795	0.563995	1.562	0.345504	0.368264	0.578614
AT2G16405.1	1.744	0.238238	0.372365	0.734079	1.744	0.21908	0.359673	0.751741
AT5G42100.2	1.792	0.316092	0.372408	0.622892	1.947	0.305169	0.41138	0.678013
AT5G42100.1	1.802	0.352345	0.376014	0.579072	1.959	0.335141	0.422205	0.649959
AT3G16310.1	1.605	0.322768	0.381696	0.622519	2.044	0.330935	0.411109	0.640411
AT1G07720.1	1.841	0.31873	0.378319	0.624921	1.231	0.244257	0.290259	0.625825
AT5G58470.2	1.652	0.432774	0.385024	0.495433	1.62	0.406308	0.388364	0.529523
AT5G63670.1	1.345	0.378579	0.368756	0.540356	1.468	0.39689	0.418852	0.573791
AT3G54640.1	1.835	0.306799	0.396246	0.661344	1.796	0.317858	0.446681	0.694245
AT5G63670.2	1.453	0.302229	0.402286	0.677755	1.57	0.304695	0.408593	0.677054
AT3G52520.1	1.611	0.257328	0.349493	0.678777	1.89	0.315843	0.447483	0.699414
AT5G54250.1	1.968	0.245634	0.378951	0.726234	1.727	0.22879	0.333906	0.705637
AT5G54250.2	2.008	0.249307	0.386269	0.727804	1.761	0.232533	0.340677	0.70735
AT5G54250.3	2.006	0.236194	0.380837	0.742836	1.752	0.221332	0.334217	0.718824
AT2G40410.1	1.901	0.222155	0.348396	0.730903	1.765	0.215962	0.34362	0.736647
AT2G40410.2	1.876	0.286942	0.382039	0.669834	1.87	0.293642	0.403648	0.685554
AT3G58970.1	2.128	0.295274	0.39226	0.667794	1.792	0.267617	0.34954	0.661001
AT1G25250.1	1.706	0.275319	0.371853	0.679841	1.322	0.231516	0.320253	0.689924
AT5G05060.1	1.486	0.335083	0.380613	0.607134	1.524	0.272652	0.341048	0.646994
AT2G38310.1	1.677	0.344142	0.369958	0.578006	2.428	0.388353	0.570653	0.712409
AT3G55630.3	1.847	0.302818	0.383086	0.646512	1.898	0.294865	0.390497	0.671427
AT1G58180.1	1.431	0.365607	0.371442	0.556605	1.762	0.386305	0.449067	0.61638
AT3G55630.1	1.843	0.287353	0.389177	0.675696	1.989	0.272116	0.392818	0.70538
AT1G58180.3	1.712	0.344542	0.360052	0.56868	1.816	0.373559	0.452658	0.631854
AT1G58180.4	1.631	0.358753	0.370548	0.563748	1.758	0.389068	0.451716	0.615304
AT2G36790.1	2.649	0.20013	0.399228	0.812477	1.598	0.171364	0.306442	0.780512
AT2G34430.1	1.911	0.432977	0.351187	0.456452	3.56	0.651335	0.683652	0.5707
AT3G27010.1	1.513	0.285383	0.394694	0.690226	1.482	0.272645	0.371631	0.681974
AT1G54580.1	1.832	0.381626	0.383378	0.547351	1.785	0.351197	0.396152	0.600326
AT2G01820.1	1.606	0.264236	0.375154	0.698386	2.089	0.265846	0.421408	0.740962
AT1G26830.1	1.597	0.331985	0.364241	0.590859	1.903	0.343583	0.379661	0.59188
AT2G47160.1	1.938	0.253802	0.401716	0.737706	1.91	0.242226	0.39009	0.745235
AT1G51140.1	1.444	0.223374	0.347401	0.73374	0.965	0.163061	0.197842	0.631915
AT2G47160.2	1.964	0.245089	0.402051	0.750954	1.933	0.234802	0.3903	0.756974
AT5G12210.2	1.389	0.308957	0.374468	0.634325	1.684	0.244548	0.345051	0.694575
AT5G55610.2	1.574	0.227855	0.360966	0.742318	1.438	0.223708	0.340862	0.727345
AT5G55610.1	1.73	0.314908	0.394437	0.646949	1.662	0.305689	0.387765	0.652861
AT5G12210.1	1.386	0.309333	0.374274	0.633632	1.672	0.247509	0.343392	0.687682
AT5G13730.1	1.371	0.378461	0.35889	0.529394	1.843	0.369157	0.36149	0.540391
AT1G20850.1	1.583	0.306958	0.375344	0.639044	1.506	0.297207	0.347845	0.618176
AT1G22160.1	1.716	0.339604	0.408546	0.628706	1.292	0.27963	0.348916	0.647336
AT2G18570.1	2.179	0.271606	0.396583	0.702022	1.88	0.268097	0.404093	0.717967
AT1G14380.2	1.928	0.271272	0.389312	0.701357	1.767	0.248611	0.365915	0.711798
AT1G14380.3	2.041	0.276972	0.38459	0.688227	1.641	0.262793	0.363657	0.687884
AT1G74970.1	1.617	0.404822	0.359635	0.492334	1.96	0.453412	0.458483	0.554902
AT1G14380.1	2.041	0.277685	0.384863	0.687434	1.641	0.264273	0.364403	0.686512
AT1G47530.1	1.763	0.304968	0.360185	0.617341	1.594	0.279014	0.354404	0.648968
AT3G16660.1	1.546	0.318469	0.379661	0.62348	3.08	0.351289	0.594515	0.761798
AT3G02680.1	2.476	0.208385	0.406399	0.805418	1.958	0.183261	0.357031	0.80799
AT3G62700.1	1.822	0.263749	0.373998	0.698565	1.8	0.246292	0.341545	0.68667
AT2G42910.1	1.463	0.319742	0.378731	0.625695	1.428	0.2973	0.368506	0.64434
AT4G02590.1	1.588	0.337094	0.388932	0.61012	1.466	0.278786	0.328706	0.619882
AT3G62650.2	1.636	0.40701	0.395997	0.539124	1.985	0.441757	0.465148	0.571949
AT5G55600.2	1.763	0.294473	0.376466	0.653444	1.856	0.255571	0.35897	0.691981
AT5G24530.1	1.821	0.272477	0.393521	0.705439	1.253	0.228048	0.278257	0.637675
AT4G08555.1	1.45	0.178391	0.347421	0.810812	0.778	0.129464	0.196161	0.723456
AT3G03140.1	1.909	0.266279	0.364284	0.679699	1.641	0.23748	0.340912	0.701679
AT5G58900.1	1.958	0.375963	0.418068	0.593987	2.466	0.446935	0.580272	0.662367
AT1G23440.1	1.596	0.348497	0.390687	0.594548	1.248	0.318068	0.356364	0.600315
AT4G27720.1	1.614	0.280589	0.377406	0.678552	1.521	0.268134	0.366555	0.68255
AT2G24570.1	1.888	0.2547	0.389031	0.724652	1.875	0.249461	0.375353	0.719044
AT4G00630.2	2.031	0.279372	0.383605	0.682635	1.702	0.258673	0.353806	0.684732
AT3G28300.1	1.702	0.381479	0.373688	0.539824	1.489	0.332041	0.304137	0.510105
AT3G44330.1	1.63	0.257866	0.381661	0.714236	1.552	0.211721	0.334317	0.738704
AT2G22010.1	2.4	0.226678	0.379466	0.752151	2.45	0.22227	0.37825	0.754104
AT2G22010.2	2.514	0.23624	0.397741	0.7544	2.565	0.231117	0.396231	0.756973
AT4G00630.1	2.009	0.285114	0.383079	0.67375	1.674	0.263415	0.350351	0.673064
AT4G27740.1	1.361	0.357626	0.378996	0.576093	1.542	0.358939	0.418734	0.614103
AT5G45390.1	1.476	0.386932	0.358698	0.51435	1.86	0.384624	0.40681	0.574267
AT1G15480.1	1.968	0.282333	0.392159	0.685462	2.841	0.299528	0.470901	0.729152
AT1G75440.1	1.678	0.337335	0.402838	0.627094	1.979	0.35985	0.484437	0.676996
AT3G50970.1	1.835	0.277555	0.371032	0.673098	0.51	0.119175	0.116414	0.541043
AT2G38640.1	1.673	0.274653	0.383928	0.69411	1.557	0.258606	0.352048	0.681461
AT3G45260.1	1.565	0.314377	0.380451	0.635722	1.508	0.324475	0.399162	0.643834
AT4G00355.1	1.761	0.352345	0.405152	0.609877	1.811	0.327165	0.415298	0.651744
AT4G00355.2	1.775	0.356145	0.408358	0.608621	1.813	0.327764	0.415955	0.651658
AT4G00355.3	1.814	0.358673	0.416776	0.614424	1.868	0.334312	0.427655	0.654982
AT4G00355.4	1.869	0.312703	0.407649	0.663712	1.851	0.277244	0.399464	0.701631
AT3G61060.1	1.745	0.26294	0.383356	0.708168	2.384	0.28797	0.478275	0.751178
AT3G45240.3	1.799	0.295948	0.403851	0.68122	1.7	0.297107	0.414862	0.690273
AT3G45240.2	1.745	0.306081	0.400934	0.664876	1.659	0.306153	0.409007	0.672547
AT3G48360.1	1.626	0.374126	0.346746	0.5114	2.612	0.475184	0.561492	0.622126
AT3G26710.1	1.577	0.381312	0.369143	0.534042	1.804	0.383967	0.401007	0.569278
AT3G14930.2	2.027	0.363697	0.372886	0.559568	2.162	0.427941	0.468018	0.589768
AT5G17160.1	2.013	0.294493	0.383102	0.661675	1.812	0.301213	0.395148	0.667277
AT3G21140.1	1.88	0.294773	0.392562	0.671901	1.598	0.270134	0.398071	0.714902
AT5G08470.1	2.043	0.246213	0.387399	0.735063	2.316	0.242996	0.394828	0.745461
AT1G26620.1	2.352	0.233612	0.393145	0.759415	2.289	0.198284	0.328001	0.748524
AT2G17350.1	1.502	0.496554	0.348581	0.399874	1.793	0.546427	0.43594	0.450856
AT1G78020.1	1.476	0.335091	0.35401	0.570543	1.581	0.302886	0.344084	0.600669
AT5G43720.1	1.613	0.336814	0.376821	0.5987	2.072	0.353655	0.40675	0.609824
AT1G50020.1	1.385	0.304803	0.371887	0.63795	1.511	0.276075	0.367433	0.67024
AT3G50210.2	1.645	0.350935	0.398555	0.606125	1.931	0.405799	0.491079	0.63264
AT3G50210.3	1.586	0.318789	0.380506	0.627717	1.868	0.355728	0.455887	0.65701
AT5G20680.2	2.228	0.269085	0.378912	0.690373	1.911	0.239291	0.355126	0.711885
AT3G57530.1	1.714	0.392213	0.365439	0.518447	2.172	0.438308	0.468659	0.579864
AT5G03710.1	1.279	0.321107	0.451941	0.679555	2.092	0.346255	0.442912	0.638114
AT3G07700.3	1.721	0.294006	0.382925	0.664419	1.292	0.254387	0.338365	0.675402
AT3G20100.1	1.567	0.264236	0.38023	0.703703	1.281	0.20821	0.264717	0.6546
AT2G17340.1	1.574	0.318479	0.372235	0.61773	1.645	0.30499	0.381703	0.648478
AT3G43720.1	1.377	0.336265	0.356344	0.574131	1.58	0.315022	0.392373	0.643914
AT2G30140.1	2.141	0.246486	0.376101	0.718909	1.228	0.186769	0.234937	0.645125
AT2G30140.2	2.14	0.245322	0.376552	0.721586	1.225	0.186792	0.234334	0.643796
AT5G56750.1	1.668	0.274081	0.381827	0.689176	1.625	0.228688	0.312614	0.681387
AT4G38225.3	2.036	0.313438	0.390743	0.642499	1.904	0.325994	0.44434	0.68349
AT4G38225.2	1.971	0.271704	0.367897	0.674896	1.8	0.253124	0.385863	0.724442
AT4G38225.1	1.932	0.32535	0.383933	0.616294	2.086	0.337162	0.435178	0.659141
AT3G05730.1	1.283	0.371925	0.310732	0.464198	3.532	0.754993	0.809132	0.576427
AT5G53940.1	1.412	0.367516	0.368246	0.550211	1.575	0.386543	0.4067	0.569319
AT5G03730.2	1.925	0.280479	0.368967	0.662977	1.901	0.249857	0.358228	0.700169
AT5G03730.1	1.913	0.282233	0.369133	0.660271	1.918	0.253695	0.3617	0.697976
AT3G18535.1	1.549	0.267907	0.337602	0.646509	2.09	0.276653	0.391929	0.690875
AT3G02720.1	1.718	0.301064	0.37543	0.643358	1.824	0.310627	0.384645	0.642065
AT5G56740.1	2.018	0.255547	0.387919	0.724415	2.466	0.250612	0.399939	0.739561
AT5G49015.2	1.507	0.370283	0.351474	0.520881	1.837	0.502504	0.514911	0.563211
AT1G20620.2	2.055	0.43851	0.366286	0.465454	2.168	0.450488	0.433718	0.529978
AT2G19430.1	1.632	0.280338	0.377136	0.676724	1.886	0.268455	0.399415	0.718236
AT5G14600.1	2.035	0.206759	0.390358	0.797436	2.533	0.194729	0.383792	0.803196
AT5G02500.2	1.983	0.366476	0.361168	0.53562	1.626	0.35528	0.360603	0.554292
AT2G18510.1	1.817	0.29852	0.376958	0.647885	1.859	0.273869	0.342153	0.643641
AT1G16260.1	1.979	0.287197	0.381508	0.669383	2.211	0.301742	0.45685	0.72221
AT5G09860.1	1.897	0.265164	0.392063	0.711106	2.086	0.275451	0.433559	0.735837
AT1G20620.1	2.032	0.432632	0.355675	0.457139	2.133	0.463925	0.416813	0.499401
AT3G25030.1	1.74	0.365909	0.39881	0.587833	1.708	0.31247	0.365815	0.61649
AT1G18300.1	1.558	0.41671	0.393975	0.526401	1.992	0.414906	0.468586	0.604175
AT4G08980.1	1.58	0.356735	0.397488	0.595446	1.531	0.302656	0.317864	0.56889
AT4G08980.2	1.679	0.379137	0.423402	0.596485	1.613	0.318435	0.334597	0.569084
AT3G08000.1	1.994	0.284168	0.436003	0.728334	2.272	0.278108	0.469806	0.761477
AT2G18890.1	1.82	0.299086	0.393178	0.667549	2.144	0.284536	0.435007	0.724342
AT1G50430.1	1.573	0.348556	0.372151	0.579314	1.735	0.33492	0.419683	0.645968
AT1G50430.2	1.62	0.345813	0.374954	0.586954	1.765	0.328454	0.41299	0.646501
AT5G07740.1	1.916	0.260955	0.370999	0.697889	1.982	0.227191	0.331518	0.70811
AT1G12900.2	1.696	0.400236	0.366842	0.506508	1.963	0.441857	0.442767	0.552158
AT1G12900.3	1.697	0.419346	0.355966	0.474338	1.961	0.460223	0.434396	0.524794
[truncated: 14,578 more rows]

## Sheet: D4
D4 Shoot Control vs. Shoot Salt Intra-Tissue Contrast Derived Statistics, 3’UTR
[truncated: 15,269 more rows]

[truncated: 20 more sheets: D5, D6, D7, D8, D9, D10, D11, D12, D13, D14, D15, D16, D17, D18, D19, D20, D21, D22, D23, D24]
