# Supplementary material
Source: HighWire-hosted journal article supplement (doi:10.1101/rna.072850.119)
Supplement: Supplemental_Data_2.xlsx [file Supplemental_Data_2.xlsx]

## Sheet: R0
R0 Index of Raw Structurome Tables
Table	Contents
R0	Index of Raw Structurome Tables
R1	Shoot Control Whole Transcript Derived Reactivity Statistics
R2	Shoot Salt Whole Transcript Derived Reactivity Statistics
R3	Root Control Whole Transcript Derived Reactivity Statistics
R4	Root Salt Whole Transcript Derived Reactivity Statistics
R5	Shoot Control 5’UTR Derived Reactivity Statistics
R6	Shoot Salt 5’UTR Derived Reactivity Statistics
R7	Root Control 5’UTR Derived Reactivity Statistics
R8	Root Salt 5’UTR Derived Reactivity Statistics
R9	Shoot Control CDS Derived Reactivity Statistics
R10	Shoot Salt CDS Derived Reactivity Statistics
R11	Root Control CDS Derived Reactivity Statistics
R12	Root Salt CDS Derived Reactivity Statistics
R13	Shoot Control 3’UTR Derived Reactivity Statistics
R14	Shoot Salt 3’UTR Derived Reactivity Statistics
R15	Root Control 3’UTR Derived Reactivity Statistics
R16	Root Salt 3’UTR Derived Reactivity Statistics
R17	Shoot Control Downscaled, All

## Sheet: R1
R1 Shoot Control Whole Transcript Derived Reactivity Statistics
transcript	Shoot_Control_Max	Shoot_Control_Average	Shoot_Control_SD	Shoot_Control_Gini
AT3G44680.1	1.812	0.205368	0.374837	0.785046
AT2G14880.1	1.503	0.306582	0.362374	0.625124
AT3G19760.1	1.569	0.319189	0.354007	0.594711
AT1G62780.1	1.591	0.331869	0.35786	0.581232
AT2G12280.1	1.563	0.180641	0.358073	0.816446
AT1G68050.1	1.758	0.294148	0.365893	0.639968
AT2G22190.1	1.456	0.241191	0.37126	0.731592
AT5G62000.3	1.778	0.337303	0.356859	0.572857
AT1G08650.2	1.686	0.240697	0.372863	0.733879
AT3G11130.1	2.035	0.295027	0.368841	0.643905
AT3G09860.1	1.682	0.357205	0.366357	0.557163
AT1G04440.1	1.847	0.260509	0.372312	0.701859
AT5G13090.1	2.642	0.203155	0.38197	0.793995
AT4G30810.1	1.811	0.279927	0.378634	0.676997
AT4G32560.1	1.587	0.288002	0.372679	0.663314
AT3G10680.1	1.597	0.298554	0.368773	0.641454
AT3G60530.1	1.728	0.260287	0.363472	0.692783
AT2G41600.4	1.344	0.241613	0.368367	0.726739
AT1G31730.1	1.751	0.272055	0.365643	0.674814
AT2G41600.2	1.357	0.234056	0.368547	0.738676
AT2G41600.3	1.429	0.26428	0.374264	0.699346
AT5G19540.1	1.537	0.307248	0.366386	0.627136
AT1G11750.1	1.762	0.298213	0.354792	0.622093
AT3G11500.1	1.542	0.304862	0.362793	0.625822
AT5G52780.1	1.466	0.321073	0.359699	0.599131
AT5G50020.2	1.996	0.276487	0.368974	0.674255
AT1G72370.2	1.66	0.396855	0.348748	0.491541
AT1G72370.1	1.644	0.408859	0.34033	0.467402
AT1G18490.1	1.763	0.193388	0.369954	0.805008
AT5G19550.1	1.443	0.265618	0.360069	0.681272
AT3G59060.3	2.077	0.249604	0.379231	0.724013
AT4G23740.1	1.777	0.234366	0.367366	0.735981
AT1G67750.1	2.156	0.212768	0.381745	0.780027
AT3G23900.1	1.99	0.270478	0.367554	0.678064
AT1G73940.1	1.331	0.295113	0.373445	0.655419
AT5G47540.1	1.883	0.263053	0.374881	0.696872
AT2G02370.2	2.662	0.178537	0.401899	0.846244
AT2G02370.1	2.659	0.176884	0.397378	0.845508
AT1G55530.1	1.897	0.238073	0.374754	0.738853
AT2G43210.1	2.064	0.264954	0.378889	0.697376
AT1G52720.1	1.753	0.258406	0.376122	0.708229
AT3G09720.1	1.895	0.228474	0.382137	0.755275
AT1G56000.1	1.961	0.26398	0.377129	0.698519
AT5G22070.1	1.861	0.235512	0.3797	0.746947
AT1G17080.1	1.369	0.313331	0.362984	0.614847
AT1G74670.1	1.446	0.255382	0.354646	0.689981
AT4G23760.1	1.948	0.249136	0.406463	0.74693
AT3G59940.1	1.491	0.34884	0.362143	0.565899
AT5G61412.1	1.407	0.25354	0.350809	0.681685
AT1G24490.2	1.881	0.280843	0.375292	0.673014
AT5G08120.1	1.616	0.275182	0.364201	0.669601
AT3G49670.1	1.887	0.254546	0.37974	0.714751
AT3G51470.1	1.881	0.258629	0.382059	0.708889
AT4G24760.1	1.713	0.251384	0.375782	0.716985
AT1G22360.1	1.752	0.31483	0.361109	0.609353
AT1G22360.2	1.773	0.295205	0.359612	0.635218
AT4G37190.1	1.966	0.250568	0.381969	0.722937
AT5G22050.2	2.101	0.258306	0.376126	0.706857
AT5G22050.1	2.129	0.241322	0.376553	0.733742
AT4G37190.2	1.956	0.249664	0.379617	0.721473
AT3G54130.1	1.9	0.226788	0.377182	0.7554
AT5G49460.1	1.942	0.244839	0.382062	0.732434
AT3G47965.1	1.794	0.237912	0.381774	0.74415
AT3G13120.1	1.464	0.370208	0.348254	0.519841
AT2G26190.1	1.869	0.323256	0.36506	0.599018
AT4G32330.3	1.502	0.337043	0.359042	0.578592
AT1G74920.2	1.69	0.309647	0.354056	0.603695
AT4G32330.1	1.555	0.320838	0.359611	0.600485
AT4G24275.1	2.106	0.279881	0.382061	0.678049
AT1G75800.1	1.747	0.323659	0.357465	0.590964
AT1G71760.1	1.618	0.258809	0.386674	0.717788
AT4G14230.1	1.771	0.301842	0.366036	0.630065
AT3G26115.1	2.197	0.219232	0.378134	0.76331
AT2G03680.1	1.65	0.337159	0.372487	0.59158
AT1G44780.1	1.863	0.309728	0.369191	0.625401
AT2G20020.1	1.626	0.302281	0.356996	0.62228
AT3G01180.1	1.687	0.275204	0.375982	0.682618
AT5G15700.2	1.709	0.239733	0.377107	0.737423
AT1G33060.2	2.031	0.203785	0.372168	0.790061
AT2G18050.1	1.57	0.283374	0.360118	0.65429
AT2G22540.2	1.774	0.262534	0.364506	0.68854
AT2G18050.2	1.538	0.277142	0.358549	0.662673
AT1G75750.1	1.372	0.306488	0.347825	0.604674
AT1G75750.2	1.396	0.288209	0.354037	0.641171
AT3G22150.1	2.072	0.265593	0.38104	0.699312
AT4G17530.1	1.435	0.286185	0.357373	0.6457
AT2G01590.1	1.982	0.277441	0.38917	0.683477
AT1G79245.1	1.879	0.293898	0.363845	0.643582
AT1G66660.2	2.348	0.253545	0.388856	0.720169
AT1G14740.1	1.886	0.320545	0.371345	0.610558
AT5G42150.1	1.712	0.246823	0.373001	0.724173
AT2G34200.1	2.039	0.303692	0.377268	0.63959
AT2G33120.2	1.799	0.268578	0.372602	0.68966
AT2G33120.3	1.66	0.247562	0.367958	0.718227
AT2G33120.1	1.778	0.273931	0.369188	0.677881
AT3G53270.3	1.705	0.209577	0.367009	0.777413
AT1G54210.1	1.721	0.240962	0.386455	0.741869
AT1G54210.2	1.68	0.211244	0.378576	0.784258
AT5G41970.1	1.665	0.280997	0.365463	0.66346
AT4G22240.1	1.57	0.285581	0.363778	0.655388
AT4G17560.1	1.767	0.351505	0.365369	0.566106
AT1G18150.2	1.626	0.235013	0.362204	0.729366
AT5G59000.1	1.767	0.202477	0.363256	0.78466
AT3G22970.2	1.921	0.232183	0.371984	0.740983
AT5G58510.1	2.822	0.23146	0.387471	0.753768
AT1G06850.2	1.828	0.198037	0.373216	0.796484
AT2G03550.1	2.04	0.287941	0.377829	0.667065
AT5G01650.1	1.361	0.317018	0.357569	0.604043
AT5G66250.3	1.599	0.268769	0.374995	0.688551
AT5G65960.1	1.757	0.312627	0.373422	0.628587
AT2G35840.3	1.763	0.228109	0.365377	0.744157
AT2G35840.2	1.631	0.283477	0.366444	0.660153
AT2G35840.1	1.611	0.289143	0.364781	0.649855
AT2G33810.1	1.855	0.248235	0.377277	0.723399
AT5G36290.1	1.718	0.245024	0.369662	0.721861
AT5G36290.2	1.671	0.24841	0.366443	0.714171
AT4G30260.1	1.712	0.264265	0.372822	0.696027
AT4G16180.2	1.912	0.27219	0.373451	0.684658
AT4G16180.1	1.51	0.200261	0.36585	0.79132
AT4G38740.1	1.375	0.369524	0.356133	0.53425
AT3G20410.1	1.609	0.299423	0.362359	0.63295
AT2G36000.1	1.844	0.308733	0.361999	0.613458
AT5G37510.1	1.768	0.295831	0.359944	0.635273
AT5G37510.2	1.756	0.290526	0.359405	0.64258
AT1G51110.1	1.988	0.314878	0.371629	0.617371
AT5G65940.2	1.871	0.308582	0.371362	0.630054
AT5G65940.3	1.818	0.300892	0.369546	0.640544
AT1G17680.1	1.941	0.24789	0.375168	0.72132
AT5G59410.1	1.612	0.222086	0.360362	0.746637
AT3G20780.1	2.131	0.252864	0.380261	0.715589
AT1G21160.1	1.892	0.267903	0.364603	0.679924
AT5G55960.1	1.775	0.265383	0.378813	0.698836
AT5G22875.1	1.508	0.240478	0.373845	0.733933
AT1G05150.1	1.702	0.256896	0.370247	0.705396
AT3G46020.1	1.722	0.197936	0.369286	0.793038
AT5G04440.1	1.878	0.291439	0.364949	0.641981
AT3G47060.1	1.909	0.276924	0.37988	0.681657
AT1G65440.1	1.791	0.331607	0.358587	0.580784
AT3G63500.1	1.976	0.308076	0.367508	0.625623
AT5G04420.2	1.94	0.249598	0.3737	0.717649
AT5G04420.3	2.006	0.231815	0.373256	0.745026
AT5G04420.1	1.963	0.242784	0.371737	0.725788
AT3G63500.2	1.954	0.314559	0.369179	0.617479
AT3G46000.1	1.827	0.303167	0.376613	0.639619
AT2G40660.1	1.775	0.314983	0.366999	0.615087
AT1G19310.1	1.91	0.249114	0.385517	0.73018
AT4G31990.3	1.65	0.309739	0.363175	0.617919
AT2G38980.1	3.079	0.156668	0.417719	0.884013
AT4G31990.1	1.596	0.309123	0.357313	0.611519
AT5G28770.3	1.893	0.265948	0.372815	0.692174
AT4G32400.1	1.986	0.285692	0.378582	0.666205
AT3G13460.1	1.726	0.333322	0.358142	0.57849
AT3G17120.1	1.885	0.219298	0.375104	0.765496
AT4G01040.1	1.544	0.266519	0.364473	0.683828
AT4G24830.1	1.7	0.270421	0.362447	0.674749
AT3G13460.2	1.739	0.328623	0.359175	0.58606
AT5G42390.1	1.659	0.312601	0.360554	0.612319
AT1G60260.1	1.616	0.259484	0.369574	0.698483
AT1G59840.2	1.858	0.234186	0.370629	0.73732
AT4G04470.1	1.648	0.239076	0.361593	0.72421
AT3G07790.1	1.554	0.295969	0.357801	0.630665
AT1G59840.1	1.678	0.250889	0.366144	0.70817
AT5G43050.1	1.671	0.248166	0.381396	0.724697
AT5G46680.1	1.696	0.194593	0.369886	0.800469
AT1G17455.2	2.193	0.201902	0.373948	0.793872
AT1G17455.1	2.034	0.224125	0.375671	0.760376
AT3G18960.1	1.832	0.256201	0.374256	0.70754
AT3G48200.1	1.779	0.259999	0.371503	0.700125
AT1G11260.1	1.637	0.355042	0.349254	0.540568
AT1G64750.2	2.071	0.312283	0.368146	0.616105
AT1G64750.3	2.119	0.231204	0.382227	0.755323
AT3G25530.1	1.443	0.338615	0.363482	0.582992
AT1G64750.1	1.987	0.334694	0.376588	0.595784
AT3G01480.1	1.585	0.357	0.360925	0.554972
AT2G42190.1	1.341	0.344604	0.361712	0.57287
AT3G01480.2	1.627	0.332394	0.364918	0.590865
AT3G09440.1	1.651	0.304085	0.36702	0.63176
AT5G49660.1	1.93	0.226739	0.380278	0.757249
AT3G09440.2	1.641	0.309985	0.366463	0.622701
AT5G16680.1	1.716	0.274041	0.370693	0.678677
AT2G34300.2	2.285	0.282373	0.375798	0.667845
AT2G34300.1	2.305	0.279618	0.375455	0.671089
AT1G69840.7	1.575	0.302876	0.366559	0.634226
AT3G25150.1	1.523	0.305472	0.363291	0.626182
AT1G21580.1	2.349	0.253282	0.375892	0.714664
AT2G17670.1	2.073	0.186901	0.372531	0.813905
AT4G24900.1	2.226	0.216707	0.391721	0.780486
AT1G48650.1	2.275	0.262177	0.37013	0.692067
AT4G14920.1	2	0.248316	0.379253	0.72544
AT1G48650.2	1.934	0.259848	0.370824	0.697164
AT5G36710.1	1.734	0.209804	0.372093	0.779786
AT2G22450.1	1.566	0.308449	0.360786	0.617735
AT5G49510.2	1.587	0.237843	0.370088	0.734044
AT5G51750.1	1.945	0.27798	0.367013	0.669475
AT5G58100.1	1.89	0.262414	0.374951	0.699058
AT2G18960.1	1.48	0.336036	0.35551	0.575159
AT1G16260.2	1.968	0.26699	0.373256	0.690419
AT5G02500.1	2.006	0.338712	0.35494	0.564419
AT1G56460.2	1.869	0.292392	0.371314	0.654076
AT1G01770.1	1.82	0.243441	0.383946	0.73598
AT5G25100.1	1.673	0.274364	0.370059	0.678676
AT5G25100.2	1.701	0.260816	0.370842	0.700427
AT2G46320.3	2.297	0.209425	0.36984	0.777002
AT3G19360.1	1.809	0.221517	0.380894	0.768415
AT2G36060.1	1.727	0.249673	0.375957	0.723401
AT2G36060.2	1.744	0.248511	0.374315	0.723255
AT2G36060.3	1.819	0.242559	0.37572	0.732694
AT1G72170.1	1.653	0.278038	0.380949	0.683886
AT3G24530.1	1.602	0.259906	0.365592	0.693156
AT1G07930.1	2.042	0.370103	0.364226	0.537201
AT1G47250.1	1.769	0.303996	0.370822	0.635052
AT1G07930.2	2.09	0.358533	0.37386	0.561836
AT4G09030.1	1.398	0.269034	0.358395	0.673304
AT5G57200.1	7	0.182863	1.0998	0.973788
AT3G51370.2	1.794	0.268549	0.362464	0.677367
AT3G51370.1	1.799	0.27933	0.361413	0.659263
AT4G08850.2	1.902	0.276631	0.371271	0.673737
AT4G08850.1	1.852	0.289336	0.36665	0.649689
AT4G32010.1	2.072	0.228316	0.376912	0.752062
AT1G21630.2	1.849	0.263417	0.369953	0.69343
AT1G73030.1	1.394	0.319174	0.346833	0.585536
AT1G21630.1	1.819	0.272256	0.369198	0.679576
AT4G19060.1	1.794	0.265657	0.367799	0.687201
AT3G25840.2	1.803	0.323229	0.361012	0.594521
AT3G25840.1	1.79	0.330971	0.361531	0.585708
AT1G27030.1	1.569	0.27645	0.368165	0.672957
AT2G20950.3	1.926	0.274704	0.373933	0.679787
AT2G20950.2	1.905	0.267507	0.372955	0.690062
AT2G20950.1	1.833	0.276226	0.369631	0.673818
AT3G06450.2	2.397	0.24244	0.376127	0.727028
AT3G25150.2	1.555	0.277248	0.36667	0.671589
AT3G02950.1	1.59	0.312572	0.363612	0.616793
AT2G21060.1	1.527	0.398098	0.353591	0.496805
AT5G46920.1	2.235	0.201999	0.390922	0.804059
AT4G15760.1	1.789	0.256253	0.385247	0.722443
AT3G07730.1	1.81	0.240581	0.381313	0.737571
AT1G33700.2	2.827	0.167152	0.401488	0.86154
AT3G55500.1	1.8	0.285992	0.382475	0.671883
AT1G76160.1	1.678	0.328104	0.356139	0.583039
AT4G19520.1	2.351	0.205439	0.376796	0.788662
AT4G11360.1	1.751	0.238721	0.378237	0.740411
AT4G21190.1	1.857	0.315994	0.374644	0.624921
AT5G62900.1	1.689	0.27312	0.369514	0.681428
AT1G58030.1	1.806	0.271433	0.37313	0.682285
AT4G19990.1	2.189	0.225543	0.380213	0.758398
AT5G11990.1	1.535	0.24502	0.366583	0.717899
AT4G19990.2	2.135	0.227823	0.374893	0.750445
AT3G27100.1	1.817	0.260972	0.37612	0.700615
AT3G27100.2	1.918	0.225773	0.379198	0.758873
AT1G51450.1	1.931	0.251295	0.383664	0.723358
AT1G29470.1	1.615	0.351744	0.352089	0.547628
AT5G03420.1	1.637	0.268064	0.36537	0.683331
AT1G19880.1	1.915	0.295472	0.36593	0.638497
AT1G64500.1	1.693	0.276198	0.367347	0.671595
AT2G01060.1	1.689	0.300005	0.362803	0.630605
AT4G29870.1	1.854	0.249734	0.383254	0.72364
AT5G67570.1	1.674	0.296139	0.367662	0.641852
AT4G08110.1	1.902	0.195375	0.369339	0.800426
AT5G01390.4	1.979	0.228523	0.379579	0.754672
AT5G01390.3	2.011	0.215228	0.380618	0.777282
AT5G59180.1	1.526	0.22804	0.366306	0.746037
AT1G58684.1	1.618	0.386796	0.362951	0.521983
AT5G03905.1	1.795	0.245436	0.368225	0.712244
AT5G15610.2	1.903	0.27287	0.369919	0.677666
AT5G15610.1	2.002	0.262664	0.373651	0.695329
AT1G80950.1	1.589	0.271907	0.373587	0.687968
AT5G35100.2	2.12	0.278705	0.379936	0.676299
AT4G33565.1	2.228	0.229201	0.38831	0.760625
AT2G22970.1	1.891	0.225857	0.375676	0.756358
AT5G50110.1	1.557	0.238463	0.363377	0.725912
AT1G65320.1	1.817	0.232905	0.376918	0.745688
AT5G05410.1	1.583	0.299232	0.373637	0.648545
AT1G13170.2	1.987	0.236146	0.381038	0.744329
AT3G51430.1	2.064	0.249264	0.375476	0.720559
AT1G14010.1	1.529	0.313262	0.363854	0.615139
AT5G42780.1	1.673	0.26306	0.368158	0.693837
AT1G28580.2	1.703	0.238002	0.376746	0.741492
AT1G28580.1	1.587	0.268928	0.37751	0.696204
AT2G27140.1	1.717	0.247676	0.374479	0.720727
AT5G16110.1	1.888	0.24708	0.371467	0.718769
AT5G55990.1	2.018	0.30918	0.387357	0.644366
AT3G52220.1	1.962	0.341193	0.366647	0.57686
AT5G45100.2	2.148	0.244287	0.382362	0.736267
AT4G13200.1	1.682	0.301432	0.36616	0.633054
AT3G56120.1	1.808	0.244512	0.380346	0.732394
AT5G44020.1	1.709	0.359441	0.361322	0.550547
AT3G10350.2	1.667	0.264706	0.368144	0.691591
AT1G06360.1	1.493	0.318451	0.372724	0.619733
AT3G53560.1	1.785	0.29752	0.363722	0.63626
AT1G21650.1	1.967	0.267535	0.381573	0.697771
AT1G21650.2	1.963	0.272334	0.382112	0.690883
AT1G21650.3	2.077	0.241396	0.376325	0.731721
AT1G52980.1	1.848	0.327169	0.365769	0.596477
AT1G30330.1	2.106	0.253307	0.377384	0.715071
AT5G44000.1	1.696	0.24805	0.369371	0.717279
AT1G30330.2	2.106	0.252103	0.377039	0.716425
AT3G10330.1	1.654	0.257068	0.367954	0.700984
AT4G08500.1	1.811	0.255756	0.369711	0.703337
AT4G03260.2	1.817	0.259648	0.370712	0.700859
AT5G67320.1	1.614	0.337222	0.358295	0.576551
AT4G31180.1	2.033	0.295322	0.375883	0.651551
AT4G31180.2	2.038	0.289399	0.376872	0.661461
AT4G03200.2	1.993	0.254033	0.36855	0.708447
AT4G03200.1	1.916	0.280035	0.370025	0.670776
AT1G08880.1	1.601	0.315379	0.363049	0.606972
AT1G09580.1	1.622	0.230323	0.371138	0.746237
AT5G44240.2	1.828	0.227147	0.379999	0.757594
AT3G57660.1	2.207	0.214272	0.381255	0.778093
ATCG00250.1	1.411	0.236048	0.3755	0.738407
AT1G74260.1	1.749	0.290614	0.366813	0.648803
AT3G22590.1	1.841	0.313763	0.373019	0.625438
AT1G52500.1	2.223	0.243028	0.382215	0.732369
AT3G25717.1	1.292	0.303663	0.363818	0.632982
AT1G76270.1	2.532	0.213639	0.385764	0.782093
AT2G46030.1	1.397	0.240703	0.359681	0.718739
AT3G57080.1	1.588	0.247532	0.368443	0.717504
AT2G47110.1	1.423	0.355108	0.338739	0.524724
AT2G47110.2	1.466	0.352248	0.339532	0.529142
AT3G25190.1	2.219	0.231718	0.387749	0.753584
AT5G27150.1	1.859	0.243063	0.368296	0.723797
AT2G45010.1	1.637	0.285522	0.382172	0.673164
AT1G01790.1	1.827	0.289367	0.367919	0.652808
AT5G57120.1	1.716	0.348264	0.357744	0.561193
AT5G20520.1	1.659	0.262073	0.365988	0.690701
AT3G04310.1	1.792	0.248357	0.385173	0.729794
AT1G11910.1	1.73	0.330047	0.358014	0.584708
AT4G12310.1	1.671	0.264225	0.366232	0.688047
AT1G27970.2	1.934	0.222445	0.36051	0.748441
AT5G09230.5	1.876	0.235154	0.385867	0.749832
AT4G30020.1	2.298	0.254543	0.375993	0.711911
AT5G20500.1	1.572	0.335064	0.358878	0.578514
AT2G01190.1	1.968	0.298135	0.36797	0.642242
AT1G01780.1	1.507	0.231502	0.373434	0.748648
AT5G62050.1	1.709	0.257058	0.369293	0.701375
AT3G60130.1	1.801	0.29128	0.370389	0.653027
AT2G40750.1	1.549	0.285824	0.364818	0.656429
AT3G60130.3	1.865	0.273801	0.37068	0.677556
AT1G09830.1	1.614	0.247456	0.359308	0.706751
AT3G12120.2	1.768	0.322836	0.3619	0.59574
AT3G12550.1	2.01	0.226733	0.370133	0.752056
AT3G19640.1	1.584	0.271216	0.367224	0.67762
AT3G56130.2	1.492	0.26065	0.364533	0.694634
AT3G06480.1	2.267	0.253819	0.381655	0.716298
AT1G32460.1	1.662	0.281484	0.374976	0.67502
AT2G23070.1	1.462	0.268011	0.36369	0.682291
AT5G27290.2	1.762	0.271595	0.375601	0.68758
AT5G02800.1	1.815	0.223072	0.370723	0.754745
AT2G16930.1	1.453	0.264933	0.363064	0.685627
AT2G16930.2	1.445	0.298175	0.362472	0.633925
AT2G16930.3	1.446	0.262806	0.363632	0.689579
AT3G14330.1	2.036	0.23052	0.372678	0.744473
AT4G16141.1	1.786	0.347692	0.372067	0.576395
AT5G19930.2	1.739	0.184163	0.36589	0.815197
AT5G42770.1	1.549	0.271656	0.361992	0.671205
AT5G42770.2	1.619	0.243803	0.358538	0.70827
AT5G19930.1	1.753	0.177453	0.363476	0.82369
AT2G16950.2	2.051	0.239244	0.380953	0.740175
AT2G16950.1	2.109	0.235079	0.384317	0.749299
AT5G10060.1	2.292	0.259143	0.38005	0.706964
AT3G29160.1	1.8	0.254128	0.381207	0.716794
AT3G29160.2	1.755	0.259361	0.379227	0.707119
AT3G29160.3	1.751	0.259016	0.377789	0.705325
AT1G51270.3	1.847	0.227884	0.375147	0.752504
AT1G69935.1	1.584	0.253829	0.368549	0.706967
AT5G61770.3	2.432	0.26256	0.389649	0.707699
AT5G61770.2	2.298	0.265718	0.383726	0.697426
AT5G61770.1	2.322	0.262354	0.394617	0.712251
AT2G34925.1	1.592	0.213303	0.36255	0.759863
AT2G48121.1	1.385	0.227327	0.362337	0.746351
AT1G11680.1	1.648	0.280089	0.378689	0.678868
AT3G01610.1	2.379	0.242599	0.390868	0.740335
AT2G48121.2	1.392	0.272672	0.3643	0.677058
AT3G62650.1	1.614	0.320632	0.377313	0.623903
AT5G64380.1	1.699	0.26399	0.369596	0.69203
AT1G51270.4	1.769	0.218056	0.371146	0.765131
AT3G45900.1	1.501	0.239458	0.36864	0.732164
AT2G33630.1	1.939	0.267496	0.373694	0.687826
AT4G11100.2	1.755	0.287513	0.36302	0.648261
AT4G11100.1	1.723	0.316379	0.360584	0.603197
AT5G05730.1	1.839	0.306071	0.363289	0.620108
AT2G37400.1	1.662	0.287648	0.369583	0.655331
AT5G05730.2	1.815	0.290442	0.364873	0.644773
AT1G74920.1	1.698	0.325795	0.35593	0.585162
AT1G29880.1	1.674	0.318923	0.370111	0.614742
AT5G08560.2	1.933	0.260678	0.373184	0.700545
AT1G54610.1	2.018	0.273675	0.362338	0.670506
AT1G54610.2	2.054	0.26242	0.363617	0.68973
AT1G54610.3	2.044	0.267186	0.364565	0.683141
AT5G23630.1	1.842	0.257215	0.38495	0.715725
AT5G55580.1	2.067	0.23975	0.388669	0.743508
AT1G25560.1	1.454	0.305505	0.360838	0.624696
AT1G65840.1	2.487	0.23417	0.381588	0.748718
AT1G19740.1	1.701	0.326906	0.356822	0.582754
AT2G38000.1	1.976	0.304519	0.381222	0.644332
AT1G20816.1	1.518	0.259043	0.369932	0.699311
AT5G43760.1	2.066	0.346666	0.366119	0.570557
AT4G28740.1	1.916	0.268489	0.373083	0.690662
AT5G23405.2	1.564	0.281225	0.378778	0.678189
AT3G16140.1	1.41	0.414784	0.343765	0.469152
AT1G51610.1	2.199	0.252785	0.369019	0.707375
AT1G08370.1	1.749	0.247824	0.375141	0.723473
AT2G22490.1	1.875	0.238261	0.371265	0.734037
AT2G22490.2	1.898	0.236667	0.372567	0.737588
AT1G24020.1	1.977	0.28515	0.386523	0.677364
AT3G16720.1	2.164	0.219783	0.373474	0.763045
AT1G73710.1	2.785	0.21029	0.389282	0.787927
AT5G47435.1	2.008	0.267894	0.382404	0.698531
AT1G07135.1	1.291	0.419093	0.36277	0.490372
AT4G32070.1	1.546	0.303565	0.35826	0.621052
AT1G66100.1	1.406	0.30025	0.352733	0.620919
AT5G60640.1	2.093	0.300606	0.354081	0.617062
AT5G60640.2	2.162	0.289542	0.357153	0.637392
AT5G60640.3	2.117	0.292048	0.357833	0.634426
AT1G25211.1	1.673	0.29742	0.365897	0.637338
AT3G52420.1	1.528	0.284969	0.360759	0.647999
AT3G53500.2	1.895	0.307694	0.365989	0.622775
AT3G53500.1	1.991	0.298507	0.371271	0.641755
AT5G60620.1	1.663	0.289195	0.370841	0.655824
AT2G47850.1	1.689	0.235379	0.378789	0.742235
AT1G45249.1	1.725	0.290404	0.361086	0.644309
AT1G45249.2	1.547	0.270798	0.361634	0.675721
AT1G45249.3	1.569	0.275201	0.361423	0.66783
AT2G01100.1	1.751	0.34909	0.363308	0.566036
AT2G01100.3	1.822	0.318654	0.36718	0.609835
AT2G01100.2	1.695	0.364136	0.360424	0.543419
AT5G27860.1	1.49	0.281707	0.369087	0.667625
AT3G19050.1	2.731	0.222548	0.389978	0.771008
AT4G23885.1	1.722	0.237522	0.366895	0.730636
AT5G27860.2	1.503	0.264933	0.36903	0.694291
AT1G54310.1	1.761	0.280198	0.374696	0.67455
AT1G54770.1	1.405	0.270747	0.362969	0.676896
AT3G21610.2	2.796	0.193082	0.384705	0.810681
AT3G14350.2	1.77	0.247363	0.371691	0.720618
AT3G14350.1	1.708	0.265103	0.37	0.691429
AT3G21610.1	2.755	0.200046	0.383671	0.798621
AT1G33600.1	2.163	0.29249	0.380398	0.661557
AT1G32160.1	1.677	0.278387	0.370859	0.672101
AT3G27750.1	1.696	0.278255	0.380032	0.679441
AT5G39740.2	1.775	0.372841	0.36365	0.539173
AT5G54860.1	1.965	0.222791	0.378244	0.762644
AT2G21260.1	2.24	0.167799	0.389947	0.855921
AT3G07430.1	1.628	0.315402	0.356709	0.604609
AT4G24510.1	1.824	0.291241	0.368224	0.651155
AT1G70090.1	1.658	0.290225	0.372883	0.659658
AT1G70090.2	1.687	0.253142	0.367538	0.709432
AT5G04360.1	1.902	0.238736	0.375785	0.736348
AT1G64572.1	1.698	0.297627	0.384186	0.660233
AT1G70430.1	2.842	0.168271	0.410908	0.863995
AT4G27040.1	1.535	0.271526	0.365883	0.675663
AT5G66520.1	1.844	0.247246	0.372043	0.716374
AT3G21810.1	1.787	0.297739	0.366125	0.639678
AT1G17650.1	1.73	0.289586	0.369585	0.656129
AT1G76405.2	1.511	0.278086	0.371697	0.676528
AT4G32605.1	2.199	0.291049	0.396181	0.67548
AT2G41500.1	2.658	0.25709	0.386818	0.714437
AT5G51640.1	2.55	0.21915	0.39438	0.77599
AT3G21430.2	2.489	0.239491	0.391688	0.746166
AT3G48820.1	1.843	0.251387	0.376398	0.720139
AT3G48820.2	1.839	0.256682	0.378621	0.714343
AT1G71850.1	1.459	0.255971	0.363135	0.69824
AT2G26900.1	1.819	0.335814	0.365969	0.585181
AT2G46535.1	1.619	0.240003	0.362882	0.719902
AT4G26670.1	2.302	0.251853	0.374213	0.709761
AT1G36050.2	1.861	0.296761	0.366386	0.640995
AT3G58500.1	1.634	0.311685	0.352092	0.599501
AT5G54720.1	1.627	0.258545	0.371171	0.705954
AT2G38260.1	2.82	0.140877	0.399672	0.898334
AT3G02870.1	1.953	0.241125	0.366121	0.724424
AT3G02870.3	1.955	0.227021	0.363212	0.744516
AT3G02870.2	1.531	0.219834	0.365522	0.759349
AT5G47110.1	1.75	0.338463	0.360466	0.576486
AT1G18250.1	1.862	0.260953	0.391754	0.716251
AT1G18250.2	1.95	0.243326	0.391135	0.740951
AT3G63440.1	1.759	0.221603	0.366726	0.757587
AT3G66652.2	2.156	0.230079	0.388143	0.757437
AT2G03710.2	1.679	0.280114	0.374788	0.669944
AT2G03710.3	1.743	0.259814	0.376564	0.70434
AT4G21540.3	1.979	0.313287	0.368166	0.619222
AT5G20000.1	1.704	0.275642	0.369896	0.675642
AT5G54310.1	2.136	0.323525	0.37178	0.610295
AT1G78830.1	1.759	0.381227	0.359571	0.524217
AT4G18060.1	2.025	0.278713	0.386672	0.686231
AT2G30150.1	1.522	0.279181	0.363981	0.665755
AT5G20140.2	1.829	0.266257	0.366131	0.688319
AT5G40970.1	1.495	0.154438	0.34804	0.851659
AT5G59250.1	1.433	0.28254	0.375982	0.673117
AT2G46370.4	1.95	0.219705	0.371796	0.764137
AT4G29480.1	1.839	0.31907	0.360573	0.601537
AT5G37830.1	1.817	0.293986	0.373189	0.652895
AT3G49601.1	1.828	0.401937	0.356332	0.494074
AT1G28340.1	2.094	0.253787	0.382459	0.71749
AT5G44800.1	1.995	0.23968	0.369762	0.728658
AT2G01021.1	1.562	0.167	0.36515	0.829026
AT3G06190.1	1.571	0.295525	0.367782	0.645425
AT4G00730.2	1.823	0.253526	0.369182	0.708224
AT4G00730.1	1.789	0.261964	0.367661	0.693579
AT4G38260.1	1.852	0.243499	0.370137	0.726693
AT2G29580.1	1.715	0.257243	0.393453	0.725665
AT3G16810.1	1.643	0.258975	0.368341	0.69918
AT2G46220.1	1.511	0.347971	0.356949	0.559712
AT2G18700.1	1.906	0.3025	0.373789	0.642198
AT5G14120.1	1.606	0.312601	0.356807	0.606349
AT5G24630.5	1.835	0.230218	0.371894	0.745693
AT5G24630.4	1.819	0.23644	0.370236	0.733542
AT5G04480.2	1.834	0.254491	0.372274	0.709242
AT5G24630.6	1.853	0.23004	0.37256	0.745843
AT5G24630.1	1.834	0.233352	0.371093	0.739031
AT5G24630.3	1.82	0.2362	0.36924	0.732491
AT5G52470.1	1.69	0.370087	0.356853	0.534923
AT4G15560.1	1.644	0.344047	0.36421	0.576254
AT4G00750.1	1.653	0.31075	0.366159	0.619561
AT3G22121.1	1.71	0.208115	0.379057	0.790068
AT3G52155.1	1.859	0.271216	0.367235	0.677819
AT4G39350.1	2.226	0.28257	0.365198	0.657991
AT1G24510.1	1.435	0.343919	0.353952	0.562004
AT3G52390.1	1.542	0.256583	0.374317	0.707674
AT1G76360.1	1.754	0.279717	0.371676	0.670999
AT1G09160.2	2.135	0.238871	0.372206	0.73278
AT3G52390.2	1.547	0.250085	0.373581	0.716924
AT4G31310.1	1.439	0.275176	0.353688	0.655779
AT3G58040.1	1.796	0.262077	0.370459	0.695037
AT4G35750.1	1.666	0.318672	0.375387	0.620877
AT3G59890.2	1.789	0.223609	0.377314	0.761257
AT3G59890.1	1.779	0.232581	0.380229	0.750223
AT2G45910.1	2.028	0.258988	0.383535	0.713278
AT1G20110.1	1.813	0.268193	0.374184	0.691043
AT3G51040.1	1.931	0.259037	0.379034	0.705798
AT3G53900.2	1.813	0.279582	0.369914	0.668867
AT3G53900.1	1.443	0.259216	0.366229	0.697158
AT5G54300.1	1.944	0.23445	0.372306	0.741996
AT1G09590.1	1.601	0.343176	0.354539	0.563383
AT2G39000.1	2.028	0.260046	0.369653	0.697284
AT1G18030.2	1.819	0.231302	0.374787	0.744084
AT4G30950.1	1.735	0.352373	0.356422	0.554204
AT3G22142.1	2.134	0.296385	0.362262	0.629858
AT5G22770.2	2.011	0.282926	0.373381	0.666917
AT4G38040.1	1.832	0.231537	0.369975	0.742584
AT2G26500.2	1.451	0.345928	0.349939	0.552251
AT2G26500.3	1.525	0.33602	0.349906	0.566634
AT3G04880.1	1.615	0.295603	0.362279	0.634841
AT4G35080.1	1.667	0.232852	0.370821	0.739431
AT4G35080.3	1.751	0.219491	0.375313	0.765304
AT1G80460.2	1.878	0.281064	0.362404	0.656022
AT1G20770.1	1.534	0.282355	0.369488	0.667801
AT5G61020.1	1.733	0.347344	0.360881	0.565808
AT2G36145.1	1.407	0.371311	0.349613	0.524312
AT5G17070.1	1.683	0.312404	0.360683	0.60942
AT5G22770.1	1.964	0.300481	0.371319	0.639865
AT5G04870.1	1.662	0.291371	0.359535	0.638548
AT5G46430.2	1.236	0.33704	0.353493	0.573103
AT5G46430.1	1.238	0.339826	0.35215	0.567464
AT1G67470.1	1.876	0.240097	0.388887	0.746294
AT1G56240.1	1.803	0.203043	0.379433	0.79685
AT3G48420.1	1.566	0.33383	0.35636	0.577459
AT2G22170.1	1.522	0.296969	0.363021	0.638521
AT4G19120.1	1.706	0.310459	0.367853	0.624168
AT4G19120.2	1.692	0.31051	0.367429	0.623393
AT1G04635.1	1.705	0.222063	0.377645	0.761768
AT3G06670.2	1.932	0.254956	0.363045	0.699065
AT3G06670.1	1.897	0.268312	0.362692	0.677152
AT1G43670.1	1.377	0.343294	0.337489	0.537924
AT5G63905.1	1.507	0.262066	0.366531	0.693473
AT4G09650.1	1.724	0.371497	0.356105	0.530805
AT2G31600.1	1.948	0.189571	0.372613	0.808999
AT3G17712.2	2.199	0.205181	0.379896	0.788414
AT2G31600.2	1.9	0.188668	0.371472	0.810722
AT2G30320.1	2.196	0.288185	0.369825	0.652136
AT3G17712.3	2.155	0.213024	0.378003	0.7738
AT5G01530.1	1.987	0.409634	0.352554	0.482992
AT1G20960.1	1.902	0.299011	0.367284	0.636759
AT1G20960.2	1.906	0.297541	0.367669	0.639458
AT1G30460.1	2.294	0.245126	0.381835	0.731133
AT3G50670.1	1.517	0.318851	0.35182	0.592358
AT3G50670.2	1.703	0.273076	0.358672	0.664682
AT4G01330.1	1.808	0.310888	0.367351	0.622023
AT4G01330.2	1.861	0.295836	0.371339	0.649485
AT4G36420.1	1.608	0.333656	0.375183	0.601093
AT5G09220.1	1.699	0.277964	0.366726	0.669924
AT3G05410.2	1.642	0.274524	0.36373	0.6725
AT3G54050.1	1.705	0.379433	0.350813	0.512635
AT1G10060.1	2.217	0.247846	0.37443	0.718706
AT3G05410.1	1.452	0.227065	0.371709	0.752128
AT2G14460.1	1.516	0.270209	0.36505	0.67867
AT3G19990.1	1.735	0.290979	0.36231	0.638936
AT2G33570.1	1.743	0.251244	0.36912	0.71113
AT1G60995.1	1.786	0.246899	0.375539	0.720569
AT3G12685.1	1.841	0.271573	0.370806	0.681867
AT2G27100.1	1.776	0.284762	0.369853	0.661024
AT4G13220.1	1.454	0.257842	0.373915	0.708032
AT4G39330.2	1.99	0.305456	0.385112	0.64646
AT2G29500.1	1.449	0.350045	0.370317	0.575044
AT5G05450.1	1.827	0.275761	0.366239	0.671924
AT3G20860.1	1.935	0.202455	0.37348	0.792773
AT2G20760.1	1.662	0.339958	0.350161	0.560017
AT5G65430.1	1.508	0.296564	0.361381	0.636955
AT5G65430.2	1.505	0.286733	0.358951	0.648243
AT5G65430.3	1.545	0.252114	0.358534	0.701756
AT3G17780.1	1.285	0.335509	0.361728	0.585559
AT5G54440.1	2.012	0.244724	0.377277	0.728097
AT2G28430.1	1.403	0.270333	0.369569	0.684208
AT4G14570.1	1.618	0.236732	0.374101	0.737833
AT3G02860.2	1.676	0.306376	0.362709	0.623511
AT1G48920.1	1.758	0.404806	0.343367	0.474221
AT2G28890.1	1.665	0.254659	0.36743	0.705882
AT1G08580.1	1.691	0.345636	0.366835	0.57484
AT3G08610.1	1.363	0.37003	0.347415	0.519967
AT1G09150.1	1.477	0.290709	0.362849	0.648298
AT3G06700.1	1.507	0.375049	0.352773	0.518378
AT2G01970.1	1.745	0.251756	0.370637	0.711584
AT3G19650.1	1.897	0.334316	0.371021	0.591548
AT5G65000.1	2.19	0.240988	0.389268	0.740072
AT1G07020.1	1.929	0.307953	0.378623	0.639335
AT5G65000.2	2.267	0.225617	0.392642	0.767383
AT4G21150.2	1.736	0.264479	0.377722	0.699548
AT4G21150.3	1.87	0.268448	0.382179	0.697774
AT4G21150.1	1.862	0.270091	0.381568	0.694826
AT3G61080.1	1.542	0.331742	0.361818	0.589064
AT5G65020.2	2.214	0.276545	0.377541	0.681835
AT5G65020.1	2.271	0.283021	0.379073	0.674063
AT1G23290.1	1.261	0.347691	0.341935	0.541275
AT5G47500.1	2.025	0.27081	0.372297	0.685127
AT1G34000.1	1.533	0.267347	0.357885	0.677041
AT3G53410.1	2.181	0.211062	0.386063	0.785108
AT5G23940.1	2.531	0.270476	0.384395	0.692281
AT1G28660.2	1.71	0.231029	0.373748	0.748266
AT3G05900.1	1.715	0.384131	0.350101	0.505801
AT1G55140.1	2.181	0.309547	0.373813	0.627913
AT1G28660.1	1.674	0.235154	0.371199	0.739655
AT3G23660.1	1.787	0.245709	0.3777	0.725968
AT2G26560.1	1.701	0.344746	0.357793	0.563103
AT2G39080.1	1.694	0.304592	0.37233	0.637161
AT3G23660.2	1.854	0.2333	0.380627	0.748215
AT4G39838.1	1.516	0.294452	0.354493	0.630167
AT4G02120.1	1.785	0.286398	0.372299	0.659465
AT4G31420.1	1.461	0.28547	0.36343	0.6546
AT2G38870.1	1.507	0.270215	0.365931	0.679752
AT5G38480.2	1.495	0.321818	0.357671	0.595944
AT5G38480.1	1.474	0.347586	0.354334	0.558193
AT3G02110.1	1.653	0.267415	0.370065	0.688429
AT1G17470.1	1.695	0.313646	0.368433	0.620898
AT5G49470.3	2.265	0.248551	0.373395	0.717471
AT3G14400.1	2.222	0.25376	0.379379	0.713984
AT1G17470.2	1.692	0.306928	0.369265	0.631527
AT1G09130.3	1.724	0.335059	0.361898	0.581897
AT1G09130.2	1.728	0.345311	0.364044	0.57067
AT1G09130.1	1.706	0.350877	0.359766	0.559537
AT1G55150.1	1.554	0.251471	0.370286	0.712892
AT1G07780.4	1.83	0.226479	0.370831	0.753198
AT1G07780.5	1.804	0.251649	0.369791	0.711098
AT1G07780.2	1.742	0.269156	0.366181	0.679413
AT1G07780.3	1.849	0.236994	0.372542	0.737483
AT1G07780.1	1.72	0.271268	0.367407	0.678806
AT1G31220.1	2.457	0.20931	0.38187	0.78318
AT3G10070.1	2.057	0.20828	0.370462	0.777319
AT5G19010.1	1.961	0.274487	0.370086	0.674957
AT4G25630.1	2.105	0.278989	0.389535	0.685797
AT4G22250.1	1.64	0.234595	0.36455	0.73069
AT4G16360.3	1.504	0.226704	0.364301	0.74471
AT4G16360.2	2.465	0.240434	0.381374	0.73523
AT4G16360.1	2.44	0.244294	0.381405	0.729757
AT2G29970.1	1.943	0.252885	0.376185	0.715675
AT5G19030.2	1.801	0.201227	0.362954	0.781972
AT5G16750.1	1.798	0.252412	0.372748	0.711978
AT4G26970.1	1.688	0.28439	0.363319	0.6564
AT3G22320.1	1.479	0.342065	0.363637	0.579324
AT1G68160.1	1.814	0.215502	0.381668	0.774668
AT3G09490.1	2.149	0.233706	0.396025	0.760452
ATCG00920.1	2.255	0.229536	0.376036	0.719816
AT5G66210.4	1.987	0.328408	0.369926	0.600601
AT5G66210.1	1.915	0.32967	0.365644	0.593977
AT4G13430.1	1.619	0.363607	0.349969	0.53137
AT5G66210.3	1.548	0.301957	0.362617	0.631032
AT5G22330.1	1.431	0.285549	0.363629	0.656072
AT3G17170.1	1.449	0.406481	0.360872	0.500715
AT1G06960.1	1.502	0.276279	0.370613	0.676581
AT5G59613.2	1.604	0.288908	0.361544	0.647181
AT1G06960.3	1.524	0.266354	0.371556	0.692794
AT1G06960.2	1.522	0.270349	0.367654	0.68191
AT3G24515.1	2.013	0.235641	0.36949	0.733157
AT1G02050.1	1.843	0.234951	0.375492	0.737071
AT4G26080.1	2.456	0.24577	0.380795	0.729604
AT3G52150.2	1.616	0.354477	0.357005	0.551824
AT3G52150.1	1.599	0.358417	0.354466	0.544042
AT4G15820.1	1.43	0.299119	0.358873	0.631218
AT2G43410.3	2.242	0.243698	0.37844	0.731253
AT3G52890.1	1.939	0.220808	0.381817	0.768098
AT5G09590.1	1.942	0.288392	0.381873	0.667827
AT1G12270.1	1.593	0.310919	0.363048	0.617256
AT3G12570.1	1.659	0.272643	0.372891	0.682759
AT3G12570.3	1.669	0.267461	0.371445	0.688944
AT3G12570.2	1.691	0.276025	0.373161	0.677645
AT3G12570.4	1.683	0.261343	0.371405	0.698237
AT5G55070.1	1.661	0.269185	0.374805	0.691451
AT4G02520.1	1.757	0.324344	0.37236	0.610211
AT3G52140.4	1.951	0.288473	0.373102	0.659329
AT2G40830.3	1.888	0.22626	0.378638	0.757456
AT2G40830.1	1.83	0.235778	0.375823	0.740176
AT5G29000.1	1.687	0.241307	0.366486	0.724645
AT3G52140.1	1.914	0.294663	0.37102	0.648103
AT3G52140.2	1.943	0.29322	0.373137	0.652237
AT5G29000.2	1.708	0.236935	0.367251	0.73227
AT5G39840.1	1.976	0.237615	0.388084	0.746789
AT1G10570.1	1.969	0.252248	0.380918	0.718487
AT2G36000.2	1.877	0.30293	0.364728	0.625148
AT1G10570.2	1.963	0.252595	0.38106	0.718488
AT5G63310.1	1.506	0.342814	0.357184	0.566779
ATMG01390.1	2.793	0.261069	0.393361	0.696712
AT5G53120.4	1.949	0.21453	0.374777	0.775052
AT1G21240.1	3.216	0.140295	0.418658	0.906472
AT2G05310.1	2.007	0.338362	0.362987	0.578091
AT4G38090.4	1.775	0.240253	0.381581	0.739637
AT2G42770.1	1.899	0.22747	0.364926	0.744516
AT4G12970.1	1.747	0.293174	0.379815	0.660609
AT4G38090.1	1.687	0.256702	0.375941	0.708671
AT1G80810.2	2.064	0.267583	0.383014	0.697101
AT4G38090.3	1.763	0.237068	0.380095	0.742947
AT4G38090.2	1.87	0.234415	0.38913	0.755071
AT3G22520.1	1.86	0.269878	0.368434	0.682391
AT4G00026.1	1.683	0.311362	0.366551	0.621218
AT5G50640.1	1.964	0.269958	0.373921	0.68677
AT1G55330.1	1.417	0.297618	0.35485	0.626657
AT1G48790.1	1.786	0.256399	0.373194	0.705717
AT1G35460.1	1.991	0.261687	0.380256	0.70156
AT1G49470.1	3.49	0.19974	0.404038	0.810726
AT5G52280.1	1.747	0.310966	0.359551	0.611329
AT1G73820.1	1.81	0.283661	0.372302	0.666903
AT5G53120.3	1.967	0.215639	0.377507	0.77569
AT1G75220.1	1.857	0.296027	0.380557	0.657318
AT3G48560.1	1.636	0.376657	0.347691	0.510734
AT1G16320.1	1.612	0.268022	0.359376	0.676828
AT1G11430.1	1.749	0.353429	0.353838	0.549588
AT4G01100.2	1.724	0.297277	0.365	0.641233
AT4G01100.1	1.711	0.308337	0.364923	0.625594
AT3G62220.1	2.06	0.236171	0.372591	0.736338
AT2G47640.4	1.538	0.276747	0.355105	0.650898
AT1G61310.1	1.89	0.227455	0.372077	0.75138
AT1G07810.1	1.86	0.252045	0.367444	0.705214
AT1G80500.1	1.498	0.281211	0.36704	0.668116
AT2G47640.1	1.559	0.287696	0.358114	0.638526
AT2G47640.2	1.589	0.297052	0.362359	0.629754
AT2G47640.3	1.575	0.292668	0.360786	0.63371
AT5G57760.1	1.609	0.274933	0.365193	0.672106
AT1G68590.1	1.729	0.316365	0.361612	0.605819
AT1G68590.2	1.725	0.306002	0.369007	0.630663
AT3G19180.2	2.435	0.209519	0.389828	0.788931
AT2G18160.1	1.714	0.27593	0.371342	0.677573
AT1G75510.1	1.447	0.319269	0.352268	0.593251
AT4G30160.2	1.947	0.250333	0.374384	0.718666
AT1G68725.1	1.867	0.244481	0.366352	0.718072
AT1G73230.1	1.494	0.331941	0.35355	0.576814
AT1G66410.2	2.007	0.311478	0.374987	0.631822
AT1G66410.1	1.792	0.381878	0.359044	0.521127
AT1G04430.2	1.692	0.318081	0.363176	0.606056
AT2G38720.1	1.853	0.217981	0.373129	0.766674
AT5G07470.1	1.523	0.312537	0.371118	0.625888
AT4G12040.1	1.672	0.271149	0.372743	0.681494
AT4G27280.1	1.298	0.336215	0.364036	0.5881
AT1G32130.2	1.552	0.3109	0.362437	0.618547
AT1G76800.1	1.88	0.250264	0.375684	0.721764
AT1G69230.1	1.847	0.209202	0.387579	0.793062
AT3G12145.1	2.358	0.255525	0.383303	0.715483
AT5G65310.1	1.663	0.296487	0.360458	0.631529
AT3G11170.1	1.656	0.343333	0.363871	0.57441
AT1G26760.1	2.164	0.251543	0.384629	0.723769
AT1G76820.1	2.103	0.276583	0.372763	0.676454
AT3G58640.2	1.975	0.243693	0.376437	0.729611
AT5G53460.2	2.094	0.31532	0.362242	0.609095
AT3G54400.1	1.789	0.27127	0.371255	0.684575
AT1G24040.1	2.454	0.245038	0.397329	0.742297
AT4G35830.1	1.695	0.331316	0.362845	0.587597
AT4G22140.1	2.172	0.262492	0.387821	0.706262
AT4G22140.2	2.04	0.285752	0.376068	0.663523
AT2G33730.1	1.823	0.341091	0.361001	0.572167
AT3G26782.1	1.663	0.201241	0.367177	0.789768
AT3G55240.1	2.207	0.172699	0.366125	0.833971
AT4G33666.1	1.476	0.277426	0.370034	0.674796
AT4G21810.1	1.917	0.256909	0.378242	0.710214
AT5G11260.1	1.835	0.236904	0.383695	0.747774
AT4G05420.1	1.755	0.274579	0.373006	0.678844
AT4G05420.2	1.747	0.275294	0.373076	0.678013
AT5G61160.1	1.808	0.244864	0.380649	0.730178
AT3G01540.4	1.987	0.324826	0.357539	0.587774
AT4G18390.1	1.556	0.215839	0.36571	0.764053
AT3G07950.1	1.965	0.246884	0.38555	0.730391
AT3G55260.1	1.961	0.268089	0.376682	0.689207
AT5G56950.1	1.716	0.319757	0.370345	0.614585
AT3G24120.2	1.724	0.250821	0.367134	0.709285
AT3G24120.1	1.508	0.278242	0.353124	0.650033
AT1G50490.1	1.694	0.25653	0.379479	0.717267
AT1G65470.2	1.905	0.241736	0.371829	0.725297
AT3G31161.1	1.358	0.505408	0.307778	0.320118
AT3G23600.1	1.602	0.344056	0.362248	0.569768
AT1G54050.1	1.604	0.313044	0.367013	0.619312
AT2G39930.1	2.089	0.263261	0.370868	0.692705
AT2G38810.3	1.778	0.251123	0.368835	0.713241
AT2G38810.2	1.738	0.277996	0.373255	0.677418
AT2G38810.1	1.778	0.252256	0.370772	0.713766
AT5G38870.1	1.432	0.262677	0.370204	0.697567
AT4G22320.1	1.659	0.309695	0.367683	0.623212
AT4G22320.2	1.663	0.300545	0.370499	0.640881
AT4G23600.1	2.02	0.291496	0.36897	0.647479
AT1G65280.1	1.435	0.319539	0.351984	0.591093
AT4G23600.3	2.08	0.27915	0.371284	0.667468
AT1G13880.1	2.035	0.273657	0.373654	0.680259
AT3G26510.4	1.812	0.305679	0.37329	0.636854
AT3G26510.5	1.973	0.232288	0.367082	0.740482
AT4G15130.1	1.805	0.31387	0.364029	0.609827
AT3G47370.1	1.598	0.294613	0.369735	0.648294
AT3G26510.1	1.858	0.276618	0.368585	0.67341
AT3G26510.2	1.827	0.306886	0.373815	0.63543
AT3G26510.3	1.915	0.243724	0.370736	0.726857
AT3G46610.1	1.802	0.286125	0.362667	0.651488
AT2G15280.2	1.513	0.222619	0.365173	0.754232
AT2G15280.1	1.519	0.23604	0.366456	0.733285
AT2G30260.1	1.53	0.312244	0.370373	0.626358
AT1G12880.1	2.206	0.21883	0.381586	0.763696
AT4G32570.1	1.775	0.244438	0.36657	0.715307
AT5G14740.5	1.871	0.311171	0.381509	0.641155
AT5G65620.1	1.875	0.32291	0.360648	0.596541
AT1G72250.1	2.439	0.218379	0.384448	0.775491
AT1G72250.2	2.337	0.228271	0.384959	0.76081
AT1G14410.1	1.808	0.281892	0.377195	0.674927
AT2G30200.2	1.597	0.26687	0.364431	0.683607
AT3G16180.1	1.692	0.256591	0.375553	0.710528
AT1G55810.3	1.972	0.261545	0.374701	0.697572
AT2G30200.1	1.526	0.30734	0.356446	0.613675
AT1G63120.1	1.626	0.241671	0.380186	0.737215
AT4G34030.1	1.738	0.302262	0.368967	0.636816
AT2G41750.1	1.534	0.249187	0.36957	0.712847
AT4G22930.1	1.93	0.257155	0.375284	0.706847
AT3G47910.2	1.9	0.265227	0.366484	0.684003
AT4G37310.1	1.814	0.214671	0.371299	0.770585
AT3G60380.1	2.167	0.247075	0.376806	0.722129
AT5G16070.1	1.746	0.283576	0.375536	0.669118
AT4G33650.2	2.387	0.240065	0.386981	0.741262
AT1G78570.1	1.714	0.281014	0.363875	0.659451
AT4G33650.1	2.341	0.242983	0.383182	0.733202
AT1G27350.1	1.797	0.311042	0.381302	0.635348
AT5G64360.4	1.851	0.270262	0.379521	0.691302
AT5G64360.3	1.795	0.272395	0.374323	0.682028
AT5G64360.2	1.922	0.261097	0.380475	0.704886
AT5G64360.1	2.047	0.25337	0.388248	0.723902
AT2G30950.1	1.534	0.391286	0.353263	0.505405
AT1G18700.2	1.853	0.219407	0.370073	0.762737
AT1G18700.3	1.781	0.225769	0.366649	0.749474
AT1G18700.1	1.791	0.231782	0.371474	0.744689
AT1G68190.1	1.953	0.274639	0.369792	0.676818
AT1G18700.4	1.789	0.227239	0.37031	0.750998
AT1G53885.1	1.672	0.251339	0.373731	0.714237
AT5G63840.1	1.749	0.276488	0.364282	0.667725
AT5G26910.3	2.105	0.253346	0.377327	0.714695
AT3G10040.1	1.95	0.244743	0.382858	0.736101
AT1G69250.1	1.747	0.235992	0.368914	0.734786
AT1G69250.2	1.789	0.219874	0.36757	0.758802
AT3G03460.1	1.568	0.230131	0.378504	0.753882
AT3G58670.1	1.653	0.241982	0.387535	0.742363
AT1G72640.2	2.018	0.341653	0.370118	0.579631
AT3G11630.1	1.613	0.402641	0.336297	0.467445
AT2G47840.1	1.633	0.294289	0.365444	0.642718
AT2G34090.3	1.583	0.221738	0.373618	0.761729
AT3G54090.1	1.662	0.346953	0.351207	0.554031
AT2G34090.1	1.658	0.231067	0.376929	0.750089
AT2G33770.1	1.833	0.26639	0.371222	0.689836
AT3G59310.1	2.222	0.222683	0.379561	0.763622
AT3G61070.1	2.093	0.241422	0.369865	0.720075
AT5G39350.1	1.771	0.228994	0.369348	0.744192
AT3G54840.2	1.594	0.245598	0.362902	0.714939
AT1G08180.1	1.464	0.254835	0.375216	0.714768
AT5G57930.1	1.884	0.305138	0.369537	0.628911
AT5G57930.2	1.884	0.314913	0.365793	0.60915
AT5G52370.1	1.551	0.28995	0.362968	0.647946
AT1G20510.1	1.56	0.321549	0.362374	0.601846
AT1G20510.2	1.62	0.306821	0.363378	0.624552
AT5G14570.1	2.081	0.22773	0.38201	0.758699
AT2G25355.1	1.592	0.258827	0.375651	0.704081
AT1G25450.1	1.699	0.272722	0.371419	0.682374
AT2G17530.2	1.977	0.23962	0.376062	0.73595
AT5G09740.1	1.643	0.318845	0.375342	0.621546
AT2G44620.1	1.553	0.284647	0.359893	0.651946
AT4G35110.4	2.051	0.229033	0.379662	0.755761
AT4G35110.3	2.078	0.226777	0.383384	0.762261
AT4G35110.2	2.069	0.227268	0.383193	0.76137
AT4G35110.1	2.078	0.222946	0.381634	0.766636
AT2G42590.3	1.449	0.300081	0.354088	0.621407
AT2G42590.2	1.509	0.317756	0.346162	0.583594
AT2G42590.1	1.479	0.31668	0.343027	0.580672
AT5G09850.1	2.069	0.26118	0.375985	0.701434
AT1G16880.2	1.648	0.32589	0.3684	0.602269
AT1G16880.1	1.853	0.346782	0.36336	0.565902
AT2G27450.2	1.762	0.243377	0.373075	0.729024
AT4G09180.1	1.681	0.287218	0.371008	0.659027
AT1G45688.1	1.615	0.313042	0.357953	0.606252
AT1G28420.1	2.623	0.249658	0.378492	0.718404
AT1G45688.2	1.699	0.293516	0.365926	0.643296
AT2G21620.2	1.742	0.301139	0.369911	0.638403
AT4G35100.1	1.676	0.36027	0.360361	0.544999
AT4G35100.2	1.713	0.333314	0.367499	0.589294
AT2G21620.1	1.64	0.319436	0.361292	0.603533
AT4G00950.1	1.534	0.293434	0.367646	0.649397
AT1G32790.1	1.706	0.29636	0.372245	0.650999
AT1G65790.1	2.12	0.253491	0.372954	0.708309
AT4G00090.1	1.729	0.274747	0.367523	0.674698
AT1G29970.1	1.441	0.255701	0.366806	0.703892
AT1G29970.3	1.508	0.216488	0.360092	0.759606
AT1G29970.2	1.407	0.280543	0.356419	0.65309
AT5G57700.3	1.616	0.254092	0.369474	0.707764
AT5G57700.2	1.629	0.247262	0.364749	0.712436
AT5G57700.1	1.64	0.239089	0.366599	0.72839
AT2G02230.1	1.578	0.34489	0.367556	0.577473
AT5G10870.1	1.852	0.250843	0.371137	0.714738
AT5G57700.4	1.601	0.256681	0.368539	0.70287
AT1G29950.2	1.65	0.217502	0.363711	0.760904
AT1G29950.1	1.606	0.229133	0.361419	0.739744
AT3G07060.1	2.284	0.202745	0.390439	0.800641
AT5G28770.2	1.816	0.278385	0.368458	0.669035
AT1G64140.1	1.734	0.290434	0.362238	0.643405
AT1G19010.1	2.092	0.267955	0.385702	0.701528
AT4G33630.1	1.606	0.313938	0.365519	0.618147
AT4G33630.2	1.637	0.309844	0.367399	0.625793
AT3G51420.1	1.945	0.306153	0.370305	0.631538
AT3G48760.1	1.553	0.297751	0.364763	0.638664
AT1G17880.1	1.978	0.328638	0.356859	0.580269
AT1G36980.1	1.831	0.278837	0.367749	0.667528
AT5G62190.1	1.624	0.345379	0.358564	0.565437
AT2G38950.1	2.006	0.243416	0.372262	0.726519
AT1G32220.1	2.044	0.297527	0.377585	0.650111
AT4G24830.2	1.738	0.255375	0.361318	0.695421
AT5G10660.2	7	0.20161	1.11366	0.970441
AT2G14120.1	2.113	0.258579	0.373668	0.703236
AT4G17330.1	1.885	0.274926	0.376942	0.681971
AT2G14120.2	2.116	0.257226	0.373245	0.704782
AT1G07350.1	1.743	0.254725	0.372072	0.710636
AT4G02890.1	1.527	0.336038	0.362032	0.583122
AT4G02890.2	1.543	0.31807	0.36027	0.60476
AT1G09760.1	1.62	0.282509	0.375429	0.674884
AT4G02890.4	1.487	0.343655	0.354717	0.56487
AT3G26980.1	1.984	0.243651	0.370299	0.724351
AT2G41231.1	7	0.209385	1.13351	0.969042
AT3G17120.2	1.9	0.210024	0.374392	0.780131
AT1G74510.1	2.219	0.240513	0.384553	0.739148
AT1G74510.2	2.296	0.213435	0.383927	0.781578
AT5G13810.1	1.855	0.243518	0.377036	0.731411
AT4G09890.1	1.518	0.307184	0.377009	0.638633
AT4G27990.1	1.585	0.275314	0.367885	0.673674
AT1G22690.1	1.447	0.303399	0.356133	0.617989
AT3G52850.1	1.835	0.325667	0.362009	0.594437
AT1G74910.1	1.473	0.269232	0.356922	0.673254
AT3G04730.1	1.531	0.27449	0.362011	0.670905
AT1G74910.3	1.489	0.26971	0.359579	0.675282
AT1G74910.2	1.46	0.27068	0.356643	0.670977
AT1G51720.1	1.643	0.285071	0.365593	0.655706
ATCG01300.1	1.63	0.220472	0.365597	0.755786
AT2G44360.1	1.993	0.295484	0.376164	0.647875
AT2G44680.1	1.942	0.244446	0.370968	0.722555
AT5G03540.1	2.115	0.286212	0.373257	0.664165
AT5G03540.2	2.142	0.271376	0.37331	0.686403
AT2G44680.2	1.951	0.235877	0.368862	0.734093
AT5G05950.1	2.223	0.235188	0.398894	0.759163
AT3G43300.1	1.855	0.256144	0.369563	0.703141
AT4G38490.1	1.854	0.234564	0.367531	0.735826
AT2G43590.1	2.13	0.23917	0.38817	0.74565
AT3G46670.1	1.898	0.254807	0.384925	0.717575
AT1G30580.1	1.63	0.322687	0.359323	0.595634
AT4G16950.1	1.697	0.297037	0.367124	0.641817
AT5G60390.3	1.568	0.372853	0.338488	0.503022
AT1G75760.1	1.754	0.250371	0.381575	0.723155
AT5G42000.2	1.685	0.287243	0.379904	0.669765
AT1G34220.2	1.936	0.238506	0.362865	0.723382
AT4G34090.1	1.723	0.217792	0.365808	0.762895
AT4G34090.3	1.497	0.277447	0.365395	0.670675
AT4G34090.2	1.763	0.217528	0.366019	0.763452
AT5G45710.1	2.12	0.21407	0.383827	0.782565
AT5G20280.1	1.664	0.327951	0.361572	0.593404
AT2G43770.1	1.976	0.274957	0.373228	0.675579
AT2G39720.1	1.8	0.251206	0.369476	0.710228
AT3G53670.1	1.579	0.250334	0.363762	0.708442
AT3G53670.2	1.618	0.233419	0.362635	0.734206
AT3G50910.1	1.846	0.255564	0.381038	0.714363
AT3G57230.2	1.56	0.224208	0.370971	0.758038
AT4G36870.1	1.989	0.25678	0.369118	0.701491
AT4G36870.2	2.014	0.253821	0.370665	0.708029
AT1G11790.1	1.784	0.238175	0.377261	0.738368
AT3G06070.1	1.506	0.316857	0.367823	0.617675
AT2G06510.2	1.827	0.24503	0.379768	0.730043
AT1G24180.1	1.539	0.288872	0.36066	0.644384
AT1G59710.1	2.043	0.210467	0.379075	0.785149
AT3G01710.1	1.687	0.261442	0.382194	0.708504
AT5G10180.1	1.716	0.304876	0.362601	0.625484
AT3G01710.2	1.751	0.263669	0.38631	0.708771
AT3G51830.1	2.007	0.252019	0.373261	0.710921
AT5G12040.2	2.076	0.237051	0.378082	0.738999
AT4G02200.1	1.981	0.244945	0.379646	0.728922
AT1G17145.1	1.551	0.283951	0.369739	0.663607
AT4G02200.3	2.068	0.22382	0.381533	0.762676
AT4G02200.2	1.865	0.231915	0.37632	0.748892
AT2G30520.3	1.749	0.246518	0.374355	0.724391
AT2G30520.2	1.799	0.23615	0.375857	0.742271
AT2G30520.1	1.704	0.261403	0.372563	0.699782
AT1G08420.2	2.098	0.257321	0.372102	0.703708
AT3G21175.3	1.546	0.232978	0.366884	0.740232
AT1G08420.1	2.047	0.268949	0.369392	0.682766
AT4G26965.2	2.086	0.2316	0.385283	0.756016
AT4G26965.1	2.136	0.22976	0.37952	0.75355
AT3G05880.1	1.338	0.346995	0.356927	0.562104
AT5G48630.1	1.826	0.278462	0.368624	0.665997
AT2G34585.1	1.389	0.280717	0.361238	0.660035
AT5G48230.1	1.714	0.251634	0.369548	0.711724
AT4G24330.1	2.056	0.294891	0.371363	0.647476
AT3G12955.1	3.112	0.125829	0.458897	0.933648
AT4G03415.2	1.748	0.268176	0.364484	0.681149
AT2G30530.1	1.65	0.241201	0.373643	0.729839
AT4G03415.1	1.734	0.269035	0.364775	0.680711
AT5G02290.2	1.574	0.307785	0.36787	0.627627
AT3G09770.1	1.782	0.289167	0.363653	0.647503
AT1G50300.1	1.664	0.316795	0.368724	0.612755
AT3G12600.2	1.686	0.295282	0.361771	0.632335
AT3G12600.1	1.776	0.295906	0.363968	0.632231
AT2G04790.2	1.768	0.229119	0.388994	0.76351
AT4G24470.2	1.974	0.227853	0.384661	0.75977
AT4G24470.3	2.033	0.214851	0.384615	0.780137
AT4G24470.1	1.955	0.233464	0.385088	0.751718
AT5G01460.1	1.995	0.240406	0.375948	0.733664
AT5G11680.1	1.628	0.289274	0.361018	0.645427
AT1G17980.2	2.19	0.233763	0.377887	0.741822
AT1G67900.2	2.111	0.211056	0.371986	0.778557
AT5G17630.1	1.809	0.235655	0.37013	0.737721
AT1G69060.1	2.156	0.236735	0.367579	0.729851
AT3G15660.1	1.96	0.312666	0.379281	0.634127
AT2G48160.1	1.878	0.273708	0.370199	0.677369
AT1G53210.1	1.746	0.291406	0.366163	0.649419
AT3G15660.2	1.967	0.315409	0.382685	0.634132
ATCG00130.1	1.838	0.205914	0.370058	0.785358
AT3G01320.2	2.126	0.243526	0.378151	0.729523
AT1G67900.1	2.1	0.210783	0.371156	0.778364
AT1G16410.1	2.01	0.28379	0.369615	0.660507
AT1G16410.2	1.927	0.280789	0.371519	0.669522
AT5G14430.1	1.747	0.273051	0.365935	0.673662
AT5G14430.2	1.749	0.269211	0.366005	0.679614
AT5G59880.2	1.703	0.329064	0.349536	0.57138
AT1G79080.1	1.919	0.27885	0.365135	0.664562
AT4G33480.1	1.518	0.307773	0.367157	0.62859
AT3G47370.2	1.607	0.286206	0.371848	0.662348
AT1G16470.2	1.793	0.217405	0.359396	0.755914
AT5G64880.1	1.482	0.268194	0.365002	0.684393
AT1G16470.1	1.717	0.2531	0.358101	0.695736
AT3G52720.2	1.748	0.221293	0.380224	0.770501
AT5G50210.1	1.828	0.252702	0.376429	0.715837
AT1G29890.1	2.03	0.220969	0.368624	0.758663
AT5G09443.1	1.566	0.255708	0.363552	0.695768
AT1G78210.1	1.629	0.255482	0.371289	0.706885
AT3G14980.1	2.086	0.240163	0.369808	0.727366
AT2G47910.1	1.341	0.34257	0.364009	0.579773
AT2G47910.2	1.394	0.299423	0.364999	0.63909
AT1G42990.1	1.638	0.27727	0.372237	0.676283
AT3G01090.1	1.761	0.25351	0.368102	0.702549
AT1G31150.1	1.952	0.205786	0.383314	0.792126
AT1G04300.3	1.848	0.287358	0.367482	0.656904
AT1G04300.2	1.869	0.280485	0.369335	0.669352
AT3G16370.1	1.93	0.308419	0.367386	0.622265
AT1G51570.1	1.693	0.310397	0.355423	0.60551
AT5G48180.1	1.596	0.374444	0.363101	0.536696
AT5G64220.1	2.093	0.22605	0.383787	0.760055
AT2G40430.2	1.585	0.292229	0.35508	0.634917
AT2G40430.3	1.55	0.31178	0.354726	0.606741
AT5G43020.1	2.188	0.209339	0.381636	0.785057
AT2G40430.1	1.568	0.308968	0.354274	0.609774
AT2G16405.1	1.744	0.230692	0.375987	0.749515
AT5G42100.2	1.792	0.298	0.367394	0.642481
AT5G42100.1	1.802	0.307244	0.366523	0.628094
AT3G16310.1	1.605	0.284441	0.367652	0.660686
AT1G07720.1	1.841	0.295845	0.373392	0.651612
AT5G58470.2	1.652	0.29295	0.369895	0.650767
AT5G63670.1	1.345	0.309189	0.360163	0.617878
AT1G50040.1	1.773	0.235994	0.377534	0.741159
AT1G67900.3	2.086	0.21806	0.372611	0.767992
AT5G63670.2	1.453	0.231019	0.360301	0.737655
AT3G52520.1	1.611	0.276657	0.354926	0.654647
AT5G54250.1	1.968	0.236879	0.375824	0.737219
AT5G54250.2	2.008	0.222808	0.373824	0.757606
AT5G54250.3	2.006	0.226965	0.376996	0.754053
AT2G40410.1	1.901	0.265425	0.369489	0.687275
AT2G40410.2	1.876	0.267699	0.368428	0.682948
AT3G28730.1	1.973	0.285545	0.374361	0.664389
AT1G25250.1	1.706	0.259587	0.366362	0.69771
AT5G05060.1	1.951	0.262428	0.372117	0.698896
AT2G38310.1	1.677	0.30749	0.364404	0.622821
AT3G55630.3	1.847	0.281818	0.374092	0.666916
AT1G58180.1	1.431	0.303926	0.357348	0.620271
AT3G55630.1	1.843	0.268213	0.379401	0.693529
AT1G58180.3	1.712	0.293132	0.362254	0.642388
AT1G58180.4	1.631	0.302544	0.356501	0.62101
AT2G36790.1	2.649	0.181399	0.38453	0.830029
AT2G34430.1	1.911	0.411591	0.349847	0.477441
AT3G27010.1	1.513	0.209798	0.360131	0.770974
AT1G54580.1	1.832	0.286331	0.369827	0.658279
AT2G01820.1	1.606	0.254663	0.369032	0.706081
AT1G26830.1	1.597	0.314193	0.361119	0.610699
AT2G47160.1	1.938	0.218462	0.377942	0.769228
AT1G51140.1	1.822	0.249074	0.366207	0.712441
AT2G47160.2	1.964	0.212479	0.37844	0.779173
AT5G12210.2	1.569	0.273388	0.366841	0.677528
AT5G55610.2	1.82	0.248698	0.376947	0.724573
AT5G55610.1	1.73	0.275067	0.379258	0.687083
AT5G12210.1	1.566	0.273841	0.366718	0.676777
AT5G13730.1	1.371	0.36563	0.356537	0.541549
AT1G20850.1	1.583	0.283935	0.36746	0.663028
AT1G22160.1	1.716	0.258807	0.382113	0.714817
AT2G18570.1	2.179	0.235835	0.375667	0.734917
AT1G14380.2	1.928	0.252471	0.379265	0.71926
AT1G14380.3	2.041	0.257569	0.375708	0.708055
AT1G74970.1	1.914	0.353638	0.358212	0.549389
AT1G14380.1	2.041	0.2574	0.374152	0.706439
AT1G47530.1	1.763	0.28348	0.359773	0.649449
AT3G16660.1	1.546	0.27944	0.36872	0.668473
AT3G02680.1	2.476	0.191892	0.391668	0.818637
AT3G62700.1	1.822	0.258761	0.372009	0.704004
AT2G42910.1	1.463	0.288432	0.367502	0.656829
AT4G02590.1	1.588	0.277833	0.360674	0.658894
AT3G62650.2	1.636	0.294706	0.375202	0.65746
AT5G55600.2	1.763	0.284857	0.374215	0.665483
AT5G24530.1	1.821	0.235226	0.376539	0.744709
AT4G08555.1	1.538	0.187826	0.368743	0.812934
AT3G03140.1	1.909	0.265161	0.377342	0.696096
AT5G58900.1	1.958	0.257285	0.375062	0.705535
AT1G23440.1	1.596	0.291428	0.375965	0.656979
AT4G27720.1	1.614	0.247931	0.362584	0.711656
AT2G24570.1	1.888	0.217374	0.370209	0.764327
AT3G61020.1	2.721	0.182549	0.404163	0.840959
AT3G28300.1	1.702	0.304487	0.361234	0.624264
AT3G44330.1	1.63	0.234537	0.367309	0.735182
AT2G27500.3	1.924	0.23294	0.373793	0.743547
AT5G49510.1	1.548	0.269561	0.370323	0.685412
AT2G22010.2	2.514	0.204853	0.388959	0.795642
AT4G00630.1	2.009	0.272046	0.37654	0.685606
AT4G27740.1	1.361	0.286405	0.360929	0.651476
AT4G12917.1	1.509	0.227047	0.35848	0.739144
AT1G15480.1	1.968	0.253574	0.379463	0.715224
AT1G75440.1	1.678	0.237	0.362669	0.727238
AT3G50970.1	1.835	0.259093	0.376439	0.705407
AT2G38640.1	1.673	0.250368	0.368759	0.714682
AT3G45260.1	1.565	0.266511	0.358349	0.679009
AT4G00355.1	1.761	0.275939	0.376692	0.681607
AT4G00355.2	1.775	0.280255	0.37984	0.678623
AT4G00355.3	1.814	0.260446	0.379299	0.7082
AT4G00355.4	1.869	0.254629	0.375517	0.71251
AT3G61060.1	1.756	0.226614	0.373943	0.753132
AT3G45240.3	1.799	0.23192	0.368734	0.739346
AT3G45240.2	1.745	0.231505	0.363377	0.735154
AT3G48360.1	1.626	0.356417	0.349643	0.537621
AT3G26710.1	1.577	0.304409	0.354189	0.615211
AT3G14930.2	2.027	0.320427	0.361673	0.60255
AT5G17160.1	2.013	0.263828	0.372396	0.69537
AT3G21140.1	1.88	0.253412	0.372697	0.711767
AT5G08470.1	2.043	0.239058	0.385414	0.744247
AT1G26620.1	2.352	0.222083	0.383783	0.768346
AT2G17350.1	1.502	0.392183	0.356966	0.50847
AT1G78020.1	1.72	0.288828	0.360341	0.642731
AT5G43720.1	1.613	0.278174	0.364095	0.665663
AT1G50020.1	1.385	0.276071	0.367037	0.674367
AT3G50210.2	1.645	0.253772	0.36096	0.699354
AT3G50210.3	1.586	0.266649	0.361538	0.681087
AT5G20680.2	2.228	0.23928	0.368082	0.725445
AT3G57530.1	1.714	0.338096	0.361774	0.580531
AT5G03710.1	1.279	0.351801	0.461494	0.648925
AT3G07700.3	1.721	0.266666	0.37002	0.689935
AT3G20100.1	1.567	0.239535	0.368651	0.729619
AT2G17340.1	1.61	0.282331	0.36739	0.663587
AT3G43720.1	1.377	0.319278	0.353414	0.594336
AT2G30140.1	2.141	0.240422	0.376071	0.729222
AT2G30140.2	2.14	0.239391	0.376429	0.73154
AT1G01260.3	1.78	0.21237	0.372367	0.774324
AT1G01260.2	1.743	0.216192	0.371538	0.767809
AT1G01260.1	1.78	0.211621	0.371761	0.774959
AT4G38225.3	2.036	0.288978	0.382557	0.668114
AT4G38225.2	1.971	0.286125	0.375331	0.660499
AT4G38225.1	1.932	0.30735	0.374233	0.629226
AT3G05730.1	1.314	0.329597	0.335662	0.555294
AT5G53940.1	1.412	0.315769	0.360965	0.608468
AT5G03730.2	1.925	0.264023	0.36402	0.683451
AT5G03730.1	1.913	0.265242	0.364562	0.682637
AT3G18535.1	1.806	0.280541	0.355743	0.648761
AT3G02720.1	1.718	0.268702	0.366107	0.681063
AT5G56740.1	2.018	0.230733	0.371946	0.746177
AT5G49015.2	1.507	0.294785	0.358618	0.634306
AT1G20620.2	2.055	0.381245	0.357323	0.516331
AT2G19430.1	1.632	0.248266	0.364653	0.711549
AT5G14600.1	2.035	0.190957	0.378391	0.812831
AT5G02500.2	1.983	0.330484	0.354817	0.574819
AT2G18510.1	1.817	0.265947	0.364041	0.681743
AT1G16260.1	1.979	0.267093	0.373568	0.690588
AT5G09860.1	1.897	0.236614	0.374981	0.736794
AT1G20620.1	2.032	0.396937	0.350996	0.489844
AT3G25030.1	1.74	0.281774	0.376872	0.676107
AT1G18300.1	1.558	0.291374	0.373168	0.659893
AT4G08980.1	1.58	0.26466	0.368541	0.690276
AT4G08980.2	1.679	0.227693	0.368749	0.748227
AT3G08000.1	1.994	0.205626	0.379056	0.791241
AT2G18890.1	1.82	0.26225	0.377503	0.704139
AT1G50430.1	1.573	0.309547	0.36312	0.620883
AT1G50430.2	1.62	0.309109	0.366225	0.625914
AT5G07740.1	1.916	0.257942	0.372767	0.703862
AT1G12900.2	1.696	0.367285	0.363033	0.541887
AT1G12900.3	1.697	0.380425	0.357294	0.518908
AT1G12900.1	1.925	0.377997	0.360641	0.526532
AT5G64330.2	2.095	0.263266	0.376014	0.698737
AT1G12900.4	1.726	0.355281	0.360539	0.553639
AT5G65760.1	2.35	0.240953	0.396248	0.747918
AT1G50450.1	1.523	0.330231	0.361697	0.58826
AT1G19600.1	1.705	0.303875	0.359765	0.621403
AT3G13730.1	1.763	0.213766	0.373988	0.773694
AT3G13690.1	1.821	0.256839	0.372682	0.706249
AT5G12980.1	1.652	0.223765	0.367596	0.754304
AT1G71210.1	2.038	0.189237	0.379369	0.816028
AT1G17970.1	1.688	0.251655	0.371584	0.716756
AT3G01472.1	1.685	0.264256	0.378769	0.701529
AT3G13320.1	2.263	0.229071	0.394541	0.763653
AT3G58140.1	1.631	0.323507	0.362101	0.60042
AT5G48570.1	1.349	0.339686	0.362544	0.581282
AT3G15220.1	1.82	0.233888	0.366175	0.733581
AT4G37930.1	1.74	0.383243	0.353543	0.510514
AT2G31740.1	1.73	0.247004	0.368673	0.717394
AT1G13360.1	1.5	0.246117	0.366194	0.718978
AT3G15770.2	1.674	0.216665	0.357	0.754072
AT1G13360.3	1.394	0.253929	0.363571	0.705948
AT1G13360.2	1.423	0.246232	0.366012	0.720569
AT3G14660.1	2.164	0.266348	0.368329	0.686984
AT1G09310.1	1.546	0.367661	0.366955	0.550713
AT5G15770.1	1.591	0.302995	0.39209	0.662851
AT5G38720.1	1.44	0.347384	0.364643	0.57176
AT3G48780.1	1.852	0.229964	0.369921	0.745882
AT3G15770.1	1.643	0.222287	0.356515	0.744839
AT5G64030.1	1.912	0.276652	0.364033	0.666757
AT3G59068.1	1.791	0.167427	0.366008	0.843695
AT4G12340.1	1.399	0.311061	0.354306	0.607005
AT5G19150.1	1.736	0.237333	0.368934	0.731688
AT5G19150.2	1.692	0.237306	0.365542	0.728282
AT5G50440.1	1.552	0.267395	0.373331	0.692173
AT3G22260.2	1.577	0.232995	0.365263	0.736198
AT3G22260.3	1.536	0.237824	0.364305	0.728124
AT3G22260.1	1.577	0.2302	0.365927	0.741814
AT3G15070.1	1.976	0.242039	0.379425	0.733773
AT1G66150.1	1.778	0.250437	0.36804	0.711937
AT1G03090.2	1.718	0.29661	0.366096	0.64123
AT3G27460.1	1.826	0.232063	0.37883	0.74939
AT1G03090.1	1.743	0.287354	0.366825	0.654941
AT5G50960.1	1.587	0.305624	0.368557	0.633507
AT5G26000.1	1.935	0.42096	0.355875	0.473286
AT5G26000.2	1.932	0.419495	0.35573	0.474625
AT3G04930.2	1.954	0.271999	0.367533	0.676715
AT4G25890.1	1.551	0.267139	0.372235	0.688672
AT3G04930.1	1.805	0.290198	0.362675	0.645874
AT3G22480.2	1.656	0.325028	0.368288	0.599715
AT3G22480.1	1.737	0.313413	0.369642	0.616636
AT4G02770.1	1.588	0.407975	0.349122	0.48096
AT1G70670.1	1.905	0.213149	0.369116	0.772635
AT4G33460.1	1.901	0.241423	0.372192	0.726714
AT3G61700.1	1.918	0.243666	0.37983	0.732466
AT1G30970.2	1.616	0.246001	0.361139	0.709682
AT1G30970.1	1.635	0.263022	0.365081	0.686543
AT5G05200.1	1.638	0.322927	0.352725	0.588676
AT4G25870.1	1.818	0.251945	0.379529	0.718799
AT5G27390.1	1.69	0.29529	0.369643	0.646092
AT4G14600.1	1.659	0.231656	0.375637	0.750534
AT2G16900.1	2.127	0.246404	0.384852	0.7321
AT2G16900.3	2.057	0.243947	0.380436	0.732281
AT2G16900.2	1.923	0.280366	0.378626	0.675892
AT1G73180.2	1.648	0.252055	0.366851	0.708109
AT1G04780.1	1.903	0.287466	0.357395	0.641504
AT2G29540.1	1.405	0.305554	0.355995	0.616686
AT5G50315.1	1.987	0.254384	0.37709	0.713223
AT5G35450.1	2.611	0.185281	0.377167	0.819506
AT1G52930.1	1.445	0.304064	0.374437	0.643217
AT1G75630.2	1.949	0.19096	0.360495	0.798325
AT1G75630.1	1.623	0.260804	0.36182	0.689509
AT1G10450.1	2.156	0.242204	0.392373	0.742313
AT5G20290.1	1.895	0.414483	0.360438	0.48409
AT5G13680.1	2.467	0.233987	0.391659	0.753361
AT5G09860.2	1.896	0.24083	0.376609	0.731833
AT1G21400.1	1.677	0.209132	0.361213	0.770433
AT2G05250.1	1.994	0.265276	0.37816	0.69895
AT4G14030.1	1.417	0.28795	0.360376	0.648234
AT1G53110.1	1.677	0.254444	0.365989	0.702374
AT3G52105.1	1.752	0.207265	0.376339	0.788347
AT5G46330.1	2.28	0.222276	0.377983	0.761861
AT1G64355.1	1.795	0.260869	0.369403	0.694844
AT5G51960.1	1.646	0.241627	0.380354	0.737595
AT3G09920.1	1.953	0.274531	0.37547	0.682186
AT2G01670.1	1.635	0.315206	0.365756	0.612919
AT3G56310.1	1.611	0.307018	0.366701	0.628234
AT3G56310.2	1.602	0.301374	0.366933	0.636535
AT2G32180.1	1.355	0.35755	0.344816	0.532801
AT1G77020.1	2.107	0.227105	0.395331	0.768551
AT4G36210.1	1.789	0.296673	0.368552	0.645841
AT1G78040.2	1.724	0.403809	0.356511	0.495325
AT4G36210.3	1.771	0.315938	0.368209	0.618098
AT5G59440.1	1.514	0.282888	0.362618	0.65902
AT3G07640.1	1.438	0.292793	0.371765	0.655899
AT1G30880.1	1.392	0.331181	0.354667	0.578824
AT1G80670.1	2.227	0.248047	0.377117	0.718722
AT3G60200.1	1.853	0.227498	0.38478	0.761723
AT4G13640.2	1.752	0.275159	0.37219	0.678848
AT4G13640.1	1.662	0.269112	0.365362	0.680656
AT5G13240.1	1.757	0.261803	0.370442	0.693376
AT4G38710.2	1.733	0.348915	0.358123	0.558349
AT3G07660.1	1.74	0.238842	0.368549	0.729662
AT4G31130.1	2.074	0.234562	0.369782	0.735859
AT3G27690.1	1.647	0.357581	0.368111	0.564645
AT2G30390.1	1.964	0.317166	0.361271	0.603969
AT2G29310.2	1.679	0.27689	0.378403	0.684868
AT1G08660.1	1.478	0.257111	0.356282	0.688254
AT2G30390.2	2.015	0.301977	0.366765	0.632708
AT3G60590.4	1.532	0.298057	0.377797	0.652598
AT3G15360.1	1.454	0.321202	0.354445	0.591056
AT1G17340.1	2.132	0.247223	0.377531	0.723399
AT2G27770.1	1.91	0.247701	0.385421	0.73196
AT5G54290.1	1.518	0.315109	0.366685	0.616683
AT5G54290.2	1.654	0.301458	0.367737	0.637346
AT2G21470.3	1.946	0.235421	0.37802	0.738775
AT2G21470.2	2.063	0.226461	0.386277	0.761251
AT2G21470.1	1.921	0.238897	0.376836	0.732742
AT5G49160.1	1.762	0.256998	0.374853	0.707695
AT4G28490.1	1.65	0.256022	0.370964	0.70591
AT2G02560.2	2.059	0.238993	0.381853	0.740385
AT1G72680.1	1.57	0.238667	0.36497	0.72693
AT2G02560.1	2.061	0.238017	0.381703	0.741762
AT2G35630.1	1.792	0.27798	0.369417	0.670501
AT3G02260.1	2.693	0.201703	0.383144	0.797336
AT3G46940.1	1.664	0.266338	0.371997	0.690318
AT5G41700.5	1.688	0.241673	0.360331	0.719038
AT3G61700.2	1.939	0.237519	0.380515	0.742545
AT5G41700.1	1.555	0.31533	0.359981	0.608456
AT3G44100.1	1.457	0.283829	0.367328	0.663758
AT5G41700.3	1.578	0.259791	0.366671	0.697451
AT1G24147.1	1.512	0.287423	0.366762	0.657868
AT2G37230.1	1.635	0.284254	0.368856	0.663425
AT4G21650.1	2.015	0.237701	0.384943	0.745277
AT3G16060.1	2.014	0.306859	0.367874	0.624337
AT4G24930.1	1.679	0.312196	0.372396	0.629468
AT3G05250.1	1.803	0.253795	0.383848	0.719779
AT1G20050.1	1.917	0.283016	0.373137	0.667429
AT1G06470.2	1.955	0.225595	0.383027	0.760952
AT3G10220.1	1.811	0.265809	0.370123	0.689285
AT3G59970.1	1.629	0.318417	0.363176	0.609053
AT1G80230.1	1.773	0.29755	0.373489	0.648587
AT3G59970.3	1.603	0.337211	0.362048	0.5822
AT1G55000.2	2.16	0.261348	0.384606	0.71065
AT1G55000.3	2.126	0.266466	0.382464	0.700478
AT1G55000.1	2.145	0.271055	0.38305	0.69454
AT2G30695.1	1.538	0.302637	0.356773	0.620665
AT2G30695.2	1.694	0.259888	0.362562	0.689851
AT2G20950.4	1.976	0.255472	0.374714	0.710646
ATCG00670.1	1.522	0.261693	0.369726	0.698147
AT1G62045.1	1.576	0.211454	0.364186	0.768425
AT2G20880.1	1.572	0.256253	0.372912	0.708604
AT2G05620.1	1.881	0.313579	0.373097	0.625895
AT1G22790.2	1.825	0.238622	0.371655	0.73418
AT5G27470.1	1.411	0.327247	0.34952	0.5779
AT1G11050.1	2.04	0.235137	0.384171	0.749105
AT3G58470.1	1.617	0.254768	0.363348	0.700325
AT1G55020.1	1.724	0.250305	0.377245	0.719217
AT1G56300.1	1.89	0.31257	0.371625	0.620633
AT1G21920.1	1.828	0.246578	0.376528	0.726921
AT4G09000.2	1.612	0.301411	0.361292	0.62796
AT4G09000.1	1.597	0.337735	0.35812	0.574099
AT5G60800.2	1.476	0.333013	0.357466	0.583073
AT5G60800.1	1.507	0.347673	0.357851	0.564176
AT4G25130.1	1.702	0.363529	0.347953	0.527064
AT2G47470.4	1.831	0.380349	0.359683	0.524042
AT2G47470.3	1.837	0.374014	0.361923	0.534427
AT2G47470.2	1.808	0.370613	0.358456	0.533158
AT2G47470.1	1.802	0.386202	0.355979	0.51128
AT5G04990.1	1.506	0.284809	0.360091	0.651111
AT3G46430.1	1.387	0.312102	0.360386	0.613207
AT3G05230.2	1.632	0.251459	0.375301	0.717996
AT3G54790.1	1.859	0.228745	0.376484	0.750376
AT5G23290.1	1.489	0.296807	0.36166	0.630974
AT3G47860.1	1.505	0.339015	0.363475	0.581851
AT2G26970.2	1.569	0.276531	0.37673	0.684785
AT2G26970.1	1.579	0.294872	0.378309	0.659184
AT2G21880.2	2.385	0.197933	0.397978	0.813706
AT2G21880.1	2.088	0.219699	0.38562	0.771655
AT4G20960.1	1.961	0.302096	0.377607	0.642246
AT2G39770.1	1.512	0.314826	0.360796	0.609257
AT4G12460.1	2.529	0.23952	0.39748	0.749018
AT4G12460.2	2.649	0.233785	0.39744	0.757051
AT2G39770.2	1.51	0.317683	0.36088	0.605397
AT4G32850.8	1.823	0.276315	0.372021	0.676108
AT1G72690.1	1.933	0.207835	0.374334	0.780434
AT1G16180.1	1.871	0.28315	0.371222	0.666453
AT1G72500.1	2.234	0.191647	0.375747	0.809209
AT2G27040.1	1.967	0.227241	0.381102	0.758575
AT3G58780.3	6.922	0.146908	0.623086	0.948781
AT4G28706.2	1.753	0.271982	0.365812	0.677572
AT5G63940.1	1.782	0.235319	0.368016	0.73312
AT4G19490.1	1.975	0.236687	0.377155	0.741355
AT4G19490.2	2.026	0.234813	0.380032	0.746639
AT5G01260.2	1.889	0.250836	0.376464	0.714286
AT5G01260.1	2.127	0.215709	0.381268	0.77291
AT3G12030.1	1.657	0.265203	0.394324	0.716211
AT5G61330.1	1.586	0.32884	0.362724	0.591952
AT1G12650.2	1.636	0.25757	0.360447	0.690492
AT1G12650.3	1.63	0.257441	0.360265	0.690326
AT1G12650.1	1.63	0.252476	0.3592	0.69716
AT5G19910.2	1.754	0.201985	0.367506	0.788204
AT1G03210.1	1.491	0.247885	0.365983	0.714668
AT1G12650.4	1.621	0.254787	0.359243	0.693221
AT3G12050.2	1.618	0.269411	0.353095	0.664402
AT5G11640.1	1.837	0.248799	0.376033	0.720361
AT3G23820.1	1.946	0.324101	0.360209	0.593379
AT3G12050.1	1.588	0.298167	0.354136	0.624435
AT3G08890.1	1.73	0.256016	0.369996	0.703621
AT3G08890.2	1.855	0.249495	0.375407	0.717709
AT5G02530.2	1.469	0.292483	0.365737	0.649134
AT4G15760.2	1.789	0.237179	0.379489	0.745839
AT2G33550.1	1.596	0.297243	0.371756	0.647869
AT5G02530.1	1.463	0.308863	0.363912	0.623559
AT4G09340.1	2.235	0.214154	0.399243	0.791697
AT1G04280.1	1.868	0.269527	0.371812	0.685252
AT5G10750.1	1.911	0.249448	0.370179	0.714526
AT2G34730.1	1.876	0.245335	0.372108	0.721714
AT4G20440.1	1.764	0.234265	0.371456	0.743224
AT2G23080.1	1.57	0.241954	0.364423	0.72236
AT2G23080.2	1.659	0.227681	0.366792	0.746008
AT4G00890.1	1.843	0.228415	0.378114	0.754374
AT1G01910.5	1.592	0.266636	0.360469	0.67834
AT1G01910.4	1.666	0.266127	0.366805	0.686478
AT5G10770.1	2.244	0.185055	0.389918	0.827719
AT1G54390.6	1.854	0.242937	0.373089	0.724693
AT1G01910.1	1.61	0.275974	0.363856	0.66874
AT1G68060.1	1.557	0.31042	0.360611	0.614512
AT4G23940.1	1.723	0.249357	0.371979	0.718314
AT1G01910.2	1.604	0.292611	0.364289	0.644286
AT2G27290.1	1.414	0.309291	0.358075	0.614337
AT4G01280.1	1.518	0.242424	0.356325	0.711277
AT4G01280.2	1.544	0.247171	0.359153	0.706761
AT5G20170.1	2.294	0.224964	0.380751	0.76203
AT5G52110.1	1.529	0.234332	0.366348	0.734128
AT4G33350.2	1.61	0.298156	0.368665	0.644386
AT5G52110.2	1.61	0.211554	0.368604	0.773369
AT3G13810.1	1.795	0.242669	0.372247	0.727814
AT1G06890.1	1.885	0.252219	0.372691	0.712016
AT5G27410.2	2.021	0.22409	0.385764	0.766148
AT3G13810.2	1.795	0.232369	0.37484	0.747709
AT5G17520.1	1.844	0.245596	0.376457	0.726926
AT1G33700.1	2.828	0.166917	0.401524	0.861917
AT4G31300.1	1.516	0.299211	0.357801	0.626389
AT3G16570.1	1.831	0.28978	0.372336	0.655181
AT1G61240.3	2.079	0.208114	0.379834	0.787178
AT3G23760.1	1.416	0.294911	0.36384	0.642725
AT1G61240.1	2.053	0.209128	0.377106	0.783114
AT1G06890.2	1.838	0.248285	0.367972	0.712922
AT1G61240.4	2.117	0.198848	0.378154	0.80036
AT4G11260.1	1.611	0.336548	0.350231	0.562467
AT2G20190.1	2.229	0.258	0.378025	0.707116
AT3G61210.1	1.433	0.269173	0.365811	0.684009
AT5G27990.1	1.518	0.292227	0.365475	0.646849
AT3G04080.1	2.46	0.231171	0.394135	0.760423
AT2G41710.1	1.851	0.290342	0.365651	0.648414
AT2G41710.2	1.855	0.283329	0.366071	0.659507
AT1G33390.1	2.285	0.236924	0.384855	0.745269
AT2G35020.1	2.151	0.260567	0.381209	0.700821
AT3G43520.1	1.489	0.313755	0.357444	0.605494
AT5G65940.1	1.841	0.309599	0.370532	0.627693
AT1G12750.2	1.941	0.227052	0.381231	0.757657
AT5G59160.1	1.566	0.262042	0.37525	0.701833
AT5G38560.1	1.998	0.256473	0.373174	0.704698
AT5G05660.1	1.984	0.251192	0.378452	0.716291
AT1G23100.1	2.126	0.256865	0.393783	0.72409
ATCG00580.1	1.347	0.195311	0.357174	0.79266
AT1G77510.1	1.884	0.240632	0.37425	0.733848
AT5G54770.1	1.55	0.397852	0.343812	0.483516
AT2G45680.1	1.902	0.256385	0.370215	0.704417
AT1G27150.1	1.866	0.241476	0.36957	0.725707
AT1G15030.1	1.795	0.25733	0.376022	0.710465
AT4G18370.1	1.743	0.306857	0.361385	0.620089
AT3G47490.1	1.823	0.267574	0.377423	0.695845
AT4G19110.1	1.852	0.291473	0.366038	0.646563
AT1G16430.1	1.499	0.256638	0.373592	0.705725
AT4G19110.3	1.719	0.29603	0.365988	0.641767
AT4G19110.2	1.855	0.286946	0.364962	0.651414
AT3G07860.1	1.707	0.269925	0.373824	0.690352
AT5G19190.1	1.483	0.339621	0.352727	0.566872
AT2G04390.1	1.735	0.324164	0.364382	0.600882
AT1G77350.2	1.815	0.233005	0.375763	0.745227
AT5G40300.1	1.907	0.198499	0.367316	0.79416
AT3G26310.1	1.718	0.233423	0.377674	0.747637
AT5G12470.1	1.877	0.286479	0.369007	0.655573
AT5G65990.1	1.524	0.267933	0.371492	0.689267
AT3G13440.1	1.912	0.255923	0.366273	0.699883
AT1G64990.1	1.716	0.261232	0.376877	0.701714
AT2G37640.1	2.135	0.240777	0.383711	0.740113
AT1G05840.1	1.986	0.232335	0.393704	0.760107
AT4G38510.1	1.507	0.318246	0.366719	0.613707
AT4G38510.2	1.52	0.31694	0.365416	0.613401
AT4G38510.3	1.532	0.31513	0.367238	0.618202
AT4G38510.4	1.518	0.315896	0.367005	0.617087
AT4G38510.5	1.527	0.307238	0.365622	0.626682
AT1G68260.1	1.714	0.263542	0.376838	0.700322
AT1G57680.2	1.425	0.270247	0.362023	0.678226
AT3G25410.1	1.96	0.20655	0.379585	0.789348
AT1G57680.1	1.428	0.268843	0.361959	0.680452
AT4G29610.1	1.91	0.259317	0.377901	0.708597
AT1G55340.2	1.631	0.349307	0.369261	0.574293
AT5G51300.1	1.795	0.273091	0.380564	0.689087
AT5G51300.3	1.769	0.270459	0.378343	0.690588
AT5G51300.2	1.752	0.274889	0.378048	0.683705
AT4G28030.1	1.396	0.332666	0.354823	0.578873
AT2G17820.1	1.799	0.256349	0.370509	0.705135
AT2G34750.1	1.757	0.295552	0.367101	0.643506
AT4G09320.1	1.348	0.311983	0.346367	0.593286
AT2G38290.1	1.552	0.271161	0.374925	0.687437
AT1G73250.1	1.672	0.229924	0.366666	0.739022
AT5G59160.2	1.604	0.228423	0.368999	0.747789
AT2G38290.2	1.618	0.254279	0.377027	0.714654
AT5G52560.1	2.241	0.224497	0.377798	0.75977
AT5G16220.1	1.695	0.279727	0.365062	0.662626
AT1G47340.1	2.394	0.195785	0.404727	0.820016
AT5G09410.1	2.094	0.240108	0.387314	0.744604
AT5G09410.2	2.088	0.245282	0.387233	0.736267
AT3G61415.2	1.813	0.227898	0.387083	0.761679
AT1G10650.1	2.083	0.211996	0.376352	0.779336
AT1G10650.2	2.127	0.199072	0.374311	0.798222
AT1G10840.2	1.564	0.256194	0.366233	0.701665
AT2G18300.1	1.752	0.316208	0.363279	0.610917
AT2G18300.3	1.724	0.295999	0.363745	0.641475
AT2G18300.2	1.74	0.328156	0.36332	0.595177
AT3G62900.1	2.166	0.226396	0.37346	0.753071
AT1G11720.1	2.277	0.275805	0.37197	0.67422
AT1G15420.1	1.753	0.296423	0.365523	0.635948
AT1G24340.1	2.527	0.227141	0.384078	0.758769
AT5G19090.1	1.863	0.30984	0.365988	0.621785
AT5G09820.1	1.693	0.226255	0.367963	0.747926
AT3G26420.1	2.347	0.224063	0.378732	0.759893
AT5G51440.1	1.388	0.319186	0.370822	0.618176
AT2G39360.1	2.1	0.23297	0.379489	0.74648
AT3G09970.1	1.823	0.250126	0.3678	0.712477
AT2G29450.1	1.413	0.374565	0.354363	0.527447
AT1G72010.1	1.708	0.250827	0.373131	0.716837
AT2G45540.1	2.581	0.220601	0.38586	0.770609
AT5G47710.1	1.638	0.261646	0.372217	0.699696
AT2G45540.2	2.617	0.215911	0.385211	0.777269
AT3G15390.2	1.608	0.270648	0.374839	0.688593
AT3G14075.1	2.164	0.218014	0.3884	0.775839
AT3G01910.2	1.661	0.334034	0.354893	0.571628
AT3G09630.2	1.606	0.345323	0.358869	0.565683
AT3G05727.1	1.64	0.24619	0.364421	0.715949
AT3G51910.1	1.787	0.231695	0.373415	0.747849
AT2G20130.1	1.996	0.244674	0.380999	0.733202
AT1G31920.1	2.143	0.24094	0.390824	0.745244
AT5G44430.1	1.522	0.206824	0.367897	0.78263
AT2G42320.1	2.265	0.264373	0.377091	0.697402
AT2G42320.2	2.329	0.257055	0.379357	0.710562
AT5G47710.2	1.614	0.241628	0.372993	0.733547
AT4G25740.2	1.511	0.274868	0.365002	0.672717
AT4G25740.1	1.448	0.309778	0.360132	0.616027
AT4G38350.1	1.977	0.241494	0.3743	0.729297
AT2G45560.2	1.649	0.255404	0.385618	0.722066
AT2G45560.1	1.838	0.239716	0.384481	0.742767
AT5G48030.1	2.157	0.288903	0.369317	0.652912
AT3G60590.2	1.523	0.308995	0.375098	0.633484
AT5G44572.1	1.537	0.277602	0.372249	0.67862
AT5G66510.2	1.632	0.268358	0.371889	0.69056
AT4G09730.1	1.759	0.336698	0.355871	0.570393
AT3G21630.1	1.67	0.274825	0.370585	0.675304
AT5G66510.1	1.63	0.286386	0.372462	0.663742
AT2G15570.1	1.62	0.258058	0.36869	0.702745
AT1G54170.1	1.757	0.235963	0.369771	0.733013
AT2G15570.2	1.652	0.252783	0.370039	0.712394
AT4G00620.1	1.895	0.248785	0.386252	0.729992
AT2G35260.1	1.648	0.338652	0.369524	0.588299
AT3G02900.2	1.565	0.291573	0.363378	0.646722
AT4G39710.1	1.777	0.312991	0.373067	0.624588
AT4G34230.1	1.566	0.316005	0.370714	0.620363
AT4G39710.2	1.787	0.299664	0.373129	0.64125
AT1G29470.2	1.597	0.363465	0.35014	0.530811
AT1G26260.2	1.814	0.219653	0.370166	0.761892
AT1G25275.3	1.71	0.307596	0.385193	0.645578
AT1G25275.2	1.547	0.34522	0.355381	0.557529
AT1G25275.1	1.672	0.361908	0.373642	0.559183
AT1G53430.2	1.735	0.265295	0.366823	0.689086
AT3G09050.1	1.986	0.275457	0.379401	0.683251
AT3G15640.2	1.927	0.277105	0.377022	0.681281
AT3G15640.1	1.926	0.280006	0.374814	0.674772
AT3G22190.2	1.523	0.30256	0.369064	0.638628
AT1G01040.2	2.437	0.242861	0.376449	0.727958
AT5G14030.4	1.494	0.261607	0.356501	0.683502
AT2G46170.2	2.025	0.211039	0.379587	0.780915
AT5G14030.1	1.474	0.285541	0.352006	0.638683
AT5G14030.2	1.487	0.260633	0.355672	0.684055
AT5G14030.3	1.493	0.260088	0.355645	0.684851
AT4G36920.2	2.16	0.233242	0.379954	0.747362
AT4G36920.1	2.091	0.246552	0.379623	0.724639
AT5G14050.1	2.038	0.283227	0.374433	0.665935
AT1G60550.1	1.663	0.288892	0.373063	0.660554
AT1G69640.1	1.804	0.278381	0.367282	0.6685
AT1G53350.1	2.213	0.210607	0.378692	0.780184
AT3G12990.3	1.742	0.267462	0.372632	0.688717
AT3G12990.2	1.746	0.267628	0.373266	0.688949
AT5G57490.1	1.617	0.286493	0.359663	0.646296
AT5G53050.3	1.849	0.264711	0.376449	0.698735
AT3G13870.2	2.016	0.314087	0.367126	0.615882
AT3G13870.1	1.963	0.319527	0.36284	0.602854
AT1G53165.2	1.962	0.239909	0.372563	0.730223
AT1G53165.3	1.926	0.236065	0.37061	0.73525
AT1G53165.1	1.924	0.246438	0.372366	0.720414
AT2G27210.1	1.882	0.233099	0.375979	0.74555
AT4G34730.1	1.677	0.287826	0.373182	0.658342
AT2G47070.1	1.67	0.27542	0.372011	0.679062
AT2G27210.2	1.925	0.220073	0.376111	0.766393
AT2G30930.1	1.721	0.341293	0.363414	0.5714
AT4G03410.1	2.348	0.175638	0.377724	0.835643
AT3G14595.1	1.504	0.233192	0.362203	0.734108
AT3G08530.1	2.124	0.303242	0.371335	0.634863
AT5G14970.1	1.627	0.335242	0.366784	0.588835
AT2G41160.1	1.947	0.234239	0.399722	0.763771
AT5G15810.1	1.736	0.252568	0.372168	0.712375
AT5G56340.1	1.891	0.271858	0.368323	0.679172
AT1G21200.1	1.744	0.233139	0.374993	0.745129
AT2G27950.1	1.666	0.27342	0.373553	0.683201
AT5G45700.1	1.673	0.224055	0.37304	0.757345
AT5G01390.2	1.999	0.231488	0.383982	0.755243
AT2G36620.1	1.452	0.367156	0.356165	0.536772
AT3G06350.1	1.575	0.26947	0.373521	0.689445
AT2G35620.1	2.331	0.242419	0.378044	0.732279
AT3G61030.1	5.601	0.148352	0.585371	0.941992
AT2G28840.1	1.529	0.334348	0.359422	0.579867
AT1G18590.1	2.205	0.233973	0.38671	0.755384
AT2G28840.2	1.623	0.328149	0.366463	0.596991
AT5G08139.1	1.401	0.250845	0.355803	0.699662
AT2G04790.3	1.889	0.230194	0.395831	0.765183
AT2G27970.1	1.955	0.223901	0.375893	0.758061
AT2G04790.1	1.766	0.209145	0.379823	0.785911
AT1G21750.2	2.103	0.298434	0.374395	0.644146
AT3G18230.1	2.025	0.245658	0.367797	0.717719
AT1G26090.1	2.002	0.216781	0.387877	0.780154
AT5G41520.1	1.652	0.360683	0.358206	0.538442
AT5G41520.2	1.649	0.360728	0.359375	0.540503
AT5G12200.1	1.819	0.282661	0.367183	0.662192
AT4G19170.1	1.758	0.229497	0.373719	0.750655
AT4G25280.1	2.03	0.28314	0.393276	0.686567
AT4G22690.1	1.678	0.321042	0.370976	0.61341
AT3G17800.2	1.769	0.265013	0.369203	0.69326
AT4G24090.1	1.429	0.356564	0.363203	0.560756
AT3G17800.1	1.76	0.274673	0.369843	0.679111
AT1G77670.1	1.949	0.283017	0.384395	0.675127
AT4G12900.1	1.727	0.260994	0.367313	0.69111
AT4G17310.2	1.992	0.191595	0.39398	0.819204
AT4G37650.1	1.848	0.204249	0.375285	0.790375
AT3G47680.1	1.806	0.26147	0.367632	0.694044
AT2G01570.1	1.889	0.26719	0.371953	0.687073
AT2G45960.2	1.754	0.313172	0.365503	0.61513
AT3G12170.1	1.899	0.265996	0.394032	0.712775
AT3G49730.1	1.828	0.277778	0.373257	0.675762
AT1G20780.1	2.155	0.255742	0.369824	0.701818
AT2G45960.1	1.695	0.341558	0.360654	0.571852
AT1G09010.1	1.783	0.28095	0.370266	0.667854
AT3G06740.1	1.579	0.263732	0.361629	0.685602
AT5G05860.1	1.757	0.26339	0.370834	0.692924
AT3G15260.2	2.167	0.287043	0.374534	0.658278
AT2G46680.2	1.851	0.24637	0.376631	0.722544
AT3G43980.1	1.844	0.30321	0.369008	0.627071
AT3G60410.3	1.998	0.235918	0.368948	0.732799
AT3G60410.2	2.063	0.226255	0.371161	0.750166
AT2G17840.1	2.164	0.327282	0.362574	0.590909
AT5G44635.1	2.035	0.225114	0.382731	0.760883
AT1G73440.1	1.858	0.224044	0.376317	0.759787
AT5G07440.1	1.605	0.282121	0.357612	0.653614
AT4G14040.1	1.536	0.287486	0.365012	0.654905
AT5G07440.3	1.449	0.249107	0.360464	0.70728
AT5G07440.2	1.586	0.290268	0.358102	0.642449
AT3G18680.1	1.537	0.31812	0.360247	0.604764
AT1G64490.1	1.582	0.241502	0.367819	0.725966
AT1G52320.3	1.991	0.241536	0.385559	0.743081
AT1G03410.1	2.015	0.217277	0.377594	0.771223
AT5G63880.1	1.63	0.312969	0.36563	0.615277
AT3G08510.1	1.786	0.344176	0.358359	0.564019
AT1G68300.1	1.503	0.298412	0.367453	0.641043
AT1G70520.1	1.58	0.307223	0.371648	0.632558
AT5G64070.1	2.146	0.264718	0.370502	0.688259
AT1G04240.1	1.91	0.311015	0.368397	0.621074
AT1G01510.1	1.738	0.266007	0.369125	0.686242
AT3G08510.3	1.829	0.321843	0.359441	0.594469
AT5G19530.1	1.72	0.305241	0.372408	0.638228
AT2G34560.2	1.451	0.270668	0.359493	0.673524
AT2G34560.1	1.432	0.273771	0.358005	0.667149
AT1G17210.1	2.108	0.251182	0.374227	0.713271
AT2G32710.2	1.807	0.214756	0.365234	0.764859
AT3G28160.1	1.981	0.229043	0.374995	0.749531
AT2G32710.1	1.814	0.218419	0.366272	0.760161
AT5G06910.1	1.65	0.32601	0.365728	0.599447
AT1G12430.1	2.111	0.26716	0.379807	0.698556
AT4G29430.1	1.586	0.268748	0.366709	0.6818
AT1G24793.1	1.565	0.27806	0.362473	0.661817
AT1G24793.2	1.683	0.27632	0.367801	0.669409
AT5G44450.1	1.573	0.25791	0.367501	0.701954
AT5G44190.1	1.549	0.279117	0.369983	0.672354
AT2G32730.1	1.936	0.294336	0.367638	0.645779
AT1G11360.2	1.928	0.276794	0.372729	0.671662
AT4G23570.2	1.418	0.294504	0.360958	0.640986
AT4G23570.3	1.445	0.287587	0.360083	0.650008
AT2G31810.2	1.899	0.332523	0.354329	0.575511
AT4G23570.1	1.421	0.289915	0.361443	0.648368
AT5G17020.2	2.241	0.244883	0.38055	0.72982
AT5G17020.1	2.242	0.245558	0.380629	0.729055
AT5G57880.1	2.062	0.172433	0.392373	0.850572
AT4G26270.1	1.671	0.250335	0.373628	0.718717
AT4G15450.1	1.849	0.267612	0.371471	0.691029
AT1G48600.1	1.779	0.353317	0.360101	0.558471
AT3G07360.2	1.541	0.298765	0.368668	0.64385
AT3G07360.3	1.51	0.302829	0.367001	0.635938
AT3G07360.1	1.549	0.303192	0.367956	0.636678
AT3G21200.1	1.784	0.318201	0.369345	0.613011
AT1G67325.2	2.073	0.224873	0.368949	0.753979
AT1G67325.1	1.977	0.276418	0.375287	0.680228
AT2G27330.1	1.467	0.242392	0.367965	0.723272
AT1G73110.1	1.756	0.300489	0.367658	0.638182
AT5G49760.1	1.613	0.284439	0.370424	0.664618
AT4G25360.1	2.318	0.221452	0.395157	0.776516
AT4G25360.2	2.318	0.216548	0.393652	0.783154
AT1G71860.2	2.04	0.268611	0.372344	0.686163
AT1G71860.3	2.015	0.251738	0.370046	0.710312
AT1G71860.1	2.008	0.274355	0.371833	0.677872
AT3G06868.1	1.698	0.238376	0.366806	0.729861
AT4G00300.2	1.679	0.278259	0.367708	0.666481
AT1G61450.1	1.574	0.273904	0.375041	0.684478
AT3G47000.1	1.845	0.283625	0.368147	0.658695
AT3G63190.1	1.59	0.37834	0.365081	0.534912
AT2G46690.1	1.484	0.252233	0.374453	0.719141
AT2G39990.1	1.506	0.270212	0.365434	0.681575
AT3G54670.3	1.875	0.287335	0.366533	0.652857
AT1G10820.2	1.664	0.234757	0.365078	0.733236
AT1G10820.1	1.672	0.222554	0.363801	0.752211
AT4G18810.2	1.644	0.26797	0.365566	0.682732
AT5G39830.1	1.622	0.284033	0.363978	0.656561
AT3G04160.2	2.158	0.21086	0.382339	0.782079
AT5G39830.2	1.622	0.273261	0.362434	0.670777
AT4G32260.1	1.653	0.319176	0.357774	0.599642
AT1G59900.1	1.493	0.315853	0.350869	0.591915
AT2G43235.1	1.743	0.24649	0.370811	0.721128
AT5G44320.1	1.795	0.269428	0.370641	0.685095
AT5G47890.1	1.414	0.356909	0.364857	0.560313
AT1G63980.2	1.924	0.325377	0.355137	0.587274
AT2G34357.1	2.416	0.246816	0.377019	0.722944
AT3G01090.3	1.785	0.244876	0.368511	0.716888
AT5G46110.1	1.619	0.315923	0.362737	0.610784
AT4G32720.1	1.593	0.321191	0.357426	0.597344
AT4G23820.1	1.579	0.358909	0.357625	0.54648
AT2G47980.1	2.057	0.249313	0.369593	0.713134
AT4G32720.2	1.617	0.307828	0.359818	0.619471
AT3G49645.1	2.225	0.247442	0.384969	0.727309
AT3G56990.1	1.968	0.281388	0.37587	0.669339
AT5G62200.1	1.547	0.261513	0.370173	0.697324
AT4G01560.1	1.66	0.27112	0.371099	0.682998
AT3G57870.1	1.721	0.284188	0.366385	0.652712
AT5G25780.1	1.848	0.289148	0.372513	0.656478
AT1G54060.1	1.468	0.290366	0.373074	0.660554
AT3G55270.1	2.217	0.242559	0.378239	0.732205
AT3G62010.1	1.575	0.283494	0.366295	0.660102
AT1G53890.3	2	0.195132	0.385045	0.813905
AT1G56045.1	1.962	0.330696	0.389892	0.620039
AT1G53890.2	1.932	0.219595	0.37931	0.770478
AT4G26710.1	1.607	0.286801	0.360827	0.64479
AT5G15870.1	1.925	0.232324	0.375908	0.747661
AT4G26710.2	1.699	0.287788	0.364389	0.643023
AT5G55160.1	1.582	0.309719	0.349685	0.601858
AT5G47830.2	1.631	0.238253	0.373229	0.734905
AT5G55160.2	1.669	0.280834	0.361764	0.659201
AT1G62430.1	2.103	0.224976	0.384466	0.764077
AT2G02930.1	1.837	0.195382	0.373747	0.801748
AT1G30260.1	2.274	0.282169	0.382897	0.674138
AT4G27230.1	1.59	0.311829	0.364187	0.617769
AT4G27230.2	1.44	0.288168	0.367799	0.65816
AT5G16290.1	1.746	0.290896	0.374465	0.658895
AT4G34370.1	1.972	0.260877	0.385687	0.711043
AT5G53340.2	2.171	0.270835	0.380204	0.690125
AT1G64142.1	1.734	0.290434	0.362238	0.643405
AT4G34370.2	1.989	0.251578	0.385898	0.725466
AT1G51980.2	1.575	0.289625	0.361191	0.64584
AT3G05560.3	1.448	0.260978	0.356035	0.68183
AT5G18230.2	1.828	0.290028	0.362711	0.64464
AT5G18230.1	1.826	0.290816	0.362971	0.643709
AT1G55690.3	1.78	0.25655	0.373958	0.706399
AT5G64940.2	1.671	0.293495	0.373859	0.654899
AT5G64940.1	1.664	0.295492	0.372963	0.650963
AT2G27385.2	1.722	0.254779	0.374753	0.715948
AT2G27385.3	1.722	0.254752	0.374433	0.715585
AT2G27385.1	1.829	0.367107	0.366624	0.547244
AT4G28440.1	1.355	0.273691	0.362829	0.67493
AT1G26880.1	1.639	0.34424	0.377001	0.590132
AT1G26880.2	1.763	0.306404	0.38704	0.652404
AT5G45100.1	2.004	0.28415	0.382465	0.677442
AT3G56480.1	1.759	0.281424	0.363403	0.65988
AT1G78630.1	1.736	0.386192	0.35911	0.515807
AT1G65845.1	1.664	0.275525	0.361756	0.667155
AT5G21170.1	1.748	0.321173	0.368942	0.610251
AT5G53800.1	1.511	0.365987	0.350111	0.52963
AT4G00740.1	1.944	0.239983	0.368293	0.726887
AT4G30160.1	1.997	0.243481	0.375165	0.729694
AT2G44530.2	1.616	0.303866	0.366807	0.631689
AT2G44530.1	1.599	0.302921	0.36587	0.632264
AT5G40670.1	1.637	0.278542	0.365073	0.665977
AT2G42160.1	1.582	0.254917	0.371944	0.7086
AT1G05850.1	1.581	0.392074	0.351225	0.500522
AT3G47670.1	2.1	0.237347	0.390592	0.746449
AT5G53340.1	2.164	0.265265	0.37993	0.697518
AT2G20630.2	1.537	0.276935	0.36354	0.669973
AT5G28330.1	2.698	0.171619	0.409558	0.860493
AT2G20630.1	1.454	0.354235	0.354641	0.552042
AT2G21160.1	1.561	0.290646	0.366846	0.651336
AT2G21160.2	1.608	0.275469	0.365717	0.671917
AT2G25520.1	1.862	0.279432	0.375424	0.670007
AT1G32240.1	1.868	0.222058	0.378669	0.763702
AT5G04740.2	1.771	0.24243	0.366821	0.723831
AT5G04740.1	1.753	0.28807	0.365253	0.651954
AT3G06580.1	1.678	0.29379	0.368639	0.6474
AT3G10350.1	1.874	0.250033	0.368711	0.714977
AT1G21770.1	1.422	0.249193	0.353492	0.696209
AT1G64670.1	1.743	0.24961	0.383049	0.729216
AT1G31070.2	1.912	0.264907	0.377929	0.698965
AT5G61020.2	1.752	0.349652	0.363057	0.565557
AT5G45060.1	2.207	0.228379	0.383589	0.756679
AT1G77810.1	1.886	0.21727	0.365093	0.760628
AT3G11710.1	1.649	0.331542	0.355451	0.577791
AT1G77810.2	1.825	0.243382	0.370037	0.72468
AT5G42070.1	1.616	0.283499	0.368766	0.661047
AT3G50550.1	1.57	0.273044	0.36192	0.666463
AT3G11770.1	1.906	0.244849	0.389543	0.737574
AT1G64650.2	2.581	0.243238	0.384232	0.736402
AT1G59980.1	2.545	0.196819	0.3854	0.806453
AT1G03630.1	1.485	0.354009	0.350937	0.546468
AT3G03870.2	1.822	0.227879	0.376162	0.752652
AT3G03870.1	1.776	0.240775	0.38154	0.738296
AT5G66140.1	1.609	0.262258	0.375698	0.70458
AT2G17230.1	1.73	0.303513	0.370065	0.631818
AT3G53668.1	1.579	0.250334	0.363762	0.708442
AT4G21090.3	1.716	0.247582	0.365255	0.713417
AT4G21090.2	1.716	0.24658	0.363017	0.712027
AT4G21090.1	1.716	0.246835	0.364207	0.713331
AT4G27840.1	1.88	0.20368	0.367138	0.785034
AT2G28940.1	1.643	0.262013	0.377776	0.704876
AT2G28940.2	1.638	0.266967	0.380714	0.70042
AT3G53740.3	1.574	0.401061	0.364871	0.505611
AT5G64460.8	1.84	0.308102	0.367578	0.625039
AT5G35590.1	1.414	0.310257	0.363589	0.622155
AT4G11010.1	1.542	0.313522	0.348762	0.591084
AT3G54690.1	1.742	0.254848	0.383413	0.720795
AT1G29530.1	1.968	0.258171	0.376311	0.706391
AT5G48760.1	1.61	0.3241	0.371925	0.608168
AT3G04020.1	1.671	0.273642	0.378778	0.685309
AT5G48760.2	1.618	0.317404	0.371688	0.616978
AT4G31010.2	1.831	0.23728	0.370368	0.733442
AT4G31010.1	1.718	0.25788	0.370185	0.701365
AT2G44525.1	1.611	0.251064	0.371381	0.712838
AT1G74850.1	1.782	0.307103	0.36505	0.622968
AT3G53740.2	1.575	0.388259	0.365168	0.52217
AT3G51640.2	1.721	0.253038	0.377117	0.716037
AT5G47180.1	1.417	0.266146	0.354854	0.673086
AT5G47180.2	1.438	0.277687	0.356264	0.655983
AT3G51640.1	1.723	0.26311	0.373866	0.697984
AT2G02360.1	1.694	0.278486	0.367415	0.666505
AT5G50580.1	1.761	0.267535	0.366496	0.684898
AT5G50580.2	1.696	0.270034	0.35916	0.672255
AT5G38895.1	2.061	0.196851	0.379402	0.800347
AT5G20840.1	2.086	0.239949	0.382582	0.739423
AT1G22400.1	1.675	0.313246	0.361078	0.611361
AT1G20020.2	1.925	0.395704	0.360218	0.505082
AT5G61820.1	1.907	0.259084	0.380865	0.707646
AT3G50550.2	1.573	0.241596	0.3783	0.734063
AT4G39970.1	1.501	0.259514	0.360267	0.690327
AT5G13560.1	1.7	0.246233	0.367057	0.72086
AT1G20020.3	1.936	0.419024	0.353045	0.471627
AT5G05360.2	1.601	0.251174	0.376088	0.720177
AT3G59990.3	1.65	0.288376	0.371552	0.659286
AT5G05360.1	1.519	0.270869	0.370287	0.683661
AT5G10980.1	1.377	0.293195	0.354235	0.634102
AT4G28100.1	1.604	0.258685	0.368087	0.697681
AT2G23290.1	1.771	0.369778	0.366337	0.541359
AT1G56610.2	2.608	0.193532	0.395455	0.817443
AT4G03260.1	1.857	0.254627	0.371854	0.709405
AT3G44340.1	2.425	0.248032	0.371941	0.716956
AT3G03250.1	1.944	0.282634	0.367127	0.659839
AT2G21650.1	1.578	0.238681	0.359236	0.720061
AT3G44340.2	2.536	0.243102	0.37851	0.730685
AT2G29530.2	1.871	0.337247	0.380163	0.600002
AT5G40610.1	1.549	0.269936	0.360626	0.671633
AT2G16280.1	1.905	0.311876	0.370122	0.621587
AT4G08980.3	1.573	0.26244	0.368637	0.694026
AT4G29070.1	2.086	0.286591	0.382227	0.669811
AT4G30190.1	1.769	0.305688	0.364894	0.626639
AT4G30190.2	1.775	0.299103	0.364187	0.635049
AT2G20230.1	2.188	0.264413	0.369426	0.685256
AT1G06510.1	1.977	0.264118	0.372925	0.692291
AT3G13480.1	1.505	0.309771	0.362459	0.618993
AT2G32520.1	1.54	0.295283	0.369188	0.647711
AT2G36160.1	1.339	0.3469	0.348152	0.551853
AT5G19450.1	1.848	0.294927	0.361475	0.63889
AT1G55980.1	1.968	0.239233	0.375816	0.735486
AT2G38650.2	1.874	0.26743	0.371114	0.686738
AT5G46730.1	1.403	0.363724	0.355065	0.540408
AT5G46730.2	1.389	0.348013	0.360139	0.566452
AT1G80030.1	1.754	0.305807	0.360704	0.615811
AT1G56510.1	2.242	0.243552	0.387545	0.737535
AT5G25560.4	1.781	0.246986	0.363841	0.710553
AT1G80030.2	1.802	0.294772	0.363176	0.633949
AT5G25560.2	1.532	0.259616	0.360251	0.690564
AT3G54810.1	1.65	0.290788	0.36915	0.652299
AT3G54810.2	1.986	0.313433	0.366828	0.615001
AT5G25560.1	1.533	0.258983	0.359747	0.69154
AT3G22630.1	1.758	0.284898	0.371703	0.66405
AT2G31360.1	1.624	0.310382	0.356316	0.610917
AT4G02430.2	1.833	0.238178	0.377955	0.738768
AT4G02430.1	1.8	0.2404	0.377976	0.735545
AT5G09250.2	1.559	0.229433	0.366833	0.747262
AT3G19930.1	1.791	0.249405	0.368197	0.713768
AT5G09250.1	1.553	0.267855	0.366799	0.685332
AT1G18840.1	1.824	0.221616	0.372958	0.76179
AT1G20950.1	1.981	0.277763	0.380537	0.680766
AT2G32090.2	1.806	0.230082	0.376222	0.750848
AT1G18840.2	1.804	0.220719	0.37078	0.761288
AT1G78660.3	1.7	0.242383	0.37219	0.726748
AT1G78660.2	1.666	0.237997	0.369614	0.731654
AT1G78660.1	1.674	0.249701	0.37085	0.713577
AT1G78610.1	1.884	0.244804	0.375873	0.727517
AT1G56700.1	1.92	0.221444	0.373277	0.763315
AT1G56700.2	1.873	0.217109	0.369531	0.766828
AT1G56700.3	1.971	0.201783	0.37174	0.79308
AT2G36420.1	1.563	0.331386	0.361669	0.587639
AT3G22310.1	1.713	0.287606	0.367325	0.654301
AT4G08980.5	1.435	0.295112	0.362024	0.637208
AT5G39040.1	1.604	0.255954	0.369078	0.702086
AT1G74740.1	1.876	0.249421	0.377985	0.720374
AT4G11211.1	2.592	0.223416	0.444883	0.801284
AT1G60000.2	1.465	0.240596	0.364224	0.727127
AT1G60000.1	1.638	0.292719	0.366696	0.648661
AT4G02820.1	1.886	0.240377	0.37359	0.732255
AT1G68660.2	1.555	0.251832	0.356991	0.697272
AT1G68660.1	1.55	0.276831	0.358217	0.659914
AT1G76780.1	1.602	0.340166	0.371184	0.587578
AT1G10900.1	2.122	0.239409	0.373751	0.732173
AT4G22190.1	1.745	0.286258	0.382848	0.673525
AT3G06700.2	1.574	0.354429	0.363801	0.555346
AT4G14410.2	1.74	0.273446	0.365825	0.675526
AT4G14410.1	1.807	0.243416	0.366175	0.722747
AT5G55300.1	1.83	0.312147	0.366035	0.616986
AT3G45140.1	1.82	0.359122	0.348147	0.532058
AT5G55300.3	1.835	0.300357	0.368173	0.635146
AT5G55300.2	1.882	0.304821	0.366239	0.627354
AT4G12880.2	1.506	0.236183	0.371172	0.738627
AT4G33865.1	1.67	0.343787	0.359281	0.562004
AT4G12880.1	1.448	0.281442	0.373511	0.673133
AT3G63170.1	1.732	0.258618	0.369803	0.700791
AT5G56150.2	1.548	0.258744	0.369259	0.702194
AT5G61530.1	1.483	0.296141	0.37032	0.648916
AT1G23052.1	2.121	0.237528	0.371249	0.731399
AT2G43550.1	1.454	0.306689	0.359216	0.619474
AT5G42940.1	2.193	0.257158	0.3795	0.710724
AT2G39650.1	1.743	0.22407	0.374671	0.75976
AT4G11410.1	1.911	0.238557	0.374041	0.733647
AT3G02750.1	2.133	0.22608	0.386851	0.762975
AT5G58440.1	2.073	0.306958	0.368756	0.626654
AT3G13740.2	1.576	0.277167	0.376759	0.683346
AT3G27560.1	1.89	0.209754	0.380831	0.787046
AT4G13020.4	1.831	0.237972	0.376407	0.73776
AT2G44900.1	1.965	0.220154	0.376354	0.766158
AT5G28450.1	1.525	0.260663	0.365468	0.695477
AT5G42950.1	1.764	0.260402	0.373853	0.701456
AT2G04030.2	1.8	0.363154	0.352346	0.530722
AT5G08760.1	1.71	0.318448	0.378145	0.620962
AT2G04030.1	1.795	0.366551	0.352054	0.527001
AT2G40950.1	1.475	0.231057	0.363335	0.737566
AT5G08180.2	1.56	0.260909	0.368324	0.698995
AT2G01720.1	1.763	0.297837	0.375219	0.650586
AT3G04120.1	1.768	0.304709	0.366455	0.629527
AT5G64760.1	2.092	0.233425	0.372645	0.741916
AT4G25640.2	2.051	0.257528	0.376665	0.709575
AT3G48070.2	1.634	0.24901	0.362229	0.707762
AT3G48070.1	1.672	0.25657	0.36289	0.695607
AT4G25640.1	2.053	0.275232	0.378227	0.684053
AT1G74800.1	2.375	0.23014	0.377956	0.749207
AT1G11400.2	1.447	0.304287	0.359642	0.624484
AT2G39725.2	1.982	0.224902	0.38761	0.767298
AT1G11400.1	1.451	0.302891	0.359395	0.625412
AT5G17710.1	1.855	0.337088	0.361092	0.572516
AT5G17710.2	1.841	0.33637	0.3576	0.568383
AT5G35790.1	1.88	0.316244	0.361705	0.606983
AT3G48090.1	1.901	0.303073	0.373598	0.638284
AT3G48090.2	1.894	0.295666	0.373307	0.648717
AT4G26860.2	1.845	0.266561	0.372203	0.690532
AT5G57685.1	1.88	0.273041	0.373832	0.681111
AT4G10320.1	1.832	0.276791	0.366669	0.669098
AT5G10690.1	1.632	0.276643	0.362487	0.665211
AT5G17770.1	1.448	0.28928	0.367979	0.655072
AT1G43890.3	1.649	0.257376	0.370766	0.701793
AT5G54970.1	1.535	0.230982	0.372042	0.747182
AT5G61530.2	1.488	0.289961	0.369548	0.656582
AT2G17550.1	2.079	0.25105	0.371232	0.712237
AT1G17510.1	1.488	0.245567	0.374234	0.726454
AT5G36250.1	1.848	0.237656	0.373457	0.737453
[truncated: 14,701 more rows]

## Sheet: R2
R2 Shoot Salt Whole Transcript Derived Reactivity Statistics
transcript	Shoot_Salt_Max	Shoot_Salt_Average	Shoot_Salt_SD	Shoot_Salt_Gini
AT2G14880.1	1.663	0.287195	0.369593	0.659681
AT3G19760.1	1.823	0.304808	0.360894	0.622912
AT1G62780.1	1.445	0.353178	0.361671	0.562315
AT2G12280.1	1.746	0.18237	0.36683	0.818745
AT1G68050.1	1.764	0.271439	0.375433	0.687686
AT2G22190.1	1.686	0.250401	0.378863	0.72188
AT5G62000.3	1.597	0.324902	0.36172	0.598117
AT1G08650.2	1.587	0.255205	0.359585	0.698734
AT3G11130.1	1.87	0.289077	0.367335	0.652193
AT3G09860.1	1.603	0.336127	0.356489	0.573506
AT1G04440.1	1.971	0.254558	0.379943	0.716552
AT5G13090.1	2.438	0.188209	0.384456	0.819433
AT4G30810.1	1.668	0.26588	0.371185	0.69224
AT4G32560.1	1.747	0.278276	0.381465	0.685548
AT5G19860.1	1.653	0.257536	0.364753	0.69582
AT3G10680.1	1.397	0.288445	0.362437	0.650177
AT3G60530.1	1.658	0.267983	0.361573	0.677667
AT1G31730.1	1.932	0.275049	0.366761	0.672514
AT5G19540.1	1.69	0.305688	0.372553	0.637087
AT2G37870.1	1.716	0.258255	0.380506	0.71373
AT1G11750.1	1.715	0.319606	0.37608	0.622115
AT3G11500.1	1.42	0.27985	0.364871	0.666467
AT5G52780.1	1.447	0.312747	0.36396	0.617461
AT5G50020.2	1.784	0.282142	0.380869	0.679031
AT1G05170.2	2.134	0.220449	0.370418	0.761137
AT1G05170.1	2.155	0.220554	0.371722	0.762247
AT1G18490.1	1.933	0.194698	0.367501	0.799462
AT5G19550.1	1.708	0.273475	0.367035	0.67533
AT3G19930.1	1.89	0.237994	0.36764	0.729555
AT4G23740.1	2.213	0.247032	0.37746	0.722262
AT1G67750.1	1.903	0.239097	0.372035	0.731332
AT3G23900.1	2.013	0.258745	0.367887	0.696827
AT1G73940.1	1.647	0.270218	0.379047	0.696396
AT5G47540.1	1.916	0.267897	0.380198	0.696484
AT2G02370.2	2.184	0.186482	0.392986	0.828844
AT2G02370.1	2.201	0.185655	0.390747	0.827995
AT1G55530.1	1.564	0.255493	0.365174	0.701555
AT2G43210.1	2.098	0.278504	0.378725	0.679045
AT5G54165.1	1.644	0.196784	0.36839	0.792913
AT1G52720.1	1.76	0.232888	0.37187	0.746131
AT3G09720.1	2.311	0.220219	0.385326	0.771179
AT1G56000.1	1.651	0.256643	0.376591	0.711226
AT5G22070.1	1.877	0.234662	0.382636	0.748966
AT1G17080.1	1.711	0.301341	0.370466	0.63805
AT1G74670.1	1.554	0.280166	0.367137	0.668818
AT4G23760.1	1.78	0.232953	0.36809	0.736848
AT3G59940.1	1.7	0.323357	0.361948	0.599088
AT5G61412.1	1.468	0.265032	0.357851	0.678675
AT1G24490.2	1.705	0.270331	0.367548	0.680529
AT5G08120.1	1.876	0.27095	0.368721	0.679898
AT3G49670.1	2.124	0.219636	0.381933	0.769774
AT3G54110.1	1.465	0.286149	0.364061	0.655901
AT4G24760.1	1.621	0.247814	0.357608	0.700722
AT1G22360.1	1.615	0.308483	0.374711	0.636518
AT3G48520.1	1.762	0.229325	0.369896	0.748522
AT1G22360.2	1.623	0.294735	0.372953	0.653493
AT4G37190.1	2.116	0.230033	0.382658	0.755396
AT5G22050.2	1.847	0.229425	0.377085	0.753036
AT5G22050.1	1.84	0.21502	0.376659	0.776124
AT4G37190.2	2.071	0.231166	0.380348	0.751619
AT1G68920.3	1.985	0.217104	0.380762	0.77464
AT3G54130.1	1.621	0.21758	0.357119	0.753925
AT5G49460.1	1.725	0.221716	0.376932	0.765455
AT5G47070.1	1.593	0.27524	0.372119	0.679904
AT3G47965.1	1.833	0.238996	0.371516	0.727863
AT3G13120.1	1.734	0.35469	0.360457	0.556816
AT2G26190.1	1.831	0.283843	0.365644	0.658302
AT4G32330.3	1.489	0.340096	0.363422	0.580369
AT1G74920.2	1.758	0.317382	0.363586	0.607667
AT4G32330.1	1.511	0.312937	0.365494	0.620027
AT4G24275.1	1.421	0.262388	0.359404	0.683369
AT1G75800.1	1.799	0.318823	0.367312	0.613545
AT3G55360.1	1.469	0.267383	0.366411	0.684862
AT4G14230.1	1.59	0.293234	0.367052	0.648463
AT3G26115.1	2.333	0.180941	0.375479	0.825347
AT2G03680.1	2.094	0.30674	0.367127	0.623519
AT1G44780.1	1.734	0.304999	0.368318	0.63095
AT2G20020.1	1.653	0.307433	0.36272	0.623695
AT5G15700.2	1.972	0.2322	0.37592	0.748414
AT1G33060.2	2.037	0.199679	0.376375	0.79876
AT1G07200.2	2.535	0.224398	0.386087	0.764729
AT2G18050.1	1.538	0.33358	0.36671	0.591893
AT2G18050.2	1.5	0.328043	0.364967	0.597671
AT1G75750.1	1.717	0.318913	0.374053	0.619999
AT1G75750.2	1.74	0.297089	0.371852	0.648185
AT3G22150.1	2.146	0.247507	0.378556	0.723847
AT4G17530.1	1.533	0.285296	0.362282	0.654753
AT2G01590.1	1.711	0.264014	0.37358	0.695696
AT1G79245.1	1.718	0.258971	0.373298	0.704602
AT1G66660.2	2.4	0.247081	0.384401	0.727281
AT1G75730.2	1.859	0.208322	0.370312	0.780325
AT1G75730.1	1.938	0.197283	0.372791	0.799948
AT5G42150.1	1.499	0.252756	0.367659	0.708979
AT2G34200.1	1.402	0.293382	0.365263	0.647275
AT2G33120.2	1.701	0.260443	0.370358	0.701029
AT2G33120.3	1.841	0.234703	0.373133	0.741674
AT2G33120.1	1.713	0.277112	0.371506	0.676559
AT3G53270.3	1.95	0.202389	0.368516	0.787187
AT1G54210.1	2.019	0.237703	0.380042	0.737778
AT1G54210.2	1.95	0.20413	0.372298	0.788517
AT5G41970.1	1.657	0.275639	0.370127	0.676218
AT4G22240.1	1.603	0.302178	0.364553	0.631849
AT4G17560.1	1.441	0.324426	0.367827	0.606978
AT1G18150.2	2.124	0.22133	0.368586	0.757313
AT5G59000.1	1.577	0.221559	0.367745	0.760954
AT3G22970.2	2.17	0.234665	0.379186	0.744573
AT5G58510.1	2.174	0.222626	0.385947	0.767742
AT1G06850.2	1.85	0.199465	0.374841	0.795633
AT2G03550.1	1.844	0.284827	0.376465	0.665187
AT5G01650.1	1.588	0.281359	0.362702	0.659737
AT3G13120.2	1.746	0.326043	0.367093	0.602544
AT4G22250.1	1.578	0.260169	0.368524	0.696947
AT5G65960.1	1.656	0.309754	0.365574	0.621114
AT2G35840.3	1.855	0.248156	0.375482	0.723266
AT2G35840.2	1.708	0.31341	0.374271	0.627903
AT2G35840.1	1.686	0.323349	0.371174	0.610432
AT2G33810.1	2.327	0.234553	0.38674	0.752927
AT5G36290.1	1.849	0.249724	0.374812	0.715324
AT5G36290.2	1.815	0.242802	0.373822	0.725378
AT4G30260.1	1.666	0.282863	0.366161	0.660297
AT4G16180.2	1.988	0.268597	0.369161	0.686171
AT4G16180.1	1.53	0.202431	0.368977	0.791593
AT4G38740.1	2.054	0.343394	0.368305	0.577655
AT3G20410.1	1.426	0.298567	0.36282	0.63629
AT5G24080.1	1.89	0.268716	0.378448	0.691523
AT5G37510.1	1.606	0.293613	0.366001	0.645967
AT5G37510.2	1.608	0.292017	0.366915	0.649448
AT1G51110.1	1.969	0.290078	0.370648	0.656534
AT5G65940.2	1.608	0.294814	0.371154	0.651576
AT5G65940.3	1.594	0.285231	0.36601	0.658426
AT1G17680.1	1.957	0.238397	0.369956	0.731795
AT5G59410.1	1.621	0.224216	0.370116	0.753681
AT3G20780.1	2.04	0.252891	0.375872	0.716186
AT2G22860.1	1.608	0.225355	0.371374	0.753342
AT1G21160.1	1.779	0.266941	0.367331	0.684521
AT5G55960.1	2.31	0.237892	0.374577	0.737785
AT5G22875.1	1.915	0.246016	0.382934	0.729608
AT1G05150.1	1.897	0.251397	0.370988	0.712592
AT5G04440.1	1.588	0.268619	0.363679	0.679269
AT3G47060.1	1.801	0.272241	0.374291	0.685648
AT1G65440.1	1.804	0.342113	0.367753	0.580835
AT3G63500.1	1.959	0.298327	0.37332	0.646523
AT5G04420.2	2.032	0.250363	0.368525	0.712617
AT5G04420.3	2.103	0.234988	0.368333	0.736167
AT5G04420.1	2.055	0.241358	0.367147	0.725296
AT3G63500.2	1.945	0.302487	0.374057	0.641221
AT3G46000.1	1.513	0.27584	0.365915	0.672166
AT1G19310.1	2.797	0.236858	0.39392	0.751908
AT4G31990.3	1.526	0.316823	0.360155	0.604881
AT2G38980.1	2.562	0.153773	0.400328	0.881423
AT4G31990.1	1.478	0.314639	0.359957	0.608825
AT4G32400.1	1.825	0.263729	0.367354	0.689526
AT3G13460.1	1.808	0.321253	0.36674	0.608627
AT3G17120.1	1.737	0.232	0.36875	0.743848
AT4G01040.1	1.532	0.258321	0.368154	0.701793
AT4G24830.1	1.877	0.254199	0.372199	0.709824
AT3G13460.2	1.808	0.318314	0.366538	0.612374
AT5G42390.1	1.708	0.301	0.362028	0.629535
AT1G60260.1	1.713	0.257731	0.365749	0.697005
AT1G59840.2	1.824	0.233849	0.372366	0.742589
AT4G04470.1	1.934	0.266987	0.382719	0.701475
AT3G07790.1	1.822	0.288933	0.36383	0.647736
AT1G59840.1	1.705	0.25823	0.375508	0.708385
AT5G46680.1	1.791	0.202112	0.370383	0.790863
AT2G30770.1	1.572	0.260098	0.367308	0.693283
AT1G17455.2	2.341	0.179462	0.379227	0.829584
AT1G17455.1	2.203	0.200097	0.382749	0.800857
AT3G18960.1	1.735	0.232132	0.370288	0.742425
AT3G48200.1	1.807	0.267186	0.371097	0.690061
AT1G11260.1	1.652	0.313956	0.364766	0.615254
AT1G64750.2	1.729	0.32069	0.385074	0.628351
AT1G64750.3	1.878	0.245649	0.390586	0.741704
AT3G25530.1	1.55	0.32301	0.369998	0.611388
AT1G64750.1	1.678	0.362996	0.386164	0.575127
AT3G01480.1	1.711	0.331402	0.364398	0.592688
AT2G42190.1	2.082	0.354677	0.36612	0.560843
AT3G01480.2	1.759	0.307065	0.368009	0.630531
AT3G09440.1	1.588	0.307051	0.362683	0.623075
AT1G72370.1	1.491	0.37846	0.356673	0.522864
AT3G09440.2	1.581	0.313405	0.362186	0.613397
AT5G16680.1	1.815	0.273383	0.369295	0.677254
AT2G34300.2	2.099	0.291041	0.363419	0.643744
AT2G34300.1	2.123	0.290306	0.364244	0.645406
AT1G69840.7	1.49	0.246982	0.364947	0.71662
AT3G25150.1	1.766	0.291103	0.368088	0.651619
AT1G21580.1	2.459	0.240992	0.386175	0.738535
AT3G02790.1	1.465	0.272924	0.352005	0.657633
AT2G05440.7	1.66	0.319323	0.384563	0.634573
AT4G23220.1	2.268	0.243585	0.385965	0.737336
AT1G48650.1	2.081	0.262317	0.371687	0.695749
AT4G14920.1	2.314	0.246512	0.372949	0.720754
AT1G48650.2	2.193	0.259603	0.377637	0.705043
AT5G49510.1	1.887	0.24636	0.364786	0.712681
AT2G22450.1	1.8	0.315727	0.376042	0.626362
AT5G49510.2	1.888	0.218862	0.360764	0.752979
AT5G51750.1	1.832	0.269156	0.370997	0.685205
AT5G58100.1	2.211	0.248748	0.370291	0.712846
AT2G18960.1	1.64	0.346377	0.357757	0.565339
AT5G27520.1	1.801	0.254171	0.38395	0.723358
AT2G14520.1	2.317	0.196746	0.381631	0.804972
AT1G16260.2	1.832	0.234658	0.371056	0.738548
AT5G02500.1	1.735	0.34416	0.364165	0.573108
AT1G56460.2	1.844	0.301974	0.383568	0.653746
AT1G01770.1	1.953	0.223227	0.38191	0.764627
AT5G25100.1	1.657	0.264927	0.361015	0.682235
AT5G25100.2	1.693	0.25199	0.362264	0.70388
AT3G19360.1	1.712	0.201939	0.364945	0.786451
AT2G36060.1	1.57	0.244058	0.361899	0.714564
AT2G36060.2	1.557	0.239279	0.361696	0.722099
AT2G36060.3	1.597	0.242978	0.362512	0.716415
AT1G70810.1	1.702	0.293693	0.366598	0.645405
AT1G72170.1	1.478	0.256688	0.363739	0.694368
AT3G24530.1	1.777	0.257318	0.374718	0.704748
AT1G07930.1	1.477	0.367713	0.365941	0.550929
AT1G47250.1	1.752	0.318786	0.372674	0.619133
AT1G07930.2	1.538	0.350012	0.367407	0.574808
AT1G19140.1	1.846	0.23068	0.375074	0.74845
AT4G09030.1	1.96	0.268859	0.365968	0.676438
AT5G57200.1	7	0.192012	1.14199	0.972565
AT3G51370.2	1.614	0.271233	0.367846	0.680451
AT3G51370.1	1.614	0.286709	0.366996	0.65587
AT4G08850.2	1.954	0.26999	0.377898	0.691366
AT4G08850.1	1.925	0.283946	0.376498	0.669038
AT4G32010.1	1.948	0.218586	0.370122	0.762479
AT1G21630.2	2.353	0.261478	0.372211	0.697142
AT1G73030.1	1.62	0.312087	0.363934	0.617529
AT1G21630.1	2.332	0.273117	0.373894	0.681504
AT4G19060.1	1.899	0.294151	0.378026	0.654636
AT3G25840.2	1.59	0.313801	0.359503	0.609787
AT3G25840.1	1.588	0.318705	0.359566	0.603499
AT1G27030.1	2.125	0.256555	0.373669	0.702329
AT2G20950.3	1.961	0.282909	0.373151	0.669713
AT2G20950.2	1.95	0.282499	0.372198	0.668754
AT2G20950.1	1.901	0.295614	0.371718	0.649382
AT3G06450.2	2.256	0.247783	0.375186	0.719811
AT3G25150.2	1.817	0.269113	0.373312	0.691113
AT3G61220.1	1.982	0.243399	0.388195	0.741526
AT2G21060.1	1.34	0.342889	0.361314	0.575858
AT4G29130.1	2.074	0.237066	0.385458	0.748333
AT5G46920.1	2.468	0.203919	0.38453	0.794909
AT3G58270.1	2.227	0.228326	0.386488	0.760471
AT3G07730.1	1.487	0.252854	0.361322	0.702696
AT1G33700.2	2.244	0.173625	0.384451	0.842814
AT3G55500.1	1.574	0.257207	0.371299	0.703095
AT3G58270.2	2.219	0.231676	0.387831	0.756565
AT1G76160.1	1.859	0.337669	0.374314	0.594692
AT4G19520.1	2.508	0.208907	0.390144	0.792363
AT4G21190.1	1.709	0.313952	0.363997	0.612755
AT5G62900.1	1.599	0.28282	0.370674	0.667212
AT1G58030.1	1.973	0.251857	0.37276	0.712114
AT4G19990.1	1.812	0.225832	0.377499	0.756883
AT5G11990.1	1.521	0.227911	0.361852	0.738745
AT4G19990.2	1.768	0.224003	0.371395	0.754542
AT3G27100.1	1.567	0.235297	0.362181	0.731271
AT3G27100.2	1.693	0.204537	0.364893	0.782468
AT1G51450.1	1.567	0.245086	0.36974	0.722511
AT1G29470.1	1.54	0.355835	0.36314	0.561086
AT5G03420.1	1.601	0.277904	0.36938	0.673844
AT1G19880.1	1.735	0.283499	0.368582	0.663656
AT1G64500.1	1.884	0.29988	0.377968	0.647242
AT2G01060.1	1.676	0.281441	0.363699	0.657605
AT4G29870.1	1.721	0.226728	0.367489	0.747372
AT5G67570.1	1.745	0.278936	0.36925	0.670233
AT3G19510.1	1.771	0.249885	0.36887	0.712603
AT4G08110.1	1.956	0.196585	0.363516	0.79372
AT5G01390.4	2.064	0.217347	0.3887	0.778636
AT5G01390.3	2.026	0.20904	0.383334	0.786679
AT5G59180.1	1.954	0.234799	0.377492	0.74291
AT1G58684.1	1.985	0.350253	0.36864	0.571168
AT5G03905.1	1.495	0.241734	0.368287	0.725728
AT5G15610.2	1.553	0.27376	0.365273	0.675111
AT5G15610.1	1.552	0.256147	0.364223	0.700201
AT1G80950.1	1.639	0.274311	0.363976	0.671198
AT4G33565.1	1.946	0.23158	0.388063	0.753507
AT2G22970.1	2.05	0.207809	0.376178	0.782342
AT5G50110.1	1.591	0.243383	0.363845	0.720128
AT5G42950.1	2.002	0.254436	0.375585	0.710374
AT1G65320.1	2	0.23576	0.38306	0.745871
AT5G05410.1	1.477	0.341092	0.362709	0.579767
AT1G13170.2	1.944	0.240158	0.375321	0.73511
AT3G51430.1	1.939	0.280596	0.377316	0.67683
AT1G14010.1	1.743	0.317917	0.366062	0.610148
AT5G42780.1	1.819	0.258256	0.367522	0.699411
AT1G28580.2	1.707	0.223681	0.364756	0.750461
AT1G28580.1	1.618	0.24814	0.364747	0.712326
AT1G31800.1	1.578	0.290998	0.361573	0.645408
AT5G16110.1	1.719	0.240013	0.365427	0.725729
AT5G55990.1	1.736	0.283022	0.378531	0.676229
AT2G41250.1	1.615	0.225977	0.366731	0.748619
AT3G52220.1	1.479	0.335074	0.358656	0.582945
AT5G45100.2	1.734	0.241355	0.370777	0.729911
AT4G13200.1	1.638	0.283435	0.36231	0.652995
AT3G56120.1	1.874	0.211438	0.364081	0.768947
AT5G44020.1	1.782	0.31653	0.36627	0.613067
AT3G10350.2	1.805	0.261218	0.376997	0.70684
AT1G06360.1	1.536	0.295457	0.364522	0.642529
AT3G53560.1	1.687	0.296279	0.373387	0.648561
AT1G21650.1	1.721	0.258031	0.370643	0.702997
AT1G21650.2	1.713	0.26458	0.370194	0.691923
AT1G21650.3	1.861	0.24007	0.370596	0.729156
AT1G52980.1	1.713	0.334403	0.361169	0.584317
AT1G30330.1	1.995	0.24938	0.371851	0.717138
AT5G44000.1	1.993	0.242863	0.37814	0.733992
AT1G30330.2	1.989	0.246711	0.370418	0.719743
AT3G10330.1	1.649	0.243113	0.370332	0.726857
AT4G08500.1	1.85	0.246998	0.370805	0.717887
AT4G03260.2	1.579	0.267677	0.367335	0.686721
AT5G67320.1	1.751	0.338817	0.356698	0.571527
AT4G31180.1	2.288	0.27475	0.371985	0.676498
AT4G31180.2	2.291	0.267558	0.37136	0.686414
AT4G03200.2	2.05	0.255323	0.378365	0.716208
AT4G03200.1	1.917	0.276217	0.376881	0.683316
AT1G08880.1	1.645	0.291983	0.361918	0.644903
AT1G09580.1	1.471	0.214456	0.357042	0.75595
AT5G44240.2	1.937	0.227122	0.380004	0.758015
AT5G44240.1	1.944	0.220462	0.378879	0.767765
ATCG00250.1	1.025	0.248905	0.38007	0.726812
AT1G74260.1	1.724	0.272509	0.368607	0.680315
AT3G22590.1	1.657	0.298305	0.367659	0.641135
AT1G52500.1	2.339	0.210913	0.379768	0.777781
AT3G25717.1	1.603	0.285609	0.372754	0.665941
AT2G46030.1	2.002	0.232652	0.372153	0.739447
AT3G57080.1	1.792	0.227724	0.38238	0.758873
AT2G47110.1	1.74	0.3643	0.364542	0.548051
AT2G47110.2	1.555	0.357649	0.365895	0.559109
AT3G25190.1	2.151	0.2223	0.390597	0.771707
AT5G27150.1	1.974	0.25624	0.371223	0.704756
AT2G45010.1	1.556	0.251337	0.384882	0.727926
AT1G01790.1	1.86	0.25519	0.378146	0.712514
AT5G57120.1	1.82	0.350434	0.36323	0.563802
AT5G20520.1	1.982	0.255291	0.370692	0.70746
AT3G04310.1	1.638	0.264854	0.377419	0.697158
AT1G11910.1	1.503	0.345673	0.362846	0.571714
AT4G12310.1	1.811	0.241669	0.363251	0.722586
AT1G27970.2	1.684	0.232853	0.368207	0.74013
AT5G09230.5	2.2	0.250414	0.391522	0.729157
AT4G30020.1	2.083	0.240953	0.373211	0.731447
AT5G20500.1	1.444	0.318896	0.364257	0.611079
AT2G01190.1	1.915	0.276058	0.368542	0.671557
AT1G01780.1	1.562	0.219208	0.368944	0.762378
AT5G40800.1	1.582	0.238414	0.363273	0.724982
AT5G62050.1	1.998	0.24512	0.369596	0.720539
AT3G60130.1	1.694	0.267619	0.373205	0.692644
AT2G40750.1	1.652	0.232446	0.368584	0.74315
AT3G60130.3	1.782	0.257047	0.375126	0.709732
AT1G09830.1	1.967	0.244778	0.365376	0.716714
AT3G12120.2	1.725	0.333078	0.358543	0.581495
AT3G12550.1	1.94	0.231206	0.368779	0.741973
AT3G19640.1	1.944	0.267347	0.378606	0.693819
AT3G06480.1	2.371	0.236223	0.385938	0.745954
AT1G32460.1	1.465	0.230506	0.361686	0.737526
AT2G23070.1	1.636	0.262943	0.371627	0.69834
AT5G27290.2	1.678	0.234017	0.367673	0.740214
AT5G02800.1	1.919	0.227627	0.383046	0.761667
AT2G16930.1	1.392	0.266358	0.365734	0.6888
AT2G16930.2	1.382	0.29071	0.366188	0.652358
AT2G16930.3	1.382	0.269653	0.367212	0.686014
AT5G24314.2	1.724	0.280007	0.377019	0.679533
AT4G16141.1	1.825	0.315817	0.374537	0.623066
AT5G19930.2	2.278	0.159817	0.389824	0.866942
AT5G42770.1	1.634	0.285698	0.372856	0.665141
AT5G42770.2	1.703	0.253898	0.370213	0.708869
AT5G19930.1	2.263	0.155668	0.386821	0.871317
AT2G16950.2	2.07	0.23184	0.38156	0.752054
AT2G16950.1	2.114	0.226914	0.383044	0.760467
AT5G10060.1	1.988	0.242615	0.366945	0.720407
AT3G29160.1	1.924	0.243233	0.384373	0.735686
AT3G29160.2	1.898	0.248219	0.384123	0.727556
AT3G29160.3	1.846	0.247056	0.379289	0.72519
AT1G69935.1	1.635	0.258135	0.37713	0.71096
AT1G51270.2	1.88	0.237104	0.374049	0.736818
AT5G61770.3	1.717	0.260122	0.371405	0.700596
AT5G61770.2	1.695	0.265098	0.370604	0.692405
AT5G61770.1	1.671	0.250557	0.366799	0.711594
AT2G34925.1	1.329	0.223016	0.363256	0.755389
AT2G48121.1	1.835	0.16928	0.374022	0.839723
AT1G11680.1	1.899	0.254226	0.376507	0.714555
AT3G01610.1	2.476	0.236311	0.386289	0.748781
AT2G48121.2	1.507	0.214934	0.355003	0.754891
AT3G62650.1	1.626	0.285048	0.362298	0.654709
AT3G45900.1	1.489	0.220162	0.358799	0.752806
AT2G33630.1	2.035	0.258579	0.372863	0.698095
AT4G11100.2	1.77	0.29338	0.377528	0.658539
AT4G11100.1	1.729	0.316725	0.372667	0.619542
AT5G05730.1	1.659	0.297411	0.369242	0.643747
AT2G37400.1	1.912	0.283404	0.375384	0.66726
AT5G05730.2	1.7	0.288781	0.373087	0.660382
AT1G74920.1	1.732	0.331954	0.363509	0.588603
AT1G29880.1	1.773	0.314973	0.365701	0.614422
AT3G15670.1	1.761	0.213693	0.365187	0.767514
AT5G08560.2	1.769	0.243122	0.372926	0.728798
AT1G54610.1	1.802	0.294705	0.372788	0.651852
AT1G54610.2	1.818	0.279712	0.371945	0.672724
AT1G54610.3	1.813	0.282371	0.373443	0.670659
AT5G23630.1	1.852	0.24812	0.371846	0.717831
AT5G55580.1	1.95	0.221386	0.377967	0.763107
AT1G25560.1	1.507	0.271228	0.363358	0.676686
AT1G65840.1	2.117	0.214066	0.383629	0.780765
AT1G19740.1	1.63	0.289092	0.358485	0.638641
AT2G38000.1	2.159	0.275094	0.379997	0.683752
AT1G20816.1	1.567	0.241736	0.377122	0.735064
AT5G43760.1	1.791	0.322393	0.368161	0.607436
AT4G28740.1	1.96	0.285044	0.369913	0.662426
AT5G23405.2	1.587	0.270272	0.371703	0.688177
AT3G16140.1	1.551	0.378306	0.364602	0.533537
AT1G51610.1	1.758	0.220092	0.363158	0.755462
AT1G08370.1	1.588	0.241499	0.364853	0.724225
AT2G22490.1	1.784	0.254726	0.373198	0.711381
AT2G22490.2	1.804	0.251922	0.373544	0.715669
AT1G24020.1	1.768	0.288643	0.38301	0.671449
AT3G16720.1	1.538	0.204983	0.369774	0.78613
AT1G73710.1	2.317	0.199973	0.388036	0.803467
AT5G47435.1	1.691	0.265314	0.372942	0.69435
AT1G07135.1	1.383	0.372266	0.371501	0.55226
AT4G32070.1	1.647	0.305279	0.364766	0.626118
AT1G66100.1	1.403	0.277666	0.37339	0.680024
AT5G60640.1	1.631	0.310646	0.36416	0.617468
AT5G60640.2	1.67	0.298049	0.363894	0.63539
AT5G60640.3	1.652	0.300265	0.365907	0.633896
AT1G25211.1	1.775	0.27911	0.368267	0.668995
AT3G52420.1	1.484	0.274853	0.357928	0.662135
AT1G06780.2	2.272	0.225645	0.383702	0.763398
AT3G53500.2	1.664	0.278549	0.363247	0.66408
AT3G53500.1	1.696	0.274202	0.366463	0.673741
AT5G60620.1	1.665	0.283923	0.369225	0.663395
AT2G47850.1	1.943	0.217631	0.373921	0.768614
AT1G45249.1	1.755	0.324553	0.364469	0.601068
AT1G45249.2	1.764	0.29649	0.366722	0.643487
AT1G45249.3	1.782	0.309891	0.367558	0.624996
AT2G01100.1	1.407	0.366527	0.365842	0.551518
AT2G01100.3	1.466	0.332424	0.370637	0.600401
AT2G01100.2	1.39	0.379673	0.364103	0.533669
AT5G27860.1	1.585	0.273893	0.369045	0.67876
AT4G23885.1	1.564	0.221974	0.360407	0.749766
AT5G27860.2	1.628	0.260189	0.370763	0.702133
AT1G54310.1	1.649	0.247907	0.367387	0.714608
AT1G54770.1	1.569	0.269278	0.368476	0.685439
AT3G21610.2	2.274	0.210406	0.380151	0.783414
AT3G14350.2	1.594	0.256191	0.366837	0.703701
AT3G14350.1	1.572	0.272308	0.366476	0.678367
AT3G21610.1	2.262	0.219075	0.380386	0.769119
AT1G33600.1	1.869	0.252051	0.380407	0.720573
AT1G32160.1	1.746	0.250461	0.374848	0.71946
AT5G08760.1	1.865	0.317093	0.386413	0.628422
AT5G39740.2	2.061	0.344229	0.37318	0.584671
AT5G54860.1	2.351	0.214179	0.378715	0.775346
AT2G21260.1	1.995	0.159749	0.385313	0.865051
AT3G07430.1	1.832	0.309472	0.368375	0.625726
AT4G24510.1	1.717	0.276182	0.370913	0.678731
AT1G70090.1	2.005	0.254733	0.382309	0.716335
AT1G70090.2	2.07	0.218478	0.379208	0.769542
AT1G64572.1	1.58	0.287353	0.387297	0.680861
AT3G26910.2	2.203	0.22037	0.377147	0.767154
AT1G70430.1	2.387	0.168964	0.395693	0.855977
AT4G27040.1	1.77	0.266786	0.374931	0.692951
AT5G66520.1	1.979	0.217088	0.368692	0.763215
AT3G21810.1	1.673	0.27561	0.359317	0.663645
AT1G17650.1	1.509	0.285613	0.375231	0.669134
AT1G76405.2	1.606	0.252331	0.370392	0.710249
AT4G32605.1	1.994	0.256585	0.378446	0.710571
AT2G41500.1	2.181	0.232794	0.389668	0.753331
AT2G01830.3	2.037	0.26221	0.3717	0.696003
AT2G01830.2	1.983	0.266789	0.373113	0.688957
AT3G21430.2	2.633	0.23369	0.388711	0.751579
AT3G48820.1	1.608	0.259558	0.369689	0.701233
AT3G48820.2	1.604	0.261446	0.371325	0.700298
AT1G71850.1	1.793	0.2383	0.367322	0.72899
AT2G26900.1	1.63	0.313384	0.367918	0.620914
AT2G46535.1	1.695	0.261537	0.367348	0.694524
AT4G26670.1	1.863	0.217265	0.3658	0.762616
AT1G36050.2	1.687	0.302229	0.372375	0.641973
AT3G58500.1	1.677	0.307937	0.362381	0.617528
AT5G54720.1	1.89	0.221352	0.369804	0.75674
AT3G02870.1	1.767	0.226566	0.366524	0.74913
AT3G02870.3	1.765	0.213249	0.363371	0.76784
AT3G02870.2	1.707	0.215902	0.369407	0.76835
AT5G47110.1	1.374	0.331166	0.364581	0.595265
AT1G18250.1	2.211	0.231607	0.386163	0.75571
AT1G18250.2	2.295	0.216639	0.384173	0.776891
AT3G66652.1	2.619	0.238313	0.390699	0.748206
AT3G66652.2	2.622	0.237779	0.390631	0.74894
AT2G03710.2	2.017	0.271803	0.377996	0.689273
AT2G03710.3	2.126	0.251672	0.377659	0.717901
AT4G21540.3	1.656	0.29922	0.367442	0.640017
AT5G20000.1	1.598	0.293957	0.361007	0.639582
AT5G54310.1	2.107	0.298638	0.367576	0.639431
AT4G18060.1	2.271	0.257872	0.386418	0.71519
AT5G06750.3	1.903	0.201881	0.371947	0.790705
AT2G30150.1	1.587	0.275506	0.370523	0.676911
AT5G20140.2	1.638	0.261962	0.36668	0.693324
AT5G40970.1	1.762	0.16113	0.362757	0.851066
AT5G59250.1	1.601	0.251847	0.369571	0.71237
AT4G29480.1	1.667	0.322554	0.374847	0.617226
AT5G37830.1	2.003	0.279447	0.36916	0.668575
AT3G49601.1	1.683	0.397137	0.361139	0.507189
AT1G28340.1	1.689	0.239803	0.369333	0.731142
AT5G44800.1	1.953	0.231561	0.367907	0.739772
AT2G01021.1	1.569	0.174875	0.370079	0.812735
AT3G06190.1	1.731	0.277702	0.371395	0.67416
AT3G28210.1	1.563	0.209308	0.370182	0.779401
AT4G00730.2	1.714	0.236852	0.369608	0.733663
AT4G00730.1	1.696	0.247394	0.370993	0.7185
AT4G38260.1	1.983	0.253962	0.38618	0.723475
AT2G29580.1	1.906	0.243477	0.378436	0.733121
AT3G16810.1	1.728	0.252126	0.374194	0.716113
AT2G46220.1	1.55	0.316017	0.360799	0.607962
AT2G18700.1	1.865	0.262139	0.367066	0.693701
AT5G14120.1	1.718	0.277124	0.368262	0.67228
AT5G24630.5	1.986	0.223474	0.368205	0.753756
AT5G24630.4	1.972	0.22303	0.366081	0.752255
AT5G04480.2	1.894	0.261037	0.375009	0.703133
AT5G24630.6	1.988	0.213713	0.365618	0.767206
AT5G24630.1	2.008	0.221545	0.367867	0.756689
AT5G24630.3	1.971	0.221424	0.365518	0.754456
AT5G24630.2	1.738	0.218065	0.370356	0.764734
AT4G15560.1	1.771	0.309324	0.374887	0.636162
AT4G26240.1	1.635	0.215003	0.373462	0.77246
AT4G00750.1	1.627	0.304714	0.366535	0.631099
AT2G40660.1	1.492	0.29851	0.361256	0.634199
AT3G52155.1	1.894	0.264707	0.371476	0.694965
AT4G39350.1	1.748	0.276359	0.369451	0.672591
AT4G37760.1	2.325	0.237476	0.389432	0.748447
AT3G52390.1	1.694	0.271548	0.386768	0.69917
AT1G76360.1	1.757	0.257033	0.371029	0.704174
AT1G09160.2	1.596	0.21675	0.366197	0.76487
AT3G52390.2	1.72	0.265675	0.384922	0.706233
AT3G26744.4	1.876	0.238142	0.365686	0.728035
AT4G31310.1	1.499	0.276376	0.363066	0.668225
AT3G58040.1	1.759	0.267399	0.371126	0.68881
AT5G50720.1	1.691	0.239296	0.380498	0.739865
AT4G35750.1	1.772	0.273008	0.365761	0.673907
AT2G45910.1	1.937	0.253808	0.370215	0.709182
AT1G20110.1	1.926	0.257218	0.369784	0.701889
AT3G53900.2	1.645	0.255948	0.367457	0.703424
AT3G53900.1	1.637	0.245135	0.365974	0.71892
AT5G54300.1	1.881	0.266455	0.37654	0.695763
AT1G09590.1	1.56	0.347973	0.377216	0.588699
AT2G39000.1	1.743	0.228444	0.370239	0.746407
AT1G18030.2	1.974	0.239287	0.370507	0.730788
AT5G29000.4	1.935	0.193794	0.373653	0.80588
AT1G07985.1	2.196	0.206779	0.380326	0.789262
AT4G30950.1	1.51	0.328539	0.357061	0.587021
AT3G22142.1	1.829	0.288904	0.366029	0.649626
AT5G22770.2	1.943	0.269761	0.371996	0.685504
AT4G38040.1	1.622	0.240296	0.369417	0.72774
AT2G26500.2	1.51	0.342813	0.357775	0.566926
AT2G26500.3	1.648	0.335258	0.372849	0.594266
AT3G04880.1	1.872	0.284196	0.370248	0.66517
AT4G35080.1	1.647	0.220267	0.372727	0.763265
AT4G35080.3	1.704	0.20631	0.373512	0.785975
AT1G80460.2	1.711	0.284009	0.36764	0.662653
AT1G20770.1	1.52	0.293788	0.373968	0.657335
AT5G61020.1	1.663	0.332009	0.36908	0.596791
AT2G36145.1	1.526	0.361067	0.363693	0.550362
AT5G17070.1	1.487	0.306171	0.371229	0.635917
AT5G22770.1	1.906	0.285848	0.371781	0.66161
AT5G04870.1	1.72	0.284142	0.367752	0.660553
AT5G46430.2	1.559	0.345914	0.363968	0.572652
AT5G46430.1	1.566	0.350725	0.366062	0.569375
AT5G46250.2	1.519	0.283343	0.367027	0.662986
AT3G48420.1	1.707	0.316282	0.367406	0.615308
AT2G22170.1	1.834	0.241081	0.366314	0.723317
AT4G19120.1	1.613	0.302891	0.357711	0.622643
AT4G19120.2	1.621	0.305184	0.358418	0.620051
AT1G04635.1	1.808	0.19569	0.375862	0.799769
AT3G06670.2	1.904	0.257267	0.373892	0.708206
AT3G06670.1	1.856	0.272713	0.373605	0.683727
AT1G43670.1	1.649	0.344598	0.360657	0.569306
AT5G63905.1	1.681	0.284174	0.385532	0.677243
AT4G09650.1	1.884	0.331814	0.373761	0.59984
AT2G31600.2	1.998	0.185078	0.376709	0.820338
AT2G30320.1	1.661	0.296549	0.37241	0.647901
AT2G16280.1	1.89	0.283649	0.375018	0.665781
AT3G17712.3	2.355	0.219557	0.382083	0.766762
AT5G01530.1	2.051	0.370372	0.372816	0.554112
AT1G20960.1	1.772	0.300634	0.369368	0.640001
AT1G20960.2	1.773	0.299439	0.369716	0.642159
AT1G30460.1	2.249	0.2374	0.370625	0.736136
AT3G50670.1	1.422	0.337608	0.365525	0.587526
AT3G50670.2	1.64	0.280954	0.367595	0.66707
AT4G01330.1	1.682	0.25806	0.367127	0.698347
AT4G01330.2	1.725	0.243457	0.366739	0.721114
AT4G36420.1	1.673	0.321595	0.378172	0.622998
AT5G09220.1	1.771	0.248819	0.373273	0.721258
AT3G05410.2	1.641	0.262109	0.36764	0.697163
AT1G10060.2	1.728	0.223819	0.37192	0.759249
AT3G54050.2	1.421	0.355583	0.35789	0.554837
AT3G05410.1	2.031	0.209532	0.379563	0.78512
AT2G14460.1	1.378	0.275513	0.358786	0.664508
AT3G19990.1	1.906	0.28706	0.373153	0.65957
AT2G33570.1	2.334	0.240703	0.380926	0.736735
AT1G60995.1	1.761	0.251528	0.370364	0.712181
AT2G27100.1	1.707	0.26669	0.366692	0.685318
AT4G13220.1	1.538	0.259149	0.368226	0.698484
AT1G80840.1	1.719	0.272471	0.370668	0.683086
AT4G39330.2	1.786	0.321693	0.376288	0.61797
AT5G12350.1	1.871	0.243423	0.377728	0.731251
AT5G05450.1	1.947	0.280614	0.375491	0.674244
AT3G20860.1	1.772	0.236754	0.372876	0.736563
AT2G20760.1	1.814	0.33522	0.368739	0.59144
AT5G65430.1	1.557	0.274221	0.365108	0.674751
AT5G65430.2	1.563	0.268468	0.364929	0.684445
AT5G65430.3	1.62	0.241654	0.364033	0.725036
AT3G17780.1	1.863	0.324124	0.371556	0.604711
AT3G10500.1	2.199	0.22446	0.385527	0.766535
AT5G54440.1	2.42	0.245164	0.384132	0.734143
AT2G28430.1	1.538	0.232449	0.360675	0.733527
AT2G01870.1	2.349	0.185732	0.401757	0.833643
AT3G02860.2	2.087	0.300634	0.373803	0.640125
AT1G48920.1	1.625	0.383362	0.359739	0.522727
AT2G28890.1	1.839	0.248295	0.367112	0.71342
AT1G08580.1	1.545	0.335482	0.367875	0.590133
AT3G08610.1	1.338	0.333325	0.34821	0.568833
AT1G09150.1	1.673	0.272349	0.369684	0.680148
AT3G06700.1	1.558	0.380071	0.368153	0.536148
AT2G01970.1	1.741	0.261921	0.374445	0.699484
AT3G19650.1	1.582	0.347678	0.368991	0.578692
AT5G65000.1	1.951	0.227587	0.374905	0.747656
AT1G07020.1	1.612	0.285673	0.356565	0.645708
AT5G65000.2	2.022	0.217348	0.379586	0.768715
AT4G21150.2	1.956	0.251036	0.374758	0.717187
AT4G21150.3	1.604	0.249202	0.371724	0.71802
AT4G21150.1	1.609	0.251166	0.371722	0.714747
AT3G61080.1	1.716	0.302366	0.371873	0.638281
AT5G65020.2	1.829	0.288182	0.375394	0.661963
AT5G65020.1	1.831	0.289308	0.374408	0.660063
AT1G23290.1	1.319	0.294237	0.349447	0.626507
AT5G47500.1	1.627	0.248872	0.366387	0.7124
AT1G34000.1	1.721	0.267297	0.375117	0.693124
AT3G53410.1	1.99	0.209243	0.375745	0.781576
AT5G23940.1	1.725	0.261086	0.370128	0.696487
AT1G13870.1	1.61	0.248272	0.36872	0.715458
AT3G05900.1	1.687	0.357267	0.358077	0.55116
AT1G55140.1	1.689	0.270216	0.370294	0.681454
AT2G26560.1	1.635	0.279163	0.374782	0.677567
AT2G39080.1	1.639	0.280113	0.363324	0.660674
AT4G39838.1	1.891	0.257311	0.372024	0.702991
AT4G02120.1	1.597	0.265602	0.368417	0.688769
AT4G31420.1	1.655	0.292841	0.373725	0.655248
AT2G38870.1	1.568	0.264861	0.362728	0.68132
AT5G38480.2	1.61	0.313195	0.362372	0.612301
AT5G38480.1	1.597	0.339454	0.360492	0.5751
AT3G02110.1	1.82	0.244378	0.377366	0.731404
AT1G17470.1	1.908	0.309739	0.371904	0.627738
AT5G49470.3	2.234	0.248386	0.377739	0.721412
AT1G60610.2	1.748	0.211998	0.364389	0.770064
AT1G17470.2	1.905	0.302076	0.371533	0.638029
AT1G09130.3	1.534	0.327909	0.36973	0.605461
AT1G09130.2	1.509	0.329901	0.366912	0.598883
AT1G09130.1	1.524	0.34272	0.36885	0.584356
AT1G55150.1	1.681	0.241073	0.372535	0.731703
AT5G53486.4	1.52	0.200408	0.36958	0.794312
AT1G07780.5	1.461	0.232781	0.359963	0.733349
AT1G07780.2	1.425	0.252558	0.363012	0.705327
AT1G07780.3	1.501	0.222795	0.361828	0.751627
AT1G07780.1	1.419	0.256921	0.362964	0.698607
AT5G38460.1	2.474	0.196507	0.393847	0.810579
AT5G45340.2	1.805	0.208475	0.369818	0.779068
AT3G10070.1	2.243	0.203755	0.381943	0.791553
AT5G19010.1	1.88	0.267779	0.373884	0.691352
AT4G25630.1	1.92	0.256377	0.385401	0.717447
AT4G16360.3	1.956	0.21668	0.374258	0.770932
AT4G16360.2	2.002	0.229206	0.375211	0.750665
AT4G16360.1	1.976	0.23465	0.375892	0.74233
AT2G29970.1	2.09	0.252097	0.377612	0.715481
AT5G19030.2	1.725	0.235613	0.37398	0.739409
AT5G16750.1	2.097	0.244433	0.377133	0.726223
AT4G26970.1	1.57	0.278724	0.367443	0.671263
AT3G22320.1	1.339	0.328046	0.353368	0.583969
AT1G68160.1	1.699	0.199562	0.370912	0.792808
AT3G09490.1	2.175	0.246738	0.390189	0.736191
ATCG00920.1	2.653	0.259677	0.392066	0.696793
AT5G66210.4	1.818	0.275541	0.367099	0.674218
AT5G66210.1	1.738	0.283366	0.363554	0.658362
AT4G13430.1	1.911	0.329753	0.366825	0.598277
AT5G66210.3	1.805	0.265597	0.375289	0.69591
AT5G22330.1	1.531	0.28263	0.370383	0.6675
AT3G17170.1	1.679	0.395129	0.378429	0.533693
AT1G06960.1	1.977	0.26285	0.38699	0.7092
AT4G02380.2	2.09	0.266802	0.372759	0.688297
AT1G06960.3	2	0.251621	0.384491	0.723358
AT1G06960.2	2.025	0.259521	0.389531	0.717949
AT3G24515.1	1.902	0.236274	0.374246	0.7384
AT1G02050.1	1.939	0.232245	0.390804	0.758201
AT5G23860.2	1.813	0.273676	0.368862	0.674247
AT2G36530.1	1.653	0.37068	0.355621	0.53258
AT3G52150.2	1.867	0.332087	0.37661	0.606567
AT3G52150.1	1.871	0.343716	0.376638	0.591869
AT1G14340.1	1.495	0.23583	0.373543	0.740394
AT4G15820.1	1.565	0.320576	0.366375	0.606825
AT2G43410.3	1.758	0.247283	0.371706	0.720032
AT3G52890.1	2.093	0.21631	0.381719	0.775554
AT5G09590.1	1.857	0.280311	0.376711	0.675276
AT1G12270.1	1.752	0.311095	0.371382	0.627728
AT3G12570.1	1.571	0.251041	0.372428	0.716791
AT3G12570.3	1.573	0.245562	0.37067	0.723432
AT3G12570.2	1.594	0.249402	0.369718	0.715465
AT1G29560.2	1.583	0.255526	0.367065	0.704673
AT3G12570.4	1.589	0.241495	0.369867	0.728698
AT5G55070.1	1.702	0.252961	0.36521	0.706175
AT4G02520.1	1.816	0.308538	0.366253	0.622763
AT3G52140.4	2.162	0.266487	0.366668	0.685129
AT2G40830.3	1.75	0.221197	0.36739	0.758135
AT2G40830.1	1.725	0.227871	0.366992	0.747098
AT5G29000.1	1.855	0.256822	0.368727	0.698791
AT3G52140.1	2.144	0.27625	0.36824	0.671706
AT3G52140.2	2.147	0.270563	0.366427	0.678583
AT5G29000.2	1.885	0.251291	0.370461	0.709145
AT5G39840.1	2.345	0.224751	0.383911	0.762373
AT1G74160.1	2.845	0.217899	0.385973	0.77416
AT1G10570.1	1.692	0.242759	0.36687	0.722255
AT2G36000.2	1.723	0.283904	0.364019	0.656
AT1G10570.2	1.691	0.242846	0.365974	0.721019
AT5G13490.2	1.922	0.226235	0.372523	0.752225
AT5G13490.1	1.931	0.226053	0.372242	0.752683
AT5G63310.1	1.931	0.356389	0.372538	0.568704
ATMG01390.1	3.144	0.257266	0.400561	0.714946
AT5G53120.4	1.697	0.274315	0.362114	0.667595
AT1G21240.1	2.678	0.187704	0.409333	0.834544
AT2G36000.1	1.72	0.292461	0.36591	0.645187
AT2G05310.1	1.64	0.306559	0.361883	0.624341
AT4G38090.4	1.739	0.211684	0.369389	0.773434
AT2G42770.1	1.897	0.215757	0.368546	0.766705
AT4G12970.1	1.599	0.258647	0.367903	0.697099
AT4G38090.1	1.674	0.222935	0.366585	0.752897
AT1G80810.2	2.029	0.257918	0.3723	0.702411
AT4G38090.3	1.775	0.210955	0.371466	0.775443
AT4G38090.2	1.811	0.200836	0.370649	0.791819
AT3G22520.1	2.076	0.255069	0.372138	0.707581
AT4G00026.1	1.559	0.295837	0.359931	0.635419
AT5G50640.1	2.384	0.255478	0.379541	0.710458
AT1G55330.1	1.505	0.335925	0.368046	0.591977
AT1G48790.1	1.875	0.262534	0.375774	0.700426
AT1G35460.1	1.967	0.269127	0.370366	0.682888
AT1G49470.1	2.217	0.197733	0.387087	0.806169
AT5G52280.1	1.83	0.320671	0.359609	0.598727
AT1G73820.1	1.767	0.269653	0.371626	0.687582
AT5G53120.3	1.712	0.275126	0.363878	0.668036
AT1G75220.1	1.67	0.247035	0.372004	0.720486
AT3G48560.1	1.746	0.345717	0.355653	0.561323
AT1G16320.1	1.382	0.274486	0.364378	0.674323
AT1G11430.1	1.656	0.360647	0.367823	0.557026
AT4G01100.2	1.497	0.282985	0.361824	0.657451
AT4G01100.1	1.473	0.296314	0.357932	0.632542
AT3G62220.1	1.964	0.202248	0.374178	0.791621
AT2G47640.4	1.54	0.296604	0.362063	0.637507
AT1G61310.1	1.841	0.235629	0.37196	0.737276
AT1G07810.1	1.788	0.269469	0.371537	0.686044
AT1G80500.1	1.72	0.283619	0.36774	0.662141
AT2G47640.1	1.498	0.29992	0.360381	0.631552
AT2G47640.2	1.479	0.291557	0.360024	0.642735
AT2G47640.3	1.498	0.286878	0.359788	0.649134
AT5G57760.1	1.63	0.274063	0.380325	0.688751
AT1G68590.1	1.463	0.324556	0.365534	0.604257
AT1G68590.2	1.359	0.303176	0.364482	0.633904
AT3G19180.2	2.906	0.187939	0.383454	0.818098
AT2G18160.1	2.216	0.236063	0.380579	0.745842
AT1G75510.1	1.622	0.328481	0.364863	0.595815
AT3G45050.4	1.69	0.237833	0.366836	0.730352
AT1G68725.1	1.644	0.246147	0.361612	0.713671
AT1G73230.1	1.625	0.333611	0.370321	0.594933
AT1G66410.2	1.983	0.302162	0.381799	0.651786
AT1G66410.1	1.735	0.363758	0.362626	0.548174
AT1G04430.2	1.965	0.310725	0.363614	0.616616
AT4G12040.2	2.972	0.232522	0.406163	0.769108
AT5G07470.1	1.613	0.292157	0.367941	0.650476
AT4G12040.1	2.607	0.279272	0.390575	0.684093
AT4G27280.1	1.473	0.317911	0.371344	0.622116
AT1G32130.2	1.665	0.299977	0.367087	0.63508
AT1G76800.1	1.636	0.23051	0.373422	0.749118
AT1G69230.1	1.523	0.210178	0.364952	0.774821
AT3G12145.1	2.138	0.25703	0.371675	0.701575
AT5G65310.1	1.978	0.297842	0.364484	0.639281
AT3G11170.1	2.393	0.326968	0.373534	0.605516
AT1G26760.1	1.903	0.224097	0.370369	0.753241
AT1G76820.1	2.127	0.274003	0.376243	0.681979
AT3G58640.2	2.107	0.232734	0.381041	0.748337
AT5G53460.2	1.875	0.30859	0.36439	0.622969
AT3G54400.1	1.68	0.259131	0.37323	0.705224
AT1G24040.1	1.825	0.23846	0.389986	0.746315
AT4G35830.1	1.562	0.307032	0.363847	0.625676
AT4G22140.1	1.862	0.215513	0.364155	0.762868
AT4G22140.2	1.832	0.250547	0.363622	0.704981
AT2G33730.1	1.67	0.321483	0.362156	0.602484
AT3G26782.1	2.505	0.21283	0.392861	0.789937
AT4G16670.1	1.91	0.215205	0.36522	0.764579
AT4G33666.1	1.619	0.314504	0.379726	0.631657
AT4G21810.1	1.708	0.22769	0.371779	0.752415
AT5G11260.1	1.745	0.230506	0.37595	0.752283
AT1G64370.1	1.642	0.344364	0.372539	0.586366
AT4G05420.2	1.824	0.246746	0.367239	0.716746
AT3G01540.3	1.82	0.323215	0.364473	0.602215
AT3G01540.4	1.804	0.326738	0.365759	0.598954
AT4G18390.1	1.979	0.21809	0.382316	0.774419
AT3G07950.1	1.735	0.238263	0.374045	0.73698
AT3G55260.1	1.902	0.255514	0.3708	0.703787
AT5G56950.1	2.015	0.30786	0.367097	0.625693
AT3G24120.2	1.921	0.240629	0.374813	0.733867
AT3G24120.1	1.684	0.280399	0.368591	0.667843
AT1G50490.1	1.707	0.236598	0.368793	0.734616
AT1G65470.2	2.155	0.249727	0.375889	0.717538
AT3G31161.1	1.409	0.517551	0.301163	0.292881
AT3G23600.1	1.859	0.355407	0.374082	0.569257
AT1G54050.1	1.302	0.264068	0.361936	0.688855
AT2G39930.1	1.751	0.24016	0.370944	0.730856
AT2G38810.3	1.622	0.201795	0.361956	0.786302
AT2G38810.2	1.575	0.221943	0.366438	0.757977
AT2G38810.1	1.623	0.203205	0.362969	0.784862
AT5G38870.1	1.429	0.32135	0.374902	0.618296
AT4G22320.1	1.556	0.314869	0.36866	0.618968
AT4G22320.2	1.534	0.300596	0.366462	0.637025
AT4G23600.1	2.064	0.309935	0.363756	0.618785
AT1G65280.1	1.786	0.336286	0.362991	0.58524
AT4G23600.3	2.086	0.297305	0.364813	0.637585
AT1G13880.1	1.923	0.257888	0.370001	0.701487
AT3G26510.4	1.6	0.264904	0.368156	0.688649
AT3G26510.5	1.848	0.211475	0.370566	0.774404
AT4G15130.1	1.705	0.309443	0.367458	0.624171
AT3G47370.1	1.716	0.301787	0.362734	0.629407
AT3G26510.1	1.725	0.244312	0.368239	0.719672
AT3G26510.2	1.575	0.262904	0.367741	0.691646
AT3G26510.3	1.714	0.211446	0.368746	0.774244
AT3G46610.1	1.736	0.286909	0.371788	0.66153
AT2G15280.2	1.594	0.221142	0.368835	0.75887
AT2G15280.1	1.586	0.235708	0.373946	0.741542
AT2G30260.1	1.579	0.273008	0.362156	0.668596
AT1G12880.1	2.1	0.213693	0.37876	0.772944
AT3G13330.1	2.069	0.22979	0.383688	0.755974
AT4G32570.1	1.867	0.236421	0.371952	0.736009
AT5G14740.5	1.89	0.27909	0.376952	0.680317
AT5G65620.1	1.783	0.301056	0.366038	0.63644
AT1G72250.1	2.164	0.207219	0.373426	0.783527
AT1G72250.2	2.068	0.216683	0.374382	0.7699
AT1G14410.1	1.756	0.275832	0.373596	0.679788
AT2G30200.2	1.752	0.250511	0.368218	0.714042
AT3G16180.1	2.781	0.223711	0.388858	0.767994
AT2G30200.1	1.681	0.291907	0.368079	0.65106
AT1G63120.1	1.645	0.235631	0.381075	0.74613
AT4G34030.1	1.674	0.277711	0.362282	0.665219
AT2G41750.1	1.532	0.24904	0.371882	0.720772
AT4G22930.1	1.985	0.225254	0.375399	0.75724
AT3G47910.2	1.79	0.272708	0.371194	0.68085
AT4G37310.1	1.715	0.247549	0.375149	0.725059
AT3G60380.1	2.018	0.229651	0.377261	0.752085
AT5G16070.1	1.795	0.271103	0.368025	0.678631
AT4G33650.2	2.395	0.228388	0.384473	0.757997
AT1G78570.1	1.757	0.297008	0.370256	0.646888
AT4G33650.1	2.333	0.233036	0.383259	0.749953
AT1G27350.1	1.587	0.277473	0.362537	0.660971
AT5G64360.4	1.895	0.238768	0.36874	0.72777
AT5G64360.3	1.836	0.235125	0.366831	0.732571
AT5G64360.2	1.97	0.22264	0.370953	0.756666
AT5G64360.1	2.131	0.216194	0.380527	0.773847
AT2G30950.1	1.732	0.367716	0.361902	0.542232
AT1G18700.2	1.791	0.21374	0.371523	0.772916
AT1G18700.3	1.716	0.223261	0.368983	0.755759
AT1G18700.1	1.754	0.227563	0.372548	0.751928
AT1G68190.1	2.394	0.243077	0.392546	0.741291
AT1G18700.4	1.749	0.222788	0.37061	0.757873
AT1G53885.1	1.44	0.241259	0.37625	0.737123
AT5G63840.1	1.613	0.280823	0.362286	0.658996
AT3G10040.1	1.766	0.215005	0.366427	0.767465
AT1G69250.1	1.789	0.237363	0.372633	0.735475
AT1G69250.2	1.855	0.224366	0.372861	0.755337
AT3G03460.1	1.552	0.238859	0.368043	0.731885
AT3G58670.1	1.837	0.234235	0.373897	0.743344
AT1G72640.2	1.886	0.297233	0.37915	0.651892
AT3G11630.1	1.712	0.379811	0.357246	0.520171
AT5G39600.1	1.516	0.274282	0.365538	0.67056
AT2G19450.1	2.081	0.214865	0.376384	0.772695
AT5G40790.1	1.425	0.290016	0.362736	0.645485
AT2G33770.1	2.002	0.251682	0.371598	0.713417
AT3G59310.1	2.065	0.203192	0.379707	0.793639
AT5G53770.1	2.241	0.259653	0.378764	0.7075
AT5G39350.1	1.812	0.236507	0.367986	0.730594
AT1G08180.1	1.597	0.261267	0.382117	0.712841
AT5G57930.1	1.526	0.293795	0.357489	0.636346
AT5G57930.2	1.527	0.302823	0.35622	0.621305
AT5G52370.1	1.442	0.303393	0.362874	0.627841
AT1G20510.1	2.037	0.306407	0.367652	0.627165
AT1G20510.2	2.104	0.291334	0.366922	0.64932
AT5G14570.1	1.804	0.230949	0.378071	0.750702
AT1G25450.1	1.623	0.252916	0.367753	0.708475
AT1G77450.1	1.967	0.224676	0.368433	0.753051
AT2G17530.2	1.989	0.233662	0.38078	0.749547
AT5G09740.1	1.901	0.315771	0.382329	0.630402
AT2G44620.1	1.408	0.281297	0.368617	0.66893
AT4G35110.4	2.289	0.244814	0.38508	0.733877
AT4G35110.3	2.275	0.235332	0.377717	0.74282
AT4G35110.2	2.272	0.236938	0.377376	0.739691
AT4G35110.1	2.279	0.234304	0.376296	0.742725
AT2G42590.3	1.722	0.29808	0.372319	0.646133
AT5G49890.1	2.316	0.206877	0.379869	0.787185
AT2G42590.1	1.623	0.318796	0.366083	0.609448
AT5G09850.1	2.113	0.26539	0.375588	0.697642
AT1G16880.2	1.501	0.290847	0.360938	0.6462
AT1G16880.1	1.373	0.329264	0.356245	0.587015
AT2G27450.2	2.021	0.232228	0.36592	0.736923
AT4G09180.1	1.555	0.285163	0.361583	0.652315
AT1G45688.1	1.717	0.32754	0.362512	0.59492
AT1G28420.1	2.361	0.249924	0.375353	0.71826
AT1G45688.2	1.751	0.302239	0.365539	0.633726
AT2G21620.2	1.676	0.282795	0.355192	0.648964
AT4G35100.1	1.454	0.353758	0.358725	0.557589
AT4G35100.2	1.474	0.332171	0.365272	0.594155
AT2G21620.1	1.589	0.305524	0.352425	0.613405
AT4G00950.1	1.66	0.283998	0.372729	0.667879
AT1G32790.1	1.562	0.281697	0.368587	0.668159
AT4G00090.1	1.942	0.267932	0.370251	0.686246
AT1G29970.1	1.692	0.214321	0.373031	0.774421
AT3G18000.1	1.519	0.306616	0.363252	0.625342
AT1G29970.2	1.75	0.258958	0.367737	0.698133
AT5G57700.3	1.688	0.253747	0.378949	0.715853
AT5G57700.2	1.721	0.247826	0.37937	0.724983
AT5G57700.1	1.74	0.243159	0.381348	0.734419
AT2G02230.1	1.554	0.308518	0.362431	0.616741
AT5G10870.1	1.604	0.244894	0.366931	0.719726
AT5G57700.4	1.659	0.255094	0.375323	0.710047
AT1G29950.2	1.845	0.217703	0.369697	0.764556
AT1G29950.1	1.765	0.226572	0.366535	0.746292
AT3G07060.1	2.398	0.193333	0.395849	0.819162
AT1G64140.1	1.671	0.294933	0.363187	0.639024
AT1G19010.1	2.06	0.24436	0.373877	0.723578
AT4G33630.1	1.594	0.303365	0.365695	0.632725
AT4G33630.2	1.62	0.299158	0.366572	0.639412
AT3G51420.1	1.999	0.291794	0.373329	0.656643
AT3G48760.1	1.733	0.290649	0.370724	0.653422
AT1G17880.1	1.645	0.302597	0.362789	0.627603
AT5G01520.2	2.05	0.19699	0.378938	0.803748
AT1G36980.1	1.826	0.280574	0.36858	0.665229
AT5G62190.1	1.748	0.340966	0.362282	0.575366
AT2G38950.1	1.842	0.244304	0.365836	0.718138
AT1G32220.1	1.724	0.277558	0.37072	0.673726
AT4G24830.2	1.951	0.246562	0.379249	0.728551
AT5G10660.2	7	0.176374	0.86342	0.962834
AT2G14120.1	1.869	0.26373	0.369739	0.693335
AT4G17330.1	1.928	0.266173	0.3738	0.692049
AT2G14120.2	1.873	0.263421	0.36965	0.693686
AT1G07350.1	1.894	0.258172	0.372873	0.70596
AT4G02890.1	1.657	0.313272	0.361754	0.615873
AT4G02890.2	1.369	0.31359	0.360126	0.613709
AT1G09760.1	1.688	0.286472	0.376973	0.669985
AT4G02890.4	1.686	0.329403	0.359385	0.589955
AT3G26980.1	1.593	0.233429	0.370278	0.742813
AT2G41231.1	3.955	0.159968	0.738805	0.955829
AT3G17120.2	1.743	0.221954	0.367	0.757949
AT1G74510.1	2.018	0.23881	0.371456	0.730659
AT5G25280.1	1.884	0.274692	0.361345	0.666061
AT1G74510.2	2.102	0.214387	0.375263	0.774187
AT5G13810.1	1.71	0.241837	0.365926	0.722175
AT4G25690.2	1.369	0.304906	0.364826	0.631551
AT4G09890.1	1.46	0.282753	0.373305	0.672335
AT4G27990.1	1.742	0.296538	0.379926	0.659365
AT1G72740.2	1.725	0.265572	0.375579	0.697309
AT3G52850.1	1.978	0.336696	0.36808	0.586806
AT1G74910.1	1.859	0.25948	0.372762	0.703196
AT3G04730.1	1.73	0.26505	0.369156	0.690097
AT1G74910.3	1.782	0.26125	0.373369	0.70182
AT1G74910.2	1.845	0.261447	0.372656	0.700194
AT1G51720.1	1.696	0.274013	0.368089	0.675144
AT2G44360.1	1.811	0.28925	0.38247	0.666717
AT2G44680.1	1.792	0.235093	0.367554	0.731974
AT5G03540.1	1.625	0.287509	0.366529	0.655795
AT5G03540.2	1.647	0.274857	0.368337	0.676934
AT2G44680.2	1.832	0.235613	0.369701	0.732358
AT5G05950.1	2.163	0.217262	0.386144	0.774488
AT3G43300.1	1.85	0.252004	0.375837	0.716956
AT4G38490.1	1.778	0.234609	0.370637	0.7373
AT5G60390.2	1.558	0.352176	0.364051	0.566715
AT3G46670.1	1.692	0.279845	0.361088	0.660477
AT1G30580.1	1.565	0.329636	0.366534	0.599389
AT5G04250.1	2.011	0.279688	0.379308	0.677413
AT4G16442.1	1.597	0.229157	0.373485	0.750347
AT5G60390.3	1.561	0.378688	0.362183	0.532644
AT1G75760.1	2.012	0.24581	0.380964	0.731086
AT5G42000.2	1.372	0.250329	0.354348	0.699514
AT1G34220.2	2.103	0.228452	0.36795	0.744939
AT4G34090.1	1.983	0.205711	0.372992	0.785708
AT4G34090.3	1.806	0.245287	0.372029	0.722084
AT4G34090.2	1.958	0.206828	0.371722	0.783084
AT5G45710.1	2.194	0.202066	0.38215	0.798795
AT5G20280.1	1.623	0.324455	0.362717	0.599015
AT2G43770.1	1.963	0.24787	0.379297	0.727036
AT2G39720.1	1.986	0.260377	0.389653	0.715173
AT3G53670.1	1.582	0.229437	0.374063	0.750952
AT3G53670.2	1.629	0.220273	0.375451	0.76593
AT3G57230.1	1.642	0.24441	0.372616	0.727109
AT3G57230.2	1.786	0.22321	0.378886	0.763449
AT4G36870.1	1.981	0.258167	0.37054	0.70155
AT4G39860.1	2.157	0.251324	0.381372	0.722418
AT4G36870.2	2.008	0.257195	0.371199	0.703738
AT1G11790.2	2.074	0.208531	0.377672	0.785454
AT1G11790.1	1.889	0.219366	0.366917	0.759875
AT3G06070.1	1.786	0.266117	0.370708	0.691943
AT2G06510.2	1.653	0.249298	0.366318	0.711298
AT1G24180.1	1.579	0.290406	0.358173	0.64127
AT1G59710.1	1.945	0.215102	0.377611	0.774287
AT3G01710.1	1.897	0.25544	0.380268	0.713431
AT5G10180.1	1.779	0.295732	0.372262	0.649357
AT4G31890.2	1.886	0.210786	0.373792	0.779156
AT3G01710.2	1.813	0.254627	0.376163	0.711983
AT3G51830.1	2.033	0.253397	0.371752	0.710853
AT5G12040.2	2.112	0.246837	0.380066	0.727896
AT4G02200.1	2.188	0.201247	0.378453	0.795334
AT1G17145.1	1.616	0.268722	0.372291	0.68872
AT4G02200.3	2.271	0.186235	0.380594	0.820448
AT1G73040.1	1.718	0.263769	0.37986	0.702944
AT2G30520.3	2.046	0.227389	0.37932	0.756964
AT2G30520.2	2.122	0.217034	0.380819	0.774386
AT2G30520.1	1.991	0.237858	0.378098	0.738985
AT1G08420.2	2.3	0.260387	0.374978	0.701395
AT5G53800.1	1.602	0.39503	0.344137	0.489346
AT1G08420.1	2.251	0.272426	0.373579	0.681518
AT4G26965.2	2.256	0.227622	0.385261	0.760086
AT4G26965.1	2.209	0.219728	0.38924	0.776574
AT3G05880.1	1.283	0.333337	0.352908	0.574955
AT5G48630.1	1.558	0.27508	0.370266	0.67924
AT4G22530.1	2.031	0.222974	0.383236	0.7657
AT2G34585.1	1.735	0.271629	0.361779	0.661343
AT5G48230.1	2.188	0.236225	0.378062	0.743641
AT4G24330.1	1.835	0.282834	0.363299	0.655548
AT3G12955.1	2.126	0.145796	0.377016	0.878843
AT4G03415.2	1.86	0.263559	0.365539	0.688847
AT2G30530.1	2.042	0.248224	0.384008	0.726021
AT4G03415.1	1.845	0.272433	0.365721	0.675633
AT5G02290.2	1.503	0.29086	0.364798	0.648877
AT3G09770.1	2.198	0.296707	0.380592	0.652765
AT1G50300.1	1.667	0.292823	0.371254	0.652013
AT3G12600.2	1.326	0.285425	0.362893	0.657116
AT3G12600.1	1.397	0.283982	0.365625	0.661749
AT1G45231.2	1.951	0.265829	0.385331	0.704261
AT4G24470.2	1.862	0.222446	0.371052	0.756291
AT4G24470.3	1.901	0.22172	0.377168	0.763602
AT4G24470.1	1.839	0.238327	0.372124	0.732055
AT5G01460.1	1.783	0.218792	0.373904	0.765338
AT5G11680.1	1.641	0.273935	0.3696	0.677772
AT1G17980.2	2.107	0.229088	0.376342	0.750406
AT5G17630.1	1.794	0.240354	0.375058	0.734413
AT1G05680.1	1.877	0.227862	0.376217	0.754131
AT1G69060.1	2.092	0.242855	0.383532	0.736137
AT3G15660.1	1.732	0.295488	0.374841	0.651091
AT2G48160.1	1.888	0.27056	0.364768	0.677012
AT1G53210.1	1.986	0.290986	0.379183	0.660922
AT3G15660.2	1.746	0.298985	0.379609	0.652008
AT3G02060.1	1.863	0.273011	0.375034	0.68392
AT1G16410.1	2.204	0.244648	0.378081	0.729918
AT1G16410.2	2.068	0.241534	0.373255	0.731497
AT5G14430.1	2.054	0.252236	0.37786	0.717389
AT5G14430.2	2.068	0.249306	0.3781	0.722017
AT5G59880.2	1.834	0.334961	0.362688	0.581326
AT1G79080.1	1.886	0.278761	0.368547	0.668227
AT4G33480.1	1.8	0.290571	0.3658	0.649131
AT3G47370.2	1.484	0.290418	0.362193	0.645857
AT1G16470.2	1.642	0.212654	0.366706	0.771596
AT5G64880.1	1.813	0.239173	0.374978	0.738201
AT3G06420.1	1.623	0.251025	0.38966	0.730562
AT1G16470.1	1.579	0.243727	0.368707	0.723562
AT4G31890.1	1.892	0.210354	0.37331	0.779113
AT3G52720.2	1.636	0.210565	0.364476	0.773649
AT5G50210.1	2.516	0.255462	0.381404	0.713921
AT1G29890.1	2.11	0.224472	0.379264	0.762048
AT5G09443.1	1.835	0.244378	0.384118	0.734991
AT1G78210.1	1.801	0.237267	0.369522	0.734895
AT3G14980.1	2.327	0.243546	0.37371	0.724662
AT3G59500.1	2.396	0.222236	0.389786	0.771999
AT2G47910.1	1.567	0.312895	0.365201	0.620194
AT2G47910.2	1.628	0.277445	0.364666	0.670132
AT1G42990.1	1.594	0.283892	0.372034	0.666007
AT1G31150.1	2.029	0.189195	0.367095	0.806854
AT1G04300.3	1.967	0.288696	0.371576	0.661159
AT1G04300.2	1.987	0.281498	0.372776	0.673134
AT3G16370.1	1.939	0.304844	0.368317	0.629228
AT1G51570.1	1.706	0.311624	0.362523	0.613399
AT5G48180.1	1.492	0.396888	0.365375	0.516856
AT5G64220.2	2.053	0.221289	0.380558	0.766794
AT5G64220.1	2.018	0.224056	0.379352	0.761583
AT2G40430.2	1.615	0.302599	0.366829	0.634853
AT2G40430.3	1.552	0.313681	0.363403	0.615912
AT5G43020.1	2.092	0.207282	0.37758	0.787706
AT2G40430.1	1.59	0.31511	0.363514	0.613019
AT2G16405.1	1.902	0.226527	0.371878	0.751331
AT5G42100.2	1.776	0.265856	0.369654	0.690876
AT5G42100.1	1.776	0.274163	0.370296	0.678363
AT3G16310.1	1.927	0.268014	0.368485	0.682494
AT1G07720.1	1.57	0.291573	0.367265	0.651081
AT5G58470.2	1.663	0.286975	0.370151	0.659867
AT5G63670.1	1.353	0.299161	0.365231	0.637986
AT5G40140.1	2.561	0.174988	0.406648	0.852984
AT5G63670.2	1.594	0.227766	0.371503	0.752843
AT3G52520.1	1.53	0.27485	0.368478	0.676848
AT5G54250.1	1.962	0.249044	0.37531	0.718161
AT5G54250.2	2.018	0.236766	0.377731	0.740078
AT5G54250.3	1.998	0.240693	0.37641	0.732231
AT2G40410.1	1.651	0.254646	0.365609	0.703989
AT2G40410.2	1.715	0.252756	0.364624	0.705945
AT3G58970.1	1.985	0.262389	0.374057	0.697633
AT1G25250.1	1.534	0.252701	0.365982	0.708362
AT5G05060.1	1.701	0.25952	0.376226	0.708568
AT2G38310.1	1.647	0.25013	0.374336	0.720049
AT3G55630.3	1.802	0.264432	0.363605	0.686555
AT1G58180.1	1.491	0.281499	0.363686	0.661926
AT3G55630.1	1.892	0.246216	0.366527	0.717166
AT1G58180.3	1.538	0.26947	0.364871	0.679588
AT1G58180.4	1.473	0.28568	0.362475	0.653479
AT2G36790.1	2.065	0.203145	0.382761	0.797189
AT2G34430.1	1.948	0.32966	0.366888	0.596872
AT5G25130.1	1.978	0.256638	0.364464	0.696759
AT1G54580.1	1.794	0.271052	0.364651	0.677278
AT2G32510.1	1.434	0.27632	0.355013	0.657835
AT2G01820.1	1.852	0.230102	0.368634	0.744631
AT1G26830.1	1.839	0.315005	0.363419	0.611034
AT2G47160.1	1.965	0.220321	0.378449	0.766949
AT1G51140.1	1.742	0.298343	0.366408	0.639147
AT2G47160.2	1.991	0.215401	0.379575	0.775975
AT5G12210.2	1.775	0.246392	0.361934	0.711611
AT5G55610.2	1.843	0.248414	0.376206	0.722085
AT5G55610.1	1.692	0.26692	0.37052	0.689116
AT5G12210.1	1.771	0.249252	0.361768	0.706822
AT5G13730.1	1.912	0.372215	0.369301	0.54602
AT1G20850.1	1.639	0.3002	0.372186	0.642472
AT1G22160.1	1.462	0.244521	0.362671	0.717538
AT2G18570.1	1.811	0.220611	0.367515	0.754625
AT1G14380.2	1.88	0.24505	0.3774	0.729154
AT1G14380.3	1.732	0.259196	0.37381	0.704237
AT1G74970.1	1.653	0.326857	0.37025	0.605194
AT1G14380.1	1.735	0.257235	0.373297	0.706801
AT1G47530.1	1.654	0.279923	0.366735	0.663108
AT3G16660.1	2.056	0.21649	0.379156	0.774646
AT3G02680.1	2.115	0.184801	0.373701	0.81872
AT3G62700.1	1.965	0.264569	0.370481	0.690594
AT2G42910.1	1.509	0.281129	0.372005	0.67124
AT4G02590.1	1.715	0.28894	0.375279	0.662119
AT3G62650.2	1.681	0.265181	0.362127	0.68383
AT5G55600.2	1.969	0.268613	0.378504	0.693586
AT5G24530.1	1.706	0.271759	0.37158	0.685459
AT4G08555.1	1.572	0.221186	0.375328	0.766235
AT3G03140.1	1.894	0.259086	0.374135	0.704366
AT3G61960.1	2.367	0.204582	0.37849	0.789907
AT1G23440.1	1.38	0.276743	0.370062	0.676565
AT1G34360.1	1.7	0.224795	0.377503	0.760963
AT4G27720.1	1.582	0.247033	0.365095	0.714256
AT2G24570.1	2.003	0.229376	0.378781	0.753551
AT3G61020.1	3.088	0.169097	0.397601	0.855646
AT3G28300.1	1.87	0.338692	0.374723	0.594565
AT3G44330.1	1.768	0.231273	0.373266	0.746669
AT2G27500.3	1.71	0.211176	0.366612	0.773574
AT2G22010.1	2.485	0.231161	0.399505	0.760075
AT2G22010.2	2.634	0.207884	0.399936	0.796312
AT4G00630.1	1.779	0.269557	0.37181	0.687801
AT4G27740.1	1.432	0.266538	0.36106	0.678635
AT4G12917.1	1.732	0.212484	0.378165	0.782523
AT1G15480.1	2.462	0.232764	0.393353	0.756048
AT1G75440.1	1.703	0.213894	0.368995	0.77047
AT3G50970.1	1.651	0.356279	0.366751	0.564304
AT2G38640.1	1.607	0.255706	0.368457	0.705818
AT3G45260.1	1.444	0.267489	0.36577	0.687539
AT4G00355.1	1.722	0.25549	0.367187	0.702465
AT4G00355.2	1.733	0.262485	0.369797	0.694241
AT4G00355.3	1.781	0.238277	0.37108	0.73392
AT4G00355.4	1.869	0.251195	0.380256	0.720979
AT3G61060.1	2.031	0.219831	0.395026	0.777898
AT3G45240.3	1.629	0.224217	0.367036	0.750356
AT3G45240.2	1.618	0.225114	0.36497	0.747332
AT3G48360.1	1.812	0.302165	0.376635	0.645518
AT3G26710.1	1.794	0.299375	0.381694	0.656767
AT3G14930.2	1.801	0.312411	0.376849	0.633103
AT5G17160.1	1.778	0.267246	0.376025	0.695626
AT3G21140.1	1.574	0.230381	0.367411	0.74388
AT5G08470.1	2.236	0.233201	0.381137	0.74843
AT1G26620.1	2.808	0.230045	0.391356	0.758024
AT2G17350.1	1.537	0.361733	0.357182	0.543234
AT1G78020.1	1.695	0.278964	0.367083	0.665582
AT5G43720.1	1.953	0.265968	0.366856	0.687208
AT1G50020.1	1.699	0.249384	0.362698	0.707887
AT4G00050.1	1.72	0.257636	0.38068	0.712582
AT3G50210.2	1.648	0.24127	0.373323	0.732305
AT3G50210.3	1.626	0.254042	0.374501	0.713766
AT5G20680.2	2.091	0.234795	0.373095	0.738319
AT3G50210.1	1.659	0.25058	0.374488	0.718611
AT5G03710.1	1.977	0.358493	0.425076	0.603499
AT3G07700.3	1.446	0.253105	0.363067	0.705308
AT3G20100.1	1.827	0.272522	0.368434	0.680038
AT2G17340.1	1.633	0.272528	0.37012	0.6827
AT3G43720.1	1.417	0.283213	0.361008	0.65524
AT2G30140.1	1.901	0.287343	0.372638	0.658287
AT2G30140.2	1.901	0.288007	0.372747	0.657291
AT4G38230.3	2.331	0.20959	0.388033	0.788204
AT5G56750.1	1.904	0.262549	0.367322	0.690665
AT4G38225.3	1.62	0.251962	0.367939	0.711052
AT4G38225.2	1.87	0.256841	0.366494	0.698589
AT4G38225.1	1.817	0.275184	0.366804	0.671549
AT3G05730.1	1.844	0.294281	0.375356	0.652595
AT5G11860.4	1.811	0.277984	0.37494	0.677438
AT5G53940.1	1.485	0.319081	0.368939	0.610409
AT5G03730.2	1.964	0.25226	0.366305	0.705457
AT5G03730.1	1.964	0.252074	0.365889	0.704911
AT3G18535.1	1.817	0.24803	0.363759	0.706982
AT3G02720.1	1.775	0.273744	0.364425	0.672881
AT5G56740.1	2.504	0.230792	0.388225	0.757893
AT5G49015.2	1.373	0.274937	0.361642	0.671002
AT1G20620.2	1.905	0.35497	0.369184	0.565629
AT2G19430.1	1.831	0.235422	0.377318	0.745197
AT5G14600.1	2.827	0.203671	0.406799	0.807615
AT5G02500.2	1.684	0.332671	0.365726	0.589698
AT2G18510.1	2.059	0.27742	0.367204	0.668836
AT1G16260.1	1.835	0.234791	0.371338	0.738719
AT3G61060.2	2.068	0.216298	0.393435	0.781906
AT5G09860.1	1.875	0.220965	0.372083	0.759697
AT1G20620.1	1.887	0.377214	0.364044	0.531818
AT5G13400.1	2.103	0.23029	0.382209	0.751005
AT3G25030.1	1.875	0.264963	0.372902	0.694242
AT1G18300.1	1.74	0.253434	0.378519	0.721093
AT4G08980.1	1.907	0.291724	0.373912	0.656237
AT4G08980.2	2.014	0.255766	0.374009	0.709776
AT3G08000.1	2.147	0.195764	0.380985	0.805306
AT2G18890.1	1.956	0.230876	0.377505	0.748141
AT1G50430.1	1.602	0.281338	0.369485	0.66567
AT1G50430.2	1.642	0.27989	0.368078	0.665452
AT5G07740.1	2.204	0.253666	0.370528	0.708323
AT1G12900.2	1.675	0.337872	0.370046	0.592085
AT1G12900.3	1.679	0.352825	0.366634	0.567686
AT1G12900.1	1.659	0.348465	0.367819	0.575615
AT5G64330.2	2.089	0.227682	0.373497	0.752489
AT1G12900.4	1.706	0.333166	0.371001	0.597741
AT5G65760.1	1.84	0.21929	0.376377	0.765492
AT1G50450.1	1.846	0.312985	0.369479	0.61952
AT1G19600.1	1.695	0.281863	0.36857	0.66512
AT3G13690.1	1.819	0.225983	0.372219	0.753502
AT3G52580.1	1.821	0.287132	0.376216	0.666857
AT1G71210.1	2.53	0.190907	0.376449	0.810782
AT1G17970.1	2.186	0.224819	0.38314	0.763184
AT3G01472.1	1.779	0.23918	0.376471	0.736755
AT3G13320.1	1.938	0.215594	0.382042	0.777203
AT5G48570.1	1.791	0.26237	0.375331	0.700631
AT3G15220.1	1.736	0.231455	0.371845	0.745711
AT4G37930.1	1.784	0.375631	0.365584	0.538974
AT2G31740.1	1.899	0.232812	0.373671	0.744792
AT1G13360.1	1.831	0.235793	0.374629	0.741625
AT1G13360.3	1.701	0.249633	0.370965	0.716737
AT1G13360.2	1.726	0.245651	0.372802	0.724837
AT3G18140.1	1.522	0.252275	0.363892	0.707603
AT3G14660.1	1.768	0.26269	0.366945	0.692962
AT1G09310.1	1.558	0.369259	0.369724	0.552641
AT5G15770.1	1.753	0.294323	0.383294	0.661728
AT5G38720.1	1.464	0.343813	0.360856	0.572533
AT3G48780.1	1.836	0.22139	0.370702	0.759555
AT1G14140.1	1.62	0.266842	0.369605	0.690127
AT5G64030.1	1.882	0.291528	0.366674	0.648834
AT3G59068.1	1.456	0.207924	0.379547	0.790385
AT2G05812.1	1.635	0.252106	0.365321	0.706848
AT5G19150.1	1.838	0.234375	0.37497	0.743056
AT5G19150.2	1.816	0.241871	0.378592	0.735131
AT5G50440.1	1.611	0.272639	0.365757	0.677673
AT3G22260.2	1.809	0.236173	0.370311	0.734427
AT3G22260.3	1.764	0.242288	0.37068	0.726108
AT3G22260.1	1.805	0.230698	0.37021	0.743699
AT3G15070.1	2.466	0.218931	0.388635	0.77561
AT4G19960.2	2.167	0.215673	0.377288	0.772999
AT1G66150.1	2.137	0.236186	0.370557	0.737018
AT1G03090.2	1.882	0.252347	0.37503	0.716709
AT3G27460.1	1.616	0.23131	0.37654	0.751053
AT1G03090.1	1.89	0.248172	0.375418	0.723782
AT5G50960.1	1.584	0.296589	0.364845	0.641388
AT5G26000.1	1.611	0.40052	0.354857	0.498159
AT5G26000.2	1.605	0.399364	0.354507	0.498946
AT3G04930.2	1.924	0.296858	0.37527	0.649839
AT4G25890.1	1.698	0.258762	0.373057	0.701328
AT3G04930.1	1.783	0.306747	0.372902	0.633586
AT3G22480.2	1.303	0.322545	0.37098	0.616228
AT5G50990.1	1.805	0.195579	0.371124	0.802479
AT3G22480.1	1.312	0.295765	0.362978	0.643496
AT4G02770.1	1.437	0.385943	0.368228	0.530614
AT1G70670.1	1.916	0.219654	0.394347	0.781437
AT4G33460.1	2.02	0.232013	0.385305	0.752246
AT3G61700.1	2.114	0.233219	0.381197	0.747946
AT1G30970.2	1.623	0.246659	0.372822	0.723815
AT1G30970.1	1.622	0.261073	0.374561	0.703381
AT5G05200.1	1.619	0.309883	0.3616	0.618649
AT4G25870.1	1.984	0.231615	0.368161	0.740096
AT5G27390.1	1.536	0.262535	0.368001	0.69563
AT4G14600.1	1.729	0.221154	0.369909	0.760471
AT2G16900.1	1.835	0.24602	0.374642	0.725294
AT2G16900.3	1.816	0.244126	0.374138	0.728008
AT2G16900.2	1.716	0.2869	0.375825	0.665699
AT4G02750.1	1.963	0.219967	0.36876	0.759172
AT1G73180.2	2.039	0.259613	0.373491	0.700821
AT1G04780.1	1.606	0.296603	0.365983	0.642091
AT2G29540.1	1.496	0.298406	0.374913	0.651268
AT5G50315.1	1.941	0.251774	0.368053	0.710332
AT5G35450.1	2.607	0.20364	0.380262	0.793012
AT1G52930.1	1.606	0.27965	0.371886	0.672826
AT1G75630.2	1.973	0.200874	0.379927	0.800123
AT1G75630.1	1.671	0.273177	0.37463	0.684234
AT1G10450.1	2.174	0.243622	0.391061	0.739935
AT5G20290.1	1.821	0.396686	0.3725	0.520761
AT5G13680.1	2.363	0.226651	0.388633	0.760281
AT1G21400.1	1.924	0.241179	0.372452	0.728288
AT2G05250.1	1.698	0.251188	0.367749	0.711801
AT4G14030.1	1.776	0.288019	0.369591	0.658423
AT1G53110.1	1.828	0.258732	0.367568	0.696641
AT3G52105.1	1.777	0.217643	0.370735	0.764718
AT1G64355.2	1.927	0.227588	0.380811	0.758594
AT1G64355.1	1.671	0.252272	0.374839	0.718427
AT3G09920.1	1.858	0.27815	0.37247	0.674097
AT2G01670.1	1.532	0.288523	0.359822	0.645741
AT3G56310.1	1.648	0.304288	0.375309	0.642432
AT3G56310.2	1.64	0.293109	0.372604	0.655055
AT2G32180.1	1.612	0.346935	0.371443	0.582088
AT3G26060.1	1.51	0.356795	0.363406	0.559783
AT4G36210.1	1.653	0.314222	0.36884	0.621585
AT1G78040.2	1.77	0.401614	0.371379	0.516995
AT4G36210.3	1.629	0.329037	0.36594	0.597726
AT5G59440.1	1.94	0.256455	0.374634	0.707868
AT3G07640.1	1.647	0.285942	0.372255	0.66383
AT1G30880.1	1.729	0.355398	0.376951	0.572294
AT1G80670.1	2.407	0.240428	0.389682	0.741445
AT4G13640.2	1.667	0.262079	0.372683	0.698224
AT4G13640.1	1.641	0.256331	0.368916	0.703704
AT5G13240.1	1.902	0.239474	0.386527	0.744242
AT4G38710.2	1.925	0.363717	0.368383	0.555571
AT3G07660.1	1.791	0.232222	0.36787	0.739065
AT4G31130.1	1.631	0.217211	0.371321	0.765959
AT4G30390.1	2.158	0.25657	0.384485	0.714968
AT2G30390.1	1.553	0.307699	0.36281	0.621796
AT2G29310.2	2.553	0.247296	0.378663	0.720423
AT1G08660.1	1.644	0.234757	0.36602	0.734009
AT2G30390.2	1.568	0.290355	0.365625	0.651083
AT4G17720.1	1.623	0.25814	0.36933	0.702093
AT3G60590.4	1.592	0.280317	0.376805	0.675447
AT4G38710.1	1.933	0.374748	0.36859	0.542985
AT3G15360.1	1.765	0.321229	0.361032	0.602679
AT1G17340.1	2.003	0.233347	0.38001	0.74909
AT2G27770.1	1.955	0.223271	0.392221	0.772285
AT5G54290.1	1.984	0.305387	0.371833	0.635268
AT5G54290.2	1.981	0.295707	0.37038	0.64618
AT2G21470.3	2.286	0.224301	0.372415	0.754038
AT2G21470.2	2.461	0.215343	0.379348	0.774312
AT2G21470.1	2.274	0.228922	0.371992	0.745803
AT5G57610.1	1.978	0.225969	0.374265	0.756019
AT5G49160.1	1.828	0.250235	0.382021	0.725315
AT4G28490.1	1.909	0.236081	0.378352	0.742523
AT2G02560.2	2.129	0.225427	0.384494	0.762738
AT1G72680.1	1.652	0.26293	0.367227	0.689941
AT2G02560.1	2.125	0.225077	0.383967	0.762856
AT2G35630.1	2.062	0.284959	0.366024	0.656703
AT3G02260.1	2.812	0.203345	0.381115	0.794276
AT1G61210.2	2.366	0.221914	0.387142	0.770193
AT3G46940.1	1.727	0.238915	0.374212	0.735673
AT5G41700.5	1.973	0.232154	0.373861	0.746193
AT3G61700.2	2.124	0.228275	0.380443	0.754825
AT5G41700.1	1.826	0.312827	0.37832	0.63115
AT3G44100.1	1.773	0.304367	0.376661	0.640376
AT5G41700.3	1.804	0.251393	0.373757	0.716517
AT2G29460.1	1.592	0.260668	0.364357	0.692374
AT2G37230.1	1.97	0.282861	0.37464	0.669516
AT4G21650.1	1.856	0.257644	0.366632	0.695504
AT3G16060.1	1.913	0.319283	0.363441	0.60529
AT4G24930.1	1.511	0.268863	0.36734	0.685501
AT1G20050.1	1.585	0.263987	0.368325	0.690914
AT1G06470.2	1.793	0.225054	0.370056	0.753364
AT3G10220.1	1.745	0.266041	0.365867	0.683755
AT3G59970.1	1.723	0.294512	0.367112	0.645357
AT1G80230.1	1.7	0.281316	0.366611	0.664366
AT3G59970.3	1.676	0.311118	0.36311	0.617782
AT5G58060.1	1.766	0.302208	0.378311	0.645359
AT1G55000.2	1.768	0.273048	0.367703	0.675452
AT1G55000.3	1.737	0.276524	0.365245	0.667788
AT1G55000.1	1.75	0.287732	0.365708	0.651474
AT2G30695.1	1.416	0.275956	0.367871	0.677165
AT2G30695.2	1.501	0.240144	0.368287	0.731945
AT2G20950.4	1.996	0.26585	0.372774	0.693807
ATCG00670.1	1.581	0.251868	0.370314	0.709944
AT1G62045.1	1.814	0.208419	0.376225	0.78513
AT2G20880.1	1.636	0.291841	0.366287	0.649866
AT2G05620.1	1.617	0.294299	0.367009	0.647231
AT1G22790.2	1.597	0.238231	0.363823	0.728855
AT5G27470.1	1.768	0.320127	0.373204	0.617993
AT3G58470.1	1.717	0.252292	0.377741	0.714558
AT1G55020.1	1.714	0.271359	0.367035	0.680575
AT1G56300.1	1.789	0.272725	0.369618	0.678963
AT1G21920.1	2.016	0.218996	0.367154	0.757547
AT4G09000.2	1.787	0.291838	0.36591	0.648945
AT4G09000.1	1.733	0.321235	0.362032	0.602327
AT5G60800.2	1.572	0.333267	0.364816	0.588465
AT5G43190.1	2.236	0.251741	0.380741	0.714178
AT5G60800.1	1.589	0.348731	0.359834	0.561028
AT4G25130.1	1.793	0.33472	0.363925	0.582333
AT2G47470.4	1.586	0.376639	0.363505	0.535495
AT2G47470.3	1.579	0.368993	0.362594	0.543535
AT2G47470.2	1.598	0.375492	0.364366	0.537671
AT2G47470.1	1.576	0.387965	0.361172	0.519618
AT5G04990.1	1.516	0.287752	0.363004	0.65061
AT3G46430.1	1.557	0.297282	0.373151	0.646164
AT3G05230.2	1.779	0.252244	0.381607	0.720049
AT3G54790.1	2.12	0.217495	0.381801	0.773882
AT5G23290.1	1.731	0.289836	0.375141	0.659192
AT3G47860.1	1.656	0.324126	0.370336	0.608937
AT2G26970.2	1.838	0.274284	0.382243	0.691432
AT2G26970.1	1.844	0.28768	0.382183	0.670996
AT5G64560.1	1.626	0.263625	0.370796	0.693399
AT5G64560.2	1.685	0.258813	0.374586	0.702635
AT4G20960.1	1.833	0.280239	0.375459	0.674466
AT2G39770.1	1.438	0.312093	0.362432	0.617321
AT4G12460.1	2.063	0.244881	0.388607	0.73487
AT4G12460.2	2.072	0.23115	0.387406	0.755729
AT2G39770.2	1.437	0.313805	0.362871	0.615497
AT4G32850.8	1.88	0.256724	0.37204	0.703348
AT1G72690.1	1.698	0.22406	0.378897	0.763801
AT1G16180.1	1.501	0.263314	0.367393	0.693003
AT1G72500.1	2.076	0.196507	0.376811	0.801632
AT2G27040.1	1.803	0.234555	0.385116	0.750646
AT2G27040.2	1.813	0.230037	0.384047	0.756632
AT3G58780.3	6.311	0.15298	0.650742	0.950202
AT4G05020.1	1.775	0.241107	0.367279	0.725887
AT4G05020.2	1.892	0.230184	0.374519	0.749152
AT5G63940.1	1.826	0.232452	0.375818	0.745621
AT4G19490.1	1.919	0.231231	0.381535	0.752305
AT4G19490.2	1.964	0.230537	0.383608	0.754663
AT5G01260.2	1.76	0.272482	0.36914	0.675679
AT5G01260.1	1.936	0.240654	0.374499	0.729342
AT3G12030.1	1.67	0.223651	0.377931	0.764629
AT5G61330.1	1.663	0.32257	0.361488	0.598767
AT1G12650.2	1.779	0.267396	0.370635	0.688789
AT1G12650.3	1.775	0.263238	0.370044	0.694503
AT1G12650.1	1.771	0.257239	0.369216	0.703325
AT5G19910.2	1.539	0.199969	0.36934	0.793096
AT1G73885.1	1.445	0.265904	0.369674	0.694658
AT3G12050.2	1.771	0.275339	0.361094	0.665805
AT5G11640.1	1.544	0.250442	0.372286	0.716675
AT3G23820.1	1.89	0.323088	0.361271	0.598752
AT3G12050.1	1.754	0.296146	0.359341	0.632909
AT3G08890.1	1.893	0.239256	0.375537	0.734546
AT3G08890.2	2.048	0.233599	0.382991	0.749397
AT5G02530.2	1.525	0.273355	0.370024	0.681191
AT2G33550.1	1.623	0.30003	0.370007	0.641111
AT5G02530.1	1.593	0.293952	0.371634	0.651263
AT4G09340.1	2.324	0.224699	0.385505	0.762464
AT1G04280.1	2.431	0.246602	0.385307	0.730446
AT5G10750.1	2.216	0.226923	0.373803	0.752326
AT2G34730.1	1.633	0.262418	0.366068	0.692258
AT4G20440.1	1.743	0.236172	0.372461	0.73813
AT2G23080.1	1.716	0.258467	0.380718	0.710663
AT2G23080.2	1.775	0.230127	0.377882	0.75047
AT4G00890.1	1.979	0.226893	0.367518	0.747287
AT1G01910.5	1.642	0.276965	0.373754	0.677289
AT1G01910.4	1.703	0.281256	0.375451	0.671988
AT5G10770.1	2.178	0.182501	0.38862	0.830211
AT1G54390.6	1.89	0.251353	0.384347	0.726713
AT1G01910.1	1.648	0.288206	0.371921	0.657983
AT4G23940.1	1.99	0.247802	0.381181	0.727075
AT1G01910.2	1.622	0.298768	0.370782	0.641876
AT2G27290.1	1.432	0.305013	0.368952	0.63527
AT4G01280.1	1.671	0.267052	0.371209	0.690253
AT4G01280.2	1.664	0.271964	0.372065	0.683864
AT5G20170.1	2.321	0.226158	0.388365	0.764803
AT5G52110.1	1.623	0.249422	0.368594	0.713185
AT4G33350.2	1.809	0.270949	0.377266	0.68897
AT5G52110.2	1.781	0.230393	0.369248	0.743075
AT3G13810.1	1.825	0.238693	0.369621	0.730733
AT1G06890.1	1.663	0.236755	0.365431	0.730699
AT5G27410.2	2.298	0.220261	0.383415	0.769933
AT3G13810.2	1.828	0.230872	0.37082	0.74448
AT1G33700.1	2.245	0.173649	0.384807	0.843041
AT4G31300.1	1.516	0.289226	0.364219	0.649739
AT3G16570.1	1.613	0.254307	0.36112	0.699178
AT1G61240.3	2.51	0.221603	0.387566	0.768946
AT3G23760.1	1.903	0.284175	0.386661	0.67956
AT1G61240.1	2.473	0.224282	0.384056	0.761164
AT1G06890.2	1.64	0.236435	0.36521	0.731565
AT1G61240.4	2.569	0.212404	0.387897	0.783717
AT2G20190.1	2.088	0.243176	0.382001	0.734068
AT3G61210.1	1.47	0.269715	0.367919	0.684953
AT5G27990.1	1.856	0.293103	0.373083	0.648178
AT3G04080.1	2.733	0.2347	0.388212	0.752126
AT2G41710.1	1.614	0.294748	0.36552	0.643551
AT2G41710.2	1.625	0.288307	0.364713	0.651399
AT1G33390.1	2.628	0.218719	0.383074	0.770536
AT2G35020.1	2.026	0.257942	0.374984	0.705879
AT3G43520.1	1.633	0.320033	0.358211	0.596408
AT5G65940.1	1.628	0.301306	0.372072	0.643012
AT4G39180.1	1.935	0.248081	0.367715	0.711791
AT1G12750.2	2.125	0.214461	0.387885	0.784074
AT5G38560.1	2.007	0.254703	0.377857	0.712208
AT5G05660.1	2.091	0.262236	0.385258	0.708801
AT1G26460.1	1.743	0.258475	0.378284	0.710192
AT3G02450.1	1.943	0.305757	0.377556	0.639885
AT1G77510.1	1.783	0.258026	0.362169	0.694701
AT5G54770.1	1.582	0.371793	0.36173	0.539575
AT1G21520.1	1.44	0.264822	0.370697	0.693401
AT1G27150.1	1.937	0.240865	0.37074	0.727999
AT1G15030.1	1.707	0.243372	0.369555	0.725038
AT4G18370.1	1.716	0.297169	0.372209	0.648201
AT3G47490.1	1.549	0.23749	0.369479	0.736439
AT4G19110.1	1.825	0.271153	0.361358	0.672643
AT1G16430.1	1.652	0.235388	0.375882	0.743007
AT4G19110.3	1.722	0.27844	0.363936	0.665982
AT4G19110.2	1.842	0.27219	0.363022	0.673335
AT3G07860.1	1.557	0.248998	0.357431	0.702828
AT5G19190.1	1.481	0.304184	0.360589	0.624843
AT2G04390.1	1.374	0.313258	0.352964	0.604046
AT1G77350.2	2.038	0.231992	0.390726	0.758869
AT1G77350.1	1.896	0.240091	0.384255	0.742428
AT5G12470.1	1.779	0.272539	0.3713	0.682899
AT5G65990.1	1.998	0.273941	0.36953	0.677956
AT3G13440.1	1.74	0.249571	0.364148	0.706697
AT1G64990.1	2.068	0.265662	0.38235	0.699742
AT2G37640.1	2.002	0.228431	0.382415	0.758422
AT1G05840.1	2.492	0.227422	0.388817	0.763581
AT4G38510.1	1.689	0.307232	0.36093	0.619596
AT4G38510.2	1.696	0.306057	0.361663	0.622323
AT4G38510.3	1.718	0.302899	0.362638	0.627625
AT4G38510.4	1.704	0.306545	0.361769	0.621387
AT4G38510.5	1.695	0.294011	0.36179	0.638793
AT1G68260.1	1.56	0.241788	0.366855	0.726854
AT1G57680.2	1.657	0.254825	0.361949	0.700467
AT1G57680.1	1.692	0.251388	0.36053	0.703009
AT1G55340.1	1.405	0.330911	0.357856	0.586873
AT1G55340.2	1.311	0.316669	0.355468	0.603594
AT5G51300.1	1.924	0.266215	0.366111	0.685369
AT1G63090.1	1.727	0.224783	0.366665	0.748921
AT5G51300.3	1.902	0.264903	0.36526	0.686906
AT5G51300.2	1.882	0.268846	0.364635	0.680341
AT4G28030.1	1.611	0.301785	0.369558	0.636766
AT2G17820.1	2.009	0.247359	0.374926	0.722229
AT2G34750.1	1.714	0.276844	0.370701	0.674207
AT4G09320.1	1.591	0.32838	0.36691	0.599999
AT2G38290.1	1.864	0.25008	0.369109	0.710612
AT1G73250.1	1.887	0.210101	0.378472	0.781808
AT5G59160.2	1.999	0.212409	0.383286	0.782036
AT2G38290.2	1.984	0.239614	0.373726	0.730488
AT5G52560.1	2.035	0.223373	0.374634	0.759936
AT5G16220.1	1.935	0.297911	0.369283	0.64203
AT1G47340.1	1.887	0.190853	0.374066	0.80947
AT5G09410.1	1.702	0.237385	0.377153	0.741459
AT5G09410.2	1.705	0.236743	0.377398	0.742682
AT1G71840.1	1.87	0.269737	0.373017	0.686915
AT3G61415.2	1.919	0.229242	0.373671	0.750327
AT1G10650.1	2.249	0.225847	0.378337	0.758521
AT1G10650.2	2.296	0.210843	0.37748	0.781714
AT1G10840.2	1.83	0.236173	0.365852	0.734124
AT2G18300.1	1.463	0.293141	0.368893	0.652167
AT2G18300.3	1.48	0.283663	0.372066	0.670383
AT2G18300.2	1.453	0.304005	0.371153	0.639718
AT3G62900.1	2.257	0.235705	0.372841	0.739472
AT1G65520.1	2.038	0.259516	0.396769	0.722473
AT1G11720.1	2.038	0.271848	0.371493	0.6835
AT1G15420.1	1.664	0.266482	0.36448	0.6781
AT2G39300.2	2.368	0.192174	0.387871	0.815795
AT1G24340.1	2.013	0.218843	0.382053	0.771425
AT5G19090.1	1.731	0.294792	0.37083	0.649837
AT5G09820.1	2.122	0.247707	0.376982	0.717442
AT3G26420.1	2.347	0.222097	0.38444	0.766494
AT5G51440.1	1.651	0.220939	0.37033	0.761535
AT3G46450.2	1.943	0.237906	0.370961	0.733921
AT3G46450.1	1.939	0.242811	0.371651	0.726785
AT2G39360.1	2.204	0.214686	0.373186	0.770596
AT3G09970.1	1.766	0.250245	0.369851	0.713948
AT2G29450.1	1.722	0.38284	0.355358	0.5141
AT1G72010.1	1.95	0.237176	0.384995	0.746298
AT2G45540.1	2.485	0.217997	0.388572	0.776
AT5G47710.1	1.638	0.223775	0.366424	0.751723
AT2G45540.2	2.521	0.213811	0.389082	0.783009
AT3G15390.2	2.104	0.251005	0.379576	0.722767
AT3G14075.1	2.469	0.224912	0.393548	0.769384
AT3G01910.2	1.59	0.305832	0.360815	0.622937
AT3G09630.2	1.493	0.34548	0.359652	0.569036
AT3G05727.1	1.399	0.231135	0.364052	0.739757
AT3G54430.1	2.245	0.215857	0.384404	0.777628
AT2G20130.1	1.802	0.220299	0.374291	0.766112
AT1G31920.1	1.973	0.213666	0.368401	0.768176
AT2G42320.1	1.874	0.264217	0.368655	0.689948
AT2G42320.2	1.91	0.261932	0.370132	0.69492
AT5G47710.2	1.625	0.218792	0.369156	0.763883
AT4G25740.2	1.683	0.241969	0.367617	0.722596
AT4G25740.1	1.565	0.275051	0.361738	0.665651
AT2G45560.2	1.625	0.214348	0.376508	0.774557
AT2G45560.1	1.623	0.198516	0.365178	0.791228
AT5G48030.1	1.922	0.27337	0.367814	0.675672
AT3G51930.1	1.824	0.186687	0.370519	0.814082
AT5G44572.1	2.283	0.244534	0.389916	0.739911
AT5G66510.2	1.93	0.243092	0.367734	0.72217
AT4G09730.1	1.779	0.329905	0.37003	0.601814
AT3G21630.1	1.93	0.252187	0.373003	0.713058
AT5G66510.1	1.923	0.255222	0.367005	0.701287
AT2G15570.1	1.751	0.256818	0.383008	0.717787
AT1G54170.1	2.396	0.24679	0.378425	0.723508
AT2G15570.2	1.746	0.24695	0.37903	0.730056
AT4G00620.1	1.934	0.23058	0.381426	0.753005
AT2G35260.1	1.541	0.33069	0.368111	0.598605
AT3G02900.2	1.663	0.278478	0.368494	0.672012
AT4G39710.1	1.829	0.272013	0.386595	0.699076
AT4G34230.1	1.63	0.35229	0.363486	0.56075
AT4G39710.2	1.868	0.268664	0.394136	0.711034
AT1G29470.2	1.518	0.369374	0.360762	0.541574
AT1G26260.2	1.665	0.206902	0.365739	0.780534
AT1G25275.3	1.402	0.270396	0.358783	0.672895
AT1G25275.2	1.378	0.324088	0.366125	0.604891
AT1G25275.1	1.38	0.324468	0.359331	0.595238
AT1G53430.2	1.821	0.225188	0.370169	0.754195
AT5G40550.2	1.817	0.213259	0.374713	0.776749
AT3G09050.1	1.774	0.264635	0.371286	0.692353
AT3G15640.2	1.724	0.273992	0.376194	0.685416
AT3G15640.1	1.726	0.272285	0.372697	0.684233
AT2G16890.2	1.983	0.235129	0.368988	0.734911
AT1G01040.2	2.46	0.243692	0.381467	0.731397
AT5G14030.4	1.77	0.270714	0.369267	0.680093
AT2G46170.2	2.181	0.218535	0.400351	0.784077
AT5G14030.1	1.778	0.304938	0.369095	0.628819
AT5G14030.2	1.775	0.271348	0.370422	0.680532
AT5G14030.3	1.769	0.268963	0.368124	0.681346
AT5G14820.1	1.813	0.222834	0.367774	0.753408
AT4G36920.2	1.851	0.216343	0.372745	0.769999
AT4G36920.1	1.788	0.233305	0.370827	0.740629
AT5G14050.1	1.663	0.269434	0.36604	0.680247
AT1G60550.1	2.079	0.253428	0.36891	0.705383
AT1G69640.1	1.914	0.27999	0.37197	0.672246
AT3G12990.3	1.693	0.243778	0.355188	0.707681
AT3G12990.2	1.695	0.241626	0.354766	0.710237
AT5G57490.1	1.473	0.276541	0.359895	0.665616
AT5G53050.3	2.061	0.252012	0.372353	0.713213
AT3G13870.2	2.009	0.309517	0.36463	0.620766
AT3G13870.1	1.984	0.315907	0.362761	0.60962
AT1G53165.2	2.155	0.242455	0.377255	0.730189
AT1G53165.3	2.129	0.239712	0.377252	0.734924
AT1G53165.1	2.129	0.248653	0.37847	0.721762
AT2G27210.1	1.932	0.232538	0.366433	0.737516
AT4G34730.1	1.575	0.268725	0.371288	0.689656
AT2G47070.1	1.937	0.26766	0.374582	0.692978
AT2G27210.2	1.981	0.220134	0.367101	0.758169
AT2G30930.1	1.764	0.295567	0.373762	0.64928
AT5G57480.1	1.994	0.200163	0.378653	0.797864
AT4G03410.1	2.252	0.167035	0.378715	0.850324
AT3G14595.1	1.6	0.245132	0.371695	0.724189
AT3G08530.1	2.026	0.297654	0.370698	0.643977
AT5G14970.1	1.615	0.288798	0.367432	0.653804
AT2G41160.1	2.028	0.216961	0.377181	0.770528
AT5G15810.1	1.988	0.246172	0.37279	0.721103
AT5G56340.1	1.615	0.255526	0.369459	0.70627
AT1G21200.1	1.716	0.234661	0.373126	0.74012
AT2G27950.1	1.633	0.269409	0.365732	0.681771
AT5G01390.2	2.042	0.219264	0.385569	0.772441
AT2G36620.1	1.745	0.351397	0.379348	0.585021
AT3G06350.1	1.742	0.267814	0.365804	0.683203
AT2G35620.1	1.966	0.231546	0.3719	0.74262
AT5G53730.1	2.305	0.230424	0.383319	0.753329
AT2G28840.1	1.553	0.318226	0.365591	0.613022
AT1G18590.1	2.225	0.237845	0.392655	0.750471
AT2G28840.2	1.587	0.305517	0.366055	0.630625
AT5G08139.1	1.638	0.250538	0.370233	0.713933
AT2G41170.1	2.054	0.2383	0.381392	0.740865
AT2G04790.3	1.694	0.195647	0.375686	0.804198
AT2G04790.2	1.687	0.206955	0.37799	0.788101
AT1G21750.2	2.008	0.310638	0.366332	0.620763
AT2G43020.1	2.132	0.251832	0.385642	0.724522
AT1G26090.1	2.421	0.198082	0.38207	0.802227
AT5G41520.1	1.33	0.331129	0.361326	0.591248
AT5G41520.2	1.344	0.33104	0.362233	0.592489
AT5G12200.1	1.553	0.265316	0.365606	0.686851
AT4G19170.1	2.516	0.228288	0.392729	0.766012
AT4G25280.1	2.241	0.268441	0.379813	0.692573
AT4G22690.1	1.73	0.273238	0.370035	0.679766
AT3G17800.2	1.631	0.267694	0.369919	0.689733
AT4G24090.1	1.499	0.327979	0.365559	0.60104
AT3G17800.1	1.618	0.276195	0.369196	0.676025
AT1G77670.1	1.693	0.272582	0.371435	0.682243
AT4G12900.1	1.935	0.264278	0.375748	0.697756
AT4G17310.2	2.221	0.224118	0.398883	0.775757
AT1G08770.1	1.889	0.238614	0.392024	0.750888
AT3G47680.1	2.404	0.248554	0.379369	0.721711
AT2G01570.1	1.87	0.264885	0.378581	0.700694
AT2G45960.2	1.579	0.316857	0.371771	0.623136
AT3G12170.1	1.664	0.241426	0.376743	0.732722
AT3G49730.1	1.714	0.281474	0.362574	0.658372
AT1G20780.1	2.16	0.228446	0.38331	0.757003
AT2G45960.1	1.526	0.345347	0.369213	0.582289
AT1G09010.1	1.928	0.266201	0.3661	0.686453
AT1G58290.1	1.701	0.271469	0.367005	0.682272
AT3G06740.1	1.514	0.263481	0.359656	0.68463
AT5G05860.1	1.668	0.252153	0.367021	0.709106
AT3G15260.2	1.817	0.267022	0.36981	0.687047
AT2G46680.2	1.65	0.334123	0.369603	0.594646
AT3G43980.1	1.701	0.297049	0.376066	0.652048
AT3G60410.3	2.119	0.244376	0.381377	0.732892
AT2G19680.2	1.791	0.271874	0.376657	0.690283
AT2G17840.1	1.969	0.32977	0.360049	0.586398
AT2G01640.1	1.712	0.26078	0.382033	0.7105
AT1G11630.1	1.939	0.242757	0.37369	0.726721
AT5G07440.1	1.687	0.250032	0.371069	0.716204
AT4G14040.1	1.693	0.27891	0.369351	0.670536
AT5G07440.3	1.947	0.198294	0.370998	0.794861
AT5G07440.2	1.667	0.263441	0.372573	0.697002
AT3G18680.1	1.843	0.333985	0.370525	0.597239
AT1G64490.1	1.74	0.277605	0.383015	0.68712
AT1G52320.3	1.786	0.247894	0.369941	0.719193
AT1G03410.1	1.92	0.229951	0.371574	0.746866
AT1G32415.1	2.28	0.179479	0.379483	0.832176
AT3G08510.1	1.971	0.340509	0.370748	0.588307
AT1G68300.1	1.589	0.273768	0.373549	0.684514
AT1G70520.1	1.787	0.287507	0.374038	0.662855
AT5G64070.1	2.24	0.2695	0.367432	0.68086
AT1G04240.1	2.139	0.289357	0.372302	0.655772
AT1G01510.1	1.818	0.256012	0.36861	0.70356
AT4G17085.1	1.559	0.235484	0.391956	0.7517
AT3G08510.3	1.682	0.324701	0.371854	0.611243
AT5G19530.1	2.173	0.246129	0.388267	0.734938
AT2G34560.2	1.596	0.269472	0.368917	0.686589
AT2G34560.1	1.582	0.271776	0.36842	0.682922
AT1G17210.1	1.945	0.266891	0.372256	0.688954
AT2G32710.2	2.015	0.224125	0.390975	0.76906
AT3G28160.1	2.058	0.242871	0.368178	0.723726
AT2G32710.1	1.851	0.221293	0.387295	0.770781
AT3G14172.1	1.991	0.274161	0.373119	0.68046
AT1G12430.1	1.967	0.258992	0.377246	0.706264
AT5G11840.1	1.854	0.289433	0.368245	0.652863
AT4G29430.1	1.943	0.291713	0.390775	0.671281
AT1G24793.1	1.911	0.267965	0.383108	0.700482
AT1G24793.2	1.707	0.260647	0.376573	0.705114
AT5G44450.1	1.836	0.253798	0.373122	0.710923
AT5G44190.1	1.671	0.265895	0.366414	0.687829
AT2G32730.1	1.63	0.281916	0.366468	0.66414
AT1G11360.2	1.585	0.254067	0.373911	0.714498
AT4G23570.2	1.454	0.243883	0.358302	0.712272
AT4G23570.3	1.502	0.241049	0.360763	0.718629
AT2G31810.2	1.717	0.3254	0.379092	0.617834
AT4G23570.1	1.459	0.243226	0.359397	0.7147
AT5G17020.2	1.885	0.236261	0.373531	0.737807
AT1G72030.1	1.59	0.248032	0.371282	0.719559
AT5G57880.1	2.579	0.155286	0.416098	0.885499
AT4G26270.1	1.707	0.253049	0.3703	0.711247
AT5G65440.3	1.948	0.22973	0.377357	0.753209
AT1G05230.3	1.755	0.232174	0.371797	0.743263
AT3G07360.2	1.87	0.260673	0.367518	0.695522
AT3G07360.3	1.857	0.261894	0.366136	0.692015
AT3G07360.1	1.864	0.264686	0.367154	0.688805
AT3G21200.1	1.67	0.271447	0.367903	0.676822
AT1G67325.2	1.858	0.217172	0.372973	0.768922
AT1G67325.1	1.731	0.261531	0.375876	0.701737
AT2G27330.1	1.586	0.235256	0.366297	0.731555
AT1G73110.1	1.852	0.264179	0.369089	0.693321
AT5G49760.1	1.946	0.248892	0.376522	0.72377
AT4G25360.1	2.313	0.213984	0.379024	0.777179
AT4G25360.2	2.317	0.207913	0.377162	0.785271
AT1G71860.2	1.53	0.246726	0.362707	0.713907
AT1G71860.3	1.803	0.236461	0.365161	0.731711
AT1G71860.1	1.765	0.253979	0.366395	0.705813
AT3G06868.1	1.853	0.236503	0.378503	0.743248
AT4G00300.2	1.859	0.255333	0.372761	0.712531
AT1G61450.1	1.642	0.246642	0.372209	0.720753
AT3G47000.1	1.738	0.277623	0.370112	0.671704
AT3G63190.1	1.421	0.330524	0.361054	0.590954
AT2G46690.1	1.398	0.237799	0.358216	0.721525
AT2G39990.1	1.807	0.252801	0.359434	0.700641
AT3G54670.3	1.945	0.302204	0.368846	0.63538
AT1G63460.1	1.484	0.241506	0.367175	0.723832
AT1G10820.2	1.741	0.237402	0.379783	0.742244
AT4G18810.2	1.862	0.285373	0.371948	0.664147
AT5G39830.1	1.522	0.261275	0.36453	0.69331
AT5G39830.2	1.618	0.255929	0.366535	0.703336
AT4G32260.1	1.441	0.298672	0.359339	0.631747
AT1G59900.1	1.533	0.330213	0.362358	0.592648
AT2G43235.1	1.961	0.228881	0.373028	0.750114
AT1G06780.1	2.184	0.23729	0.381251	0.743171
AT5G47890.1	1.511	0.353516	0.363927	0.563207
AT1G63980.2	1.586	0.330896	0.363392	0.592427
AT2G34357.1	2.569	0.23205	0.375542	0.745963
AT3G01090.3	1.914	0.247586	0.376449	0.725259
AT4G32720.1	1.769	0.323321	0.367229	0.605372
AT4G23820.1	1.575	0.320042	0.365977	0.610917
AT2G47980.1	2.055	0.26145	0.375953	0.701363
AT4G32720.2	1.791	0.309176	0.370844	0.62962
AT3G49645.1	1.945	0.235737	0.384373	0.746058
AT3G56990.1	1.797	0.262621	0.369079	0.691692
AT5G62200.1	1.72	0.25462	0.371334	0.70967
AT4G01560.1	2.051	0.267514	0.373524	0.685973
AT3G57870.1	1.468	0.269366	0.351235	0.663818
AT5G25780.1	1.605	0.274124	0.365851	0.674424
AT1G54060.1	1.682	0.282963	0.376994	0.67512
AT3G55270.1	2.133	0.228003	0.374596	0.751545
AT3G62010.1	2.096	0.280693	0.377543	0.675228
AT1G53890.3	2.395	0.185888	0.399371	0.833049
AT1G56045.1	1.936	0.320615	0.379206	0.619551
AT1G53890.2	2.352	0.192305	0.392456	0.817984
AT3G12010.1	1.968	0.211252	0.373406	0.776547
AT5G15870.1	1.914	0.23706	0.370446	0.733385
AT4G26710.2	1.715	0.293529	0.375312	0.655277
AT5G55160.1	1.354	0.322582	0.364343	0.606731
AT1G53890.1	2.143	0.239871	0.402017	0.755645
AT5G55160.2	1.395	0.285791	0.368357	0.664218
AT1G62430.1	1.806	0.210132	0.371969	0.777609
AT2G02930.1	2.385	0.186239	0.373953	0.815729
AT1G30260.1	1.641	0.274447	0.361882	0.666465
AT4G27230.1	1.546	0.285043	0.367449	0.66059
AT4G27230.2	1.81	0.270351	0.380136	0.696194
AT1G79820.4	2.573	0.20678	0.395952	0.798777
AT5G16290.1	1.706	0.271225	0.371022	0.68279
AT1G79820.3	2.506	0.223024	0.395843	0.773767
AT4G15690.1	1.854	0.236589	0.392933	0.754385
AT5G53340.2	1.931	0.27754	0.374402	0.679241
AT1G64142.1	1.671	0.294933	0.363187	0.639024
AT4G34370.2	1.794	0.231883	0.370273	0.744296
AT1G51980.2	1.784	0.28543	0.371037	0.661771
AT3G05560.3	1.502	0.259773	0.363035	0.695577
AT5G18230.2	1.775	0.29069	0.366975	0.652559
AT5G18230.1	1.782	0.291304	0.36734	0.65198
AT1G55690.3	1.841	0.254861	0.380563	0.717434
AT5G64940.2	1.585	0.297597	0.364788	0.639798
AT5G64940.1	1.575	0.299967	0.364458	0.636097
AT2G27385.2	2.203	0.231741	0.374964	0.748719
AT2G27385.3	2.203	0.231715	0.375064	0.748906
AT2G27385.1	1.993	0.340467	0.371761	0.585464
AT4G28440.1	1.564	0.277058	0.366096	0.667226
AT1G26880.1	1.923	0.323974	0.375331	0.609739
AT1G26880.2	1.817	0.291003	0.377131	0.661205
AT5G45100.1	1.642	0.278869	0.37256	0.675098
AT3G56480.1	1.719	0.263243	0.364495	0.688234
AT1G78630.1	1.879	0.348392	0.366616	0.572305
AT1G65845.1	1.737	0.255705	0.392311	0.723151
AT5G21170.1	1.873	0.270319	0.371541	0.685684
AT4G00740.1	1.892	0.238787	0.379292	0.740819
AT4G30160.1	1.995	0.245442	0.371765	0.722838
AT2G44530.2	1.959	0.289104	0.365083	0.649917
AT2G44530.1	1.947	0.290371	0.364064	0.646935
AT5G40670.1	1.882	0.264087	0.369211	0.691022
AT2G42160.1	1.886	0.251408	0.365144	0.706655
AT1G05850.1	1.508	0.376117	0.362605	0.535751
AT3G47670.1	2.055	0.22787	0.368149	0.747651
AT5G53340.1	1.94	0.268621	0.374935	0.692982
AT2G20630.2	1.69	0.266137	0.373363	0.696537
AT5G28330.1	2.23	0.17066	0.385496	0.848997
AT2G20630.1	1.605	0.335214	0.371023	0.596561
AT2G21160.1	1.719	0.310626	0.368138	0.622465
AT2G21160.2	1.446	0.292807	0.372029	0.656329
AT2G25520.1	1.924	0.264891	0.377304	0.699146
AT1G32240.1	1.646	0.20731	0.367983	0.779794
AT5G04740.2	1.612	0.220393	0.360121	0.751433
AT5G04740.1	1.582	0.266121	0.366833	0.686734
AT3G06580.1	1.648	0.270706	0.360809	0.672805
AT3G10350.1	1.628	0.243757	0.367778	0.724919
AT1G21770.1	1.409	0.282676	0.36444	0.662461
AT1G64670.1	1.545	0.239324	0.365751	0.72712
AT1G31070.2	1.625	0.281783	0.362513	0.659334
AT5G61020.2	1.66	0.332041	0.368515	0.596068
AT5G45060.1	1.984	0.216664	0.371443	0.767027
AT1G77810.1	1.788	0.234738	0.372742	0.740328
AT3G11710.1	1.768	0.330521	0.367339	0.597322
AT1G77810.2	1.703	0.253694	0.372505	0.711085
AT5G42070.1	1.604	0.265964	0.376329	0.696439
AT3G50550.1	2.027	0.274879	0.373681	0.671357
AT3G11770.1	2.53	0.220923	0.404237	0.776659
AT1G64650.2	1.971	0.259961	0.378703	0.705844
AT1G59980.1	2.215	0.194127	0.391384	0.814552
AT1G03630.1	1.529	0.32626	0.359458	0.59224
AT3G03870.2	2.189	0.210021	0.373534	0.777739
AT3G03870.1	2.118	0.220128	0.374852	0.762909
AT5G66140.1	1.491	0.254995	0.363758	0.700932
AT2G17230.1	1.597	0.271092	0.356909	0.667007
AT3G53668.1	1.582	0.229437	0.374063	0.750952
AT4G21090.3	1.626	0.235758	0.367203	0.73675
AT4G21090.2	1.626	0.240484	0.365358	0.726689
AT4G21090.1	1.626	0.239598	0.365744	0.728589
AT4G27840.1	1.837	0.214872	0.370022	0.769323
AT2G47250.1	1.852	0.24266	0.36872	0.724012
AT2G28940.2	1.572	0.235507	0.367353	0.734314
AT3G53740.3	1.557	0.377397	0.368128	0.538988
AT5G64460.8	1.529	0.289178	0.367593	0.654739
AT5G35590.1	1.778	0.315329	0.372717	0.622115
AT4G11010.1	1.617	0.325067	0.371782	0.610833
AT5G11310.1	1.747	0.215127	0.368246	0.768075
AT1G29530.1	1.614	0.237248	0.358425	0.719943
AT5G09230.1	2.196	0.24698	0.393091	0.736784
AT5G48760.1	1.615	0.315069	0.367494	0.61785
AT3G04020.1	1.63	0.271461	0.371557	0.685684
AT5G48760.2	1.629	0.310564	0.367872	0.62452
AT1G43710.1	2.003	0.2898	0.376692	0.662013
AT4G31010.1	1.624	0.252466	0.374287	0.714348
AT2G44525.1	1.77	0.243294	0.376662	0.729969
AT1G74850.1	1.622	0.303316	0.363542	0.629439
AT3G53740.2	1.567	0.371237	0.37426	0.554609
AT3G51640.2	1.654	0.236646	0.368089	0.734404
AT5G47180.1	1.702	0.272354	0.366158	0.677652
AT5G47180.2	1.715	0.275243	0.365358	0.671962
AT3G51640.1	1.821	0.262974	0.369254	0.695526
AT3G63510.2	2.052	0.233368	0.386327	0.752329
AT5G50580.1	1.765	0.263618	0.373021	0.696002
AT5G50580.2	1.654	0.264068	0.363871	0.686763
AT5G38895.1	2.232	0.203415	0.388264	0.798266
AT1G60190.1	1.578	0.259094	0.362286	0.695835
AT1G22400.1	1.789	0.306585	0.370203	0.628686
AT1G20020.2	1.517	0.381288	0.363596	0.531989
AT3G50550.2	2.29	0.261047	0.403552	0.71278
AT4G39970.1	1.717	0.241269	0.372852	0.730643
AT5G13560.1	1.563	0.236623	0.362268	0.730431
AT1G20020.3	1.489	0.393515	0.357789	0.510431
AT5G05360.2	1.861	0.229277	0.385655	0.761089
AT3G59990.3	1.58	0.283021	0.365749	0.658804
AT5G05360.1	1.821	0.265111	0.391085	0.711486
AT5G10980.1	1.489	0.299363	0.359471	0.630595
AT4G28100.1	1.735	0.244803	0.374543	0.726331
AT2G23290.1	1.601	0.304816	0.361623	0.619948
AT1G56610.2	2.461	0.172084	0.398636	0.852835
AT1G22640.1	2.282	0.247596	0.382832	0.727526
AT3G44340.1	1.886	0.260401	0.374811	0.702568
AT3G44340.2	1.935	0.250788	0.374085	0.71648
AT2G29530.2	1.507	0.312891	0.357153	0.609298
AT5G40610.1	1.507	0.240851	0.359272	0.71781
AT1G16635.1	6.691	0.173784	0.756759	0.954558
AT4G08980.3	1.909	0.289337	0.374922	0.661152
AT4G29070.1	1.544	0.269695	0.369974	0.686894
AT4G30190.1	2.003	0.313192	0.371015	0.621581
AT4G30190.2	2.022	0.307985	0.371812	0.630104
AT2G20230.1	1.76	0.24441	0.370441	0.724176
AT1G06510.1	2.066	0.248612	0.366612	0.710871
AT3G13480.1	1.764	0.318931	0.378982	0.624567
AT2G32520.1	1.55	0.276743	0.366897	0.672739
AT2G36160.1	1.433	0.331097	0.353458	0.578783
AT5G19450.1	1.57	0.303554	0.365059	0.630477
AT1G55980.1	1.671	0.221829	0.37253	0.761719
AT2G38650.2	2.335	0.278278	0.368712	0.667954
AT5G46730.1	1.407	0.349815	0.358878	0.560847
AT5G46730.2	1.567	0.347594	0.363253	0.568198
AT3G09070.1	2.013	0.26606	0.373834	0.691201
AT1G80030.1	2.166	0.294547	0.369911	0.644916
AT1G56510.1	2.15	0.225278	0.386215	0.763637
AT5G25560.4	2.07	0.244057	0.372984	0.725172
AT1G80030.2	2.186	0.286798	0.36963	0.655735
AT5G25560.2	1.828	0.253812	0.365937	0.704026
AT3G54810.1	1.617	0.264225	0.362941	0.685773
AT3G54810.2	1.554	0.289701	0.358894	0.642972
AT5G25560.1	1.818	0.254791	0.364654	0.701142
AT3G22630.1	1.754	0.257852	0.381631	0.71338
AT2G31360.1	1.538	0.307504	0.36621	0.62796
AT5G09250.2	1.682	0.217113	0.364505	0.76151
AT2G32970.2	1.868	0.213629	0.377637	0.778746
AT5G09250.1	1.689	0.251178	0.362731	0.70174
AT1G18840.1	1.73	0.224544	0.365649	0.751093
AT1G20950.1	1.765	0.287305	0.37484	0.663232
AT1G18840.2	1.724	0.225572	0.365215	0.748815
AT1G78660.3	2.084	0.243269	0.382037	0.733289
AT1G78660.2	2.057	0.241503	0.38364	0.738806
AT1G78660.1	2.052	0.2509	0.381698	0.72135
AT1G78610.1	2.093	0.26602	0.372534	0.689833
AT1G80010.1	2.067	0.250088	0.373302	0.716604
AT2G36420.1	1.674	0.299368	0.357884	0.624079
AT3G22310.1	1.864	0.295804	0.373556	0.652244
AT4G08980.5	1.843	0.327846	0.374881	0.607373
AT1G62570.1	1.642	0.29127	0.362684	0.643627
AT1G74740.1	1.962	0.239084	0.374935	0.734284
AT4G11211.1	2.354	0.173234	0.408452	0.856526
AT1G60000.2	1.484	0.235049	0.366594	0.738597
AT5G50340.1	1.965	0.218088	0.37397	0.768069
AT4G02820.1	2.067	0.225134	0.384138	0.761523
AT1G68660.2	1.436	0.284443	0.36924	0.66332
AT1G68660.1	1.443	0.30584	0.374429	0.638572
AT1G02380.1	1.868	0.233816	0.379203	0.747423
AT1G76780.1	1.598	0.339132	0.371308	0.590625
AT1G10900.1	1.83	0.244202	0.370149	0.723823
AT4G22190.1	1.69	0.261931	0.369409	0.697692
AT3G06700.2	1.663	0.357878	0.380163	0.576322
AT4G14410.2	1.855	0.275763	0.365867	0.670425
AT4G14410.1	1.933	0.248376	0.369333	0.717043
AT5G55300.1	1.729	0.292054	0.363884	0.644581
AT3G45140.1	1.823	0.372234	0.354177	0.526694
AT5G55300.3	1.804	0.273265	0.365132	0.673631
AT5G55300.2	1.773	0.289211	0.365044	0.649294
AT4G12880.2	1.602	0.220099	0.363002	0.756564
AT4G33865.1	1.461	0.295082	0.358503	0.632926
AT4G12880.1	1.569	0.25477	0.371017	0.708873
AT3G63170.1	2.211	0.252587	0.377524	0.715678
AT5G56150.2	1.907	0.303077	0.371724	0.636099
AT5G61530.1	1.721	0.271921	0.368144	0.680041
AT1G23052.1	1.76	0.219218	0.374668	0.768037
AT2G43550.1	1.851	0.290443	0.378815	0.664463
AT5G42940.1	1.826	0.227518	0.370391	0.745006
AT1G15130.1	1.566	0.280099	0.364608	0.665151
AT3G02750.1	2.49	0.21466	0.384506	0.778504
AT5G58440.1	1.753	0.300476	0.370733	0.640325
AT3G13740.2	1.634	0.242463	0.359881	0.716813
AT3G27560.1	1.954	0.208284	0.378601	0.787686
AT4G13020.4	1.58	0.245684	0.364496	0.71735
AT1G25380.1	1.631	0.263875	0.364737	0.687089
AT5G28450.1	1.385	0.234839	0.365762	0.73965
AT3G53370.1	1.667	0.253882	0.382886	0.721283
AT3G53370.2	1.686	0.229824	0.37973	0.754332
AT2G04030.2	1.646	0.355365	0.361495	0.55798
AT2G04030.1	1.628	0.359598	0.360559	0.551605
AT2G40950.1	1.84	0.24105	0.368551	0.726713
AT5G08180.2	1.796	0.257753	0.370741	0.704197
AT2G01720.1	2.045	0.288034	0.37614	0.665243
AT3G04120.1	1.679	0.311113	0.368485	0.625531
AT5G64760.1	1.947	0.227524	0.379836	0.755724
AT4G25640.2	1.827	0.251244	0.371043	0.714464
AT3G48070.2	1.459	0.239567	0.35969	0.722642
AT3G48070.1	1.494	0.244499	0.360173	0.714268
AT4G25640.1	1.812	0.273288	0.373324	0.683056
AT1G79520.2	1.971	0.254288	0.37791	0.714284
AT1G79520.1	1.989	0.267326	0.37849	0.693916
AT1G11400.2	1.557	0.298015	0.358481	0.629567
AT2G39725.2	1.986	0.23526	0.380312	0.746315
[truncated: 14,874 more rows]

## Sheet: R3
R3 Root Control Whole Transcript Derived Reactivity Statistics
transcript	Root_Control_Max	Root_Control_Average	Root_Control_SD	Root_Control_Gini
AT1G73350.3	1.859	0.270736	0.377144	0.69076
AT3G44680.1	2.761	0.226108	0.387866	0.762186
AT2G14880.1	1.434	0.248622	0.364565	0.712951
AT3G19760.1	1.94	0.326296	0.359514	0.587493
AT2G12280.1	2.113	0.184668	0.370358	0.816505
AT3G20960.1	2.324	0.246795	0.377041	0.724898
AT2G22190.1	1.536	0.291911	0.367596	0.650847
AT5G62000.3	1.683	0.316302	0.366944	0.614407
AT1G08650.2	1.659	0.286781	0.372603	0.665313
AT3G11130.1	1.924	0.313089	0.367902	0.618007
AT3G09860.1	1.981	0.335993	0.373924	0.590279
AT1G04440.1	1.53	0.273894	0.357753	0.664072
AT5G13090.1	1.995	0.253512	0.374979	0.71233
AT4G30810.1	1.865	0.264258	0.385757	0.708352
AT3G10680.1	1.484	0.313761	0.361259	0.612756
AT3G60530.1	1.985	0.271762	0.363917	0.674416
AT2G41600.4	1.513	0.227128	0.372186	0.751903
AT1G31730.1	1.739	0.292882	0.364319	0.643462
AT5G06630.1	1.4	0.35594	0.363486	0.562278
AT2G41600.3	1.501	0.239425	0.370098	0.731115
AT5G19540.1	1.944	0.214847	0.376948	0.774009
AT2G41600.1	1.63	0.206614	0.369389	0.781165
AT5G23830.2	1.631	0.263052	0.380848	0.708068
AT1G21160.1	1.915	0.272337	0.373646	0.683279
AT3G11500.1	1.837	0.31815	0.376611	0.621309
AT1G24300.1	2.171	0.256895	0.383233	0.714422
AT1G72370.2	1.563	0.40278	0.358824	0.49907
AT1G72370.1	1.572	0.420942	0.351691	0.47125
AT1G18490.1	2.081	0.183312	0.36779	0.819205
AT1G68920.1	1.714	0.246902	0.37606	0.725529
AT5G19550.1	1.887	0.311457	0.372821	0.628733
AT3G19930.1	1.851	0.308383	0.370382	0.625818
AT5G42146.1	1.738	0.220813	0.372894	0.759261
AT1G67750.1	1.652	0.279641	0.368578	0.666736
AT3G23900.1	1.987	0.286407	0.37125	0.659879
AT1G74660.1	1.537	0.281285	0.34848	0.639432
AT5G47540.1	1.991	0.267115	0.37748	0.694477
AT2G02370.2	2.092	0.196598	0.385092	0.809746
AT2G02370.1	2.135	0.198457	0.386038	0.807072
AT5G64840.1	1.862	0.272837	0.370998	0.678863
AT3G23990.1	1.65	0.339876	0.358691	0.571995
AT1G52720.1	1.761	0.283816	0.369023	0.663065
AT3G09720.1	1.941	0.231696	0.377711	0.749035
AT1G56000.1	1.831	0.240029	0.381442	0.739299
AT5G22070.1	1.767	0.203227	0.366182	0.785735
AT1G17080.1	1.835	0.313858	0.369309	0.616597
AT2G05710.1	1.655	0.311101	0.360605	0.6129
AT3G19740.1	1.897	0.256626	0.37774	0.710381
AT4G23760.1	1.783	0.226804	0.388773	0.76679
AT3G59940.1	1.962	0.262369	0.373355	0.696721
AT5G61412.1	1.419	0.257435	0.377664	0.711391
AT1G24490.2	1.814	0.244623	0.377757	0.730726
AT5G08120.1	1.735	0.283128	0.368928	0.664528
AT3G54110.1	2.013	0.307797	0.37983	0.641127
AT4G24760.1	1.858	0.274501	0.362917	0.667744
AT1G22360.1	1.602	0.29372	0.370538	0.651361
AT5G53350.1	1.906	0.28742	0.368829	0.651947
AT1G22360.2	1.622	0.281023	0.370292	0.669615
AT4G37190.1	1.864	0.23654	0.378879	0.744173
AT5G22050.2	1.395	0.271818	0.356753	0.666933
AT5G22050.1	1.428	0.246476	0.359468	0.710817
AT4G37190.2	1.82	0.234859	0.376754	0.745446
AT1G68920.3	1.71	0.245905	0.376012	0.727602
AT3G54130.1	1.864	0.245015	0.378852	0.731739
AT5G49460.1	1.863	0.269446	0.370051	0.683119
AT3G47965.1	1.794	0.280996	0.369705	0.659977
AT1G46480.1	1.676	0.245321	0.364375	0.716632
AT2G26190.1	1.767	0.289024	0.35929	0.643084
AT4G32330.3	1.705	0.327951	0.355034	0.580911
AT1G74920.2	1.789	0.325025	0.355887	0.587845
AT4G32330.1	1.709	0.315154	0.354124	0.596749
AT4G24275.1	1.811	0.289288	0.375255	0.663508
AT1G75800.1	1.705	0.328336	0.357427	0.583823
AT4G33880.1	2.014	0.217437	0.368867	0.76507
AT3G24520.1	1.855	0.242028	0.364662	0.72302
AT4G14230.1	1.902	0.250876	0.380855	0.72272
AT4G32070.1	1.793	0.300837	0.361636	0.6268
AT1G16530.1	1.378	0.236828	0.3585	0.72512
AT2G03680.1	2.144	0.356527	0.385225	0.578953
AT1G44780.1	1.507	0.303173	0.36514	0.632028
AT2G20020.1	2.15	0.231813	0.381644	0.752037
AT3G01180.1	1.962	0.243722	0.380385	0.733605
AT1G33060.1	1.9	0.230275	0.371265	0.746352
AT1G33060.2	1.977	0.232141	0.372765	0.744484
AT2G18050.1	1.341	0.281883	0.359963	0.65737
AT4G36740.1	1.51	0.252501	0.377521	0.718963
AT2G18050.2	1.328	0.272469	0.359333	0.671397
AT1G75750.1	1.512	0.326892	0.354486	0.581593
AT1G75750.2	1.494	0.30022	0.351929	0.618476
AT1G13530.1	1.714	0.262545	0.37001	0.692431
AT5G21990.1	1.954	0.278013	0.377406	0.678479
AT1G66660.2	2.309	0.239896	0.375129	0.733334
AT5G64810.1	1.391	0.240674	0.365611	0.726311
AT5G42150.1	2.311	0.269402	0.397428	0.708244
AT3G48210.1	1.644	0.238888	0.370151	0.732945
AT2G34200.1	2.069	0.2692	0.378399	0.688881
AT2G33120.2	1.575	0.267151	0.358742	0.677526
AT2G33120.3	1.685	0.239327	0.362383	0.724063
AT2G33120.1	1.567	0.279247	0.35644	0.655732
AT3G01420.1	1.71	0.255827	0.36982	0.707468
AT1G75260.1	1.663	0.275361	0.36074	0.666796
AT5G59380.1	1.78	0.299182	0.372695	0.642674
AT1G54210.2	2.231	0.214641	0.393889	0.788249
AT5G41970.1	1.875	0.27825	0.377013	0.67688
AT4G22240.1	1.731	0.239167	0.366388	0.728265
AT4G17560.1	1.851	0.216737	0.378327	0.774256
AT3G08947.1	2.043	0.222958	0.381542	0.763787
ATCG01240.1	1.673	0.23695	0.384879	0.748191
AT1G18150.2	2.454	0.243283	0.382578	0.735895
AT5G59000.1	2.974	0.177134	0.401206	0.847871
AT1G31935.1	1.744	0.278969	0.36825	0.666638
AT3G13610.1	1.77	0.304482	0.371094	0.637182
AT1G06850.2	1.885	0.226735	0.372613	0.751394
AT3G55660.1	1.728	0.243982	0.38268	0.731695
AT5G01650.1	1.716	0.259205	0.373129	0.701423
AT2G41600.2	1.556	0.215929	0.368001	0.76519
AT3G13120.2	1.374	0.231435	0.36014	0.737674
AT4G27370.1	2.542	0.187227	0.375711	0.815409
AT5G59890.1	1.805	0.293289	0.378811	0.658441
AT5G65960.1	1.937	0.294711	0.366335	0.64272
AT2G35840.3	1.631	0.203804	0.366948	0.785182
AT2G35840.2	1.572	0.220833	0.369587	0.758549
AT2G35840.1	1.555	0.226069	0.369924	0.750547
AT2G33810.1	1.481	0.234475	0.363294	0.734692
AT5G36290.1	1.601	0.26872	0.3723	0.69129
AT5G36290.2	1.606	0.260218	0.369962	0.70138
AT4G30260.1	1.861	0.265909	0.380284	0.69995
AT4G16180.2	1.597	0.292077	0.368592	0.650605
AT4G16180.1	1.632	0.214177	0.363646	0.766134
AT4G38740.1	1.554	0.399701	0.356109	0.497551
AT3G20410.1	1.883	0.304076	0.358505	0.619416
AT2G36000.1	1.735	0.216444	0.367349	0.764307
AT5G37510.1	1.841	0.303417	0.369455	0.634331
AT5G37510.2	1.848	0.298623	0.369935	0.641734
AT5G65940.1	2.228	0.294869	0.381134	0.650747
AT5G65940.2	2.179	0.29451	0.377804	0.650409
AT5G65940.3	1.875	0.283909	0.374578	0.662929
AT1G17680.1	1.962	0.270674	0.373872	0.686367
AT1G06160.1	1.602	0.207618	0.373503	0.784302
AT2G22860.1	1.43	0.280709	0.362133	0.661002
AT5G23830.1	1.473	0.293302	0.373445	0.656253
AT5G55960.1	2.04	0.222135	0.370759	0.758847
AT5G22875.1	1.618	0.23547	0.369085	0.736293
AT1G05150.1	1.773	0.288464	0.374489	0.661981
AT5G04440.1	2.157	0.249672	0.382116	0.720964
AT5G20180.1	1.554	0.229232	0.370655	0.74583
AT3G47060.1	2.033	0.263262	0.38347	0.707663
AT1G65440.1	2.097	0.34101	0.361948	0.573985
AT3G63500.1	1.663	0.306447	0.358661	0.617507
AT5G04420.2	2.064	0.27778	0.375669	0.675062
AT5G04420.3	2.127	0.25798	0.376237	0.70592
AT5G04420.1	2.077	0.270068	0.374215	0.685181
AT3G63500.2	1.668	0.312658	0.35865	0.609132
AT5G65790.1	1.502	0.298914	0.356781	0.627138
AT3G46000.1	1.91	0.290811	0.367522	0.648508
AT3G25585.4	1.82	0.245582	0.369289	0.721199
AT1G19310.1	1.952	0.242507	0.383576	0.73834
AT4G31990.3	1.93	0.289084	0.368782	0.65401
AT4G13030.1	1.778	0.260445	0.381745	0.709443
AT4G13030.2	1.783	0.255152	0.381503	0.717213
AT5G28770.3	1.637	0.288461	0.370419	0.657587
AT4G32400.1	1.773	0.283861	0.369552	0.658988
AT3G02065.2	1.878	0.23308	0.369433	0.739474
AT3G17120.1	1.824	0.22789	0.367896	0.748415
AT4G24830.1	1.66	0.285894	0.372294	0.664383
AT3G02065.1	1.989	0.220671	0.372687	0.761745
AT5G42390.1	1.791	0.253129	0.374205	0.714239
AT5G50120.1	2.104	0.258096	0.384848	0.713123
AT5G60390.2	1.968	0.401547	0.354729	0.494109
AT4G04470.1	1.671	0.282009	0.37377	0.668966
AT3G07790.1	1.529	0.27314	0.364264	0.673329
AT5G60390.1	1.99	0.418247	0.35256	0.473485
AT1G17455.2	1.916	0.185694	0.361641	0.810395
AT3G10260.3	1.829	0.243074	0.376883	0.73438
AT1G17455.1	1.792	0.212478	0.365952	0.771668
AT3G18960.1	1.621	0.213574	0.366003	0.767352
AT4G08190.1	1.898	0.135229	0.371315	0.895341
AT1G11260.1	1.857	0.313662	0.357835	0.600318
AT1G64750.2	1.421	0.346202	0.357454	0.563117
AT1G64750.3	1.566	0.257442	0.37716	0.714773
AT3G25530.1	1.772	0.315962	0.363904	0.611933
AT1G64750.1	1.431	0.371511	0.361876	0.537919
AT5G48180.1	1.468	0.33063	0.354064	0.580222
AT5G10610.1	1.834	0.221613	0.375855	0.760948
AT2G42190.1	1.507	0.311201	0.365274	0.619515
AT3G18900.1	1.724	0.238741	0.381291	0.742058
AT3G09440.1	1.76	0.322565	0.36914	0.609474
AT5G49660.1	1.903	0.233485	0.373846	0.744202
AT3G09440.2	1.754	0.32878	0.369009	0.600857
AT5G16680.1	1.641	0.288683	0.366733	0.652991
AT2G34300.2	1.715	0.336231	0.356015	0.573934
AT2G34300.1	1.723	0.33442	0.357444	0.577784
AT1G69840.7	1.731	0.221917	0.368797	0.758176
AT3G25150.1	1.728	0.326582	0.365766	0.598474
AT1G21580.1	2.018	0.226625	0.375291	0.753285
AT3G02790.1	1.391	0.296698	0.358786	0.632458
AT1G72850.1	2.147	0.209683	0.378165	0.781014
AT1G48650.1	2.054	0.227911	0.374867	0.751375
AT4G14920.1	1.944	0.244626	0.378193	0.729266
AT1G48650.2	2.148	0.221266	0.378349	0.764133
AT5G36710.1	1.737	0.250077	0.372055	0.715658
AT2G22450.1	1.921	0.279023	0.375095	0.674745
AT5G49510.2	1.86	0.257455	0.374463	0.704778
AT5G15600.1	1.815	0.224308	0.377216	0.759684
AT5G58100.1	1.697	0.273441	0.368896	0.677991
AT2G18960.1	1.706	0.344264	0.357868	0.564542
AT5G27520.1	1.649	0.239484	0.371128	0.729304
AT1G66430.1	1.72	0.280144	0.375299	0.6761
AT5G02500.2	1.708	0.36061	0.357167	0.543465
AT5G02500.1	1.774	0.372484	0.35817	0.530901
AT1G56460.2	2.082	0.277156	0.370507	0.673069
AT1G01770.1	2.098	0.217233	0.379469	0.771999
AT5G25100.1	1.84	0.296253	0.362421	0.636211
AT5G25100.2	1.894	0.282803	0.366298	0.660681
AT3G19360.1	2.074	0.232364	0.389535	0.755525
AT2G36060.1	2.073	0.261714	0.38663	0.711997
AT2G36060.2	2.18	0.267725	0.39667	0.711392
AT2G36060.3	2.098	0.25953	0.386073	0.715787
AT1G70810.1	1.739	0.264259	0.383329	0.707153
AT1G72170.1	1.342	0.263573	0.363586	0.690639
AT3G24530.1	1.656	0.244664	0.366513	0.718097
AT1G53180.1	2.256	0.27762	0.374722	0.673383
AT1G47250.1	1.746	0.298548	0.362201	0.632649
AT1G07930.2	1.785	0.388813	0.360035	0.517216
AT3G62620.2	1.846	0.241997	0.391044	0.745681
AT3G62620.3	1.883	0.257367	0.390054	0.722022
AT4G09030.1	1.58	0.294952	0.365279	0.642813
AT3G62620.1	2.053	0.256686	0.394539	0.726191
AT2G26170.2	1.514	0.247086	0.369712	0.720707
AT2G26170.1	1.498	0.272334	0.375075	0.687519
AT3G51370.2	1.666	0.257508	0.362099	0.695462
AT3G51370.1	1.658	0.271671	0.361158	0.672295
AT4G08850.2	1.923	0.22107	0.374636	0.764333
AT4G08850.1	1.893	0.233791	0.375792	0.745483
AT4G32010.1	1.996	0.243166	0.386006	0.738471
AT1G21630.2	1.723	0.279098	0.371761	0.671754
AT2G41300.1	1.563	0.286083	0.370466	0.659689
AT1G73030.1	1.656	0.318312	0.363883	0.605603
AT1G21630.1	1.707	0.29235	0.372334	0.652673
AT4G19060.1	1.853	0.284866	0.374863	0.661795
AT3G25840.2	1.941	0.332405	0.3733	0.594951
AT3G25840.1	1.895	0.338262	0.369209	0.582419
AT1G27030.1	1.749	0.318602	0.365138	0.609214
AT1G25209.1	1.668	0.232722	0.376807	0.748107
AT2G20950.2	1.722	0.264352	0.364111	0.685717
AT2G20950.1	1.673	0.274227	0.361301	0.6678
AT3G06450.2	2.118	0.273792	0.38121	0.683107
AT3G25150.2	1.768	0.294978	0.368582	0.646314
AT3G06030.1	1.686	0.249346	0.383245	0.728668
AT3G02950.1	1.681	0.312285	0.355079	0.60339
AT1G61667.1	2.184	0.271736	0.387026	0.695101
AT2G21060.1	1.559	0.379668	0.35558	0.518635
AT4G29130.1	1.864	0.238807	0.377493	0.738377
AT4G15760.2	1.638	0.228811	0.36724	0.74547
AT4G15760.1	1.614	0.245374	0.370607	0.722824
AT2G02820.2	1.535	0.284984	0.368692	0.661867
AT2G02820.1	1.43	0.310152	0.361259	0.617779
AT3G58270.1	1.39	0.250289	0.365011	0.709536
AT1G33700.1	1.886	0.256974	0.369125	0.701103
AT4G02270.1	2.63	0.297989	0.377643	0.646429
AT1G33700.2	1.879	0.258004	0.368519	0.698882
AT3G58820.1	2.198	0.123162	0.361636	0.901613
AT3G58270.2	1.387	0.252763	0.366942	0.708119
AT5G10490.2	1.912	0.232432	0.38056	0.750551
AT1G76160.1	1.965	0.319117	0.370368	0.613417
AT3G52090.2	1.677	0.260556	0.372856	0.704358
AT4G11360.1	1.698	0.283417	0.382022	0.677066
AT4G21190.1	1.995	0.245208	0.386759	0.736636
AT5G62900.1	1.868	0.273448	0.372528	0.682627
AT1G58030.1	1.776	0.262182	0.384639	0.710791
AT2G30840.1	1.763	0.22978	0.37449	0.747817
AT4G19990.1	2.148	0.249477	0.388652	0.732344
AT5G11990.1	1.89	0.281338	0.385908	0.684884
AT4G19990.2	2.156	0.251325	0.387673	0.72847
AT3G27100.1	1.824	0.259827	0.378304	0.707819
AT3G27100.2	2.036	0.231146	0.388735	0.760745
AT5G10930.1	2.023	0.225327	0.376717	0.758813
AT1G51450.1	1.91	0.266533	0.373254	0.690863
AT1G29470.1	1.498	0.354685	0.359907	0.55845
AT5G03420.1	1.871	0.223278	0.37404	0.759947
AT1G19880.1	1.807	0.306854	0.366982	0.628502
AT3G10480.3	1.838	0.235061	0.374732	0.743366
AT4G29870.1	1.951	0.278826	0.373869	0.672861
AT5G67570.1	1.523	0.278328	0.365202	0.667821
AT3G48680.1	1.437	0.297492	0.351535	0.622716
AT4G08110.1	1.943	0.21014	0.373649	0.779907
AT5G01390.4	1.854	0.23905	0.381201	0.741658
AT5G01390.3	1.875	0.230178	0.380332	0.754966
AT5G59180.1	1.801	0.235775	0.374893	0.741706
AT1G58684.1	1.739	0.373866	0.353207	0.522583
AT5G03905.1	1.737	0.234768	0.376791	0.743434
AT3G18230.1	2.056	0.274895	0.380958	0.684293
AT5G15610.1	1.804	0.286698	0.370354	0.657366
AT2G36307.1	1.487	0.198101	0.366156	0.794102
AT5G47100.1	1.715	0.227441	0.367517	0.745491
AT1G48320.1	1.936	0.247017	0.390702	0.738395
AT2G18380.1	1.698	0.173531	0.365063	0.830377
AT4G32450.1	1.837	0.225631	0.37963	0.761527
AT4G33565.1	1.984	0.222076	0.382	0.768899
AT2G22970.1	1.605	0.246852	0.369488	0.71787
AT5G50110.1	1.526	0.188062	0.371454	0.813165
AT1G30900.1	1.843	0.267777	0.367184	0.685583
AT1G68880.1	1.857	0.242861	0.382524	0.733395
AT1G17210.1	1.854	0.288869	0.372263	0.657867
AT1G13170.1	1.877	0.258772	0.371972	0.702711
AT1G13170.2	1.929	0.24513	0.373914	0.725784
AT1G02220.1	1.78	0.262747	0.373799	0.697636
AT3G51430.1	2.059	0.217591	0.371133	0.766173
AT1G14010.1	1.52	0.322288	0.362165	0.60142
AT5G42780.1	1.953	0.27947	0.378403	0.675925
AT1G28580.2	1.898	0.247323	0.365227	0.713679
AT1G28580.1	1.789	0.275035	0.361744	0.666607
AT2G27140.1	1.539	0.295951	0.362536	0.638542
AT5G16110.1	1.712	0.265106	0.369891	0.693361
AT5G55990.1	1.696	0.24171	0.357939	0.716679
AT2G41250.1	1.789	0.297888	0.368279	0.637214
AT5G27920.1	2.167	0.230327	0.378836	0.752634
AT1G03730.1	2.601	0.219813	0.39684	0.780976
AT5G45100.2	1.811	0.253955	0.369786	0.707391
AT2G43610.1	1.803	0.342953	0.372006	0.57996
AT3G56120.1	2.076	0.249359	0.38008	0.723001
AT5G67560.1	1.652	0.272259	0.368824	0.6798
AT5G44020.1	1.713	0.362199	0.371944	0.5624
AT3G48150.1	1.86	0.239511	0.372072	0.730228
AT1G55450.1	1.514	0.257573	0.361219	0.694196
AT1G52980.1	1.757	0.332375	0.358064	0.575561
AT3G06360.1	1.579	0.217246	0.361397	0.752686
AT2G25680.1	1.725	0.288112	0.369184	0.658509
AT1G30330.2	2.391	0.246448	0.385392	0.733808
AT3G10330.1	1.842	0.273436	0.381751	0.688719
AT4G08500.1	1.714	0.252832	0.371945	0.712824
AT1G10095.1	2.153	0.200211	0.383739	0.800731
AT5G67320.1	1.685	0.328359	0.35124	0.576014
AT4G31180.1	2.127	0.311885	0.37193	0.625211
AT4G31180.2	2.126	0.307842	0.371727	0.630661
AT2G36650.1	1.715	0.314234	0.356046	0.603816
AT3G42658.1	1.917	0.118194	0.356012	0.906023
AT4G03200.1	1.701	0.248411	0.377238	0.724757
AT3G45960.2	1.479	0.256128	0.370558	0.70725
AT1G58983.1	1.739	0.373866	0.353207	0.522583
AT1G06910.1	1.711	0.26941	0.372781	0.68504
AT3G45960.1	1.522	0.242793	0.373425	0.731112
AT1G52060.1	1.799	0.25252	0.368471	0.707924
AT1G79480.1	2.219	0.207574	0.394301	0.798704
AT1G79480.2	2.21	0.205522	0.392548	0.800512
AT5G44240.2	2.383	0.234545	0.382516	0.746804
AT5G05790.1	1.447	0.286144	0.359959	0.651785
AT5G44240.1	2.384	0.225333	0.379276	0.758236
AT3G14610.1	1.898	0.298223	0.378708	0.652205
AT3G44110.1	2.13	0.36431	0.360983	0.541238
AT1G74260.1	1.847	0.283116	0.371046	0.664926
AT3G22590.1	1.922	0.316467	0.3674	0.613009
AT1G52500.1	2.091	0.270889	0.375992	0.685306
AT3G25717.1	1.597	0.348116	0.37667	0.586587
AT2G46030.1	1.722	0.251161	0.371777	0.709798
AT3G57080.1	1.612	0.228852	0.369572	0.748489
AT2G47110.1	1.481	0.385517	0.361004	0.521183
AT2G47110.2	1.524	0.386354	0.365639	0.526805
AT3G25190.1	1.802	0.380519	0.348649	0.504202
AT5G27150.1	1.933	0.254455	0.381368	0.719636
AT2G45010.1	1.793	0.261872	0.377601	0.702821
AT5G57120.1	1.945	0.369125	0.36584	0.542137
AT3G55200.1	1.878	0.272833	0.372635	0.681834
AT5G20520.1	1.487	0.282467	0.365215	0.662337
AT1G11910.1	1.686	0.352235	0.353063	0.546097
AT4G35230.1	1.797	0.320885	0.365204	0.605087
AT3G12870.1	1.68	0.252218	0.380067	0.721224
AT4G30020.1	1.859	0.273912	0.369955	0.676948
AT5G20500.1	1.559	0.311832	0.354189	0.603519
AT1G01780.1	1.672	0.275831	0.365842	0.67185
AT5G62050.1	1.907	0.257957	0.376934	0.708134
AT3G60130.1	1.957	0.27733	0.380498	0.684082
AT2G40750.1	1.984	0.219673	0.370984	0.760474
AT3G60130.3	2.038	0.25755	0.379358	0.711732
AT1G09830.1	1.671	0.240145	0.373703	0.734537
AT3G12120.2	1.77	0.351365	0.359594	0.557296
AT3G12550.1	2.032	0.224816	0.37241	0.754837
AT3G19640.1	1.665	0.299941	0.374079	0.645809
AT3G06480.1	1.884	0.258126	0.382941	0.713426
AT1G32460.1	1.919	0.271541	0.366816	0.673591
AT2G23070.1	1.612	0.274425	0.36072	0.665639
AT5G06265.3	1.811	0.226005	0.38012	0.760079
AT2G36130.1	1.659	0.332366	0.367753	0.591959
AT1G60680.1	1.917	0.342111	0.356594	0.565586
AT2G16930.2	1.403	0.291051	0.360359	0.645152
AT2G16930.3	1.43	0.265243	0.358216	0.681304
AT5G06570.2	1.704	0.249886	0.372071	0.717877
AT1G27440.1	1.697	0.215879	0.365039	0.76248
AT4G16141.1	1.628	0.32246	0.354823	0.592161
AT5G19930.2	2.043	0.22785	0.379353	0.757814
AT5G42770.1	1.603	0.287571	0.363074	0.651167
AT5G42770.2	1.695	0.273934	0.362127	0.667387
AT5G19930.1	2.059	0.224481	0.378263	0.761533
AT2G16950.2	2.407	0.259706	0.384164	0.710909
AT2G16950.1	2.441	0.252161	0.383109	0.721467
AT5G10060.1	1.941	0.290461	0.377139	0.660085
AT3G29160.1	1.893	0.252388	0.372335	0.711459
AT3G29160.2	1.886	0.250583	0.37158	0.713603
AT3G29160.3	1.811	0.251154	0.365372	0.706377
AT1G12340.1	1.795	0.196395	0.371945	0.800736
AT4G36240.1	2.093	0.209794	0.376476	0.781086
AT5G61770.3	1.856	0.277834	0.372614	0.67617
AT5G61770.2	1.832	0.28838	0.371125	0.659116
AT5G61770.1	1.837	0.274991	0.371799	0.679688
AT1G48698.1	1.759	0.210108	0.371525	0.774912
AT1G11680.1	1.921	0.303534	0.368469	0.63158
AT3G01610.1	2.148	0.265829	0.380356	0.698645
AT3G22750.1	1.912	0.24113	0.377503	0.736358
AT1G51270.4	1.839	0.220905	0.373177	0.764474
AT3G45900.1	1.755	0.25212	0.374908	0.716882
AT2G33630.1	1.53	0.29644	0.371998	0.649425
AT1G76980.1	2.435	0.217064	0.40608	0.790506
AT5G05730.1	1.587	0.294247	0.359741	0.63537
AT4G32330.2	1.707	0.311605	0.353635	0.601396
AT5G05730.2	1.616	0.283393	0.363903	0.656713
AT1G74920.1	1.769	0.336513	0.353761	0.569865
AT1G29880.1	1.921	0.29825	0.374845	0.647168
AT4G29890.1	1.824	0.232554	0.379561	0.747874
AT5G08560.2	1.82	0.283331	0.371949	0.667409
AT1G54610.1	1.947	0.299574	0.369675	0.63935
AT1G54610.2	1.952	0.285496	0.371492	0.660953
AT1G54610.3	1.957	0.288217	0.369503	0.655393
AT1G33560.1	2.404	0.207752	0.381921	0.785822
AT5G23630.1	2.114	0.256838	0.374444	0.707869
AT1G25560.1	1.704	0.28885	0.374771	0.659749
AT1G61750.1	1.68	0.22073	0.372277	0.762527
AT2G31440.1	1.594	0.200874	0.360496	0.784082
AT1G65840.1	1.681	0.237414	0.363618	0.727401
AT2G25560.1	1.847	0.221346	0.377005	0.764996
AT1G19740.1	1.729	0.227072	0.383072	0.762589
AT2G38000.1	1.52	0.281686	0.379877	0.679829
AT5G15320.1	1.408	0.275082	0.350716	0.651847
AT4G27040.2	1.793	0.237882	0.360391	0.723728
AT5G23405.2	1.31	0.289185	0.364017	0.653587
AT4G14145.1	1.718	0.301324	0.373723	0.64174
AT1G51610.1	2.294	0.200177	0.381178	0.800907
AT1G08370.1	1.594	0.280331	0.364387	0.662952
AT2G22490.1	1.886	0.257445	0.367967	0.700512
AT2G22490.2	1.951	0.262453	0.371746	0.696551
AT3G16720.1	1.741	0.211106	0.379532	0.780601
AT5G47435.1	1.698	0.255865	0.377633	0.712922
AT1G07135.1	1.901	0.283366	0.372489	0.660102
AT2G11880.1	1.737	0.252398	0.38377	0.722335
AT5G60640.1	1.773	0.329801	0.356054	0.578606
AT5G60640.2	1.785	0.316094	0.357886	0.600152
AT5G60640.3	1.829	0.328534	0.363697	0.590579
AT1G25211.1	1.579	0.317193	0.36704	0.614358
AT1G54010.1	1.92	0.24799	0.376978	0.722679
AT3G52420.1	1.468	0.281337	0.3548	0.645333
AT1G06780.2	1.958	0.231402	0.372483	0.745333
AT3G53500.2	1.632	0.32111	0.363294	0.603567
AT3G53500.1	1.651	0.31875	0.369092	0.613805
AT5G60620.1	1.924	0.275739	0.365557	0.668059
AT2G05540.1	1.501	0.235874	0.368834	0.738113
AT1G45249.1	1.958	0.296793	0.381792	0.655746
AT1G45249.2	1.942	0.264272	0.378428	0.700646
AT1G45249.3	1.944	0.277633	0.37653	0.679309
AT2G01100.1	1.966	0.353779	0.357991	0.547891
AT2G01100.3	2.021	0.335685	0.361207	0.576153
AT2G01100.2	1.948	0.372509	0.35583	0.522585
AT5G27860.1	1.868	0.289845	0.378552	0.663772
AT3G19050.1	1.957	0.276608	0.373866	0.676306
AT4G23885.1	1.433	0.288793	0.368449	0.658325
AT5G27860.2	1.871	0.263302	0.370325	0.694119
AT4G21600.1	1.816	0.30881	0.373989	0.630592
AT5G45410.2	1.681	0.27693	0.362091	0.664364
AT3G21610.2	1.842	0.21477	0.371057	0.76729
AT3G14350.2	1.76	0.256041	0.364152	0.701366
AT3G14350.1	1.717	0.27511	0.363254	0.670913
AT3G21610.1	1.849	0.211223	0.369404	0.77208
AT1G25025.1	1.487	0.255388	0.375575	0.711795
AT5G39740.2	1.605	0.363742	0.364037	0.549768
AT1G05430.1	1.907	0.282674	0.381636	0.677187
AT3G07430.1	1.811	0.264771	0.382595	0.70557
AT1G70090.1	2.358	0.215773	0.399405	0.786802
AT1G70090.2	2.567	0.19746	0.410626	0.822572
AT1G64572.1	1.574	0.285552	0.371526	0.663874
AT3G26910.2	1.794	0.238816	0.378269	0.737997
AT1G70430.1	3.482	0.116588	0.369111	0.912809
AT3G21810.1	1.694	0.259513	0.368905	0.699344
AT4G36180.1	1.766	0.241724	0.372203	0.72918
AT4G32605.1	1.669	0.265036	0.36934	0.691906
AT2G41500.1	1.691	0.289044	0.376695	0.66278
AT2G01830.3	1.965	0.274185	0.369795	0.675591
AT2G01830.2	1.945	0.284484	0.368584	0.658825
AT1G31020.1	1.518	0.212288	0.365607	0.770446
AT3G21430.2	1.921	0.230135	0.377329	0.750346
AT3G48820.1	1.633	0.272314	0.368574	0.679486
AT3G48820.2	1.63	0.272493	0.36986	0.681053
AT1G71850.1	1.838	0.241275	0.379954	0.734211
AT5G60950.1	1.898	0.246468	0.374449	0.726219
AT3G19520.1	1.926	0.277586	0.368421	0.670332
AT3G45800.1	7	0.192678	0.900383	0.960676
AT2G46535.1	1.598	0.301681	0.369493	0.638509
AT4G26670.1	1.758	0.205932	0.372627	0.788036
AT1G36050.2	2.132	0.306379	0.365749	0.623414
AT3G55060.1	1.764	0.28543	0.37294	0.663335
AT1G08340.1	1.817	0.255874	0.378104	0.713678
AT4G16100.1	1.894	0.227017	0.372074	0.75188
AT3G02870.1	2.208	0.225721	0.375034	0.754596
AT3G02870.3	2.288	0.212605	0.375041	0.775144
AT3G02870.2	1.983	0.200103	0.368988	0.790937
AT1G18250.1	1.609	0.289566	0.367617	0.654009
AT1G18250.2	1.609	0.269641	0.366333	0.682073
AT3G63440.1	1.755	0.261188	0.374807	0.703367
AT2G16790.1	1.787	0.225719	0.387928	0.768367
AT3G66652.2	2.289	0.237435	0.385972	0.746583
AT4G21540.1	1.702	0.298235	0.366872	0.638538
AT4G21540.3	1.697	0.29656	0.368028	0.642697
AT5G20000.1	1.638	0.300573	0.368907	0.639069
AT5G54310.1	1.678	0.294642	0.359239	0.636117
AT4G18060.1	1.954	0.260005	0.376678	0.704993
AT5G06750.3	1.876	0.208458	0.376488	0.78513
AT3G02850.1	1.736	0.318609	0.364961	0.607439
AT3G06190.2	1.867	0.259056	0.367396	0.697198
AT1G06760.1	1.756	0.351644	0.360889	0.556264
AT5G03890.1	1.595	0.3132	0.37799	0.628294
AT4G29480.1	1.65	0.341023	0.370229	0.585555
AT5G37830.1	1.917	0.287433	0.373172	0.661734
AT3G49601.1	1.764	0.396303	0.350889	0.493052
AT1G28340.1	1.879	0.261585	0.382967	0.710499
AT5G44800.1	2.122	0.246139	0.37957	0.728781
AT1G26250.1	1.344	0.389527	0.349649	0.505508
AT2G01021.1	1.542	0.217469	0.365446	0.753094
AT5G57565.3	1.754	0.209819	0.367604	0.773818
AT3G28210.1	2.371	0.195452	0.407663	0.825207
AT5G05230.1	1.729	0.245088	0.373048	0.725633
AT4G00730.1	2.03	0.194449	0.367906	0.800032
AT4G38260.1	1.722	0.252891	0.369138	0.707233
AT2G29580.1	1.9	0.229383	0.377014	0.751769
AT3G16810.1	1.623	0.265714	0.363357	0.682578
AT2G46220.1	1.774	0.263215	0.366469	0.691962
AT2G18700.1	1.872	0.288366	0.365952	0.648297
AT5G14120.1	1.79	0.304765	0.357957	0.616711
AT5G24630.5	2.055	0.240122	0.373905	0.732531
AT5G24630.4	2.029	0.244318	0.372895	0.724928
AT5G04480.2	1.975	0.257033	0.377373	0.710291
AT5G24630.6	2.041	0.232825	0.371273	0.741508
AT5G52470.2	1.656	0.360774	0.36262	0.551031
AT5G24630.3	2.029	0.243091	0.372542	0.726563
AT5G24630.2	2.025	0.234216	0.37429	0.741788
AT4G15560.1	1.876	0.277857	0.365563	0.666948
AT2G40660.1	1.737	0.308762	0.360078	0.615075
AT5G12330.1	1.95	0.204453	0.366286	0.785584
AT1G12410.1	1.683	0.288963	0.364608	0.652491
AT5G12330.3	2.002	0.199593	0.37159	0.796883
AT5G12330.2	1.968	0.199639	0.365223	0.792296
AT3G52390.1	1.754	0.263684	0.381507	0.705281
AT5G12330.4	2.043	0.218285	0.372937	0.768965
AT1G09160.2	1.938	0.228804	0.376653	0.753152
AT3G52390.2	1.783	0.261329	0.384146	0.711303
AT5G57350.2	2.034	0.255498	0.382043	0.716913
AT3G58040.1	1.895	0.286492	0.37263	0.660789
AT4G35750.1	1.74	0.311598	0.352034	0.597515
AT3G59890.2	2.172	0.254646	0.388731	0.723361
AT3G59890.1	2.174	0.25429	0.389953	0.725782
AT2G45910.1	1.988	0.262474	0.369954	0.695875
AT1G20110.1	2.041	0.280871	0.380804	0.678526
AT4G36060.2	1.723	0.26616	0.373609	0.690569
AT1G36640.1	1.613	0.259368	0.371952	0.705065
AT2G39000.3	1.754	0.234801	0.374589	0.741173
AT1G09590.1	1.342	0.390461	0.362856	0.520726
AT2G39000.1	1.735	0.235247	0.374158	0.740296
AT1G18030.2	1.872	0.252437	0.382926	0.7245
AT4G30950.1	2.179	0.255683	0.392117	0.726074
AT3G22142.1	2.088	0.26584	0.376236	0.696716
AT4G38040.1	1.782	0.242775	0.37847	0.733482
AT2G26500.2	1.737	0.15751	0.360473	0.855481
AT2G26500.3	1.937	0.172977	0.377785	0.842154
AT3G04880.1	1.821	0.315394	0.372589	0.619526
AT4G35080.1	1.704	0.256344	0.37973	0.713094
AT1G05090.1	1.811	0.243721	0.367255	0.720471
AT4G35080.3	1.749	0.242371	0.3814	0.736932
AT4G35080.2	1.77	0.242739	0.38607	0.739161
AT1G80460.2	1.664	0.308077	0.361935	0.618995
AT1G20770.1	1.63	0.285756	0.367243	0.657112
AT5G61020.1	1.891	0.35429	0.366558	0.562995
AT1G80460.1	1.649	0.331678	0.358177	0.582406
AT1G02900.1	1.65	0.314734	0.369756	0.619496
AT5G56795.1	1.186	0.263167	0.335725	0.650348
AT5G04870.1	1.604	0.302986	0.359583	0.624183
AT5G46430.2	1.652	0.359878	0.350527	0.532359
AT5G46430.1	1.707	0.371275	0.350343	0.518747
AT2G22170.1	1.635	0.348972	0.364182	0.569021
AT4G19120.1	1.602	0.251597	0.375111	0.718254
AT4G19120.2	1.589	0.253524	0.375287	0.715547
AT1G54210.1	2.159	0.228445	0.389143	0.762862
AT1G04635.1	1.92	0.203455	0.377684	0.791779
AT3G06670.2	1.826	0.266165	0.374247	0.693001
AT3G06670.1	1.814	0.287109	0.374871	0.661672
AT1G43670.1	1.582	0.262882	0.367653	0.694601
AT5G10710.1	1.805	0.2435	0.376962	0.727135
AT4G09650.1	2.147	0.188881	0.378114	0.818729
AT2G31600.1	2.196	0.209714	0.381504	0.783787
AT2G31600.2	2.16	0.208935	0.382041	0.786516
AT2G30320.1	1.708	0.242276	0.370892	0.727746
AT3G17712.3	1.935	0.238447	0.383159	0.742436
AT2G30920.1	1.881	0.204762	0.379415	0.791681
AT2G01505.1	1.672	0.191376	0.358124	0.796148
AT1G20960.1	1.732	0.314159	0.364587	0.612539
AT1G20960.2	1.728	0.313135	0.363674	0.612704
AT1G30460.1	2.222	0.241251	0.376833	0.734004
AT3G50670.1	1.55	0.331385	0.35948	0.583968
AT3G50670.2	1.687	0.300137	0.367367	0.635819
AT1G30460.2	1.839	0.214256	0.374015	0.772634
AT1G49860.1	1.565	0.404004	0.344713	0.475124
AT4G01330.1	1.841	0.295508	0.365121	0.640002
AT4G01330.2	1.871	0.285774	0.364521	0.653404
AT4G36420.1	1.568	0.332827	0.373477	0.604675
AT5G09220.1	1.633	0.297441	0.353311	0.621425
AT3G05410.2	1.985	0.194842	0.376091	0.806226
AT3G09250.1	1.556	0.235475	0.372668	0.742702
AT3G09250.2	1.595	0.223375	0.369794	0.75769
AT3G05410.1	2.322	0.136532	0.390377	0.895243
AT2G14460.1	1.75	0.281465	0.3586	0.649295
AT3G19990.1	2.167	0.301913	0.371692	0.635404
AT5G58210.4	1.889	0.212458	0.370839	0.774383
AT1G60995.1	1.596	0.276306	0.370459	0.674958
AT2G27100.1	1.755	0.292847	0.368845	0.648561
AT1G80840.1	1.548	0.258341	0.379526	0.709856
AT5G12350.1	1.67	0.26633	0.373835	0.692705
AT5G05450.1	1.718	0.280088	0.369545	0.667676
AT3G20860.1	1.927	0.270825	0.377589	0.69143
AT2G20760.1	1.747	0.350891	0.369131	0.570561
AT5G65430.1	1.646	0.310348	0.365626	0.620274
AT5G65430.2	1.624	0.302276	0.364017	0.630139
AT5G65430.3	1.635	0.268784	0.363383	0.680532
AT3G17780.1	1.398	0.326076	0.356639	0.589262
AT3G10500.1	2.133	0.250159	0.377321	0.720821
AT5G54440.1	1.661	0.253885	0.376599	0.71489
AT2G28430.1	1.286	0.246407	0.363073	0.714668
AT4G14570.1	1.764	0.245939	0.379241	0.728044
AT3G02860.2	1.619	0.324232	0.371707	0.609877
AT3G22970.2	1.886	0.250191	0.373568	0.717468
AT1G48920.1	1.486	0.389568	0.348778	0.500529
AT2G28890.1	2.264	0.302443	0.372362	0.634276
AT1G08580.1	1.676	0.3602	0.360222	0.546409
AT3G08610.1	1.527	0.352775	0.341799	0.528254
AT1G09150.1	1.896	0.292022	0.36842	0.650274
AT3G06700.1	1.643	0.393844	0.362539	0.510323
AT2G01970.1	1.794	0.279482	0.37055	0.66963
AT3G19650.1	1.571	0.327592	0.361295	0.592424
AT5G65000.1	1.854	0.228912	0.375323	0.749137
AT5G58510.1	1.857	0.252025	0.383044	0.723616
AT5G65000.2	1.885	0.207137	0.369689	0.779105
AT4G21150.2	1.977	0.251963	0.370503	0.711324
AT4G21150.3	1.931	0.253307	0.367275	0.706492
AT4G21150.1	1.928	0.254688	0.366493	0.703356
AT5G28080.2	1.806	0.297129	0.370932	0.644783
AT5G65020.2	2.423	0.362293	0.361417	0.540097
AT5G65020.1	2.429	0.363008	0.360287	0.539346
AT1G23290.1	1.509	0.362802	0.353933	0.539569
AT5G47500.1	1.94	0.2193	0.371525	0.761679
AT3G25290.2	1.808	0.293125	0.366887	0.646019
AT3G16630.1	1.694	0.280636	0.366896	0.665078
AT3G25290.1	1.838	0.291108	0.371137	0.653897
AT1G13870.1	1.526	0.28519	0.364469	0.655729
AT3G05900.1	1.927	0.378326	0.350495	0.509614
AT1G55140.1	1.732	0.196693	0.367494	0.796965
AT2G39080.1	1.935	0.256859	0.375405	0.709345
AT4G39838.1	2.085	0.285031	0.368114	0.657262
AT4G02120.1	1.779	0.255138	0.372825	0.707831
AT4G31420.1	1.87	0.277352	0.370205	0.671004
AT2G38870.1	2.197	0.231429	0.419784	0.778459
AT5G38480.2	1.661	0.32041	0.363839	0.606115
AT5G38480.1	1.655	0.340298	0.357924	0.571361
AT1G17470.1	1.742	0.317174	0.365157	0.610978
AT5G49470.3	2.335	0.253824	0.381743	0.716963
AT1G60610.2	2.009	0.270993	0.381252	0.694609
AT1G17470.2	1.745	0.309425	0.365999	0.622887
AT1G09130.3	1.446	0.256048	0.364668	0.702753
AT1G09130.2	1.422	0.257572	0.365183	0.700824
AT1G09130.1	1.447	0.26997	0.368203	0.685243
AT1G55150.1	1.456	0.263887	0.366514	0.687759
AT1G07780.4	1.629	0.24335	0.371287	0.728293
AT1G07780.5	1.578	0.262817	0.370566	0.698021
AT1G07780.2	1.529	0.280129	0.370189	0.671808
AT1G07780.3	1.628	0.252373	0.37056	0.713832
AT1G07780.1	1.527	0.286928	0.368643	0.659907
AT5G38460.1	2.127	0.205069	0.370608	0.784707
AT5G45340.2	1.762	0.240684	0.37917	0.739343
AT5G38460.2	2.194	0.202881	0.37693	0.793637
AT5G16770.1	1.884	0.236426	0.386406	0.748974
AT4G25630.1	1.473	0.341393	0.35753	0.571236
AT4G22250.1	1.717	0.278995	0.374722	0.67379
AT4G16360.3	2.102	0.237719	0.382422	0.740277
AT4G16360.2	2.251	0.245425	0.379921	0.7246
AT4G16360.1	2.217	0.251032	0.379484	0.715609
AT1G01225.1	1.744	0.20396	0.370451	0.787974
AT1G79630.3	1.613	0.257748	0.372987	0.70532
AT5G16750.1	1.912	0.285065	0.379262	0.670883
AT1G51130.1	1.874	0.249246	0.38243	0.727298
AT3G50260.1	1.987	0.246428	0.391441	0.741653
AT4G26970.1	1.654	0.292866	0.357764	0.63534
AT3G22320.1	1.49	0.313954	0.359073	0.607681
AT1G22030.1	1.768	0.294919	0.363725	0.638769
AT1G68160.1	1.783	0.20977	0.370762	0.777459
AT3G09490.1	1.694	0.280953	0.372037	0.668648
AT3G45610.1	2.041	0.228089	0.390313	0.763781
ATCG00920.1	1.824	0.228575	0.370771	0.749322
AT5G66210.4	2.208	0.280827	0.372557	0.668087
AT3G50070.1	1.487	0.263638	0.37325	0.696081
AT5G66210.1	2.101	0.283289	0.367042	0.658596
AT4G13430.1	1.652	0.365911	0.358841	0.539785
AT5G66210.3	1.604	0.27136	0.366379	0.678322
AT4G14550.1	1.798	0.208317	0.369986	0.780926
AT5G54130.4	1.767	0.238145	0.365343	0.7271
AT3G17170.1	2.202	0.284692	0.368423	0.657469
AT1G06960.1	1.52	0.277747	0.364093	0.667967
AT5G59613.2	1.844	0.296116	0.38372	0.660777
AT1G06960.3	1.566	0.270334	0.366715	0.683045
AT1G06960.2	1.579	0.274136	0.372418	0.680944
AT3G24515.1	1.651	0.244559	0.369306	0.721049
AT1G25422.1	1.604	0.196708	0.35994	0.79254
AT4G26080.1	2.085	0.248136	0.380639	0.72866
AT3G52150.2	1.781	0.20211	0.374839	0.794287
AT3G52150.1	1.8	0.205184	0.373595	0.788703
AT1G14340.1	1.547	0.238357	0.370248	0.73374
AT4G15820.1	1.755	0.297528	0.365919	0.637732
AT3G52890.1	2.564	0.233363	0.382137	0.749494
AT5G09590.1	1.707	0.291505	0.37613	0.660747
AT4G13770.1	1.791	0.343303	0.362961	0.572128
AT1G62422.1	1.759	0.197926	0.372052	0.799232
AT3G12570.1	1.877	0.272759	0.373849	0.683484
AT3G12570.3	1.875	0.26859	0.371984	0.687887
AT5G57870.2	1.7	0.293493	0.367075	0.643871
AT3G12570.4	1.898	0.263771	0.372152	0.695094
AT5G55070.1	1.782	0.261113	0.37076	0.696127
AT4G02520.1	1.58	0.30557	0.359411	0.619348
AT3G52140.4	1.975	0.303456	0.371614	0.635133
AT2G40830.3	2.056	0.217947	0.380561	0.770977
AT2G40830.1	2.008	0.220894	0.376482	0.763281
AT5G29000.1	1.827	0.278291	0.372917	0.674357
AT3G52140.1	1.956	0.313241	0.369709	0.618909
AT3G52140.2	1.984	0.310766	0.37198	0.625341
AT5G29000.2	1.852	0.273243	0.373786	0.682544
AT5G39840.1	1.926	0.230459	0.38061	0.751683
AT1G74160.1	2.509	0.216097	0.37857	0.772245
AT1G10570.1	1.808	0.260074	0.386065	0.712652
AT2G36000.2	1.733	0.216543	0.366757	0.763035
AT1G10570.2	1.812	0.259811	0.386021	0.713113
AT5G13490.2	1.886	0.246686	0.390475	0.737039
AT5G13490.1	1.874	0.254301	0.388923	0.724091
AT2G47050.1	7	0.214371	1.1582	0.968824
AT3G49420.1	1.577	0.243675	0.379167	0.734618
ATMG01390.1	2.701	0.260249	0.382789	0.689935
AT5G53120.4	1.691	0.26316	0.371023	0.696201
AT3G25710.1	1.479	0.281367	0.356635	0.651652
AT3G16850.1	1.847	0.272434	0.372365	0.682279
AT4G38090.4	1.873	0.207709	0.372007	0.781974
AT2G05910.1	1.836	0.221355	0.373958	0.762668
AT4G38090.1	1.778	0.228688	0.377333	0.755045
AT1G80810.2	1.872	0.27952	0.371311	0.669064
AT4G38090.3	1.804	0.210011	0.369793	0.776844
AT4G38090.2	1.842	0.201911	0.369864	0.789561
AT3G22520.1	1.735	0.279985	0.370049	0.668829
AT4G00026.1	1.485	0.285891	0.360949	0.651085
AT5G50640.1	2.136	0.245544	0.381387	0.729222
AT1G55330.1	1.532	0.307283	0.357155	0.61513
AT1G48790.1	1.845	0.258229	0.377088	0.708056
AT1G35460.1	1.729	0.246996	0.380354	0.730128
AT1G49470.1	2.211	0.253107	0.391436	0.724754
AT5G52280.1	1.88	0.348414	0.369953	0.574021
AT1G73820.1	1.669	0.286304	0.379632	0.669895
AT5G54569.1	2.097	0.21415	0.381056	0.777392
AT5G46410.2	1.765	0.23044	0.369597	0.743029
AT1G75220.1	1.619	0.260433	0.375424	0.704618
AT1G04520.1	1.759	0.245858	0.371362	0.722557
AT3G48560.1	1.736	0.327848	0.352254	0.579018
AT5G02480.1	1.681	0.305493	0.365546	0.627065
AT1G11430.1	1.922	0.272147	0.370745	0.678845
AT4G01100.2	1.878	0.316325	0.361828	0.604344
AT4G01100.1	1.863	0.323252	0.356926	0.587663
AT3G62220.1	2.105	0.247942	0.384215	0.726313
AT2G47640.4	1.871	0.310674	0.365954	0.613364
AT4G17486.1	1.722	0.25942	0.373537	0.706036
AT1G07810.1	1.747	0.288562	0.370233	0.656916
AT1G80500.1	1.512	0.275376	0.366375	0.671881
AT2G47640.1	1.855	0.310637	0.365665	0.615679
AT2G47640.2	1.838	0.310655	0.368887	0.621133
AT2G47640.3	1.833	0.307983	0.368071	0.622423
AT2G10410.1	1.943	0.307606	0.372147	0.630912
AT3G03520.1	1.543	0.317137	0.35732	0.600945
AT3G19180.2	2.428	0.197803	0.382853	0.803775
AT2G18160.1	1.624	0.305437	0.359269	0.620515
AT1G32130.1	1.522	0.324447	0.354496	0.586627
AT2G47620.1	1.82	0.283291	0.373775	0.666543
AT2G24140.1	1.675	0.247576	0.367231	0.71648
AT4G01110.1	1.996	0.225691	0.382393	0.760718
AT1G68725.1	1.518	0.277817	0.364536	0.667969
AT1G73230.1	1.634	0.340598	0.363381	0.576081
AT1G66410.2	1.88	0.317371	0.375426	0.624571
AT1G66410.1	1.74	0.404233	0.358679	0.496542
AT1G04430.2	2.078	0.300369	0.36179	0.627007
AT4G12040.2	1.665	0.215279	0.359138	0.758091
AT2G01735.1	1.759	0.248174	0.377239	0.725201
AT4G12040.1	1.494	0.273219	0.358776	0.666922
AT5G59410.1	1.502	0.252731	0.369775	0.711482
AT1G32130.2	1.551	0.307969	0.358916	0.614909
AT1G76800.1	1.96	0.309122	0.361457	0.613641
AT1G69230.1	1.585	0.271387	0.362982	0.676305
AT3G12145.1	2.063	0.235319	0.379079	0.745551
AT5G65310.1	1.781	0.292261	0.365918	0.647934
AT3G11170.1	2.024	0.225393	0.381485	0.762061
AT1G26760.1	2.33	0.260482	0.376444	0.703083
AT1G76820.1	1.814	0.283965	0.38085	0.673617
AT3G58640.2	1.948	0.260954	0.375103	0.701107
AT5G53460.2	1.749	0.339922	0.360003	0.573184
AT3G54400.1	1.739	0.275601	0.368291	0.676371
AT1G33680.1	1.992	0.302011	0.368576	0.634441
AT4G22140.1	2.117	0.268473	0.374477	0.687859
AT4G22140.2	1.993	0.298083	0.369216	0.63995
AT2G33730.1	1.534	0.331191	0.353878	0.579492
AT4G16670.1	1.787	0.195977	0.366428	0.796196
AT2G45050.1	1.812	0.282767	0.362246	0.655185
AT5G06570.1	1.597	0.266087	0.367484	0.68917
AT4G21810.1	1.783	0.283349	0.37213	0.667617
AT5G11260.1	1.632	0.280171	0.360618	0.658245
AT4G05420.1	1.72	0.277908	0.367632	0.668081
AT4G05420.2	1.716	0.277199	0.368498	0.670519
AT1G31410.1	2.036	0.226086	0.38185	0.761448
AT5G19740.1	1.66	0.287579	0.363257	0.651205
AT2G41480.1	1.551	0.304249	0.361022	0.623282
AT3G07950.1	1.845	0.271065	0.378317	0.692047
AT3G55260.1	1.975	0.259803	0.385033	0.713035
AT1G06475.1	1.997	0.207885	0.376459	0.779862
AT5G56950.1	2.042	0.32236	0.363088	0.600066
AT3G24120.2	1.874	0.277255	0.372012	0.675835
AT3G24120.1	1.743	0.300585	0.370283	0.639185
AT1G50490.1	1.815	0.294611	0.359509	0.635426
AT1G65470.2	1.747	0.254624	0.367955	0.706194
AT3G31161.1	1.219	0.534704	0.313281	0.30718
AT3G23600.1	1.944	0.360976	0.35953	0.540495
AT1G54050.1	1.665	0.25152	0.379295	0.722347
AT5G51100.1	1.856	0.248489	0.37904	0.721842
AT2G39930.1	1.775	0.226358	0.376446	0.75641
AT2G38810.3	1.752	0.247104	0.365447	0.715093
AT2G38810.2	1.523	0.260495	0.35753	0.6876
AT2G38810.1	1.752	0.243696	0.367551	0.723344
AT5G10400.1	1.386	0.33149	0.351962	0.574788
AT4G22320.1	2.054	0.309701	0.372365	0.622228
AT4G22320.2	2.104	0.30576	0.376267	0.632993
AT1G65280.1	1.694	0.333802	0.359568	0.580282
AT1G13880.1	1.964	0.267079	0.372912	0.690506
AT3G26510.4	1.906	0.267741	0.376087	0.693451
AT3G26510.5	2.126	0.195682	0.368892	0.799595
AT4G15130.1	1.681	0.262421	0.363084	0.690874
AT3G47370.1	1.606	0.30436	0.357625	0.618509
AT3G26510.1	1.962	0.231119	0.369213	0.743599
AT3G26510.2	1.894	0.266567	0.376383	0.69605
AT3G26510.3	2.017	0.218908	0.371386	0.764697
AT2G15280.2	1.63	0.231587	0.362228	0.735311
AT2G15280.1	1.64	0.247296	0.366795	0.716289
AT2G30260.1	1.804	0.292992	0.368461	0.647744
AT1G12880.1	1.828	0.242545	0.385506	0.741389
AT5G20180.2	1.598	0.201356	0.367493	0.788587
AT4G32570.1	1.888	0.22715	0.379939	0.760418
AT1G19870.1	1.702	0.310401	0.359997	0.612488
AT5G65620.1	1.908	0.282107	0.373399	0.668404
AT1G72250.1	1.778	0.242178	0.366718	0.723878
AT1G72250.2	1.719	0.252968	0.366306	0.707141
AT2G30200.2	1.622	0.242142	0.371228	0.728809
AT3G16180.1	2.029	0.216604	0.377436	0.774709
AT1G55810.3	1.732	0.272454	0.36358	0.674009
AT2G30200.1	1.493	0.271348	0.361102	0.672677
AT1G63120.1	1.512	0.21625	0.358345	0.756462
AT4G34030.1	1.498	0.308749	0.358163	0.615947
AT3G15000.1	1.586	0.337396	0.359936	0.577253
AT4G22930.1	2.078	0.24369	0.3752	0.729074
AT1G59970.1	1.948	0.227674	0.373042	0.753045
AT1G77840.1	1.769	0.288738	0.36224	0.648195
AT3G60380.1	1.678	0.26263	0.378844	0.70593
AT5G16070.1	1.986	0.298816	0.368764	0.63955
AT4G33650.2	1.877	0.238434	0.373343	0.735778
AT4G33650.1	1.868	0.239379	0.37257	0.73356
AT1G27350.1	1.553	0.305688	0.378358	0.644625
AT5G64360.4	2.305	0.26101	0.377826	0.702635
AT5G64360.3	2.24	0.270896	0.373009	0.682217
AT5G64360.2	2.366	0.24981	0.38012	0.721808
AT5G64360.1	2.512	0.245831	0.383239	0.730357
AT2G30950.1	1.896	0.233512	0.376182	0.745337
AT1G18700.2	1.82	0.231356	0.377574	0.750393
AT1G18700.3	1.771	0.235103	0.375343	0.742794
AT1G18700.1	1.765	0.243273	0.37574	0.730016
AT1G18700.4	1.762	0.237871	0.373832	0.736587
AT1G53885.1	1.451	0.254409	0.353736	0.69094
AT5G63840.1	1.914	0.304699	0.36677	0.628103
AT5G02880.1	2.211	0.224805	0.379245	0.759694
AT5G26670.2	2.343	0.240788	0.391025	0.743173
AT5G26670.1	2.282	0.258849	0.388091	0.713295
AT1G69250.1	1.818	0.259437	0.371639	0.702159
AT1G69250.2	1.875	0.24027	0.369176	0.728968
AT3G03460.1	1.693	0.24498	0.373433	0.723585
AT2G22910.1	1.945	0.218454	0.38433	0.773037
AT1G31335.1	1.408	0.255798	0.364348	0.699436
AT3G58670.1	1.827	0.258337	0.383466	0.714879
AT3G11630.1	1.683	0.319977	0.346654	0.580671
AT5G39600.1	1.565	0.297109	0.35738	0.625812
AT5G16910.1	1.984	0.236405	0.374378	0.737969
AT2G33770.1	1.736	0.311547	0.363373	0.615079
AT1G24879.1	1.579	0.264722	0.382545	0.705255
AT3G61070.1	1.863	0.240004	0.389096	0.745325
AT1G65040.2	1.915	0.209861	0.375791	0.781218
AT1G08180.1	1.605	0.240282	0.368628	0.729891
AT5G52370.1	1.388	0.285091	0.352826	0.64223
AT1G20510.1	1.614	0.277902	0.362767	0.665453
AT1G20510.2	1.685	0.267918	0.369079	0.687705
AT2G25355.2	1.95	0.259878	0.393736	0.720336
AT2G25355.1	1.929	0.274214	0.394511	0.699961
AT3G53510.1	2.27	0.191455	0.380457	0.812809
AT2G23340.1	1.7	0.318785	0.367069	0.611364
AT5G09740.1	1.869	0.319374	0.374818	0.618212
AT2G44620.1	1.726	0.270746	0.374369	0.689433
AT3G55170.1	1.556	0.301763	0.37118	0.641903
AT4G35110.4	1.864	0.260143	0.378201	0.709607
AT4G35110.3	2.108	0.259199	0.383916	0.714989
AT4G35110.2	2.098	0.265092	0.38458	0.706866
AT4G35110.1	2.108	0.256261	0.382451	0.717885
AT2G42590.3	1.5	0.278623	0.362761	0.66599
AT5G49890.1	2.623	0.204279	0.407025	0.812704
AT4G14780.1	2.051	0.231933	0.388377	0.757125
AT5G09850.1	1.978	0.276098	0.368093	0.668977
AT1G16880.2	1.68	0.240384	0.380281	0.740195
AT1G16880.1	1.614	0.268672	0.376862	0.694789
AT1G17550.1	1.563	0.277962	0.36664	0.669531
AT2G27450.2	1.637	0.262286	0.363951	0.690457
AT4G09180.1	1.816	0.31735	0.372198	0.620402
AT1G45688.1	1.989	0.321936	0.363846	0.601247
AT1G28420.1	2.176	0.250828	0.380267	0.72157
AT1G45688.2	2.061	0.301367	0.36977	0.637286
AT2G21620.2	1.805	0.305752	0.367557	0.627734
AT4G35100.1	2.006	0.370468	0.365043	0.535988
AT4G35100.2	1.991	0.34373	0.368439	0.574167
AT2G21620.1	1.672	0.325954	0.358508	0.58947
AT4G00950.1	1.563	0.246673	0.380611	0.729139
AT1G32790.1	1.59	0.292758	0.363309	0.644757
AT4G00090.1	1.693	0.287821	0.369583	0.655883
AT1G29970.1	1.551	0.25749	0.361722	0.695697
AT1G29970.3	1.633	0.222749	0.361971	0.751721
AT1G29970.2	1.487	0.300066	0.361147	0.631138
AT5G57700.3	1.971	0.270409	0.379695	0.694233
AT5G57700.2	2.003	0.259433	0.378339	0.709035
AT5G57700.1	2.018	0.25683	0.380931	0.716028
AT2G02230.1	1.519	0.335966	0.360588	0.580252
AT5G10870.1	1.736	0.246959	0.381195	0.730409
AT5G57700.4	1.941	0.270208	0.375772	0.690318
AT1G29950.2	1.919	0.248041	0.372737	0.718064
AT1G29950.1	1.8	0.251572	0.362686	0.701791
AT4G00940.1	1.677	0.292793	0.360662	0.634929
AT1G64140.1	1.758	0.296464	0.363613	0.638698
AT1G13480.1	1.912	0.264815	0.382535	0.698423
AT4G33630.1	1.602	0.270585	0.370523	0.684196
AT4G33630.2	1.636	0.26134	0.371799	0.699839
AT1G32410.1	2.123	0.267365	0.388653	0.706014
AT3G48760.1	1.886	0.301955	0.369034	0.634543
AT3G08943.1	2.082	0.275466	0.376171	0.681044
AT1G17880.1	1.846	0.350344	0.371072	0.56807
AT5G01520.2	1.925	0.200151	0.375384	0.79742
AT1G36980.1	1.496	0.283189	0.351567	0.6428
AT5G62190.1	1.789	0.379701	0.352555	0.51344
AT2G38950.1	2.182	0.258356	0.384829	0.714068
AT4G24830.2	1.711	0.277591	0.376663	0.681292
AT5G10660.2	2.474	0.159469	0.415716	0.879762
AT2G14120.1	1.681	0.280919	0.368121	0.664631
AT4G17330.1	2.235	0.278349	0.377929	0.677138
AT2G14120.2	1.682	0.279183	0.36775	0.666796
AT1G07350.1	1.923	0.269113	0.379647	0.6948
AT4G02890.1	1.917	0.326728	0.369666	0.59895
AT4G02890.2	1.999	0.329614	0.375769	0.601935
AT1G09760.1	1.409	0.292305	0.36422	0.647132
AT4G02890.4	1.95	0.351378	0.366431	0.564312
AT3G26980.1	1.475	0.24989	0.362993	0.708241
AT2G41231.1	1.633	0.122288	0.344887	0.894452
AT1G27620.1	1.714	0.265309	0.369972	0.690979
AT3G17120.2	1.848	0.227189	0.369142	0.750281
AT1G74510.1	1.602	0.272168	0.365413	0.676667
AT5G25280.1	1.802	0.262762	0.3709	0.696578
AT1G04830.2	1.77	0.217933	0.368508	0.762218
AT1G70950.1	1.788	0.257827	0.373345	0.707979
AT5G13810.1	1.505	0.265791	0.360711	0.68196
AT4G09890.1	1.429	0.29249	0.35462	0.630674
AT4G27990.1	1.936	0.234269	0.387067	0.751602
AT1G72740.2	1.988	0.270698	0.376249	0.689399
AT3G52850.1	1.676	0.331369	0.361545	0.587248
AT1G74910.1	1.586	0.247407	0.364472	0.713902
AT3G04730.1	2.09	0.296013	0.375442	0.648203
AT1G74910.3	1.642	0.246979	0.362357	0.712709
AT1G74910.2	1.573	0.250063	0.364825	0.710409
AT3G04910.1	1.856	0.252315	0.3732	0.71222
AT2G44360.1	1.392	0.268606	0.347816	0.658936
AT2G44680.1	1.772	0.280037	0.383339	0.683702
AT5G03540.1	2.097	0.29163	0.372469	0.653681
AT5G03540.2	2.131	0.278464	0.371357	0.671128
AT2G44680.2	1.772	0.271938	0.380556	0.692218
AT5G05950.1	1.342	0.265113	0.363889	0.688138
AT3G52730.1	1.655	0.339649	0.371963	0.589873
AT3G43300.1	1.93	0.276454	0.371589	0.676959
AT4G38490.1	1.483	0.235994	0.366862	0.734615
AT2G43590.1	1.662	0.203093	0.368919	0.788245
AT1G30580.1	1.976	0.34159	0.360041	0.567926
AT2G18193.1	1.581	0.259165	0.367587	0.696419
AT5G60390.3	1.978	0.430155	0.346201	0.452611
AT1G75760.1	1.882	0.281017	0.372105	0.667151
AT5G42000.2	1.547	0.257779	0.370537	0.703987
AT5G26260.1	1.653	0.31105	0.356367	0.60545
AT2G24590.1	1.665	0.321771	0.376491	0.619746
AT3G04580.1	2.011	0.242615	0.369977	0.724414
AT5G20280.1	1.917	0.235213	0.376616	0.743869
AT2G43770.1	1.703	0.256018	0.362724	0.694969
AT2G39720.1	1.875	0.233957	0.37402	0.741657
AT3G53670.1	1.907	0.268269	0.369297	0.684432
AT3G53670.2	2.088	0.261651	0.384456	0.708392
AT3G57230.1	1.674	0.277106	0.372301	0.676614
AT3G57230.2	1.806	0.256302	0.37302	0.708069
AT5G13310.1	1.786	0.278544	0.374717	0.675264
AT2G20790.2	1.775	0.225729	0.371979	0.752833
AT3G06070.1	2.47	0.214852	0.391417	0.78276
AT2G06510.2	1.923	0.249753	0.374162	0.716328
AT1G24180.1	1.744	0.377317	0.356761	0.523659
AT1G59710.1	2.366	0.196988	0.372559	0.800844
AT3G01710.1	1.884	0.265802	0.373197	0.692106
AT1G20540.1	1.486	0.215736	0.367064	0.76462
AT3G01710.2	1.717	0.260123	0.370559	0.697671
AT3G51830.1	2.001	0.265148	0.370998	0.690163
AT5G12040.2	1.667	0.243569	0.378336	0.734393
AT4G02200.1	1.897	0.209356	0.371477	0.780346
AT1G17145.1	1.416	0.293647	0.372158	0.654578
AT4G02200.3	2.023	0.190185	0.376524	0.814514
AT4G02200.2	1.619	0.195662	0.368366	0.800479
AT2G30520.3	2.501	0.199586	0.398373	0.813126
AT2G30520.2	2.633	0.194388	0.400425	0.822536
AT2G30520.1	2.359	0.209935	0.388876	0.79007
AT5G24880.1	1.74	0.26205	0.367765	0.694067
AT1G08420.2	1.895	0.257675	0.371656	0.705241
AT5G53800.1	1.693	0.397966	0.358702	0.502339
AT1G08420.1	1.853	0.267126	0.370286	0.689552
AT5G56590.1	1.8	0.234136	0.377873	0.743204
AT4G26965.2	1.608	0.228741	0.371866	0.748396
AT4G26965.1	1.78	0.235022	0.387707	0.75299
AT3G02885.1	1.546	0.22802	0.372829	0.75445
AT3G05880.1	1.679	0.318626	0.378297	0.626853
AT5G48630.1	1.948	0.248315	0.368626	0.715739
AT2G34585.1	1.669	0.282099	0.370422	0.6664
AT5G48230.1	1.888	0.268048	0.36939	0.686894
AT4G24330.1	1.645	0.320966	0.367354	0.609033
AT3G12955.1	1.563	0.204388	0.362429	0.78109
AT4G03415.2	1.618	0.287476	0.358583	0.643733
AT2G30530.1	1.697	0.252506	0.373939	0.714374
AT2G33860.1	2.17	0.214017	0.380519	0.776228
AT4G03415.1	1.606	0.292397	0.358382	0.636497
AT5G02290.2	1.732	0.261541	0.367909	0.695889
AT3G09770.1	1.773	0.297133	0.3611	0.631328
AT1G50300.1	1.758	0.309192	0.36199	0.612994
AT3G12600.2	1.473	0.336433	0.369409	0.593829
AT3G12600.1	1.452	0.338425	0.367275	0.589363
AT4G24470.2	1.929	0.253454	0.384235	0.723662
AT4G24470.3	1.937	0.236613	0.382299	0.748412
AT2G47550.1	2.145	0.228766	0.376856	0.752503
AT4G24470.1	1.916	0.254787	0.383359	0.72124
AT5G01460.1	1.942	0.257388	0.37493	0.705403
AT5G11680.1	1.775	0.291142	0.374266	0.656521
AT5G03345.1	1.462	0.233184	0.369126	0.736858
AT1G17980.2	2.173	0.250697	0.376474	0.717809
AT1G67900.2	1.942	0.202563	0.376191	0.79246
AT5G17630.1	2.011	0.228905	0.381557	0.756708
AT4G28650.1	2.067	0.227505	0.377809	0.756282
AT1G72480.1	1.996	0.216097	0.374371	0.770213
AT3G20260.1	1.835	0.233108	0.374865	0.746513
AT1G69060.1	1.677	0.254661	0.371478	0.708885
AT3G15660.1	1.854	0.269097	0.369904	0.686276
AT2G48160.1	1.968	0.265602	0.374842	0.693799
AT1G53210.1	1.987	0.288051	0.372695	0.659435
AT3G15660.2	1.875	0.272942	0.372746	0.683411
AT1G67900.1	1.928	0.201987	0.374153	0.79165
AT5G14430.1	1.728	0.280863	0.366531	0.662116
AT5G14430.2	1.735	0.279291	0.366743	0.664714
AT5G59880.2	1.38	0.356042	0.359571	0.556678
AT1G79080.1	1.957	0.227378	0.374717	0.752351
AT4G33480.1	1.902	0.215264	0.372873	0.771094
AT3G47370.2	1.708	0.303997	0.366195	0.625716
AT1G16470.2	1.805	0.234296	0.380677	0.748347
AT5G64880.1	1.775	0.260791	0.369803	0.69618
AT1G16470.1	1.734	0.27478	0.381504	0.686304
AT4G31890.1	1.786	0.249653	0.367193	0.712507
AT3G02040.1	1.672	0.213459	0.368582	0.770022
AT5G50210.1	1.617	0.263255	0.371373	0.693607
AT5G09443.1	1.436	0.268363	0.361195	0.679411
AT3G14980.1	2.002	0.226175	0.372307	0.753545
AT3G59500.1	1.807	0.240355	0.383598	0.741541
AT1G42990.1	2.011	0.264242	0.376884	0.698508
AT3G01090.1	2.026	0.278965	0.370161	0.668648
AT1G30840.2	1.622	0.288846	0.371918	0.655742
AT1G31150.1	1.972	0.223897	0.38502	0.766718
AT1G04300.3	1.893	0.296185	0.359958	0.633621
AT1G04300.2	1.915	0.288585	0.362031	0.64751
AT3G16370.1	2.086	0.199473	0.388867	0.808313
AT1G51570.1	1.719	0.304832	0.360437	0.622652
AT5G42060.1	1.738	0.268298	0.383521	0.697756
AT5G48385.1	2.106	0.323151	0.364947	0.60116
AT5G64220.2	2.001	0.245764	0.380456	0.728697
AT5G64220.1	1.974	0.247111	0.378871	0.725093
AT2G40430.2	1.743	0.314062	0.370596	0.620494
AT2G40430.3	1.666	0.328945	0.364117	0.592922
AT5G43020.1	1.864	0.210931	0.372664	0.776304
AT2G40430.1	1.724	0.332716	0.368611	0.592584
AT2G16405.1	1.769	0.255693	0.381049	0.713559
AT5G42100.2	1.707	0.275965	0.366132	0.672244
AT5G42100.1	1.695	0.280437	0.364998	0.664054
AT3G16310.1	1.719	0.287163	0.365268	0.648952
AT5G58470.1	1.765	0.314282	0.367715	0.616254
AT5G58470.2	1.793	0.305449	0.369405	0.630564
AT5G63670.1	1.464	0.289157	0.35969	0.64349
AT1G67900.3	1.898	0.201793	0.372271	0.790763
AT5G63670.2	1.591	0.251853	0.367655	0.706983
AT3G52520.1	1.936	0.272948	0.374047	0.675808
AT3G10670.1	1.83	0.270219	0.369963	0.684477
AT1G04900.1	1.968	0.235921	0.383602	0.749287
AT5G60710.1	1.856	0.259927	0.37785	0.707895
AT2G40410.1	1.747	0.264853	0.370127	0.690013
AT2G40410.2	1.77	0.262209	0.370119	0.694156
AT3G58970.1	1.724	0.224218	0.374088	0.758633
AT1G25250.1	2.064	0.213385	0.381197	0.78009
AT5G56650.1	1.537	0.258775	0.366543	0.69744
AT5G37790.1	1.93	0.280615	0.382222	0.681555
AT1G58180.1	1.63	0.287629	0.362964	0.651179
AT1G58180.2	1.609	0.282983	0.363	0.658815
AT1G58180.3	1.695	0.273158	0.3636	0.673813
AT1G58180.4	1.451	0.279098	0.360452	0.662378
AT5G43400.1	1.955	0.271735	0.380987	0.691613
AT5G24710.1	1.917	0.276892	0.373212	0.67543
AT3G07260.1	1.854	0.198849	0.37295	0.796174
AT3G27010.1	1.639	0.221597	0.369712	0.760296
AT1G54580.1	2.044	0.322158	0.376499	0.612103
AT5G22530.1	1.625	0.271986	0.386598	0.698575
AT2G32510.1	1.768	0.309043	0.36761	0.626701
AT5G28626.1	2.08	0.195496	0.373338	0.801792
AT2G01820.1	1.793	0.266799	0.367953	0.687231
AT2G47160.1	2.132	0.288075	0.37691	0.663433
AT1G51140.1	1.645	0.273576	0.369929	0.677874
AT2G47160.2	2.149	0.277557	0.377275	0.679478
AT5G12210.2	1.548	0.276588	0.367031	0.673866
AT5G55610.2	2.005	0.254787	0.373371	0.710746
AT5G55610.1	1.949	0.283697	0.372517	0.666211
AT5G12210.1	1.552	0.278401	0.367228	0.671343
AT1G20850.1	1.632	0.297374	0.362918	0.63575
AT2G18570.1	1.765	0.295368	0.373983	0.650836
AT1G14380.2	1.759	0.270114	0.374675	0.689504
AT1G14380.3	1.691	0.282528	0.375362	0.671963
AT1G74970.1	1.608	0.220468	0.36389	0.755089
AT1G14380.1	1.696	0.283441	0.375867	0.671232
AT1G47530.1	1.863	0.230074	0.378266	0.752328
AT3G02680.1	2.328	0.194703	0.398481	0.819426
AT3G62700.1	2.18	0.262088	0.379726	0.703603
AT2G42910.1	1.445	0.284795	0.366052	0.661401
AT1G60390.1	1.864	0.2734	0.372439	0.680023
AT4G02590.1	1.643	0.306558	0.365933	0.623633
AT3G62650.2	1.717	0.298328	0.368205	0.641761
AT3G62650.1	1.685	0.324181	0.369152	0.605592
AT5G55600.3	1.776	0.279423	0.366717	0.665892
AT3G03140.1	2.046	0.27189	0.378987	0.691412
AT5G58900.1	1.955	0.23342	0.373373	0.741727
AT1G26960.1	1.696	0.24681	0.380966	0.73012
AT1G34360.1	1.889	0.23164	0.386442	0.756658
AT4G27720.1	1.556	0.247374	0.368515	0.714942
AT2G21050.1	1.704	0.263604	0.370956	0.693971
AT3G61020.1	2.053	0.202445	0.378904	0.795777
AT3G13435.1	1.878	0.275051	0.387357	0.695094
AT5G39590.1	1.693	0.30147	0.370186	0.63791
AT3G44330.1	1.891	0.283513	0.374233	0.670211
AT2G21385.4	1.931	0.217444	0.376147	0.770582
AT2G22010.2	2.964	0.204735	0.390892	0.799739
AT4G00630.1	1.99	0.265583	0.379218	0.698231
AT4G27740.1	1.591	0.30183	0.379485	0.651387
AT5G45390.1	1.695	0.26443	0.368581	0.692168
AT1G15480.1	2.266	0.255575	0.378457	0.710242
AT1G75440.1	1.916	0.260191	0.372338	0.700426
AT5G44670.1	1.883	0.226299	0.38458	0.761747
AT2G38640.1	1.437	0.254893	0.361421	0.700323
AT3G48340.1	1.704	0.318542	0.370349	0.615237
AT4G00355.1	1.694	0.274595	0.371038	0.678398
AT4G00355.2	1.686	0.283805	0.373308	0.666679
AT4G00355.3	1.72	0.257092	0.373651	0.708026
AT4G00355.4	1.694	0.267975	0.377503	0.696004
AT3G61060.1	1.636	0.298458	0.370294	0.641726
AT3G45240.3	1.81	0.236303	0.373969	0.74044
AT3G45240.2	1.802	0.23883	0.373972	0.737217
AT3G48360.1	1.838	0.368776	0.348927	0.523352
AT3G26710.1	2.091	0.20216	0.378984	0.795793
AT4G11310.1	2.317	0.188015	0.381734	0.818479
AT5G17160.1	1.612	0.316257	0.361689	0.607368
AT3G21140.1	1.634	0.25675	0.3685	0.702665
AT5G08470.1	2.168	0.217589	0.373905	0.764235
AT1G26620.1	2.098	0.239595	0.383383	0.743654
AT2G17350.1	1.379	0.378922	0.354121	0.521251
AT1G78020.1	1.826	0.297933	0.366692	0.641168
AT5G43720.1	1.764	0.292504	0.370115	0.649943
AT1G09690.1	1.56	0.391298	0.375515	0.534566
AT4G01730.1	1.69	0.261011	0.368095	0.6948
AT3G50210.2	1.641	0.288492	0.368528	0.655278
AT3G50210.3	1.647	0.299902	0.370608	0.640736
AT5G20680.2	1.979	0.270349	0.376599	0.687424
AT3G57530.1	1.598	0.306409	0.363939	0.623902
AT5G03710.1	2.415	0.353846	0.464797	0.64529
AT4G01750.1	1.809	0.256243	0.375332	0.712061
AT3G20100.1	1.864	0.2221	0.372794	0.759204
AT5G44417.1	1.88	0.207379	0.38046	0.787415
AT1G51600.1	1.701	0.210214	0.364846	0.771216
AT5G08430.1	2.369	0.230217	0.381772	0.754951
AT1G01260.3	1.754	0.232081	0.383107	0.754493
AT1G01260.2	1.741	0.240148	0.385513	0.744388
AT1G01260.1	1.755	0.231358	0.382436	0.754927
AT5G49300.1	1.847	0.241764	0.38188	0.737227
AT4G18890.1	1.786	0.266607	0.39199	0.712104
AT1G14040.1	1.723	0.276383	0.369272	0.669934
AT5G11860.4	1.587	0.279515	0.373534	0.673373
AT4G12080.1	1.475	0.26915	0.351931	0.665055
AT5G53940.1	1.957	0.282008	0.384861	0.681308
AT5G03730.2	1.606	0.263042	0.367009	0.688444
AT5G03730.1	1.623	0.264345	0.36811	0.688036
AT3G18535.1	1.422	0.267854	0.359972	0.672479
AT3G02720.1	1.621	0.280469	0.370376	0.670485
AT5G56740.1	2.031	0.258886	0.371065	0.701554
AT5G49015.2	1.774	0.266157	0.370562	0.689735
AT5G13890.3	1.97	0.243943	0.381131	0.73392
AT2G19430.1	2.048	0.245138	0.38104	0.730401
AT5G14600.1	1.919	0.20442	0.367652	0.78481
AT3G02570.1	2.027	0.238848	0.386706	0.745918
AT2G18510.1	1.697	0.281941	0.368728	0.663405
AT1G63470.1	1.904	0.211958	0.373894	0.777115
AT5G09860.1	2.446	0.253461	0.38506	0.718983
AT5G51850.1	1.868	0.21583	0.378405	0.772303
AT5G56020.1	2.125	0.230731	0.389662	0.76133
AT3G25030.1	1.561	0.236087	0.36661	0.734005
AT2G35945.1	2.223	0.254975	0.38637	0.718177
AT1G18300.1	1.586	0.256793	0.361711	0.697183
AT2G11890.2	1.669	0.273608	0.374779	0.679984
AT4G08980.2	1.904	0.241649	0.376011	0.732713
AT4G24265.1	1.766	0.248333	0.362532	0.704628
AT4G08980.4	1.749	0.293644	0.383542	0.664356
AT1G50430.1	1.643	0.305889	0.367705	0.631476
AT1G50430.2	1.646	0.299961	0.365277	0.635972
AT5G07740.1	1.862	0.273335	0.373686	0.681311
AT5G64330.2	2.131	0.231673	0.374434	0.744563
AT3G17410.1	1.777	0.281425	0.36398	0.657014
AT5G65760.1	1.868	0.248859	0.377216	0.720671
AT1G19400.2	1.655	0.29313	0.356765	0.632977
AT4G14650.1	1.631	0.268787	0.36693	0.683564
AT1G19600.1	1.808	0.336305	0.371636	0.592544
AT3G13730.1	2.008	0.286219	0.364356	0.655332
AT3G13690.1	2.087	0.218607	0.376602	0.766677
AT5G12980.1	1.855	0.226143	0.369819	0.746932
AT1G71210.1	2.491	0.187857	0.382215	0.819487
AT1G17970.1	2.561	0.221711	0.412737	0.789926
AT3G01472.1	1.823	0.283633	0.363994	0.655301
AT3G13320.1	2	0.233133	0.379076	0.748092
AT3G21160.1	1.727	0.275872	0.368238	0.671621
AT3G58140.1	1.929	0.254216	0.385672	0.720067
AT3G01070.1	1.872	0.255472	0.384106	0.717999
AT1G76250.1	1.912	0.204216	0.382371	0.796767
AT4G37930.1	2.573	0.216846	0.374743	0.771269
AT2G31740.1	2.14	0.253963	0.383753	0.720645
AT1G13360.1	1.646	0.263993	0.368864	0.693697
AT1G13360.3	1.602	0.270799	0.366124	0.67994
AT1G13360.2	1.627	0.264129	0.367573	0.691753
AT1G09310.1	3.744	0.190561	0.41009	0.828201
AT5G15770.1	1.628	0.309349	0.403295	0.664609
AT5G38720.1	1.623	0.349356	0.354229	0.552271
AT1G14140.1	1.675	0.268528	0.382611	0.698893
AT4G29410.1	1.523	0.350161	0.350744	0.549893
AT3G59068.1	2.32	0.188478	0.422337	0.844874
AT4G12340.1	1.625	0.332782	0.364955	0.590649
AT5G19150.1	1.894	0.24166	0.374243	0.730387
AT5G19150.2	1.832	0.242689	0.370931	0.726287
AT1G13340.1	1.648	0.23613	0.364073	0.730068
AT5G50440.1	2.057	0.248455	0.386541	0.727988
AT3G11320.1	2.352	0.224253	0.386007	0.765744
AT3G22260.2	1.964	0.243306	0.377037	0.730391
AT3G22260.3	1.908	0.244013	0.373144	0.725679
AT3G22260.1	1.964	0.245883	0.379445	0.729242
AT3G15070.1	1.808	0.264046	0.375272	0.697302
AT1G66150.1	2.189	0.237306	0.384873	0.748559
AT1G03090.2	1.646	0.300159	0.365339	0.635942
AT3G15190.1	1.955	0.237662	0.373488	0.736648
AT1G03090.1	1.67	0.294639	0.366162	0.64418
AT5G50960.1	1.56	0.287563	0.366955	0.658501
AT3G04930.2	1.915	0.289401	0.364608	0.648589
AT4G25890.1	1.576	0.296952	0.377075	0.653166
AT3G04930.1	1.9	0.304844	0.363085	0.624406
AT3G22480.2	1.744	0.329393	0.363202	0.588919
AT3G22480.1	1.676	0.315384	0.362275	0.606093
AT1G68850.1	1.886	0.251167	0.362927	0.704755
AT1G70670.1	1.485	0.303618	0.367507	0.633305
AT1G30970.2	1.713	0.271213	0.371958	0.684408
AT1G30970.1	1.72	0.284439	0.373998	0.667096
AT1G17410.1	1.963	0.220005	0.386634	0.772168
AT5G05200.1	2.037	0.217741	0.370815	0.763871
AT1G25053.1	1.512	0.261463	0.380077	0.70955
AT1G07930.1	1.77	0.404545	0.354062	0.492598
AT3G22570.1	3.199	0.238755	0.404939	0.751349
AT4G39780.1	1.816	0.226596	0.368008	0.750338
AT2G16900.1	1.899	0.25164	0.374092	0.717768
AT5G45790.2	1.6	0.257981	0.376722	0.707992
AT2G16900.3	1.86	0.265051	0.3751	0.698709
AT2G16900.2	1.767	0.290843	0.373981	0.659529
AT1G73180.2	1.81	0.262839	0.368141	0.693736
AT1G04780.1	1.839	0.281077	0.365945	0.659785
AT2G29540.1	1.628	0.31504	0.377358	0.629669
AT5G50315.1	1.711	0.239789	0.377062	0.738922
AT5G35450.1	1.716	0.277497	0.373874	0.677819
AT1G75630.2	1.804	0.216457	0.374532	0.772158
AT1G75630.1	1.534	0.30354	0.366761	0.632758
AT1G10450.1	1.689	0.26682	0.379024	0.694854
AT5G20290.1	1.521	0.407169	0.358794	0.495266
AT5G13680.1	2.204	0.254819	0.383002	0.7177
AT5G09860.2	2.46	0.255424	0.385973	0.716832
AT1G72650.1	2.008	0.265064	0.374617	0.693255
AT2G05250.1	1.961	0.272992	0.366304	0.673894
AT5G43540.1	1.592	0.300039	0.363002	0.631171
AT1G53110.1	1.833	0.228222	0.374582	0.751751
AT2G28590.1	2.135	0.239116	0.376949	0.735406
AT3G52105.1	1.611	0.208765	0.37097	0.780454
AT1G06130.2	2.018	0.254519	0.383265	0.716675
AT5G51960.1	1.845	0.246843	0.387188	0.735664
AT3G09920.1	1.602	0.276373	0.366205	0.671004
AT2G01670.1	2.006	0.320793	0.375094	0.615283
AT3G56310.1	1.58	0.312843	0.363369	0.613201
AT3G56310.2	1.596	0.301967	0.364092	0.628199
AT2G32180.1	1.984	0.278835	0.397348	0.697127
AT1G77020.1	1.742	0.261545	0.370511	0.696865
AT4G36210.1	1.705	0.270228	0.367389	0.68153
AT1G78040.2	1.555	0.422009	0.352003	0.470068
AT4G36210.3	1.679	0.285932	0.366107	0.656214
AT5G59440.1	1.638	0.284804	0.360856	0.650795
AT3G07640.1	1.601	0.248012	0.377804	0.724736
AT5G61420.1	1.68	0.269327	0.367734	0.682943
AT1G80670.1	1.756	0.264691	0.379849	0.702421
AT1G25530.1	2.026	0.257775	0.372698	0.705517
AT4G13640.2	1.914	0.254291	0.371101	0.70932
AT4G13640.1	1.967	0.256521	0.367626	0.702479
AT5G13240.1	1.454	0.229581	0.369869	0.746259
AT4G38710.2	1.712	0.359377	0.363743	0.552767
AT3G07660.1	1.932	0.272184	0.369335	0.679512
AT4G31130.1	1.668	0.248446	0.362761	0.709981
AT5G51410.2	2.147	0.262268	0.38216	0.706019
AT3G04570.1	1.742	0.300278	0.360153	0.626048
AT3G60590.4	1.783	0.218833	0.373469	0.76639
AT3G15360.1	1.73	0.213531	0.37115	0.773136
AT1G17340.1	1.895	0.242455	0.379917	0.73517
AT3G09890.1	1.508	0.271085	0.36174	0.672174
AT4G22756.1	1.77	0.200876	0.365521	0.787597
AT2G21470.3	1.749	0.256535	0.381134	0.716504
AT2G21470.2	1.801	0.243443	0.381695	0.737667
AT2G21470.1	1.732	0.262546	0.38072	0.707137
AT5G49160.1	2.115	0.269958	0.369641	0.682088
AT3G51140.1	2.207	0.206573	0.392752	0.7998
AT2G02560.2	2.187	0.26155	0.380195	0.703402
AT1G23820.1	1.546	0.318897	0.364263	0.609735
AT2G02560.1	2.176	0.261931	0.379546	0.702137
AT5G01200.1	2.014	0.247947	0.37492	0.720542
AT2G35630.1	1.901	0.303221	0.367416	0.632205
AT3G02260.1	2.565	0.219876	0.376988	0.765654
AT1G61210.2	1.879	0.222953	0.374829	0.760026
AT5G60670.1	1.53	0.348935	0.353887	0.553034
AT5G41700.5	1.839	0.261857	0.373491	0.702452
AT2G25090.1	1.645	0.229342	0.369012	0.747609
AT5G41700.1	1.693	0.345992	0.369083	0.579143
AT3G44100.1	1.851	0.305431	0.374235	0.636717
AT5G41700.3	1.627	0.28802	0.366167	0.654621
AT2G37230.1	1.629	0.304527	0.363524	0.625597
AT1G18040.1	1.981	0.248974	0.390197	0.732735
AT3G16060.1	1.654	0.306513	0.361375	0.620921
AT3G13860.1	1.66	0.294298	0.368937	0.648139
AT4G25810.1	1.564	0.254049	0.371242	0.709699
AT1G06470.2	1.874	0.21926	0.377115	0.766071
AT3G10220.1	1.558	0.277328	0.355524	0.654246
AT3G59970.1	1.476	0.308245	0.357192	0.613888
AT1G80230.1	2.221	0.307208	0.36715	0.624869
AT3G59970.3	1.456	0.327001	0.356301	0.58748
AT2G31020.1	1.779	0.279519	0.373804	0.673728
AT1G14230.1	1.778	0.244674	0.378732	0.728967
AT4G21670.1	2.319	0.233882	0.386146	0.751616
AT2G20950.4	1.788	0.249159	0.365512	0.709874
AT1G73730.1	2.65	0.230836	0.392742	0.756708
AT4G08470.1	2.093	0.217937	0.379455	0.77101
AT1G22790.1	1.506	0.252157	0.364575	0.708218
AT1G22790.2	1.495	0.257586	0.363299	0.698111
AT5G27470.1	1.704	0.326904	0.361626	0.594411
AT3G06390.1	1.357	0.32182	0.35555	0.595612
AT3G58470.1	1.421	0.264017	0.369606	0.692574
AT1G55020.1	1.657	0.295919	0.3608	0.635286
AT1G56300.1	2.068	0.243038	0.380548	0.736299
AT1G21920.1	1.896	0.280895	0.364227	0.658111
AT4G09000.2	1.816	0.321857	0.362247	0.601197
AT4G09000.1	1.797	0.358891	0.357095	0.546372
AT5G60800.2	1.908	0.295456	0.363109	0.635665
AT5G43190.1	1.866	0.26919	0.376082	0.690879
AT5G60800.1	1.955	0.309315	0.366188	0.619242
AT4G25130.1	1.743	0.282223	0.372474	0.668868
AT2G47470.4	1.561	0.390215	0.356602	0.511491
AT2G47470.3	1.57	0.388359	0.35805	0.515356
AT5G03070.1	1.93	0.227254	0.379828	0.757508
AT2G47470.1	1.564	0.404493	0.354437	0.492133
AT5G04990.1	1.534	0.291812	0.357974	0.640191
AT3G46430.1	1.302	0.284453	0.349888	0.638795
AT3G05230.2	1.683	0.266066	0.386504	0.704546
AT5G40090.1	2.383	0.213381	0.399238	0.790922
AT5G23290.1	1.617	0.331702	0.375837	0.602559
AT3G47860.1	2.475	0.19596	0.386121	0.811148
AT3G27740.1	1.75	0.26822	0.365035	0.678439
AT2G26970.2	2.38	0.276943	0.378105	0.678912
AT2G26970.1	2.354	0.302245	0.37553	0.637982
AT1G53390.1	2.408	0.241619	0.384154	0.736605
AT5G64560.1	1.78	0.24686	0.37941	0.72714
AT3G50030.1	2.599	0.185819	0.411993	0.838229
AT2G40370.1	2.179	0.272775	0.387043	0.693952
AT4G20960.1	2.211	0.232586	0.393218	0.758443
AT3G28510.1	1.635	0.277233	0.364502	0.666736
AT2G39770.1	1.878	0.303647	0.369365	0.631204
AT4G12460.1	2.256	0.25908	0.380258	0.708998
AT4G12460.2	2.32	0.248587	0.381472	0.726069
AT2G39770.2	1.864	0.304546	0.36845	0.628896
AT4G32850.8	1.83	0.310199	0.368007	0.622982
AT1G72690.1	1.396	0.278157	0.36016	0.655861
AT2G16720.1	1.954	0.295219	0.37019	0.647023
AT1G34220.2	2.033	0.247521	0.384371	0.732306
AT1G27380.1	1.655	0.213793	0.366062	0.768009
AT1G27380.2	1.555	0.24082	0.361093	0.720297
AT2G27040.1	1.743	0.232387	0.371807	0.744497
AT2G27040.2	1.762	0.228363	0.371861	0.750659
AT3G58780.3	7	0.162565	0.768084	0.958731
AT5G46180.1	1.797	0.238495	0.379133	0.739855
AT5G63940.1	2.177	0.289866	0.371703	0.655005
AT4G19490.1	1.979	0.246813	0.375398	0.725324
AT4G19490.2	1.999	0.243297	0.375403	0.730704
AT5G01260.2	2.112	0.233704	0.372615	0.738746
AT5G01260.1	1.958	0.217188	0.382565	0.773525
AT3G12030.1	2.017	0.279497	0.37184	0.666126
AT5G61330.1	1.688	0.322077	0.359378	0.595202
AT1G12650.2	1.68	0.281076	0.364327	0.658824
AT1G12650.3	1.737	0.279183	0.37009	0.668181
AT2G28290.1	1.982	0.267407	0.374954	0.691912
AT1G12650.1	1.738	0.274796	0.369119	0.673754
AT5G19910.2	1.695	0.205821	0.365741	0.782756
AT1G03210.1	1.56	0.266508	0.368215	0.690035
AT1G12650.4	1.737	0.27608	0.370494	0.67306
AT3G12050.2	1.763	0.300097	0.372464	0.64215
AT5G11640.1	2.114	0.2597	0.37701	0.705375
AT3G23820.1	1.602	0.32256	0.357843	0.59523
AT3G12050.1	1.696	0.317935	0.366495	0.610742
AT3G08890.1	1.673	0.254808	0.371616	0.710737
AT3G08890.2	1.759	0.235255	0.3703	0.739902
AT5G02530.2	1.783	0.292396	0.369754	0.644793
AT2G33550.1	1.713	0.322263	0.356858	0.593575
AT5G02530.1	1.814	0.313902	0.372576	0.62054
AT4G09340.1	2.135	0.215989	0.387656	0.778872
AT1G72040.1	1.88	0.264546	0.375629	0.696835
AT1G04280.1	1.802	0.267129	0.363531	0.679643
AT5G10750.1	1.807	0.270715	0.384309	0.694704
AT2G03830.1	1.97	0.192262	0.37721	0.809835
AT1G29380.1	1.682	0.221067	0.367894	0.75672
AT2G23080.1	1.86	0.261284	0.367107	0.693161
AT2G23080.2	1.855	0.234829	0.365784	0.733537
AT4G00890.1	1.725	0.270309	0.369964	0.684205
AT3G62800.3	1.821	0.214685	0.380249	0.778564
AT1G01910.5	1.643	0.267022	0.369995	0.688
AT1G01910.4	1.657	0.264685	0.369665	0.69135
AT5G10770.1	1.973	0.235697	0.380838	0.746421
AT1G54390.6	1.726	0.269447	0.374882	0.686854
AT1G01910.1	1.614	0.279803	0.368022	0.665696
AT1G01910.3	1.694	0.272454	0.373235	0.682843
AT1G01910.2	1.637	0.29074	0.370808	0.652634
AT2G27290.1	1.758	0.230704	0.378987	0.753781
AT4G01280.1	1.719	0.29347	0.371948	0.65202
AT4G01280.2	1.709	0.299666	0.372539	0.644117
AT5G20170.1	2.231	0.242423	0.382659	0.733748
AT3G12970.1	2.181	0.242376	0.400813	0.751537
AT4G31300.3	1.575	0.297828	0.365167	0.640354
AT3G13810.1	1.861	0.254941	0.370873	0.707453
AT1G06890.1	2.241	0.273752	0.382079	0.688025
AT5G27410.2	2.086	0.255894	0.374347	0.708438
AT3G13810.2	1.853	0.23819	0.371631	0.735426
AT2G12462.1	1.44	0.301348	0.363696	0.633059
AT4G31300.1	1.542	0.318927	0.363203	0.609013
AT3G16570.1	1.951	0.260741	0.385917	0.714342
AT1G61240.3	1.802	0.220969	0.37926	0.768038
AT1G61240.2	1.777	0.223222	0.377309	0.76273
AT1G61240.1	1.782	0.219825	0.37639	0.767307
AT1G06890.2	2.235	0.271427	0.380624	0.689775
AT1G61240.4	1.831	0.211371	0.377212	0.781269
AT2G20190.1	1.897	0.261819	0.377656	0.70371
AT3G61210.1	1.814	0.231077	0.381011	0.751356
AT5G27990.1	1.651	0.292862	0.35745	0.63721
AT3G04080.1	1.961	0.246265	0.376752	0.726685
AT2G41710.1	1.777	0.293016	0.359856	0.637655
AT2G41710.2	1.795	0.28233	0.359869	0.652891
AT2G16280.1	1.765	0.221318	0.36745	0.757357
AT5G05640.1	2.135	0.247333	0.39265	0.735389
AT3G43520.1	1.555	0.295064	0.366535	0.644721
AT2G01913.1	1.724	0.233987	0.375792	0.744997
AT4G39180.1	1.964	0.237724	0.382365	0.745474
AT4G30390.1	1.755	0.242028	0.373618	0.727562
AT5G59160.1	1.562	0.267389	0.371086	0.690851
AT3G17430.1	1.816	0.206775	0.370079	0.78239
AT4G18430.1	1.795	0.221549	0.369942	0.759976
AT5G38560.1	1.782	0.274765	0.364472	0.671312
AT3G24490.1	1.666	0.356068	0.359499	0.551646
AT1G23100.1	1.753	0.229314	0.378015	0.751527
AT3G02450.1	1.97	0.231689	0.380919	0.750885
AT1G77510.1	1.8	0.256833	0.380746	0.716256
AT5G54770.1	2.281	0.210982	0.366922	0.771939
AT2G45680.1	1.89	0.231718	0.381949	0.751476
AT1G27150.1	1.664	0.288444	0.371249	0.660197
AT5G28920.1	2.956	0.150711	0.40056	0.885136
AT1G15030.1	1.72	0.258358	0.377043	0.704842
AT5G41360.1	1.898	0.246766	0.371879	0.720308
AT1G76220.1	1.94	0.22695	0.384098	0.762016
AT3G47490.1	1.835	0.217646	0.369582	0.763809
AT4G19110.1	1.963	0.297177	0.370186	0.641281
AT4G19110.3	1.805	0.296937	0.36231	0.632383
AT4G19110.2	1.97	0.297034	0.370949	0.642441
AT3G07860.1	1.513	0.268729	0.371185	0.689542
AT5G19190.1	1.548	0.255022	0.359493	0.693531
AT2G04390.1	1.638	0.35055	0.358075	0.56032
AT4G34800.1	2.072	0.275838	0.405394	0.705887
AT4G37940.1	1.502	0.313913	0.36666	0.619288
AT1G77350.2	2.238	0.263033	0.396754	0.716638
AT1G77350.1	2.195	0.272955	0.391536	0.697407
AT5G12470.1	2.008	0.293924	0.372694	0.651529
AT3G13440.1	1.947	0.305372	0.369461	0.631981
AT1G64990.1	1.928	0.269064	0.383024	0.697891
AT1G64990.2	1.961	0.268908	0.385727	0.700971
AT3G50640.1	1.757	0.297383	0.370883	0.644996
AT4G38510.1	1.914	0.320048	0.364179	0.603239
AT4G38510.2	1.919	0.318511	0.364842	0.606424
AT4G38510.3	1.931	0.315906	0.367498	0.61319
AT4G38510.4	1.93	0.318956	0.365791	0.606664
AT4G38510.5	1.918	0.305683	0.365808	0.625977
AT1G68260.1	1.501	0.246931	0.370187	0.720914
AT1G57680.2	1.942	0.264635	0.359654	0.677397
AT1G61450.1	1.685	0.277615	0.384659	0.688276
AT1G57680.1	1.986	0.272483	0.364287	0.670794
AT1G55340.1	1.563	0.303994	0.361928	0.624799
AT1G55340.2	1.555	0.301122	0.359382	0.626329
AT5G51300.1	2.038	0.267673	0.369254	0.684857
AT5G51300.3	2.02	0.266758	0.368346	0.685553
AT5G51300.2	2.003	0.27334	0.369984	0.677777
AT2G17820.1	1.929	0.271584	0.376001	0.687434
AT2G34750.1	1.756	0.280177	0.367966	0.663437
AT4G09320.1	1.428	0.337571	0.357513	0.573944
AT2G38290.1	1.89	0.208083	0.378492	0.786787
AT5G59160.2	1.709	0.250277	0.380693	0.726119
AT2G38290.2	1.974	0.197274	0.38122	0.805997
AT5G52560.1	1.897	0.211798	0.37354	0.775617
AT5G16220.1	1.722	0.274508	0.361205	0.667579
AT5G10810.1	1.887	0.298874	0.380124	0.651373
AT5G09410.1	2.014	0.244833	0.385143	0.735671
AT5G09410.2	2.011	0.248929	0.386147	0.730345
AT5G09410.3	2.081	0.217994	0.379121	0.771359
AT3G61415.2	1.596	0.2232	0.360193	0.74786
AT1G10650.1	1.695	0.241717	0.373488	0.730997
AT1G10650.2	1.726	0.224367	0.373039	0.758692
AT1G10840.2	1.74	0.259235	0.369516	0.699613
AT1G80690.1	1.892	0.221812	0.38065	0.76722
AT3G62900.1	2.142	0.250452	0.373733	0.716558
AT4G03190.1	1.777	0.264472	0.371172	0.69244
AT3G07460.2	1.925	0.231371	0.380344	0.752174
AT1G15420.1	2.15	0.329314	0.388644	0.614392
AT2G39300.2	1.683	0.274105	0.373529	0.68142
AT1G24340.1	2.707	0.217951	0.389258	0.77776
AT5G19090.1	1.79	0.305303	0.364709	0.626145
AT3G18140.2	1.649	0.239936	0.361688	0.724235
AT3G26420.1	2.285	0.219828	0.379625	0.769609
AT5G56320.1	1.749	0.256507	0.371466	0.706788
AT1G15440.2	1.736	0.253344	0.382011	0.720003
AT3G46450.2	1.885	0.211969	0.373685	0.778342
AT3G46450.1	1.885	0.217475	0.37521	0.770694
AT2G39360.1	2.257	0.195655	0.384764	0.812583
AT3G09970.1	1.943	0.22694	0.381495	0.760292
AT3G15390.1	2.181	0.239548	0.369981	0.73037
AT2G45540.1	2.294	0.240083	0.384786	0.742347
AT5G47710.1	2.142	0.306457	0.379923	0.633063
AT2G45540.2	2.3	0.232474	0.383015	0.752585
AT3G15390.2	2.067	0.26937	0.375207	0.691276
AT3G14075.1	2.216	0.22122	0.381387	0.765891
AT3G01910.2	2.128	0.318132	0.366659	0.607985
AT3G09630.2	1.798	0.370802	0.36661	0.543256
AT2G39090.2	1.839	0.266643	0.383854	0.702907
AT3G54430.1	1.754	0.263051	0.371929	0.696703
AT2G20130.1	1.822	0.252147	0.370365	0.708876
AT1G63440.1	1.714	0.26524	0.369887	0.690501
AT5G41150.1	1.988	0.227683	0.383732	0.760604
AT2G42320.1	1.832	0.262906	0.384811	0.709659
AT2G42320.2	1.866	0.2592	0.384276	0.713794
AT5G47710.2	2.144	0.276296	0.38515	0.685311
AT4G25740.2	1.889	0.269178	0.377232	0.687595
AT4G25740.1	1.81	0.30119	0.373236	0.638261
AT4G38350.1	1.683	0.253203	0.36872	0.708486
AT1G64740.1	1.826	0.233148	0.376092	0.743504
AT5G48030.1	1.731	0.270396	0.373227	0.687585
AT3G51930.1	1.911	0.264929	0.388894	0.708826
AT5G44572.1	1.626	0.233891	0.366268	0.732877
AT5G66510.2	1.494	0.259319	0.362016	0.690572
AT4G09730.1	1.718	0.282061	0.374299	0.669913
AT3G21295.1	2.032	0.246099	0.380001	0.728407
AT5G66510.1	1.482	0.275801	0.360379	0.66228
AT2G15570.1	1.512	0.267729	0.360974	0.678458
AT1G54170.1	2.066	0.276496	0.372564	0.674338
AT1G06225.1	1.48	0.270082	0.391438	0.705864
AT2G15570.2	1.753	0.262675	0.367295	0.691467
AT3G02900.1	1.682	0.286584	0.369767	0.660306
AT3G02900.2	1.734	0.256424	0.369979	0.705726
AT4G34230.1	1.554	0.341474	0.35849	0.572096
AT3G60590.1	1.786	0.217928	0.373108	0.767657
AT1G29470.2	1.476	0.36415	0.356775	0.542894
AT5G56940.1	1.801	0.305177	0.371493	0.63113
AT1G25275.3	1.664	0.233566	0.35814	0.725761
AT1G25275.2	1.628	0.30119	0.373126	0.642038
AT1G25275.1	1.623	0.299317	0.364907	0.632653
AT1G53430.2	1.923	0.243778	0.371201	0.725548
AT5G40550.2	1.722	0.228161	0.372699	0.751044
AT3G23150.1	1.939	0.225552	0.376045	0.757871
AT5G40550.1	1.638	0.229323	0.366808	0.742384
AT3G15640.2	1.62	0.294217	0.364402	0.642081
AT3G15640.1	1.616	0.298743	0.362771	0.632468
AT4G32290.1	1.822	0.269856	0.369713	0.683813
AT1G15860.2	1.682	0.268739	0.373414	0.692098
AT1G01040.2	2.443	0.241688	0.381673	0.737155
AT5G14030.4	1.565	0.284781	0.366757	0.65903
AT2G46170.2	2.516	0.214819	0.416671	0.800237
AT5G14030.1	1.56	0.317622	0.362004	0.605112
AT5G14030.2	1.563	0.284755	0.366981	0.659718
AT5G14030.3	1.568	0.286698	0.367028	0.656368
AT4G36920.2	1.799	0.247153	0.377981	0.728282
AT4G36920.1	1.766	0.265051	0.378996	0.701922
AT3G02080.1	1.495	0.353875	0.367945	0.56881
AT5G14050.1	1.664	0.29062	0.373053	0.658022
AT2G16880.1	2.1	0.230224	0.37853	0.750147
AT1G69640.1	1.656	0.255747	0.369022	0.702444
AT3G18000.1	1.777	0.254289	0.372469	0.711046
AT3G12990.3	2.349	0.282323	0.389252	0.68085
AT3G12990.2	2.349	0.28478	0.390452	0.678759
AT5G57490.1	1.89	0.320535	0.37169	0.611132
AT3G13870.2	1.803	0.325515	0.363527	0.596719
AT3G13870.1	1.786	0.331901	0.361593	0.585578
AT1G53165.2	1.785	0.252687	0.363423	0.702683
AT1G53165.3	1.995	0.249638	0.365642	0.708621
AT4G29910.1	1.931	0.230935	0.38111	0.752245
AT1G56680.1	1.651	0.25176	0.387467	0.728265
AT5G07780.1	2.325	0.224883	0.37898	0.762195
AT2G27210.1	2.087	0.25343	0.384788	0.72184
AT2G13370.1	1.872	0.273883	0.37189	0.679725
AT2G47070.1	1.787	0.256912	0.361033	0.692081
AT2G27210.2	2.118	0.239512	0.382923	0.741518
AT2G30930.1	1.901	0.350896	0.35996	0.552892
AT5G57480.1	1.584	0.318529	0.367679	0.610323
AT1G23950.4	1.782	0.275491	0.374076	0.679834
AT5G65460.1	1.933	0.255312	0.37988	0.714515
AT3G08530.1	1.874	0.308217	0.363976	0.621086
AT5G14970.1	1.801	0.241322	0.373975	0.732896
AT2G41160.1	1.996	0.260415	0.376387	0.701891
AT5G15810.1	2.017	0.258392	0.364217	0.695285
AT1G01670.1	1.881	0.203032	0.377246	0.793879
AT1G21200.1	2.177	0.266558	0.375377	0.694315
AT2G27950.1	1.958	0.273407	0.371839	0.680996
AT1G53570.3	2.225	0.224281	0.378562	0.762022
AT5G45700.1	1.497	0.267518	0.375379	0.695869
AT5G01390.2	1.852	0.254078	0.383751	0.720565
AT2G36620.1	1.541	0.373225	0.360151	0.535444
AT1G47840.1	1.613	0.32687	0.359338	0.588424
AT3G06350.1	1.647	0.27165	0.358743	0.668221
AT2G35620.1	1.863	0.236509	0.382883	0.747344
AT1G66820.1	1.859	0.233399	0.39017	0.75843
AT2G28840.1	1.854	0.322117	0.359969	0.595227
AT1G18590.1	1.683	0.261116	0.367651	0.695457
AT2G28840.2	1.546	0.309721	0.363416	0.618386
AT5G08139.1	1.785	0.290771	0.36399	0.646424
AT1G70570.1	2.067	0.290553	0.36433	0.644376
AT4G35800.1	2.11	0.287786	0.365629	0.650447
AT2G27970.1	1.594	0.279281	0.36569	0.665771
AT1G23380.1	1.739	0.213111	0.370697	0.772692
AT1G30730.1	1.717	0.281915	0.370394	0.668298
AT5G41520.1	1.492	0.355137	0.34991	0.540213
AT5G53290.1	1.818	0.22274	0.376302	0.763266
AT3G63450.3	1.946	0.261392	0.383504	0.705376
AT4G39220.1	1.538	0.270597	0.358102	0.671326
AT4G25280.1	1.932	0.262012	0.383956	0.709676
AT4G22690.1	1.796	0.255496	0.358533	0.6926
AT3G17800.2	1.826	0.265752	0.373998	0.694632
AT4G24090.1	1.768	0.258789	0.371392	0.703641
AT1G65510.1	1.61	0.272825	0.375083	0.684573
AT3G17800.1	1.807	0.272355	0.373101	0.683551
AT1G77670.1	1.667	0.246051	0.384734	0.735444
AT3G55990.1	1.735	0.27625	0.375353	0.679546
AT4G17310.2	2.377	0.190471	0.397642	0.827295
AT1G08770.1	1.908	0.232092	0.379133	0.748955
AT3G47680.1	1.781	0.277394	0.364988	0.666299
AT1G11150.1	2.144	0.122518	0.362697	0.904467
AT2G45960.2	1.805	0.32007	0.364617	0.603631
AT3G20080.1	1.537	0.210885	0.360332	0.766282
AT3G49730.1	1.82	0.280064	0.374188	0.671857
AT3G20080.3	1.865	0.228604	0.373292	0.750672
AT1G20780.1	2.172	0.206652	0.377036	0.785438
AT2G45960.1	1.768	0.344449	0.355288	0.557559
AT4G15000.1	1.721	0.379034	0.352531	0.51416
AT1G09010.1	1.83	0.273543	0.369355	0.678191
AT3G06740.1	1.775	0.279077	0.381648	0.68021
AT5G05860.1	1.8	0.203845	0.366228	0.78458
AT2G09795.3	2.602	0.237611	0.40301	0.751785
AT4G37130.1	1.934	0.234631	0.379344	0.74663
AT2G46680.2	2.12	0.290137	0.37243	0.655328
AT4G32780.1	1.6	0.299844	0.366721	0.63925
AT3G43980.1	1.32	0.295938	0.345864	0.618864
AT1G71692.1	1.867	0.277309	0.394936	0.698801
AT5G15440.1	1.684	0.219027	0.371081	0.761619
AT3G60410.3	1.863	0.24318	0.380756	0.735394
AT2G19680.2	1.337	0.258239	0.357778	0.690877
AT1G03420.1	1.919	0.234064	0.38294	0.746766
AT5G44635.1	2.04	0.231021	0.383636	0.754548
AT1G21610.3	1.925	0.254273	0.370072	0.706375
AT1G11630.1	1.766	0.230379	0.375406	0.749526
AT3G48970.1	2.08	0.302437	0.383567	0.645169
AT5G07440.1	1.589	0.309342	0.358253	0.610891
AT4G14040.1	2.008	0.246969	0.384939	0.731327
AT5G07440.3	1.616	0.282737	0.359974	0.650639
AT5G07440.2	1.575	0.309118	0.358061	0.611321
AT5G51380.1	1.956	0.254437	0.380915	0.716381
AT1G52320.2	1.716	0.267522	0.366793	0.682616
AT5G48940.1	2.165	0.238283	0.389096	0.745442
AT3G09570.1	1.79	0.254944	0.379983	0.717141
AT1G52320.3	1.643	0.244301	0.363139	0.716002
AT2G04340.1	1.407	0.258606	0.361805	0.695
AT1G68300.1	1.993	0.325669	0.367996	0.597144
AT1G70520.1	2.039	0.275889	0.375435	0.67935
AT5G64070.1	1.755	0.274752	0.367422	0.673912
AT1G04240.1	2.183	0.303658	0.3655	0.626477
AT1G01510.1	1.583	0.296562	0.365899	0.638281
AT4G17085.1	1.654	0.242522	0.401829	0.754236
AT3G08510.3	1.728	0.303018	0.36217	0.62639
AT5G19530.1	1.588	0.32887	0.362186	0.59003
AT1G24851.1	2.131	0.236627	0.383753	0.746452
AT2G34560.1	1.711	0.291775	0.36417	0.645063
AT3G17310.2	1.713	0.237084	0.374894	0.736712
AT3G17310.1	1.722	0.231082	0.373528	0.74518
AT2G32710.2	1.902	0.239102	0.378902	0.736763
AT2G32710.1	1.952	0.249926	0.38163	0.723729
AT5G06910.1	1.864	0.306698	0.368816	0.628508
AT3G14172.1	1.838	0.295249	0.367134	0.642858
AT2G06010.1	2.138	0.267655	0.393631	0.711686
AT4G29430.1	1.738	0.308678	0.378749	0.63489
AT4G13860.1	1.675	0.28883	0.345377	0.618393
AT1G24793.1	1.6	0.297742	0.362102	0.634192
AT1G24793.2	1.667	0.299097	0.367421	0.63795
AT3G05950.1	1.669	0.383465	0.35975	0.518473
AT3G14172.2	1.83	0.293017	0.366065	0.644715
AT2G32730.1	1.981	0.299731	0.357247	0.624489
AT1G11360.2	1.719	0.277381	0.373675	0.677335
AT4G23570.2	2.143	0.254818	0.382583	0.719294
AT4G23570.3	2.18	0.254067	0.38565	0.723056
AT2G31810.2	1.981	0.305753	0.362447	0.623356
AT4G23570.1	2.159	0.252761	0.383896	0.723691
AT5G17020.2	1.861	0.262913	0.372922	0.697401
AT2G04850.1	2.098	0.227565	0.381523	0.758267
AT5G17020.1	1.843	0.263012	0.371244	0.695586
AT5G57880.1	2.453	0.176854	0.397936	0.847117
AT4G26270.1	2.012	0.230149	0.382384	0.753955
AT4G15450.1	1.732	0.282974	0.381506	0.676422
AT3G20640.1	1.704	0.247496	0.362415	0.710083
AT3G07360.2	1.592	0.312513	0.365335	0.617114
AT3G07360.3	1.576	0.313239	0.363753	0.614212
AT3G07360.1	1.586	0.321888	0.36671	0.606441
AT3G21200.1	1.653	0.207886	0.368502	0.781423
AT1G67325.2	1.681	0.225281	0.363877	0.749116
AT1G67325.1	1.673	0.272174	0.358195	0.66695
AT1G78240.2	1.905	0.248084	0.377289	0.724551
AT5G49760.1	1.947	0.224391	0.371923	0.756935
AT4G25360.1	1.977	0.244372	0.380643	0.732911
AT4G25360.2	1.965	0.238991	0.379204	0.74035
AT3G14830.2	2.176	0.218744	0.373809	0.764141
AT1G71860.3	1.739	0.265229	0.365116	0.685682
AT3G14830.1	2.141	0.232349	0.375954	0.744288
AT4G32270.1	1.798	0.222739	0.371222	0.75348
AT5G12120.1	1.561	0.3167	0.354856	0.598513
AT4G00300.2	1.527	0.236596	0.373504	0.742301
AT4G00300.1	1.76	0.148014	0.354866	0.867235
AT3G47000.1	1.699	0.287591	0.369028	0.656702
AT3G63190.1	1.688	0.239868	0.36868	0.728609
AT2G46690.1	1.547	0.282072	0.36112	0.655534
AT2G39990.1	1.558	0.277304	0.367357	0.670834
AT5G57090.1	1.799	0.261859	0.36819	0.693153
AT1G63460.1	1.736	0.263855	0.374794	0.696961
AT1G10820.2	2.023	0.266723	0.369628	0.68731
AT1G10820.1	2.063	0.256323	0.371272	0.704663
AT3G01930.2	1.7	0.236998	0.37872	0.741036
AT1G51060.1	1.517	0.329026	0.36827	0.600274
AT2G29995.1	1.502	0.242987	0.357189	0.71423
AT4G32260.1	2.069	0.228016	0.37694	0.755051
AT1G59900.1	2.032	0.309524	0.370385	0.623515
AT1G06780.1	1.874	0.247531	0.370915	0.718362
AT5G47890.1	1.793	0.353146	0.366095	0.55801
AT1G63980.2	1.75	0.344661	0.360142	0.565904
AT2G34357.1	2.086	0.260902	0.381701	0.705518
AT3G01090.3	2.064	0.262902	0.371261	0.694079
AT4G32720.1	1.793	0.327236	0.355335	0.580526
AT4G23820.1	1.953	0.249128	0.384445	0.730263
AT2G47980.1	1.69	0.279619	0.368376	0.668542
AT4G32720.2	1.811	0.31297	0.359825	0.60593
AT3G49645.1	1.583	0.234067	0.365493	0.734259
ATCG01120.1	1.666	0.194283	0.380855	0.8124
AT3G56990.1	1.963	0.285222	0.375439	0.668002
AT5G62200.1	1.887	0.245464	0.373749	0.722879
AT4G01560.1	1.564	0.293021	0.364927	0.644243
AT3G20830.1	1.933	0.254971	0.388931	0.72397
AT3G57870.1	1.605	0.313031	0.365133	0.616366
AT5G25780.1	2.08	0.294853	0.366598	0.641372
AT1G54060.1	1.816	0.271324	0.370643	0.680748
AT4G00720.1	2.052	0.312437	0.373149	0.622559
AT3G62010.1	1.91	0.265903	0.370086	0.689965
AT1G62880.1	1.543	0.2273	0.364827	0.74766
AT1G56045.1	1.448	0.349986	0.366882	0.568431
AT3G12010.1	2.266	0.233099	0.385082	0.753779
AT5G15870.1	1.697	0.261051	0.374123	0.702706
AT3G11530.2	2.313	0.173148	0.369356	0.834928
AT5G55160.1	1.541	0.320186	0.35519	0.593785
AT1G15470.1	1.945	0.249068	0.386108	0.730195
AT5G55160.2	1.41	0.304466	0.36317	0.628143
AT5G39360.1	1.498	0.225075	0.372691	0.756767
AT4G01540.2	1.932	0.262736	0.369031	0.693397
AT4G01540.1	1.938	0.279378	0.368955	0.668029
AT2G02930.1	2.278	0.184154	0.384294	0.826806
AT5G55140.1	1.56	0.296962	0.370018	0.64523
AT4G27230.1	1.63	0.327003	0.364092	0.594658
AT4G27230.2	1.738	0.29491	0.369503	0.644214
AT5G66280.1	1.805	0.243108	0.36488	0.7233
AT4G34370.1	1.794	0.251909	0.36472	0.705554
AT1G64142.1	1.758	0.296464	0.363613	0.638698
AT4G34370.2	1.824	0.244963	0.36597	0.71759
AT1G51980.2	1.787	0.298176	0.360741	0.630143
AT3G05560.3	1.722	0.302559	0.373556	0.642144
AT5G18230.2	1.621	0.298887	0.366188	0.63761
AT5G18230.1	1.624	0.301841	0.367296	0.634941
AT1G55690.3	1.841	0.224016	0.377682	0.760741
AT1G55690.2	1.793	0.235665	0.379085	0.744746
AT5G46315.1	7	0.206531	1.14702	0.970116
AT5G52840.1	1.509	0.35512	0.359167	0.554874
AT5G53340.2	1.865	0.269347	0.367729	0.683769
AT4G39560.1	1.834	0.247937	0.387123	0.731649
AT4G13200.1	1.438	0.262172	0.363402	0.690361
AT5G13500.1	1.928	0.22237	0.379397	0.761928
AT1G26880.1	1.672	0.34399	0.36799	0.579206
AT5G13500.3	1.851	0.219389	0.370406	0.758695
AT5G13500.2	1.9	0.22035	0.376827	0.763152
AT3G56480.1	1.656	0.28681	0.355114	0.641078
AT1G78630.1	1.891	0.25267	0.380508	0.718593
AT1G65845.1	1.693	0.297881	0.364233	0.633665
AT5G21170.1	1.555	0.300806	0.357308	0.619328
AT5G53320.1	2.072	0.249778	0.373273	0.715097
AT4G00740.1	1.71	0.265049	0.366213	0.688123
AT4G30160.1	1.827	0.258313	0.366713	0.699485
AT2G44530.2	1.758	0.279598	0.368583	0.666866
AT2G44530.1	1.744	0.27988	0.367483	0.665382
AT5G40670.1	1.972	0.248203	0.366034	0.715346
AT4G33200.1	1.953	0.243508	0.377272	0.731255
AT4G33200.3	1.998	0.239692	0.379422	0.738696
AT4G33200.2	1.963	0.241184	0.377672	0.735241
AT1G05850.1	1.827	0.368823	0.356423	0.529992
AT3G47670.1	1.926	0.265339	0.380588	0.703087
AT5G53340.1	1.863	0.268506	0.365244	0.681352
AT2G20630.2	1.707	0.272165	0.365555	0.676889
AT5G28330.1	2.123	0.169874	0.365144	0.839149
AT2G20630.1	1.637	0.334979	0.359281	0.578438
AT2G24400.1	1.653	0.235663	0.375323	0.741996
AT2G21160.2	1.78	0.351886	0.377994	0.580289
AT2G25520.1	2.36	0.303977	0.384596	0.647718
AT1G32240.1	1.679	0.227137	0.374566	0.754574
AT5G10278.1	1.577	0.180708	0.385545	0.83526
AT3G05560.1	2.15	0.372951	0.369939	0.540106
AT5G18210.1	2.459	0.167828	0.384782	0.853579
AT5G04740.2	2.144	0.28107	0.382979	0.67687
AT5G04740.1	2.029	0.308902	0.373301	0.625582
AT3G06580.1	1.618	0.285279	0.366895	0.659725
AT1G72175.1	1.649	0.236464	0.375504	0.738731
AT1G21770.1	1.882	0.271213	0.382729	0.69347
AT1G31070.1	1.764	0.256618	0.367774	0.703351
AT1G31070.2	1.685	0.296257	0.362897	0.637016
AT1G05620.1	1.55	0.251099	0.37347	0.717191
AT5G61020.2	1.894	0.353882	0.367143	0.564668
AT4G33780.1	1.869	0.265489	0.382028	0.703309
AT3G57480.1	1.806	0.239303	0.383301	0.742263
AT1G77810.1	1.745	0.241299	0.37972	0.738969
AT3G11710.1	1.836	0.342273	0.368533	0.581344
AT1G77810.2	1.752	0.26119	0.382658	0.711115
AT5G07360.1	1.946	0.253667	0.385694	0.723731
AT5G07360.2	2.009	0.247704	0.387262	0.733472
AT3G50550.1	1.611	0.304871	0.363644	0.625455
AT3G16690.1	1.832	0.256694	0.392095	0.723922
AT3G11770.1	2.149	0.244683	0.398538	0.745888
AT1G64650.2	1.736	0.264875	0.37101	0.694314
AT1G31050.1	1.674	0.303589	0.371201	0.638552
AT3G03870.2	2.006	0.23946	0.375195	0.734835
AT3G03870.1	2.005	0.246855	0.381184	0.728908
AT5G66140.1	1.59	0.262854	0.358208	0.680431
AT2G17230.1	1.566	0.247856	0.35801	0.706202
AT1G22220.1	2.273	0.248491	0.385675	0.72878
AT3G53668.1	1.907	0.268269	0.369297	0.684432
AT4G21090.3	1.765	0.249095	0.375022	0.722155
AT4G21090.2	1.759	0.24817	0.374531	0.723364
AT4G21090.1	1.765	0.249963	0.375144	0.720949
AT4G27840.1	1.966	0.204519	0.37426	0.788812
AT2G28940.1	1.639	0.265856	0.379241	0.699324
AT2G28940.2	1.608	0.265633	0.378356	0.699226
AT3G53740.3	1.47	0.41145	0.349828	0.479655
AT5G64460.8	1.614	0.273909	0.358645	0.664604
AT5G44920.1	1.468	0.273917	0.370507	0.683941
AT5G35590.1	1.723	0.331848	0.364834	0.58834
AT4G11010.1	1.894	0.331944	0.359751	0.57849
AT3G54690.1	2.079	0.225446	0.374764	0.756828
AT1G29530.1	1.769	0.232477	0.381985	0.748264
AT5G18270.1	1.919	0.228359	0.369803	0.749519
AT5G48760.1	1.886	0.325894	0.378833	0.613825
AT3G51620.1	1.802	0.234676	0.375988	0.741837
AT5G48760.2	1.893	0.322871	0.378403	0.617205
AT4G31010.2	1.951	0.256007	0.381256	0.71475
AT4G31010.1	1.883	0.2817	0.382754	0.678194
AT2G44525.1	1.691	0.273569	0.378571	0.683668
AT1G79570.1	2.01	0.23735	0.378294	0.741171
AT3G53740.2	1.47	0.402363	0.352479	0.492754
AT3G21260.3	2.018	0.235309	0.395755	0.756105
AT5G47180.1	1.849	0.283772	0.373628	0.666796
AT5G47180.2	1.878	0.306281	0.374058	0.634691
AT3G51640.1	1.928	0.269342	0.372953	0.688533
AT3G13200.1	1.765	0.375535	0.353652	0.521044
AT5G50580.1	1.901	0.279522	0.384609	0.684467
AT5G50580.2	1.862	0.282545	0.381166	0.676979
AT4G08380.1	1.626	0.341463	0.372226	0.592438
AT5G38895.1	2.522	0.209493	0.377413	0.780873
AT3G61130.1	1.861	0.252032	0.363459	0.70318
AT5G20840.1	2.297	0.244779	0.375856	0.726785
AT3G59690.1	1.755	0.306441	0.364872	0.623524
AT1G30330.1	2.393	0.248688	0.385469	0.730207
AT3G50550.2	1.305	0.262433	0.357714	0.68239
AT5G13560.1	1.869	0.247789	0.365584	0.715539
AT1G51270.3	1.935	0.223313	0.377283	0.763807
AT5G05360.2	1.702	0.265947	0.378178	0.696858
AT3G23210.1	1.813	0.203662	0.380542	0.796034
AT5G05360.1	1.604	0.306806	0.371805	0.629533
AT5G10980.1	1.705	0.348892	0.359244	0.560644
AT4G28100.1	2.087	0.263491	0.38335	0.704284
AT2G23290.1	1.611	0.309155	0.360153	0.615109
AT1G14370.1	1.954	0.254067	0.39013	0.726709
AT5G03280.1	1.884	0.265952	0.378198	0.698831
AT1G22640.1	1.621	0.222006	0.370238	0.757696
AT5G42690.3	2.123	0.235985	0.383112	0.745521
AT5G42690.2	2.024	0.252658	0.385439	0.723062
AT5G42690.1	2.018	0.251074	0.384113	0.724121
AT3G44340.2	2.077	0.258146	0.379597	0.712136
AT4G03260.2	1.831	0.266403	0.371815	0.691485
AT5G06450.1	1.648	0.213751	0.36245	0.763926
AT4G08980.3	1.811	0.280479	0.379952	0.678231
AT4G30190.1	1.788	0.352153	0.354007	0.550547
AT4G30190.2	1.778	0.343682	0.35576	0.563176
AT2G20230.1	1.824	0.258196	0.365187	0.696799
AT1G06510.1	2.003	0.198183	0.377481	0.799972
AT3G13480.1	1.69	0.306043	0.365969	0.624371
AT2G32520.1	1.628	0.281499	0.364978	0.660382
AT1G64980.1	1.739	0.261605	0.3765	0.705458
AT2G36160.1	1.532	0.370231	0.348532	0.521968
AT5G19450.1	1.682	0.304202	0.359706	0.618074
AT1G55980.1	1.832	0.239127	0.382026	0.739238
AT2G38650.2	1.997	0.276897	0.373773	0.677217
AT5G46730.1	1.582	0.299273	0.35222	0.617544
AT5G46730.2	1.618	0.296588	0.358821	0.629794
AT5G40570.1	1.405	0.276867	0.363988	0.667516
AT1G80030.1	1.876	0.228047	0.378037	0.755636
AT5G25560.4	1.532	0.270449	0.368157	0.682525
AT1G80030.2	1.911	0.222733	0.380777	0.766303
AT5G25560.2	1.466	0.287391	0.366027	0.656205
AT3G54810.1	1.908	0.255944	0.369818	0.703809
AT3G54810.2	1.818	0.278105	0.36651	0.667123
AT5G25560.1	1.448	0.284763	0.363462	0.657034
AT3G22630.1	1.841	0.266099	0.362674	0.681105
AT2G36400.1	1.81	0.244546	0.381603	0.73345
AT4G02430.2	1.699	0.250719	0.365858	0.709327
AT2G28350.1	2.228	0.189024	0.399419	0.828314
AT4G02430.1	1.68	0.251267	0.366453	0.708927
AT5G09250.2	1.404	0.230287	0.362445	0.7411
AT5G09250.1	1.386	0.275378	0.366364	0.673805
AT1G18840.1	1.65	0.267234	0.369795	0.688731
AT1G20950.1	1.659	0.329627	0.370704	0.599658
AT1G18840.2	1.647	0.266889	0.369691	0.689294
AT1G78660.3	1.555	0.293451	0.363818	0.643961
AT1G78660.2	1.537	0.307305	0.363996	0.624568
AT1G78660.1	1.536	0.303173	0.361437	0.626822
AT1G56700.1	1.501	0.248578	0.355296	0.703069
AT1G56700.2	1.503	0.242734	0.352301	0.709026
AT1G56700.3	1.549	0.241278	0.356216	0.716058
AT2G36420.1	1.696	0.373187	0.357673	0.530398
AT3G22310.1	1.729	0.29589	0.362892	0.638235
AT3G07190.1	1.705	0.254398	0.382578	0.71663
[truncated: 15,284 more rows]

## Sheet: R4
R4 Root Salt Whole Transcript Derived Reactivity Statistics
transcript	Root_Salt_Max	Root_Salt_Average	Root_Salt_SD	Root_Salt_Gini
AT1G73350.3	1.689	0.246883	0.376515	0.724864
AT2G14880.1	1.696	0.211534	0.364494	0.768158
AT3G19760.1	1.725	0.332895	0.35857	0.581404
AT2G12280.1	2.119	0.183462	0.379823	0.826068
AT3G20960.1	2.047	0.236008	0.374439	0.739563
AT2G22190.1	1.703	0.237354	0.371662	0.735816
AT5G62000.3	1.75	0.30686	0.36696	0.625479
AT1G08650.2	1.485	0.252238	0.362068	0.703473
AT3G11130.1	1.952	0.307676	0.366216	0.625136
AT3G09860.1	1.5	0.306894	0.354349	0.608822
AT1G04440.1	1.563	0.288891	0.36834	0.653857
AT5G13090.1	2.115	0.225591	0.378485	0.758778
AT4G30810.1	1.583	0.28267	0.369201	0.666096
AT3G10680.1	1.58	0.313224	0.360252	0.612573
AT3G60530.1	1.888	0.282407	0.369251	0.662967
AT1G31730.1	2.288	0.295319	0.371181	0.646908
AT5G06630.1	1.614	0.348792	0.358232	0.562434
AT2G41600.3	1.77	0.222609	0.372289	0.760038
AT5G23830.2	1.599	0.26013	0.366172	0.697922
AT1G21160.1	1.991	0.257851	0.372852	0.702721
AT3G11500.1	1.607	0.334461	0.376893	0.602564
AT1G05170.2	2.269	0.225021	0.378347	0.758964
AT1G05170.1	2.291	0.218154	0.377847	0.769483
AT1G18490.1	2.008	0.196602	0.391295	0.813516
AT1G68920.1	1.977	0.241303	0.379098	0.73626
AT5G19550.1	1.612	0.312812	0.360756	0.608329
AT4G23740.1	1.83	0.217776	0.373277	0.76603
AT1G67750.1	1.837	0.279682	0.372759	0.67224
AT3G23900.1	1.812	0.26505	0.367935	0.687258
AT1G74660.1	1.495	0.266094	0.358469	0.676846
AT5G47540.1	1.907	0.268857	0.378543	0.691813
AT2G02370.2	1.827	0.189848	0.383894	0.820632
AT2G02370.1	1.854	0.195171	0.383843	0.811968
AT5G64840.1	1.699	0.28042	0.375293	0.673377
AT3G23990.1	1.947	0.347123	0.358029	0.561062
AT1G52720.1	1.712	0.248519	0.368917	0.71516
AT3G09720.1	2.58	0.234537	0.39773	0.757518
AT5G67570.1	1.65	0.273434	0.377995	0.686514
AT5G22070.1	1.564	0.228129	0.378505	0.758127
AT1G17080.1	1.683	0.285229	0.371554	0.664091
AT2G05710.1	2.013	0.323818	0.360024	0.594879
AT3G19740.1	1.738	0.258178	0.376436	0.707142
AT4G23760.1	1.382	0.223498	0.373634	0.762974
AT3G59940.1	2.072	0.262291	0.379572	0.70604
AT5G61412.1	1.57	0.283129	0.369055	0.661279
AT1G24490.2	1.537	0.236763	0.37278	0.7391
AT5G08120.1	1.848	0.275679	0.374404	0.679971
AT3G54110.1	1.706	0.299774	0.363592	0.631284
AT4G24760.1	1.524	0.281837	0.366622	0.663594
AT1G22360.1	1.807	0.312534	0.357853	0.608283
AT3G48520.1	1.975	0.210816	0.371286	0.776905
AT1G22360.2	1.808	0.298884	0.356634	0.625779
AT4G37190.1	1.806	0.228602	0.377126	0.754641
AT5G22050.2	2.469	0.246928	0.386615	0.732954
AT5G22050.1	2.444	0.229298	0.38463	0.758353
AT4G37190.2	1.779	0.233198	0.377351	0.747848
AT1G68920.3	1.946	0.241423	0.378614	0.73601
AT3G54130.1	2.264	0.237563	0.382803	0.740266
AT4G12840.2	1.573	0.256975	0.376459	0.70767
AT4G12840.1	1.568	0.257285	0.37656	0.707463
AT3G47965.1	1.965	0.270509	0.369594	0.668485
AT1G46480.1	1.856	0.251911	0.380711	0.724289
AT2G26190.1	1.858	0.268948	0.364533	0.680122
AT4G32330.3	1.753	0.323399	0.353803	0.586871
AT1G74920.2	1.689	0.318425	0.355074	0.594299
AT4G32330.1	1.75	0.311136	0.355447	0.606288
AT4G24275.1	1.343	0.301129	0.362647	0.633587
AT1G75800.1	1.531	0.318019	0.35612	0.596806
AT4G33880.1	2.019	0.216977	0.394314	0.788436
AT3G24520.1	1.856	0.226816	0.359958	0.74158
AT4G14230.1	1.726	0.245771	0.373126	0.723957
AT4G32070.1	1.952	0.305059	0.366477	0.62746
AT1G16530.1	1.402	0.26186	0.370022	0.69766
AT2G03680.1	1.744	0.333556	0.368164	0.587019
AT1G44780.1	1.844	0.319177	0.375099	0.618733
AT3G01180.1	1.938	0.242489	0.379372	0.732506
AT1G33060.1	1.867	0.206073	0.375098	0.786049
AT1G33060.2	2.024	0.205378	0.374626	0.786092
AT2G18050.1	1.484	0.29712	0.3752	0.65445
AT4G36740.1	1.501	0.298023	0.366926	0.639864
AT2G18050.2	1.467	0.282653	0.372026	0.671943
AT1G75750.1	1.752	0.319557	0.342033	0.571141
AT1G75750.2	1.831	0.302706	0.351399	0.606173
AT1G13530.1	2.056	0.299794	0.375609	0.643821
AT5G21990.1	1.599	0.271822	0.369468	0.68175
AT1G66660.2	2.171	0.226591	0.376315	0.756222
AT1G58170.1	1.702	0.25817	0.377594	0.711348
AT5G64810.1	1.678	0.246053	0.387394	0.73911
AT5G42150.1	1.589	0.266052	0.375743	0.696963
AT3G48210.1	1.738	0.242806	0.373993	0.729624
AT2G34200.1	1.827	0.266754	0.378562	0.697282
AT2G33120.2	1.663	0.280026	0.37585	0.676878
AT2G33120.3	1.804	0.25827	0.380331	0.712388
AT2G33120.1	1.599	0.288601	0.368161	0.657114
AT3G01420.1	1.95	0.294179	0.366993	0.642107
AT1G09730.2	2.099	0.238914	0.380761	0.741414
AT1G54210.1	1.581	0.194483	0.369331	0.802398
AT1G54210.2	1.645	0.194893	0.377145	0.808028
AT2G34610.1	1.851	0.255045	0.388672	0.727069
AT4G22240.1	1.618	0.240014	0.37472	0.736007
AT4G17560.1	1.824	0.222353	0.373558	0.759323
ATCG01240.1	1.424	0.252627	0.378785	0.718825
AT1G18150.2	1.93	0.26448	0.382115	0.703204
AT5G59000.1	1.834	0.174691	0.394623	0.849146
AT1G31935.1	1.595	0.220302	0.364035	0.759172
AT3G13610.1	2.26	0.299713	0.376077	0.645663
AT1G06850.2	1.851	0.210179	0.368121	0.775801
AT5G01650.1	1.718	0.213245	0.374272	0.776151
AT3G13120.2	1.83	0.234476	0.381566	0.74998
AT4G22250.1	1.453	0.295255	0.367761	0.647908
AT5G59890.1	1.579	0.287015	0.369438	0.658021
AT5G65960.1	1.408	0.305431	0.354143	0.613436
AT2G35840.3	1.647	0.228683	0.367733	0.747261
AT2G35840.2	1.545	0.270674	0.370008	0.684462
AT2G35840.1	1.534	0.278289	0.370612	0.673715
AT2G33810.1	1.567	0.197185	0.362044	0.794035
AT5G36290.1	2.487	0.279528	0.385491	0.68096
AT5G36290.2	2.477	0.278814	0.382219	0.678918
AT4G30260.1	1.781	0.243819	0.381502	0.734994
AT4G16180.2	1.632	0.275806	0.36437	0.668224
AT4G16180.1	1.659	0.213384	0.364238	0.765835
AT4G38740.1	1.628	0.393471	0.347796	0.493864
AT3G20410.1	1.883	0.322966	0.364501	0.598256
AT2G36000.1	1.659	0.214707	0.36757	0.767838
AT5G37510.1	1.626	0.312621	0.360362	0.610928
AT5G37510.2	1.639	0.310742	0.361048	0.614447
AT5G65940.1	1.71	0.302607	0.371904	0.640031
AT5G65940.2	1.713	0.30691	0.371649	0.632075
AT5G65940.3	1.698	0.291825	0.368631	0.650541
AT1G17680.1	2.213	0.240432	0.382321	0.740386
AT5G59410.1	1.957	0.248395	0.372212	0.717752
AT2G22860.1	1.398	0.268004	0.353706	0.670018
AT5G23830.1	1.694	0.293815	0.370481	0.650765
AT5G55960.1	2.359	0.228077	0.395203	0.768989
AT5G22875.1	1.618	0.219935	0.374765	0.769042
AT2G38470.1	2.091	0.294652	0.366895	0.639264
AT1G05150.1	1.755	0.270917	0.373137	0.684701
AT5G04440.1	1.927	0.248718	0.378089	0.723462
AT5G20180.1	1.872	0.20913	0.368013	0.776321
AT3G47060.1	1.668	0.261834	0.3767	0.703644
AT3G06470.1	2.137	0.200674	0.388898	0.807183
AT3G63500.1	2.183	0.289877	0.368655	0.652668
AT5G04420.2	2.084	0.282996	0.382313	0.672409
AT5G04420.3	2.15	0.263191	0.383782	0.703914
AT5G04420.1	2.107	0.27408	0.381453	0.684616
AT3G63500.2	2.167	0.295758	0.366946	0.641652
AT5G65790.1	1.773	0.284603	0.36032	0.651409
AT3G46000.1	1.582	0.283246	0.358413	0.651449
AT3G25585.4	1.978	0.243578	0.370791	0.725113
AT1G19310.1	2.066	0.227867	0.385987	0.760715
AT4G31990.3	1.504	0.293451	0.354966	0.632419
AT4G31990.2	1.486	0.317928	0.352728	0.594952
AT4G31990.1	1.49	0.308731	0.355037	0.611244
AT5G28770.3	1.926	0.259271	0.370018	0.700141
AT4G37160.1	1.613	0.288772	0.3635	0.651126
AT3G02065.2	1.764	0.218345	0.362721	0.756012
AT3G17120.1	1.608	0.240289	0.367277	0.726986
AT4G24830.1	1.628	0.293824	0.365841	0.644521
AT3G02065.1	1.871	0.209853	0.370555	0.776833
AT5G42390.1	2.018	0.259989	0.382268	0.709955
AT5G59890.2	1.548	0.280955	0.368243	0.668813
AT5G50120.1	1.731	0.221484	0.378787	0.767374
AT5G60390.2	1.953	0.39279	0.359293	0.506876
AT4G04470.1	1.629	0.271674	0.36645	0.679246
AT3G07790.1	1.708	0.276764	0.374105	0.677799
AT5G60390.1	1.966	0.407202	0.356857	0.487893
AT1G17455.2	2.105	0.206008	0.376929	0.788601
AT3G10260.3	1.959	0.221131	0.377306	0.764933
AT1G17455.1	2.074	0.227342	0.37958	0.756734
AT1G64460.1	1.941	0.23253	0.367389	0.738029
AT1G11260.1	2.194	0.327699	0.362615	0.590149
AT1G64750.2	1.583	0.31905	0.360667	0.600406
AT1G64750.3	1.791	0.235576	0.375576	0.743887
AT3G25530.1	1.592	0.320414	0.362816	0.60466
AT1G64750.1	1.558	0.340936	0.360422	0.570957
AT5G48180.1	1.442	0.339408	0.35425	0.570084
AT2G42190.1	1.891	0.293853	0.376075	0.654202
AT3G09440.1	1.65	0.337786	0.354803	0.567768
AT1G72370.1	1.895	0.414552	0.349427	0.469758
AT3G09440.2	1.647	0.344016	0.354146	0.558602
AT5G16680.1	1.81	0.284069	0.367474	0.660383
AT2G34300.2	1.716	0.334998	0.35048	0.56748
AT2G34300.1	1.726	0.335675	0.350442	0.566485
AT3G25150.1	1.59	0.305075	0.354026	0.612887
AT1G21580.1	2.161	0.215961	0.377875	0.772865
AT3G02790.1	1.646	0.304087	0.376017	0.642849
AT2G05440.7	1.362	0.372567	0.343115	0.512458
AT1G72850.1	1.854	0.225751	0.373424	0.757047
AT1G48650.1	2.427	0.234878	0.393387	0.754566
AT4G14920.1	1.874	0.242884	0.376009	0.731089
AT1G48650.2	2.165	0.224025	0.389467	0.767022
AT5G36710.1	1.839	0.255789	0.388944	0.720679
AT2G22450.1	1.577	0.252049	0.367514	0.709267
AT5G49510.2	1.966	0.248826	0.380907	0.727203
AT5G15600.1	2.269	0.252989	0.380169	0.716939
AT5G58100.1	1.878	0.273283	0.370656	0.677759
AT2G18960.1	1.706	0.345564	0.354404	0.558186
AT5G27520.1	1.787	0.26506	0.381542	0.703663
AT1G66430.1	1.808	0.2773	0.386012	0.687957
AT5G02500.2	1.862	0.356007	0.356715	0.54933
AT5G02500.1	1.9	0.365241	0.354697	0.534631
AT1G56460.2	1.662	0.28857	0.372512	0.661505
AT5G56020.1	1.964	0.202004	0.376464	0.795059
AT5G25100.1	1.904	0.290357	0.361866	0.64271
AT5G25100.2	1.945	0.278805	0.365737	0.664912
AT2G36060.1	1.765	0.265716	0.374811	0.693981
AT2G36060.2	1.829	0.271714	0.378882	0.688459
AT2G36060.3	1.866	0.265828	0.381317	0.700567
AT2G47360.1	2.008	0.215919	0.392524	0.78695
AT1G70810.1	2.193	0.271586	0.386893	0.697089
AT1G72170.1	1.369	0.278473	0.368786	0.67291
AT3G24530.1	1.777	0.24523	0.363687	0.715382
AT1G53180.1	1.803	0.256377	0.368711	0.699742
AT1G47250.1	1.54	0.29561	0.350075	0.623351
AT1G07930.2	1.569	0.364679	0.353811	0.534722
AT4G09030.1	2.081	0.293748	0.384597	0.660455
AT3G19420.1	1.663	0.279058	0.365637	0.666836
AT2G26170.2	1.858	0.227391	0.3788	0.756567
AT2G26170.1	1.838	0.245778	0.382197	0.731033
AT3G51370.2	1.799	0.269877	0.366708	0.681339
AT3G51370.1	1.784	0.287885	0.366985	0.654928
AT5G06270.1	2.137	0.184976	0.375224	0.820812
AT4G08850.1	2.359	0.252391	0.378371	0.71762
AT4G32010.1	2.153	0.237961	0.373021	0.733538
AT1G21630.2	1.917	0.274231	0.368171	0.676196
AT2G41300.1	1.746	0.270038	0.368343	0.681668
AT1G73030.1	1.895	0.333839	0.36934	0.593659
AT1G21630.1	1.895	0.285043	0.3689	0.661158
AT4G19060.1	1.964	0.264152	0.382484	0.70431
AT3G25840.2	2.113	0.318747	0.376441	0.616081
AT3G25840.1	2.08	0.325585	0.372907	0.603088
AT1G27030.1	2.022	0.32199	0.371985	0.611042
AT2G20950.3	1.824	0.268132	0.369992	0.686594
AT2G20950.2	1.813	0.267327	0.368283	0.685651
AT2G20950.1	1.758	0.278538	0.364679	0.665344
AT3G25150.2	1.621	0.275947	0.357864	0.661672
AT3G06030.1	1.818	0.233268	0.380249	0.748377
AT3G02950.1	1.553	0.320131	0.360553	0.599964
AT2G21060.1	1.703	0.387668	0.34705	0.497518
AT1G13700.1	1.991	0.23359	0.387971	0.753557
AT4G29130.1	1.852	0.255228	0.367251	0.703445
AT4G15760.2	2.18	0.220831	0.375043	0.763871
AT1G50550.1	1.735	0.177578	0.381155	0.837789
AT4G15760.1	2.158	0.239544	0.377952	0.736647
AT2G02820.2	1.714	0.262797	0.377773	0.702244
AT2G02820.1	1.616	0.287832	0.37812	0.665965
AT3G58270.1	1.741	0.25538	0.388186	0.721273
AT1G33700.1	1.926	0.23931	0.372526	0.73365
AT4G02270.1	2.396	0.264392	0.386144	0.706105
AT1G33700.2	1.922	0.240113	0.372113	0.731955
AT3G58270.2	1.734	0.259231	0.389227	0.716538
AT5G10490.2	2.007	0.220778	0.371579	0.760289
AT1G76160.1	1.588	0.302425	0.355931	0.620367
AT3G52090.2	1.902	0.248433	0.368131	0.716786
AT4G11360.1	1.914	0.276682	0.38904	0.694379
AT4G21190.1	1.722	0.234837	0.379125	0.745961
AT5G62900.1	1.711	0.287177	0.379328	0.670837
AT1G58030.1	2.042	0.251069	0.377034	0.71959
AT2G30840.1	1.944	0.253168	0.41181	0.745039
AT4G19990.1	1.836	0.240304	0.380935	0.738179
AT5G11990.1	1.556	0.266675	0.362281	0.680316
AT4G19990.2	1.827	0.24096	0.378774	0.734701
AT3G27100.1	1.416	0.266887	0.361036	0.681171
AT3G27100.2	1.496	0.225739	0.361598	0.747153
AT5G10930.1	1.933	0.235186	0.378108	0.740988
AT1G51450.1	2.085	0.248086	0.378254	0.721944
AT1G29470.1	1.55	0.363588	0.351575	0.536137
AT1G29470.2	1.529	0.370247	0.349013	0.525063
AT1G19880.1	1.733	0.310205	0.362271	0.617648
AT3G10480.3	2.047	0.221081	0.3764	0.764979
AT4G29870.1	1.462	0.2688	0.368099	0.684656
AT3G48680.1	1.725	0.301885	0.365031	0.631473
AT4G08110.1	2.263	0.210675	0.380531	0.782635
AT5G01390.4	1.85	0.210706	0.376159	0.781396
AT5G01390.3	1.862	0.200941	0.373952	0.794971
AT5G59180.1	1.888	0.234198	0.388056	0.754515
AT1G58684.1	1.607	0.379023	0.355868	0.521188
AT5G03905.1	1.807	0.22081	0.375142	0.762783
AT3G18230.1	1.944	0.272056	0.376543	0.686034
AT5G15610.1	1.79	0.286455	0.37164	0.65976
AT5G47100.1	1.773	0.233017	0.377732	0.75089
AT1G48320.1	1.692	0.215931	0.363971	0.764531
AT4G37130.1	1.969	0.228252	0.373039	0.748263
AT4G33565.1	1.845	0.224164	0.376144	0.760478
AT2G22970.1	1.64	0.255268	0.36322	0.69883
AT1G30900.1	2.009	0.292841	0.381774	0.661222
AT1G68880.1	1.588	0.247821	0.361638	0.709482
AT1G17210.1	1.743	0.27135	0.371775	0.682752
AT1G14070.1	1.972	0.201405	0.369243	0.789918
AT1G13170.1	2.032	0.255718	0.373354	0.708151
AT1G13170.2	2.079	0.242965	0.37445	0.729125
AT1G02220.1	1.709	0.272978	0.363882	0.673596
AT3G51430.1	1.805	0.237789	0.372584	0.736019
AT1G14010.1	1.935	0.34843	0.368945	0.569162
AT5G42780.1	1.636	0.252929	0.364525	0.703208
AT1G28580.2	1.89	0.250742	0.374619	0.716131
AT1G28580.1	1.809	0.281016	0.372251	0.667191
AT2G27140.1	1.647	0.282784	0.368885	0.664482
AT5G16110.1	1.849	0.249521	0.361251	0.702597
AT5G55990.1	1.93	0.254706	0.37777	0.712667
AT2G41250.1	1.838	0.296739	0.376364	0.649215
AT3G52220.1	1.504	0.324085	0.351335	0.584598
AT5G45100.2	2.036	0.242256	0.378816	0.735866
AT2G43610.1	1.75	0.376174	0.359658	0.52629
AT3G56120.1	1.919	0.244011	0.381821	0.733394
AT5G67560.1	1.386	0.25596	0.363768	0.701082
AT5G44020.1	1.612	0.342455	0.357983	0.567349
AT3G48150.1	2.132	0.247151	0.390405	0.733539
AT3G53560.1	1.738	0.219246	0.370387	0.761084
AT1G55450.1	1.9	0.279999	0.379159	0.677882
AT1G48330.1	1.718	0.216215	0.384426	0.782325
AT3G06360.1	1.543	0.202148	0.369253	0.791782
AT2G25680.1	1.866	0.329579	0.362372	0.591225
AT1G30330.2	1.991	0.237706	0.376124	0.738953
AT3G10330.1	1.801	0.259158	0.377972	0.707281
AT4G08500.1	1.965	0.242502	0.382877	0.73727
AT4G03260.2	1.697	0.25457	0.377958	0.716047
AT5G67320.1	1.643	0.318219	0.352542	0.593447
AT4G31180.1	2.045	0.287821	0.369467	0.65373
AT4G31180.2	2.098	0.281374	0.372254	0.66597
AT2G36650.1	1.852	0.31759	0.362817	0.607413
AT4G03200.2	1.927	0.231721	0.371532	0.745206
AT4G03200.1	1.893	0.259015	0.373342	0.704319
AT1G58983.1	1.607	0.379023	0.355868	0.521188
AT1G06910.1	1.72	0.260148	0.378866	0.708001
AT1G09580.1	1.602	0.262372	0.367547	0.693074
AT1G52060.1	1.669	0.351119	0.352681	0.545033
AT1G79480.1	2.239	0.183241	0.376829	0.824457
AT1G79480.2	2.24	0.183384	0.376436	0.823731
AT5G44240.2	2.096	0.238753	0.379779	0.740383
AT5G05790.1	1.537	0.26764	0.37558	0.692629
AT5G44240.1	2.109	0.229975	0.377797	0.752279
AT3G14610.1	1.895	0.284848	0.369659	0.658911
AT3G44110.1	1.767	0.353211	0.363829	0.562027
ATCG00250.1	2.842	0.142857	0.604482	0.947365
AT1G74260.1	2.179	0.268968	0.375165	0.689146
AT3G22590.1	1.69	0.302593	0.367456	0.635645
AT1G52500.1	2.33	0.236718	0.382322	0.743093
AT3G25717.1	1.658	0.293891	0.370196	0.650999
AT2G46030.1	1.625	0.263954	0.388184	0.712727
AT3G57080.1	1.933	0.217445	0.379503	0.773892
AT2G47110.1	1.791	0.383006	0.357178	0.517773
AT2G47110.2	1.838	0.370752	0.362714	0.539943
AT3G25190.1	1.769	0.338725	0.371577	0.586533
AT5G27150.1	1.833	0.254569	0.376438	0.712484
AT3G62100.1	1.661	0.239515	0.385488	0.742749
AT1G26240.1	1.619	0.357284	0.350952	0.541979
AT5G20520.1	1.615	0.261291	0.362234	0.688548
AT1G11910.1	1.626	0.350899	0.347795	0.539762
AT4G35230.1	1.837	0.326618	0.359364	0.589581
AT1G27970.2	2.124	0.221428	0.368866	0.76085
AT4G30020.1	1.928	0.254415	0.373681	0.709667
AT5G20500.1	1.668	0.31366	0.353189	0.593695
AT1G01780.1	1.424	0.272542	0.362007	0.673706
AT5G63370.4	1.942	0.275561	0.364247	0.668549
AT5G62050.1	1.843	0.254187	0.377872	0.715989
AT3G60130.1	1.558	0.282229	0.364771	0.661288
AT2G40750.1	1.83	0.213033	0.374646	0.777431
AT3G60130.3	1.642	0.264118	0.371867	0.696823
AT1G09830.1	2.199	0.217882	0.369942	0.763167
AT3G12120.2	1.996	0.334707	0.349433	0.559838
AT3G19640.1	1.873	0.306061	0.369637	0.626997
AT3G06480.1	2.02	0.247799	0.384881	0.730362
AT1G32460.1	2.106	0.258384	0.382641	0.707667
AT2G23070.1	1.935	0.266744	0.378032	0.69733
AT2G36130.1	1.865	0.317196	0.369289	0.610406
AT1G60680.1	1.768	0.334013	0.367834	0.59105
AT2G16930.2	1.696	0.304687	0.372046	0.637093
AT2G16930.3	1.727	0.279535	0.371289	0.672224
AT5G06570.2	2.192	0.252668	0.371493	0.711117
AT4G16141.1	1.608	0.316994	0.369334	0.615158
AT5G19930.2	1.929	0.228495	0.384355	0.756741
AT5G42770.1	1.7	0.296002	0.36344	0.638135
AT5G42770.2	1.769	0.26566	0.361339	0.679269
AT5G19930.1	1.943	0.222966	0.384	0.765298
AT2G16950.2	1.834	0.238533	0.374545	0.735706
AT2G16950.1	1.849	0.229956	0.372671	0.747372
AT5G10060.1	1.807	0.269592	0.372296	0.687546
AT3G29160.1	2.14	0.245798	0.377731	0.724702
AT3G29160.2	2.188	0.242535	0.378604	0.730551
AT3G29160.3	2.094	0.24662	0.376266	0.721979
AT1G51270.3	2.525	0.20006	0.393803	0.812014
AT1G64330.1	1.671	0.370711	0.35104	0.520865
AT5G61770.3	1.736	0.255807	0.36777	0.70285
AT5G61770.2	1.668	0.261291	0.362292	0.68867
AT5G61770.1	1.721	0.253385	0.366635	0.706256
AT1G48698.1	1.678	0.190852	0.361562	0.800907
AT1G11680.1	1.68	0.308575	0.365898	0.62228
AT3G01610.1	2.216	0.248349	0.385842	0.731047
AT3G22750.1	1.674	0.218369	0.370151	0.764732
AT3G45900.1	1.536	0.236165	0.36684	0.734962
AT2G33630.1	1.79	0.282224	0.363888	0.658736
AT1G76980.1	2.135	0.227591	0.385506	0.761718
AT5G05730.1	1.549	0.287052	0.368461	0.657988
AT4G32330.2	1.761	0.311449	0.356016	0.60616
AT5G05730.2	1.563	0.271075	0.366769	0.679393
AT1G74920.1	1.781	0.333243	0.355701	0.575207
AT1G29880.1	1.693	0.302982	0.366951	0.633899
AT5G08560.2	2.129	0.274279	0.367932	0.672711
AT1G54610.1	1.786	0.29009	0.367483	0.648417
AT1G54610.2	1.907	0.287969	0.373482	0.657146
AT1G54610.3	1.864	0.285166	0.369617	0.658201
AT5G23630.1	1.946	0.256494	0.375215	0.708487
AT1G25560.1	1.994	0.247621	0.382082	0.728246
AT1G61750.1	1.889	0.224145	0.382355	0.766011
AT5G13390.1	1.988	0.212073	0.372635	0.77533
AT1G65840.1	1.876	0.249212	0.383505	0.729663
AT2G25560.1	1.966	0.205311	0.381923	0.791879
AT1G19740.1	1.744	0.221378	0.37466	0.762152
AT2G38000.1	2.28	0.270616	0.376427	0.688632
AT5G15320.1	1.7	0.31011	0.379125	0.635198
AT4G27040.2	1.952	0.242605	0.373954	0.729912
AT5G23405.2	1.675	0.290635	0.375419	0.661982
AT3G16140.1	2.073	0.19797	0.388475	0.810561
AT1G51610.1	2	0.190466	0.377536	0.814532
AT1G08370.1	1.995	0.276499	0.371556	0.675782
AT2G22490.1	1.837	0.266072	0.370524	0.690904
AT2G22490.2	1.849	0.263499	0.371302	0.695573
AT3G16720.1	1.643	0.198551	0.376415	0.801521
AT5G47435.1	1.525	0.234636	0.368236	0.738514
AT1G07135.1	2.07	0.327493	0.389661	0.62201
AT5G60640.1	1.707	0.33515	0.362486	0.581284
AT5G60640.2	1.738	0.319027	0.365072	0.606878
AT5G60640.3	1.681	0.330592	0.367379	0.594273
AT1G25211.1	1.633	0.292971	0.360461	0.639579
AT3G52420.1	1.459	0.294896	0.356652	0.63112
AT3G53500.2	1.763	0.299687	0.364535	0.631696
AT3G53500.1	1.707	0.288588	0.369795	0.653297
AT5G60620.1	1.841	0.280166	0.36831	0.667733
AT2G05540.1	1.893	0.204766	0.370011	0.784383
AT1G45249.1	1.605	0.289984	0.363655	0.64921
AT1G45249.2	1.615	0.274669	0.365514	0.674704
AT1G45249.3	1.651	0.27705	0.361262	0.665202
AT2G01100.1	1.78	0.361836	0.35291	0.535179
AT2G01100.3	1.865	0.340907	0.363973	0.576552
AT2G01100.2	1.778	0.377158	0.354533	0.517712
AT5G27860.1	1.774	0.269196	0.363143	0.678265
AT3G19050.1	2.212	0.258006	0.378779	0.707909
AT3G07600.1	1.701	0.254347	0.377541	0.717298
AT5G27860.2	1.848	0.253941	0.362195	0.699904
AT4G21600.1	1.84	0.30819	0.36852	0.626209
AT5G45410.2	1.773	0.274115	0.369095	0.677611
AT3G21610.2	2.048	0.211916	0.384628	0.784549
AT3G14350.2	1.763	0.255915	0.370207	0.707099
AT3G14350.1	1.717	0.276427	0.368613	0.673967
AT3G21610.1	2.005	0.214419	0.383021	0.779669
AT1G33590.1	1.826	0.258919	0.375286	0.706999
AT5G39740.2	1.663	0.373534	0.359441	0.53193
AT5G54860.1	1.946	0.204273	0.377345	0.791095
AT2G21260.1	2.359	0.147491	0.395671	0.88851
AT3G07430.1	1.984	0.252703	0.380177	0.718252
AT1G70090.1	2.453	0.19862	0.400989	0.814739
AT1G70090.2	2.555	0.179272	0.403656	0.845751
AT1G64572.1	1.75	0.282488	0.387502	0.6832
AT3G26910.2	1.719	0.218128	0.371182	0.764835
AT1G70430.1	2.483	0.120537	0.402581	0.922581
AT4G36180.1	1.752	0.247295	0.374567	0.72445
AT4G32605.1	1.816	0.291786	0.379048	0.660355
AT2G41500.1	1.957	0.272468	0.375455	0.686781
AT2G01830.3	1.732	0.271906	0.364794	0.675857
AT2G01830.2	1.717	0.280712	0.364898	0.662674
AT3G21430.2	1.756	0.226448	0.375246	0.75518
AT3G48820.1	1.783	0.266864	0.375542	0.692735
AT3G48820.2	1.774	0.267744	0.376068	0.692277
AT1G71850.1	1.812	0.240054	0.372443	0.731335
AT5G60950.1	1.859	0.242026	0.37683	0.733023
AT3G19520.1	1.699	0.280432	0.37176	0.667493
AT3G45800.1	7	0.195357	0.914949	0.960792
AT2G46535.1	1.603	0.329839	0.369338	0.601119
AT4G26670.1	1.845	0.195699	0.371929	0.801905
AT1G36050.2	1.866	0.311138	0.375601	0.629168
AT3G55060.1	1.939	0.258607	0.37063	0.699577
AT1G08340.1	2.044	0.2353	0.374224	0.740619
AT4G16100.1	1.958	0.227122	0.380897	0.756565
AT3G02870.1	1.561	0.210324	0.35736	0.766453
AT3G02870.3	1.581	0.200309	0.357486	0.783338
AT3G02870.2	1.511	0.195348	0.362053	0.794932
AT1G18250.1	1.945	0.291413	0.390933	0.671394
AT1G18250.2	1.973	0.270411	0.386575	0.696975
AT3G66652.1	2.29	0.214548	0.37724	0.771989
AT3G66652.2	2.29	0.213771	0.376928	0.772994
AT4G21540.1	1.851	0.319928	0.376853	0.62224
AT4G21540.3	1.862	0.319208	0.379078	0.625854
AT5G20000.1	1.712	0.308558	0.364815	0.621421
AT5G54310.1	1.831	0.308305	0.36446	0.618592
AT4G18060.1	1.95	0.267914	0.380795	0.697315
AT3G02850.1	1.881	0.290843	0.366905	0.648356
AT3G06190.2	1.744	0.268271	0.384029	0.700484
AT1G06760.1	1.468	0.351931	0.348577	0.544354
AT1G01070.1	1.657	0.284853	0.367825	0.66101
AT4G29480.1	2.326	0.360223	0.374776	0.562279
AT5G37830.1	1.778	0.277916	0.369166	0.670648
AT3G49601.1	1.775	0.385109	0.347104	0.499617
AT1G28340.1	1.914	0.255126	0.382517	0.717808
AT5G44800.1	2.008	0.237591	0.378002	0.739985
AT1G26250.1	1.408	0.396598	0.344599	0.489739
AT1G29300.1	1.942	0.231781	0.382554	0.751953
AT2G01021.1	1.138	0.220094	0.355233	0.751069
AT5G57565.3	1.826	0.198082	0.389452	0.81078
AT3G28210.1	1.785	0.233044	0.379527	0.750635
AT1G20900.1	1.893	0.313892	0.372381	0.620486
AT4G38260.1	2.524	0.238835	0.378754	0.737756
AT2G29580.1	2.012	0.215661	0.373415	0.769091
AT3G16810.1	1.663	0.282014	0.370609	0.668825
AT2G46220.1	1.627	0.280791	0.372034	0.671475
AT5G14120.1	1.851	0.295584	0.358502	0.631981
AT5G24630.5	1.894	0.250023	0.383042	0.726548
AT5G24630.4	1.955	0.252709	0.38141	0.721263
AT5G04480.2	1.897	0.255424	0.376199	0.712236
AT5G24630.6	1.973	0.242343	0.380051	0.735465
AT5G52470.2	1.491	0.35989	0.366745	0.560397
AT5G24630.3	1.952	0.249995	0.380066	0.724003
AT5G24630.2	1.724	0.232224	0.376674	0.750152
AT4G15560.1	2.086	0.272587	0.37143	0.680213
AT5G12330.1	1.793	0.204282	0.371577	0.79007
AT1G12410.1	1.632	0.284324	0.35839	0.647288
AT5G12330.3	1.756	0.189599	0.366997	0.809334
AT5G12330.2	1.812	0.201242	0.370856	0.793988
AT3G52390.1	1.435	0.262762	0.368541	0.694055
AT5G12330.4	1.682	0.209743	0.370863	0.780638
AT1G09160.2	2.688	0.215903	0.377594	0.771785
AT3G52390.2	1.451	0.257476	0.370509	0.704272
AT5G57350.2	2.021	0.223668	0.377068	0.760325
AT3G58040.1	1.616	0.27188	0.368717	0.68084
AT4G35750.1	1.644	0.326149	0.358117	0.590115
AT3G59890.2	2.224	0.22857	0.381877	0.757899
AT3G59890.1	2.215	0.238976	0.385524	0.745248
AT2G45910.1	2.355	0.254276	0.374996	0.712527
AT1G20110.1	1.759	0.278378	0.366782	0.66748
AT1G36640.1	2.258	0.257596	0.422664	0.746415
AT2G39000.3	2.155	0.199673	0.385837	0.803247
AT1G09590.1	1.492	0.362354	0.354206	0.542816
AT2G39000.1	1.708	0.205614	0.386551	0.795785
AT1G18030.2	2.259	0.224333	0.381396	0.762635
AT4G30950.1	2.093	0.249041	0.382556	0.727501
AT3G22142.1	1.928	0.250069	0.362778	0.706487
AT5G22770.2	1.912	0.276977	0.369551	0.671658
AT4G38040.1	1.872	0.215694	0.374167	0.771882
AT2G26500.2	1.895	0.166271	0.384922	0.856064
AT2G26500.3	1.974	0.200602	0.402637	0.817687
AT3G04880.1	1.511	0.310478	0.368004	0.623236
AT4G35080.1	1.78	0.248043	0.376185	0.72403
AT1G05090.1	1.757	0.230901	0.376764	0.750305
AT4G35080.3	1.824	0.225688	0.374576	0.757606
AT4G35080.2	1.87	0.231414	0.378929	0.75185
AT1G80460.2	1.82	0.316461	0.360309	0.606312
AT1G20770.1	1.572	0.301014	0.369059	0.638191
AT5G61020.1	1.683	0.347481	0.357627	0.560949
AT1G80460.1	1.804	0.341983	0.35562	0.566416
AT1G02900.1	1.587	0.266251	0.353948	0.67109
AT5G56795.1	1.381	0.268045	0.360485	0.676876
AT5G04870.1	1.707	0.303902	0.362249	0.624906
AT5G46430.2	1.325	0.356327	0.34968	0.541668
AT5G46430.1	1.319	0.352141	0.346952	0.542364
AT1G56240.1	1.633	0.234927	0.368646	0.737882
AT2G22170.1	1.668	0.358315	0.349096	0.535051
AT4G19120.1	1.734	0.281808	0.37038	0.666912
AT4G19120.2	1.733	0.283605	0.371015	0.664754
AT1G04635.1	2.169	0.226755	0.387056	0.75965
AT3G06670.2	1.822	0.255118	0.368911	0.705752
AT3G06670.1	1.824	0.273666	0.369823	0.677771
AT1G43670.1	1.718	0.272011	0.37917	0.689911
AT4G09650.1	2.15	0.203012	0.388864	0.804561
AT2G31600.1	1.771	0.197069	0.371654	0.799086
AT2G31600.2	1.77	0.19722	0.372298	0.799447
AT2G30320.1	1.954	0.245569	0.383462	0.733323
AT3G17712.3	2.479	0.232545	0.390144	0.755978
AT2G30920.1	2.111	0.215755	0.384984	0.776863
AT1G20960.1	1.846	0.315335	0.364858	0.612179
AT1G20960.2	1.847	0.315094	0.36509	0.612813
AT1G30460.1	2.178	0.242569	0.37904	0.735031
AT3G50670.1	1.639	0.328003	0.366399	0.596209
AT3G50670.2	1.783	0.285669	0.374153	0.665061
AT5G58210.1	1.995	0.211671	0.379008	0.779933
AT1G49860.1	2.043	0.355959	0.36659	0.558247
AT4G01330.1	1.603	0.308324	0.36202	0.62013
AT4G01330.2	1.625	0.292581	0.363727	0.645083
AT4G36420.1	1.633	0.341627	0.376652	0.591788
AT5G09220.1	1.837	0.285605	0.356062	0.641732
AT3G05410.2	1.999	0.191148	0.383875	0.81777
AT3G54050.1	2.225	0.172717	0.392361	0.850622
AT3G54050.2	2.175	0.180592	0.394957	0.840962
AT5G44910.1	1.758	0.270339	0.390249	0.706038
AT2G14460.1	1.562	0.287683	0.374372	0.665392
AT3G19990.1	2.038	0.311225	0.370076	0.62243
AT2G33570.1	1.886	0.224813	0.374608	0.758785
AT1G60995.1	1.604	0.258753	0.370206	0.701477
AT2G27100.1	1.688	0.287691	0.365117	0.651765
AT1G80840.1	1.728	0.268028	0.380916	0.696916
AT2G29500.1	1.574	0.23526	0.364002	0.733649
AT5G05450.1	2.032	0.27797	0.374392	0.67364
AT3G20860.1	1.984	0.255249	0.375226	0.711228
AT2G20760.1	1.711	0.351928	0.364288	0.563997
AT5G65430.1	1.535	0.308899	0.36397	0.621564
AT5G65430.2	1.505	0.299863	0.362617	0.632453
AT5G65430.3	1.539	0.256714	0.364506	0.701146
AT3G17780.1	1.808	0.337362	0.3621	0.575904
AT3G10500.1	1.935	0.254444	0.385803	0.722098
AT5G54440.1	1.702	0.250369	0.376435	0.71908
AT2G28430.1	1.604	0.230208	0.367499	0.742137
AT4G14570.1	1.95	0.255332	0.386888	0.719501
AT3G02860.2	1.659	0.28481	0.353626	0.643649
AT3G22970.2	2.475	0.255796	0.389913	0.722255
AT1G48920.1	1.788	0.404454	0.349526	0.484296
AT2G28890.1	2.002	0.293989	0.379038	0.657808
AT1G08580.1	1.31	0.34237	0.356109	0.569711
AT3G08610.1	1.626	0.361212	0.353151	0.535477
AT1G09150.1	1.802	0.290446	0.374858	0.657839
AT3G06700.1	1.562	0.399536	0.358288	0.501128
AT2G01970.1	1.844	0.289219	0.37267	0.658745
AT3G19650.1	1.768	0.318927	0.361093	0.600463
AT5G65000.1	2.196	0.222866	0.387201	0.769465
AT5G58510.1	1.975	0.232811	0.378046	0.747739
AT5G65000.2	2.24	0.20531	0.382633	0.793088
AT4G21150.2	1.988	0.255098	0.372495	0.709805
AT4G21150.3	1.966	0.258422	0.371672	0.703935
AT4G21150.1	1.967	0.261238	0.371182	0.69878
AT5G28080.2	1.446	0.291485	0.356589	0.636698
AT5G65020.2	2.118	0.386937	0.365511	0.518363
AT5G65020.1	2.041	0.372239	0.360505	0.529398
AT1G23290.1	1.379	0.368149	0.361521	0.545464
AT5G47500.1	2.01	0.226809	0.377482	0.754031
AT3G25290.2	2.192	0.301778	0.379239	0.643486
AT3G16630.1	1.914	0.275886	0.368435	0.673235
AT3G25290.1	2.227	0.299464	0.382919	0.65101
AT1G13870.1	1.575	0.243004	0.363101	0.717592
AT3G05900.1	1.928	0.367865	0.35709	0.529075
AT3G23660.1	1.737	0.24125	0.385346	0.7418
AT2G26560.1	2.07	0.222996	0.395374	0.77874
AT2G39080.1	1.658	0.260058	0.379767	0.708778
AT3G23660.2	1.754	0.224639	0.378082	0.760662
AT4G39838.1	1.6	0.27989	0.380008	0.682177
AT4G02120.1	1.734	0.255468	0.377256	0.713872
AT4G31420.1	1.735	0.293129	0.374737	0.656413
AT2G38870.1	2.095	0.22095	0.403053	0.78563
AT5G38480.2	1.427	0.362506	0.368434	0.559188
AT5G38480.1	1.423	0.38375	0.363458	0.527877
AT1G17470.1	1.624	0.309712	0.365788	0.624339
AT5G49470.3	2.191	0.250735	0.384466	0.725646
AT1G60610.2	2.102	0.244992	0.381264	0.731501
AT1G17470.2	1.636	0.305007	0.367528	0.633059
AT1G09130.3	1.747	0.260285	0.371116	0.700444
AT1G09130.2	1.72	0.263518	0.370247	0.694642
AT1G09130.1	1.715	0.271753	0.369699	0.681438
AT1G55150.1	1.936	0.262222	0.380382	0.704189
AT1G07780.4	2.025	0.234029	0.384726	0.751027
AT1G07780.5	1.9	0.249237	0.382713	0.726222
AT1G07780.2	1.817	0.261388	0.378756	0.704068
AT1G07780.3	1.951	0.240175	0.383752	0.74107
AT1G07780.1	1.802	0.262939	0.375668	0.698454
AT5G38460.1	1.921	0.208475	0.372712	0.780538
AT5G45340.2	2.044	0.224225	0.375298	0.758389
AT5G38460.2	1.943	0.204796	0.373245	0.787107
AT5G16770.1	1.725	0.227794	0.37682	0.753242
AT4G25630.1	1.378	0.33622	0.353232	0.571913
AT4G16360.3	2.025	0.23419	0.377828	0.743709
AT4G16360.2	1.842	0.244271	0.380478	0.730024
AT4G16360.1	1.796	0.247966	0.378982	0.72363
AT2G29970.1	1.895	0.230631	0.376511	0.749565
AT1G79630.3	1.846	0.241139	0.377057	0.734883
AT5G16750.1	1.911	0.287445	0.378575	0.665437
AT4G26970.1	1.832	0.311513	0.359026	0.609871
AT3G22320.1	1.738	0.326679	0.363934	0.598124
AT1G68160.1	2.294	0.20664	0.382292	0.790777
AT3G09490.1	1.775	0.271499	0.374727	0.688989
ATCG00920.1	2.014	0.252212	0.371935	0.71221
AT5G66210.4	1.867	0.280575	0.379685	0.676645
AT5G66210.1	1.806	0.286274	0.37531	0.664315
AT4G13430.1	1.788	0.363992	0.362016	0.5447
AT5G66210.3	1.844	0.276247	0.388191	0.692575
AT4G14550.1	1.914	0.221046	0.372349	0.761531
AT5G54130.4	1.972	0.205571	0.376736	0.791341
AT3G17170.1	1.678	0.279481	0.37068	0.670694
AT1G06960.1	1.696	0.255087	0.37476	0.709206
AT5G59613.2	1.683	0.282479	0.361767	0.656801
AT1G06960.3	1.703	0.244776	0.374541	0.72547
AT1G06960.2	1.71	0.254643	0.375395	0.71049
AT3G24515.1	1.724	0.24538	0.378039	0.728109
AT1G25422.1	2.199	0.181991	0.374952	0.826223
AT4G26080.1	1.953	0.254046	0.381725	0.719849
AT3G52150.2	2.116	0.219764	0.379694	0.766872
AT3G52150.1	2.185	0.219678	0.385338	0.771936
AT1G14340.1	2.066	0.238104	0.382476	0.74158
AT4G15820.1	1.716	0.297765	0.367026	0.638646
AT3G52890.1	2.452	0.209741	0.377728	0.781918
AT5G09590.1	1.742	0.296828	0.361993	0.63498
AT4G13770.1	1.555	0.313308	0.357037	0.608564
AT1G62422.1	2.211	0.223729	0.412972	0.788594
AT3G12570.1	1.627	0.247373	0.373455	0.723213
AT3G12570.3	1.639	0.243955	0.372693	0.72758
AT3G12570.2	1.663	0.252117	0.376305	0.718351
AT3G12570.4	1.669	0.239756	0.3743	0.735363
AT5G55070.1	1.809	0.260422	0.368753	0.696233
AT4G02520.1	1.746	0.334344	0.365737	0.585553
AT3G52140.4	1.972	0.29595	0.366292	0.640843
AT2G40830.3	1.904	0.201416	0.369639	0.790206
AT2G40830.1	1.819	0.207248	0.364973	0.777482
AT5G29000.1	1.821	0.244664	0.370562	0.722824
AT3G52140.1	2.01	0.302773	0.364846	0.628793
AT3G52140.2	1.956	0.300673	0.365771	0.633744
AT5G29000.2	1.845	0.238456	0.370877	0.732723
AT5G39840.1	1.96	0.211309	0.383347	0.784435
AT2G36000.2	1.633	0.211175	0.365997	0.772873
AT5G23395.1	2.311	0.253516	0.391168	0.726316
AT5G13490.2	1.769	0.233447	0.368346	0.737014
AT5G13490.1	1.731	0.242013	0.370058	0.725123
AT3G49420.1	1.836	0.233784	0.375893	0.745875
ATMG01390.1	2.987	0.295368	0.396294	0.650226
AT5G53120.4	1.795	0.257356	0.370043	0.702221
AT1G09390.1	1.641	0.245864	0.385345	0.734468
AT3G25710.1	1.423	0.254121	0.358768	0.699409
AT3G16850.1	2.068	0.275696	0.379162	0.684009
AT4G38090.4	1.843	0.208151	0.378875	0.786324
AT4G38090.1	1.708	0.217758	0.369485	0.762396
AT1G80810.2	2.031	0.265575	0.376357	0.695118
AT4G38090.3	1.743	0.206047	0.369862	0.782352
AT4G38090.2	1.801	0.208789	0.382653	0.788364
AT3G22520.1	1.819	0.260823	0.364254	0.691539
AT4G00026.1	1.696	0.304436	0.37577	0.641932
AT5G50640.1	1.931	0.223812	0.382109	0.762874
AT1G55330.1	1.514	0.322884	0.364666	0.604138
AT1G48790.1	1.75	0.261946	0.377542	0.703454
AT1G35460.1	1.672	0.25289	0.370717	0.711446
AT5G52280.1	1.794	0.33875	0.357166	0.568807
AT1G73820.1	1.868	0.281525	0.370665	0.666395
AT5G46410.2	2.819	0.210466	0.383411	0.783986
AT1G75220.1	1.861	0.258844	0.37978	0.709426
AT1G04520.1	1.82	0.265008	0.384047	0.705207
AT3G48560.1	1.949	0.321524	0.365096	0.602701
AT5G02480.1	1.672	0.296817	0.357433	0.628532
AT1G11430.1	1.737	0.250895	0.361945	0.703698
AT4G01100.2	1.907	0.317354	0.368508	0.612473
AT4G01100.1	1.932	0.332374	0.366673	0.590101
AT3G62220.1	1.834	0.22339	0.373833	0.75855
AT2G47640.4	1.767	0.314955	0.372297	0.621407
AT4G17486.1	1.536	0.24933	0.371681	0.718574
AT1G07810.1	1.723	0.296563	0.367756	0.642159
AT1G80500.1	1.446	0.268471	0.353281	0.66958
AT2G47640.1	1.732	0.308512	0.36968	0.628416
AT2G47640.2	1.724	0.310693	0.37178	0.627229
AT2G47640.3	1.774	0.313416	0.377825	0.630525
AT2G10410.1	2.164	0.307713	0.383802	0.641385
AT1G68590.1	2.641	0.217277	0.422371	0.802662
AT2G18160.1	1.482	0.303906	0.356737	0.62026
AT1G32130.1	1.74	0.327249	0.355193	0.584828
AT2G47620.1	1.945	0.255548	0.36894	0.703533
AT2G24140.1	1.882	0.227148	0.377465	0.75681
AT4G01110.1	1.58	0.223521	0.364634	0.754005
AT1G68725.1	1.959	0.2994	0.384665	0.648913
AT1G73230.1	1.556	0.340755	0.35699	0.56933
AT1G66410.2	1.886	0.308642	0.36876	0.624714
AT1G66410.1	1.675	0.390528	0.354132	0.503437
AT1G04430.2	1.567	0.28829	0.359369	0.64549
AT4G12040.2	1.583	0.216049	0.368022	0.76787
AT2G01735.1	1.6	0.244533	0.380962	0.735297
AT4G12040.1	1.455	0.2688	0.362154	0.678589
AT4G27280.1	1.824	0.303089	0.372928	0.636897
AT1G32130.2	1.803	0.306892	0.35951	0.618498
AT1G76800.1	1.521	0.265084	0.359531	0.682789
AT1G69230.1	1.808	0.276889	0.37236	0.678041
AT3G12145.1	2.087	0.209191	0.378155	0.783209
AT1G57590.1	1.856	0.222559	0.378741	0.765059
AT3G11170.1	1.989	0.223588	0.378401	0.759675
AT1G26760.1	1.77	0.277935	0.380249	0.681963
AT1G76820.1	1.995	0.241947	0.383203	0.737061
AT3G58640.2	1.886	0.230639	0.377413	0.752656
AT5G53460.2	1.691	0.334393	0.357928	0.57947
AT3G54400.1	1.581	0.279167	0.361769	0.663103
AT1G33680.1	1.893	0.289438	0.373966	0.654718
AT4G22140.1	1.569	0.251128	0.36951	0.713184
AT4G22140.2	1.501	0.28694	0.369284	0.660113
AT2G33730.1	1.808	0.320804	0.360361	0.599163
AT4G16670.1	1.858	0.220171	0.375335	0.765438
AT2G45050.1	1.667	0.278488	0.362828	0.664645
AT2G04160.1	2.133	0.22449	0.379011	0.75861
AT5G06570.1	2.141	0.277823	0.375001	0.677441
AT4G21810.1	1.589	0.258845	0.365849	0.695185
AT5G11260.1	1.772	0.260077	0.374453	0.705645
AT4G05420.1	1.963	0.2661	0.376204	0.694944
AT4G05420.2	1.949	0.264708	0.375746	0.696971
AT3G01540.3	1.976	0.318438	0.360837	0.599798
AT5G19740.1	1.784	0.291266	0.374116	0.657912
AT2G41480.1	1.486	0.285357	0.386889	0.677739
AT3G07950.1	1.742	0.25827	0.369952	0.701556
AT3G55260.1	1.822	0.255694	0.377213	0.712154
AT1G06475.1	1.409	0.234263	0.370275	0.740923
AT5G56950.1	1.668	0.319152	0.358534	0.60182
AT3G24120.2	1.574	0.271807	0.376187	0.689147
AT3G24120.1	1.539	0.289877	0.369422	0.656356
AT1G50490.1	1.483	0.295541	0.361487	0.638902
AT1G65470.2	1.96	0.250327	0.387059	0.728021
AT3G31161.1	1.201	0.446214	0.283557	0.332179
AT3G23600.1	1.649	0.367522	0.358809	0.533975
AT1G54050.1	1.503	0.29298	0.37513	0.658148
AT5G51100.1	1.901	0.238128	0.382119	0.743736
AT2G38810.3	1.555	0.227413	0.3648	0.7474
AT2G38810.2	1.497	0.246186	0.363899	0.716566
AT2G38810.1	1.557	0.225202	0.365391	0.751667
AT5G10400.1	1.847	0.352162	0.360632	0.554417
AT4G22320.1	1.477	0.306279	0.354158	0.612746
AT4G22320.2	1.514	0.29567	0.359122	0.634871
AT1G65280.1	1.882	0.324091	0.359213	0.592367
AT1G13880.1	2.35	0.262932	0.378617	0.700764
AT3G26510.4	1.833	0.261753	0.375141	0.702756
AT3G26510.5	2.021	0.199931	0.36935	0.794033
AT4G15130.1	1.786	0.269926	0.371783	0.685446
AT3G47370.1	1.527	0.346137	0.363827	0.572363
AT3G26510.1	1.941	0.243237	0.378358	0.733891
AT3G26510.2	1.838	0.264556	0.374665	0.697803
AT3G26510.3	1.973	0.225846	0.373732	0.757195
AT1G12740.1	1.727	0.207176	0.372215	0.783083
AT1G12740.2	1.737	0.197472	0.368304	0.795472
AT2G30260.1	1.617	0.291389	0.370839	0.65391
AT1G12880.1	1.896	0.194788	0.367239	0.800175
AT5G20180.2	1.945	0.198705	0.371978	0.797325
AT4G32570.1	1.855	0.224532	0.377084	0.757915
AT1G19870.1	1.814	0.312382	0.363755	0.616591
AT5G65620.1	1.689	0.288636	0.363739	0.65027
AT1G72250.1	2.232	0.241247	0.375495	0.732862
AT1G72250.2	2.162	0.250557	0.372962	0.71639
AT1G55810.1	1.799	0.282453	0.383653	0.67956
AT3G16180.1	1.835	0.212312	0.370639	0.77371
AT1G55810.3	1.816	0.276303	0.383753	0.688702
AT2G30200.1	1.62	0.287334	0.366754	0.654769
AT1G63120.1	2.248	0.241821	0.403085	0.753074
AT4G34030.1	1.503	0.299268	0.359503	0.630074
AT4G22930.1	1.882	0.266162	0.373487	0.692694
AT3G47910.2	1.798	0.273163	0.373491	0.682731
AT1G59970.1	1.71	0.213904	0.368245	0.769555
AT1G77840.1	1.641	0.302552	0.361635	0.626321
AT3G60380.1	2.205	0.240541	0.383398	0.737804
AT5G16070.1	1.902	0.299271	0.364907	0.635983
AT4G33650.2	2.27	0.230493	0.381037	0.752849
AT4G33650.1	2.249	0.232937	0.382201	0.750753
AT1G27350.1	1.769	0.28135	0.374671	0.668879
AT5G64360.4	1.776	0.25113	0.377066	0.719199
AT5G64360.3	1.721	0.258033	0.373536	0.705339
AT5G64360.2	1.872	0.243717	0.382049	0.734437
AT5G64360.1	1.996	0.238735	0.381914	0.740663
AT2G30950.1	1.791	0.232241	0.375406	0.747806
AT1G18700.2	2.082	0.219726	0.384887	0.77422
AT1G18700.3	2.032	0.232289	0.388966	0.75862
AT1G18700.1	2.04	0.234233	0.387871	0.754721
AT1G18700.4	2.039	0.23121	0.386953	0.758635
AT1G53885.1	1.671	0.253731	0.379571	0.719602
AT5G63840.1	1.805	0.302145	0.364095	0.630722
AT5G02880.1	2.064	0.20846	0.369771	0.777999
AT5G26670.2	2.409	0.237522	0.393119	0.749934
AT5G26670.1	2.339	0.247736	0.392757	0.734295
AT1G69250.1	1.717	0.250971	0.365266	0.706763
AT1G69250.2	1.829	0.238386	0.370883	0.732321
AT3G03460.1	1.755	0.24523	0.375993	0.727238
AT2G22910.1	1.694	0.228789	0.373243	0.752713
AT1G31335.1	1.493	0.218899	0.369107	0.763737
AT3G58670.1	1.936	0.220791	0.37053	0.759473
AT3G11630.1	1.578	0.340815	0.359051	0.570761
AT1G62370.1	1.386	0.295724	0.369847	0.650333
AT5G16910.1	1.817	0.231428	0.377615	0.74921
AT2G33770.1	1.936	0.306127	0.371128	0.631816
AT5G26660.1	2.055	0.22814	0.386954	0.761384
AT5G53770.1	2.045	0.265463	0.370841	0.688887
AT1G08180.1	1.529	0.217366	0.368194	0.764786
AT5G52370.1	1.9	0.296319	0.372912	0.649091
AT1G20510.1	1.913	0.289643	0.368438	0.653466
AT1G20510.2	1.976	0.275681	0.368046	0.673655
AT2G25355.2	1.631	0.234804	0.375403	0.74157
AT2G25355.1	1.623	0.256976	0.379804	0.710711
AT3G53510.1	2.273	0.203634	0.384102	0.795462
AT2G23340.1	1.68	0.334564	0.375276	0.598924
AT5G09740.1	1.996	0.303992	0.370331	0.635537
AT2G44620.1	1.714	0.263076	0.357093	0.679264
AT4G35110.4	2.387	0.249709	0.378986	0.719717
AT4G35110.3	1.842	0.242074	0.369945	0.726707
AT4G35110.2	1.831	0.248509	0.369895	0.716352
AT4G35110.1	1.842	0.239568	0.368592	0.729225
AT2G42590.3	1.575	0.242481	0.359528	0.717558
AT5G49890.1	2.33	0.205878	0.392289	0.801949
AT4G14780.1	1.699	0.213498	0.375563	0.777049
AT5G09850.1	1.908	0.267693	0.370875	0.683784
AT1G16880.1	1.602	0.270878	0.374898	0.688382
AT1G17550.1	1.963	0.273599	0.370776	0.676687
AT2G27450.2	1.565	0.243454	0.359242	0.714474
AT4G09180.1	1.644	0.298121	0.372446	0.648223
AT1G45688.1	1.539	0.317234	0.358921	0.604537
AT1G28420.1	1.812	0.238507	0.369804	0.731823
AT1G45688.2	1.575	0.294522	0.360559	0.638304
AT2G21620.2	1.549	0.300575	0.366387	0.63313
AT4G35100.1	1.638	0.369088	0.351243	0.52636
AT4G35100.2	1.69	0.34764	0.361767	0.566777
AT2G21620.1	1.437	0.321841	0.36273	0.60285
AT4G00950.1	1.915	0.224447	0.408813	0.783005
AT1G32790.1	1.598	0.284585	0.363079	0.654048
AT4G00090.1	1.896	0.298813	0.369442	0.642551
AT1G29970.1	1.559	0.244953	0.368179	0.722522
AT1G29970.3	1.635	0.209879	0.361981	0.771999
AT1G29970.2	1.563	0.285083	0.367371	0.657937
AT5G57700.3	1.751	0.278874	0.377347	0.676036
AT5G57700.2	1.77	0.265877	0.376093	0.694333
AT5G57700.1	1.786	0.261724	0.377322	0.702092
AT2G02230.1	1.615	0.3524	0.361189	0.561255
AT5G10870.1	1.77	0.2616	0.378532	0.7041
AT5G57700.4	1.729	0.280101	0.374646	0.67137
AT1G29950.2	1.908	0.229554	0.380982	0.7557
AT1G29950.1	1.801	0.238391	0.376556	0.736924
AT4G00940.1	1.622	0.294503	0.370134	0.649421
AT1G64140.1	1.677	0.289304	0.362513	0.646394
AT1G13480.1	1.453	0.292641	0.359052	0.63831
AT4G33630.1	1.852	0.270134	0.3739	0.687787
AT4G33630.2	1.899	0.265852	0.376337	0.696313
AT1G32410.1	1.724	0.25558	0.380709	0.716952
AT3G48760.1	1.864	0.317131	0.372717	0.619041
AT4G32400.1	1.786	0.287852	0.373044	0.660268
AT1G17880.1	1.667	0.337018	0.3524	0.564356
AT5G01520.2	1.904	0.216418	0.39447	0.786343
AT1G36980.1	1.625	0.27667	0.359353	0.652156
AT5G62190.1	1.61	0.357492	0.358357	0.550438
AT4G31990.4	1.491	0.297297	0.355252	0.628114
AT4G24830.2	1.656	0.2809	0.366432	0.66358
AT5G10660.2	3.055	0.144298	0.487991	0.923885
AT2G14120.1	1.901	0.284593	0.368109	0.659199
AT4G17330.1	2.013	0.266819	0.376634	0.694366
AT2G14120.2	1.904	0.282768	0.367814	0.661588
AT1G07350.1	2.067	0.269833	0.379885	0.691453
AT4G02890.1	1.598	0.326625	0.35959	0.589319
AT4G02890.2	1.605	0.321206	0.356874	0.595017
AT1G09760.1	1.669	0.292032	0.368831	0.648767
AT4G02890.4	1.558	0.337296	0.352007	0.567067
AT3G26980.1	1.773	0.235319	0.370436	0.73827
AT2G41231.1	2.117	0.125423	0.403347	0.918187
AT1G27620.1	2.141	0.242766	0.384909	0.734614
AT3G17120.2	1.619	0.232755	0.367106	0.73904
AT1G74510.1	1.939	0.284554	0.37665	0.667422
AT5G25280.1	2.139	0.263207	0.383733	0.708341
AT1G74510.2	2.006	0.256294	0.377235	0.710176
AT1G70950.1	2.226	0.254434	0.37776	0.71286
AT5G13810.1	1.646	0.249642	0.37171	0.718456
AT4G09890.1	1.873	0.292075	0.371835	0.648159
AT4G27990.1	2.014	0.211878	0.37966	0.779754
AT1G72740.2	2.043	0.269364	0.378162	0.691175
AT3G52850.1	1.818	0.332184	0.36353	0.586414
AT1G74910.1	1.703	0.265234	0.367763	0.689304
AT3G04730.1	1.904	0.277518	0.37992	0.679813
AT1G74910.3	1.688	0.261926	0.366012	0.69245
AT1G74910.2	1.689	0.264415	0.368205	0.691692
AT3G04910.1	1.947	0.255835	0.372938	0.705665
AT2G44360.1	1.689	0.300295	0.36378	0.63092
AT2G44680.1	1.583	0.250691	0.370402	0.713202
AT5G03540.1	1.647	0.285773	0.36371	0.654117
AT5G03540.2	1.675	0.276512	0.364343	0.668328
AT2G44680.2	1.6	0.248368	0.372263	0.719132
AT5G05950.1	1.525	0.25144	0.370916	0.712117
AT3G43300.1	1.896	0.26733	0.366691	0.684165
AT4G38490.1	1.984	0.224381	0.38597	0.767082
AT2G43590.1	1.811	0.335972	0.368084	0.588195
AT1G30580.1	1.658	0.363752	0.363229	0.547597
AT5G04250.1	1.695	0.221288	0.369442	0.758117
AT2G18193.1	1.991	0.279308	0.368145	0.665933
AT5G60390.3	1.741	0.418238	0.348195	0.466173
AT1G75760.1	1.645	0.270215	0.366811	0.680564
AT5G42000.2	1.681	0.257009	0.378446	0.710189
AT5G45710.2	2.094	0.200789	0.368581	0.790405
AT1G53620.1	1.606	0.237887	0.366431	0.731289
AT5G45710.1	2.074	0.213096	0.371072	0.772001
AT3G04580.1	2.025	0.235963	0.374309	0.739223
AT5G20280.1	1.799	0.272201	0.368184	0.678097
AT2G43770.1	2.122	0.256898	0.389887	0.721384
AT2G39720.1	1.91	0.233606	0.380753	0.748766
AT3G53670.1	1.549	0.257287	0.362503	0.698035
AT3G53670.2	1.669	0.247896	0.363398	0.711745
AT3G57230.1	1.661	0.250299	0.369367	0.713912
AT3G57230.2	1.687	0.221652	0.36559	0.754623
AT5G13310.1	1.79	0.252448	0.372542	0.713142
AT2G20790.2	2.054	0.230885	0.376682	0.74842
AT3G06070.1	1.83	0.203628	0.378683	0.795003
AT2G06510.2	2.011	0.252825	0.384489	0.722885
AT1G24180.1	1.565	0.350621	0.35271	0.550286
AT1G59710.1	2.539	0.205063	0.38029	0.791461
AT3G01710.1	1.857	0.258641	0.381154	0.712614
AT5G10180.1	2.26	0.190423	0.388954	0.822703
AT4G31890.2	1.693	0.231287	0.365861	0.739478
AT3G01710.2	1.81	0.246652	0.373279	0.72389
AT3G51830.1	1.72	0.263204	0.374618	0.699035
AT5G12040.2	2.088	0.229749	0.367323	0.745079
AT4G02200.1	1.752	0.215663	0.377812	0.776149
AT1G17145.1	1.808	0.249249	0.382023	0.726764
AT4G02200.3	1.806	0.197125	0.376326	0.80413
AT4G02200.2	1.669	0.206077	0.375079	0.788428
AT2G30520.3	1.989	0.199211	0.374253	0.796062
AT2G30520.2	2.098	0.189135	0.375884	0.81334
AT2G30520.1	1.943	0.21051	0.376703	0.780926
AT5G24880.1	1.937	0.272769	0.375469	0.687377
AT1G08420.2	2.334	0.254812	0.383655	0.717687
AT3G21175.3	1.73	0.257124	0.386288	0.71976
AT1G08420.1	2.284	0.267736	0.382662	0.697034
AT5G40800.1	1.334	0.262997	0.363749	0.685871
AT3G02885.1	1.876	0.228228	0.372183	0.74964
AT3G05880.1	1.473	0.307086	0.375119	0.635574
AT5G48630.1	1.554	0.228521	0.364626	0.743018
AT2G34585.1	1.594	0.30571	0.374095	0.63683
AT5G48230.1	1.969	0.265176	0.364251	0.684689
AT4G24330.1	1.963	0.299361	0.358394	0.624502
AT3G12955.1	1.983	0.210553	0.3971	0.795495
AT4G03415.2	1.744	0.302782	0.369839	0.634393
AT2G30530.1	1.703	0.234203	0.369568	0.739681
AT4G03415.1	1.73	0.307027	0.371057	0.630519
AT5G02290.2	1.716	0.251576	0.3695	0.712972
AT3G09770.1	1.697	0.286671	0.362328	0.651297
AT1G50300.1	1.743	0.313103	0.368912	0.620536
AT3G12600.2	1.878	0.354704	0.379602	0.574518
AT3G12600.1	1.791	0.333395	0.370094	0.592058
AT4G24470.2	1.847	0.21913	0.377994	0.769787
AT4G24470.3	1.911	0.215638	0.377633	0.773686
AT4G24470.1	1.844	0.237396	0.382888	0.745729
AT5G01460.1	1.598	0.239255	0.375497	0.737048
AT5G11680.1	1.758	0.282268	0.376151	0.673766
AT5G03345.1	1.957	0.249459	0.389303	0.730154
AT3G55790.1	1.395	0.226379	0.381209	0.765849
AT5G17630.1	2.538	0.228285	0.380887	0.756176
AT4G28650.1	1.827	0.248231	0.367527	0.713829
AT1G72480.1	2.236	0.233237	0.406748	0.767578
AT3G20260.1	1.818	0.21648	0.366821	0.763738
AT1G69060.1	1.882	0.245868	0.379353	0.727147
AT3G15660.1	1.601	0.281251	0.368482	0.665712
AT2G48160.1	1.883	0.255608	0.373763	0.709724
AT1G36060.1	2.027	0.209401	0.375524	0.784424
AT1G53210.1	1.674	0.270811	0.368954	0.683195
AT3G15660.2	1.568	0.285674	0.370731	0.662178
AT5G14430.1	1.779	0.28413	0.37575	0.670378
AT5G14430.2	1.772	0.282577	0.37532	0.672184
AT5G59880.2	2.152	0.370011	0.372616	0.547791
AT1G79080.1	2.017	0.221493	0.373472	0.760882
AT4G33480.1	1.731	0.224173	0.370188	0.751978
AT3G47370.2	1.578	0.337453	0.366972	0.586786
AT1G16470.2	1.648	0.232527	0.368653	0.742856
AT5G64880.1	1.363	0.253568	0.362845	0.702938
AT1G16470.1	1.575	0.266138	0.368063	0.689723
AT4G31890.1	1.702	0.233763	0.367229	0.736704
AT3G02040.1	2.326	0.209904	0.392923	0.795617
AT5G50210.1	1.921	0.23778	0.378733	0.738565
AT5G09443.1	1.652	0.272146	0.369441	0.679894
AT3G14980.1	2.536	0.216028	0.385375	0.777138
AT1G42990.1	1.778	0.268437	0.374217	0.692239
AT5G46570.1	1.869	0.228799	0.371653	0.747631
AT1G30840.2	1.555	0.261686	0.375352	0.704186
AT1G31150.1	1.982	0.200286	0.378356	0.79762
AT1G04300.3	1.717	0.286911	0.361875	0.65065
AT1G04300.2	1.733	0.279782	0.362808	0.662485
AT1G04300.1	1.716	0.290422	0.362471	0.6462
AT1G51570.1	1.703	0.300379	0.367348	0.636094
AT5G42060.1	1.743	0.258151	0.389818	0.722117
AT5G48385.1	1.819	0.306272	0.360831	0.618587
AT5G64220.2	1.967	0.231909	0.382532	0.752875
AT5G64220.1	1.945	0.234579	0.382508	0.748862
AT2G40430.2	1.803	0.30138	0.361485	0.624769
AT2G40430.3	1.711	0.317136	0.35299	0.592692
AT5G43020.1	1.828	0.224322	0.37683	0.759148
AT2G40430.1	1.78	0.320124	0.359416	0.595566
AT2G16405.1	1.691	0.237215	0.381469	0.744728
AT5G42100.2	1.587	0.260532	0.366774	0.695929
AT5G42100.1	1.599	0.266621	0.367686	0.687621
AT3G16310.1	1.646	0.291314	0.368552	0.650033
AT5G58470.1	1.694	0.301442	0.36933	0.635515
AT5G58470.2	1.728	0.295698	0.371557	0.645924
AT5G63670.1	1.4	0.257504	0.357069	0.690569
AT3G54640.1	1.833	0.256291	0.370633	0.705
AT5G63670.2	1.531	0.205204	0.36333	0.779564
AT3G52520.1	1.59	0.275854	0.369795	0.6753
AT3G10670.1	1.739	0.264725	0.362298	0.685662
AT5G60710.1	1.727	0.235942	0.377519	0.740899
AT2G40410.1	2.049	0.261231	0.379425	0.701704
AT2G40410.2	1.966	0.259219	0.375178	0.702594
AT3G58970.1	2.24	0.230386	0.377157	0.750495
AT1G25250.1	2.083	0.195105	0.370439	0.800146
AT5G37790.1	1.993	0.272967	0.378296	0.68333
AT1G58180.1	1.645	0.286092	0.36206	0.6523
AT1G58180.2	1.651	0.292326	0.362713	0.643736
AT1G58180.3	1.598	0.274018	0.358924	0.666958
AT1G58180.4	1.651	0.289807	0.362681	0.647884
AT5G43400.1	1.796	0.295722	0.370315	0.647294
AT5G24710.1	2.05	0.277935	0.37699	0.677746
AT2G34430.1	2.234	0.197619	0.39006	0.812111
AT3G29035.1	2.169	0.209798	0.387248	0.790722
AT3G27010.1	1.575	0.229721	0.371618	0.748955
AT1G54580.1	1.651	0.31724	0.366656	0.606289
AT2G32510.1	1.495	0.307852	0.359164	0.615925
AT5G28626.1	2.514	0.193919	0.40369	0.826132
AT2G01820.1	1.674	0.243643	0.364565	0.719373
AT2G47160.1	2.11	0.249572	0.377942	0.723144
AT1G51140.1	1.851	0.281004	0.372396	0.669714
AT2G47160.2	2.136	0.243832	0.378111	0.731929
AT5G12210.2	1.532	0.27522	0.363402	0.668188
AT4G10310.1	2.085	0.234402	0.389843	0.752156
AT5G55610.1	1.702	0.284651	0.372792	0.667284
AT5G12210.1	1.535	0.277175	0.364147	0.666427
AT1G20850.1	1.695	0.292297	0.359836	0.63957
AT2G18570.1	1.605	0.293484	0.370318	0.651261
AT1G14380.2	2.028	0.275647	0.376168	0.681121
AT1G14380.3	1.963	0.285903	0.376538	0.665986
AT1G74970.1	1.831	0.227283	0.392766	0.768896
AT1G14380.1	1.961	0.287977	0.376282	0.662816
AT1G47530.1	1.911	0.242326	0.373833	0.72919
AT3G02680.1	2.214	0.191877	0.390498	0.820188
AT2G42910.1	1.486	0.282166	0.356446	0.650895
AT1G60390.1	1.69	0.255092	0.380599	0.718687
AT4G02590.1	1.635	0.308386	0.361486	0.616474
AT3G62650.2	1.446	0.281012	0.358572	0.65652
AT3G62650.1	1.575	0.297094	0.358038	0.630725
AT5G24530.1	1.786	0.242917	0.372208	0.728974
AT3G03140.1	1.728	0.265072	0.372459	0.694391
AT3G61960.1	2.25	0.20194	0.378169	0.795146
AT1G26960.1	1.867	0.250946	0.384364	0.727316
AT1G34360.1	1.857	0.227372	0.375887	0.755202
AT4G27720.1	2.047	0.254656	0.375968	0.711664
AT2G21050.1	1.99	0.246171	0.377309	0.725284
AT3G61020.1	2.177	0.190684	0.379518	0.814169
AT3G13435.1	1.677	0.253197	0.379089	0.712971
AT3G28300.1	1.815	0.201222	0.369839	0.791038
AT3G44330.1	1.848	0.268272	0.368726	0.683828
AT5G49510.1	1.89	0.27545	0.374433	0.679677
AT2G22010.2	3.334	0.200883	0.416518	0.822414
AT4G00630.1	1.923	0.271193	0.391212	0.703509
AT4G27740.1	1.7	0.28466	0.376734	0.669576
AT5G45390.1	1.729	0.265051	0.374283	0.695893
AT1G15480.1	2.208	0.25249	0.392477	0.730342
AT1G75440.1	1.604	0.269078	0.383041	0.701863
AT5G44670.1	2.251	0.211741	0.37694	0.778563
AT2G38640.1	1.961	0.281637	0.381683	0.678151
AT3G48340.1	1.658	0.338145	0.36362	0.576028
AT4G00355.1	1.717	0.272177	0.369534	0.682019
AT4G00355.2	1.729	0.285613	0.374001	0.667132
AT4G00355.3	1.756	0.254603	0.37174	0.711566
AT4G00355.4	1.508	0.26461	0.373078	0.697843
AT3G45240.3	2.126	0.24144	0.388046	0.743237
AT3G45240.2	2.084	0.245011	0.386798	0.737258
AT3G48360.1	1.638	0.334937	0.357745	0.576772
AT1G78430.1	2.038	0.241009	0.381001	0.735944
AT4G11310.1	2.276	0.187859	0.382369	0.820004
AT5G17160.1	1.648	0.318518	0.359275	0.60274
AT3G21140.1	1.744	0.259252	0.384517	0.716729
AT1G26620.1	2.26	0.236133	0.392777	0.751823
AT2G17350.1	1.865	0.366174	0.371039	0.55386
AT1G78020.1	1.705	0.259857	0.383649	0.715699
AT5G43720.1	1.54	0.272928	0.361735	0.672394
AT1G09690.1	1.663	0.362145	0.357088	0.544355
AT4G01730.1	1.777	0.261076	0.385722	0.71461
AT3G50210.2	1.793	0.293498	0.37602	0.65589
AT3G50210.3	1.741	0.300062	0.373487	0.644333
AT5G20680.2	1.808	0.261949	0.368531	0.695486
AT3G57530.1	1.981	0.292188	0.37283	0.653181
AT5G03710.1	3.945	0.406537	0.601721	0.6582
AT4G01750.1	2.024	0.263431	0.374398	0.697214
AT3G20100.1	1.954	0.234652	0.372313	0.740016
AT2G17340.1	1.918	0.288702	0.385287	0.673721
AT1G01260.3	2.49	0.212313	0.398676	0.794273
AT1G01260.2	2.415	0.215564	0.394526	0.78607
AT1G01260.1	2.492	0.211459	0.39814	0.795057
AT5G49300.1	1.395	0.245373	0.371574	0.721243
AT4G18890.1	1.532	0.226078	0.360893	0.742344
AT1G14040.1	1.739	0.267634	0.365836	0.680162
AT4G12080.1	1.779	0.254611	0.364693	0.701129
AT5G53940.1	1.649	0.252704	0.375782	0.716333
AT5G03730.2	1.889	0.273985	0.371256	0.676357
AT5G03730.1	1.914	0.276404	0.373532	0.675281
AT3G18535.1	2.005	0.260729	0.388965	0.71771
AT3G02720.1	1.62	0.283278	0.366532	0.660494
AT5G56740.1	1.929	0.251319	0.380004	0.720354
AT5G49015.2	1.519	0.242578	0.360525	0.716384
AT5G13890.3	1.75	0.229143	0.373396	0.751219
AT2G19430.1	1.893	0.235402	0.378948	0.744542
AT5G14600.1	1.746	0.194547	0.368511	0.800688
AT3G02570.1	2.363	0.259108	0.399564	0.722816
AT2G18510.1	1.765	0.273227	0.372118	0.677611
AT1G35160.2	1.77	0.280702	0.364308	0.660036
AT5G09860.1	2.156	0.232115	0.384513	0.752095
AT3G25030.1	2.15	0.22894	0.383857	0.75792
AT1G18300.1	2.172	0.228219	0.381919	0.757866
AT2G11890.2	1.764	0.271856	0.370428	0.67845
AT4G08980.2	1.927	0.231988	0.371531	0.743729
AT4G24265.1	2.16	0.25565	0.380165	0.713291
AT4G08980.4	1.761	0.27844	0.376313	0.678219
AT1G50430.1	1.758	0.320445	0.366847	0.609175
AT1G50430.2	1.773	0.315713	0.364448	0.613433
AT5G07740.1	1.984	0.265917	0.378557	0.698487
AT5G26850.1	1.872	0.254121	0.381646	0.718574
AT3G17410.1	1.627	0.265534	0.364005	0.68413
AT5G65760.1	1.85	0.234849	0.377544	0.742099
AT1G19400.2	1.523	0.28906	0.363387	0.647776
AT4G14650.1	1.878	0.269851	0.374172	0.68592
AT1G19600.1	1.517	0.327619	0.362148	0.593441
AT3G13730.1	1.823	0.265035	0.373717	0.696281
AT3G13690.1	2.041	0.216166	0.374095	0.770167
AT5G12980.1	1.756	0.210711	0.365313	0.770779
AT1G71210.1	2.359	0.187437	0.378947	0.818341
AT3G01472.1	1.822	0.271029	0.36924	0.679456
AT3G13320.1	1.981	0.260352	0.382726	0.708428
AT3G21160.1	1.931	0.26663	0.372639	0.691068
AT3G58140.1	1.831	0.234083	0.37601	0.742104
AT3G01070.1	1.645	0.193786	0.36743	0.801887
AT3G15220.1	1.753	0.223208	0.372421	0.759059
AT4G37930.1	1.587	0.25041	0.373271	0.719162
AT2G31740.1	1.875	0.226229	0.379867	0.758503
AT1G13360.1	1.669	0.249187	0.374855	0.718723
AT1G13360.3	1.606	0.256432	0.371581	0.704642
AT1G13360.2	1.645	0.251672	0.375616	0.716202
AT3G18140.1	1.657	0.264411	0.362101	0.683974
AT3G14660.1	1.984	0.214274	0.374049	0.772553
AT1G09310.1	2.441	0.226453	0.404327	0.774477
AT5G15770.1	1.556	0.283779	0.3831	0.679719
AT5G38720.1	1.606	0.342411	0.354861	0.566024
AT4G29410.1	1.618	0.357783	0.359993	0.551462
AT3G59068.1	1.417	0.162325	0.360175	0.84776
AT4G12340.1	1.675	0.327838	0.364667	0.594081
AT5G19150.1	1.827	0.236008	0.376602	0.740992
AT5G19150.2	1.809	0.245194	0.378599	0.72881
AT1G13340.1	1.827	0.251805	0.381576	0.721898
AT5G50440.1	1.895	0.252819	0.371773	0.708237
AT3G11320.1	1.899	0.233076	0.377955	0.746803
AT3G22260.2	1.907	0.248659	0.379518	0.727646
AT3G22260.3	1.862	0.252983	0.377176	0.718837
AT3G22260.1	1.942	0.250292	0.383229	0.728399
AT3G15070.1	1.943	0.252477	0.377735	0.718706
AT3G09920.2	1.818	0.263999	0.368916	0.693323
AT1G03090.2	1.736	0.296159	0.370921	0.64631
AT3G27460.1	1.802	0.234582	0.374057	0.742993
AT1G03090.1	1.741	0.290477	0.371683	0.655468
AT5G50960.1	1.605	0.295569	0.370425	0.648625
AT5G26000.1	2.035	0.205227	0.391273	0.80204
AT5G26000.2	2.034	0.204603	0.390992	0.802825
AT3G04930.2	1.692	0.25933	0.366799	0.697095
AT4G25890.1	2.068	0.289413	0.380699	0.66551
AT3G04930.1	1.685	0.279364	0.367346	0.667069
AT3G22480.2	1.488	0.306624	0.35748	0.616954
AT3G22480.1	1.526	0.298201	0.355982	0.625005
AT1G68850.1	1.82	0.271332	0.3783	0.689449
AT1G70670.1	1.651	0.279971	0.367678	0.66472
AT1G30970.2	1.787	0.264326	0.380582	0.702503
AT1G30970.1	1.749	0.27483	0.380488	0.68781
AT5G51410.1	1.96	0.287562	0.369177	0.6551
AT4G25870.1	1.745	0.261502	0.360194	0.686184
AT1G07930.1	1.552	0.383549	0.348926	0.506189
AT4G14600.1	1.837	0.244232	0.381372	0.731276
AT4G39780.1	1.813	0.209261	0.376865	0.785023
AT2G16900.1	2.064	0.254147	0.375301	0.712171
AT2G16900.3	2.102	0.263755	0.377928	0.699105
AT2G16900.2	1.906	0.287049	0.366742	0.652277
AT1G73180.2	2.209	0.275851	0.37338	0.675787
AT1G04780.1	1.864	0.28017	0.361288	0.657224
AT2G29540.1	1.678	0.328609	0.372339	0.605196
AT5G50315.1	1.975	0.241728	0.377653	0.735807
AT5G35450.1	2.069	0.256926	0.383293	0.715617
AT1G75630.2	2.511	0.206746	0.385737	0.792306
AT1G75630.1	2.063	0.285029	0.375808	0.663839
AT1G10450.1	2.401	0.252207	0.39037	0.727847
AT5G20290.1	1.905	0.419686	0.357678	0.478323
AT5G13680.1	2.336	0.244189	0.387834	0.736379
AT1G72650.1	1.72	0.241253	0.372519	0.727924
AT2G05250.1	1.742	0.270186	0.365163	0.676364
AT4G14030.1	1.778	0.315625	0.368125	0.614595
AT1G53110.1	1.967	0.230226	0.373297	0.749317
AT2G28590.1	2.119	0.227752	0.386753	0.761023
AT3G52105.1	2.635	0.230321	0.429115	0.785266
AT5G49850.1	1.649	0.212717	0.369091	0.771088
AT3G09920.1	1.805	0.266189	0.36832	0.689404
AT2G01670.1	2.136	0.290116	0.37513	0.657767
AT3G56310.1	1.747	0.32215	0.372604	0.612826
AT3G56310.2	1.737	0.303763	0.37131	0.636747
AT2G32180.1	2.141	0.259215	0.391903	0.720083
AT1G77020.1	2.332	0.2566	0.376068	0.70927
AT4G36210.1	1.842	0.286031	0.369634	0.65874
AT1G78040.2	1.343	0.412243	0.347105	0.476523
AT4G36210.3	1.814	0.301755	0.367796	0.633621
AT5G59440.1	1.455	0.272484	0.361639	0.673197
AT3G07640.1	1.87	0.249633	0.38242	0.728082
AT5G61420.1	1.899	0.245474	0.38414	0.733974
AT1G80670.1	1.953	0.251406	0.382472	0.724169
AT2G41690.1	1.505	0.235745	0.373632	0.741487
AT4G13640.2	2.066	0.254909	0.387356	0.722219
AT4G13640.1	1.995	0.247095	0.380799	0.727598
AT5G13240.1	1.775	0.257226	0.38373	0.716408
AT4G38710.2	1.847	0.351014	0.358635	0.55552
AT3G07660.1	2.153	0.259843	0.372634	0.702117
AT4G31130.1	1.77	0.246517	0.375032	0.72384
AT3G04570.1	1.677	0.319342	0.363759	0.606905
AT4G08850.2	2.425	0.241223	0.380885	0.736532
AT3G15360.1	1.855	0.229503	0.367225	0.744401
AT1G17340.1	2.071	0.228873	0.379607	0.753152
AT3G09890.1	2.001	0.259919	0.381703	0.709641
AT4G22756.1	2.112	0.187265	0.371794	0.813971
AT2G21470.3	1.974	0.238607	0.378969	0.740051
AT2G21470.2	2.01	0.223099	0.377975	0.762283
AT2G21470.1	1.972	0.244659	0.380623	0.732031
AT5G49160.1	2.101	0.255281	0.374433	0.711258
AT2G02560.2	1.792	0.261993	0.379091	0.705463
AT1G23820.1	1.739	0.315733	0.363759	0.612801
AT4G19185.1	1.668	0.24118	0.375888	0.732215
AT2G02560.1	1.789	0.26314	0.379021	0.70362
AT5G01200.1	1.992	0.229553	0.381675	0.755131
AT2G35630.1	2.226	0.303012	0.373262	0.638361
AT3G02260.1	2.404	0.20558	0.375037	0.787046
AT5G60670.1	1.794	0.371081	0.367999	0.541998
AT5G41700.5	1.949	0.249188	0.370382	0.714032
AT2G25090.1	2.309	0.235449	0.407628	0.768875
AT5G41700.1	1.739	0.323192	0.357978	0.589671
AT3G44100.1	1.46	0.312904	0.36205	0.61264
AT5G41700.3	1.792	0.254677	0.359666	0.692546
AT2G37230.1	1.47	0.299334	0.367495	0.641104
AT3G12870.1	1.709	0.250803	0.380105	0.722505
AT3G16060.1	1.834	0.32494	0.367721	0.603359
AT3G13860.1	1.698	0.299571	0.364808	0.636404
AT4G25810.1	1.903	0.245199	0.379322	0.731692
AT1G06470.2	1.798	0.232111	0.376092	0.746811
AT3G10220.1	2.086	0.313916	0.381305	0.626927
AT3G59970.1	1.847	0.309235	0.360301	0.616723
AT3G59970.2	1.528	0.313868	0.356226	0.606797
AT3G59970.3	1.779	0.325482	0.356423	0.589006
AT2G31020.1	1.74	0.259572	0.366834	0.697496
AT4G24920.1	1.465	0.314624	0.35555	0.604385
AT2G20950.4	1.863	0.251298	0.366783	0.708438
AT4G08470.1	2.228	0.213753	0.393515	0.788372
AT1G22790.1	1.723	0.251755	0.370168	0.711862
AT1G22790.2	1.721	0.256365	0.369911	0.703777
AT5G27470.1	1.805	0.31518	0.35504	0.598767
AT3G06390.1	1.487	0.313415	0.359757	0.606974
AT3G58470.1	1.677	0.257445	0.383404	0.715169
AT1G55020.1	1.732	0.306004	0.359855	0.617258
AT1G56300.1	2.178	0.220869	0.377809	0.765211
AT1G21920.1	1.794	0.263485	0.361782	0.682201
AT4G09000.2	1.771	0.304045	0.363851	0.625627
AT4G09000.1	1.713	0.338062	0.3566	0.569535
AT5G60800.2	1.661	0.29404	0.361559	0.63858
AT5G60800.1	1.703	0.300484	0.363779	0.630973
AT4G25130.1	1.983	0.287197	0.376665	0.661751
AT2G47470.4	1.538	0.383229	0.350829	0.509415
AT2G47470.3	1.527	0.381014	0.351635	0.51324
AT2G47470.2	1.744	0.380779	0.353937	0.515575
AT2G47470.1	1.707	0.39018	0.348732	0.498129
AT5G04990.1	1.531	0.293851	0.360016	0.639537
AT3G46430.1	1.615	0.303086	0.359976	0.616806
AT3G05230.2	1.406	0.253165	0.367346	0.710802
AT5G23290.1	1.589	0.329262	0.36597	0.594094
AT3G47860.1	2.324	0.205874	0.404941	0.807877
AT3G27740.1	1.834	0.280075	0.370662	0.670575
AT2G26970.2	1.467	0.256405	0.365789	0.70231
AT2G26970.1	1.471	0.276586	0.364291	0.668223
AT1G53390.1	1.988	0.217916	0.374347	0.7663
AT5G64560.1	1.967	0.222784	0.373579	0.760781
AT3G05230.1	1.83	0.23335	0.368311	0.739635
AT2G40370.1	1.934	0.254658	0.384106	0.719807
AT4G20960.1	2.172	0.225417	0.383155	0.763115
AT3G28510.1	1.61	0.286279	0.362417	0.652076
AT2G39770.1	1.316	0.312441	0.350271	0.600418
AT4G12460.1	1.946	0.258323	0.379185	0.707809
AT4G12460.2	1.922	0.246289	0.38026	0.72725
AT2G39770.2	1.316	0.314486	0.350847	0.598447
AT4G32850.8	1.677	0.282615	0.368817	0.665469
AT1G72690.1	1.551	0.287238	0.376288	0.667542
AT1G72500.1	2.186	0.22997	0.376328	0.750006
AT1G34220.2	1.819	0.235933	0.370723	0.736349
AT1G27380.2	1.533	0.225311	0.3682	0.75418
AT1G19450.1	1.943	0.245293	0.382265	0.731725
AT2G27040.1	1.96	0.240436	0.381006	0.73693
AT2G27040.2	1.972	0.233844	0.377904	0.744044
AT3G58780.3	7	0.213526	1.19447	0.969473
AT4G05020.1	2.04	0.260705	0.391927	0.718845
AT4G05020.2	2.071	0.242132	0.388309	0.743661
AT5G63940.1	1.667	0.2771	0.36567	0.667921
AT4G19490.1	1.967	0.250928	0.378527	0.719995
AT4G19490.2	1.992	0.245925	0.378243	0.727157
AT5G01260.2	1.861	0.239751	0.381014	0.738746
AT5G01260.1	2.084	0.215079	0.381658	0.777413
AT3G12030.1	1.495	0.247855	0.360194	0.705793
AT5G61330.1	1.697	0.315229	0.366089	0.61677
AT1G12650.2	2.05	0.274976	0.376664	0.681146
AT1G12650.3	2.056	0.273153	0.37669	0.683236
AT2G28290.1	2.181	0.252174	0.378356	0.718289
AT1G12650.1	2.056	0.268549	0.375857	0.689549
AT5G19910.2	2.888	0.195722	0.390361	0.812417
AT1G03210.1	1.752	0.265349	0.367935	0.685244
AT1G12650.4	2.046	0.267165	0.376662	0.692469
AT4G08320.1	1.823	0.269668	0.373928	0.688479
AT3G19770.2	2.027	0.216768	0.378589	0.772195
AT5G11640.1	1.757	0.243929	0.375501	0.726204
AT3G23820.1	1.644	0.316619	0.363802	0.609778
AT3G12050.1	1.724	0.332219	0.369582	0.593824
AT3G08890.1	1.808	0.263128	0.375357	0.7006
AT3G08890.2	1.927	0.243883	0.375918	0.729218
AT5G02530.2	1.619	0.314387	0.377096	0.62753
AT2G33550.1	1.553	0.313767	0.351258	0.595922
AT5G02530.1	1.625	0.321218	0.369592	0.609139
AT4G09340.1	1.947	0.21842	0.379638	0.769524
AT1G72040.1	2.27	0.266856	0.394333	0.710663
AT1G04280.1	1.903	0.275973	0.381421	0.685191
AT5G10750.1	1.944	0.256688	0.370505	0.704186
AT5G40720.1	2.574	0.19366	0.410759	0.830255
AT1G29380.1	1.619	0.206427	0.368698	0.781563
AT2G23080.1	1.88	0.254617	0.37714	0.712169
AT2G23080.2	1.91	0.24001	0.381822	0.739579
AT4G00890.1	1.705	0.251156	0.376546	0.720588
AT1G01910.5	1.78	0.265351	0.37438	0.697039
AT1G01910.4	1.792	0.267797	0.372651	0.69104
AT5G10770.1	2.508	0.263201	0.383384	0.705047
AT1G54390.6	1.781	0.251424	0.38367	0.724268
AT1G01910.1	1.761	0.283267	0.37292	0.668091
AT1G01910.3	1.836	0.278594	0.372407	0.674009
AT1G01910.2	1.742	0.295114	0.372332	0.65033
AT2G27290.1	1.842	0.253278	0.398872	0.735562
AT4G01280.1	2.111	0.268907	0.38096	0.693263
AT4G01280.2	2.086	0.271689	0.381183	0.689533
AT5G20170.1	2.048	0.24778	0.384039	0.730071
AT4G33350.2	2.22	0.248362	0.394145	0.733817
AT4G31300.3	1.899	0.300172	0.37268	0.641479
AT3G13810.1	1.895	0.232379	0.366486	0.737869
AT5G27410.1	1.907	0.246456	0.388177	0.735102
AT5G27410.2	2	0.254395	0.383555	0.718117
AT3G13810.2	1.899	0.221501	0.36676	0.755898
AT4G31300.1	1.838	0.325971	0.366971	0.59804
AT3G16570.1	1.611	0.240738	0.374545	0.735569
AT1G61240.3	1.781	0.243119	0.380527	0.735755
AT1G61240.2	1.757	0.24549	0.378554	0.730245
AT1G61240.1	1.763	0.241994	0.378238	0.735414
AT1G06890.2	1.787	0.268054	0.375297	0.692565
AT1G61240.4	1.818	0.234762	0.380261	0.748213
AT2G20190.1	2.136	0.262649	0.38381	0.707977
AT5G27990.1	1.38	0.299204	0.356534	0.627969
AT3G04080.1	2.152	0.273024	0.390013	0.696636
AT2G41710.1	1.784	0.268701	0.368833	0.68467
AT2G41710.2	1.798	0.258021	0.368502	0.700811
AT2G16280.1	1.858	0.239206	0.377686	0.738879
AT2G35020.1	1.699	0.24454	0.379211	0.731178
AT3G43520.1	1.73	0.31943	0.371792	0.613032
AT5G49930.1	1.876	0.265067	0.37333	0.693279
AT4G39180.1	1.814	0.224877	0.378162	0.75856
AT4G30390.1	2.169	0.254868	0.401623	0.734616
AT3G17430.1	1.864	0.207341	0.377957	0.787153
AT4G18430.1	1.904	0.232284	0.380752	0.751281
AT5G38560.1	1.964	0.277234	0.377039	0.679362
AT3G24490.1	1.71	0.327393	0.358255	0.585432
AT1G23100.1	1.58	0.257424	0.373169	0.708131
AT1G77510.1	1.908	0.269682	0.36843	0.683787
AT5G54770.1	1.934	0.230823	0.371267	0.745482
AT2G45680.1	1.769	0.205706	0.368874	0.781387
AT1G27150.1	1.514	0.276127	0.360305	0.666453
AT5G28920.1	2.839	0.149861	0.408035	0.889717
AT5G41360.1	2.112	0.239429	0.382837	0.740272
AT3G47490.1	1.822	0.210017	0.365326	0.773696
AT4G19110.1	1.84	0.286384	0.359408	0.647493
AT4G19110.3	1.379	0.297458	0.352842	0.623914
AT4G19110.2	1.533	0.287673	0.362407	0.650042
AT1G17180.1	1.668	0.247802	0.382917	0.729123
AT5G19190.1	1.562	0.255802	0.363696	0.69999
AT2G04390.1	1.427	0.331091	0.342608	0.561312
AT4G34800.1	1.493	0.228162	0.363011	0.743774
AT1G77350.2	1.404	0.233177	0.36277	0.735912
AT1G77350.1	1.312	0.23181	0.353024	0.728256
AT5G12470.1	1.688	0.284856	0.367945	0.659897
AT3G13440.1	1.955	0.279138	0.363559	0.660749
AT1G64990.1	2.103	0.258968	0.379772	0.709509
AT1G64990.2	2.117	0.26078	0.382737	0.709899
AT3G50640.1	1.563	0.250562	0.364025	0.706787
AT4G38510.1	1.403	0.304666	0.353676	0.61603
AT4G38510.2	1.408	0.305373	0.353736	0.615002
AT4G38510.3	1.418	0.302211	0.354188	0.619901
AT4G38510.4	1.413	0.303767	0.354694	0.61852
AT4G38510.5	1.415	0.294906	0.353223	0.628997
AT1G68260.1	1.92	0.256828	0.384581	0.718433
AT1G57680.2	1.827	0.250277	0.373383	0.714822
AT1G61450.1	1.619	0.26411	0.362705	0.678295
AT1G57680.1	1.841	0.250662	0.372578	0.71306
AT1G55340.1	1.712	0.317381	0.354869	0.594769
AT1G55340.2	1.831	0.324605	0.356007	0.584609
AT3G18600.1	1.525	0.284965	0.354167	0.643809
AT5G51300.3	1.779	0.25895	0.365539	0.694962
AT5G51300.2	1.76	0.259404	0.3643	0.693158
AT2G17820.1	2.03	0.255778	0.381103	0.71547
AT2G34750.1	1.895	0.283882	0.368649	0.660857
AT4G09320.1	1.654	0.338112	0.36639	0.582826
AT2G38290.1	1.91	0.214048	0.379205	0.777996
AT5G59160.2	1.852	0.238209	0.38459	0.746657
AT2G38290.2	2.022	0.206551	0.386961	0.795897
AT5G52560.1	2.011	0.211061	0.368034	0.772407
AT5G16220.1	1.77	0.272437	0.37218	0.682314
AT4G33140.1	1.666	0.235051	0.374655	0.742991
AT5G09410.2	1.904	0.236942	0.38327	0.746495
AT3G61415.2	1.799	0.226206	0.373412	0.753827
AT1G10650.1	2.257	0.227189	0.380436	0.758454
AT1G10650.2	2.286	0.211746	0.377384	0.780258
AT1G10840.2	1.92	0.270774	0.369403	0.683923
AT5G52400.1	1.789	0.241886	0.37678	0.733173
AT4G03190.1	1.526	0.26902	0.370339	0.688586
AT1G15420.1	1.809	0.302314	0.372825	0.638561
AT2G39300.2	2.017	0.260369	0.372367	0.69819
AT5G19090.1	1.739	0.295	0.362127	0.636834
AT3G18140.2	1.561	0.240321	0.365114	0.725937
AT3G26420.1	2.234	0.206396	0.371485	0.785975
AT5G51440.1	1.733	0.239542	0.3699	0.729748
AT4G21100.1	2.178	0.22546	0.379978	0.759465
AT3G46450.2	2.023	0.212064	0.375306	0.776166
AT3G46450.1	2.022	0.216011	0.376434	0.770688
AT2G39360.1	2.281	0.189957	0.375686	0.814437
AT3G09970.1	1.76	0.230917	0.374662	0.744978
AT2G29450.1	1.571	0.221742	0.369665	0.759044
AT3G15390.1	1.771	0.236016	0.376933	0.741981
AT2G45540.1	2.379	0.230618	0.374741	0.747113
AT5G47710.1	2.149	0.26438	0.369086	0.687303
AT2G45540.2	2.404	0.224994	0.373854	0.755097
AT3G15390.2	1.665	0.253897	0.370241	0.708274
AT3G14075.1	2.232	0.204491	0.373878	0.788816
AT3G01910.2	1.836	0.321338	0.365168	0.60401
AT3G09630.2	1.55	0.36561	0.358897	0.542141
AT2G39090.2	1.629	0.241827	0.36815	0.725493
AT3G54430.1	1.929	0.233682	0.379313	0.749621
AT2G20130.1	1.755	0.260676	0.371886	0.698786
AT3G01910.1	1.774	0.300068	0.368892	0.638233
AT5G41150.1	2.033	0.23338	0.375222	0.742115
AT2G42320.1	1.881	0.256265	0.383331	0.716488
AT2G42320.2	1.884	0.254133	0.381458	0.71726
AT5G47710.2	2.197	0.239178	0.371481	0.72942
AT4G25740.2	1.996	0.264991	0.375027	0.694511
AT4G25740.1	1.852	0.292912	0.363823	0.642753
AT3G03700.1	1.994	0.228033	0.37545	0.752117
AT4G38350.1	2.048	0.247658	0.379912	0.725725
AT1G64740.1	1.786	0.212196	0.370468	0.773777
AT5G48030.1	1.571	0.269579	0.367646	0.680898
AT3G51930.1	2.05	0.237602	0.375116	0.737739
AT5G66510.2	1.588	0.270531	0.360361	0.674739
AT4G09730.1	2.126	0.274157	0.38443	0.690134
AT3G21295.1	1.928	0.251618	0.382321	0.723114
AT5G66510.1	1.584	0.285736	0.35893	0.649283
AT2G15570.1	1.768	0.268711	0.370964	0.686481
AT1G54170.1	2.108	0.272966	0.381058	0.690948
AT2G15570.2	1.815	0.271275	0.380226	0.693077
AT3G02900.1	1.766	0.304634	0.375077	0.640808
AT3G02900.2	1.801	0.27186	0.377676	0.691624
AT4G39710.1	3.681	0.119408	0.396265	0.918615
AT4G34230.1	1.852	0.347657	0.352656	0.554794
AT4G39710.2	4.024	0.124892	0.415881	0.920217
AT1G79350.1	2.001	0.25259	0.381619	0.719426
AT1G25275.3	1.584	0.216626	0.362989	0.763085
AT1G25275.2	1.567	0.273737	0.380075	0.692598
AT1G25275.1	1.515	0.264381	0.370314	0.695317
AT1G53430.2	1.916	0.234172	0.377341	0.745128
AT5G40550.2	1.779	0.231149	0.378712	0.751841
AT3G23150.1	2.137	0.209864	0.385559	0.788059
AT5G40550.1	1.825	0.237193	0.381042	0.745278
AT3G15640.2	1.688	0.288361	0.368148	0.656323
AT3G15640.1	1.732	0.29434	0.375357	0.654796
AT4G32290.1	2.268	0.24109	0.387147	0.741508
AT1G15860.2	2.178	0.248803	0.383156	0.728386
AT1G01040.2	2.432	0.223305	0.378006	0.761993
AT5G14030.4	1.895	0.277984	0.368736	0.668754
AT2G46170.2	2.382	0.218006	0.393801	0.778197
AT5G14030.1	1.91	0.311315	0.362727	0.6103
AT5G14030.2	1.903	0.278654	0.369908	0.669022
AT5G14030.3	1.902	0.279127	0.36842	0.666546
AT4G36920.2	1.688	0.221234	0.366939	0.757635
AT4G36920.1	1.673	0.241947	0.372389	0.7297
AT5G14050.1	1.735	0.307071	0.375849	0.634293
AT1G69640.1	1.914	0.263184	0.375074	0.696806
AT3G18000.1	1.728	0.303525	0.371833	0.638405
AT3G12990.3	1.914	0.260944	0.382241	0.709424
AT3G12990.2	1.915	0.260294	0.383116	0.711503
AT5G57490.1	1.496	0.304935	0.357985	0.619811
AT3G13870.2	1.831	0.334304	0.362407	0.584156
AT3G13870.1	1.799	0.337773	0.35978	0.576209
AT1G53165.2	1.728	0.250611	0.373212	0.716393
AT1G53165.3	1.71	0.251167	0.371359	0.713933
AT1G53165.1	1.691	0.257288	0.37096	0.704359
AT1G56680.1	1.648	0.279005	0.382984	0.686253
AT5G07780.1	2.043	0.218981	0.390816	0.78094
AT1G12020.1	2.28	0.192735	0.380186	0.812162
AT2G27210.1	2.181	0.234877	0.377504	0.743724
AT2G13370.1	2.057	0.267031	0.372449	0.690463
AT2G47070.1	2.025	0.264209	0.386043	0.708753
AT2G27210.2	2.22	0.22102	0.374799	0.762717
AT2G30930.1	1.799	0.335554	0.37253	0.593764
AT5G57480.1	2.212	0.260833	0.376957	0.702045
AT1G23950.4	1.851	0.291311	0.371434	0.653029
AT5G65460.1	2.079	0.241714	0.378518	0.734781
AT5G14970.1	1.742	0.231749	0.378478	0.75151
AT2G41160.1	1.887	0.253467	0.376072	0.714017
AT5G15810.1	2.037	0.264399	0.385903	0.707213
AT1G01670.1	1.998	0.222023	0.397255	0.780996
AT1G21200.1	1.589	0.253141	0.364931	0.705623
AT2G27950.1	1.888	0.297479	0.372559	0.646337
AT5G45700.1	1.779	0.248885	0.373889	0.721751
AT5G01390.2	1.81	0.221317	0.378163	0.765806
AT2G36620.1	1.443	0.362039	0.349966	0.534042
AT1G47840.1	2.043	0.303814	0.357811	0.615513
AT3G06350.1	1.747	0.271424	0.362956	0.674984
AT2G35620.1	1.937	0.221268	0.374283	0.762682
AT3G13310.1	1.62	0.264034	0.3708	0.694497
AT2G28840.1	1.952	0.313894	0.350524	0.594877
AT1G18590.1	1.497	0.251311	0.370639	0.714767
AT2G28840.2	1.581	0.305867	0.352086	0.610049
AT5G08139.1	1.919	0.270069	0.371934	0.683588
AT1G70570.1	1.866	0.292069	0.369397	0.650119
AT4G35800.1	1.741	0.285526	0.366457	0.655364
AT2G27970.1	1.53	0.252529	0.368923	0.706365
AT1G50700.1	2.002	0.250572	0.375357	0.715008
AT1G30730.1	1.645	0.299222	0.364325	0.634448
AT5G41520.1	1.567	0.369554	0.354305	0.52644
AT5G53290.1	1.722	0.224301	0.37612	0.758182
AT3G63450.3	2.264	0.227065	0.38159	0.753755
AT4G39220.1	1.712	0.273941	0.358753	0.665684
AT4G25280.1	2.034	0.246646	0.387744	0.734336
AT4G22690.1	2.116	0.235217	0.373147	0.740982
AT3G17800.2	1.993	0.262362	0.379911	0.706378
AT4G24090.1	1.414	0.233467	0.364087	0.735319
AT1G65510.1	2.101	0.281834	0.386904	0.677824
AT3G17800.1	1.982	0.270488	0.379908	0.694037
AT1G77670.1	2.01	0.244913	0.377941	0.729698
AT3G55990.1	2.102	0.260814	0.377388	0.703917
AT3G47680.1	2.064	0.258002	0.372729	0.704951
AT2G01570.1	2.049	0.28178	0.376177	0.672241
AT2G45960.2	1.803	0.338643	0.361005	0.56982
AT3G20080.1	1.745	0.236976	0.375987	0.738615
AT3G49730.1	1.54	0.264944	0.362477	0.681209
AT3G20080.3	1.825	0.236777	0.378227	0.743353
AT2G45960.1	1.724	0.366128	0.353086	0.524966
AT4G15000.1	1.592	0.392247	0.344632	0.489722
AT1G09010.1	1.95	0.272583	0.372302	0.683145
AT3G06740.1	1.397	0.260486	0.358651	0.689554
AT5G05860.1	2.234	0.233514	0.386063	0.753385
AT3G15260.2	1.601	0.283043	0.369254	0.664776
AT2G46680.2	2.162	0.298539	0.370164	0.636512
AT4G32780.1	1.825	0.285059	0.365153	0.655897
AT3G43980.1	1.294	0.287438	0.352649	0.641075
AT1G71692.1	1.588	0.251504	0.364093	0.706797
AT3G60410.3	1.816	0.227247	0.374688	0.754565
AT2G19680.2	1.622	0.277512	0.367505	0.667179
AT2G17840.1	2.522	0.286311	0.382443	0.664744
AT2G01640.1	1.85	0.288896	0.376717	0.65867
AT1G73440.1	1.586	0.217734	0.363841	0.760132
AT5G07440.1	1.75	0.324664	0.357099	0.585778
AT4G14040.1	2.102	0.228202	0.414695	0.780971
AT5G07440.3	1.677	0.286239	0.365103	0.653988
AT5G07440.2	1.734	0.328769	0.356081	0.578873
AT5G51380.1	1.869	0.209554	0.372969	0.779482
AT5G48940.1	2.451	0.201848	0.387015	0.799611
AT3G09570.1	1.786	0.238907	0.372305	0.733542
AT5G63880.2	1.59	0.275967	0.36664	0.670499
AT1G68300.1	1.57	0.305734	0.375755	0.641734
AT1G70520.1	2.192	0.253373	0.374078	0.712309
AT5G64070.1	2.113	0.270372	0.365308	0.67672
AT1G04240.1	2.009	0.276996	0.373491	0.676823
AT1G01510.1	1.954	0.280106	0.364361	0.660653
AT4G17085.1	1.984	0.206409	0.391923	0.797375
AT3G08510.3	1.666	0.289947	0.359711	0.643685
AT1G24851.1	1.732	0.234697	0.374961	0.741548
AT2G34560.1	1.491	0.293046	0.356899	0.635206
AT1G03920.1	1.742	0.226253	0.372749	0.752935
AT2G32710.2	1.732	0.238869	0.378143	0.740447
AT2G32710.1	1.776	0.234736	0.37784	0.746015
AT2G06010.1	1.662	0.240067	0.376382	0.733226
AT4G29430.1	1.667	0.301003	0.368648	0.631521
AT4G13860.1	1.773	0.337205	0.360224	0.570919
AT1G24793.1	1.659	0.29929	0.371998	0.644432
AT1G24793.2	1.635	0.292932	0.374588	0.65562
AT5G44450.1	1.702	0.262241	0.375915	0.70247
AT3G58610.3	1.513	0.333064	0.356612	0.580434
AT2G32730.1	1.835	0.309202	0.367831	0.622977
AT1G11360.2	1.593	0.263247	0.362331	0.68779
AT4G23570.2	2.231	0.251857	0.378135	0.71578
AT4G23570.3	2.239	0.24739	0.375995	0.719629
AT2G31810.2	1.617	0.312205	0.364218	0.616982
AT4G23570.1	2.237	0.246801	0.376906	0.722275
AT5G17020.2	1.984	0.265478	0.377994	0.699017
AT2G04850.1	2.127	0.211598	0.400612	0.798004
AT5G17020.1	2.009	0.270965	0.380261	0.69276
AT5G57880.1	2.064	0.159206	0.385637	0.867409
AT4G26270.1	2.022	0.219633	0.374755	0.766185
AT4G15450.1	1.964	0.251438	0.377696	0.717209
AT3G20640.1	1.789	0.227959	0.368997	0.747908
AT3G07360.2	1.842	0.281821	0.372985	0.670017
AT3G07360.3	1.822	0.283442	0.371055	0.665377
AT3G07360.1	1.832	0.290676	0.371784	0.655303
AT3G21200.1	1.737	0.214255	0.368572	0.769092
AT1G67325.2	1.884	0.240473	0.389084	0.747936
AT1G67325.1	1.734	0.286884	0.388534	0.67838
AT1G78240.2	1.844	0.241719	0.370133	0.725468
AT5G49760.1	2.108	0.235945	0.384511	0.748007
AT4G25360.1	1.829	0.254913	0.373372	0.70846
AT4G25360.2	1.838	0.246441	0.372256	0.720757
AT5G03530.1	1.751	0.268757	0.373802	0.691536
AT1G71860.3	1.529	0.273353	0.36302	0.671776
AT1G71860.1	1.529	0.284845	0.365671	0.658116
AT3G44720.1	2.093	0.277039	0.384785	0.688125
AT4G00300.2	1.658	0.236123	0.371031	0.738706
AT4G00300.1	1.998	0.15373	0.367595	0.865871
AT3G47000.1	1.601	0.289413	0.372638	0.658716
AT3G63190.1	1.604	0.249606	0.374768	0.718805
AT2G46690.1	1.872	0.269282	0.366146	0.676988
AT2G39990.1	1.538	0.27725	0.361949	0.663845
AT5G57090.1	1.74	0.299874	0.371025	0.641521
AT3G54670.3	1.817	0.292258	0.362588	0.642827
AT1G63460.1	1.43	0.262894	0.37289	0.700344
AT1G10820.2	2.165	0.242023	0.382729	0.738204
AT1G10820.1	2.161	0.240464	0.381466	0.739101
AT3G01930.2	1.721	0.247843	0.379439	0.725598
AT1G51060.1	1.676	0.289	0.35585	0.635044
AT2G29995.1	1.714	0.261831	0.377028	0.700571
AT4G32260.1	1.849	0.208932	0.366396	0.774554
AT1G59900.1	1.829	0.332149	0.372349	0.598494
AT1G06780.1	1.885	0.265705	0.373502	0.693479
AT5G47890.1	1.56	0.350035	0.349964	0.541211
AT1G63980.2	1.542	0.3282	0.358661	0.588416
AT2G34357.1	2.721	0.248364	0.381331	0.723838
AT3G01090.3	1.97	0.270556	0.377316	0.690705
AT4G32720.1	1.611	0.321978	0.355303	0.591235
AT4G23820.1	1.892	0.239127	0.389574	0.748558
AT2G47980.1	1.989	0.274083	0.371474	0.678998
AT4G32720.2	1.635	0.310886	0.358268	0.610624
AT3G52450.1	1.862	0.219619	0.371432	0.763843
AT3G56990.1	1.696	0.283503	0.365733	0.659887
AT5G62200.1	1.856	0.257383	0.386123	0.718409
AT4G01560.1	1.643	0.28296	0.372403	0.669211
AT3G20830.1	1.957	0.229671	0.386546	0.756359
AT3G57870.1	1.97	0.327829	0.371	0.600392
AT5G25780.1	2.152	0.294801	0.367352	0.639481
AT5G64460.2	1.752	0.280573	0.369673	0.667476
AT1G54060.1	1.655	0.267732	0.372295	0.690894
AT4G00720.1	1.609	0.289486	0.362717	0.646513
AT3G62010.1	1.924	0.265036	0.374747	0.695761
AT1G62880.1	1.531	0.223915	0.369279	0.755732
AT1G56045.1	1.679	0.313243	0.368595	0.619405
AT3G12010.1	2.127	0.240055	0.385269	0.742405
AT2G05220.2	1.58	0.322775	0.345343	0.572448
AT5G15870.1	1.865	0.260756	0.375454	0.702631
AT4G26710.2	1.618	0.281876	0.368149	0.6614
AT5G55160.1	1.572	0.305147	0.357596	0.6166
AT5G55160.2	1.63	0.272186	0.364976	0.674889
AT4G01540.2	1.845	0.228227	0.374819	0.752596
AT4G01540.1	1.818	0.240201	0.377325	0.736624
AT2G02930.1	1.942	0.220889	0.376259	0.765656
AT5G55140.1	1.655	0.275778	0.375734	0.680591
AT4G27230.1	1.794	0.322579	0.374368	0.614611
AT4G27230.2	1.936	0.292201	0.378802	0.66158
AT1G79820.4	2.125	0.20512	0.37907	0.790188
AT5G66280.1	1.719	0.273463	0.374928	0.682971
AT1G79820.3	2.105	0.214651	0.379816	0.776779
AT1G79820.1	2.098	0.22136	0.380558	0.766237
AT1G64142.1	1.677	0.289304	0.362513	0.646394
AT4G34370.2	2.369	0.255514	0.388332	0.721047
AT1G51980.2	1.488	0.304437	0.355403	0.617474
AT3G05560.3	1.606	0.281351	0.366512	0.665603
AT5G18230.2	1.71	0.301905	0.369216	0.636994
AT5G18230.1	1.729	0.306297	0.370818	0.632631
AT1G55690.3	1.964	0.233007	0.380904	0.75075
AT1G55690.2	1.882	0.246775	0.38166	0.730892
AT5G46315.1	7	0.218572	1.15009	0.967665
AT5G53340.2	1.873	0.283966	0.370889	0.664835
AT4G13200.1	1.774	0.262983	0.383063	0.7081
AT5G13500.1	1.815	0.243402	0.382748	0.735734
AT1G26880.1	1.833	0.336679	0.365442	0.585727
AT5G13500.3	1.794	0.247212	0.381239	0.728356
AT5G13500.2	1.815	0.244117	0.382293	0.734003
AT3G56480.1	1.574	0.296402	0.369626	0.645864
AT1G78630.1	1.925	0.228963	0.381922	0.760168
AT1G65845.1	1.871	0.30849	0.363041	0.617008
AT5G21170.1	1.747	0.314075	0.36672	0.615414
AT5G53800.1	1.482	0.358589	0.348933	0.536723
AT4G00740.1	1.674	0.278321	0.372206	0.673325
AT4G30160.1	1.755	0.269492	0.368433	0.682104
AT2G44530.2	1.67	0.283978	0.375429	0.668819
AT2G44530.1	1.671	0.285695	0.37612	0.667199
AT5G40670.1	2.003	0.258221	0.38234	0.713396
AT4G33200.1	1.929	0.21679	0.370721	0.766314
AT4G33200.3	1.786	0.212596	0.369867	0.772123
AT4G33200.2	1.93	0.214473	0.370292	0.769805
AT1G05850.1	1.806	0.35069	0.353299	0.549609
AT3G47670.1	1.619	0.245031	0.372409	0.726778
AT5G53340.1	1.898	0.290753	0.372324	0.655688
AT2G20630.2	1.81	0.286079	0.368391	0.657166
AT5G28330.1	2.194	0.174638	0.394217	0.849229
AT1G72200.1	1.806	0.2244	0.382383	0.76646
AT2G20630.1	1.695	0.330153	0.355906	0.578547
AT2G24400.1	2.006	0.253205	0.382216	0.71766
AT2G21160.2	1.485	0.319759	0.358576	0.597703
AT2G25520.1	1.688	0.271633	0.362639	0.672533
AT1G32240.1	1.978	0.217157	0.382304	0.776445
AT5G04740.2	2.062	0.273704	0.379112	0.685568
AT5G04740.1	1.777	0.296973	0.365025	0.637465
AT3G06580.1	1.53	0.283027	0.362555	0.657829
AT3G63470.1	2.503	0.226536	0.372146	0.749623
AT1G21770.1	1.365	0.229311	0.356386	0.735989
AT1G31070.1	1.989	0.272295	0.366858	0.678764
AT1G31070.2	1.914	0.319467	0.362132	0.604851
AT1G05620.1	1.535	0.263872	0.379418	0.703452
AT5G61020.2	1.685	0.347409	0.356585	0.559536
AT4G33780.1	1.705	0.264571	0.37228	0.697381
AT3G57480.1	1.797	0.230328	0.376685	0.750773
AT1G77810.1	1.778	0.24279	0.373877	0.728466
AT3G11710.1	1.744	0.341801	0.358327	0.569025
AT1G77810.2	1.735	0.262066	0.374267	0.699366
AT5G07360.1	1.889	0.225133	0.371504	0.754757
AT5G07360.2	1.919	0.214387	0.366845	0.76679
AT3G50550.1	1.735	0.272349	0.375489	0.68579
AT3G11770.1	1.428	0.23191	0.366497	0.73817
AT1G64650.2	1.635	0.257103	0.367752	0.703353
AT1G31050.1	1.736	0.296971	0.376478	0.652214
AT3G03870.2	1.944	0.217285	0.373653	0.768361
AT3G03870.1	1.944	0.220017	0.375699	0.765884
AT5G66140.1	1.674	0.268071	0.365997	0.685063
AT2G17230.1	1.7	0.243593	0.37064	0.725548
AT1G22220.1	1.941	0.242143	0.379913	0.736272
AT3G53668.1	1.549	0.257287	0.362503	0.698035
AT4G21090.3	1.683	0.212418	0.365706	0.771404
AT4G21090.2	1.683	0.214847	0.365214	0.766664
AT4G21090.1	1.683	0.21631	0.366664	0.765949
AT4G27840.1	2.043	0.226619	0.378988	0.757664
AT2G28940.1	1.69	0.241982	0.37734	0.732738
AT2G28940.2	1.686	0.245178	0.378057	0.728141
AT3G53740.3	1.575	0.404023	0.357685	0.496047
AT5G64460.8	1.761	0.268359	0.36928	0.685737
AT5G44920.1	1.665	0.240187	0.362651	0.72082
AT5G35590.1	1.459	0.336912	0.36022	0.580206
AT4G11010.1	1.482	0.347377	0.353551	0.553611
AT3G54690.1	2.168	0.218147	0.384031	0.774779
AT5G23590.1	1.869	0.299302	0.376632	0.649419
AT5G18270.1	2.027	0.243315	0.366729	0.722195
AT5G48760.1	1.561	0.316485	0.363485	0.611334
AT3G04020.1	1.689	0.259941	0.371502	0.699385
AT5G48760.2	1.566	0.312325	0.363563	0.617176
AT1G43710.1	1.54	0.314444	0.352713	0.600967
AT4G31010.1	1.893	0.242773	0.384703	0.737946
AT2G44525.1	1.7	0.256964	0.380121	0.709764
AT1G79570.1	2.036	0.238899	0.378942	0.739195
AT3G53740.2	1.542	0.391291	0.355982	0.508208
AT3G51640.2	1.832	0.261432	0.382058	0.708431
AT5G47180.1	2.008	0.28169	0.376666	0.672628
AT5G47180.2	2.003	0.299498	0.377736	0.64654
AT3G51640.1	1.847	0.273412	0.378434	0.687207
AT5G50580.1	1.472	0.270202	0.370188	0.685343
AT5G50580.2	1.463	0.275841	0.371966	0.679746
AT4G08380.1	1.452	0.332464	0.366666	0.593492
AT5G38895.1	2.864	0.213989	0.412913	0.800086
AT3G61130.1	2.009	0.278834	0.372984	0.672074
AT5G20840.1	2.12	0.239117	0.384446	0.745238
AT3G59690.1	1.678	0.281859	0.360693	0.653896
AT1G30330.1	1.997	0.238586	0.377198	0.738803
AT3G47480.1	1.751	0.224011	0.369441	0.753738
AT3G50550.2	1.827	0.242801	0.380943	0.735931
AT5G35980.1	1.713	0.234063	0.372735	0.741963
AT5G13560.1	1.978	0.259659	0.374997	0.706213
AT1G20020.3	2.036	0.181292	0.397068	0.841213
AT5G05360.2	1.794	0.225218	0.369102	0.753255
AT3G23210.1	2.099	0.220365	0.39115	0.772278
AT5G05360.1	1.687	0.255531	0.365567	0.702385
AT5G10980.1	2	0.325958	0.372594	0.603141
AT4G28100.1	1.854	0.240837	0.376623	0.734967
AT2G23290.1	1.616	0.283096	0.363854	0.660307
AT1G22640.1	1.723	0.253504	0.36793	0.70933
AT3G44340.1	1.776	0.267193	0.368691	0.68632
AT3G44340.2	1.818	0.260205	0.372246	0.7005
AT2G29530.2	1.361	0.335194	0.360317	0.582066
AT5G06450.1	2.096	0.226393	0.387391	0.763272
AT4G08980.3	1.814	0.265838	0.372886	0.693036
AT4G30190.1	1.736	0.361556	0.351939	0.535538
AT4G30190.2	1.753	0.354415	0.353824	0.546868
AT2G20230.1	1.489	0.231646	0.354892	0.730366
AT3G13480.1	1.446	0.283311	0.362948	0.657936
AT2G32520.1	2.031	0.303002	0.370333	0.632091
AT2G36160.1	1.678	0.383356	0.355734	0.512955
AT5G19450.1	1.737	0.310707	0.365056	0.618306
AT2G38650.2	2.175	0.283955	0.374113	0.665724
AT5G46730.1	1.616	0.336994	0.36651	0.586141
AT5G46730.2	1.575	0.326211	0.370578	0.607031
AT3G09070.1	1.93	0.308616	0.367016	0.625341
AT5G25560.4	1.959	0.253433	0.384914	0.721429
AT2G42740.1	1.264	0.274997	0.366454	0.675165
AT5G25560.2	1.68	0.247986	0.367691	0.713616
AT3G54810.1	1.929	0.264999	0.377147	0.699339
AT3G54810.2	1.852	0.288728	0.373104	0.659592
AT5G25560.1	1.673	0.248307	0.368269	0.713684
AT3G22630.1	1.808	0.27004	0.379389	0.692963
AT2G36400.1	1.84	0.248467	0.376494	0.722141
AT2G28350.1	2.194	0.18851	0.381721	0.819146
AT5G14105.1	1.494	0.262388	0.361388	0.688368
AT5G09250.2	1.593	0.219895	0.366932	0.760696
AT2G37440.2	1.906	0.185487	0.379314	0.823001
AT1G18840.1	1.732	0.261863	0.373191	0.701531
AT1G20950.1	1.791	0.335847	0.363402	0.583831
AT1G18840.2	1.728	0.26312	0.373035	0.699439
AT1G78660.3	1.593	0.288403	0.36289	0.649828
AT1G78660.2	1.578	0.297099	0.363754	0.638449
AT1G78660.1	1.579	0.299289	0.362315	0.633197
AT1G56700.1	1.697	0.253871	0.363719	0.701332
AT1G56700.2	1.638	0.244516	0.361587	0.71515
AT1G56700.3	1.694	0.236327	0.361357	0.72771
AT2G36420.1	1.837	0.343406	0.36311	0.56642
AT3G22310.1	1.532	0.308098	0.360739	0.619994
AT3G52920.1	1.547	0.350828	0.357103	0.555198
AT1G62570.1	1.684	0.288932	0.3713	0.655935
AT1G74740.1	1.721	0.263322	0.372613	0.697409
AT2G36890.1	1.642	0.274679	0.361969	0.664602
AT4G11211.1	2.039	0.17414	0.385308	0.842694
AT5G50340.1	1.915	0.22166	0.375071	0.762248
AT4G02820.1	2.24	0.239747	0.393235	0.749262
AT4G21902.1	2.01	0.209576	0.385315	0.789456
AT1G08880.1	1.971	0.33661	0.373787	0.589055
AT1G76780.1	1.456	0.334052	0.367232	0.592263
AT1G10900.1	1.692	0.255683	0.363722	0.699236
AT4G22190.1	1.987	0.230502	0.378859	0.753295
AT3G06700.2	1.579	0.391029	0.365544	0.519097
AT4G14410.2	2.099	0.284513	0.361268	0.643462
AT4G14410.1	2.209	0.247451	0.366989	0.709262
AT5G55300.1	1.938	0.309449	0.364011	0.618131
AT5G66985.1	1.33	0.232031	0.362522	0.737604
AT5G55300.3	2.022	0.296649	0.368172	0.640561
AT5G55300.2	1.961	0.302238	0.365426	0.629677
AT4G12880.2	1.859	0.299496	0.385905	0.657982
AT4G33865.1	1.66	0.365213	0.36637	0.551661
AT4G12880.1	1.405	0.32884	0.35402	0.582298
AT3G63170.1	1.905	0.21808	0.372946	0.765969
AT5G56150.2	1.447	0.30014	0.359366	0.628497
AT5G61530.1	1.58	0.295431	0.363682	0.640527
AT5G42940.1	2.06	0.233477	0.377191	0.744573
AT1G15130.1	1.953	0.296012	0.370186	0.644772
AT2G42400.1	1.639	0.242949	0.377765	0.731504
AT4G11410.1	1.681	0.23818	0.37963	0.742018
AT1G59730.1	1.528	0.249808	0.360928	0.703353
AT5G58440.1	1.75	0.297415	0.364569	0.636578
AT3G27560.1	2.279	0.232899	0.384915	0.750122
AT4G13020.4	2.041	0.241071	0.368482	0.723758
AT1G25380.1	1.622	0.27255	0.369449	0.67901
AT5G28450.1	2.414	0.143989	0.385	0.887027
AT5G42950.1	1.891	0.262128	0.373395	0.699351
AT4G13310.2	1.709	0.289366	0.369579	0.656636
AT2G04030.2	1.589	0.283095	0.364202	0.658232
AT2G04030.1	1.567	0.286934	0.363947	0.652534
AT2G40950.1	1.875	0.256075	0.383142	0.718127
AT2G05440.4	1.388	0.373674	0.345003	0.513518
AT5G08180.2	1.56	0.272481	0.360773	0.674503
AT2G01720.1	1.555	0.306848	0.367513	0.629615
AT3G04120.1	1.898	0.359714	0.371745	0.56611
AT5G42630.1	1.99	0.268681	0.380831	0.694112
AT5G64760.1	1.703	0.249658	0.376127	0.719863
AT5G42630.2	1.961	0.233338	0.376045	0.74707
AT3G48070.2	1.695	0.218	0.360171	0.757626
AT3G48070.1	1.75	0.220575	0.363867	0.756679
AT1G79520.2	2.504	0.21501	0.396327	0.787602
AT1G79520.1	2.464	0.223401	0.396612	0.77414
AT5G25580.1	2.161	0.245958	0.390728	0.738214
AT1G11400.2	2.04	0.316165	0.373684	0.618471
AT2G39725.2	1.527	0.208201	0.375123	0.786148
AT2G39725.1	1.559	0.189589	0.361276	0.803645
AT1G11400.1	2.034	0.310523	0.374615	0.627181
AT5G17710.1	1.568	0.270034	0.359227	0.672117
AT5G17710.2	1.559	0.277369	0.355569	0.655784
AT3G48090.1	2.054	0.281372	0.374377	0.67059
AT3G48090.2	2.06	0.272857	0.374272	0.682996
AT4G26860.2	1.702	0.234736	0.375029	0.744574
AT5G57685.1	1.702	0.392441	0.364957	0.518239
AT4G10320.1	1.7	0.294139	0.368808	0.64902
AT5G19630.1	1.561	0.241445	0.376292	0.735991
AT5G17770.1	1.673	0.317247	0.365909	0.611623
AT5G44380.1	1.966	0.34517	0.367614	0.570034
AT1G20100.2	1.676	0.250961	0.377394	0.723281
AT5G54970.1	1.698	0.216221	0.370642	0.769396
AT5G61530.2	1.599	0.284162	0.362441	0.655192
AT5G01870.1	1.563	0.28508	0.369941	0.662747
AT3G20230.1	1.632	0.217087	0.375425	0.771165
AT1G53040.1	2.127	0.237836	0.377469	0.739961
AT3G56190.2	1.812	0.324195	0.363896	0.600385
AT3G61610.1	2.045	0.220691	0.377375	0.764908
AT5G45428.1	2.35	0.274326	0.380962	0.687517
AT2G18280.1	1.753	0.29016	0.373616	0.657913
AT2G18280.2	1.775	0.282414	0.373612	0.669015
AT2G40070.2	1.902	0.274702	0.366271	0.672622
AT2G44270.1	1.687	0.273277	0.369883	0.678901
AT5G03200.1	1.837	0.280226	0.376141	0.676179
AT2G40070.1	1.961	0.265965	0.369028	0.688622
AT5G58930.1	1.49	0.262869	0.364986	0.692162
AT3G02350.1	1.654	0.285653	0.375787	0.66737
AT2G03690.1	1.757	0.256488	0.377968	0.71356
AT4G18280.1	1.599	0.283532	0.36991	0.664271
AT3G12260.1	1.525	0.266347	0.357622	0.674425
AT2G44210.1	1.615	0.217686	0.369652	0.765704
AT3G03130.1	1.546	0.264354	0.362627	0.684723
AT1G70600.1	1.457	0.393885	0.367109	0.520483
AT2G37970.1	1.614	0.199413	0.362752	0.791337
AT3G16390.1	1.853	0.211897	0.375533	0.778577
AT4G39910.1	1.592	0.261668	0.370736	0.696792
AT1G04985.1	1.527	0.296872	0.356966	0.627725
AT1G23330.1	1.823	0.23516	0.378051	0.744421
AT3G63110.1	1.704	0.23655	0.37603	0.741319
AT2G43090.2	1.725	0.27118	0.372823	0.684683
AT5G43310.1	2.078	0.261067	0.378536	0.703751
AT5G43310.3	2.055	0.267929	0.378263	0.693346
AT5G43310.2	2.068	0.268578	0.377535	0.690965
AT1G22500.1	2.138	0.268556	0.376676	0.689959
AT5G43310.4	2.088	0.261874	0.379189	0.7033
AT5G20910.1	1.843	0.24088	0.377441	0.73667
AT3G19520.2	1.693	0.268474	0.371482	0.685863
AT3G13845.1	1.598	0.294571	0.362899	0.638425
AT1G56423.1	1.514	0.25184	0.369457	0.71303
AT4G16120.1	1.826	0.229834	0.376421	0.749186
AT1G14960.1	1.698	0.216087	0.364676	0.762809
[truncated: 14,336 more rows]

## Sheet: R5
R5 Shoot Control 5’UTR Derived Reactivity Statistics
transcript	ABC_GHI_ln_nrm_fiveprime_max	ABC_GHI_ln_nrm_fiveprime_average	ABC_GHI_ln_nrm_fiveprime_std	ABC_GHI_ln_nrm_fiveprime_gini
AT3G44680.1	0.801	0.0515333	0.169326	0.919592
AT2G14880.1	0.997	0.140127	0.249887	0.778189
AT3G62560.1	1.052	0.156656	0.287623	0.791442
AT1G62780.1	1.352	0.455219	0.42655	0.523549
AT2G12280.1	1.201	0.159652	0.322124	0.819219
AT1G68050.1	0.671	0.120882	0.219913	0.791584
AT2G22190.1	0.971	0.0917429	0.235769	0.87864
AT5G62000.3	1.437	0.38098	0.382967	0.554226
AT1G08650.2	1.489	0.348921	0.429875	0.641199
AT3G11130.1	1.012	0.170846	0.26175	0.722392
AT3G09860.1	1.177	0.14913	0.254071	0.746818
AT1G04440.1	1.355	0.166329	0.309614	0.7931
AT5G13090.1	1.067	0.119423	0.275629	0.857226
AT4G30810.1	0.973	0.116	0.282963	0.866499
AT4G32560.1	NA	NA	NA	NA
AT5G59380.1	0.6	0.0780333	0.163556	0.826698
AT3G60530.1	1.434	0.144297	0.274056	0.787651
AT2G41600.4	1.237	0.243889	0.382953	0.73632
AT1G31730.1	1.684	0.26534	0.405205	0.726632
AT2G41600.2	1.249	0.246167	0.386649	0.73644
AT2G41600.3	1.166	0.229778	0.360881	0.736407
AT5G19540.1	1.301	0.380323	0.422246	0.597975
AT1G11750.1	1.524	0.2778	0.37937	0.67901
AT3G11500.1	1.326	0.345103	0.390147	0.604497
AT5G52780.1	0.339	0.0236111	0.0789804	0.921961
AT5G50020.2	0	0	0	NA
AT1G72370.2	0.969	0.318558	0.314879	0.549311
AT1G72370.1	0.961	0.316977	0.312395	0.548015
AT1G18490.1	0.921	0.0332286	0.133679	0.945329
AT5G19550.1	0.692	0.0495152	0.139051	0.89329
AT3G19930.1	1.54	0.274121	0.385342	0.693187
AT4G23740.1	0.725	0.0625494	0.164534	0.876574
AT1G67750.1	0.601	0.0567358	0.175661	0.905585
AT3G23900.1	0.98	0.0913095	0.198437	0.833073
AT1G73940.1	1.331	0.230095	0.358926	0.737745
AT5G47540.1	1.883	0.216178	0.371379	0.769456
AT2G02370.2	1.058	0.0433252	0.171795	0.943385
AT2G02370.1	1.332	0.0836364	0.246645	0.90242
AT1G55530.1	1.574	0.211541	0.378913	0.785411
AT2G43210.1	0.402	0.0118235	0.067921	0.970588
AT1G52720.1	1.069	0.152552	0.284371	0.797036
AT3G09720.1	0.512	0.0284444	0.117279	0.944444
AT1G56000.1	NA	NA	NA	NA
AT5G22070.1	1.509	0.122669	0.300109	0.868413
AT1G17080.1	1.297	0.264308	0.372656	0.698208
AT1G74670.1	1.446	0.262579	0.352925	0.667021
AT3G59940.1	1.004	0.193278	0.305089	0.74043
AT5G61412.1	1.092	0.340097	0.354711	0.563866
AT5G58710.1	2.018	0.230389	0.441168	0.796205
AT1G24490.2	1.751	0.291225	0.407178	0.691381
AT5G08120.1	0.965	0.110015	0.231275	0.832884
AT3G49670.1	1.323	0.109923	0.26952	0.869383
AT3G51470.1	0.46	0.0541176	0.148207	0.882353
AT4G24760.1	0.877	0.0850431	0.206335	0.864824
AT1G22360.1	1.325	0.351	0.439958	0.65179
AT1G22360.2	1.341	0.352077	0.444863	0.655309
AT4G37190.1	1.494	0.253111	0.410369	0.748483
AT5G22050.2	1.17	0.214128	0.327789	0.731682
AT5G22050.1	1.185	0.278359	0.35061	0.653945
AT4G37190.2	1.089	0.202	0.315146	0.731338
AT3G54130.1	1.9	0.200796	0.405093	0.816841
AT5G49460.1	0.753	0.0502696	0.158087	0.911875
AT3G47965.1	1.794	0.369573	0.458429	0.64443
AT3G13120.1	1.423	0.308474	0.354167	0.603791
AT2G26190.1	0.729	0.101043	0.195586	0.80392
AT4G32330.3	1.374	0.216108	0.393069	0.790071
AT1G74920.2	1.401	0.249021	0.376818	0.724282
AT4G32330.1	1.374	0.291034	0.357569	0.639443
AT4G24275.1	1.488	0.28061	0.391295	0.689054
AT1G75800.1	1.288	0.228429	0.337703	0.712723
AT1G71760.1	0.855	0.0806818	0.20765	0.873752
AT4G14230.1	0.948	0.219388	0.303621	0.690688
AT3G26115.1	0	0	0	NA
AT2G03680.1	1.65	0.347659	0.367673	0.557855
AT1G44780.1	0.691	0.12805	0.19582	0.714467
AT2G20020.1	1.317	0.281561	0.378902	0.680544
AT3G01180.1	0.702	0.0670986	0.181397	0.887022
AT5G15700.2	0.953	0.035451	0.148857	0.94989
AT1G33060.2	NA	NA	NA	NA
AT2G18050.1	0.705	0.179452	0.215944	0.626292
AT2G22540.2	1.774	0.196747	0.35187	0.780811
AT2G18050.2	1.19	0.304723	0.400582	0.672255
AT1G75750.1	1.245	0.267714	0.342894	0.649766
AT1G75750.2	1.249	0.163741	0.303274	0.794694
AT3G22150.1	1.081	0.0695	0.20723	0.906207
AT2G01590.1	0.929	0.0899615	0.224233	0.871395
AT5G21990.1	1.2	0.201781	0.307392	0.718354
AT1G66660.2	1.483	0.3159	0.488747	0.734457
AT1G14740.1	1.243	0.261294	0.306015	0.587447
AT5G42150.1	1.176	0.21353	0.31673	0.715368
AT2G34200.1	2.039	0.409616	0.431214	0.560662
AT2G33120.2	1.248	0.253918	0.356298	0.696503
AT2G33120.3	1.66	0.371597	0.442267	0.628688
AT2G33120.1	1.233	0.256092	0.353558	0.690415
AT3G53270.3	1.175	0.115378	0.260527	0.844754
AT1G54210.1	1.147	0.3073	0.358102	0.597787
AT1G54210.2	1.12	0.1838	0.312644	0.759001
AT5G41970.1	NA	NA	NA	NA
AT4G22240.1	1.227	0.154386	0.300785	0.807619
AT4G17560.1	1.008	0.152138	0.255512	0.759449
AT1G18150.2	0.439	0.0283226	0.107849	0.935484
AT5G59000.1	1.235	0.0421345	0.163605	0.940173
AT3G22970.2	1.561	0.204841	0.330209	0.742161
AT5G58510.1	0.498	0.031619	0.121435	0.936508
AT1G06850.2	1.828	0.188474	0.396696	0.831255
AT2G03550.1	1.085	0.324269	0.398062	0.639166
AT5G66250.3	0.925	0.183565	0.297242	0.742753
AT5G65960.1	0.793	0.126889	0.232557	0.789475
AT2G35840.3	0.734	0.0611667	0.155945	0.869792
AT2G35840.2	0.679	0.0565208	0.144137	0.869832
AT2G35840.1	0.67	0.0957143	0.183279	0.793651
AT2G33810.1	0.733	0.0246048	0.102506	0.950748
AT5G36290.1	1.454	0.165533	0.335727	0.82114
AT5G36290.2	1.414	0.243369	0.379246	0.737882
AT4G30260.1	1.083	0.222025	0.334091	0.722942
AT4G16180.2	0.758	0.047566	0.153414	0.919207
AT4G16180.1	0.953	0.0603077	0.194582	0.918968
AT4G38740.1	1.369	0.332743	0.362006	0.586411
AT3G20410.1	1.011	0.147356	0.277907	0.802304
AT5G66250.4	1.237	0.153656	0.291514	0.795685
AT5G37510.1	1.358	0.262891	0.360377	0.686448
AT5G37510.2	1.348	0.260891	0.357839	0.686687
AT1G51110.1	1.063	0.113152	0.276476	0.871241
AT5G65940.2	1.403	0.438658	0.434968	0.548773
AT5G65940.3	1.363	0.423658	0.422871	0.551733
AT1G17680.1	1.326	0.232147	0.346676	0.719796
AT5G59410.1	1.067	0.163822	0.26401	0.739962
AT3G20780.1	0.737	0.157926	0.251683	0.732055
AT1G21160.1	0.549	0.0482993	0.137578	0.897191
AT5G55960.1	0.675	0.0351196	0.124717	0.928939
AT5G22875.1	1.054	0.159186	0.32021	0.820384
AT1G05150.1	0.886	0.0499298	0.155662	0.910971
AT3G46020.1	0.861	0.0565909	0.183709	0.917798
AT5G04440.1	1.107	0.229909	0.344522	0.724759
AT3G47060.1	NA	NA	NA	NA
AT1G65440.1	0.934	0.2118	0.249495	0.617107
AT3G63500.1	1.231	0.196455	0.304874	0.734013
AT5G04420.2	0.429	0.00809434	0.0583691	0.981132
AT5G04420.3	0.703	0.0213	0.105511	0.963047
AT5G04420.1	0.688	0.0465556	0.140199	0.902826
AT3G63500.2	1.217	0.205828	0.30916	0.717379
AT3G46000.1	1.686	0.152533	0.277191	0.769069
AT1G19310.1	1.173	0.172464	0.316645	0.79189
AT4G31990.3	0.944	0.120917	0.244682	0.823619
AT4G31990.2	0.91	0.115072	0.234691	0.825947
AT4G31990.1	0.755	0.0413774	0.134726	0.921582
AT5G28770.3	0.891	0.2935	0.320569	0.578365
AT4G32400.1	0.781	0.152114	0.236855	0.730868
AT3G13460.1	1.322	0.151468	0.275799	0.779532
AT3G17120.1	1.885	0.150331	0.332416	0.841777
AT4G01040.1	NA	NA	NA	NA
AT4G24830.1	0.588	0.0514375	0.144354	0.895568
AT3G13460.2	0.616	0.0645091	0.148898	0.852957
AT5G42390.1	0.501	0.115241	0.187889	0.747807
AT1G60260.1	NA	NA	NA	NA
AT1G59840.2	0.66	0.0548182	0.15408	0.896125
AT4G04470.1	0.595	0.0731282	0.166163	0.850847
AT3G07790.1	0.745	0.177111	0.241074	0.672545
AT1G59840.1	0.596	0.0694286	0.175073	0.87331
AT5G43050.1	1.006	0.284432	0.385405	0.677068
AT5G46680.1	0.511	0.0354861	0.1299	0.930556
AT1G17455.2	2.193	0.119214	0.319411	0.882332
AT1G17455.1	2.034	0.223385	0.396547	0.775907
AT3G18960.1	1.096	0.116452	0.25833	0.84635
AT3G48200.1	1.082	0.145074	0.267001	0.789537
AT1G11260.1	1.344	0.526747	0.365255	0.397014
AT1G64750.2	0.78	0.162209	0.235358	0.7067
AT1G64750.3	1.89	0.27328	0.42864	0.728814
AT3G25530.1	1.332	0.353625	0.404902	0.612915
AT1G64750.1	1.664	0.322257	0.402443	0.629458
AT3G01480.1	1.127	0.222228	0.300357	0.683441
AT2G42190.1	1.295	0.291141	0.317972	0.588355
AT3G01480.2	1.157	0.229347	0.308949	0.682127
AT3G09440.1	1.231	0.151654	0.269792	0.775396
AT5G49660.1	0.827	0.103968	0.238197	0.849457
AT2G06050.1	1.254	0.195205	0.283339	0.703417
AT3G09440.2	1.223	0.147906	0.266487	0.77972
AT5G16680.1	1.523	0.416112	0.437585	0.574551
AT2G34300.2	1.168	0.153545	0.293298	0.802591
AT2G34300.1	1.178	0.12787	0.235476	0.779554
AT5G32450.1	0.907	0.12406	0.224971	0.786068
AT1G69840.7	1.261	0.115735	0.259659	0.847599
AT3G25150.1	1.04	0.117778	0.233165	0.812837
AT1G21580.1	0.871	0.185589	0.271403	0.702935
AT2G17670.1	0.748	0.0441633	0.152013	0.926176
AT1G69840.6	1.213	0.186862	0.34391	0.793695
AT1G48650.1	1.11	0.185625	0.297114	0.745253
AT1G48650.2	1.142	0.189182	0.305923	0.748926
AT5G36710.1	1.734	0.461077	0.490562	0.576504
AT2G22450.1	1.035	0.125	0.214734	0.762038
AT5G49510.2	1.587	0.318681	0.425009	0.675475
AT5G51750.1	0.4	0.0984	0.169085	0.753211
AT5G17520.1	1.326	0.189868	0.333455	0.777703
AT2G18960.1	1.29	0.110634	0.259693	0.858625
AT1G16260.2	0.613	0.079	0.181489	0.855581
AT5G02500.1	1.081	0.318074	0.308397	0.537906
AT1G56460.2	1.167	0.186667	0.292269	0.735533
AT1G01770.1	1.475	0.182848	0.332916	0.781265
AT5G25100.1	0.75	0.0937612	0.201468	0.834937
AT5G25100.2	0.763	0.0867473	0.201556	0.856764
AT2G46320.3	1.602	0.200514	0.346601	0.768451
AT3G19360.1	0.489	0.0431471	0.138698	0.911765
AT2G36060.1	1.333	0.200544	0.342192	0.771246
AT2G36060.2	1.347	0.20768	0.349051	0.76597
AT2G36060.3	1.404	0.226184	0.370413	0.756786
AT1G72170.1	1.429	0.200372	0.328906	0.747916
AT3G24530.1	1.436	0.172284	0.299194	0.763748
AT1G07930.1	1.408	0.328371	0.397434	0.6364
AT1G47250.1	1.104	0.491821	0.35879	0.414984
AT1G07930.2	1.437	0.333	0.406055	0.639651
AT4G09030.1	1.398	0.260929	0.406822	0.73163
AT3G19420.1	1.457	0.162817	0.313387	0.806018
AT3G51370.2	1.794	0.182053	0.31328	0.766562
AT3G51370.1	1.174	0.12487	0.239979	0.796746
AT4G08850.2	0	0	0	NA
AT4G08850.1	0	0	0	NA
AT4G32010.1	1.079	0.0954379	0.217537	0.846793
AT1G21630.2	0.631	0.0630118	0.154007	0.860616
AT1G73030.1	0.884	0.165721	0.242462	0.71441
AT1G21630.1	0.621	0.0729549	0.162738	0.837715
AT4G19060.1	0.531	0.0726	0.148404	0.813223
AT3G25840.2	1.803	0.320196	0.364882	0.601438
AT3G25840.1	0.877	0.173797	0.251253	0.705725
AT1G27030.1	1.205	0.183586	0.335487	0.788803
AT2G20950.3	1.157	0.465024	0.382487	0.467321
AT2G20950.2	1.148	0.450929	0.380347	0.478243
AT2G20950.1	1.099	0.430571	0.366084	0.481594
AT3G06450.2	1.287	0.232115	0.336975	0.704238
AT3G25150.2	0	0	0	NA
AT3G02950.1	1.176	0.353364	0.389271	0.596852
AT2G21060.1	0.831	0.224957	0.282823	0.653283
AT5G46920.1	1.002	0.149955	0.293315	0.808413
AT4G15760.1	0.858	0.0517759	0.160864	0.908867
AT1G33700.1	1.177	0.05885	0.256521	0.95
AT1G33700.2	1.177	0.0720233	0.268486	0.93675
AT3G55500.1	1.19	0.163958	0.294998	0.781581
AT1G76160.1	1.051	0.299656	0.323889	0.586855
AT4G19520.1	NA	NA	NA	NA
AT4G11360.1	0.838	0.0974615	0.237392	0.866978
AT4G21190.1	0.743	0.15626	0.233149	0.718462
AT5G62900.1	1.232	0.389214	0.35199	0.50455
AT1G58030.1	1.284	0.246854	0.350741	0.699913
AT2G28450.2	1.556	0.147922	0.31477	0.833271
AT4G19990.2	1.545	0.2659	0.417201	0.737553
AT3G27100.1	1.161	0.4043	0.374154	0.515889
AT3G27100.2	1.226	0.426137	0.396667	0.517969
AT1G51450.1	0.668	0.12775	0.213541	0.755382
AT1G29470.1	1.216	0.183411	0.299088	0.747241
AT1G29470.2	1.202	0.14927	0.335647	0.850908
AT1G19880.1	0.819	0.0917835	0.17991	0.808452
AT1G64500.1	0.889	0.111167	0.264583	0.861069
AT2G01060.1	1.689	0.357287	0.431175	0.627851
AT4G29870.1	NA	NA	NA	NA
AT1G53520.1	1.231	0.239278	0.343942	0.690414
AT5G01390.4	1.979	0.354211	0.491909	0.689845
AT5G01390.3	2.011	0.384386	0.507768	0.66983
AT5G59180.1	1.526	0.3772	0.454029	0.63252
AT1G58684.1	NA	NA	NA	NA
AT5G03905.1	1.639	0.269764	0.36001	0.669515
AT5G15610.2	1.113	0.164704	0.296702	0.784999
AT5G15610.1	1.171	0.17437	0.311801	0.782451
AT1G80950.1	1.005	0.0756765	0.188049	0.863552
AT5G35100.2	0.636	0.098	0.206589	0.829796
AT4G33565.1	0	0	0	NA
AT2G22970.1	0.867	0.137308	0.269393	0.81198
AT1G65320.1	0.955	0.115325	0.240754	0.824835
AT1G13170.1	0.462	0.0101168	0.0676137	0.978102
AT1G13170.2	0.477	0.010295	0.069316	0.978417
AT3G51430.1	1.485	0.305542	0.433872	0.699486
AT1G14010.1	0.884	0.156667	0.259794	0.758056
AT5G42780.1	0.624	0.0381622	0.13213	0.927724
AT1G28580.2	1.66	0.110491	0.257234	0.854515
AT1G28580.1	0.406	0.0495122	0.132855	0.878049
AT2G27140.1	0.819	0.209122	0.265361	0.622642
AT2G24765.2	1.164	0.208302	0.294529	0.691486
AT5G16110.1	0.357	0.00360606	0.0356982	0.989899
AT5G55990.1	1.317	0.246569	0.314053	0.652782
AT3G52220.1	1.529	0.208896	0.314882	0.707338
AT5G45100.2	1.121	0.0894242	0.217541	0.862841
AT4G13200.1	0.475	0.0629167	0.13022	0.826269
AT3G56120.1	0.716	0.0548696	0.160934	0.9004
AT5G44020.1	0.979	0.253048	0.313606	0.645554
AT3G10350.2	1.033	0.332926	0.356297	0.579713
AT1G06360.1	1.434	0.345594	0.390863	0.596265
AT3G53560.1	1.235	0.127125	0.285802	0.841077
AT1G21650.2	0.679	0.0972069	0.195019	0.808455
AT1G21650.3	0.718	0.0766667	0.186059	0.861181
AT1G52980.1	0.724	0.161871	0.233807	0.709626
AT1G30330.1	1.5	0.246123	0.372602	0.725268
AT5G44000.1	1.442	0.163833	0.353058	0.817019
AT1G30330.2	1.5	0.231874	0.368906	0.743787
AT3G10330.1	0.939	0.190234	0.29533	0.732452
AT4G08500.1	1.171	0.12567	0.237439	0.791869
AT4G03260.2	1.44	0.205072	0.358297	0.776604
AT5G67320.1	1.372	0.212	0.357722	0.758246
AT4G31180.1	1.316	0.191991	0.284662	0.707015
AT4G31180.2	1.319	0.150122	0.268311	0.772286
AT4G03200.2	1.281	0.100147	0.23772	0.861884
AT4G03200.1	0.86	0.0886923	0.192178	0.83479
AT1G08880.1	1.36	0.275903	0.32574	0.615491
AT1G09580.1	0.905	0.157659	0.270178	0.764435
AT5G44240.2	0.837	0.097813	0.2329	0.859856
AT3G15160.1	0.507	0.01521	0.0864877	0.97
AT1G74260.1	0.736	0.148534	0.235188	0.738233
AT3G22590.1	1.628	0.384886	0.437159	0.607063
AT1G52500.1	1.334	0.468184	0.47801	0.559631
AT3G25717.1	1.164	0.374094	0.372694	0.551208
AT1G76270.1	0.521	0.0217083	0.10411	0.958333
AT2G46030.1	1.292	0.310596	0.376874	0.634424
AT3G57080.1	1.109	0.269385	0.411814	0.723455
AT2G47110.1	0.915	0.211184	0.276935	0.668644
AT2G47110.2	0.953	0.220105	0.288565	0.668542
AT3G25190.1	0.975	0.350719	0.363908	0.55553
AT5G27150.1	1.342	0.150341	0.287628	0.798125
AT2G45010.1	1.637	0.324585	0.46176	0.702379
AT1G01790.1	1.174	0.314286	0.341837	0.584878
AT5G57120.1	1.202	0.447032	0.383792	0.487006
AT5G20520.1	1.197	0.253217	0.321759	0.649961
AT1G11910.1	0.985	0.167017	0.258431	0.729684
AT4G12310.1	1.023	0.256759	0.35167	0.685246
AT1G27970.2	1.198	0.298681	0.369202	0.64623
AT5G09230.5	0.86	0.138429	0.24806	0.770202
AT4G30020.1	1.223	0.12557	0.261897	0.823564
AT5G20500.1	1.311	0.257774	0.36745	0.695557
AT1G01780.1	1.298	0.0652	0.219813	0.924414
AT5G62050.1	1.669	0.213448	0.373265	0.759559
AT3G60130.1	1.029	0.133207	0.289989	0.843315
AT2G40750.1	0.645	0.0788485	0.173011	0.837037
AT3G60130.3	1.61	0.264	0.404613	0.730529
AT1G09830.1	0.436	0.0809245	0.163779	0.811703
AT3G12120.2	1.444	0.0505556	0.232318	0.957076
AT3G12550.1	0.67	0.0195613	0.100136	0.965495
AT3G19640.1	1.228	0.276308	0.40177	0.710703
AT3G56130.2	1.382	0.20699	0.345572	0.758606
AT3G06480.1	0.953	0.127632	0.260056	0.819664
AT1G32460.1	1.456	0.244845	0.381531	0.738242
AT2G23070.1	1.051	0.196529	0.286926	0.693452
AT5G06265.3	1.429	0.128488	0.281725	0.841096
AT5G02800.1	1.746	0.353565	0.430149	0.632791
AT2G16930.1	0.869	0.0548649	0.170933	0.914339
AT2G16930.2	0.864	0.233414	0.272393	0.616067
AT2G16930.3	0.53	0.0176531	0.0878142	0.963784
AT3G14330.1	NA	NA	NA	NA
AT4G16141.1	1.022	0.204573	0.26129	0.650877
AT5G19930.2	1.097	0.121516	0.281885	0.854392
AT5G42770.1	0.685	0.0683699	0.162541	0.854492
AT5G42770.2	0.716	0.0677922	0.166246	0.862084
AT5G19930.1	1.106	0.195875	0.338645	0.767068
AT2G16950.2	1.068	0.197814	0.324979	0.752219
AT2G16950.1	1.098	0.203419	0.334183	0.752215
AT5G10060.1	0.934	0.109642	0.209973	0.795145
AT3G29160.1	0.881	0.148178	0.262324	0.776814
AT3G29160.2	0.997	0.185258	0.287549	0.73114
AT3G29160.3	0.857	0.262176	0.315083	0.628219
AT1G51270.3	0.689	0.0818286	0.184119	0.841241
AT1G69935.1	0.947	0.12016	0.245394	0.823648
AT5G61770.3	1.381	0.220069	0.375291	0.752656
AT5G61770.2	1.847	0.40638	0.47994	0.617711
AT5G61770.1	1.893	0.41428	0.492732	0.620867
AT2G48121.1	0	0	0	NA
AT1G11680.1	1.215	0.172259	0.311168	0.782688
AT3G01610.1	1.336	0.246694	0.347882	0.69208
AT2G48121.2	1.31	0.216035	0.340815	0.740553
AT3G62650.1	0.79	0.172308	0.240633	0.694265
AT5G64380.1	0.954	0.104692	0.241142	0.854311
AT1G51270.4	0.66	0.0545143	0.155908	0.896676
AT3G45900.1	0.972	0.07716	0.20413	0.883318
AT2G33630.1	0.909	0.1786	0.269253	0.718664
AT4G11100.2	1.538	0.0646383	0.20339	0.902354
AT4G11100.1	1.51	0.2252	0.306784	0.660526
AT5G05730.1	1.084	0.151846	0.262152	0.764131
AT2G37400.1	0.745	0.1245	0.235435	0.798635
AT5G05730.2	1.099	0.139807	0.257303	0.785896
AT1G74920.1	1.295	0.216274	0.330137	0.72848
AT1G29880.1	0.859	0.139615	0.272421	0.81068
AT5G08560.2	0.644	0.0588333	0.151729	0.875604
AT1G54610.1	1.292	0.265667	0.344717	0.661046
AT1G54610.2	1.18	0.122183	0.270868	0.845784
AT1G54610.3	1.174	0.121656	0.269531	0.845638
AT5G23630.1	1.358	0.155406	0.315204	0.819095
AT5G55580.1	0.786	0.0430986	0.16106	0.937586
AT1G25560.1	0.903	0.1729	0.258702	0.720973
AT1G65840.1	1.208	0.148596	0.28046	0.797142
AT1G19740.1	1.103	0.219956	0.282708	0.652253
AT2G38000.1	0.814	0.117362	0.227618	0.808379
AT1G20816.1	0.847	0.16925	0.254854	0.709708
AT5G43760.1	1.353	0.327554	0.345887	0.573377
AT4G28740.1	1.318	0.0473444	0.179139	0.933237
AT5G23405.2	1.421	0.164983	0.291579	0.767155
AT3G16140.1	1.216	0.254978	0.323409	0.654105
AT1G51610.1	0.93	0.0705707	0.177897	0.873265
AT1G08370.1	0.653	0.0526413	0.155077	0.902663
AT2G22490.1	1.798	0.280941	0.407316	0.705542
AT2G22490.2	1.821	0.283018	0.411801	0.707035
AT1G24020.1	1.033	0.170054	0.303352	0.785167
AT3G16720.1	1.059	0.111	0.249794	0.849556
AT5G47435.1	1.419	0.321516	0.442185	0.689637
AT1G07135.1	0.878	0.303481	0.292022	0.53235
AT4G32070.1	0.989	0.268718	0.335969	0.650357
AT1G66100.1	1.148	0.27307	0.355809	0.665395
AT5G60640.1	0.958	0.250192	0.310386	0.646999
AT5G60640.2	0.99	0.256731	0.32056	0.649686
AT5G60640.3	0.969	0.255154	0.314122	0.643874
AT1G25211.1	NA	NA	NA	NA
AT3G52420.1	1.054	0.210538	0.293604	0.684888
AT3G53500.2	1.269	0.149053	0.283674	0.801772
AT3G53500.1	1.991	0.259144	0.366995	0.691897
AT5G60620.1	1.239	0.294558	0.390262	0.675366
AT2G47850.1	0.942	0.10794	0.237036	0.840858
AT1G45249.1	1.401	0.386127	0.385487	0.552025
AT1G45249.2	1.42	0.409366	0.396649	0.538646
AT1G45249.3	1.441	0.332794	0.386833	0.618999
AT2G01100.1	1.205	0.260321	0.320411	0.634635
AT2G01100.3	1.518	0.168105	0.281262	0.750659
AT2G01100.2	1.413	0.323237	0.372904	0.608009
AT5G27860.1	NA	NA	NA	NA
AT3G19050.1	0.546	0.0371068	0.137417	0.932039
AT4G23885.1	1.335	0.298178	0.373922	0.644007
AT5G27860.2	NA	NA	NA	NA
AT1G54310.1	0.401	0.0334167	0.110831	0.916667
AT1G54770.1	1.188	0.197024	0.32815	0.760187
AT3G21610.2	2.796	0.156328	0.401565	0.868094
AT3G14350.2	0.66	0.0095618	0.0674732	0.982004
AT3G14350.1	1.676	0.14617	0.327141	0.849015
AT3G21610.1	2.755	0.331778	0.579487	0.764802
AT1G32160.1	0.492	0.0213913	0.100334	0.956522
AT3G27750.1	NA	NA	NA	NA
AT5G39740.2	0.646	0.0384444	0.137366	0.933821
AT5G54860.1	1.032	0.152153	0.278585	0.789151
AT2G21260.1	0.943	0.118143	0.295958	0.870502
AT3G07430.1	1.295	0.250941	0.340065	0.678677
AT4G24510.1	1.659	0.10356	0.272347	0.881615
AT1G70090.1	1.09	0.159343	0.256822	0.74312
AT1G70090.2	1.129	0.163015	0.264676	0.745531
AT3G21630.1	0.949	0.157265	0.261394	0.752335
AT1G70430.1	1.986	0.172464	0.384335	0.83318
AT4G27040.1	1.535	0.232094	0.331908	0.693095
AT3G21810.1	0.945	0.166509	0.243795	0.708599
AT1G17650.1	0.327	0.0511852	0.115863	0.841936
AT1G76405.2	1.161	0.143302	0.276617	0.807824
AT4G32605.1	1.996	0.345921	0.507	0.705505
AT2G41500.1	0.904	0.196395	0.279872	0.693475
AT5G51640.1	0.52	0.0305882	0.122353	0.941176
AT1G76670.1	1.47	0.307432	0.366526	0.625711
AT3G21430.2	1.287	0.195462	0.329814	0.75916
AT3G48820.1	0.461	0.0461	0.1383	0.9
AT3G48820.2	0.46	0.0575	0.152131	0.875
AT1G71850.1	0.766	0.142811	0.233894	0.749931
AT2G26900.1	1.041	0.226705	0.283942	0.643798
AT2G46535.1	1.355	0.168911	0.269282	0.719177
AT4G26670.1	1.116	0.109806	0.247536	0.850667
AT1G36050.2	0.975	0.157886	0.237792	0.720184
AT3G58500.1	1.385	0.29516	0.349802	0.621033
AT5G54720.1	0.93	0.111789	0.203765	0.783708
AT3G02870.1	0.876	0.0480118	0.149247	0.913173
AT3G02870.3	0.438	0.0103059	0.066391	0.976471
AT3G02870.2	0.967	0.0531176	0.16493	0.913004
AT5G47110.1	1.75	0.341231	0.402062	0.608637
AT1G18250.1	1.331	0.236	0.416291	0.781653
AT1G18250.2	1.288	0.059241	0.198206	0.919059
AT3G63440.1	0.839	0.0127121	0.102488	0.984848
AT3G66652.2	1.481	0.063425	0.254461	0.943782
AT2G03710.2	1.64	0.25827	0.387532	0.717692
AT2G03710.3	1.743	0.273541	0.411602	0.718802
AT4G21540.3	0.961	0.159121	0.302845	0.805018
AT5G20000.1	1.694	0.141489	0.339276	0.865279
AT5G54310.1	0.888	0.11728	0.225932	0.807141
AT4G18060.1	1.157	0.149596	0.293719	0.810938
AT2G19880.2	1.02	0.169825	0.310989	0.788763
AT5G20140.2	0.414	0.0347895	0.109417	0.910883
AT5G40970.1	1.495	0.342091	0.50685	0.716075
AT5G59250.1	1.376	0.191632	0.367591	0.807861
AT2G46370.4	0.451	0.0060748	0.0500759	0.98625
AT4G29480.1	1.007	0.164	0.274952	0.764843
AT5G37830.1	1.529	0.245339	0.395664	0.750273
AT3G49601.1	1.522	0.393617	0.396013	0.548517
AT5G44800.1	1.055	0.075125	0.20893	0.894208
AT3G06190.1	1.453	0.272765	0.347968	0.654895
AT4G00730.2	1.131	0.0945888	0.235692	0.873297
AT4G00730.1	1.111	0.0929137	0.231429	0.873216
AT4G38260.1	1.389	0.0520391	0.185212	0.926902
AT2G29580.1	0.858	0.264609	0.353662	0.667058
AT3G16810.1	1.087	0.176204	0.293121	0.757807
AT2G46220.1	0.964	0.176078	0.264825	0.722444
AT5G14120.1	1.471	0.2112	0.3357	0.745563
AT5G24630.5	0.698	0.0366824	0.130051	0.928884
AT5G24630.4	0.692	0.0363529	0.128889	0.92889
AT5G04480.2	1.576	0.258797	0.375268	0.69673
AT5G24630.6	0.444	0.0408276	0.128299	0.908046
AT5G24630.1	0.697	0.0366706	0.129991	0.928864
AT5G24630.3	0.436	0.040092	0.125987	0.908046
AT5G52470.1	0.873	0.210345	0.282397	0.681546
AT4G15560.1	0.983	0.108293	0.226322	0.832092
AT4G00750.1	1.391	0.239741	0.369213	0.725486
AT2G40660.1	1.363	0.361273	0.377055	0.569031
AT3G52155.1	1.034	0.102069	0.263297	0.881803
AT4G39350.1	0.907	0.156909	0.249296	0.735437
AT3G52390.1	0.86	0.179273	0.306905	0.766919
AT1G76360.1	1.089	0.183889	0.296519	0.748386
AT1G09160.2	0.951	0.141333	0.265866	0.795837
AT5G66530.1	0.88	0.195984	0.272486	0.694828
AT5G57350.2	1.039	0.33395	0.355294	0.575887
AT3G58040.1	1.292	0.262645	0.338181	0.656652
AT4G35750.1	1.434	0.171937	0.273166	0.735267
AT3G59890.2	0.499	0.011881	0.0760752	0.97619
AT3G59890.1	0.993	0.0910267	0.243279	0.887312
AT2G45910.1	0.969	0.0762254	0.195718	0.87421
AT1G20110.1	1.628	0.282684	0.425898	0.713672
AT3G51040.1	1.389	0.164229	0.333284	0.821118
AT3G53900.2	1.813	0.261	0.448766	0.759396
AT3G53900.1	1.392	0.216958	0.403936	0.798424
AT5G54300.1	0.789	0.120089	0.238443	0.810199
AT1G09590.1	0.744	0.0854545	0.191971	0.850462
AT2G39000.1	2.028	0.252889	0.540365	0.826255
AT1G18030.2	1.79	0.512818	0.558821	0.588824
AT4G30950.1	1.159	0.177741	0.292003	0.752019
AT5G22770.2	1.161	0.181745	0.320811	0.780138
AT4G38040.1	1.159	0.131762	0.264905	0.813267
AT2G26500.2	1.148	0.180519	0.260798	0.683141
AT2G26500.3	1.151	0.28972	0.330562	0.610463
AT3G04880.1	NA	NA	NA	NA
AT4G35080.1	1.202	0.256462	0.356816	0.68654
AT4G35080.3	1.263	0.2695	0.374892	0.686451
AT1G80460.2	0.775	0.0970426	0.193383	0.815769
AT1G20770.1	1.228	0.141437	0.298611	0.831598
AT5G61020.1	1.073	0.222667	0.293228	0.659154
AT2G36145.1	0.506	0.129938	0.168689	0.665133
AT5G17070.1	1.236	0.398	0.358595	0.500494
AT5G22770.1	1.134	0.209952	0.301259	0.703217
AT5G04870.1	1.371	0.214142	0.298937	0.688364
AT5G46430.2	1.222	0.435296	0.367207	0.476449
AT5G46430.1	1.228	0.3838	0.353536	0.507831
AT1G67470.1	0.542	0.0813	0.193533	0.85
AT1G56240.1	1.018	0.0787255	0.225482	0.897224
AT3G48420.1	1.194	0.233321	0.341864	0.712166
AT2G22170.1	0.805	0.159564	0.255006	0.74783
AT4G19120.1	1.102	0.276103	0.332451	0.634615
AT4G19120.2	1.001	0.227966	0.322691	0.701402
AT1G04635.1	0.71	0.23	0.281978	0.62628
AT3G06670.2	1.434	0.13807	0.294103	0.836311
AT3G06670.1	1.408	0.266677	0.359369	0.678107
AT1G43670.1	1.346	0.208062	0.325507	0.73389
AT5G63905.1	1.087	0.242023	0.353845	0.71438
AT4G09650.1	1.3	0.296526	0.356578	0.624825
AT2G31600.1	NA	NA	NA	NA
AT3G17712.2	NA	NA	NA	NA
AT2G31600.2	NA	NA	NA	NA
AT3G17712.3	0.427	0.06405	0.152469	0.85
AT5G01530.1	1.031	0.261463	0.329887	0.655173
AT1G20960.1	1.098	0.225704	0.325581	0.704259
AT1G20960.2	1.1	0.226085	0.326323	0.704494
AT1G30460.1	0.826	0.0576279	0.168561	0.899225
AT3G50670.1	1.139	0.218422	0.341224	0.737415
AT3G50670.2	1.278	0.308479	0.409544	0.672417
AT4G01330.1	1.122	0.225397	0.323216	0.704223
AT4G01330.2	1.155	0.169701	0.300284	0.780595
AT4G36420.1	0.916	0.389156	0.316222	0.461809
AT5G09220.1	0.946	0.10181	0.211573	0.829084
AT3G05410.2	0.613	0.0567234	0.147806	0.879555
AT3G54050.1	0.493	0.0644571	0.127014	0.813678
AT3G54050.2	0.489	0.0516977	0.116308	0.850014
AT3G05410.1	0.82	0.0757872	0.197535	0.879604
AT2G14460.1	1.516	0.270808	0.366264	0.676219
AT3G19990.1	0.495	0.253375	0.18329	0.384713
AT2G33570.1	1.416	0.214485	0.362007	0.765195
AT1G60995.1	1.63	0.34565	0.41859	0.629747
AT2G27100.1	1.171	0.236684	0.34421	0.705874
AT4G13220.1	1.017	0.2706	0.364189	0.673725
AT4G39330.2	0.908	0.155789	0.281803	0.790176
AT2G29500.1	0.622	0.220511	0.216739	0.538914
AT5G05450.1	0.64	0.0718437	0.167625	0.853075
AT2G20760.1	1.239	0.227836	0.310955	0.675506
AT5G65430.1	0.773	0.199111	0.250598	0.653859
AT5G65430.2	0.771	0.192689	0.246874	0.661249
AT5G65430.3	0.792	0.0901471	0.195779	0.843117
AT3G17780.1	1.249	0.381453	0.398339	0.571615
AT5G54440.1	0.985	0.119345	0.24465	0.821594
AT2G28430.1	1.144	0.327619	0.354001	0.585901
AT4G14570.1	1.618	0.378788	0.496276	0.668847
AT3G02860.2	1.193	0.16536	0.286107	0.77073
AT1G48920.1	0.586	0.119717	0.181739	0.728602
AT2G28890.1	1.163	0.09314	0.220635	0.856889
AT1G08580.1	0.849	0.178611	0.240835	0.674771
AT3G08610.1	1.033	0.316227	0.307852	0.534668
AT1G09150.1	1.198	0.276754	0.342834	0.642429
AT3G06700.1	1.45	0.314226	0.372429	0.621876
AT2G01970.1	1.064	0.123093	0.273439	0.846155
AT3G19650.1	1.161	0.2558	0.339395	0.669507
AT5G65000.1	1.686	0.316857	0.442473	0.690179
AT1G07020.1	0.963	0.204906	0.298011	0.71178
AT5G65000.2	1.745	0.327939	0.457959	0.690192
AT4G21150.2	1.28	0.111594	0.267147	0.8609
AT4G21150.3	0.725	0.0354583	0.132837	0.936387
AT4G21150.1	1.279	0.12065	0.279681	0.854052
AT3G61080.1	0.611	0.0573333	0.160419	0.894729
AT5G65020.2	NA	NA	NA	NA
AT5G65020.1	0.916	0.176763	0.274946	0.73607
AT1G23290.1	0.851	0.203437	0.264272	0.663998
AT5G47500.1	1.308	0.198182	0.371018	0.799208
AT1G34000.1	1.237	0.30318	0.424275	0.695878
AT3G53410.1	1.065	0.1145	0.294098	0.875835
AT5G23940.1	1.926	0.405	0.423944	0.560866
AT1G28660.2	1.514	0.446455	0.441255	0.512319
AT3G05900.1	1.026	0.219788	0.306927	0.694294
AT1G55140.1	NA	NA	NA	NA
AT1G28660.1	1.415	0.5165	0.428435	0.461209
AT3G23660.1	1.121	0.209595	0.344552	0.74978
AT2G26560.1	1.497	0.401429	0.380028	0.520574
AT2G39080.1	0.661	0.1005	0.188195	0.793338
AT3G23660.2	1.163	0.217429	0.357439	0.749791
AT4G02120.1	0.981	0.204432	0.283061	0.685287
AT4G31420.1	1.158	0.222919	0.323796	0.710469
AT2G38870.1	1.507	0.388601	0.41649	0.581545
AT5G38480.2	1.263	0.236338	0.318827	0.676407
AT5G38480.1	1.236	0.239338	0.316824	0.669356
AT3G02110.1	1.192	0.13787	0.285155	0.823626
AT1G17470.1	1.162	0.228913	0.309659	0.682364
AT5G49470.3	1.043	0.115026	0.247449	0.833694
AT3G14400.1	1.333	0.170504	0.306846	0.779121
AT1G17470.2	1.16	0.17387	0.310629	0.786572
AT1G09130.3	0.875	0.208722	0.272961	0.666304
AT1G09130.2	0.869	0.263407	0.287056	0.585937
AT1G09130.1	0.868	0.264778	0.284693	0.579744
AT1G55150.1	1.348	0.139122	0.317998	0.855608
AT1G07780.4	1.497	0.0789277	0.22979	0.901654
AT1G07780.5	1.216	0.107992	0.237437	0.840091
AT1G07780.2	1.175	0.163736	0.265379	0.7415
AT1G07780.3	1.456	0.0768128	0.223539	0.901577
AT1G07780.1	1.354	0.159737	0.296008	0.791641
AT1G31220.1	1.137	0.13837	0.276617	0.810288
AT3G10070.1	0.455	0.0413636	0.130803	0.909091
AT5G19010.1	1.374	0.155233	0.273446	0.772825
AT4G25630.1	2.105	0.336179	0.474481	0.686661
AT4G22250.1	1.209	0.18813	0.325567	0.773478
AT4G16360.3	1.423	0.142596	0.288191	0.816212
AT4G16360.2	1.328	0.15489	0.273635	0.774706
AT4G16360.1	1.315	0.163785	0.278	0.760412
AT2G29970.1	1.448	0.198905	0.324381	0.748346
AT5G19030.2	1.015	0.186357	0.330706	0.781306
AT5G16750.1	0.671	0.0752973	0.175153	0.849867
AT4G26970.1	1.08	0.109247	0.209898	0.79406
AT3G22320.1	1.102	0.248554	0.331876	0.676177
AT1G68160.1	0.572	0.0429	0.15066	0.925
AT3G09490.1	0.775	0.0395	0.157104	0.944571
AT5G66210.4	1.016	0.0343571	0.148478	0.953008
AT3G11720.1	0.822	0.0646452	0.179025	0.88714
AT5G66210.1	0.979	0.033131	0.143156	0.953001
AT4G13430.1	1.081	0.309963	0.323406	0.570038
AT5G66210.3	1.006	0.0340238	0.147049	0.953022
AT5G22330.1	1.134	0.306292	0.343343	0.601947
AT1G06960.1	0.904	0.141441	0.256636	0.781347
AT5G63780.1	1.285	0.203773	0.312931	0.722514
AT1G06960.3	0.917	0.0819559	0.204297	0.869299
AT1G06960.2	0.916	0.139829	0.257445	0.786292
AT3G24515.1	0.696	0.119154	0.206633	0.756352
AT1G02050.1	0.7	0.0428108	0.148225	0.927723
AT4G26080.1	1.05	0.090851	0.205906	0.847102
AT3G52150.2	0.95	0.2755	0.318593	0.618471
AT3G52150.1	0.939	0.272	0.314925	0.619019
AT3G52890.2	1.107	0.106932	0.240199	0.84484
AT2G43410.3	1.409	0.13574	0.275062	0.81239
AT3G52890.1	0.992	0.0457082	0.165685	0.933863
AT5G09590.1	1.022	0.14772	0.258522	0.771742
AT1G62422.1	1.224	0.0437143	0.227146	0.964286
AT3G12570.1	1.151	0.137432	0.251468	0.776662
AT3G12570.3	1.158	0.125229	0.242774	0.802145
AT3G12570.2	1.174	0.216401	0.305325	0.692435
AT3G12570.4	1.168	0.0905275	0.208444	0.843787
AT5G55070.1	1.224	0.17038	0.317217	0.796879
AT4G02520.1	1.349	0.206582	0.32134	0.73371
AT3G52140.4	1.17	0.157604	0.274059	0.772038
AT2G40830.3	1.618	0.238918	0.406308	0.766207
AT2G40830.1	1.568	0.329769	0.431226	0.665737
AT5G29000.1	0.556	0.0328367	0.11302	0.926168
AT3G52140.1	1.148	0.211658	0.301044	0.698945
AT3G52140.2	1.165	0.15691	0.272955	0.772145
AT5G29000.2	0.355	0.0221875	0.0859318	0.9375
AT1G10570.1	0.911	0.17968	0.324149	0.782315
AT2G36000.2	1.005	0.158158	0.25263	0.745187
AT1G10570.2	1.174	0.225	0.370916	0.755309
AT5G63310.1	1.173	0.383	0.416217	0.580716
AT5G53120.4	1.462	0.0674568	0.258589	0.942673
AT2G36000.1	1.006	0.161333	0.253457	0.739357
AT2G05310.1	0.807	0.0758636	0.171442	0.847772
AT4G38090.4	1.775	0.115924	0.336537	0.903556
AT2G42770.1	1.899	0.305816	0.485075	0.739073
AT4G12970.1	0.939	0.287062	0.320559	0.599445
AT4G38090.1	1.687	0.264235	0.47192	0.77932
AT1G80810.2	0.393	0.0585319	0.139918	0.851064
AT4G38090.3	1.763	0.285647	0.497196	0.770423
AT4G38090.2	1.87	0.295412	0.524111	0.777052
AT3G22520.1	1.33	0.3385	0.340306	0.536235
AT4G00026.1	0.789	0.144364	0.227506	0.737526
AT5G50640.1	0.882	0.0699194	0.173896	0.867357
AT1G55330.1	1.294	0.383111	0.399519	0.571883
AT1G48790.1	1.107	0.143617	0.259359	0.779017
AT1G35460.1	0.949	0.10613	0.244271	0.856538
AT1G49470.1	1.819	0.344811	0.483517	0.691674
AT5G52280.1	0.636	0.061	0.138154	0.841767
AT1G73820.1	0.894	0.104097	0.226112	0.83903
AT5G53120.3	1.476	0.0706471	0.259225	0.937822
AT1G75220.1	1.59	0.298178	0.431055	0.707634
AT3G48560.1	0.775	0.131278	0.218049	0.75556
AT1G16320.1	1.412	0.333117	0.36733	0.593086
AT1G11430.1	0.662	0.0931765	0.21124	0.842766
AT4G01100.2	1.313	0.178045	0.291273	0.743845
AT4G01100.1	1.304	0.183462	0.292568	0.734179
AT3G62220.1	1.387	0.164163	0.34848	0.836745
AT2G47640.4	1.27	0.255321	0.337811	0.672603
AT1G07810.1	1.788	0.267442	0.439543	0.750617
AT1G80500.1	1.329	0.305116	0.378023	0.646827
AT2G47640.1	1.062	0.237037	0.314682	0.6761
AT2G47640.2	1.034	0.215537	0.28453	0.670942
AT2G47640.3	1.219	0.260528	0.316694	0.632182
AT5G57760.1	NA	NA	NA	NA
AT1G68590.1	1.396	0.116923	0.270455	0.84558
AT1G68590.2	1.393	0.110282	0.265055	0.853874
AT3G19180.2	0.879	0.08625	0.211056	0.860275
AT4G00585.1	1.537	0.230687	0.365055	0.738013
AT1G75510.1	1.347	0.409333	0.363711	0.496737
AT4G30160.2	0.635	0.0711284	0.170047	0.858435
AT1G73230.1	1.219	0.25669	0.323246	0.647107
AT1G66410.2	1.328	0.17259	0.326235	0.803934
AT1G66410.1	1.342	0.294422	0.383888	0.667619
AT1G04430.2	1.224	0.0731413	0.208283	0.89591
AT4G12040.2	1.146	0.0547663	0.173174	0.917405
AT5G07470.1	0.848	0.111778	0.202486	0.776629
AT4G12040.1	1.105	0.143227	0.238535	0.759846
AT4G27280.1	1.298	0.546643	0.366048	0.382552
AT1G76800.1	1.221	0.284452	0.346784	0.629665
AT1G69230.1	0.791	0.0497391	0.16543	0.921367
AT5G38600.1	0.885	0.114091	0.236543	0.827903
AT5G65310.1	1.287	0.214721	0.296285	0.687197
AT3G11170.1	1.3	0.27402	0.352102	0.661217
AT1G26760.1	NA	NA	NA	NA
AT1G76820.1	0.865	0.095127	0.219367	0.855686
AT3G58640.2	1.421	0.177174	0.334046	0.802261
AT5G53460.2	0.885	0.174233	0.240968	0.688849
AT3G54400.1	1.507	0.382618	0.498668	0.668521
AT1G24040.1	0.785	0.0845238	0.21339	0.872703
AT4G35830.1	1.12	0.169772	0.269705	0.741839
AT4G22140.1	1.584	0.238274	0.372966	0.732727
AT4G22140.2	1.494	0.239596	0.361584	0.717817
AT2G33730.1	1.032	0.241843	0.270313	0.597561
AT3G26782.1	0	0	0	NA
AT3G55240.1	1.144	0.144478	0.279375	0.800691
AT4G33666.1	1.228	0.139724	0.286193	0.825183
AT4G21810.1	1.472	0.261319	0.415354	0.745112
AT5G11260.1	1.428	0.20459	0.373186	0.789922
AT4G05420.1	0.959	0.199037	0.309064	0.734377
AT4G05420.2	0.955	0.198073	0.30767	0.734497
AT5G61160.1	0.701	0.1032	0.212929	0.820487
AT3G01540.4	1.366	0.27498	0.353089	0.660881
AT4G18390.1	1.108	0.126713	0.28244	0.845178
AT3G07950.1	1.141	0.247836	0.363028	0.712851
AT3G55260.1	0.947	0.132256	0.266799	0.814856
AT5G56950.1	1.263	0.140798	0.267872	0.798101
AT3G24120.2	0.911	0.0764528	0.192078	0.872635
AT3G24120.1	0.785	0.184208	0.256392	0.689013
AT1G50490.1	1.183	0.210628	0.336655	0.746292
AT1G65470.2	1.441	0.201135	0.359801	0.781095
AT3G23600.2	1.101	0.221958	0.332888	0.719299
AT3G23600.1	1.074	0.217208	0.325254	0.718852
AT1G54050.1	1.604	0.557738	0.457264	0.463482
AT2G39930.1	0.689	0.100115	0.22896	0.849951
AT2G38810.3	0.913	0.0387407	0.150054	0.939735
AT2G38810.2	0.892	0.1276	0.279339	0.839812
AT2G38810.1	0.913	0.0266531	0.139475	0.967309
AT5G10400.1	1.312	0.438357	0.389125	0.498927
AT4G22320.1	1.072	0.267712	0.318867	0.628414
AT4G22320.2	1.074	0.188088	0.289602	0.732553
AT4G23600.1	1.159	0.326643	0.334006	0.550522
AT1G65280.1	1.435	0.404508	0.397788	0.543837
AT4G23600.3	1.194	0.336357	0.343947	0.550504
AT1G13880.1	1.406	0.160323	0.302102	0.791674
AT3G26510.4	1.182	0.324929	0.352347	0.585011
AT3G26510.5	1.288	0.400515	0.39773	0.547008
AT4G15130.1	0.898	0.241716	0.287328	0.627486
AT3G47370.1	1.598	0.342217	0.448343	0.670408
AT3G26510.1	1.212	0.355452	0.367649	0.563536
AT3G26510.2	1.192	0.318667	0.353277	0.594957
AT3G26510.3	1.25	0.334405	0.370417	0.59457
AT3G46610.1	0.876	0.107491	0.2106	0.810359
AT2G15280.2	0.409	0.0876429	0.167823	0.785714
AT2G15280.1	0.41	0.111818	0.182598	0.727273
AT2G30260.1	1.304	0.26722	0.350045	0.666137
AT1G12880.1	1.028	0.0622941	0.166053	0.880294
AT4G32570.1	0.747	0.0980225	0.184038	0.790623
AT5G14740.5	0.636	0.0242097	0.100472	0.949824
AT5G65620.1	0.535	0.15725	0.192888	0.618133
AT1G72250.2	0.517	0.0235	0.107691	0.954545
AT1G14410.1	1.048	0.221615	0.326645	0.714078
AT2G30200.2	0.844	0.0375664	0.141379	0.940513
AT3G16180.1	1.183	0.225784	0.351483	0.733228
AT1G55810.3	0.609	0.0404828	0.130601	0.916858
AT2G30200.1	0.807	0.18232	0.265449	0.710592
AT1G63120.1	1.522	0.169104	0.315777	0.786012
AT4G34030.1	1.112	0.190089	0.293874	0.732502
AT2G41750.1	NA	NA	NA	NA
AT4G22930.1	1.263	0.160532	0.299061	0.79189
AT4G37310.1	0.755	0.0489844	0.155591	0.913203
AT3G60380.1	1.097	0.214899	0.296581	0.676433
AT5G16070.1	0.895	0.162577	0.250277	0.729144
AT4G33650.2	1.193	0.100008	0.249415	0.872047
AT1G78570.1	0.88	0.0994239	0.186424	0.786025
AT4G33650.1	1.17	0.154421	0.292313	0.79788
AT1G27350.1	1.797	0.368431	0.461422	0.641567
AT5G64360.3	1.041	0.187317	0.28601	0.724886
AT5G64360.1	1.186	0.211049	0.32593	0.729249
AT2G30950.1	1.52	0.25012	0.377587	0.71557
AT1G18700.2	0.948	0.123333	0.277159	0.848485
AT4G29680.1	1.27	0.282545	0.375741	0.669109
AT1G18700.1	0.917	0.119242	0.268011	0.848531
AT1G68190.1	0.915	0.1326	0.256373	0.806709
AT1G18700.4	0.916	0.0708065	0.209969	0.905893
AT5G10920.1	1.632	0.381839	0.458949	0.627524
AT1G53885.1	1.168	0.129795	0.274158	0.833451
AT5G26910.3	1.04	0.107502	0.228294	0.827548
AT3G10040.1	0.812	0.0239592	0.119075	0.963095
AT1G69250.1	0.823	0.0262214	0.111276	0.949463
AT1G69250.2	0.842	0.0268321	0.113907	0.949497
AT3G03460.1	0.784	0.0803421	0.212696	0.883368
AT3G58670.1	1.564	0.15942	0.304059	0.794452
AT1G72640.2	0.94	0.141265	0.216582	0.722388
AT3G11630.1	0.84	0.195194	0.280114	0.7073
AT2G47840.1	0.987	0.161743	0.281136	0.777167
AT2G34090.3	1.226	0.0807302	0.246394	0.912364
AT3G54090.1	0.492	0.123769	0.177072	0.700961
AT2G34090.1	1.214	0.103531	0.272711	0.886132
AT2G33770.1	1.804	0.215179	0.34461	0.739644
AT3G59310.1	0.935	0.137815	0.26883	0.807633
AT3G61070.1	1.222	0.1875	0.289451	0.720677
AT3G54840.2	1.035	0.124767	0.246396	0.809269
AT1G08180.1	1.073	0.0751111	0.241098	0.917671
AT5G57930.1	0.323	0.00734091	0.0481376	0.977273
AT5G57930.2	0.646	0.126068	0.178297	0.690812
AT5G52370.1	0.95	0.241111	0.286856	0.629493
AT1G20510.1	1.56	0.324294	0.46377	0.673104
AT1G20510.2	1.62	0.479182	0.548055	0.588089
AT5G14570.1	1.989	0.259532	0.424301	0.74581
AT2G25355.1	1.592	0.200667	0.352377	0.768956
AT1G25450.1	1.221	0.171545	0.328279	0.80598
AT2G17530.2	1.265	0.182326	0.29973	0.7509
AT5G09740.1	0.584	0.0628333	0.160652	0.87977
AT2G44620.1	1.035	0.211025	0.311365	0.711595
AT4G35110.4	0	0	0	NA
AT4G35110.3	0.529	0.0158846	0.082617	0.96694
AT4G35110.2	1.051	0.0505	0.185993	0.934633
AT4G35110.1	1.058	0.0473731	0.176549	0.935323
AT2G42590.3	1.374	0.20948	0.320469	0.718724
AT2G42590.2	1.312	0.19872	0.305332	0.720246
AT2G42590.1	1.285	0.19393	0.298839	0.72129
AT4G26640.2	0.888	0.159657	0.280694	0.772952
AT1G16880.2	1.204	0.248534	0.324104	0.66696
AT1G16880.1	1.104	0.187837	0.264313	0.693088
AT2G27450.2	0.581	0.0387333	0.144927	0.933333
AT4G09180.1	1.26	0.299192	0.367022	0.641846
AT5G46390.2	1.012	0.158714	0.288582	0.779285
AT1G28420.1	0.683	0.0978056	0.205305	0.825436
AT5G46390.1	NA	NA	NA	NA
AT2G21620.2	1.7	0.235759	0.380687	0.745435
AT4G35100.1	1.393	0.333551	0.361964	0.575756
AT4G35100.2	1.424	0.233565	0.343829	0.707384
AT2G21620.1	1.6	0.212804	0.356204	0.758725
AT4G00950.1	1.015	0.310278	0.374226	0.633786
AT1G32790.1	1.125	0.113458	0.277567	0.871479
AT4G00090.1	0.844	0.118167	0.245055	0.828632
AT1G29970.1	1.17	0.255657	0.310441	0.622305
AT1G29970.3	1.224	0.267299	0.32489	0.622752
AT1G29970.2	0.967	0.238429	0.26144	0.574836
AT5G57700.3	NA	NA	NA	NA
[truncated: 14,842 more rows]

## Sheet: R6
R6 Shoot Salt 5’UTR Derived Reactivity Statistics
[truncated: 15,876 more rows]

[truncated: 11 more sheets: R7, R8, R9, R10, R11, R12, R13, R14, R15, R16, R17]
