# Supplementary material
Source: HighWire-hosted journal article supplement (doi:10.1101/rna.072850.119)
Supplement: Supplemental_Data_3.xlsx [file Supplemental_Data_3.xlsx]

## Sheet: S0
S0 Index of Supplemental Tables
Table	Contents
S0	Index of Supplemental Tables
S1	Reactivity Metrics and Statistical Tests
S2	Solute Quantification
S3	Solute Concentration ANOVAs
S4	Reactivity ANOVAs
S5	Tissue Specific Comparisons
S6	Abundance Change Relationships
S7	Concordant Transcripts
S8	Abundance Relationships

## Sheet: S1
S1 Reactivity Metrics and Statistical Tests																			Fisher Z-Test Results for Pearson Correlations (p-values)
S1A Mean Reactvity										Pearson Correlation		Spearman Rank Correlation		Kendall Rank Correlation					Shoot Control x Shoot Salt				Root Control x Root Salt				Shoot Control x Root Salt				Shoot Salt x Root Salt
Sample A	Sample B	Category	n	t-test p	Mean A	Mean B	SD A	SD B	ks-test p	r	p	ρ	p	τ	p	Increases	Decreases	No Change	transcript	5'UTR	CDS	3'UTR	transcript	5'UTR	CDS	3'UTR	transcript	5'UTR	CDS	3'UTR	transcript	5'UTR	CDS	3'UTR
Shoot Control	Shoot Salt	transcript	15875	1.801e-10	0.27542	0.271743	0.0444027	0.057454	2.2e-16	0.890054	2.2e-16	0.896267	2.2e-16	0.725574	2.2e-16	6352	9523	0	1	0	0.0001	0	0.0002	0	0	0.0026	0	0	0	0	0	0	0	0
		5'UTR	14435	8.427e-07	0.191569	0.185111	0.108828	0.113856	1.613e-12	0.872288	2.2e-16	0.883033	2.2e-16	0.708734	2.2e-16	6115	8316	4	0	1	0.0025	0	0.0009	0	0.7671	0.0002	0	0	0	0	0	0	0	0
		CDS	15719	2.2e-16	0.315192	0.308522	0.0578911	0.071786	2.2e-16	0.880369	2.2e-16	0.888159	2.2e-16	0.716084	2.2e-16	5967	9750	2	0.0001	0.0025	1	0	0.7598	0	0.0007	0.39	0	0	0	0	0	0	0	0
		3'UTR	14393	2.2e-16	0.139303	0.152137	0.0840673	0.0923472	2.2e-16	0.915431	2.2e-16	0.917332	2.2e-16	0.751131	2.2e-16	9101	5288	4	0	0	0	1	0	0	0	0	0	0	0	0	0	0	0	0
Root Control	Root Salt	transcript	15725	2.2e-16	0.273085	0.291563	0.0415962	0.0583111	2.2e-16	0.881142	2.2e-16	0.887691	2.2e-16	0.715067	2.2e-16	12376	3348	1	0.0002	0.0009	0.7598	0	1	0	0.0002	0.5743	0	0	0	0	0	0	0	0
		5'UTR	14334	9.67e-14	0.207611	0.218288	0.111364	0.130576	8.24e-12	0.842953	2.2e-16	0.846676	2.2e-16	0.664817	2.2e-16	7853	6481	0	0	0	0	0	0	1	0	0	0	0	0	0	0	0	0	0.003
		CDS	15570	2.2e-16	0.307239	0.331485	0.0531892	0.0745819	2.2e-16	0.871467	2.2e-16	0.883656	2.2e-16	0.711447	2.2e-16	12214	3355	1	0	0.7671	0.0007	0	0.0002	0	1	0	0	0	0	0	0	0	0	0
		3'UTR	14213	0.00143	0.148952	0.145834	0.0787446	0.0859326	9.215e-15	0.882588	2.2e-16	0.878987	2.2e-16	0.697576	2.2e-16	6531	7679	3	0.0026	0.0002	0.39	0	0.5743	0	0	1	0	0	0	0	0	0	0	0
Shoot Control	Root Control	transcript	13974	2.2e-16	0.274714	0.210242	0.0441556	0.0694607	2.2e-16	0.683923	2.2e-16	0.73837	2.2e-16	0.54565	2.2e-16	1065	12909	0	0	0	0	0	0	0	0	0	1	0.0324	0	0	0	0	0.6693	0
		5'UTR	12861	2.2e-16	0.19053	0.157101	0.108127	0.101835	2.2e-16	0.669754	2.2e-16	0.79528	2.2e-16	0.610381	2.2e-16	3499	9361	1	0	0	0	0	0	0	0	0	0.0324	1	0	0	0	0	0.0109	0
		CDS	13845	2.2e-16	0.315048	0.236995	0.0575676	0.0802726	2.2e-16	0.629341	2.2e-16	0.708616	2.2e-16	0.518694	2.2e-16	1053	12790	2	0	0	0	0	0	0	0	0	0	0	1	0	0	0	0	0
		3'UTR	12803	2.2e-16	0.139294	0.11335	0.0840563	0.0657062	2.2e-16	0.796569	2.2e-16	0.838827	2.2e-16	0.651658	2.2e-16	3814	8987	2	0	0	0	0	0	0	0	0	0	0	0	1	0	0	0	0
Shoot Salt	Root Salt	transcript	13737	2.2e-16	0.268725	0.221159	0.0431681	0.0643361	2.2e-16	0.719383	2.2e-16	0.774411	2.2e-16	0.58263	2.2e-16	1271	12466	0	0	0	0	0	0	0	0	0	0	0	0	0	1	0.4597	0	0
		5'UTR	12681	2.2e-16	0.183938	0.163273	0.109045	0.103113	2.2e-16	0.723748	2.2e-16	0.806745	2.2e-16	0.619456	2.2e-16	4450	8231	0	0	0	0	0	0	0	0	0	0	0	0	0	0.4597	1	0	0
		CDS	13607	2.2e-16	0.30545	0.251646	0.0568564	0.0761812	2.2e-16	0.686652	2.2e-16	0.759669	2.2e-16	0.568176	2.2e-16	1367	12240	0	0	0	0	0	0	0	0	0	0.6693	0.0109	0	0	0	0	1	0
		3'UTR	12586	2.2e-16	0.15115	0.11043	0.0889472	0.067399	2.2e-16	0.832139	2.2e-16	0.858375	2.2e-16	0.672311	2.2e-16	2362	10220	4	0	0	0	0	0	0.003	0	0	0	0	0	0	0	0	0	1
S1C Abundance Correlations log2(TPM)				Pearson Correlation		Spearman Rank Correlation		Kendall Rank Correlation		Fisher Z-Test Results for Pearson Correlations (p-values)									Fisher Z-Test Results for Pearson Correlations (p-values)
Sample A	Sample B	Category	n	r	p	ρ	p	τ	p	SCxSS	RCxRS	SCxRC	SSxRS
Shoot Control	Shoot Salt	transcript	15875	0.956468	2.2e-16	0.94354	2.2e-16	0.811741	2.2e-16	1	0	0	0
Root Control	Root Salt	transcript	15725	0.972966	2.2e-16	0.96619	2.2e-16	0.858097	2.2e-16	0	1	0	0
Shoot Control	Root Control	transcript	13974	0.745591	2.2e-16	0.736428	2.2e-16	0.570148	2.2e-16	0	0	1	0.0125
Shoot Salt	Root Salt	transcript	13737	0.732356	2.2e-16	0.73598	2.2e-16	0.574048	2.2e-16	0	0	0.0152	1
S1B Gini Reactivity										Pearson Correlation		Spearman Rank Correlation		Kendall Rank Correlation					Shoot Control x Shoot Salt				Root Control x Root Salt				Shoot Control x Root Salt				Shoot Salt x Root Salt
Sample A	Sample B	Category	n	t-test p	Mean A	Mean B	SD A	SD B	ks-test p	r	p	ρ	p	τ	p	Increases	Decreases	No Change	transcript	5'UTR	CDS	3'UTR	transcript	5'UTR	CDS	3'UTR	transcript	5'UTR	CDS	3'UTR	transcript	5'UTR	CDS	3'UTR
Shoot Control	Shoot Salt	transcript	15875	2.2e-16	0.676662	0.690671	0.0709612	0.0660549	2.2e-16	0.927744	2.2e-16	0.915163	2.2e-16	0.760979	2.2e-16	11751	4124	0	1	0	0.0763	0	0	0	0	0	0	0	0	0	0	0	0	0
		5'UTR	14435	2.2e-16	0.751761	0.763617	0.110556	0.107762	1.038e-12	0.842323	2.2e-16	0.836232	2.2e-16	0.652023	2.2e-16	8356	6029	50	0	1	0	0	0	0	0	0.0773	0	0	0	0	0	0	0	0
		CDS	15719	2.2e-16	0.633904	0.653374	0.0820424	0.0758466	2.2e-16	0.924914	2.2e-16	0.91528	2.2e-16	0.759049	2.2e-16	12071	3646	2	0.0763	0	1	0	0	0	0	0	0	0	0	0	0	0	0	0
		3'UTR	14393	2.2e-16	0.813017	0.801707	0.0913396	0.0932502	2.2e-16	0.87219	2.2e-16	0.862972	2.2e-16	0.679305	2.2e-16	5617	8611	165	0	0	0	1	0	0	0	0	0	0	0	0	0	0	0	0
Root Control	Root Salt	transcript	15725	2.2e-16	0.681401	0.6888	0.0667513	0.0692024	2.2e-16	0.939001	2.2e-16	0.925401	2.2e-16	0.774436	2.2e-16	10288	5436	1	0	0	0	0	1	0	0.04	0	0	0	0	0	0	0	0	0
		5'UTR	14334	2.2e-16	0.740414	0.751669	0.11143	0.113002	3.331e-16	0.827357	2.2e-16	0.818354	2.2e-16	0.633256	2.2e-16	8388	5894	52	0	0	0	0	0	1	0	0	0	0	0	0	0	0	0	0
		CDS	15570	3.388e-08	0.644481	0.649413	0.076702	0.0808555	2.776e-15	0.936194	2.2e-16	0.923436	2.2e-16	0.771114	2.2e-16	9166	6404	0	0	0	0	0	0.04	0	1	0	0	0	0	0	0	0	0	0
		3'UTR	14213	2.2e-16	0.805779	0.823053	0.0868671	0.0856884	2.2e-16	0.848282	2.2e-16	0.835383	2.2e-16	0.646974	2.2e-16	9052	5026	135	0	0.0773	0	0	0	0	0	1	0	0	0	0	0	0	0	0
Shoot Control	Root Control	transcript	13974	0.0397	0.677688	0.679391	0.0707347	0.067613	0.0001173	0.671826	2.2e-16	0.664766	2.2e-16	0.515447	2.2e-16	5859	8115	0	0	0	0	0	0	0	0	0	1	0	0	0	0.6915	0	0.0001	0
		5'UTR	12861	2.2e-16	0.753086	0.740401	0.110378	0.10988	2.2e-16	0.749153	2.2e-16	0.743151	2.2e-16	0.558067	2.2e-16	5290	7525	46	0	0	0	0	0	0	0	0	0	1	0	0.0031	0	0.3011	0	0.0379
		CDS	13845	1.011e-13	0.634436	0.641569	0.081695	0.0777344	3.586e-14	0.697683	2.2e-16	0.686616	2.2e-16	0.533143	2.2e-16	6581	7261	3	0	0	0	0	0	0	0	0	0	0	1	0	0	0	0.8692	0
		3'UTR	12803	2.2e-16	0.81343	0.803125	0.0909913	0.0867839	2.2e-16	0.732489	2.2e-16	0.734856	2.2e-16	0.552235	2.2e-16	5051	7649	103	0	0	0	0	0	0	0	0	0	0.0031	0	1	0	0.0001	0	0.3849
Shoot Salt	Root Salt	transcript	13737	0.0007597	0.689015	0.686223	0.0668578	0.0705231	0.004387	0.669201	2.2e-16	0.669243	2.2e-16	0.522809	2.2e-16	5302	8435	0	0	0	0	0	0	0	0	0	0.6915	0	0	0	1	0	0	0
		5'UTR	12681	2.2e-16	0.762575	0.751262	0.107946	0.111185	9.313e-10	0.754777	2.2e-16	0.749448	2.2e-16	0.564641	2.2e-16	5303	7333	45	0	0	0	0	0	0	0	0	0	0.3011	0	0.0001	0	1	0	0.002
		CDS	13607	8.007e-08	0.650852	0.645671	0.0767091	0.0824043	4.923e-05	0.696662	2.2e-16	0.690407	2.2e-16	0.540575	2.2e-16	5081	8526	0	0	0	0	0	0	0	0	0	0.0001	0	0.8692	0	0	0	1	0
		3'UTR	12586	2.2e-16	0.800528	0.819626	0.0936017	0.0858884	2.2e-16	0.737504	2.2e-16	0.739065	2.2e-16	0.555947	2.2e-16	7597	4890	99	0	0	0	0	0	0	0	0	0	0.0379	0	0.3849	0	0.002	0	1

## Sheet: S2
S2 Solute Quantification
S2A Proline Content (mg/g dry weight)
Tissue	Replicate	Control	100 mM NaCl
shoot	rep1-1	0.216104	9.63369
	rep1-2	0.318469	7.60914
	rep1-3	0.500452	7.76837
	rep2-1	0.181982	9.03088
	rep2-2	0.159235	6.52862
	rep2-3	0.216104	5.94855
	rep3-1	0.125113	6.99495
	rep3-2	0.2616	5.99405
	rep3-3	0.227478	5.53909
root	rep1-1	0.580069	8.10959
	rep1-2	0.295721	8.24608
	rep1-3	0	9.47446
	rep2-1	0	8.55317
	rep2-2	0	6.99495
	rep2-3	0.0341217	6.79022
	rep3-1	0	8.33707
	rep3-2	0.477704	6.42625
	rep3-3	0	6.4945
S2B Other Solutes (mg/g dry weight)
Tissue	Treatment	Ca (mg/g)	Fe (mg/g)	K (mg/g)	Mg (mg/g)	Mn (mg/g)	Na (mg/g)	P (mg/g)	Zn (mg/g)
shoot	control	52.3747	0.0874839	38.8464	7.05335	0.210844	0.852973	9.2463	0.106085
shoot	control	52.7652	0.0838312	34.2914	6.20581	0.196755	0.845871	8.85725	0.0858145
shoot	control	47.9122	0.291766	38.8168	5.87278	0.155614	1.09042	8.73184	0.0980063
root	control	6.07826	1.91095	78.9071	2.52725	0.655829	0.776582	11.6625	0.42285
root	control	5.99785	1.94206	76.7737	2.61579	0.774296	0.761207	11.5183	0.368693
root	control	6.68456	2.03908	75.8113	2.45376	0.236445	0.99409	12.126	0.412638
shoot	NaCl	38.2855	0.0671041	36.4672	3.94453	0.122221	28.2564	7.44128	0.0834522
shoot	NaCl	37.9048	0.164609	35.1852	4.75452	0.151712	19.2655	7.1231	0.0762818
shoot	NaCl	36.8031	0.080598	40.2456	5.02124	0.113974	24.4635	8.33878	0.0658661
root	NaCl	5.0112	1.09013	47.0699	2.13318	0.262264	29.4521	10.2826	0.25383
root	NaCl	4.82698	1.2618	35.6059	1.208	0.32477	13.3849	10.6216	0.15911
root	NaCl	4.77457	1.36978	48.1864	2.02867	0.0481622	28.8494	10.5689	0.23844
S2C Solutes Summary
Tissue	Treatment	Osmotica	Mean (mg/g)	SE (mg/g)
shoot	control	Proline	0.245171	0.037007
root	control	Proline	0.15418	0.0781162
shoot	NaCl	Proline	7.22748	0.471854
root	NaCl	Proline	7.71403	0.356431
shoot	control	Ca	51.0174	1.55665
root	control	Ca	6.25356	0.216746
shoot	NaCl	Ca	37.6644	0.444486
root	NaCl	Ca	4.87092	0.071755
shoot	control	Fe	0.15436	0.0687108
root	control	Fe	1.96403	0.0385856
shoot	NaCl	Fe	0.104104	0.0305025
root	NaCl	Fe	1.24057	0.0814204
shoot	control	K	37.3182	1.51343
root	control	K	77.1641	0.914748
shoot	NaCl	K	37.2993	1.51892
root	NaCl	K	43.6207	4.02034
shoot	control	Mg	6.37731	0.351424
root	control	Mg	2.53227	0.0468413
shoot	NaCl	Mg	4.57343	0.32374
root	NaCl	Mg	1.78995	0.292533
shoot	control	Mn	0.187738	0.016569
root	control	Mn	0.555523	0.163163
shoot	NaCl	Mn	0.129303	0.0114549
root	NaCl	Mn	0.211732	0.0837517
shoot	control	Na	0.929756	0.0803603
root	control	Na	0.84396	0.0751964
shoot	NaCl	Na	23.9951	2.606
root	NaCl	Na	23.8955	5.25817
shoot	control	P	8.94513	0.154874
root	control	P	11.7689	0.183324
shoot	NaCl	P	7.63439	0.363974
root	NaCl	P	10.4911	0.105318
shoot	control	Zn	0.0966352	0.00589151
root	control	Zn	0.401393	0.016614
shoot	NaCl	Zn	0.0752	0.00510541
root	NaCl	Zn	0.217126	0.0293465
S2D Solute t-tests
Sample A	Sample B	Solute	Mean A (mg/g)	Mean B (mg/g)	p-value
shoot control	root control	Proline	0.245171	0.154179	0.3143
shoot control	shoot NaCl	Proline	0.245171	7.22748	3.88e-07
shoot control	root NaCl	Proline	0.245171	7.71403	2.248e-08
shoot NaCl	root NaCl	Proline	7.22748	7.71403	0.4236
shoot NaCl	root control	Proline	7.22748	0.154179	2.506e-07
root control	root NaCl	Proline	0.154179	7.71403	9.461e-09
shoot control	root control	Ca	51.0174	6.25356	0.0009992
shoot control	shoot NaCl	Ca	51.0174	37.6645	0.009041
shoot control	root NaCl	Ca	51.0174	4.87092	0.001112
shoot NaCl	root NaCl	Ca	37.6644	4.87092	0.0001293
shoot NaCl	root control	Ca	37.6644	6.25356	1.189e-05
root control	root NaCl	Ca	6.25356	4.87092	0.01605
shoot control	root control	Fe	0.15436	0.104104	0.5555
shoot control	shoot NaCl	Fe	0.15436	1.96403	0.0001305
shoot control	root NaCl	Fe	0.15436	1.24057	0.0006002
shoot NaCl	root NaCl	Fe	1.96403	1.24057	0.004817
shoot NaCl	root control	Fe	1.96403	0.104104	4.91e-06
root control	root NaCl	Fe	0.104104	1.24057	0.002099
shoot control	root control	K	37.3182	77.1641	0.0001018
shoot control	shoot NaCl	K	37.3182	37.2993	0.9934
shoot control	root NaCl	K	37.3182	43.6207	0.2535
shoot NaCl	root NaCl	K	37.2993	43.6207	0.2525
shoot NaCl	root control	K	37.2993	77.1641	0.0001041
root control	root NaCl	K	77.1641	43.6207	0.01098
shoot control	root control	Mg	6.37731	2.53227	0.007422
shoot control	shoot NaCl	Mg	6.37731	4.57343	0.01975
shoot control	root NaCl	Mg	6.37731	1.78995	0.0006521
shoot NaCl	root NaCl	Mg	4.57343	1.78995	0.003207
shoot NaCl	root control	Mg	4.57343	2.53227	0.02236
root control	root NaCl	Mg	2.53227	1.78995	0.1231
shoot control	root control	Mn	0.187738	0.555523	0.1516
shoot control	shoot NaCl	Mn	0.187738	0.129302	0.05081
shoot control	root NaCl	Mn	0.187738	0.211732	0.8034
shoot NaCl	root NaCl	Mn	0.129302	0.211732	0.4291
shoot NaCl	root control	Mn	0.129302	0.555523	0.1199
root control	root NaCl	Mn	0.555523	0.211732	0.158
shoot control	root control	Na	0.929756	0.84396	0.4794
shoot control	shoot NaCl	Na	0.929756	23.9951	0.01246
shoot control	root NaCl	Na	0.929756	23.8955	0.0486
shoot NaCl	root NaCl	Na	23.9951	23.8955	0.9875
shoot NaCl	root control	Na	23.9951	0.84396	0.01238
root control	root NaCl	Na	0.84396	23.8955	0.04827
shoot control	root control	P	8.94513	11.7689	0.0003481
shoot control	shoot NaCl	P	8.94513	7.63439	0.05271
shoot control	root NaCl	P	8.94513	10.4911	0.001995
shoot NaCl	root NaCl	P	7.63439	10.4911	0.01095
shoot NaCl	root control	P	7.63439	11.7689	0.002182
root control	root NaCl	P	11.7689	10.4911	0.007594
shoot control	root control	Zn	0.0966352	0.401393	0.00116
shoot control	shoot NaCl	Zn	0.0966352	0.0752	0.05255
shoot control	root NaCl	Zn	0.0966352	0.217126	0.04961
shoot NaCl	root NaCl	Zn	0.0752	0.217126	0.03681
shoot NaCl	root control	Zn	0.0752	0.401393	0.001228
root control	root NaCl	Zn	0.401393	0.217126	0.01048

## Sheet: S3
S3 Solute Concentration ANOVAs
aov(formula = concentration ~ treatment * tissue)
Proline (mg/g)	Df	Sum Sq	Mean Sq	F value	Pr(>F)
treatment	1	475.8	475.8	592.099	<2e-16	***
tissue	1	0.4	0.4	0.438	0.513
treatment:tissue	1	0.8	0.8	0.934	0.341
Residuals	32	25.7	0.8
$treatment	diff	lwr	upr	p adj
salt-control	7.27108	6.66242	7.87975	0
$tissue	diff	lwr	upr	p adj
shoot-root	-0.197779	-0.806445	0.410886	0.512787
$`treatment:tissue`	diff	lwr	upr	p adj
salt:root-control:root	7.55985	6.41491	8.7048	0
control:shoot-control:root	0.0909912	-1.05395	1.23593	0.9964
salt:shoot-control:root	7.0733	5.92836	8.21824	0
control:shoot-salt:root	-7.46886	-8.6138	-6.32392	0
salt:shoot-salt:root	-0.48655	-1.63149	0.658393	0.661077
salt:shoot-control:shoot	6.98231	5.83737	8.12725	0
Calcium (mg/g)	Df	Sum Sq	Mean Sq	F value	Pr(>F)
treatment	1	163	163	81.24	1.83e-05	***
tissue	1	4511	4511	2250.46	4.31e-11	***
treatment:tissue	1	107	107	53.61	8.21e-05	***
Residuals	8	16	2
$treatment	diff	lwr	upr	p adj
salt-control	-7.36778	-9.25281	-5.48276	1.83e-05
$tissue	diff	lwr	upr	p adj
shoot-root	38.7787	36.8936	40.6637	0
$`treatment:tissue`	diff	lwr	upr	p adj
salt:root-control:root	-1.38264	-5.08468	2.3194	0.645868
control:shoot-control:root	44.7638	41.0618	48.4658	0
salt:shoot-control:root	31.4109	27.7088	35.1129	0
control:shoot-salt:root	46.1465	42.4444	49.8485	0
salt:shoot-salt:root	32.7935	29.0915	36.4956	0
salt:shoot-control:shoot	-13.3529	-17.055	-9.65088	1.34e-05
Iron (mg/g)	Df	Sum Sq	Mean Sq	F value	Pr(>F)
treatment	1	0.449	0.449	43.48	0.000171	***
tissue	1	6.51	6.51	630.35	6.78e-09	***
treatment:tissue	1	0.34	0.34	32.91	0.000435	***
Residuals	8	0.083	0.01
$treatment	diff	lwr	upr	p adj
salt-control	-0.386859	-0.522158	-0.251561	0.0001705
$tissue	diff	lwr	upr	p adj
shoot-root	-1.47307	-1.60837	-1.33777	0
$`treatment:tissue`	diff	lwr	upr	p adj
salt:root-control:root	-0.723462	-0.989178	-0.457747	0.0001083
control:shoot-control:root	-1.80967	-2.07539	-1.54396	1e-07
salt:shoot-control:root	-1.85993	-2.12564	-1.59421	1e-07
control:shoot-salt:root	-1.08621	-1.35192	-0.820493	5.2e-06
salt:shoot-salt:root	-1.13647	-1.40218	-0.87075	3.7e-06
salt:shoot-control:shoot	-0.0502564	-0.315972	0.215459	0.927434
Potassium (mg/g)	Df	Sum Sq	Mean Sq	F value	Pr(>F)
treatment	1	844.8	844.8	52.16	9.05e-05	***
tissue	1	1598.6	1598.6	98.69	8.92e-06	***
treatment:tissue	1	842.9	842.9	52.04	9.12e-05	***
Residuals	8	129.6	16.2
$treatment	diff	lwr	upr	p adj
salt-control	-16.7811	-22.1395	-11.4228	9.05e-05
$tissue	diff	lwr	upr	p adj
shoot-root	-23.0836	-28.442	-17.7253	8.9e-06
$`treatment:tissue`	diff	lwr	upr	p adj
salt:root-control:root	-33.5434	-44.0667	-23.02	3.4e-05
control:shoot-control:root	-39.8459	-50.3693	-29.3225	9.3e-06
salt:shoot-control:root	-39.8648	-50.3882	-29.3414	9.3e-06
control:shoot-salt:root	-6.3025	-16.8259	4.2209	0.293312
salt:shoot-salt:root	-6.3214	-16.8448	4.202	0.291181
salt:shoot-control:shoot	-0.0189058	-10.5423	10.5045	1
Magnesium (mg/g)	Df	Sum Sq	Mean Sq	F value	Pr(>F)
treatment	1	4.86	4.86	20.511	0.00193	**
tissue	1	32.95	32.95	139.009	2.45e-06	***
treatment:tissue	1	0.85	0.85	3.565	0.09569	.
Residuals	8	1.9	0.24
$treatment	diff	lwr	upr	p adj
salt-control	-1.2731	-1.92133	-0.624876	0.0019271
$tissue	diff	lwr	upr	p adj
shoot-root	3.31426	2.66604	3.96249	2.5e-06
$`treatment:tissue`	diff	lwr	upr	p adj
salt:root-control:root	-0.74232	-2.01538	0.530744	0.31259
control:shoot-control:root	3.84504	2.57198	5.11811	5.06e-05
salt:shoot-control:root	2.04116	0.768097	3.31422	0.0039298
control:shoot-salt:root	4.58736	3.3143	5.86043	1.35e-05
salt:shoot-salt:root	2.78348	1.51042	4.05654	0.0005131
salt:shoot-control:shoot	-1.80388	-3.07695	-0.53082	0.0082361
Manganese (mg/g)	Df	Sum Sq	Mean Sq	F value	Pr(>F)
treatment	1	0.12134	0.12134	4.752	0.0609	.
tissue	1	0.15202	0.15202	5.954	0.0406	*
treatment:tissue	1	0.06107	0.06107	2.392	0.1605
Residuals	8	0.20425	0.02553
$treatment	diff	lwr	upr	p adj
salt-control	-0.201113	-0.413849	0.0116222	0.0608604
$tissue	diff	lwr	upr	p adj
shoot-root	-0.225107	-0.437843	-0.0123719	0.0405574
$`treatment:tissue`	diff	lwr	upr	p adj
salt:root-control:root	-0.343791	-0.761587	0.0740044	0.111281
control:shoot-control:root	-0.367786	-0.785581	0.0500103	0.0858906
salt:shoot-control:root	-0.426221	-0.844017	-0.00842496	0.0456618
control:shoot-salt:root	-0.0239941	-0.44179	0.393802	0.997606
salt:shoot-salt:root	-0.0824294	-0.500225	0.335366	0.918886
salt:shoot-control:shoot	-0.0584353	-0.476231	0.359361	0.968193
Sodium (mg/g)	Df	Sum Sq	Mean Sq	F value	Pr(>F)
treatment	1	1595.1	1595.1	61.732	4.97e-05	***
tissue	1	0	0	0.001	0.976
treatment:tissue	1	0	0	0	0.998
Residuals	8	206.7	25.8
$treatment	diff	lwr	upr	p adj
salt-control	23.0584	16.2908	29.8261	4.97e-05
$tissue	diff	lwr	upr	p adj
shoot-root	0.0927231	-6.67489	6.86034	0.975569
$`treatment:tissue`	diff	lwr	upr	p adj
salt:root-control:root	23.0515	9.76046	36.3426	0.0023995
control:shoot-control:root	0.0857963	-13.2053	13.3769	0.999996
salt:shoot-control:root	23.1512	9.86011	36.4422	0.0023342
control:shoot-salt:root	-22.9657	-36.2568	-9.67466	0.0024572
salt:shoot-salt:root	0.09965	-13.1914	13.3907	0.999995
salt:shoot-control:shoot	23.0654	9.77431	36.3564	0.0023903
Phosphorous	Df	Sum Sq	Mean Sq	F value	Pr(>F)
treatment	1	5.026	5.026	33.311	0.000419	***
tissue	1	24.201	24.201	160.407	1.42e-06	***
treatment:tissue	1	0.001	0.001	0.005	0.943369
Residuals	8	1.207	0.151
$treatment	diff	lwr	upr	p adj
salt-control	-1.2943	-1.81144	-0.77717	0.0004185
$tissue	diff	lwr	upr	p adj
shoot-root	-2.84024	-3.35737	-2.3231	1.4e-06
$`treatment:tissue`	diff	lwr	upr	p adj
salt:root-control:root	-1.27787	-2.29348	-0.262256	0.0160131
control:shoot-control:root	-2.8238	-3.83941	-1.80819	9.3e-05
salt:shoot-control:root	-4.13454	-5.15015	-3.11893	5.4e-06
control:shoot-salt:root	-1.54593	-2.56155	-0.530324	0.0053942
salt:shoot-salt:root	-2.85668	-3.87229	-1.84107	8.54e-05
salt:shoot-control:shoot	-1.31074	-2.32635	-0.295131	0.0139483
Zinc	Df	Sum Sq	Mean Sq	F value	Pr(>F)
treatment	1	0.03174	0.03174	35.32	0.000345	***
tissue	1	0.14965	0.14965	166.55	1.23e-06	***
treatment:tissue	1	0.01989	0.01989	22.13	0.001533	**
Residuals	8	0.00719	0.0009
$treatment	diff	lwr	upr	p adj
salt-control	-0.102851	-0.142759	-0.0629429	0.0003447
$tissue	diff	lwr	upr	p adj
shoot-root	-0.223342	-0.26325	-0.183434	1.2e-06
$`treatment:tissue`	diff	lwr	upr	p adj
salt:root-control:root	-0.184267	-0.262643	-0.105891	0.0003093
control:shoot-control:root	-0.304758	-0.383135	-0.226382	7.6e-06
salt:shoot-control:root	-0.326193	-0.40457	-0.247817	4.6e-06
control:shoot-salt:root	-0.120491	-0.198868	-0.0421147	0.0050809
salt:shoot-salt:root	-0.141926	-0.220303	-0.0635499	0.0018173
salt:shoot-control:shoot	-0.0214351	-0.0998116	0.0569413	0.817265

## Sheet: S4
S4 Reactivity ANOVAs
aov(formula = average ~ treatment * tissue, data = data)
Whole Transcript	Df	Sum Sq	Mean Sq	F value	Pr(>F)
treatment	1	0.21	0.21	58.64	1.93e-14	***
tissue	1	43.57	43.57	12025.6	0	***
treatment:tissue	1	0.94	0.94	259.3	3.37288e-58	***
Residuals	51908	188.05	0
$treatment	diff	lwr	upr	p adj
salt-control	0.00404585	0.00301031	0.00508139	0
$tissue	diff	lwr	upr	p adj
root-shoot	-0.0579392	-0.0589748	-0.0569037	0
$`treatment:tissue`	diff	lwr	upr	p adj
salt:shoot-control:shoot	-0.00446202	-0.00638159	-0.00254246	0
control:root-control:shoot	-0.0664471	-0.0683667	-0.0645276	0
salt:root-control:shoot	-0.0538934	-0.055813	-0.0519738	0
control:root-salt:shoot	-0.0619851	-0.0639047	-0.0600655	0
salt:root-salt:shoot	-0.0494314	-0.0513509	-0.0475118	0
salt:root-control:root	0.0125537	0.0106342	0.0144733	0
Five Prime UTR	Df	Sum Sq	Mean Sq	F value	Pr(>F)
treatment	1	0	0.017	1.543	0.214
tissue	1	10	9.969	886.692	4.33755e-193	***
treatment:tissue	1	0.4	0.449	39.97	2.6e-10	***
Residuals	48232	542.3	0.011
$treatment	diff	lwr	upr	p adj
salt-control	-0.00119958	-0.00309205	0.00069289	0.214103
$tissue	diff	lwr	upr	p adj
root-shoot	-0.0287519	-0.0306444	-0.0268595	0
$`treatment:tissue`	diff	lwr	upr	p adj
salt:shoot-control:shoot	-0.00731606	-0.0108259	-0.00380627	5e-07
control:root-control:shoot	-0.0348561	-0.0383641	-0.0313482	0
salt:root-control:shoot	-0.0299633	-0.0334717	-0.0264549	0
control:root-salt:shoot	-0.0275401	-0.0310478	-0.0240324	0
salt:root-salt:shoot	-0.0226473	-0.0261554	-0.0191391	0
salt:root-control:root	0.00489283	0.00138653	0.00839913	0.0019136
CDS	Df	Sum Sq	Mean Sq	F value	Pr(>F)
treatment	1	0.27	0.27	51.79	6.26e-13	***
tissue	1	59.86	59.86	11346.1	0	***
treatment:tissue	1	1.93	1.93	365.29	3.79815e-81	***
Residuals	51470	271.54	0.01
$treatment	diff	lwr	upr	p adj
salt-control	0.00460789	0.00335295	0.00586283	0
$tissue	diff	lwr	upr	p adj
root-shoot	-0.0682024	-0.0694573	-0.0669474	0
$`treatment:tissue`	diff	lwr	upr	p adj
salt:shoot-control:shoot	-0.00762964	-0.00995591	-0.00530337	0
control:root-control:shoot	-0.0804404	-0.0827667	-0.0781141	0
salt:root-control:shoot	-0.0635949	-0.0659212	-0.0612687	0
control:root-salt:shoot	-0.0728107	-0.075137	-0.0704845	0
salt:root-salt:shoot	-0.0559653	-0.0582915	-0.0536391	0
salt:root-control:root	0.0168454	0.0145191	0.0191717	0
Three Prime UTR	Df	Sum Sq	Mean Sq	F value	Pr(>F)
treatment	1	0.3	0.305	49.55	1.96e-12	***
tissue	1	13.81	13.811	2244.92	0	***
treatment:tissue	1	0.54	0.541	87.91	7.14155e-21	***
Residuals	48371	297.57	0.006
$treatment	diff	lwr	upr	p adj
salt-control	0.00502067	0.00362278	0.00641856	0
$tissue	diff	lwr	upr	p adj
root-shoot	-0.0337927	-0.0351906	-0.0323948	0
$`treatment:tissue`	diff	lwr	upr	p adj
salt:shoot-control:shoot	0.011615	0.00902208	0.0142079	0
control:root-control:shoot	-0.0271101	-0.0297005	-0.0245196	0
salt:root-control:shoot	-0.0288694	-0.0314646	-0.0262743	0
control:root-salt:shoot	-0.0387251	-0.0413124	-0.0361377	0
salt:root-salt:shoot	-0.0404844	-0.0430765	-0.0378923	0
salt:root-control:root	-0.00175935	-0.00434898	0.000830284	0.300178
aov(formula = average ~ treatment * tissue * feature,data = combined_data)
All Transcript Regions	Df	Sum Sq	Mean Sq	F value	Pr(>F)	F
treatment	1	0.3	0.31	40.97	1.55e-10	***
tissue	1	72.3	72.27	9628.93	0	***
feature	2	604.6	302.31	40278.6	0	***
treatment:tissue	1	0.6	0.61	81.09	2.18365e-19	***
treatment:feature	2	0.3	0.14	19.23	4.44356e-09	***
tissue:feature	2	11.6	5.8	772.88	0	***
treatment:tissue:feature	2	2.3	1.15	153.74	2.0042e-67	***
Residuals	148073	1111.4	0.01
$treatment	diff	lwr	upr	p adj
salt-control	0.00288213	0.00199963	0.00376463	0
$tissue	diff	lwr	upr	p adj
root-shoot	-0.044183	-0.0450655	-0.0433005	0
$feature	diff	lwr	upr	p adj
CDS-FPUTR	0.105749	0.104462	0.107036	0
TPUTR-FPUTR	-0.0454761	-0.0467826	-0.0441696	0
TPUTR-CDS	-0.151225	-0.152511	-0.149939	0
$`treatment:tissue`	diff	lwr	upr	p adj
salt:shoot-control:shoot	-0.00122166	-0.00285815	0.000414818	0.220449
control:root-control:shoot	-0.0482368	-0.0498725	-0.0466011	0
salt:root-control:shoot	-0.0413493	-0.0429861	-0.0397126	0
control:root-salt:shoot	-0.0470151	-0.0486502	-0.0453801	0
salt:root-salt:shoot	-0.0401277	-0.0417637	-0.0384916	0
salt:root-control:root	0.00688747	0.0052522	0.00852275	0
$`treatment:feature`	diff	lwr	upr	p adj
salt:FPUTR-control:FPUTR	-0.00116355	-0.00341176	0.00108466	0.680444
control:CDS-control:FPUTR	0.102839	0.100626	0.105051	0
salt:CDS-control:FPUTR	0.107496	0.105283	0.109708	0
control:TPUTR-control:FPUTR	-0.0485233	-0.0507696	-0.0462771	0
salt:TPUTR-control:FPUTR	-0.043591	-0.0458379	-0.041344	0
control:CDS-salt:FPUTR	0.104002	0.101789	0.106215	0
salt:CDS-salt:FPUTR	0.108659	0.106447	0.110872	0
control:TPUTR-salt:FPUTR	-0.0473598	-0.049606	-0.0451135	0
salt:TPUTR-salt:FPUTR	-0.0424274	-0.0446744	-0.0401804	0
salt:CDS-control:CDS	0.00465711	0.00248076	0.00683346	0
control:TPUTR-control:CDS	-0.151362	-0.153572	-0.149151	0
salt:TPUTR-control:CDS	-0.146429	-0.148641	-0.144218	0
control:TPUTR-salt:CDS	-0.156019	-0.15823	-0.153808	0
salt:TPUTR-salt:CDS	-0.151087	-0.153298	-0.148875	0
salt:TPUTR-control:TPUTR	0.00493239	0.00268741	0.00717736	0
$`tissue:feature`	diff	lwr	upr	p adj
root:FPUTR-shoot:FPUTR	-0.0287544	-0.0310026	-0.0265062	0
shoot:CDS-shoot:FPUTR	0.125482	0.123269	0.127695	0
root:CDS-shoot:FPUTR	0.0572767	0.0550636	0.0594898	0
shoot:TPUTR-shoot:FPUTR	-0.0429557	-0.0452036	-0.0407078	0
root:TPUTR-shoot:FPUTR	-0.0767486	-0.0789951	-0.0745022	0
shoot:CDS-root:FPUTR	0.154236	0.152024	0.156448	0
root:CDS-root:FPUTR	0.0860311	0.0838191	0.0882431	0
shoot:TPUTR-root:FPUTR	-0.0142013	-0.0164481	-0.0119546	0
root:TPUTR-root:FPUTR	-0.0479942	-0.0502396	-0.0457489	0
root:CDS-shoot:CDS	-0.0682051	-0.0703815	-0.0660288	0
shoot:TPUTR-shoot:CDS	-0.168438	-0.170649	-0.166226	0
root:TPUTR-shoot:CDS	-0.20223	-0.204441	-0.20002	0
shoot:TPUTR-root:CDS	-0.100232	-0.102444	-0.0980208	0
root:TPUTR-root:CDS	-0.134025	-0.136236	-0.131815	0
root:TPUTR-shoot:TPUTR	-0.0337929	-0.0360379	-0.0315479	0
$`treatment:tissue:feature`	diff	lwr	upr	p adj
salt:shoot:FPUTR-control:shoot:FPUTR	-0.00731606	-0.010964	-0.0036681	0
control:root:FPUTR-control:shoot:FPUTR	-0.0348561	-0.0385022	-0.0312101	0
salt:root:FPUTR-control:shoot:FPUTR	-0.0299633	-0.0336098	-0.0263168	0
control:shoot:CDS-control:shoot:FPUTR	0.125638	0.122049	0.129228	0
salt:shoot:CDS-control:shoot:FPUTR	0.118009	0.114419	0.121598	0
control:root:CDS-control:shoot:FPUTR	0.0451979	0.0416084	0.0487873	0
salt:root:CDS-control:shoot:FPUTR	0.0620433	0.0584539	0.0656327	0
control:shoot:TPUTR-control:shoot:FPUTR	-0.0524276	-0.0560755	-0.0487797	0
salt:shoot:TPUTR-control:shoot:FPUTR	-0.0408127	-0.0444562	-0.0371691	0
control:root:TPUTR-control:shoot:FPUTR	-0.0795377	-0.0831779	-0.0758976	0
salt:root:TPUTR-control:shoot:FPUTR	-0.0812971	-0.0849438	-0.0776503	0
control:root:FPUTR-salt:shoot:FPUTR	-0.0275401	-0.0311859	-0.0238943	0
salt:root:FPUTR-salt:shoot:FPUTR	-0.0226473	-0.0262935	-0.019001	0
control:shoot:CDS-salt:shoot:FPUTR	0.132954	0.129365	0.136543	0
salt:shoot:CDS-salt:shoot:FPUTR	0.125325	0.121736	0.128914	0
control:root:CDS-salt:shoot:FPUTR	0.0525139	0.0489248	0.0561031	0
salt:root:CDS-salt:shoot:FPUTR	0.0693594	0.0657703	0.0729484	0
control:shoot:TPUTR-salt:shoot:FPUTR	-0.0451116	-0.0487592	-0.041464	0
salt:shoot:TPUTR-salt:shoot:FPUTR	-0.0334966	-0.0371399	-0.0298533	0
control:root:TPUTR-salt:shoot:FPUTR	-0.0722217	-0.0758615	-0.0685818	0
salt:root:TPUTR-salt:shoot:FPUTR	-0.073981	-0.0776275	-0.0703346	0
salt:root:FPUTR-control:root:FPUTR	0.00489283	0.0012485	0.00853717	0.0007027
control:shoot:CDS-control:root:FPUTR	0.160494	0.156907	0.164082	0
salt:shoot:CDS-control:root:FPUTR	0.152865	0.149278	0.156452	0
control:root:CDS-control:root:FPUTR	0.080054	0.0764668	0.0836413	0
salt:root:CDS-control:root:FPUTR	0.0968994	0.0933123	0.100487	0
control:shoot:TPUTR-control:root:FPUTR	-0.0175715	-0.0212172	-0.0139258	0
salt:shoot:TPUTR-control:root:FPUTR	-0.00595651	-0.0095979	-0.00231511	5.9e-06
control:root:TPUTR-control:root:FPUTR	-0.0446816	-0.0483195	-0.0410436	0
salt:root:TPUTR-control:root:FPUTR	-0.0464409	-0.0500855	-0.0427964	0
control:shoot:CDS-salt:root:FPUTR	0.155602	0.152014	0.159189	0
salt:shoot:CDS-salt:root:FPUTR	0.147972	0.144384	0.15156	0
control:root:CDS-salt:root:FPUTR	0.0751612	0.0715735	0.0787489	0
salt:root:CDS-salt:root:FPUTR	0.0920066	0.088419	0.0955942	0
control:shoot:TPUTR-salt:root:FPUTR	-0.0224643	-0.0261105	-0.0188182	0
salt:shoot:TPUTR-salt:root:FPUTR	-0.0108493	-0.0144912	-0.00720749	0
control:root:TPUTR-salt:root:FPUTR	-0.0495744	-0.0532128	-0.045936	0
salt:root:TPUTR-salt:root:FPUTR	-0.0513338	-0.0549788	-0.0476887	0
salt:shoot:CDS-control:shoot:CDS	-0.00762964	-0.0111592	-0.00410004	0
control:root:CDS-control:shoot:CDS	-0.0804404	-0.08397	-0.0769107	0
salt:root:CDS-control:shoot:CDS	-0.0635949	-0.0671246	-0.0600653	0
control:shoot:TPUTR-control:shoot:CDS	-0.178066	-0.181655	-0.174477	0
salt:shoot:TPUTR-control:shoot:CDS	-0.166451	-0.170036	-0.162866	0
control:root:TPUTR-control:shoot:CDS	-0.205176	-0.208757	-0.201595	0
salt:root:TPUTR-control:shoot:CDS	-0.206935	-0.210523	-0.203347	0
control:root:CDS-salt:shoot:CDS	-0.0728107	-0.0763403	-0.0692811	0
salt:root:CDS-salt:shoot:CDS	-0.0559653	-0.0594948	-0.0524358	0
control:shoot:TPUTR-salt:shoot:CDS	-0.170436	-0.174025	-0.166847	0
salt:shoot:TPUTR-salt:shoot:CDS	-0.158821	-0.162406	-0.155237	0
control:root:TPUTR-salt:shoot:CDS	-0.197546	-0.201127	-0.193965	0
salt:root:TPUTR-salt:shoot:CDS	-0.199306	-0.202894	-0.195718	0
salt:root:CDS-control:root:CDS	0.0168454	0.0133158	0.020375	0
control:shoot:TPUTR-control:root:CDS	-0.0976255	-0.101215	-0.0940364	0
salt:shoot:TPUTR-control:root:CDS	-0.0860105	-0.0895952	-0.0824258	0
control:root:TPUTR-control:root:CDS	-0.124736	-0.128317	-0.121154	0
salt:root:TPUTR-control:root:CDS	-0.126495	-0.130083	-0.122907	0
control:shoot:TPUTR-salt:root:CDS	-0.114471	-0.11806	-0.110882	0
salt:shoot:TPUTR-salt:root:CDS	-0.102856	-0.106441	-0.0992713	0
control:root:TPUTR-salt:root:CDS	-0.141581	-0.145162	-0.138	0
salt:root:TPUTR-salt:root:CDS	-0.14334	-0.146928	-0.139753	0
salt:shoot:TPUTR-control:shoot:TPUTR	0.011615	0.00797176	0.0152582	0
control:root:TPUTR-control:shoot:TPUTR	-0.0271101	-0.0307499	-0.0234703	0
salt:root:TPUTR-control:shoot:TPUTR	-0.0288694	-0.0325158	-0.0252231	0
control:root:TPUTR-salt:shoot:TPUTR	-0.0387251	-0.0423605	-0.0350896	0
salt:root:TPUTR-salt:shoot:TPUTR	-0.0404844	-0.0441265	-0.0368423	0
salt:root:TPUTR-control:root:TPUTR	-0.00175935	-0.00539798	0.00187929	0.916557

## Sheet: S5
S5 Tissue Specific Comparisons
S5A Tissue Specific Comparisons, Inherit from Transcript
Tissue	Type	Condition	Statistic	Mean, Shared	Mean, Unique	# Shared	# Unique	p
Shoot	Transcript	Control	Mean	0.277206	0.267443	12971	2904	< 2.2e-16
		Control	Gini	0.673545	0.690585	12971	2904	< 2.2e-16
		Salt	Mean	0.272761	0.267194	12971	2904	1.791e-05
		Salt	Gini	0.686591	0.708896	12971	2904	< 2.2e-16
		Control∩Salt	∆ Mean	-0.00444413	-0.000248645	12971	2904	1.365e-10
		Control∩Salt	Abs ∆ Mean	0.0185168	0.022892	12971	2904	< 2.2e-16
		Control∩Salt	∆ Gini	0.0130467	0.0183103	12971	2904	< 2.2e-16
		Control∩Salt	Abs ∆ Gini	0.0213873	0.0288675	12971	2904	< 2.2e-16
	5’UTR	Control	Mean	0.192553	0.186723	11998	2437	0.0221
		Control	Gini	0.749662	0.76209	11998	2437	6.599e-07
		Salt	Mean	0.185363	0.18387	11998	2437	0.5773
		Salt	Gini	0.761649	0.773306	11998	2437	2.535e-06
		Control∩Salt	∆ Mean	-0.00719011	-0.00285347	11998	2437	0.001829
		Control∩Salt	Abs ∆ Mean	0.0391838	0.0450674	11998	2437	3.021e-09
		Control∩Salt	∆ Gini	0.0119869	0.0112156	11998	2437	0.6029
		Control∩Salt	Abs ∆ Gini	0.0458374	0.0512485	11998	2437	7.491e-08
	CDS	Control	Mean	0.317933	0.302855	12862	2857	< 2.2e-16
		Control	Gini	0.629791	0.652417	12862	2857	< 2.2e-16
		Salt	Mean	0.310334	0.300364	12862	2857	6.036e-10
		Salt	Gini	0.648256	0.676413	12862	2857	< 2.2e-16
		Control∩Salt	∆ Mean	-0.00759878	-0.00249164	12862	2857	3.767e-10
		Control∩Salt	Abs ∆ Mean	0.024387	0.0281924	12862	2857	9.492e-11
		Control∩Salt	∆ Gini	0.0184647	0.0239957	12862	2857	3.131e-14
		Control∩Salt	Abs ∆ Gini	0.0269526	0.0341822	12862	2857	< 2.2e-16
	3’UTR	Control	Mean	0.140786	0.132048	11951	2442	3.586e-06
		Control	Gini	0.810685	0.824429	11951	2442	2.427e-11
		Salt	Mean	0.153108	0.147384	11951	2442	0.007084
		Salt	Gini	0.79871	0.816372	11951	2442	< 2.2e-16
		Control∩Salt	∆ Mean	0.0123226	-0.00249164	11951	2442	< 2.2e-16
		Control∩Salt	Abs ∆ Mean	0.0283861	0.0281924	11951	2442	0.746
		Control∩Salt	∆ Gini	-0.0119746	-0.00805625	11951	2442	0.0004006
		Control∩Salt	Abs ∆ Gini	0.0368646	0.0385844	11951	2442	0.01909
Root	Transcript	Control	Mean	0.277301	0.253228	12971	2754	< 2.2e-16
		Control	Gini	0.674427	0.714248	12971	2754	< 2.2e-16
		Salt	Mean	0.296613	0.267781	12971	2754	< 2.2e-16
		Salt	Gini	0.682314	0.719346	12971	2754	< 2.2e-16
		Control∩Salt	∆ Mean	0.0193115	0.0145535	12971	2754	4.783e-09
		Control∩Salt	Abs ∆ Mean	0.0248775	0.0278422	12971	2754	6.909e-06
		Control∩Salt	∆ Gini	0.00788706	0.00509797	12971	2754	1.827e-05
		Control∩Salt	Abs ∆ Gini	0.0178355	0.0249527	12971	2754	< 2.2e-16
	5’UTR	Control	Mean	0.208744	0.201689	12032	2302	0.01809
		Control	Gini	0.737057	0.757959	12032	2302	7.594e-15
		Salt	Mean	0.21824	0.218541	12032	2302	0.933
		Salt	Gini	0.750105	0.759841	12032	2302	0.0004141
		Control∩Salt	∆ Mean	0.00949652	0.0168511	12032	2302	8.484e-05
		Control∩Salt	Abs ∆ Mean	0.047934	0.0578271	12032	2302	2.512e-12
		Control∩Salt	∆ Gini	0.0130479	0.00188192	12032	2302	8.524e-11
		Control∩Salt	Abs ∆ Gini	0.0488778	0.0577409	12032	2302	1.19e-14
	CDS	Control	Mean	0.312586	0.281844	12862	2708	< 2.2e-16
		Control	Gini	0.636156	0.684023	12862	2708	< 2.2e-16
		Salt	Mean	0.338215	0.299523	12862	2708	< 2.2e-16
		Salt	Gini	0.641349	0.687716	12862	2708	< 2.2e-16
		Control∩Salt	∆ Mean	0.0256282	0.0176792	12862	2708	2.74e-15
		Control∩Salt	Abs ∆ Mean	0.0327525	0.0342294	12862	2708	0.0676
		Control∩Salt	∆ Gini	0.00519247	0.00369249	12862	2708	0.04115
		Control∩Salt	Abs ∆ Gini	0.0205885	0.0274367	12862	2708	< 2.2e-16
	3’UTR	Control	Mean	0.152907	0.127563	11995	2218	< 2.2e-16
		Control	Gini	0.800077	0.836617	11995	2218	< 2.2e-16
		Salt	Mean	0.1503	0.121682	11995	2218	< 2.2e-16
		Salt	Gini	0.817483	0.853173	11995	2218	< 2.2e-16
		Control∩Salt	∆ Mean	-0.00260672	-0.00588097	11995	2218	0.0007326
		Control∩Salt	Abs ∆ Mean	0.0308338	0.031358	11995	2218	0.4249
		Control∩Salt	∆ Gini	0.0174064	0.0165563	11995	2218	0.4614
		Control∩Salt	Abs ∆ Gini	0.0389789	0.0405047	11995	2218	0.05163
S5B Tissue Specific Comparisons, Directly Compared
Tissue	Type	Condition	Statistic	Mean, Shared	Mean, Unique	# Shared	# Unique	p
Shoot	Transcript	Control	Mean	0.277206	0.267443	12971	2904	< 2.2e-16
		Control	Gini	0.673545	0.690585	12971	2904	< 2.2e-16
		Salt	Mean	0.272761	0.267194	12971	2904	1.791e-05
		Salt	Gini	0.686591	0.708896	12971	2904	< 2.2e-16
		Control∩Salt	∆ Mean	-0.00444413	-0.000248645	12971	2904	1.365e-10
		Control∩Salt	Abs ∆ Mean	0.0185168	0.022892	12971	2904	< 2.2e-16
		Control∩Salt	∆ Gini	0.0130467	0.0183103	12971	2904	< 2.2e-16
		Control∩Salt	Abs ∆ Gini	0.0213873	0.0288675	12971	2904	< 2.2e-16
	5’UTR	Control	Mean	0.193008	0.184635	11954	2481	0.0009559
		Control	Gini	0.749244	0.763885	11954	2481	4.3e-09
		Salt	Mean	0.185803	0.181773	11954	2481	0.1304
		Salt	Gini	0.761222	0.775155	11954	2481	1.692e-08
		Control∩Salt	∆ Mean	-0.00720429	-0.00286202	11954	2481	0.001685
		Control∩Salt	Abs ∆ Mean	0.0392138	0.0448185	11954	2481	1.559e-08
		Control∩Salt	∆ Gini	0.0119784	0.01127	11954	2481	0.6322
		Control∩Salt	Abs ∆ Gini	0.0458083	0.051293	11954	2481	5.722e-08
	CDS	Control	Mean	0.317941	0.302826	12861	2858	< 2.2e-16
		Control	Gini	0.62977	0.652506	12861	2858	< 2.2e-16
		Salt	Mean	0.310349	0.300301	12861	2858	4.517e-10
		Salt	Gini	0.648233	0.676508	12861	2858	< 2.2e-16
		Control∩Salt	∆ Mean	-0.00759158	-0.00252582	12861	2858	5.316e-10
		Control∩Salt	Abs ∆ Mean	0.0243811	0.0282176	12861	2858	6.86e-11
		Control∩Salt	∆ Gini	0.0184631	0.0240013	12861	2858	2.855e-14
		Control∩Salt	Abs ∆ Gini	0.0269516	0.0341842	12861	2858	2.2e-16
	3’UTR	Control	Mean	0.14203	0.126819	11813	2580	3.251e-16
		Control	Gini	0.809301	0.830032	11813	2580	< 2.2e-16
		Salt	Mean	0.154453	0.141534	11813	2580	7.314e-10
		Salt	Gini	0.79717	0.822478	11813	2580	< 2.2e-16
		Control∩Salt	∆ Mean	0.012423	-0.00252582	11813	2580	< 2.2e-16
		Control∩Salt	Abs ∆ Mean	0.0285229	0.0282176	11813	2580	0.6102
		Control∩Salt	∆ Gini	-0.0121302	-0.0075537	11813	2580	2.127e-05
		Control∩Salt	Abs ∆ Gini	0.036948	0.0381109	11813	2580	0.1041
Root	Transcript	Control	Mean	0.277301	0.253228	12971	2754	< 2.2e-16
		Control	Gini	0.674427	0.714248	12971	2754	< 2.2e-16
		Salt	Mean	0.296613	0.267781	12971	2754	< 2.2e-16
		Salt	Gini	0.682314	0.719346	12971	2754	< 2.2e-16
		Control∩Salt	∆ Mean	0.0193115	0.0145535	12971	2754	4.783e-09
		Control∩Salt	Abs ∆ Mean	0.0248775	0.0278422	12971	2754	6.909e-06
		Control∩Salt	∆ Gini	0.00788706	0.00509797	12971	2754	1.827e-05
		Control∩Salt	Abs ∆ Gini	0.0178355	0.0249527	12971	2754	< 2.2e-16
	5’UTR	Control	Mean	0.209629	0.197474	11954	2380	3.756e-05
		Control	Gini	0.736164	0.761761	11954	2380	< 2.2e-16
		Salt	Mean	0.219222	0.213597	11954	2380	0.1105
		Salt	Gini	0.749164	0.764248	11954	2380	3.82e-08
		Control∩Salt	∆ Mean	0.00959349	0.016123	11954	2380	0.0003548
		Control∩Salt	Abs ∆ Mean	0.0480104	0.0571193	11954	2380	3.969e-11
		Control∩Salt	∆ Gini	0.0130004	0.00248654	11954	2380	4.964e-10
		Control∩Salt	Abs ∆ Gini	0.0488664	0.0575074	11954	2380	2.096e-14
	CDS	Control	Mean	0.312609	0.281749	12861	2709	< 2.2e-16
		Control	Gini	0.636132	0.68412	12861	2709	< 2.2e-16
		Salt	Mean	0.338236	0.299438	12861	2709	< 2.2e-16
		Salt	Gini	0.641328	0.687796	12861	2709	< 2.2e-16
		Control∩Salt	∆ Mean	0.0256266	0.0176896	12861	2709	2.963e-15
		Control∩Salt	Abs ∆ Mean	0.0327515	0.0342338	12861	2709	0.06651
		Control∩Salt	∆ Gini	0.00519618	0.00367541	12861	2709	0.03841
		Control∩Salt	Abs ∆ Gini	0.0205868	0.0274423	12861	2709	< 2.2e-16
	3’UTR	Control	Mean	0.154681	0.120749	11813	2400	< 2.2e-16
		Control	Gini	0.798056	0.843792	11813	2400	< 2.2e-16
		Salt	Mean	0.152079	0.115096	11813	2400	< 2.2e-16
		Salt	Gini	0.815535	0.860056	11813	2400	< 2.2e-16
		Control∩Salt	∆ Mean	-0.00260267	-0.00565264	11813	2400	0.0008826
		Control∩Salt	Abs ∆ Mean	0.031055	0.0302295	11813	2400	0.1869
		Control∩Salt	∆ Gini	0.0174789	0.0162643	11813	2400	0.2717
		Control∩Salt	Abs ∆ Gini	0.0391177	0.0397061	11813	2400	0.4358

## Sheet: S6
S6 Abundance Change Relationships						Fisher Z-Test Results for Pearson Correlations (p-values)
S6A ∆ Mean Reactvity vs. ∆ Abundance				Pearson Correlation		Shoot Control x Shoot Salt				Root Control x Root Salt
Sample A	Sample B	Region	n	r	p	whole	5’UTR	CDS	3’UTR	whole	5’UTR	CDS	3’UTR
Shoot Control	Shoot Salt	whole	15875	-0.731397	< 2.2e-16	1	0	0	0	0	0	0	0
		5'UTR	14435	-0.289273	< 2.2e-16	0	1	0	0	0	0	0	0
		CDS	15719	-0.678789	< 2.2e-16	0	0	1	0	0	0	0	0
		3'UTR	14393	-0.177102	< 2.2e-16	0	0	0	1	0	0.1238	0	0
Root Control	Root Salt	whole	15725	-0.583744	< 2.2e-16	0	0	0	0	1	0	0	0
		5'UTR	14334	-0.159454	< 2.2e-16	0	0	0	0.1238	0	1	0	0
		CDS	15570	-0.545559	< 2.2e-16	0	0	0	0	0	0	1	0
		3'UTR	14213	-0.0990653	< 2.2e-16	0	0	0	0	0	0	0	1
						Fisher Z-Test Results for Pearson Correlations (p-values)
S6B Shared vs. Tissue Specific Transcripts, ∆ Mean Reactivity vs. ∆ Abundance				Pearson Correlation		All Shoot				All Root				Shared Shoot				Shared Root				Unique Shoot				Unique Root
Tissue	Region	Class	n	r	p	whole	5’UTR	CDS	3’UTR	whole	5’UTR	CDS	3’UTR	whole	5’UTR	CDS	3’UTR	whole	5’UTR	CDS	3’UTR	whole	5’UTR	CDS	3’UTR	whole	5’UTR	CDS	3’UTR
Shoot	Whole	All	15875	-0.731397	< 2.2e-16	1	0	0	0	0	0	0	0	0	0	0	0	0	0	0	0	0	0	0.0024	0	0	0	0	0
	5’UTR	All	14435	-0.289273	< 2.2e-16	0	1	0	0	0	0	0	0	0	0.0549	0	0	0	0	0	0	0	0.0011	0	0.0004	0	0.0049	0	0
	CDS	All	15719	-0.678789	< 2.2e-16	0	0	1	0	0	0	0	0	0	0	0	0	0	0	0	0	0	0	0	0	0.1623	0	0.0384	0
	3’UTR	All	14393	-0.177102	< 2.2e-16	0	0	0	1	0	0.1238	0	0	0	0	0	0.2574	0	0.0008	0	0	0	0	0	0.0623	0	0.0133	0	0.3201
Root	Whole	All	15725	-0.583744	< 2.2e-16	0	0	0	0	1	0	0	0	0	0	0	0	0	0	0	0	0	0	0	0	0	0	0	0
	5’UTR	All	14334	-0.159454	< 2.2e-16	0	0	0	0.1238	0	1	0	0	0	0	0	0.7379	0	0.0607	0	0	0	0	0	0.0071	0	0.001	0	0.8427
	CDS	All	15570	-0.545559	< 2.2e-16	0	0	0	0	0	0	1	0	0	0	0	0	0.2255	0	0	0	0	0	0	0	0	0	0	0
	3’UTR	All	14213	-0.0990653	< 2.2e-16	0	0	0	0	0	0	0	1	0	0	0	0	0	0.002	0	0.1274	0	0	0	0	0	0	0	0.0127
Shoot	Whole	Shared	12971	-0.706668	< 2.2e-16	0	0	0	0	0	0	0	0	1	0	0	0	0	0	0	0	0	0	0	0	0.0001	0	0	0
	5’UTR	Shared	11998	-0.267393	< 2.2e-16	0	0.0549	0	0	0	0	0	0	0	1	0	0	0	0	0	0	0	0	0	0.0146	0	0.0829	0	0
	CDS	Shared	12862	-0.647668	< 2.2e-16	0	0	0	0	0	0	0	0	0	0	1	0	0	0	0	0	0	0	0	0	0.2034	0	0.555	0
	3’UTR	Shared	11951	-0.163492	< 2.2e-16	0	0	0	0.2574	0	0.7379	0	0	0	0	0	1	0	0.0343	0	0	0	0	0	0.0136	0	0.0022	0	0.7076
Root	Whole	Shared	12971	-0.535358	< 2.2e-16	0	0	0	0	0	0	0.2255	0	0	0	0	0	1	0	0	0	0	0	0	0	0	0	0	0
	5’UTR	Shared	12032	-0.136771	< 2.2e-16	0	0	0	0.0008	0	0.0607	0	0.002	0	0	0	0.0343	0	1	0	0	0	0	0	0.0002	0	0	0	0.4196
	CDS	Shared	12862	-0.490187	< 2.2e-16	0	0	0	0	0	0	0	0	0	0	0	0	0	0	1	0	0	0	0	0	0	0	0	0
	3’UTR	Shared	11995	-0.0803173	< 2.2e-16	0	0	0	0	0	0	0	0.1274	0	0	0	0	0	0	0	1	0	0	0	0	0	0	0	0.001
Shoot	Whole	Unique	2904	-0.789722	< 2.2e-16	0	0	0	0	0	0	0	0	0	0	0	0	0	0	0	0	1	0	0.0034	0	0	0	0	0
	5’UTR	Unique	2437	-0.353165	< 2.2e-16	0	0.0011	0	0	0	0	0	0	0	0	0	0	0	0	0	0	0	1	0	0	0	0	0	0
	CDS	Unique	2857	-0.758803	< 2.2e-16	0.0024	0	0	0	0	0	0	0	0	0	0	0	0	0	0	0	0.0034	0	1	0	0	0	0	0
	3’UTR	Unique	2442	-0.216337	< 2.2e-16	0	0.0004	0	0.0623	0	0.0071	0	0	0	0.0146	0	0.0136	0	0.0002	0	0	0	0	0	1	0	0.6114	0	0.0305
Root	Whole	Unique	2754	-0.66291	< 2.2e-16	0	0	0.1623	0	0	0	0	0	0.0001	0	0.2034	0	0	0	0	0	0	0	0	0	1	0	0.5992	0
	5’UTR	Unique	2302	-0.230369	< 2.2e-16	0	0.0049	0	0.0133	0	0.001	0	0	0	0.0829	0	0.0022	0	0	0	0	0	0	0	0.6114	0	1	0	0.0086
	CDS	Unique	2708	-0.654857	< 2.2e-16	0	0	0.0384	0	0	0	0	0	0	0	0.555	0	0	0	0	0	0	0	0	0	0.5992	0	1	0
	3’UTR	Unique	2218	-0.155035	2.108e-13	0	0	0	0.3201	0	0.8427	0	0.0127	0	0	0	0.7076	0	0.4196	0	0.001	0	0	0	0.0305	0	0.0086	0	1
S6C ∆ Mean Reactvity vs. ∆ Mean Reactvity by Region
Sample A	Sample B	Region 1	Region 2	n	r	p
Shoot Control	Shoot Salt	5'UTR	CDS	14431	0.15611	< 2.2e-16
		3'UTR	CDS	14392	0.0631785	3.293e-14
		5'UTR	3'UTR	13535	-0.00154309	0.8575
Root Control	Root Salt	5'UTR	CDS	14330	0.118083	< 2.2e-16
		3'UTR	CDS	14213	-0.00194353	0.8168
		5'UTR	3'UTR	13418	-0.0223883	0.009502
S6D ∆ Mean Reactvity vs. ∆ Abundance by Region, Fully Concordant
Sample A	Sample B	∆ Reactivity	n	r	p
Shoot Control	Shoot Salt	whole	3155	-0.820615	< 2.2e-16
		5'UTR	3155	-0.578201	< 2.2e-16
		CDS	3155	-0.811301	< 2.2e-16
		3'UTR	3155	-0.552608	< 2.2e-16
Root Control	Root Salt	whole	3175	-0.651155	< 2.2e-16
		5'UTR	3175	-0.427768	< 2.2e-16
		CDS	3175	-0.625155	< 2.2e-16
		3'UTR	3175	-0.408257	< 2.2e-16
									Fisher Z-Test Results for Pearson Correlations (p-values)
									Shoot 5’UTR x CDS				Shoot 3’UTR x CDS				Shoot 5’UTR x 3’UTR				Root 5’UTR x CDS				Root 3’UTR x CDS				Root 5’UTR x 3’UTR
S6E ∆ Mean Reactvity vs. ∆ Abundance by Region with Concordance							Pearson Correlation		5’UTR	CDS	5’UTR	CDS	3’UTR	CDS	3’UTR	CDS	5’UTR	3’UTR	5’UTR	3’UTR	5’UTR	CDS	5’UTR	CDS	3’UTR	CDS	3’UTR	CDS	5’UTR	3’UTR	5’UTR	3’UTR
Sample A	Sample B	Region 1	Region 2	Concordance	∆ Reactivity	n	r	p	Concordant	Concordant	Discordant	Discordant	Concordant	Concordant	Discordant	Discordant	Concordant	Concordant	Discordant	Discordant	Concordant	Concordant	Discordant	Discordant	Concordant	Concordant	Discordant	Discordant	Concordant	Concordant	Discordant	Discordant
Shoot Control	Shoot Salt	5'UTR	CDS	Concordant	5'UTR	7769	-0.507891	< 2.2e-16	1	0	0	0.0082	0.0684	0	0	0	0	0	0	0	0	0	0	0.2277	0	0	0	0.8141	0	0	0	0
		5'UTR	CDS	Concordant	CDS	7769	-0.754771	< 2.2e-16	0	1	0	0	0	0.0798	0	0	0	0	0	0	0	0	0	0	0	0	0	0	0	0	0	0
		5'UTR	CDS	Discordant	5'UTR	6656	0.152208	< 2.2e-16	0	0	1	0	0	0	0.5093	0	0	0	0	0	0	0	0.0014	0	0	0	0.0103	0	0	0	0	0
		5'UTR	CDS	Discordant	CDS	6656	-0.539901	< 2.2e-16	0.0082	0	0	1	0	0	0	0	0	0	0	0	0	0.1295	0	0.1614	0	0	0	0.0164	0	0	0	0
		3'UTR	CDS	Concordant	3'UTR	6634	-0.484929	< 2.2e-16	0.0684	0	0	0	1	0	0	0	0	0	0	0	0	0	0	0.0034	0	0	0	0.0416	0	0	0	0
		3'UTR	CDS	Concordant	CDS	6634	-0.741883	< 2.2e-16	0	0.0798	0	0	0	1	0	0	0	0	0	0	0	0	0	0	0	0	0	0	0	0	0	0
		3'UTR	CDS	Discordant	3'UTR	7754	0.162965	< 2.2e-16	0	0	0.5093	0	0	0	1	0	0	0	0	0	0	0	0.0078	0	0	0	0.0471	0	0	0	0	0
		3'UTR	CDS	Discordant	CDS	7754	-0.609253	< 2.2e-16	0	0	0	0	0	0	0	1	0	0	0	0	0	0	0	0	0	0.2101	0	0	0	0	0	0
		5'UTR	3'UTR	Concordant	5'UTR	6290	-0.375127	< 2.2e-16	0	0	0	0	0	0	0	0	1	0.025	0	0	0.4353	0	0	0	0.0298	0	0	0	0	0	0	0
		5'UTR	3'UTR	Concordant	3'UTR	6290	-0.340278	< 2.2e-16	0	0	0	0	0	0	0	0	0.025	1	0	0	0.0018	0	0	0	0	0	0	0	0	0	0	0
		5'UTR	3'UTR	Discordant	5'UTR	7238	-0.212894	< 2.2e-16	0	0	0	0	0	0	0	0	0	0	1	0	0	0	0	0	0	0	0	0	0.5651	0.0013	0	0
		5'UTR	3'UTR	Discordant	3'UTR	7238	-0.0271039	0.02111	0	0	0	0	0	0	0	0	0	0	0	1	0	0	0	0	0	0	0	0	0	0	0	0.4398
Root Control	Root Salt	5'UTR	CDS	Concordant	5'UTR	7492	-0.386537	< 2.2e-16	0	0	0	0	0	0	0	0	0.4353	0.0018	0	0	1	0	0	0	0.1399	0	0	0	0	0	0	0
		5'UTR	CDS	Concordant	CDS	7492	-0.557746	< 2.2e-16	0	0	0	0.1295	0	0	0	0	0	0	0	0	0	1	0	0.003	0	0.0007	0	0.0001	0	0	0	0
		5'UTR	CDS	Discordant	5'UTR	6837	0.205605	< 2.2e-16	0	0	0.0014	0	0	0	0.0078	0	0	0	0	0	0	0	1	0	0	0	0.4699	0	0	0	0	0
		5'UTR	CDS	Discordant	CDS	6837	-0.522588	< 2.2e-16	0.2277	0	0	0.1614	0.0034	0	0	0	0	0	0	0	0	0.003	0	1	0	0	0	0.3313	0	0	0	0
		3'UTR	CDS	Concordant	3'UTR	6640	-0.407501	< 2.2e-16	0	0	0	0	0	0	0	0	0.0298	0	0	0	0.1399	0	0	0	1	0	0	0	0	0	0	0
		3'UTR	CDS	Concordant	CDS	6640	-0.595905	< 2.2e-16	0	0	0	0	0	0	0	0.2101	0	0	0	0	0	0.0007	0	0	0	1	0	0	0	0	0	0
		3'UTR	CDS	Discordant	3'UTR	7569	0.194026	< 2.2e-16	0	0	0.0103	0	0	0	0.0471	0	0	0	0	0	0	0	0.4699	0	0	0	1	0	0	0	0	0
		3'UTR	CDS	Discordant	CDS	7569	-0.510704	< 2.2e-16	0.8141	0	0	0.0164	0.0416	0	0	0	0	0	0	0	0	0.0001	0	0.3313	0	0	0	1	0	0	0	0
		5'UTR	3'UTR	Concordant	5'UTR	6434	-0.203463	< 2.2e-16	0	0	0	0	0	0	0	0	0	0	0.5651	0	0	0	0	0	0	0	0	0	1	0.01	0	0
		5'UTR	3'UTR	Concordant	3'UTR	6434	-0.159559	< 2.2e-16	0	0	0	0	0	0	0	0	0	0	0.0013	0	0	0	0	0	0	0	0	0	0.01	1	0.0266	0
		5'UTR	3'UTR	Discordant	5'UTR	6982	-0.121991	< 2.2e-16	0	0	0	0	0	0	0	0	0	0	0	0	0	0	0	0	0	0	0	0	0	0.0266	1	0
		5'UTR	3'UTR	Discordant	3'UTR	6982	-0.040052	0.0008157	0	0	0	0	0	0	0	0	0	0	0	0.4398	0	0	0	0	0	0	0	0	0	0	0	1

## Sheet: S7
S7 Concordant Transcripts
Shoot	Root	Shared	Mutually Concordant
AT1G01020.2	AT1G01010.1	AT1G01300.1	AT1G01300.1
AT1G01050.1	AT1G01040.1	AT1G01430.1	AT1G01430.1
AT1G01140.1	AT1G01090.1	AT1G01630.1	AT1G01630.1
AT1G01140.2	AT1G01100.1	AT1G02280.1	AT1G02280.1
AT1G01140.3	AT1G01100.2	AT1G02280.2	AT1G02280.2
AT1G01240.1	AT1G01100.3	AT1G02780.1	AT1G02780.1
AT1G01240.2	AT1G01100.4	AT1G02840.1	AT1G02840.1
AT1G01300.1	AT1G01160.1	AT1G02840.2	AT1G02840.2
AT1G01360.1	AT1G01160.2	AT1G02840.3	AT1G02840.3
AT1G01430.1	AT1G01240.3	AT1G02890.1	AT1G02890.1
AT1G01470.1	AT1G01300.1	AT1G02890.2	AT1G02890.2
AT1G01550.1	AT1G01430.1	AT1G02990.1	AT1G05460.1
AT1G01550.2	AT1G01620.1	AT1G03280.1	AT1G07250.1
AT1G01630.1	AT1G01620.2	AT1G03820.1	AT1G09200.1
AT1G01830.1	AT1G01630.1	AT1G04340.1	AT1G09690.1
AT1G01830.2	AT1G01730.1	AT1G04820.1	AT1G11530.1
AT1G01830.3	AT1G01930.1	AT1G04830.1	AT1G12580.1
AT1G01910.1	AT1G01950.1	AT1G05460.1	AT1G12930.1
AT1G01910.2	AT1G01950.2	AT1G06200.1	AT1G14810.1
AT1G01910.4	AT1G01950.3	AT1G06640.3	AT1G15270.1
AT1G01920.2	AT1G02090.3	AT1G07170.3	AT1G15690.1
AT1G01940.1	AT1G02280.1	AT1G07250.1	AT1G16000.1
AT1G02090.1	AT1G02280.2	AT1G07590.1	AT1G17340.1
AT1G02205.1	AT1G02500.1	AT1G07830.1	AT1G17550.1
AT1G02205.2	AT1G02640.1	AT1G07960.1	AT1G19350.1
AT1G02205.3	AT1G02690.1	AT1G07960.3	AT1G20010.1
AT1G02280.1	AT1G02690.2	AT1G08000.1	AT1G20980.1
AT1G02280.2	AT1G02780.1	AT1G08530.1	AT1G21680.1
AT1G02305.1	AT1G02840.1	AT1G08600.1	AT1G22780.1
AT1G02330.1	AT1G02840.2	AT1G08600.4	AT1G24575.1
AT1G02335.1	AT1G02840.3	AT1G08970.2	AT1G26880.1
AT1G02560.1	AT1G02860.1	AT1G08970.4	AT1G26880.2
AT1G02780.1	AT1G02860.2	AT1G09100.1	AT1G26910.1
AT1G02840.1	AT1G02890.1	AT1G09200.1	AT1G28330.1
AT1G02840.2	AT1G02890.2	AT1G09690.1	AT1G28330.2
AT1G02840.3	AT1G02920.1	AT1G10865.1	AT1G28395.1
AT1G02890.1	AT1G02950.1	AT1G11530.1	AT1G28395.2
AT1G02890.2	AT1G02950.2	AT1G12580.1	AT1G29320.1
AT1G02930.1	AT1G02950.3	AT1G12850.1	AT1G34370.2
AT1G02990.1	AT1G02950.4	AT1G12910.1	AT1G35680.1
AT1G03040.1	AT1G02960.1	AT1G12930.1	AT1G45000.1
AT1G03040.2	AT1G02960.2	AT1G13320.2	AT1G45000.2
AT1G03130.1	AT1G02960.3	AT1G14620.2	AT1G48450.3
AT1G03280.1	AT1G02990.1	AT1G14810.1	AT1G48480.1
AT1G03290.2	AT1G03280.1	AT1G15270.1	AT1G48830.1
AT1G03350.1	AT1G03430.1	AT1G15690.1	AT1G48830.2
AT1G03365.1	AT1G03820.1	AT1G15970.1	AT1G49300.2
AT1G03380.1	AT1G04040.1	AT1G16000.1	AT1G49760.1
AT1G03630.1	AT1G04140.1	AT1G16890.1	AT1G51060.1
AT1G03630.2	AT1G04140.2	AT1G16890.3	AT1G51700.1
AT1G03680.1	AT1G04200.1	AT1G17340.1	AT1G52300.1
AT1G03760.1	AT1G04250.1	AT1G17550.1	AT1G55020.1
AT1G03820.1	AT1G04270.1	AT1G17580.1	AT1G56600.1
AT1G03870.1	AT1G04270.2	AT1G19350.1	AT1G57720.2
AT1G03900.1	AT1G04340.1	AT1G20010.1	AT1G58080.1
AT1G03970.1	AT1G04510.1	AT1G20980.1	AT1G60010.1
AT1G04290.1	AT1G04510.2	AT1G21680.1	AT1G60170.1
AT1G04300.1	AT1G04530.1	AT1G22360.1	AT1G61340.1
AT1G04300.2	AT1G04750.1	AT1G22360.2	AT1G61340.2
AT1G04300.3	AT1G04750.2	AT1G22450.1	AT1G62380.1
AT1G04300.4	AT1G04820.1	AT1G22620.1	AT1G62510.1
AT1G04340.1	AT1G04830.1	AT1G22780.1	AT1G63640.2
AT1G04350.1	AT1G04850.1	AT1G22882.1	AT1G64390.1
AT1G04440.1	AT1G04870.1	AT1G23440.1	AT1G64600.1
AT1G04480.1	AT1G04870.2	AT1G24050.1	AT1G65930.1
AT1G04820.1	AT1G05260.1	AT1G24575.1	AT1G67700.1
AT1G04830.1	AT1G05350.1	AT1G25055.1	AT1G67700.2
AT1G04950.1	AT1G05410.2	AT1G25570.1	AT1G67700.3
AT1G04950.2	AT1G05460.1	AT1G26880.1	AT1G70060.1
AT1G04950.3	AT1G05470.1	AT1G26880.2	AT1G71860.3
AT1G05150.1	AT1G05710.2	AT1G26910.1	AT1G72160.1
AT1G05180.1	AT1G05710.3	AT1G28330.1	AT1G72320.2
AT1G05180.2	AT1G05710.5	AT1G28330.2	AT1G72320.3
AT1G05180.3	AT1G05830.1	AT1G28395.1	AT1G74910.1
AT1G05190.1	AT1G05830.2	AT1G28395.2	AT1G74910.3
AT1G05430.1	AT1G05840.1	AT1G29320.1	AT1G74940.1
AT1G05460.1	AT1G05870.3	AT1G32130.1	AT1G76680.1
AT1G05780.1	AT1G05870.4	AT1G32230.3	AT1G76680.2
AT1G05790.2	AT1G06110.1	AT1G32410.2	AT1G79380.1
AT1G05870.2	AT1G06130.1	AT1G32410.5	AT1G79880.1
AT1G05910.1	AT1G06130.2	AT1G33520.1	AT1G79880.3
AT1G05940.1	AT1G06149.1	AT1G34370.2	AT1G80380.1
AT1G06010.1	AT1G06200.1	AT1G35680.1	AT1G80380.2
AT1G06190.1	AT1G06220.1	AT1G35720.1	AT2G02130.1
AT1G06190.2	AT1G06220.2	AT1G36160.2	AT2G04350.2
AT1G06200.1	AT1G06390.1	AT1G43700.1	AT2G09990.1
AT1G06210.2	AT1G06390.2	AT1G44900.1	AT2G11520.1
AT1G06360.1	AT1G06640.3	AT1G45000.1	AT2G14720.2
AT1G06420.1	AT1G06850.1	AT1G45000.2	AT2G17350.1
AT1G06420.2	AT1G06850.2	AT1G47270.1	AT2G18050.2
AT1G06640.2	AT1G06960.1	AT1G47270.2	AT2G18160.1
AT1G06640.3	AT1G06960.2	AT1G48450.3	AT2G18230.1
AT1G06680.1	AT1G06960.3	AT1G48480.1	AT2G18750.3
AT1G06690.1	AT1G07040.1	AT1G48830.1	AT2G21380.1
AT1G06700.1	AT1G07170.3	AT1G48830.2	AT2G22100.1
AT1G06700.2	AT1G07200.2	AT1G49300.2	AT2G22270.1
AT1G06720.1	AT1G07240.1	AT1G49760.1	AT2G22970.1
AT1G06790.1	AT1G07250.1	AT1G51060.1	AT2G26600.1
AT1G06900.1	AT1G07320.1	AT1G51160.1	AT2G26600.2
AT1G07000.1	AT1G07320.2	AT1G51160.2	AT2G29540.1
AT1G07010.2	AT1G07470.1	AT1G51680.1	AT2G30600.1
AT1G07170.1	AT1G07590.1	AT1G51680.3	AT2G30600.2
AT1G07170.3	AT1G07640.2	AT1G51700.1	AT2G30600.3
AT1G07250.1	AT1G07770.1	AT1G52300.1	AT2G30600.4
AT1G07400.1	AT1G07770.2	AT1G53190.1	AT2G30600.5
AT1G07420.1	AT1G07830.1	AT1G53460.1	AT2G30860.2
AT1G07420.2	AT1G07890.1	AT1G53780.1	AT2G31040.1
AT1G07440.1	AT1G07890.6	AT1G53780.3	AT2G31810.1
AT1G07590.1	AT1G07920.1	AT1G54500.1	AT2G31810.2
AT1G07615.1	AT1G07940.2	AT1G54610.2	AT2G31810.3
AT1G07640.1	AT1G07960.1	AT1G54610.3	AT2G34690.1
AT1G07780.1	AT1G07960.2	AT1G54630.1	AT2G34730.2
AT1G07780.3	AT1G07960.3	AT1G54630.2	AT2G36230.1
AT1G07780.4	AT1G08000.1	AT1G55020.1	AT2G37470.1
AT1G07830.1	AT1G08160.1	AT1G55450.1	AT2G37710.1
AT1G07960.1	AT1G08180.1	AT1G55450.2	AT2G39570.1
AT1G07960.3	AT1G08320.1	AT1G56190.1	AT2G39700.1
AT1G07990.1	AT1G08320.3	AT1G56280.1	AT2G39770.1
AT1G08000.1	AT1G08410.1	AT1G56280.2	AT2G41430.2
AT1G08000.2	AT1G08470.1	AT1G56600.1	AT2G41680.1
AT1G08125.2	AT1G08480.1	AT1G56610.3	AT2G42710.1
AT1G08125.3	AT1G08530.1	AT1G57720.2	AT2G43400.1
AT1G08420.1	AT1G08600.1	AT1G58080.1	AT2G43820.1
AT1G08420.2	AT1G08600.3	AT1G60010.1	AT2G43910.1
AT1G08465.1	AT1G08600.4	AT1G60170.1	AT2G45920.1
AT1G08520.1	AT1G08710.1	AT1G61340.1	AT2G46220.1
AT1G08530.1	AT1G08760.1	AT1G61340.2	AT2G46505.1
AT1G08570.1	AT1G08970.1	AT1G61870.1	AT3G01850.2
AT1G08570.2	AT1G08970.2	AT1G62045.1	AT3G02065.3
AT1G08570.3	AT1G08970.3	AT1G62380.1	AT3G02080.1
AT1G08570.4	AT1G08970.4	AT1G62510.1	AT3G02120.1
AT1G08600.1	AT1G09010.1	AT1G63640.2	AT3G02540.2
AT1G08600.4	AT1G09070.1	AT1G64090.2	AT3G03270.2
AT1G08650.1	AT1G09100.1	AT1G64330.1	AT3G04730.1
AT1G08720.1	AT1G09140.1	AT1G64390.1	AT3G05380.1
AT1G08780.1	AT1G09140.2	AT1G64600.1	AT3G05380.2
AT1G08930.1	AT1G09200.1	AT1G65660.1	AT3G05380.3
AT1G08930.2	AT1G09270.1	AT1G65930.1	AT3G05380.4
AT1G08970.2	AT1G09270.2	AT1G65980.1	AT3G05380.5
AT1G08970.4	AT1G09290.1	AT1G66070.2	AT3G05710.1
AT1G09060.1	AT1G09300.2	AT1G66160.1	AT3G05710.2
AT1G09060.2	AT1G09310.1	AT1G66160.2	AT3G06080.1
AT1G09100.1	AT1G09620.1	AT1G66410.2	AT3G06080.2
AT1G09130.2	AT1G09640.1	AT1G67700.1	AT3G06500.1
AT1G09150.1	AT1G09640.2	AT1G67700.2	AT3G07540.1
AT1G09160.2	AT1G09690.1	AT1G67700.3	AT3G09830.1
AT1G09200.1	AT1G09840.1	AT1G67800.3	AT3G09860.1
AT1G09340.1	AT1G09932.1	AT1G70060.1	AT3G09890.1
AT1G09430.1	AT1G09940.1	AT1G70280.1	AT3G10120.1
AT1G09470.2	AT1G09970.1	AT1G71220.1	AT3G10610.1
AT1G09590.1	AT1G09970.2	AT1G71220.2	AT3G11400.1
AT1G09690.1	AT1G10020.1	AT1G71730.1	AT3G11400.2
AT1G09740.1	AT1G10270.1	AT1G71860.3	AT3G13310.1
AT1G09750.1	AT1G10310.1	AT1G71865.1	AT3G14240.1
AT1G09780.1	AT1G10500.1	AT1G72160.1	AT3G14400.1
AT1G09830.1	AT1G10530.1	AT1G72320.2	AT3G14870.2
AT1G09850.1	AT1G10580.1	AT1G72320.3	AT3G14870.3
AT1G10410.1	AT1G10610.1	AT1G73350.2	AT3G15360.1
AT1G10450.1	AT1G10650.1	AT1G73440.1	AT3G15450.1
AT1G10760.1	AT1G10650.2	AT1G74910.1	AT3G15450.2
AT1G10865.1	AT1G10700.1	AT1G74910.3	AT3G15450.3
AT1G10900.1	AT1G10820.1	AT1G74940.1	AT3G15630.1
AT1G11170.1	AT1G10865.1	AT1G76380.1	AT3G15950.1
AT1G11260.1	AT1G10865.2	AT1G76380.2	AT3G15950.2
AT1G11280.2	AT1G11000.1	AT1G76380.3	AT3G16420.1
AT1G11280.3	AT1G11020.1	AT1G76680.1	AT3G16420.2
AT1G11330.1	AT1G11210.1	AT1G76680.2	AT3G16420.3
AT1G11330.2	AT1G11450.1	AT1G78880.1	AT3G16720.1
AT1G11360.2	AT1G11475.1	AT1G78920.1	AT3G16770.1
AT1G11360.3	AT1G11530.1	AT1G79230.2	AT3G16940.1
AT1G11380.1	AT1G11680.1	AT1G79380.1	AT3G17590.1
AT1G11430.1	AT1G11840.5	AT1G79430.1	AT3G18050.1
AT1G11530.1	AT1G12010.1	AT1G79660.1	AT3G19080.1
AT1G11790.1	AT1G12080.1	AT1G79880.1	AT3G19990.1
AT1G11820.2	AT1G12080.2	AT1G79880.3	AT3G20650.1
AT1G11850.3	AT1G12240.1	AT1G80380.1	AT3G20650.2
AT1G11860.1	AT1G12580.1	AT1G80380.2	AT3G22320.1
AT1G11860.2	AT1G12850.1	AT1G80610.1	AT3G22990.1
AT1G11870.1	AT1G12910.1	AT1G80620.1	AT3G25470.1
AT1G11870.2	AT1G12930.1	AT2G01410.1	AT3G25940.1
AT1G12020.1	AT1G12970.1	AT2G02130.1	AT3G26510.1
AT1G12090.1	AT1G13030.1	AT2G04350.2	AT3G26510.5
AT1G12120.1	AT1G13245.1	AT2G09990.1	AT3G26744.2
AT1G12140.2	AT1G13320.1	AT2G11520.1	AT3G30300.1
AT1G12310.1	AT1G13320.2	AT2G14720.2	AT3G44720.1
AT1G12360.1	AT1G13340.1	AT2G16440.1	AT3G45240.1
AT1G12410.1	AT1G13430.1	AT2G16510.1	AT3G45240.3
AT1G12470.1	AT1G13560.1	AT2G17350.1	AT3G46010.1
AT1G12580.1	AT1G13560.2	AT2G18050.2	AT3G50950.1
AT1G12750.1	AT1G13590.1	AT2G18110.1	AT3G52060.1
AT1G12800.1	AT1G13640.1	AT2G18160.1	AT3G52060.2
AT1G12850.1	AT1G13730.1	AT2G18230.1	AT3G52140.1
AT1G12860.1	AT1G13740.1	AT2G18750.3	AT3G52140.2
AT1G12880.1	AT1G13930.1	AT2G18840.1	AT3G52140.3
AT1G12900.1	AT1G13930.2	AT2G18960.1	AT3G52140.4
AT1G12910.1	AT1G13930.3	AT2G19950.1	AT3G53990.2
AT1G12920.1	AT1G13950.1	AT2G19950.2	AT3G54880.1
AT1G12930.1	AT1G14060.1	AT2G21380.1	AT3G55470.1
AT1G13210.1	AT1G14300.1	AT2G22100.1	AT3G55750.1
AT1G13250.1	AT1G14300.2	AT2G22270.1	AT3G56170.1
AT1G13320.2	AT1G14360.1	AT2G22970.1	AT3G56910.1
AT1G13470.1	AT1G14450.1	AT2G23370.1	AT3G59350.2
AT1G13820.1	AT1G14510.1	AT2G25670.1	AT3G60210.1
AT1G13870.1	AT1G14620.1	AT2G25670.2	AT3G63180.1
AT1G13960.2	AT1G14620.2	AT2G25850.1	AT4G01550.1
AT1G13990.1	AT1G14630.1	AT2G26460.1	AT4G01550.2
AT1G14250.1	AT1G14810.1	AT2G26600.1	AT4G02350.1
AT1G14270.1	AT1G15000.1	AT2G26600.2	AT4G07990.1
AT1G14270.2	AT1G15040.1	AT2G27350.2	AT4G07990.2
AT1G14270.3	AT1G15040.2	AT2G28450.2	AT4G08390.1
AT1G14270.4	AT1G15060.1	AT2G29200.1	AT4G08390.2
AT1G14400.1	AT1G15100.1	AT2G29540.1	AT4G09000.1
AT1G14400.2	AT1G15110.1	AT2G30600.1	AT4G09000.2
AT1G14410.1	AT1G15120.1	AT2G30600.2	AT4G11740.1
AT1G14610.1	AT1G15270.1	AT2G30600.3	AT4G13830.2
AT1G14620.2	AT1G15310.1	AT2G30600.4	AT4G18240.1
AT1G14690.1	AT1G15380.1	AT2G30600.5	AT4G18950.1
AT1G14690.2	AT1G15380.2	AT2G30860.2	AT4G20380.1
AT1G14720.1	AT1G15400.2	AT2G31040.1	AT4G20380.3
AT1G14810.1	AT1G15550.1	AT2G31810.1	AT4G20380.8
AT1G14830.1	AT1G15690.1	AT2G31810.2	AT4G22140.2
AT1G14880.1	AT1G15690.2	AT2G31810.3	AT4G22780.1
AT1G14910.1	AT1G15810.1	AT2G31880.1	AT4G23680.1
AT1G15020.1	AT1G15930.1	AT2G31955.1	AT4G24620.1
AT1G15270.1	AT1G15930.2	AT2G32950.1	AT4G24620.2
AT1G15400.1	AT1G15970.1	AT2G32980.1	AT4G25610.1
AT1G15690.1	AT1G16000.1	AT2G34690.1	AT4G26060.1
AT1G15750.3	AT1G16060.1	AT2G34730.2	AT4G26555.1
AT1G15880.1	AT1G16060.2	AT2G36230.1	AT4G28830.2
AT1G15950.1	AT1G16170.1	AT2G36580.1	AT4G28880.1
AT1G15950.2	AT1G16240.1	AT2G36900.1	AT4G29960.1
AT1G15970.1	AT1G16240.3	AT2G37040.1	AT4G30220.1
AT1G16000.1	AT1G16470.1	AT2G37170.1	AT4G30690.1
AT1G16180.1	AT1G16470.2	AT2G37470.1	AT4G30690.2
AT1G16180.2	AT1G16700.1	AT2G37710.1	AT4G32350.1
AT1G16260.1	AT1G16840.1	AT2G37990.1	AT4G32420.2
AT1G16260.2	AT1G16840.2	AT2G39450.1	AT4G32610.1
AT1G16410.1	AT1G16840.3	AT2G39570.1	AT4G34590.1
AT1G16410.2	AT1G16890.1	AT2G39700.1	AT4G35100.1
AT1G16680.1	AT1G16890.3	AT2G39770.1	AT4G35100.2
AT1G16890.1	AT1G17110.1	AT2G40765.1	AT4G35300.1
AT1G16890.3	AT1G17220.1	AT2G41430.2	AT4G35300.2
AT1G16920.1	AT1G17340.1	AT2G41680.1	AT4G35770.1
AT1G17130.1	AT1G17510.1	AT2G42490.1	AT4G35770.3
AT1G17130.2	AT1G17550.1	AT2G42570.1	AT4G35785.1
AT1G17140.1	AT1G17580.1	AT2G42710.1	AT4G35785.2
AT1G17140.2	AT1G17730.1	AT2G43400.1	AT4G36690.4
AT1G17280.1	AT1G17760.1	AT2G43820.1	AT4G37920.1
AT1G17280.2	AT1G17860.1	AT2G43910.1	AT4G38770.1
AT1G17340.1	AT1G17890.1	AT2G44160.1	AT4G39350.1
AT1G17420.1	AT1G18030.2	AT2G45640.2	AT5G01210.1
AT1G17440.1	AT1G18160.1	AT2G45720.2	AT5G02290.2
AT1G17440.2	AT1G18270.1	AT2G45820.1	AT5G02380.1
AT1G17530.1	AT1G18270.2	AT2G45920.1	AT5G02620.1
AT1G17550.1	AT1G18270.3	AT2G46220.1	AT5G04430.1
AT1G17580.1	AT1G18300.1	AT2G46280.3	AT5G04430.2
AT1G17690.1	AT1G18370.1	AT2G46505.1	AT5G05590.1
AT1G17720.1	AT1G18450.1	AT3G01130.1	AT5G05590.2
AT1G17720.2	AT1G18490.1	AT3G01590.1	AT5G08590.1
AT1G17970.1	AT1G18630.1	AT3G01590.2	AT5G11340.1
AT1G17980.1	AT1G18850.1	AT3G01670.1	AT5G12040.1
AT1G17980.2	AT1G18880.1	AT3G01850.2	AT5G14200.1
AT1G18000.1	AT1G19000.1	AT3G02065.3	AT5G14200.2
AT1G18070.1	AT1G19000.2	AT3G02080.1	AT5G14200.3
AT1G18070.2	AT1G19120.1	AT3G02120.1	AT5G14270.2
AT1G18070.3	AT1G19130.1	AT3G02190.1	AT5G16470.1
AT1G18170.1	AT1G19180.2	AT3G02420.1	AT5G16550.1
AT1G18210.1	AT1G19350.1	AT3G02540.2	AT5G17070.1
AT1G18250.2	AT1G19580.2	AT3G02600.3	AT5G18590.1
AT1G18540.1	AT1G19870.1	AT3G02700.1	AT5G18590.2
AT1G18650.1	AT1G19910.1	AT3G02750.1	AT5G19390.3
AT1G18660.3	AT1G20010.1	AT3G02750.2	AT5G19770.1
AT1G18700.2	AT1G20450.1	AT3G02750.3	AT5G20250.2
AT1G18730.2	AT1G20450.2	AT3G03160.1	AT5G20250.3
AT1G18730.4	AT1G20620.2	AT3G03270.2	AT5G20250.4
AT1G18840.1	AT1G20850.1	AT3G04730.1	AT5G22320.1
AT1G18840.2	AT1G20920.1	AT3G05380.1	AT5G22320.2
AT1G19010.1	AT1G20920.2	AT3G05380.2	AT5G22330.1
AT1G19020.1	AT1G20980.1	AT3G05380.3	AT5G22880.1
AT1G19300.1	AT1G21190.1	AT3G05380.4	AT5G22920.1
AT1G19350.1	AT1G21370.1	AT3G05380.5	AT5G23740.1
AT1G19350.4	AT1G21580.1	AT3G05710.1	AT5G24060.2
AT1G19370.1	AT1G21610.1	AT3G05710.2	AT5G24780.1
AT1G19520.1	AT1G21610.2	AT3G06080.1	AT5G24780.2
AT1G19720.1	AT1G21610.3	AT3G06080.2	AT5G25754.1
AT1G19800.1	AT1G21660.1	AT3G06500.1	AT5G27740.1
AT1G19800.2	AT1G21680.1	AT3G07540.1	AT5G28020.3
AT1G19800.3	AT1G21720.1	AT3G09150.2	AT5G28020.4
AT1G19835.2	AT1G22030.1	AT3G09735.1	AT5G28020.6
AT1G19880.1	AT1G22190.1	AT3G09830.1	AT5G36290.1
AT1G20010.1	AT1G22270.1	AT3G09860.1	AT5G37850.2
AT1G20100.2	AT1G22300.1	AT3G09890.1	AT5G38480.1
AT1G20330.1	AT1G22300.2	AT3G10030.2	AT5G38480.2
AT1G20510.1	AT1G22300.3	AT3G10070.1	AT5G38720.1
AT1G20575.1	AT1G22360.1	AT3G10120.1	AT5G47640.1
AT1G20610.1	AT1G22360.2	AT3G10610.1	AT5G48500.1
AT1G20840.1	AT1G22410.1	AT3G11400.1	AT5G50740.1
AT1G20950.1	AT1G22450.1	AT3G11400.2	AT5G52410.1
AT1G20980.1	AT1G22620.1	AT3G11910.1	AT5G53450.1
AT1G21130.1	AT1G22640.1	AT3G13310.1	AT5G56680.1
AT1G21130.2	AT1G22710.1	AT3G13580.1	AT5G57630.1
AT1G21160.1	AT1G22780.1	AT3G13860.1	AT5G57685.1
AT1G21390.1	AT1G22882.1	AT3G14240.1	AT5G57900.1
AT1G21500.1	AT1G22910.1	AT3G14290.1	AT5G58490.1
AT1G21560.2	AT1G22920.1	AT3G14400.1	AT5G59950.1
AT1G21630.1	AT1G23205.1	AT3G14870.2	AT5G59950.3
AT1G21640.1	AT1G23390.1	AT3G14870.3	AT5G59950.5
AT1G21640.2	AT1G23440.1	AT3G15352.1	AT5G60570.1
AT1G21680.1	AT1G23710.1	AT3G15360.1	AT5G61310.4
AT1G22160.1	AT1G23800.1	AT3G15450.1	AT5G62550.1
AT1G22200.2	AT1G23820.1	AT3G15450.2	AT5G64240.2
AT1G22360.1	AT1G23820.2	AT3G15450.3	AT5G64343.1
AT1G22360.2	AT1G23970.1	AT3G15630.1	AT5G64680.1
AT1G22450.1	AT1G23970.2	AT3G15950.1	AT5G64680.3
AT1G22530.1	AT1G24050.1	AT3G15950.2	AT5G65220.1
AT1G22620.1	AT1G24120.1	AT3G16420.1	AT5G65910.1
AT1G22700.3	AT1G24190.2	AT3G16420.2	AT5G66210.1
AT1G22780.1	AT1G24350.2	AT3G16420.3	AT5G66210.2
AT1G22790.1	AT1G24350.3	AT3G16720.1	AT5G67290.1
AT1G22790.2	AT1G24575.1	AT3G16770.1	AT5G67500.1
AT1G22840.1	AT1G24793.1	AT3G16940.1	AT5G67500.2
AT1G22840.2	AT1G24793.2	AT3G17590.1
AT1G22882.1	AT1G24800.1	AT3G18050.1
AT1G22885.1	AT1G24880.1	AT3G19080.1
AT1G23130.1	AT1G24881.1	AT3G19420.1
AT1G23260.1	AT1G25054.1	AT3G19990.1
AT1G23440.1	AT1G25054.2	AT3G20470.1
AT1G23870.1	AT1G25055.1	AT3G20650.1
AT1G24050.1	AT1G25275.2	AT3G20650.2
AT1G24160.2	AT1G25370.1	AT3G20800.1
AT1G24240.1	AT1G25510.1	AT3G22320.1
AT1G24350.1	AT1G25550.1	AT3G22430.1
AT1G24490.1	AT1G25570.1	AT3G22890.1
AT1G24490.2	AT1G26250.1	AT3G22990.1
AT1G24575.1	AT1G26270.1	AT3G23070.1
AT1G24880.3	AT1G26450.1	AT3G23530.1
AT1G25055.1	AT1G26665.1	AT3G24070.1
AT1G25220.1	AT1G26665.2	AT3G25040.1
AT1G25280.1	AT1G26880.1	AT3G25470.1
AT1G25280.2	AT1G26880.2	AT3G25940.1
AT1G25560.1	AT1G26910.1	AT3G26510.1
AT1G25570.1	AT1G27130.1	AT3G26510.5
AT1G26090.1	AT1G27210.1	AT3G26744.2
AT1G26290.1	AT1G27310.1	AT3G27460.1
AT1G26340.1	AT1G27330.1	AT3G27460.2
AT1G26440.4	AT1G27380.2	AT3G27520.1
AT1G26470.1	AT1G27390.1	AT3G30300.1
AT1G26830.1	AT1G27400.1	AT3G44600.1
AT1G26880.1	AT1G27450.1	AT3G44720.1
AT1G26880.2	AT1G27450.3	AT3G45240.1
AT1G26910.1	AT1G27510.1	AT3G45240.3
AT1G27000.1	AT1G27530.1	AT3G46010.1
AT1G27100.1	AT1G27620.1	AT3G50370.1
AT1G27300.1	AT1G27730.1	AT3G50700.1
AT1G27350.1	AT1G27930.1	AT3G50740.1
AT1G27630.1	AT1G27970.1	AT3G50950.1
AT1G27695.2	AT1G28060.1	AT3G51040.1
AT1G27752.1	AT1G28110.1	AT3G51500.1
AT1G27752.2	AT1G28240.1	AT3G51630.2
AT1G27760.1	AT1G28290.1	AT3G51790.1
AT1G27760.3	AT1G28290.2	AT3G51940.1
AT1G27770.1	AT1G28330.1	AT3G52060.1
AT1G27770.2	AT1G28330.2	AT3G52060.2
AT1G28330.1	AT1G28330.3	AT3G52140.1
AT1G28330.2	AT1G28330.5	AT3G52140.2
AT1G28370.1	AT1G28350.1	AT3G52140.3
AT1G28395.1	AT1G28380.1	AT3G52140.4
AT1G28395.2	AT1G28395.1	AT3G52230.1
AT1G28600.1	AT1G28395.2	AT3G53420.1
AT1G28610.2	AT1G28490.1	AT3G53420.2
AT1G28960.5	AT1G28540.1	AT3G53990.2
AT1G29040.1	AT1G28580.1	AT3G54030.1
AT1G29040.2	AT1G28580.2	AT3G54880.1
AT1G29040.4	AT1G28680.1	AT3G54890.2
AT1G29320.1	AT1G29030.1	AT3G55470.1
AT1G29350.1	AT1G29260.1	AT3G55750.1
AT1G29370.1	AT1G29270.1	AT3G55850.1
AT1G29910.1	AT1G29320.1	AT3G55850.2
AT1G29951.1	AT1G29330.1	AT3G56170.1
AT1G29952.1	AT1G29400.1	AT3G56910.1
AT1G30090.1	AT1G29400.2	AT3G57785.1
AT1G30110.1	AT1G29900.1	AT3G58030.2
AT1G30110.2	AT1G29940.1	AT3G58460.1
AT1G30210.1	AT1G29950.1	AT3G59350.2
AT1G30210.2	AT1G29990.1	AT3G60210.1
AT1G30230.1	AT1G30130.2	AT3G60250.1
AT1G30260.1	AT1G30400.1	AT3G60250.2
AT1G30270.1	AT1G30460.1	AT3G62840.1
AT1G30320.1	AT1G30510.1	AT3G62840.2
AT1G30330.1	AT1G30510.2	AT3G63180.1
AT1G30330.2	AT1G30620.2	AT3G63240.1
AT1G30380.1	AT1G30630.1	AT3G63530.2
AT1G30680.1	AT1G30720.1	AT4G00090.1
AT1G30820.1	AT1G30755.1	AT4G00440.2
AT1G30970.1	AT1G30880.1	AT4G00440.3
AT1G30970.2	AT1G31050.1	AT4G01550.1
AT1G31170.1	AT1G31360.2	AT4G01550.2
AT1G31330.1	AT1G31710.1	AT4G02350.1
AT1G31440.1	AT1G31730.1	AT4G02530.1
AT1G31650.1	AT1G31770.1	AT4G02570.1
AT1G31810.1	AT1G31812.1	AT4G04925.1
AT1G31850.1	AT1G31970.1	AT4G07990.1
AT1G31850.2	AT1G32050.1	AT4G07990.2
AT1G31850.3	AT1G32090.1	AT4G08390.1
AT1G32060.1	AT1G32130.1	AT4G08390.2
AT1G32070.1	AT1G32150.1	AT4G08690.1
AT1G32070.2	AT1G32210.1	AT4G08690.2
AT1G32070.3	AT1G32230.3	AT4G08900.1
AT1G32130.1	AT1G32400.1	AT4G08960.1
AT1G32130.2	AT1G32410.1	AT4G09000.1
AT1G32160.1	AT1G32410.2	AT4G09000.2
AT1G32170.1	AT1G32410.5	AT4G09150.2
AT1G32200.2	AT1G32450.1	AT4G09570.1
AT1G32230.3	AT1G32580.1	AT4G10180.1
AT1G32340.1	AT1G32700.1	AT4G10610.1
AT1G32410.2	AT1G32700.2	AT4G11220.1
AT1G32410.3	AT1G32920.1	AT4G11740.1
AT1G32410.4	AT1G32990.1	AT4G12340.1
AT1G32410.5	AT1G33120.1	AT4G13520.1
AT1G32470.1	AT1G33230.1	AT4G13640.1
AT1G32640.1	AT1G33265.1	AT4G13830.2
AT1G32870.1	AT1G33480.1	AT4G13930.1
AT1G32870.2	AT1G33520.1	AT4G14160.2
AT1G33050.1	AT1G33810.1	AT4G14710.2
AT1G33170.1	AT1G34030.1	AT4G16447.1
AT1G33290.1	AT1G34150.1	AT4G17100.1
AT1G33360.1	AT1G34370.1	AT4G17650.1
AT1G33470.1	AT1G34370.2	AT4G17730.1
AT1G33490.1	AT1G34370.3	AT4G18040.1
AT1G33520.1	AT1G34430.1	AT4G18240.1
AT1G33700.1	AT1G35160.1	AT4G18950.1
AT1G33700.2	AT1G35160.2	AT4G20380.1
AT1G34320.1	AT1G35580.1	AT4G20380.3
AT1G34370.2	AT1G35580.2	AT4G20380.8
AT1G34380.2	AT1G35680.1	AT4G20880.1
AT1G35230.1	AT1G35720.1	AT4G22140.2
AT1G35620.1	AT1G36160.2	AT4G22285.1
AT1G35680.1	AT1G42960.1	AT4G22780.1
AT1G35720.1	AT1G43130.1	AT4G23680.1
AT1G36160.1	AT1G43670.1	AT4G23885.1
AT1G36160.2	AT1G43700.1	AT4G24330.1
AT1G36280.1	AT1G44170.1	AT4G24620.1
AT1G36280.2	AT1G44800.1	AT4G24620.2
AT1G36310.1	AT1G44835.1	AT4G25360.1
AT1G36380.1	AT1G44835.2	AT4G25360.2
AT1G36390.1	AT1G44900.1	AT4G25610.1
AT1G36390.2	AT1G44900.2	AT4G25740.2
AT1G42430.1	AT1G44970.1	AT4G26060.1
AT1G42440.1	AT1G45000.1	AT4G26555.1
AT1G43170.2	AT1G45000.2	AT4G26650.1
AT1G43170.3	AT1G45249.1	AT4G27000.1
AT1G43580.1	AT1G45249.3	AT4G27380.1
AT1G43700.1	AT1G47270.1	AT4G27900.1
AT1G43850.1	AT1G47270.2	AT4G27900.2
AT1G43860.1	AT1G47278.1	AT4G28600.1
AT1G44760.1	AT1G47278.2	AT4G28830.2
AT1G44770.1	AT1G47380.1	AT4G28880.1
AT1G44770.2	AT1G47420.1	AT4G29960.1
AT1G44900.1	AT1G47530.1	AT4G30220.1
AT1G45000.1	AT1G47640.1	AT4G30690.1
AT1G45000.2	AT1G47870.1	AT4G30690.2
AT1G45050.1	AT1G47900.1	AT4G30820.1
AT1G45201.1	AT1G47900.2	AT4G30820.2
AT1G45201.2	AT1G48140.1	AT4G30820.3
AT1G45230.1	AT1G48140.2	AT4G31790.1
AT1G45230.2	AT1G48300.1	AT4G31860.1
AT1G45332.1	AT1G48320.1	AT4G32350.1
AT1G45688.1	AT1G48410.1	AT4G32420.2
AT1G45688.2	AT1G48410.2	AT4G32470.1
AT1G47200.1	AT1G48450.1	AT4G32470.2
AT1G47250.1	AT1G48450.3	AT4G32610.1
AT1G47270.1	AT1G48480.1	AT4G33580.2
AT1G47270.2	AT1G48598.1	AT4G33680.1
AT1G47330.1	AT1G48600.2	AT4G34590.1
AT1G47490.1	AT1G48610.2	AT4G34640.1
AT1G48210.2	AT1G48630.1	AT4G34660.1
AT1G48350.1	AT1G48635.1	AT4G34660.2
AT1G48450.3	AT1G48635.2	AT4G34881.1
AT1G48480.1	AT1G48830.1	AT4G35100.1
AT1G48520.2	AT1G48830.2	AT4G35100.2
AT1G48520.3	AT1G48900.2	AT4G35220.1
AT1G48610.1	AT1G48920.1	AT4G35300.1
AT1G48650.2	AT1G49050.1	AT4G35300.2
AT1G48830.1	AT1G49050.2	AT4G35770.1
AT1G48830.2	AT1G49240.1	AT4G35770.3
AT1G48860.1	AT1G49300.2	AT4G35785.1
AT1G49300.1	AT1G49500.1	AT4G35785.2
AT1G49300.2	AT1G49570.1	AT4G36690.4
AT1G49400.1	AT1G49760.1	AT4G37460.1
AT1G49470.1	AT1G50010.1	AT4G37920.1
AT1G49540.2	AT1G50430.1	AT4G38080.1
AT1G49560.1	AT1G50430.2	AT4G38550.1
AT1G49720.1	AT1G50500.1	AT4G38710.1
AT1G49760.1	AT1G50500.2	AT4G38710.2
AT1G49760.2	AT1G50510.1	AT4G38770.1
AT1G49950.3	AT1G51060.1	AT4G38800.1
AT1G49970.1	AT1G51160.1	AT4G38810.1
AT1G50140.1	AT1G51160.2	AT4G39350.1
AT1G50140.2	AT1G51540.1	AT4G39800.1
AT1G50440.1	AT1G51630.1	AT5G01210.1
AT1G50440.2	AT1G51680.1	AT5G02290.2
AT1G50570.2	AT1G51680.3	AT5G02380.1
AT1G50640.1	AT1G51700.1	AT5G02502.1
AT1G50670.1	AT1G51730.1	AT5G02620.1
AT1G50732.1	AT1G51740.1	AT5G02960.1
AT1G50840.1	AT1G51745.1	AT5G04430.1
AT1G50920.1	AT1G52070.1	AT5G04430.2
AT1G51060.1	AT1G52240.2	AT5G04740.2
AT1G51140.1	AT1G52300.1	AT5G04760.1
AT1G51160.1	AT1G52360.1	AT5G05590.1
AT1G51160.2	AT1G52380.1	AT5G05590.2
AT1G51500.1	AT1G52720.1	AT5G07350.1
AT1G51590.1	AT1G52910.1	AT5G08060.1
AT1G51590.2	AT1G52980.1	AT5G08100.1
AT1G51680.1	AT1G53000.1	AT5G08570.1
AT1G51680.2	AT1G53030.1	AT5G08590.1
AT1G51680.3	AT1G53190.1	AT5G09400.1
AT1G51690.1	AT1G53430.2	AT5G09440.1
AT1G51690.2	AT1G53460.1	AT5G09461.1
AT1G51700.1	AT1G53635.1	AT5G10010.1
AT1G51720.1	AT1G53645.1	AT5G11340.1
AT1G52190.1	AT1G53780.1	AT5G12040.1
AT1G52230.1	AT1G53780.2	AT5G12150.2
AT1G52300.1	AT1G53780.3	AT5G14200.1
AT1G52370.1	AT1G53785.1	AT5G14200.2
AT1G52370.2	AT1G54000.1	AT5G14200.3
AT1G52400.2	AT1G54080.1	AT5G14270.2
AT1G52540.1	AT1G54080.2	AT5G14550.1
AT1G52710.2	AT1G54150.1	AT5G16470.1
AT1G52760.1	AT1G54340.1	AT5G16550.1
AT1G52930.1	AT1G54390.6	AT5G17070.1
AT1G53160.1	AT1G54500.1	AT5G17160.1
AT1G53165.1	AT1G54510.1	AT5G18590.1
AT1G53165.2	AT1G54510.2	AT5G18590.2
AT1G53165.3	AT1G54510.3	AT5G19390.3
AT1G53170.1	AT1G54520.1	AT5G19660.1
AT1G53190.1	AT1G54610.1	AT5G19750.1
AT1G53190.2	AT1G54610.2	AT5G19770.1
AT1G53210.1	AT1G54610.3	AT5G19930.2
AT1G53230.1	AT1G54630.1	AT5G20250.2
AT1G53310.1	AT1G54630.2	AT5G20250.3
AT1G53310.2	AT1G54690.1	AT5G20250.4
AT1G53310.3	AT1G54770.1	AT5G20950.1
AT1G53460.1	AT1G55020.1	AT5G21020.2
AT1G53480.2	AT1G55080.1	AT5G22320.1
AT1G53720.1	AT1G55090.1	AT5G22320.2
AT1G53760.1	AT1G55110.1	AT5G22330.1
AT1G53780.1	AT1G55450.1	AT5G22880.1
AT1G53780.3	AT1G55450.2	AT5G22920.1
AT1G53800.1	AT1G55460.1	AT5G23740.1
AT1G53800.2	AT1G55750.1	AT5G23750.1
AT1G53850.1	AT1G55920.1	AT5G23750.2
AT1G53850.2	AT1G56140.1	AT5G23820.1
AT1G54040.1	AT1G56170.1	AT5G24060.2
AT1G54100.1	AT1G56180.1	AT5G24780.1
AT1G54100.2	AT1G56190.1	AT5G24780.2
AT1G54290.1	AT1G56220.4	AT5G25754.1
AT1G54350.1	AT1G56280.1	AT5G25890.1
AT1G54500.1	AT1G56280.2	AT5G26940.2
AT1G54570.1	AT1G56340.1	AT5G27400.1
AT1G54610.2	AT1G56340.2	AT5G27740.1
AT1G54610.3	AT1G56460.2	AT5G28020.3
AT1G54630.1	AT1G56600.1	AT5G28020.4
AT1G54630.2	AT1G56610.3	AT5G28020.6
AT1G54780.1	AT1G56700.3	AT5G32440.2
AT1G54850.1	AT1G56720.1	AT5G36290.1
AT1G54990.1	AT1G57540.3	AT5G37780.2
AT1G55020.1	AT1G57720.2	AT5G37780.3
AT1G55210.1	AT1G57820.1	AT5G37850.2
AT1G55350.4	AT1G57820.2	AT5G38480.1
AT1G55350.5	AT1G57990.1	AT5G38480.2
AT1G55450.1	AT1G58030.1	AT5G38720.1
AT1G55450.2	AT1G58080.1	AT5G39850.1
AT1G55480.1	AT1G58100.1	AT5G41600.1
AT1G55490.1	AT1G58100.2	AT5G42190.1
AT1G55490.2	AT1G58180.3	AT5G45800.1
AT1G55670.1	AT1G58370.1	AT5G46150.2
AT1G55690.1	AT1G58440.1	AT5G47220.1
AT1G55690.2	AT1G59870.1	AT5G47640.1
AT1G55690.3	AT1G59980.1	AT5G48500.1
AT1G56050.1	AT1G60010.1	AT5G48655.1
AT1G56090.1	AT1G60170.1	AT5G48655.2
AT1G56190.1	AT1G60650.1	AT5G48960.1
AT1G56190.2	AT1G60650.2	AT5G50370.1
AT1G56280.1	AT1G60740.1	AT5G50740.1
AT1G56280.2	AT1G60860.1	AT5G50840.1
AT1G56290.1	AT1G60950.1	AT5G50840.2
AT1G56423.1	AT1G61170.1	AT5G51140.1
AT1G56500.1	AT1G61240.3	AT5G52410.1
AT1G56560.1	AT1G61250.2	AT5G53450.1
AT1G56600.1	AT1G61340.1	AT5G53530.1
AT1G56610.2	AT1G61340.2	AT5G56680.1
AT1G56610.3	AT1G61690.1	AT5G57630.1
AT1G57720.2	AT1G61740.1	AT5G57655.1
AT1G57770.1	AT1G61870.1	AT5G57685.1
AT1G57860.1	AT1G61890.1	AT5G57900.1
AT1G58060.1	AT1G62045.1	AT5G58030.1
AT1G58080.1	AT1G62330.1	AT5G58070.1
AT1G58180.2	AT1G62380.1	AT5G58490.1
AT1G58180.4	AT1G62480.1	AT5G58720.3
AT1G58200.1	AT1G62510.1	AT5G59420.1
AT1G58200.2	AT1G62660.1	AT5G59950.1
AT1G58380.1	AT1G62770.1	AT5G59950.3
AT1G59840.1	AT1G62800.1	AT5G59950.5
AT1G60010.1	AT1G62800.2	AT5G60120.1
AT1G60070.1	AT1G62840.1	AT5G60120.2
AT1G60070.2	AT1G63010.1	AT5G60570.1
AT1G60140.1	AT1G63110.1	AT5G60790.1
AT1G60170.1	AT1G63500.1	AT5G61170.1
AT1G60420.1	AT1G63640.1	AT5G61310.4
AT1G60770.1	AT1G63640.2	AT5G61420.1
AT1G60780.1	AT1G63660.1	AT5G61530.1
AT1G60850.2	AT1G63660.2	AT5G61530.2
AT1G60940.2	AT1G63940.1	AT5G62550.1
AT1G61010.1	AT1G63940.2	AT5G63800.1
AT1G61040.1	AT1G63940.3	AT5G64240.2
AT1G61340.1	AT1G63940.4	AT5G64343.1
AT1G61340.2	AT1G64090.1	AT5G64680.1
AT1G61660.3	AT1G64090.2	AT5G64680.3
AT1G61660.4	AT1G64330.1	AT5G65220.1
AT1G61850.2	AT1G64370.1	AT5G65480.1
AT1G61870.1	AT1G64385.1	AT5G65910.1
AT1G62045.1	AT1G64390.1	AT5G66210.1
AT1G62300.1	AT1G64400.1	AT5G66210.2
AT1G62380.1	AT1G64440.1	AT5G67250.1
AT1G62500.1	AT1G64450.1	AT5G67290.1
AT1G62510.1	AT1G64510.1	AT5G67500.1
AT1G62640.1	AT1G64550.1	AT5G67500.2
AT1G62640.2	AT1G64600.1
AT1G62750.1	AT1G64650.1
AT1G62850.2	AT1G64700.1
AT1G62850.3	AT1G64720.1
AT1G63000.1	AT1G64750.2
AT1G63640.2	AT1G64880.1
AT1G63780.1	AT1G64980.1
AT1G63800.1	AT1G64990.1
AT1G63830.3	AT1G65030.1
AT1G64090.2	AT1G65220.1
AT1G64142.1	AT1G65270.2
AT1G64330.1	AT1G65270.3
AT1G64350.1	AT1G65440.3
AT1G64360.1	AT1G65470.1
AT1G64380.1	AT1G65660.1
AT1G64390.1	AT1G65930.1
AT1G64520.1	AT1G65980.1
AT1G64600.1	AT1G66070.2
AT1G64640.1	AT1G66150.1
AT1G64660.1	AT1G66160.1
AT1G64670.1	AT1G66160.2
AT1G64740.1	AT1G66230.1
AT1G64750.3	AT1G66410.1
AT1G64850.1	AT1G66410.2
AT1G65295.1	AT1G66510.1
AT1G65430.1	AT1G66510.3
AT1G65590.1	AT1G66680.1
AT1G65660.1	AT1G67090.2
AT1G65800.1	AT1G67170.1
AT1G65820.2	AT1G67300.1
AT1G65820.3	AT1G67300.2
AT1G65930.1	AT1G67350.2
AT1G65960.2	AT1G67700.1
AT1G65980.1	AT1G67700.2
AT1G65980.2	AT1G67700.3
AT1G66070.1	AT1G67720.1
AT1G66070.2	AT1G67730.1
AT1G66100.1	AT1G67750.1
AT1G66160.1	AT1G67800.3
AT1G66160.2	AT1G67940.1
AT1G66180.1	AT1G68020.1
AT1G66200.1	AT1G68020.2
AT1G66200.2	AT1G68100.1
AT1G66260.1	AT1G68238.1
AT1G66260.2	AT1G68260.1
AT1G66330.1	AT1G68310.2
AT1G66410.2	AT1G68400.1
AT1G66430.1	AT1G68440.1
AT1G66480.1	AT1G68500.1
AT1G66590.2	AT1G68580.2
AT1G67280.2	AT1G68690.1
AT1G67350.1	AT1G68720.1
AT1G67590.1	AT1G68760.1
AT1G67590.2	AT1G68920.1
AT1G67680.1	AT1G68920.3
AT1G67700.1	AT1G69010.1
AT1G67700.2	AT1G69310.1
AT1G67700.3	AT1G69310.2
AT1G67800.1	AT1G69410.1
AT1G67800.3	AT1G69460.1
AT1G67800.4	AT1G69490.1
AT1G67860.1	AT1G69780.1
AT1G67870.1	AT1G69830.1
AT1G67970.1	AT1G70060.1
AT1G68010.1	AT1G70280.1
AT1G68010.2	AT1G70340.1
AT1G68160.1	AT1G70480.1
AT1G68190.1	AT1G70580.4
AT1G68530.2	AT1G70660.1
AT1G68590.1	AT1G70660.2
AT1G68590.2	AT1G70690.1
AT1G68790.1	AT1G70750.1
AT1G68810.1	AT1G70890.1
AT1G68910.3	AT1G70940.1
AT1G69040.2	AT1G70950.1
AT1G69220.1	AT1G71220.1
AT1G69220.2	AT1G71220.2
AT1G69230.2	AT1G71270.1
AT1G69295.1	AT1G71360.1
AT1G69420.2	AT1G71730.1
AT1G69510.2	AT1G71820.1
AT1G69530.1	AT1G71820.2
AT1G69530.2	AT1G71860.2
AT1G69530.3	AT1G71860.3
AT1G69530.4	AT1G71865.1
AT1G69530.5	AT1G71880.1
AT1G69740.1	AT1G71920.3
AT1G69840.1	AT1G72010.1
AT1G69840.2	AT1G72160.1
AT1G69840.4	AT1G72310.1
AT1G69840.5	AT1G72320.2
AT1G69840.7	AT1G72320.3
AT1G69870.1	AT1G72370.1
AT1G69900.1	AT1G72370.2
AT1G69935.1	AT1G72390.1
AT1G70060.1	AT1G72480.1
AT1G70090.2	AT1G72700.1
AT1G70190.1	AT1G72710.1
AT1G70280.1	AT1G72730.1
AT1G70280.2	AT1G72820.1
AT1G70310.1	AT1G73180.1
AT1G70370.1	AT1G73230.1
AT1G70370.2	AT1G73330.1
AT1G70410.2	AT1G73350.2
AT1G70410.3	AT1G73440.1
AT1G70420.1	AT1G73490.1
AT1G70520.1	AT1G73490.2
AT1G70620.1	AT1G73590.1
AT1G70620.3	AT1G73620.1
AT1G70730.1	AT1G73670.1
AT1G70760.1	AT1G73820.1
AT1G70782.1	AT1G73940.1
AT1G70790.2	AT1G74060.1
AT1G70830.2	AT1G74230.1
AT1G70900.1	AT1G74260.1
AT1G71020.1	AT1G74458.1
AT1G71020.2	AT1G74560.2
AT1G71080.1	AT1G74560.3
AT1G71220.1	AT1G74660.1
AT1G71220.2	AT1G74720.1
AT1G71430.1	AT1G74740.1
AT1G71480.1	AT1G74910.1
AT1G71695.1	AT1G74910.3
AT1G71730.1	AT1G74940.1
AT1G71850.1	AT1G75130.1
AT1G71860.1	AT1G75335.1
AT1G71860.3	AT1G75370.1
AT1G71865.1	AT1G75410.1
AT1G72070.1	AT1G75410.2
AT1G72160.1	AT1G75680.1
AT1G72320.2	AT1G75750.1
AT1G72320.3	AT1G75780.1
AT1G72520.1	AT1G75810.1
AT1G72645.1	AT1G75840.1
AT1G72690.1	AT1G75860.1
AT1G72750.1	AT1G76090.1
AT1G72770.1	AT1G76140.1
AT1G72770.2	AT1G76240.1
AT1G72770.3	AT1G76300.1
AT1G72910.1	AT1G76380.1
AT1G72930.1	AT1G76380.2
AT1G73350.2	AT1G76380.3
AT1G73390.1	AT1G76680.1
AT1G73390.2	AT1G76680.2
AT1G73390.3	AT1G76700.1
AT1G73390.4	AT1G76850.1
AT1G73440.1	AT1G77145.1
AT1G73470.1	AT1G77260.1
AT1G73470.2	AT1G77380.1
AT1G73470.3	AT1G77510.1
AT1G73655.1	AT1G77660.1
AT1G73660.1	AT1G77690.1
AT1G73760.1	AT1G77710.1
AT1G73840.1	AT1G77760.1
AT1G74090.1	AT1G77840.1
AT1G74340.1	AT1G77855.1
AT1G74510.1	AT1G77930.2
AT1G74510.2	AT1G78000.1
AT1G74520.1	AT1G78000.2
AT1G74690.1	AT1G78150.1
AT1G74840.1	AT1G78150.2
AT1G74840.2	AT1G78260.1
AT1G74880.1	AT1G78380.1
AT1G74910.1	AT1G78430.1
AT1G74910.3	AT1G78510.1
AT1G74940.1	AT1G78570.1
AT1G75040.1	AT1G78680.2
AT1G75190.2	AT1G78780.1
AT1G75270.1	AT1G78780.3
AT1G75500.1	AT1G78870.1
AT1G75500.2	AT1G78870.2
AT1G75560.1	AT1G78880.1
AT1G75630.2	AT1G78920.1
AT1G75660.1	AT1G78920.2
AT1G75690.1	AT1G79210.1
AT1G75750.2	AT1G79210.2
AT1G75800.1	AT1G79210.3
AT1G75950.1	AT1G79230.2
AT1G76010.1	AT1G79230.3
AT1G76100.1	AT1G79260.1
AT1G76270.1	AT1G79310.1
AT1G76360.1	AT1G79350.1
AT1G76380.1	AT1G79380.1
AT1G76380.2	AT1G79430.1
AT1G76380.3	AT1G79650.1
AT1G76450.1	AT1G79650.2
AT1G76510.1	AT1G79650.4
AT1G76540.1	AT1G79660.1
AT1G76560.1	AT1G79690.1
AT1G76670.1	AT1G79880.1
AT1G76680.1	AT1G79880.3
AT1G76680.2	AT1G79930.1
AT1G76710.1	AT1G80230.1
AT1G76710.2	AT1G80260.1
AT1G76810.1	AT1G80380.1
AT1G76820.1	AT1G80380.2
AT1G76930.1	AT1G80380.3
AT1G76960.1	AT1G80460.1
AT1G76990.4	AT1G80460.2
AT1G77122.1	AT1G80610.1
AT1G77180.3	AT1G80620.1
AT1G77300.1	AT1G80830.1
AT1G77490.1	AT1G80840.1
AT1G77580.1	AT1G80910.1
AT1G77580.2	AT2G01060.1
AT1G77680.1	AT2G01070.2
AT1G77930.1	AT2G01100.1
AT1G78020.1	AT2G01150.1
AT1G78100.1	AT2G01220.1
AT1G78200.1	AT2G01220.2
AT1G78280.1	AT2G01410.1
AT1G78300.1	AT2G01450.1
AT1G78550.1	AT2G01450.2
AT1G78600.1	AT2G01450.3
AT1G78600.2	AT2G01450.4
AT1G78650.1	AT2G01490.1
AT1G78660.2	AT2G01630.1
AT1G78830.1	AT2G01660.2
AT1G78870.3	AT2G01720.1
AT1G78880.1	AT2G01735.1
AT1G78890.1	AT2G01830.1
AT1G78900.1	AT2G01830.2
AT1G78900.2	AT2G01830.3
AT1G78915.1	AT2G01970.1
AT1G78915.2	AT2G02040.1
AT1G78920.1	AT2G02120.1
AT1G79110.1	AT2G02130.1
AT1G79110.2	AT2G02370.1
AT1G79230.2	AT2G02370.2
AT1G79380.1	AT2G02850.1
AT1G79430.1	AT2G03090.1
AT1G79460.1	AT2G03720.1
AT1G79550.1	AT2G03810.2
AT1G79550.2	AT2G03890.1
AT1G79570.1	AT2G03890.2
AT1G79660.1	AT2G04030.2
AT1G79750.1	AT2G04170.1
AT1G79790.1	AT2G04170.3
AT1G79830.1	AT2G04170.4
AT1G79830.2	AT2G04240.1
AT1G79880.1	AT2G04240.2
AT1G79880.3	AT2G04280.1
AT1G79940.2	AT2G04350.2
AT1G79940.3	AT2G04360.1
AT1G79940.4	AT2G04378.2
AT1G79970.1	AT2G04550.1
AT1G79970.2	AT2G04550.3
AT1G80120.1	AT2G04865.1
AT1G80180.1	AT2G05170.1
AT1G80380.1	AT2G05220.1
AT1G80380.2	AT2G05220.2
AT1G80610.1	AT2G05380.1
AT1G80620.1	AT2G05510.2
AT1G80640.1	AT2G05510.3
AT1G80700.1	AT2G05510.5
AT1G80750.1	AT2G05510.6
AT1G80920.1	AT2G05630.1
AT1G80940.1	AT2G05920.1
AT1G80980.1	AT2G06530.1
AT2G01320.1	AT2G07050.1
AT2G01320.4	AT2G09990.1
AT2G01410.1	AT2G11520.1
AT2G01710.1	AT2G11910.2
AT2G01918.1	AT2G12400.1
AT2G01930.1	AT2G12462.1
AT2G01930.2	AT2G13360.1
AT2G02130.1	AT2G13360.2
AT2G02160.1	AT2G14045.3
AT2G02170.1	AT2G14110.1
AT2G02170.2	AT2G14170.2
AT2G02360.1	AT2G14720.2
AT2G02470.1	AT2G14910.2
AT2G02730.1	AT2G15240.1
AT2G02950.1	AT2G15580.2
AT2G03390.1	AT2G15970.1
AT2G03390.2	AT2G15970.2
AT2G03690.1	AT2G16405.1
AT2G03760.1	AT2G16440.1
AT2G03800.1	AT2G16510.1
AT2G04270.1	AT2G16530.1
AT2G04270.5	AT2G16530.2
AT2G04350.1	AT2G16600.1
AT2G04350.2	AT2G16600.2
AT2G04378.1	AT2G16650.1
AT2G04780.1	AT2G16860.1
AT2G05070.1	AT2G16940.1
AT2G05100.1	AT2G16940.2
AT2G05440.2	AT2G16940.3
AT2G05440.3	AT2G17130.1
AT2G05440.4	AT2G17130.2
AT2G05440.5	AT2G17350.1
AT2G05520.1	AT2G17360.1
AT2G05520.2	AT2G17360.2
AT2G05520.3	AT2G17370.1
AT2G05520.4	AT2G17410.1
AT2G05520.5	AT2G17450.1
AT2G05520.6	AT2G17560.1
AT2G05830.1	AT2G17560.2
AT2G05840.1	AT2G17560.3
AT2G05840.2	AT2G17710.1
AT2G06050.1	AT2G17787.1
AT2G06210.1	AT2G17800.1
AT2G06990.1	AT2G17800.2
AT2G07690.1	AT2G18050.2
AT2G09990.1	AT2G18090.1
AT2G10940.1	AT2G18110.1
AT2G11520.1	AT2G18160.1
AT2G11890.1	AT2G18162.1
AT2G11890.2	AT2G18230.1
AT2G13790.1	AT2G18370.1
AT2G14560.1	AT2G18390.1
AT2G14720.2	AT2G18400.1
AT2G15270.1	AT2G18465.1
AT2G15480.1	AT2G18750.3
AT2G15620.1	AT2G18840.1
AT2G15890.1	AT2G18960.1
AT2G15890.2	AT2G19180.1
AT2G15960.1	AT2G19520.1
AT2G16070.1	AT2G19570.1
AT2G16440.1	AT2G19730.1
AT2G16510.1	AT2G19730.2
AT2G16780.1	AT2G19730.3
AT2G16850.1	AT2G19760.1
AT2G16900.3	AT2G19940.2
AT2G16930.2	AT2G19950.1
AT2G16950.1	AT2G19950.2
AT2G16950.2	AT2G20130.1
AT2G17230.1	AT2G20230.1
AT2G17240.1	AT2G20270.2
AT2G17350.1	AT2G20320.1
AT2G17440.1	AT2G20420.1
AT2G17530.1	AT2G20490.1
AT2G17530.2	AT2G20490.2
AT2G17530.3	AT2G20550.1
AT2G17540.1	AT2G20550.2
AT2G17550.1	AT2G20725.1
AT2G17695.1	AT2G20760.1
AT2G17695.3	AT2G20780.1
AT2G17790.1	AT2G20820.1
AT2G17880.1	AT2G20820.2
AT2G17980.1	AT2G20840.1
AT2G17990.1	AT2G20900.4
AT2G18030.2	AT2G20990.1
AT2G18040.1	AT2G20990.2
AT2G18050.1	AT2G20990.3
AT2G18050.2	AT2G21170.2
AT2G18110.1	AT2G21240.1
AT2G18160.1	AT2G21290.1
AT2G18230.1	AT2G21380.1
AT2G18328.1	AT2G21520.1
AT2G18330.1	AT2G21520.2
AT2G18570.1	AT2G21580.1
AT2G18630.1	AT2G21580.2
AT2G18740.1	AT2G21600.1
AT2G18740.2	AT2G22100.1
AT2G18750.1	AT2G22120.1
AT2G18750.2	AT2G22122.1
AT2G18750.3	AT2G22125.1
AT2G18840.1	AT2G22170.1
AT2G18876.1	AT2G22190.1
AT2G18960.1	AT2G22250.2
AT2G18990.1	AT2G22270.1
AT2G19260.1	AT2G22400.1
AT2G19690.1	AT2G22540.1
AT2G19720.1	AT2G22540.2
AT2G19940.1	AT2G22780.1
AT2G19950.1	AT2G22795.1
AT2G19950.2	AT2G22910.1
AT2G20120.1	AT2G22970.1
AT2G20140.1	AT2G23030.1
AT2G20180.3	AT2G23080.2
AT2G20570.1	AT2G23340.1
AT2G20570.2	AT2G23370.1
AT2G20670.1	AT2G23430.1
AT2G20690.1	AT2G23820.1
AT2G20710.1	AT2G23950.1
AT2G20710.2	AT2G24060.1
AT2G20740.3	AT2G24120.1
AT2G20850.1	AT2G24240.1
AT2G21060.1	AT2G24260.1
AT2G21190.1	AT2G24580.1
AT2G21230.1	AT2G25110.1
AT2G21230.3	AT2G25280.1
AT2G21250.1	AT2G25290.1
AT2G21300.2	AT2G25290.2
AT2G21330.1	AT2G25290.3
AT2G21330.2	AT2G25310.1
AT2G21330.3	AT2G25355.2
AT2G21380.1	AT2G25430.1
AT2G21385.1	AT2G25580.1
AT2G21530.1	AT2G25670.1
AT2G21620.1	AT2G25670.2
AT2G21620.2	AT2G25760.1
AT2G21660.1	AT2G25760.2
AT2G21660.2	AT2G25790.1
AT2G22100.1	AT2G25850.1
AT2G22270.1	AT2G25850.3
AT2G22330.1	AT2G25870.1
AT2G22430.1	AT2G26140.1
AT2G22570.1	AT2G26300.1
AT2G22570.2	AT2G26460.1
AT2G22670.3	AT2G26500.1
AT2G22970.1	AT2G26500.3
AT2G22970.3	AT2G26510.2
AT2G22980.1	AT2G26530.1
AT2G22980.3	AT2G26530.2
AT2G22980.4	AT2G26600.1
AT2G22990.4	AT2G26600.2
AT2G23370.1	AT2G26770.1
AT2G23420.1	AT2G26980.1
AT2G23600.1	AT2G26980.2
AT2G23840.1	AT2G26980.3
AT2G24020.1	AT2G26980.4
AT2G24090.1	AT2G26980.5
AT2G24270.1	AT2G27030.1
AT2G24270.2	AT2G27190.1
AT2G24270.3	AT2G27200.1
AT2G24330.1	AT2G27290.1
AT2G24360.1	AT2G27330.1
AT2G24395.1	AT2G27350.2
AT2G24440.1	AT2G27350.3
AT2G24500.1	AT2G27350.4
AT2G24590.1	AT2G27600.1
AT2G24600.1	AT2G27710.1
AT2G24600.3	AT2G27710.2
AT2G24762.1	AT2G27710.3
AT2G24765.1	AT2G27710.4
AT2G24860.1	AT2G27720.1
AT2G25450.1	AT2G27970.1
AT2G25520.1	AT2G28100.1
AT2G25650.1	AT2G28110.1
AT2G25670.1	AT2G28450.1
AT2G25670.2	AT2G28450.2
AT2G25840.1	AT2G28510.1
AT2G25840.2	AT2G28660.1
AT2G25840.3	AT2G28760.1
AT2G25850.1	AT2G28760.3
AT2G26060.1	AT2G28840.2
AT2G26080.1	AT2G28890.1
AT2G26100.1	AT2G28900.1
AT2G26150.1	AT2G29190.1
AT2G26150.2	AT2G29200.1
AT2G26200.1	AT2G29210.1
AT2G26460.1	AT2G29530.1
AT2G26540.1	AT2G29530.2
AT2G26600.1	AT2G29540.1
AT2G26600.2	AT2G29540.2
AT2G26730.1	AT2G29550.1
AT2G26740.1	AT2G29570.1
AT2G26810.1	AT2G29750.1
AT2G26810.2	AT2G29890.1
AT2G26890.1	AT2G29890.2
AT2G26920.1	AT2G29980.1
AT2G27050.1	AT2G29980.2
AT2G27228.1	AT2G30050.1
AT2G27350.1	AT2G30250.1
AT2G27350.2	AT2G30280.1
AT2G27402.1	AT2G30330.1
AT2G27450.1	AT2G30410.1
AT2G27820.1	AT2G30410.2
AT2G27950.1	AT2G30470.1
AT2G28000.1	AT2G30600.1
AT2G28450.2	AT2G30600.2
AT2G28550.1	AT2G30600.3
AT2G28550.3	AT2G30600.4
AT2G28800.2	AT2G30600.5
AT2G28910.1	AT2G30710.1
AT2G28940.1	AT2G30740.1
AT2G29200.1	AT2G30840.1
AT2G29360.1	AT2G30860.2
AT2G29450.1	AT2G30970.1
AT2G29510.1	AT2G30990.2
AT2G29540.1	AT2G30990.3
AT2G29630.1	AT2G31040.1
AT2G29630.3	AT2G31060.1
AT2G29670.1	AT2G31060.2
AT2G29960.1	AT2G31060.3
AT2G29960.2	AT2G31130.1
AT2G29970.1	AT2G31300.1
AT2G30110.1	AT2G31305.1
AT2G30140.1	AT2G31360.1
AT2G30140.2	AT2G31410.1
AT2G30260.1	AT2G31610.1
AT2G30490.1	AT2G31660.1
AT2G30520.1	AT2G31810.1
AT2G30600.1	AT2G31810.2
AT2G30600.2	AT2G31810.3
AT2G30600.3	AT2G31880.1
AT2G30600.4	AT2G31955.1
AT2G30600.5	AT2G32020.1
AT2G30860.2	AT2G32235.1
AT2G30910.1	AT2G32280.1
AT2G30910.2	AT2G32430.1
AT2G30910.3	AT2G32560.1
AT2G31010.1	AT2G32580.2
AT2G31010.2	AT2G32900.1
AT2G31040.1	AT2G32910.1
AT2G31240.1	AT2G32950.1
AT2G31560.1	AT2G32980.1
AT2G31560.2	AT2G33150.1
AT2G31570.1	AT2G33220.1
AT2G31680.1	AT2G33440.1
AT2G31725.1	AT2G33620.1
AT2G31800.1	AT2G33620.2
AT2G31810.1	AT2G33620.3
AT2G31810.2	AT2G33770.1
AT2G31810.3	AT2G33790.1
AT2G31880.1	AT2G33990.1
AT2G31955.1	AT2G34310.2
AT2G31955.3	AT2G34310.3
AT2G32010.1	AT2G34450.1
AT2G32010.2	AT2G34690.1
AT2G32070.1	AT2G34720.1
AT2G32080.1	AT2G34730.2
AT2G32080.2	AT2G34840.1
AT2G32220.1	AT2G34900.1
AT2G32520.1	AT2G34900.2
AT2G32850.1	AT2G34970.1
AT2G32850.2	AT2G35120.1
AT2G32950.1	AT2G35190.1
AT2G32980.1	AT2G35605.1
AT2G33330.1	AT2G35630.1
AT2G33370.1	AT2G35635.1
AT2G33380.1	AT2G35736.2
AT2G33380.2	AT2G35795.1
AT2G33550.1	AT2G35940.1
AT2G33793.1	AT2G35940.2
AT2G33800.1	AT2G35940.3
AT2G33850.1	AT2G36100.1
AT2G33855.1	AT2G36130.1
AT2G34070.1	AT2G36170.1
AT2G34300.2	AT2G36230.1
AT2G34420.1	AT2G36290.1
AT2G34470.1	AT2G36295.1
AT2G34470.2	AT2G36300.1
AT2G34510.1	AT2G36410.1
AT2G34560.1	AT2G36410.2
AT2G34560.2	AT2G36410.3
AT2G34640.1	AT2G36570.1
AT2G34690.1	AT2G36580.1
AT2G34710.1	AT2G36620.1
AT2G34730.1	AT2G36680.4
AT2G34730.2	AT2G36830.1
AT2G34750.1	AT2G36835.1
AT2G35840.3	AT2G36900.1
AT2G35960.1	AT2G37040.1
AT2G36000.1	AT2G37060.2
AT2G36000.2	AT2G37080.1
AT2G36070.1	AT2G37170.1
AT2G36230.1	AT2G37270.2
AT2G36250.2	AT2G37340.1
AT2G36310.1	AT2G37340.3
AT2G36360.1	AT2G37410.1
AT2G36360.2	AT2G37410.2
AT2G36460.1	AT2G37420.1
AT2G36460.2	AT2G37460.1
AT2G36580.1	AT2G37470.1
AT2G36840.1	AT2G37500.1
AT2G36850.1	AT2G37500.2
AT2G36900.1	AT2G37630.1
AT2G36930.1	AT2G37710.1
AT2G37040.1	AT2G37860.3
AT2G37120.1	AT2G37990.1
AT2G37130.2	AT2G38000.1
AT2G37160.1	AT2G38025.1
AT2G37160.2	AT2G38120.1
AT2G37170.1	AT2G38130.1
AT2G37190.1	AT2G38310.1
AT2G37200.1	AT2G38410.1
AT2G37220.1	AT2G38470.1
AT2G37230.1	AT2G38530.1
AT2G37240.1	AT2G38610.1
AT2G37400.1	AT2G38640.1
AT2G37470.1	AT2G38750.1
AT2G37550.2	AT2G38840.1
AT2G37600.1	AT2G38880.1
AT2G37600.2	AT2G38880.2
AT2G37660.1	AT2G38880.3
AT2G37710.1	AT2G38880.4
AT2G37760.1	AT2G38880.5
AT2G37760.2	AT2G38880.6
AT2G37760.3	AT2G38880.7
AT2G37990.1	AT2G38880.8
AT2G38110.1	AT2G39000.3
AT2G38140.1	AT2G39080.1
AT2G38230.1	AT2G39310.3
AT2G38270.1	AT2G39450.1
AT2G38465.1	AT2G39460.1
AT2G38580.1	AT2G39460.2
AT2G38740.1	AT2G39570.1
AT2G38790.1	AT2G39700.1
AT2G38820.2	AT2G39720.1
AT2G39000.2	AT2G39740.1
AT2G39170.1	AT2G39770.1
AT2G39260.1	AT2G39780.1
AT2G39420.1	AT2G39780.2
AT2G39450.1	AT2G39960.1
AT2G39470.3	AT2G40020.1
AT2G39570.1	AT2G40110.1
AT2G39670.1	AT2G40140.2
AT2G39670.2	AT2G40410.2
AT2G39700.1	AT2G40430.3
AT2G39705.1	AT2G40590.1
AT2G39770.1	AT2G40660.1
AT2G39770.2	AT2G40765.1
AT2G39795.1	AT2G40820.1
AT2G39800.3	AT2G40840.1
AT2G39800.4	AT2G40950.1
AT2G39805.1	AT2G41010.1
AT2G39870.1	AT2G41430.2
AT2G39900.1	AT2G41430.3
AT2G40270.1	AT2G41600.3
AT2G40270.2	AT2G41680.1
AT2G40290.1	AT2G42230.1
AT2G40620.1	AT2G42230.2
AT2G40765.1	AT2G42280.1
AT2G40890.1	AT2G42280.2
AT2G41090.1	AT2G42310.1
AT2G41100.1	AT2G42490.1
AT2G41100.3	AT2G42570.1
AT2G41100.4	AT2G42590.1
AT2G41410.1	AT2G42590.2
AT2G41430.1	AT2G42590.3
AT2G41430.2	AT2G42710.1
AT2G41430.4	AT2G42810.1
AT2G41430.5	AT2G42810.2
AT2G41475.1	AT2G42890.1
AT2G41500.1	AT2G42890.2
AT2G41530.1	AT2G42890.3
AT2G41540.1	AT2G42910.1
AT2G41540.3	AT2G43060.1
AT2G41680.1	AT2G43070.1
AT2G41705.1	AT2G43140.2
AT2G41705.2	AT2G43320.2
AT2G42130.2	AT2G43330.1
AT2G42130.4	AT2G43400.1
AT2G42220.1	AT2G43590.1
AT2G42490.1	AT2G43750.1
AT2G42500.1	AT2G43750.2
AT2G42500.2	AT2G43760.1
AT2G42540.1	AT2G43760.2
AT2G42540.2	AT2G43760.3
AT2G42540.3	AT2G43780.2
AT2G42570.1	AT2G43820.1
AT2G42600.2	AT2G43910.1
AT2G42710.1	AT2G43920.1
AT2G42760.1	AT2G43920.2
AT2G42780.1	AT2G44160.1
AT2G42840.1	AT2G44350.1
AT2G43160.1	AT2G44350.2
AT2G43160.3	AT2G44360.1
AT2G43360.1	AT2G44490.1
AT2G43400.1	AT2G44670.1
AT2G43560.1	AT2G45170.1
AT2G43650.1	AT2G45170.2
AT2G43820.1	AT2G45290.1
AT2G43910.1	AT2G45380.2
AT2G43910.2	AT2G45460.2
AT2G44065.1	AT2G45460.3
AT2G44160.1	AT2G45640.1
AT2G44290.1	AT2G45640.2
AT2G44310.1	AT2G45660.1
AT2G44410.1	AT2G45680.1
AT2G44430.1	AT2G45720.2
AT2G44525.1	AT2G45820.1
AT2G44610.1	AT2G45910.1
AT2G44770.1	AT2G45920.1
AT2G44860.2	AT2G45980.1
AT2G44920.2	AT2G46170.1
AT2G45070.1	AT2G46220.1
AT2G45160.1	AT2G46225.3
AT2G45180.1	AT2G46230.1
AT2G45260.1	AT2G46230.2
AT2G45330.2	AT2G46280.3
AT2G45470.1	AT2G46370.1
AT2G45520.1	AT2G46370.2
AT2G45530.1	AT2G46370.4
AT2G45540.2	AT2G46410.1
AT2G45640.2	AT2G46505.1
AT2G45720.2	AT2G46890.1
AT2G45730.1	AT2G46900.1
AT2G45790.1	AT2G47270.1
AT2G45820.1	AT2G47390.1
AT2G45850.1	AT2G47400.1
AT2G45850.2	AT2G47420.1
AT2G45920.1	AT2G47470.1
AT2G45990.1	AT2G47470.2
AT2G45990.3	AT2G47470.3
AT2G46220.1	AT2G47470.4
AT2G46280.3	AT2G47500.1
AT2G46320.1	AT2G47970.2
AT2G46320.2	AT2G47980.1
AT2G46320.3	AT2G48140.2
AT2G46390.1	AT3G01040.1
AT2G46450.3	AT3G01040.2
AT2G46490.1	AT3G01090.2
AT2G46505.1	AT3G01090.3
AT2G46620.1	AT3G01130.1
AT2G46680.2	AT3G01420.1
AT2G46820.1	AT3G01472.1
AT2G46915.1	AT3G01520.1
AT2G47110.2	AT3G01590.1
AT2G47240.1	AT3G01590.2
AT2G47240.2	AT3G01610.1
AT2G47580.1	AT3G01650.1
AT2G47790.1	AT3G01670.1
AT2G47930.1	AT3G01710.1
AT2G47940.2	AT3G01710.2
AT2G48020.1	AT3G01800.1
AT2G48020.2	AT3G01850.1
AT2G48030.1	AT3G01850.2
AT2G48100.4	AT3G02065.2
AT2G48160.1	AT3G02065.3
AT3G01130.1	AT3G02070.1
AT3G01170.1	AT3G02080.1
AT3G01480.1	AT3G02120.1
AT3G01480.2	AT3G02180.3
AT3G01490.1	AT3G02190.1
AT3G01560.1	AT3G02200.1
AT3G01590.1	AT3G02220.1
AT3G01590.2	AT3G02230.1
AT3G01670.1	AT3G02300.1
AT3G01690.1	AT3G02320.1
AT3G01850.2	AT3G02350.1
AT3G01910.1	AT3G02420.1
AT3G01910.2	AT3G02460.1
AT3G01910.3	AT3G02460.2
AT3G01980.1	AT3G02468.1
AT3G01980.2	AT3G02470.1
AT3G01980.3	AT3G02470.3
AT3G01980.4	AT3G02470.4
AT3G02050.1	AT3G02510.1
AT3G02065.3	AT3G02520.1
AT3G02080.1	AT3G02540.2
AT3G02120.1	AT3G02560.1
AT3G02180.1	AT3G02560.2
AT3G02180.2	AT3G02600.3
AT3G02190.1	AT3G02600.5
AT3G02200.2	AT3G02700.1
AT3G02420.1	AT3G02750.1
AT3G02540.2	AT3G02750.2
AT3G02555.1	AT3G02750.3
AT3G02570.1	AT3G02790.1
AT3G02600.3	AT3G02870.1
AT3G02700.1	AT3G02870.2
AT3G02720.1	AT3G02950.1
AT3G02730.1	AT3G03060.1
AT3G02750.1	AT3G03140.1
AT3G02750.2	AT3G03150.1
AT3G02750.3	AT3G03160.1
AT3G02830.1	AT3G03270.2
AT3G03160.1	AT3G03420.1
AT3G03250.1	AT3G03610.1
AT3G03270.2	AT3G03640.1
AT3G03460.1	AT3G03670.1
AT3G03470.1	AT3G03940.1
AT3G03780.1	AT3G04230.1
AT3G03780.3	AT3G04550.1
AT3G03920.1	AT3G04720.1
AT3G04520.2	AT3G04730.1
AT3G04580.1	AT3G04830.1
AT3G04580.2	AT3G04830.2
AT3G04590.1	AT3G04840.1
AT3G04630.1	AT3G04920.1
AT3G04630.2	AT3G05020.1
AT3G04670.2	AT3G05090.1
AT3G04680.2	AT3G05210.1
AT3G04730.1	AT3G05380.1
AT3G04770.1	AT3G05380.2
AT3G04790.1	AT3G05380.3
AT3G04810.1	AT3G05380.4
AT3G04810.2	AT3G05380.5
AT3G04870.1	AT3G05530.1
AT3G05170.1	AT3G05545.1
AT3G05290.1	AT3G05570.1
AT3G05380.1	AT3G05710.1
AT3G05380.2	AT3G05710.2
AT3G05380.3	AT3G05840.2
AT3G05380.4	AT3G05890.1
AT3G05380.5	AT3G06080.1
AT3G05410.1	AT3G06080.2
AT3G05410.2	AT3G06340.1
AT3G05420.2	AT3G06340.2
AT3G05510.1	AT3G06350.1
AT3G05640.1	AT3G06455.1
AT3G05640.2	AT3G06500.1
AT3G05710.1	AT3G06720.1
AT3G05710.2	AT3G06720.2
AT3G05727.1	AT3G06760.1
AT3G05750.2	AT3G06760.2
AT3G05800.1	AT3G06930.1
AT3G05880.1	AT3G06930.2
AT3G06080.1	AT3G07210.1
AT3G06080.2	AT3G07270.1
AT3G06130.1	AT3G07310.1
AT3G06130.2	AT3G07540.1
AT3G06200.1	AT3G07650.2
AT3G06270.1	AT3G07650.3
AT3G06310.1	AT3G07690.1
AT3G06450.1	AT3G07740.1
AT3G06450.2	AT3G07940.1
AT3G06483.1	AT3G08640.1
AT3G06500.1	AT3G08690.1
AT3G06510.1	AT3G08690.2
AT3G06510.2	AT3G09150.1
AT3G06590.1	AT3G09150.2
AT3G06610.1	AT3G09200.1
AT3G06620.1	AT3G09200.2
AT3G06650.1	AT3G09410.1
AT3G06750.1	AT3G09500.1
AT3G06850.1	AT3G09710.1
AT3G06850.2	AT3G09720.1
AT3G06868.1	AT3G09735.1
AT3G06980.1	AT3G09740.1
AT3G07010.1	AT3G09830.1
AT3G07090.1	AT3G09860.1
AT3G07100.1	AT3G09890.1
AT3G07360.1	AT3G09980.1
AT3G07360.2	AT3G10030.2
AT3G07480.1	AT3G10070.1
AT3G07540.1	AT3G10090.1
AT3G07565.3	AT3G10120.1
AT3G07640.1	AT3G10300.3
AT3G07660.1	AT3G10480.1
AT3G07700.1	AT3G10480.2
AT3G07700.3	AT3G10480.3
AT3G07810.1	AT3G10490.1
AT3G07860.1	AT3G10610.1
AT3G07910.1	AT3G10640.2
AT3G08030.2	AT3G10740.1
AT3G08590.1	AT3G10760.1
AT3G08590.2	AT3G10860.1
AT3G08720.1	AT3G10920.1
AT3G08720.2	AT3G10920.2
AT3G08740.1	AT3G10985.1
AT3G08760.1	AT3G11320.1
AT3G08890.2	AT3G11340.1
AT3G08940.1	AT3G11400.1
AT3G08940.2	AT3G11400.2
AT3G09085.1	AT3G11420.1
AT3G09100.1	AT3G11630.1
AT3G09150.2	AT3G11660.1
AT3G09210.1	AT3G11720.1
AT3G09350.1	AT3G11770.1
AT3G09350.2	AT3G11810.1
AT3G09570.1	AT3G11910.1
AT3G09630.1	AT3G11940.1
AT3G09630.2	AT3G11940.2
AT3G09690.2	AT3G12050.1
AT3G09710.2	AT3G12050.2
AT3G09735.1	AT3G12110.1
AT3G09820.2	AT3G12140.1
AT3G09830.1	AT3G12140.2
AT3G09830.2	AT3G12280.1
AT3G09860.1	AT3G12350.2
AT3G09880.1	AT3G12360.1
AT3G09890.1	AT3G12490.2
AT3G09890.2	AT3G12560.1
AT3G09900.1	AT3G12570.2
AT3G10020.1	AT3G12600.1
AT3G10030.1	AT3G12600.2
AT3G10030.2	AT3G12670.1
AT3G10060.1	AT3G12680.1
AT3G10070.1	AT3G12955.1
AT3G10120.1	AT3G13226.1
AT3G10210.1	AT3G13235.1
AT3G10260.3	AT3G13310.1
AT3G10370.1	AT3G13320.1
AT3G10410.1	AT3G13340.1
AT3G10525.1	AT3G13410.1
AT3G10530.1	AT3G13460.1
AT3G10610.1	AT3G13460.2
AT3G10650.1	AT3G13460.3
AT3G10720.1	AT3G13460.4
AT3G10720.2	AT3G13520.1
AT3G10730.1	AT3G13570.1
AT3G10870.1	AT3G13580.1
AT3G11330.1	AT3G13580.2
AT3G11400.1	AT3G13580.3
AT3G11400.2	AT3G13610.1
AT3G11650.1	AT3G13720.1
AT3G11700.1	AT3G13860.1
AT3G11800.1	AT3G13920.1
AT3G11830.1	AT3G13920.3
AT3G11910.1	AT3G13990.1
AT3G12030.1	AT3G13990.2
AT3G12145.1	AT3G14150.1
AT3G12210.1	AT3G14150.2
AT3G12345.1	AT3G14240.1
AT3G12480.1	AT3G14290.1
AT3G12740.1	AT3G14400.1
AT3G12800.1	AT3G14430.1
AT3G12920.1	AT3G14600.1
AT3G13040.2	AT3G14610.1
AT3G13120.1	AT3G14870.2
AT3G13120.2	AT3G14870.3
AT3G13180.1	AT3G14940.1
AT3G13224.1	AT3G14990.2
AT3G13225.1	AT3G15010.1
AT3G13235.2	AT3G15060.1
AT3G13310.1	AT3G15070.1
AT3G13440.1	AT3G15240.2
AT3G13480.1	AT3G15351.2
AT3G13550.1	AT3G15352.1
AT3G13580.1	AT3G15360.1
AT3G13690.1	AT3G15450.1
AT3G13740.1	AT3G15450.2
AT3G13740.2	AT3G15450.3
AT3G13860.1	AT3G15510.1
AT3G13910.1	AT3G15610.1
AT3G14000.1	AT3G15630.1
AT3G14000.2	AT3G15660.1
AT3G14080.1	AT3G15660.2
AT3G14080.2	AT3G15940.1
AT3G14110.1	AT3G15940.2
AT3G14172.1	AT3G15950.1
AT3G14180.1	AT3G15950.2
AT3G14240.1	AT3G16000.1
AT3G14290.1	AT3G16050.1
AT3G14390.1	AT3G16080.1
AT3G14400.1	AT3G16240.1
AT3G14415.1	AT3G16410.1
AT3G14415.2	AT3G16420.1
AT3G14415.3	AT3G16420.2
AT3G14595.1	AT3G16420.3
AT3G14760.1	AT3G16430.1
AT3G14840.2	AT3G16640.1
AT3G14870.1	AT3G16720.1
AT3G14870.2	AT3G16770.1
AT3G14870.3	AT3G16940.1
AT3G15000.1	AT3G17090.1
AT3G15070.2	AT3G17090.2
AT3G15080.1	AT3G17465.1
AT3G15290.1	AT3G17510.2
AT3G15351.3	AT3G17580.1
AT3G15352.1	AT3G17590.1
AT3G15353.1	AT3G17590.2
AT3G15356.1	AT3G17770.1
AT3G15360.1	AT3G17840.1
AT3G15395.4	AT3G18000.1
AT3G15450.1	AT3G18050.1
AT3G15450.2	AT3G18130.1
AT3G15450.3	AT3G18140.1
AT3G15520.1	AT3G18165.1
AT3G15570.1	AT3G18290.1
AT3G15630.1	AT3G18410.1
AT3G15710.1	AT3G18420.1
AT3G15950.1	AT3G18430.1
AT3G15950.2	AT3G18560.1
AT3G16140.1	AT3G18773.1
AT3G16420.1	AT3G18780.1
AT3G16420.2	AT3G19030.1
AT3G16420.3	AT3G19080.1
AT3G16530.1	AT3G19170.1
AT3G16660.1	AT3G19170.2
AT3G16720.1	AT3G19390.1
AT3G16770.1	AT3G19420.1
AT3G16800.1	AT3G19490.1
AT3G16800.2	AT3G19515.2
AT3G16857.2	AT3G19660.1
AT3G16940.1	AT3G19710.1
AT3G16950.2	AT3G19740.1
AT3G17000.1	AT3G19930.1
AT3G17120.1	AT3G19990.1
AT3G17120.2	AT3G20050.1
AT3G17390.1	AT3G20100.1
AT3G17470.1	AT3G20150.1
AT3G17590.1	AT3G20320.2
AT3G17700.1	AT3G20390.1
AT3G17750.1	AT3G20470.1
AT3G17780.1	AT3G20510.1
AT3G18050.1	AT3G20550.1
AT3G18080.1	AT3G20650.1
AT3G18520.1	AT3G20650.2
AT3G18790.1	AT3G20660.1
AT3G19000.2	AT3G20800.1
AT3G19010.1	AT3G21140.1
AT3G19080.1	AT3G21190.1
AT3G19240.1	AT3G21240.1
AT3G19290.1	AT3G21295.1
AT3G19290.3	AT3G21510.1
AT3G19420.1	AT3G21630.1
AT3G19450.1	AT3G21640.1
AT3G19640.1	AT3G22170.2
AT3G19680.1	AT3G22220.2
AT3G19820.1	AT3G22235.2
AT3G19820.2	AT3G22240.1
AT3G19820.3	AT3G22320.1
AT3G19850.1	AT3G22430.1
AT3G19990.1	AT3G22600.1
AT3G20000.1	AT3G22630.1
AT3G20230.1	AT3G22890.1
AT3G20300.1	AT3G22950.1
AT3G20430.1	AT3G22950.2
AT3G20440.2	AT3G22960.1
AT3G20470.1	AT3G22990.1
AT3G20540.1	AT3G23070.1
AT3G20540.2	AT3G23175.1
AT3G20570.1	AT3G23210.1
AT3G20650.1	AT3G23250.1
AT3G20650.2	AT3G23250.2
AT3G20670.1	AT3G23280.1
AT3G20780.1	AT3G23280.2
AT3G20790.1	AT3G23530.1
AT3G20800.1	AT3G23690.1
AT3G20810.1	AT3G23800.1
AT3G20810.2	AT3G23810.1
AT3G20810.3	AT3G23920.1
AT3G20820.1	AT3G23930.1
AT3G21055.1	AT3G24070.1
AT3G21560.1	AT3G24170.1
AT3G21690.1	AT3G24450.1
AT3G21750.1	AT3G24490.1
AT3G21760.1	AT3G24506.1
AT3G22104.1	AT3G25040.1
AT3G22120.1	AT3G25070.1
AT3G22170.1	AT3G25470.1
AT3G22190.2	AT3G25585.3
AT3G22210.1	AT3G25800.1
AT3G22230.1	AT3G25820.1
AT3G22260.1	AT3G25830.1
AT3G22260.2	AT3G25940.1
AT3G22260.3	AT3G26020.1
AT3G22290.1	AT3G26020.2
AT3G22300.1	AT3G26020.3
AT3G22320.1	AT3G26020.4
AT3G22330.1	AT3G26340.1
AT3G22370.1	AT3G26460.1
AT3G22425.1	AT3G26510.1
AT3G22430.1	AT3G26510.5
AT3G22520.1	AT3G26618.1
AT3G22530.1	AT3G26744.2
AT3G22790.1	AT3G26890.2
AT3G22890.1	AT3G26890.3
AT3G22930.1	AT3G26890.4
AT3G22990.1	AT3G26890.5
AT3G23070.1	AT3G26890.6
AT3G23080.2	AT3G26910.1
AT3G23400.1	AT3G26910.2
AT3G23530.1	AT3G26980.1
AT3G23570.1	AT3G26990.1
AT3G23600.1	AT3G27010.1
AT3G23600.2	AT3G27100.1
AT3G24070.1	AT3G27190.1
AT3G24120.2	AT3G27300.1
AT3G24190.1	AT3G27300.2
AT3G24350.1	AT3G27300.3
AT3G24350.2	AT3G27360.1
AT3G24430.1	AT3G27460.1
AT3G24503.1	AT3G27460.2
AT3G24740.1	AT3G27520.1
AT3G24740.2	AT3G27580.2
AT3G24760.1	AT3G28180.1
AT3G24770.1	AT3G28710.1
AT3G24860.1	AT3G29160.1
AT3G25040.1	AT3G29200.1
AT3G25150.1	AT3G29360.2
AT3G25190.1	AT3G29390.1
AT3G25440.1	AT3G29430.1
AT3G25470.1	AT3G29575.4
AT3G25560.1	AT3G30300.1
AT3G25560.2	AT3G30390.1
AT3G25660.1	AT3G30390.2
AT3G25805.1	AT3G42790.1
AT3G25940.1	AT3G43600.1
AT3G26080.1	AT3G43960.1
AT3G26170.1	AT3G44010.1
AT3G26510.1	AT3G44150.1
AT3G26510.2	AT3G44200.1
AT3G26510.3	AT3G44340.1
AT3G26510.4	AT3G44600.1
AT3G26510.5	AT3G44720.1
AT3G26580.1	AT3G44730.1
AT3G26650.1	AT3G44735.2
AT3G26740.1	AT3G44890.1
AT3G26744.1	AT3G44990.1
AT3G26744.2	AT3G45090.1
AT3G26744.4	AT3G45090.2
AT3G27080.1	AT3G45240.1
AT3G27160.1	AT3G45240.2
AT3G27200.1	AT3G45240.3
AT3G27260.1	AT3G45242.1
AT3G27260.2	AT3G45600.1
AT3G27340.1	AT3G45710.1
AT3G27350.1	AT3G45730.1
AT3G27460.1	AT3G46010.1
AT3G27460.2	AT3G46290.1
AT3G27520.1	AT3G46320.1
AT3G27740.1	AT3G46460.1
AT3G27850.1	AT3G46510.1
AT3G27906.1	AT3G46830.1
AT3G27960.1	AT3G46970.1
AT3G28220.1	AT3G47220.1
AT3G28730.1	AT3G47370.1
AT3G28900.1	AT3G47370.3
AT3G29075.1	AT3G47520.1
AT3G29280.1	AT3G47800.1
AT3G29310.1	AT3G47965.1
AT3G30300.1	AT3G47980.1
AT3G32930.1	AT3G48000.1
AT3G42150.3	AT3G48040.1
AT3G43540.1	AT3G48140.1
AT3G43540.2	AT3G48410.1
AT3G43590.1	AT3G48880.1
AT3G43800.1	AT3G49010.1
AT3G43980.1	AT3G49010.4
AT3G44280.1	AT3G49010.5
AT3G44300.1	AT3G49080.1
AT3G44600.1	AT3G49210.1
AT3G44720.1	AT3G49240.1
AT3G44860.1	AT3G49350.1
AT3G45030.1	AT3G49430.2
AT3G45050.4	AT3G49470.1
AT3G45190.1	AT3G49640.1
AT3G45240.1	AT3G49640.2
AT3G45240.3	AT3G49720.1
AT3G45620.1	AT3G49720.2
AT3G45620.2	AT3G49780.1
AT3G45780.1	AT3G49870.1
AT3G45780.2	AT3G49940.1
AT3G45930.1	AT3G50060.1
AT3G45970.1	AT3G50210.1
AT3G46010.1	AT3G50210.2
AT3G46010.2	AT3G50210.3
AT3G46040.1	AT3G50360.1
AT3G46060.1	AT3G50370.1
AT3G46060.2	AT3G50700.1
AT3G46060.3	AT3G50740.1
AT3G46590.1	AT3G50830.1
AT3G46590.2	AT3G50950.1
AT3G46590.3	AT3G51000.1
AT3G46600.1	AT3G51040.1
AT3G46600.3	AT3G51260.1
AT3G46640.2	AT3G51260.2
AT3G46640.3	AT3G51310.1
AT3G46780.1	AT3G51330.1
AT3G46870.1	AT3G51370.1
AT3G47080.1	AT3G51460.1
AT3G47470.1	AT3G51500.1
AT3G47640.2	AT3G51630.2
AT3G47640.3	AT3G51640.1
AT3G47910.1	AT3G51640.2
AT3G47910.2	AT3G51670.1
AT3G47960.1	AT3G51730.1
AT3G48090.1	AT3G51770.1
AT3G48100.1	AT3G51770.2
AT3G48730.1	AT3G51780.1
AT3G48820.2	AT3G51790.1
AT3G48870.2	AT3G51940.1
AT3G49000.1	AT3G52040.1
AT3G49010.3	AT3G52060.1
AT3G49430.1	AT3G52060.2
AT3G49530.1	AT3G52105.1
AT3G49680.1	AT3G52120.2
AT3G49680.2	AT3G52140.1
AT3G49890.1	AT3G52140.2
AT3G50240.1	AT3G52140.3
AT3G50370.1	AT3G52140.4
AT3G50480.1	AT3G52220.1
AT3G50520.1	AT3G52230.1
AT3G50630.1	AT3G52300.1
AT3G50670.1	AT3G52300.2
AT3G50700.1	AT3G52450.1
AT3G50740.1	AT3G52560.2
AT3G50950.1	AT3G52580.1
AT3G51040.1	AT3G52660.2
AT3G51040.3	AT3G52730.1
AT3G51120.1	AT3G52860.1
AT3G51150.1	AT3G53020.1
AT3G51150.2	AT3G53410.1
AT3G51230.1	AT3G53420.1
AT3G51280.1	AT3G53420.2
AT3G51500.1	AT3G53430.1
AT3G51630.1	AT3G53460.1
AT3G51630.2	AT3G53460.3
AT3G51632.1	AT3G53460.4
AT3G51650.1	AT3G53480.1
AT3G51740.1	AT3G53668.1
AT3G51790.1	AT3G53670.1
AT3G51820.1	AT3G53670.2
AT3G51880.4	AT3G53730.1
AT3G51920.1	AT3G53890.1
AT3G51940.1	AT3G53980.2
AT3G51960.2	AT3G53990.2
AT3G52060.1	AT3G54000.1
AT3G52060.2	AT3G54000.2
AT3G52110.1	AT3G54010.1
AT3G52110.2	AT3G54030.1
AT3G52120.1	AT3G54040.1
AT3G52140.1	AT3G54100.1
AT3G52140.2	AT3G54440.3
AT3G52140.3	AT3G54470.1
AT3G52140.4	AT3G54560.1
AT3G52180.2	AT3G54650.1
AT3G52200.1	AT3G54770.1
AT3G52200.2	AT3G54810.1
AT3G52230.1	AT3G54880.1
AT3G52240.1	AT3G54890.1
AT3G52660.1	AT3G54890.2
AT3G52840.1	AT3G54890.3
AT3G52900.1	AT3G54960.1
AT3G52960.1	AT3G55000.1
AT3G53000.1	AT3G55005.1
AT3G53120.1	AT3G55020.1
AT3G53180.1	AT3G55140.1
AT3G53270.4	AT3G55140.2
AT3G53420.1	AT3G55230.1
AT3G53420.2	AT3G55360.1
AT3G53520.1	AT3G55410.1
AT3G53520.4	AT3G55460.1
AT3G53800.1	AT3G55470.1
AT3G53900.1	AT3G55470.2
AT3G53990.1	AT3G55750.1
AT3G53990.2	AT3G55850.1
AT3G54030.1	AT3G55850.2
AT3G54050.1	AT3G55880.2
AT3G54090.1	AT3G56070.1
AT3G54170.1	AT3G56070.2
AT3G54220.1	AT3G56130.2
AT3G54230.1	AT3G56130.3
AT3G54400.1	AT3G56150.1
AT3G54540.1	AT3G56170.1
AT3G54850.1	AT3G56190.2
AT3G54880.1	AT3G56210.2
AT3G54890.2	AT3G56210.4
AT3G54900.1	AT3G56210.5
AT3G55040.1	AT3G56410.2
AT3G55070.1	AT3G56580.3
AT3G55070.2	AT3G56720.1
AT3G55170.1	AT3G56720.2
AT3G55170.2	AT3G56910.1
AT3G55270.1	AT3G57000.1
AT3G55400.1	AT3G57010.1
AT3G55400.2	AT3G57290.1
AT3G55450.1	AT3G57320.1
AT3G55470.1	AT3G57340.1
AT3G55500.1	AT3G57340.2
AT3G55750.1	AT3G57480.1
AT3G55830.1	AT3G57520.1
AT3G55850.1	AT3G57520.2
AT3G55850.2	AT3G57520.3
AT3G55960.1	AT3G57560.1
AT3G55980.1	AT3G57610.1
AT3G56040.1	AT3G57785.1
AT3G56060.1	AT3G57890.1
AT3G56140.1	AT3G57890.2
AT3G56170.1	AT3G58030.2
AT3G56310.1	AT3G58460.1
AT3G56310.2	AT3G58550.1
AT3G56580.2	AT3G58570.1
AT3G56680.1	AT3G58660.1
AT3G56910.1	AT3G58710.1
AT3G56940.1	AT3G59090.1
AT3G57050.1	AT3G59090.2
AT3G57050.2	AT3G59090.3
AT3G57080.1	AT3G59280.1
AT3G57230.1	AT3G59350.2
AT3G57260.1	AT3G59370.1
AT3G57300.1	AT3G59470.2
AT3G57300.2	AT3G59540.1
AT3G57450.1	AT3G59630.1
AT3G57470.1	AT3G59640.1
AT3G57470.2	AT3G59770.1
AT3G57470.3	AT3G59770.3
AT3G57540.1	AT3G59940.1
AT3G57785.1	AT3G59990.1
AT3G57800.1	AT3G60050.1
AT3G57870.1	AT3G60130.3
AT3G57910.1	AT3G60140.1
AT3G57930.1	AT3G60210.1
AT3G57940.1	AT3G60250.1
AT3G58020.1	AT3G60250.2
AT3G58030.1	AT3G60260.1
AT3G58030.2	AT3G60340.1
AT3G58030.3	AT3G60340.2
AT3G58030.4	AT3G60770.1
AT3G58180.1	AT3G60810.1
AT3G58220.1	AT3G60850.1
AT3G58460.1	AT3G61580.1
AT3G58470.1	AT3G61640.1
AT3G58510.1	AT3G61850.4
AT3G58560.1	AT3G62030.1
AT3G58610.2	AT3G62030.3
AT3G58620.1	AT3G62090.1
AT3G58670.1	AT3G62090.2
AT3G58670.2	AT3G62090.3
AT3G58700.1	AT3G62220.1
AT3G58840.1	AT3G62260.1
AT3G59040.1	AT3G62260.2
AT3G59040.2	AT3G62290.1
AT3G59052.1	AT3G62330.1
AT3G59110.1	AT3G62560.1
AT3G59350.2	AT3G62580.1
AT3G59400.1	AT3G62650.1
AT3G59760.1	AT3G62650.2
AT3G59820.1	AT3G62660.1
AT3G59820.2	AT3G62720.2
AT3G59920.1	AT3G62790.1
AT3G60190.1	AT3G62840.1
AT3G60210.1	AT3G62840.2
AT3G60250.1	AT3G62980.1
AT3G60250.2	AT3G63150.1
AT3G60300.1	AT3G63180.1
AT3G60300.2	AT3G63210.1
AT3G60440.1	AT3G63240.1
AT3G60500.1	AT3G63260.2
AT3G60500.2	AT3G63420.1
AT3G60500.3	AT3G63450.3
AT3G60600.1	AT3G63530.1
AT3G61070.1	AT3G63530.2
AT3G61070.2	AT3G66654.1
AT3G61070.3	AT3G66654.2
AT3G61080.1	AT3G66654.3
AT3G61100.1	AT3G66658.1
AT3G61150.1	AT3G66658.2
AT3G61190.2	AT4G00090.1
AT3G61200.1	AT4G00230.1
AT3G61240.2	AT4G00270.1
AT3G61310.1	AT4G00355.1
AT3G61470.1	AT4G00355.2
AT3G61570.1	AT4G00355.3
AT3G61600.1	AT4G00355.4
AT3G61600.2	AT4G00440.1
AT3G61790.1	AT4G00440.2
AT3G61850.3	AT4G00440.3
AT3G62010.1	AT4G00710.1
AT3G62010.2	AT4G00820.1
AT3G62410.1	AT4G00830.1
AT3G62460.1	AT4G00830.2
AT3G62550.1	AT4G00830.3
AT3G62770.1	AT4G00830.4
AT3G62840.1	AT4G01070.1
AT3G62840.2	AT4G01070.2
AT3G62910.1	AT4G01250.1
AT3G62940.2	AT4G01310.1
AT3G62940.3	AT4G01330.2
AT3G63140.1	AT4G01410.1
AT3G63160.1	AT4G01440.1
AT3G63170.1	AT4G01450.1
AT3G63180.1	AT4G01480.1
AT3G63180.2	AT4G01550.1
AT3G63240.1	AT4G01550.2
AT3G63310.1	AT4G01590.1
AT3G63410.1	AT4G01590.2
AT3G63510.2	AT4G01660.1
AT3G63530.2	AT4G01670.1
AT4G00040.1	AT4G01720.1
AT4G00090.1	AT4G01880.1
AT4G00100.1	AT4G02010.1
AT4G00310.1	AT4G02075.1
AT4G00360.1	AT4G02130.1
AT4G00420.3	AT4G02130.3
AT4G00430.2	AT4G02340.1
AT4G00440.2	AT4G02350.1
AT4G00440.3	AT4G02370.1
AT4G00570.1	AT4G02400.1
AT4G00800.1	AT4G02410.1
AT4G01026.1	AT4G02480.1
AT4G01037.1	AT4G02530.1
AT4G01050.1	AT4G02560.1
AT4G01120.1	AT4G02560.2
AT4G01150.1	AT4G02570.1
AT4G01280.1	AT4G02880.2
AT4G01280.2	AT4G02920.1
AT4G01320.1	AT4G02920.2
AT4G01400.2	AT4G02940.1
AT4G01550.1	AT4G03080.1
AT4G01550.2	AT4G03090.1
AT4G01580.1	AT4G04210.1
AT4G01590.3	AT4G04770.1
[truncated: 1,177 more rows]

## Sheet: S8
S8 Abundance Relationships
						Fisher Z-Test Results for Pearson Correlations (p-values)
S8A Mean Reactivity vs. Transcript Abundance, Individual Structuromes				Pearson Correlation		Shoot Control				Shoot Salt				Root Control				Root Salt
Sample	Region	Class	n	r	p	whole	5’UTR	CDS	3’UTR	whole	5’UTR	CDS	3’UTR	whole	5’UTR	CDS	3’UTR	whole	5’UTR	CDS	3’UTR
Shoot Control	whole	Individual	16699	0.758155	< 2.2e-16	1	0	0	0	0.2502	0	0	0	0.0004	0	0	0	0.2982	0	0	0
	5'UTR	Individual	15171	0.314141	< 2.2e-16	0	1	0	0	0	0.0126	0	0	0	0.0014	0	0.0377	0	0	0	0.1579
	CDS	Individual	16523	0.711137	< 2.2e-16	0	0	1	0	0	0	0.0008	0	0	0	0.0094	0	0	0	0	0
	3'UTR	Individual	15210	0.287268	< 2.2e-16	0	0	0	1	0	0.9322	0	0.1026	0	0	0	0	0	0	0	0.2518
Shoot Salt	whole	Individual	16872	0.763442	< 2.2e-16	0.2502	0	0	0	1	0	0	0	0.0174	0	0	0	0.0288	0	0	0
	5'UTR	Individual	15344	0.28816	< 2.2e-16	0	0.0126	0	0.9322	0	1	0	0.0852	0	0	0	0	0	0	0	0.2874
	CDS	Individual	16687	0.69246	< 2.2e-16	0	0	0.0008	0	0	0	1	0	0	0	0.4371	0	0	0	0.0975	0
	3'UTR	Individual	15428	0.270064	< 2.2e-16	0	0	0	0.1026	0	0.0852	0	1	0	0	0	0	0	0	0	0.0056
Root Control	whole	Individual	17282	0.773975	< 2.2e-16	0.0004	0	0	0	0.0174	0	0	0	1	0	0	0	0	0	0	0
	5'UTR	Individual	15618	0.346507	< 2.2e-16	0	0.0014	0	0	0	0	0	0	0	1	0	0.2627	0	0.0144	0	0
	CDS	Individual	17070	0.696838	< 2.2e-16	0	0	0.0094	0	0	0	0.4371	0	0	0	1	0	0	0	0.0148	0
	3'UTR	Individual	15673	0.335315	< 2.2e-16	0	0.0377	0	0	0	0	0	0	0	0.2627	0	1	0	0.0004	0	0.0005
Root Salt	whole	Individual	16334	0.753244	< 2.2e-16	0.2982	0	0	0	0.0288	0	0	0	0	0	0	0	1	0	0	0
	5'UTR	Individual	14886	0.370935	< 2.2e-16	0	0	0	0	0	0	0	0	0	0.0144	0	0.0004	0	1	0	0
	CDS	Individual	16164	0.682818	< 2.2e-16	0	0	0	0	0	0	0.0975	0	0	0	0.0148	0	0	0	1	0
	3'UTR	Individual	14802	0.29936	< 2.2e-16	0	0.1579	0	0.2518	0	0.2874	0	0.0056	0	0	0	0.0005	0	0	0	1
						Fisher Z-Test Results for Pearson Correlations (p-values)
S8B Mean Reactivity vs. Transcript Abundance, Contrasted Structuromes				Pearson Correlation		Shoot Control				Shoot Salt				Root Control				Root Salt
Sample	Region	Class	n	r	p	whole	5’UTR	CDS	3’UTR	whole	5’UTR	CDS	3’UTR	whole	5’UTR	CDS	3’UTR	whole	5’UTR	CDS	3’UTR
Shoot Control	whole	Contrasted	15875	0.758335	< 2.2e-16	1	0	0	0	0	0	0	0	0.3304	0	0	0	0	0	0	0
	5'UTR	Contrasted	14435	0.314468	< 2.2e-16	0	1	0	0.0163	0	0.082	0	0.0005	0	0.0045	0	0.0397	0	0.0002	0	0.0112
	CDS	Contrasted	15719	0.710507	< 2.2e-16	0	0	1	0	0	0	0	0	0	0	0	0	0	0	0	0
	3'UTR	Contrasted	14393	0.288748	< 2.2e-16	0	0.0163	0	1	0	0.5066	0	0.2708	0	0	0	0	0	0	0	0.8879
Shoot Salt	whole	Contrasted	15875	0.607269	< 2.2e-16	0	0	0	0	1	0	0.0003	0	0	0	0	0	0.1587	0	0	0
	5'UTR	Contrasted	14435	0.295903	< 2.2e-16	0	0.082	0	0.5066	0	1	0	0.0774	0	0	0	0.0002	0	0	0	0.4219
	CDS	Contrasted	15719	0.580799	< 2.2e-16	0	0	0	0	0.0003	0	1	0	0	0	0	0	0.0263	0	0.0009	0
	3'UTR	Contrasted	14393	0.276803	< 2.2e-16	0	0.0005	0	0.2708	0	0.0774	0	1	0	0	0	0	0	0	0	0.3387
Root Control	whole	Contrasted	15725	0.762951	< 2.2e-16	0.3304	0	0	0	0	0	0	0	1	0	0	0	0	0	0	0
	5'UTR	Contrasted	14334	0.344317	< 2.2e-16	0	0.0045	0	0	0	0	0	0	0	1	0	0.4383	0	0.3787	0	0
	CDS	Contrasted	15570	0.686854	< 2.2e-16	0	0	0	0	0	0	0	0	0	0	1	0	0	0	0	0
	3'UTR	Contrasted	14213	0.336203	< 2.2e-16	0	0.0397	0	0	0	0.0002	0	0	0	0.4383	0	1	0	0.0982	0	0
Root Salt	whole	Contrasted	15725	0.597162	< 2.2e-16	0	0	0	0	0.1587	0	0.0263	0	0	0	0	0	1	0	0	0
	5'UTR	Contrasted	14334	0.35345	< 2.2e-16	0	0.0002	0	0	0	0	0	0	0	0.3787	0	0.0982	0	1	0	0
	CDS	Contrasted	15570	0.555291	< 2.2e-16	0	0	0	0	0	0	0.0009	0	0	0	0	0	0	0	1	0
	3'UTR	Contrasted	14213	0.287219	< 2.2e-16	0	0.0112	0	0.8879	0	0.4219	0	0.3387	0	0	0	0	0	0	0	1
S8C Categorical Change vs. Control Mean Transcript Abundance log2 (TPM)
Tissue	Metric	Data	Mean log2 TPM of Transcripts That Increase				Mean log2 TPM of Transcripts That Decrease				p
Shoot	∆ Reactivity	All	4.55846				3.611				< 2.2e-16
		5% extremes	5.77479				3.72692				< 2.2e-16
	∆ Abundance	All	3.65021				5.07167				< 2.2e-16
		5% extremes	3.03759				5.88998				< 2.2e-16
Root	∆ Reactivity	All	4.59326				4.0417				< 2.2e-16
		5% extremes	6.13562				4.3889				< 2.2e-16
	∆ Abundance	All	4.52986				4.4648				0.07336
		5% extremes	4.35265				5.25645				< 2.2e-16
S8D Downscale Analysis in Shoot Control
Downscale Type	Downscale Factor	Mean Reactivity of 100 Most Abundant Transcripts, Downscaled				Mean Reactivity, Everything Else			t-test p
None	1	0.369681				0.274822			< 2.2e-16
Percent	0.5	0.364304				0.274822			< 2.2e-16
Percent	0.25	0.355362				0.274822			< 2.2e-16
Percent	0.125	0.344647				0.274822			< 2.2e-16
Random	0.5	0.364304				0.274822			< 2.2e-16
Random	0.25	0.355362				0.274822			< 2.2e-16
Random	0.125	0.344647				0.274822			< 2.2e-16
