# Supplementary material
Source: HighWire-hosted journal article supplement (doi:10.1101/rna.072850.119)
Supplement: Supplemental_Data_4.xlsx [file Supplemental_Data_4.xlsx]

## Sheet: G0
G0 Index of GO tables
Table	Contents
G0	Index	Query Total
G1	shoot_control_x_shoot_salt_all_whole_top_5p_average	570
G2	shoot_control_x_shoot_salt_all_whole_bot_5p_average	608
G3	shoot_control_x_shoot_salt_all_FPUTR_top_5p_average	603
G4	shoot_control_x_shoot_salt_all_FPUTR_bot_5p_average	603
G5	shoot_control_x_shoot_salt_all_CDS_top_5p_average	573
G6	shoot_control_x_shoot_salt_all_CDS_bot_5p_average	614
G7	shoot_control_x_shoot_salt_all_TPUTR_top_5p_average	560
G8	shoot_control_x_shoot_salt_all_TPUTR_bot_5p_average	571
G9	root_control_x_root_salt_all_whole_top_5p_average	598
G10	root_control_x_root_salt_all_whole_bot_5p_average	614
G11	root_control_x_root_salt_all_FPUTR_top_5p_average	614
G12	root_control_x_root_salt_all_FPUTR_bot_5p_average	591
G13	root_control_x_root_salt_all_CDS_top_5p_average	590
G14	root_control_x_root_salt_all_CDS_bot_5p_average	616
G15	root_control_x_root_salt_all_TPUTR_top_5p_average	550
G16	root_control_x_root_salt_all_TPUTR_bot_5p_average	561
G17	shoot_control_x_root_control_all_whole_top_5p_average	526
G18	shoot_control_x_root_control_all_whole_bot_5p_average	529
G19	shoot_control_x_root_control_all_FPUTR_top_5p_average	517
G20	shoot_control_x_root_control_all_FPUTR_bot_5p_average	533
G21	shoot_control_x_root_control_all_CDS_top_5p_average	514
G22	shoot_control_x_root_control_all_CDS_bot_5p_average	524
G23	shoot_control_x_root_control_all_TPUTR_top_5p_average	522
G24	shoot_control_x_root_control_all_TPUTR_bot_5p_average	487
G25	shoot_salt_x_root_salt_all_whole_top_5p_average	521
G26	shoot_salt_x_root_salt_all_whole_bot_5p_average	512
G27	shoot_salt_x_root_salt_all_FPUTR_top_5p_average	515
G28	shoot_salt_x_root_salt_all_FPUTR_bot_5p_average	521
G29	shoot_salt_x_root_salt_all_CDS_top_5p_average	513
G30	shoot_salt_x_root_salt_all_CDS_bot_5p_average	517
G31	shoot_salt_x_root_salt_all_TPUTR_top_5p_average	505
G32	shoot_salt_x_root_salt_all_TPUTR_bot_5p_average	469
G33	Shoot_Concordant_Abundance_Up_Reactivity_Down (Protected)	1351
G34	Shoot_Concordant_Abundance_Down_Reactivity_Up (Exposed)	643
G35	Root_Concordant_Abundance_Up_Reactivity_Down (Protected)	291
G36	Root_Concordant_Abundance_Down_Reactivity_Up (Exposed)	1829
G37	Shoot PPV Top 5 Percent (Most Conserved between Treatments)	708
G38	Shoot PPV Bottom 5 Percent (Least Conserved between Treatments)	713
G39	Root PPV Top 5 Percent (Most Conserved between Treatments)	692
G40	Root PPV Bottom 5 Percent (Least Conserved between Treatments)	716
Column	What it is
queryitem	How many of this category were found in query set
querytotal	How many total items were in the query set
bgitem	How many items of this category are in the background
bgtotal	How many total items there are in the background

## Sheet: G1
G1 shoot_control_x_shoot_salt_all_whole_top_5p_average
GO_acc	term_type	Term	queryitem	querytotal	bgitem	bgtotal	pvalue	FDR	entries
GO:0015979	P	photosynthesis	44	570	253	28362	1.5e-25	4.4e-22	// AT1G29930 // AT4G05180 // AT4G02770 // AT1G75690 // AT5G64040 // AT1G06680 // ATCG00220 // AT1G52230 // AT4G28750 // AT2G05100 // AT2G34420 // AT5G52100 // AT1G29910 // AT1G49975 // AT1G20020 // AT5G23120 // AT4G21280 // AT1G16720 // AT5G13630 // AT3G01480 // AT1G29920 // AT4G33520 // AT2G39470 // AT3G54890 // AT1G15820 // AT3G01500 // AT1G30380 // AT3G47470 // AT5G52520 // AT4G23890 // AT3G08…
GO:0050896	P	response to stimulus	214	570	6250	28362	8.4e-17	1.2e-13	// AT1G29930 // AT5G57660 // AT3G04210 // AT5G02290 // AT3G50950 // AT4G24275 // AT1G23130 // AT1G80920 // AT1G08930 // AT3G23050 // AT5G55160 // AT2G43010 // AT2G43910 // AT1G69040 // AT4G35770 // AT1G20020 // AT1G55490 // AT1G48480 // AT2G16850 // AT4G04695 // AT4G23810 // AT1G29920 // AT4G08950 // AT1G66180 // AT5G01810 // AT4G24230 // AT5G20250 // AT1G33600 // AT5G06690 // AT4G23180 // AT3G62…
GO:0009768	P	photosynthesis, light harvesting in photosystem I	14	570	23	28362	4.6e-15	4.5e-12	// AT1G29930 // AT1G29920 // AT3G08940 // AT2G05070 // AT3G54890 // AT1G29910 // AT1G15820 // AT2G05100 // AT1G61520 // AT2G34420 // AT3G47470 // AT4G10340 // AT2G34430 // AT5G54270
GO:0019684	P	photosynthesis, light reaction	24	570	134	28362	9.3e-15	6.9e-12	// AT1G29930 // AT1G29910 // AT1G75690 // AT5G64040 // AT1G06680 // AT2G05100 // AT2G34420 // AT5G52100 // AT1G16720 // AT3G01480 // AT1G29920 // AT4G33520 // AT3G54890 // AT1G15820 // AT3G47470 // AT4G23890 // AT3G08940 // AT2G34430 // AT2G05070 // AT3G21200 // ATCG00220 // AT1G61520 // AT4G10340 // AT5G54270
GO:0042221	P	response to chemical	118	570	2853	28362	7.9e-14	4.1e-11	// AT4G24275 // AT3G16530 // AT1G08930 // AT3G23050 // AT2G43010 // AT1G69040 // AT4G35770 // AT1G20020 // AT5G63310 // AT4G04695 // AT4G23810 // AT1G29920 // AT1G66180 // AT5G01810 // AT5G20250 // AT5G23120 // AT5G06690 // AT4G31550 // AT3G12955 // AT1G77490 // AT3G10040 // AT2G20260 // AT3G25070 // AT3G04730 // AT1G12580 // AT3G15540 // AT1G79700 // AT2G29630 // AT3G52400 // AT5G14920 // AT4G37…
GO:0009628	P	response to abiotic stimulus	94	570	2022	28362	8.4e-14	4.1e-11	// AT1G29930 // AT5G57660 // AT4G24275 // AT1G80920 // AT1G08930 // AT3G23050 // AT2G43010 // AT4G35770 // AT1G55490 // AT5G63310 // AT3G09260 // AT1G29920 // AT1G66180 // AT3G54560 // AT5G20250 // AT1G77490 // AT3G10040 // AT5G14920 // AT3G15540 // AT3G13790 // AT3G01500 // AT3G56710 // AT3G57520 // AT1G29910 // AT5G07440 // AT5G08050 // AT5G18170 // AT1G75040 // AT3G19850 // AT1G35140 // AT4G30…
GO:0009765	P	photosynthesis, light harvesting	15	570	44	28362	3.9e-13	1.6e-10	// AT1G29930 // AT1G29920 // AT3G08940 // AT2G05070 // AT3G54890 // AT1G75690 // AT1G29910 // AT1G15820 // AT2G05100 // AT1G61520 // AT2G34420 // AT3G47470 // AT4G10340 // AT2G34430 // AT5G54270
GO:0018298	P	protein-chromophore linkage	15	570	46	28362	6.7e-13	2.5e-10	// AT1G29930 // AT1G29920 // AT3G08940 // AT2G05070 // AT3G54890 // AT1G29910 // AT1G15820 // AT3G45780 // AT2G05100 // AT1G61520 // AT2G34420 // AT3G47470 // AT4G10340 // AT2G34430 // AT5G54270
GO:0009814	P	defense response, incompatible interaction	24	570	170	28362	9.5e-13	3.1e-10	// ATCG00480 // AT4G20380 // AT5G64570 // AT3G14840 // AT1G75040 // AT3G63190 // AT1G20020 // AT1G55490 // AT4G16950 // AT4G14400 // AT4G23810 // AT5G48485 // AT4G16990 // AT3G01500 // AT3G15356 // AT3G56400 // AT1G09750 // AT3G25070 // AT4G11850 // AT4G16860 // AT2G44490 // AT1G64280 // AT3G04720 // AT3G56710
GO:0010033	P	response to organic substance	90	570	2023	28362	3.2e-12	9.4e-10	// AT3G16530 // AT1G08930 // AT3G23050 // AT2G43010 // AT1G69040 // AT4G35770 // AT1G20020 // AT5G63310 // AT4G04695 // AT4G23810 // AT1G29920 // AT1G66180 // AT5G01810 // AT5G20250 // AT5G23120 // AT3G06850 // AT4G31550 // AT3G12955 // AT2G20260 // AT3G25070 // AT3G04730 // AT1G12580 // AT3G15540 // AT1G79700 // AT2G29630 // AT1G64280 // AT3G52400 // AT5G14920 // AT4G37260 // AT1G28330 // AT5G14…
GO:0006950	P	response to stress	129	570	3506	28362	1.3e-11	3.5e-09	// AT2G43910 // AT3G04210 // AT5G02290 // AT3G50950 // AT4G24275 // AT1G23130 // AT1G08930 // AT3G23050 // AT5G55160 // AT4G35770 // AT1G20020 // AT1G55490 // AT4G16950 // AT5G63310 // AT3G09260 // AT4G23810 // AT2G41430 // AT3G54560 // AT5G20250 // AT3G10040 // AT4G23180 // AT1G77490 // AT1G09750 // AT3G25070 // AT3G52400 // AT5G14920 // AT3G13790 // AT3G56710 // AT3G57520 // AT5G07440 // AT3G05…
GO:0045087	P	innate immune response	30	570	323	28362	2.5e-11	6.2e-09	// AT4G19530 // ATCG00480 // AT4G16860 // AT4G20380 // AT3G45640 // AT5G64570 // AT2G26560 // AT3G14840 // AT1G75040 // AT3G63190 // AT1G20020 // AT1G55490 // AT4G16950 // AT4G14400 // AT4G23810 // AT5G48485 // AT4G16990 // AT3G50480 // AT3G01500 // AT3G15356 // AT3G56400 // AT1G09750 // AT3G25070 // AT4G11850 // AT3G52400 // AT4G39260 // AT2G44490 // AT1G64280 // AT3G04720 // AT3G56710
GO:0006955	P	immune response	30	570	333	28362	5e-11	1.1e-08	// AT4G19530 // ATCG00480 // AT4G16860 // AT4G20380 // AT3G45640 // AT5G64570 // AT2G26560 // AT3G14840 // AT1G75040 // AT3G63190 // AT1G20020 // AT1G55490 // AT4G16950 // AT4G14400 // AT4G23810 // AT5G48485 // AT4G16990 // AT3G50480 // AT3G01500 // AT3G15356 // AT3G56400 // AT1G09750 // AT3G25070 // AT4G11850 // AT3G52400 // AT4G39260 // AT2G44490 // AT1G64280 // AT3G04720 // AT3G56710
GO:0009605	P	response to external stimulus	72	570	1582	28362	2.5e-10	5.2e-08	// AT3G54560 // AT2G43535 // AT3G01480 // AT3G57330 // AT5G21170 // ATCG00480 // AT3G05730 // AT5G23010 // AT4G19840 // AT1G06680 // AT5G63310 // AT4G20380 // AT3G45640 // AT1G67865 // AT3G23050 // AT5G57560 // AT2G26560 // AT2G43010 // AT3G14840 // AT2G27190 // AT2G01340 // AT3G01290 // AT3G05727 // AT4G24230 // AT3G63190 // AT1G20020 // AT1G55490 // AT2G41430 // AT4G16950 // AT5G61210 // AT2G15…
GO:0002376	P	immune system process	30	570	369	28362	4.9e-10	9.7e-08	// AT4G19530 // ATCG00480 // AT4G16860 // AT4G20380 // AT3G45640 // AT5G64570 // AT2G26560 // AT3G14840 // AT1G75040 // AT3G63190 // AT1G20020 // AT1G55490 // AT4G16950 // AT4G14400 // AT4G23810 // AT5G48485 // AT4G16990 // AT3G50480 // AT3G01500 // AT3G15356 // AT3G56400 // AT1G09750 // AT3G25070 // AT4G11850 // AT3G52400 // AT4G39260 // AT2G44490 // AT1G64280 // AT3G04720 // AT3G56710
GO:0009719	P	response to endogenous stimulus	75	570	1732	28362	8.5e-10	1.6e-07	// AT2G42580 // AT5G54500 // AT4G08950 // AT3G15540 // AT5G63310 // AT4G20380 // AT1G62380 // AT3G45640 // AT1G08930 // AT3G23050 // AT5G57560 // AT2G43010 // AT2G38310 // AT5G61590 // AT5G38480 // AT2G29630 // AT4G37610 // AT5G14910 // AT1G20020 // AT3G48360 // AT5G23120 // AT4G35310 // AT2G16850 // AT3G04730 // AT4G04695 // AT1G52230 // ATCG00780 // AT4G23810 // AT3G63140 // AT3G16720 // AT1G69…
GO:0006091	P	generation of precursor metabolites and energy	29	570	364	28362	1.5e-09	2.6e-07	// AT1G29930 // AT5G19220 // AT1G29910 // AT4G26530 // AT5G64040 // AT1G06680 // AT5G23250 // AT2G05100 // AT2G34420 // AT5G52100 // AT1G75690 // AT2G36390 // AT1G16720 // AT3G01480 // AT1G29920 // AT4G33520 // AT3G54890 // AT1G15820 // AT3G47470 // AT4G23890 // AT3G08940 // AT2G34430 // AT2G05070 // AT3G21200 // ATCG00220 // AT3G10020 // AT1G61520 // AT4G10340 // AT5G54270
GO:0009416	P	response to light stimulus	43	570	744	28362	2.2e-09	3.7e-07	// AT1G29930 // AT5G57660 // AT1G29910 // AT1G80920 // AT1G29920 // AT2G41100 // AT4G24230 // AT3G45640 // AT5G08050 // AT5G18170 // AT2G43010 // AT2G34420 // AT5G24470 // AT3G08940 // AT2G16365 // AT4G35770 // AT1G75040 // AT3G19850 // AT1G51400 // AT5G02810 // AT2G41430 // AT5G63310 // AT4G14400 // AT3G45780 // AT3G54890 // AT1G66180 // AT1G15820 // AT1G14280 // AT5G54720 // AT3G47470 // AT5G20…
GO:1901700	P	response to oxygen-containing compound	68	570	1557	28362	4.1e-09	6.4e-07	// AT2G42580 // AT5G21170 // AT5G23010 // AT5G16470 // AT4G08950 // AT4G24275 // AT1G64280 // AT4G37610 // AT3G45640 // AT1G08930 // AT3G23050 // AT5G57560 // AT1G22690 // AT1G28330 // AT5G61590 // AT1G62380 // AT4G35770 // AT5G65730 // AT1G51400 // AT2G05100 // AT2G38310 // AT3G48360 // AT1G66180 // AT4G35310 // AT1G76680 // AT4G14400 // AT4G04695 // AT4G23810 // AT1G29920 // AT3G16720 // AT2G41…
GO:0009314	P	response to radiation	43	570	772	28362	6.3e-09	9.2e-07	// AT1G29930 // AT5G57660 // AT1G29910 // AT1G80920 // AT1G29920 // AT2G41100 // AT4G24230 // AT3G45640 // AT5G08050 // AT5G18170 // AT2G43010 // AT2G34420 // AT5G24470 // AT3G08940 // AT2G16365 // AT4G35770 // AT1G75040 // AT3G19850 // AT1G51400 // AT5G02810 // AT2G41430 // AT5G63310 // AT4G14400 // AT3G45780 // AT3G54890 // AT1G66180 // AT1G15820 // AT1G14280 // AT5G54720 // AT3G47470 // AT5G20…
GO:0009987	P	cellular process	325	570	12771	28362	8.7e-09	1.2e-06	// AT1G29930 // AT4G05180 // AT5G57660 // AT4G03210 // AT5G16470 // AT3G04210 // AT3G62910 // AT4G21280 // AT5G02290 // AT3G50950 // AT5G19530 // AT5G67560 // AT3G15520 // AT2G04842 // AT5G19220 // AT1G80920 // AT5G08050 // AT2G47220 // AT5G55160 // AT4G23180 // AT2G43010 // AT2G43910 // AT4G14342 // AT1G69040 // AT2G19620 // AT1G05805 // AT2G18710 // AT1G74270 // AT2G31810 // AT4G30220 // AT1G20…
GO:0051707	P	response to other organism	56	570	1210	28362	1.7e-08	2.3e-06	// AT3G54560 // AT3G01480 // AT3G57330 // ATCG00480 // AT4G16860 // AT5G23010 // AT4G19840 // AT1G06680 // AT5G44070 // AT4G20380 // AT3G45640 // AT1G67865 // AT5G64570 // AT2G26560 // AT3G05727 // AT3G14840 // AT4G23180 // AT2G01340 // AT3G01290 // AT4G24230 // AT3G63190 // AT1G20020 // AT1G55490 // AT5G48485 // AT4G16950 // AT5G61210 // AT2G15890 // AT4G31550 // AT4G14400 // AT3G09260 // AT1G16…
GO:0043207	P	response to external biotic stimulus	56	570	1212	28362	1.8e-08	2.3e-06	// AT3G54560 // AT3G01480 // AT3G57330 // ATCG00480 // AT4G16860 // AT5G23010 // AT4G19840 // AT1G06680 // AT5G44070 // AT4G20380 // AT3G45640 // AT1G67865 // AT5G64570 // AT2G26560 // AT3G05727 // AT3G14840 // AT4G23180 // AT2G01340 // AT3G01290 // AT4G24230 // AT3G63190 // AT1G20020 // AT1G55490 // AT5G48485 // AT4G16950 // AT5G61210 // AT2G15890 // AT4G31550 // AT4G14400 // AT3G09260 // AT1G16…
GO:0009607	P	response to biotic stimulus	57	570	1253	28362	2.2e-08	2.7e-06	// AT3G54560 // AT3G01480 // AT3G57330 // ATCG00480 // AT4G16860 // AT5G23010 // AT4G19840 // AT1G06680 // AT5G44070 // AT1G23130 // AT4G20380 // AT3G45640 // AT1G67865 // AT5G64570 // AT2G26560 // AT3G05727 // AT3G14840 // AT4G23180 // AT2G01340 // AT3G01290 // AT4G24230 // AT3G63190 // AT1G20020 // AT1G55490 // AT5G48485 // AT4G16950 // AT5G61210 // AT2G15890 // AT4G31550 // AT4G14400 // AT3G09…
GO:0009725	P	response to hormone	67	570	1631	28362	5.2e-08	6.1e-06	// AT2G42580 // AT5G54500 // AT3G15540 // AT5G63310 // AT4G20380 // AT3G45640 // AT1G08930 // AT3G23050 // AT5G57560 // AT2G43010 // AT2G38310 // AT5G61590 // AT4G35770 // AT4G37610 // AT5G14910 // AT1G20020 // AT3G48360 // AT5G23120 // AT4G35310 // AT2G16850 // AT3G04730 // AT4G04695 // AT1G52230 // ATCG00780 // AT3G63140 // AT1G69040 // AT4G28750 // AT1G75500 // AT5G01810 // AT2G18300 // AT3G27…
GO:0006952	P	defense response	65	570	1566	28362	5.8e-08	6.6e-06	// AT2G43910 // AT4G19530 // AT3G04210 // AT3G57330 // ATCG00480 // AT5G02290 // AT3G50950 // AT3G07780 // AT5G44070 // AT1G23130 // AT4G20380 // AT3G45640 // AT1G67865 // AT5G64570 // AT2G07180 // AT2G26560 // AT3G14840 // AT4G23180 // AT3G05727 // AT1G62380 // AT3G01290 // AT4G24230 // AT3G63190 // AT1G20020 // AT1G66100 // AT1G55490 // AT5G48485 // AT4G16950 // AT2G15890 // AT4G31550 // AT4G14…
GO:0009817	P	defense response to fungus, incompatible interaction	10	570	47	28362	1.5e-07	1.7e-05	// AT3G01500 // ATCG00480 // AT4G16990 // AT3G63190 // AT1G20020 // AT3G15356 // AT2G44490 // AT4G16950 // AT3G04720 // AT4G16860
GO:0098542	P	defense response to other organism	45	570	936	28362	1.7e-07	1.8e-05	// AT3G54560 // AT3G01480 // AT3G57330 // ATCG00480 // AT4G16860 // AT1G06680 // AT5G44070 // AT4G20380 // AT1G67865 // AT5G64570 // AT2G26560 // AT3G14840 // AT4G23180 // AT3G05727 // AT3G01290 // AT4G24230 // AT3G63190 // AT1G20020 // AT1G55490 // AT4G16950 // AT2G15890 // AT4G31550 // AT4G14400 // AT1G16410 // AT4G23810 // AT5G48485 // AT4G16990 // AT3G30775 // AT3G01500 // AT3G15356 // AT3G05…
GO:0009617	P	response to bacterium	28	570	441	28362	2.5e-07	2.6e-05	// AT3G01480 // AT3G57330 // AT1G06680 // AT5G44070 // AT3G45640 // AT4G24230 // AT3G63190 // AT1G20020 // AT4G31550 // AT4G14400 // AT4G23810 // AT2G41430 // AT3G54560 // AT3G30775 // AT3G50480 // AT3G01500 // AT3G27850 // AT3G56400 // AT5G57490 // AT4G23180 // AT3G25070 // AT2G26440 // AT4G11850 // AT2G29630 // AT2G44490 // AT1G64280 // AT3G04720 // AT3G56710
GO:0010200	P	response to chitin	15	570	134	28362	2.8e-07	2.8e-05	// AT4G23810 // AT5G03720 // AT4G17490 // AT3G16720 // AT4G37610 // AT4G01250 // AT1G08930 // AT3G15356 // AT5G51190 // AT3G56400 // AT3G45640 // AT4G33050 // AT3G16530 // AT4G31550 // AT4G37260
GO:0009266	P	response to temperature stimulus	32	570	559	28362	3.2e-07	3.1e-05	// AT1G35680 // ATCG00480 // AT5G18620 // AT2G41100 // AT5G49910 // AT3G45640 // AT5G57560 // AT2G05100 // AT4G34150 // AT4G37610 // AT5G02810 // AT3G48360 // AT1G55490 // AT5G38480 // AT4G14400 // AT3G09260 // AT4G30660 // AT2G05070 // AT3G54890 // AT3G54560 // AT5G20250 // AT3G01500 // AT5G03720 // AT2G33800 // AT3G47470 // AT4G21870 // AT1G77490 // AT3G08920 // AT4G39260 // AT1G61520 // AT1G64…
GO:0008152	P	metabolic process	301	570	12035	28362	5.2e-07	4.8e-05	// AT1G29930 // AT1G13110 // AT4G05180 // AT5G57660 // AT4G03210 // AT5G16470 // AT1G75690 // AT4G21280 // AT5G02290 // AT1G03400 // AT5G19530 // AT3G58120 // AT3G26180 // AT2G04842 // AT5G19220 // AT5G08050 // AT2G47220 // AT5G55160 // AT4G23180 // AT2G43010 // AT4G14342 // AT1G69040 // AT1G05805 // AT1G74270 // AT2G31810 // AT5G44680 // AT4G30220 // AT1G20020 // AT2G02570 // AT1G21120 // AT5G47…
GO:0009657	P	plastid organization	18	570	207	28362	6e-07	5.4e-05	// AT3G45780 // AT3G48870 // AT3G63140 // AT1G35680 // AT3G56940 // AT2G18710 // AT3G62910 // AT4G38160 // AT3G63190 // AT2G30170 // AT5G55280 // AT2G33800 // AT5G08050 // AT5G23120 // AT2G16365 // AT2G28000 // AT4G38470 // AT3G56910
GO:0010243	P	response to organonitrogen compound	16	570	166	28362	7.2e-07	6.3e-05	// AT4G23810 // AT5G03720 // AT4G17490 // AT2G29630 // AT3G16720 // AT4G37610 // AT4G01250 // AT1G08930 // AT3G15356 // AT5G51190 // AT3G56400 // AT3G45640 // AT4G33050 // AT3G16530 // AT4G31550 // AT4G37260
GO:0006979	P	response to oxidative stress	27	570	453	28362	1.3e-06	0.00011	// AT3G57520 // AT1G64360 // AT1G49300 // AT4G20380 // AT3G45640 // AT1G71695 // AT4G35770 // AT4G37610 // AT3G48360 // AT5G63310 // AT4G23810 // AT5G16470 // AT1G77490 // AT2G14170 // AT3G30775 // AT5G20250 // AT2G25080 // AT2G37130 // AT5G06690 // AT4G17490 // AT4G11850 // AT1G62380 // AT1G19020 // AT3G10020 // AT1G51400 // AT4G09010 // AT4G04840
GO:1901564	P	organonitrogen compound metabolic process	87	570	2569	28362	1.7e-06	0.00014	// AT3G44890 // AT5G19530 // AT2G04842 // AT1G69040 // AT5G52100 // AT2G31810 // AT1G21120 // AT5G47190 // AT4G25890 // AT3G09260 // AT3G56910 // AT3G49680 // AT1G03090 // AT1G48350 // AT2G35500 // AT2G29630 // AT1G16720 // AT4G30690 // AT3G10610 // AT5G07440 // AT5G44070 // AT2G43030 // AT3G56020 // AT5G18170 // AT3G58610 // AT1G21100 // AT5G14660 // AT3G63190 // AT3G48730 // AT5G46160 // ATCG00…
GO:0009735	P	response to cytokinin	18	570	244	28362	5.3e-06	0.00042	// AT1G19770 // AT5G14910 // AT3G63140 // AT2G20260 // AT3G08940 // AT1G69040 // AT1G62380 // AT4G39260 // AT3G27850 // AT2G18300 // AT1G20020 // AT1G52230 // AT1G61520 // AT5G23120 // AT1G05190 // AT4G28750 // AT3G09260 // ATCG00780
GO:0044237	P	cellular metabolic process	250	570	9879	28362	6.4e-06	0.00049	// AT1G29930 // AT4G05180 // AT5G57660 // AT4G03210 // AT1G75690 // AT4G21280 // AT5G02290 // AT3G44890 // AT5G19530 // AT3G58120 // AT2G04842 // AT5G19220 // AT5G08050 // AT2G47220 // AT5G55160 // AT2G43010 // AT4G14342 // AT1G69040 // AT1G05805 // AT1G74270 // AT2G31810 // AT4G30220 // AT1G20020 // AT2G02570 // AT1G21120 // AT5G47190 // AT5G16370 // AT1G48480 // AT4G25890 // AT3G09260 // AT3G56…
GO:0042742	P	defense response to bacterium	22	570	354	28362	6.7e-06	0.00051	// AT4G23810 // AT3G57330 // AT1G06680 // AT5G44070 // AT4G24230 // AT3G63190 // AT1G20020 // AT4G23180 // AT4G14400 // AT3G01480 // AT3G54560 // AT3G30775 // AT3G01500 // AT3G27850 // AT3G56400 // AT4G31550 // AT3G25070 // AT4G11850 // AT2G44490 // AT1G64280 // AT3G04720 // AT3G56710
GO:0009769	P	photosynthesis, light harvesting in photosystem II	5	570	10	28362	7.4e-06	0.00051	// AT2G05070 // AT2G34420 // AT2G34430 // AT5G54270 // AT2G05100
GO:0009645	P	response to low light intensity stimulus	6	570	19	28362	7.3e-06	0.00051	// AT2G05070 // AT3G54890 // AT2G05100 // AT1G61520 // AT3G47470 // AT2G43010
GO:0009409	P	response to cold	23	570	384	28362	7.4e-06	0.00051	// AT1G35680 // ATCG00480 // AT3G45640 // AT5G57560 // AT2G05100 // AT4G34150 // AT1G61520 // AT3G48360 // AT1G55490 // AT5G38480 // AT4G14400 // AT3G09260 // AT4G30660 // AT2G05070 // AT3G54890 // AT5G20250 // AT3G01500 // AT2G33800 // AT3G47470 // AT1G77490 // AT3G08920 // AT4G39260 // AT4G37610
GO:1901566	P	organonitrogen compound biosynthetic process	72	570	2076	28362	6.9e-06	0.00051	// AT1G64510 // AT3G10610 // ATCG00830 // ATCG00660 // ATCG00770 // AT5G62980 // ATCG00480 // AT3G45640 // AT5G08650 // AT5G19530 // AT5G44070 // AT2G43030 // AT2G04842 // AT3G56020 // AT3G63140 // AT1G32990 // AT3G58610 // AT1G07320 // AT3G62910 // ATCG01020 // AT1G35680 // AT5G52100 // ATCG00780 // AT3G21200 // AT3G55010 // AT2G31810 // AT5G14660 // AT3G63190 // AT5G47190 // AT3G19480 // ATCG01…
GO:0015995	P	chlorophyll biosynthetic process	9	570	61	28362	9.4e-06	0.00063	// AT4G25080 // AT3G14930 // AT3G21200 // AT3G03710 // AT3G56940 // AT4G27440 // AT1G74470 // AT3G48730 // AT5G13630
GO:0009637	P	response to blue light	10	570	81	28362	1.3e-05	0.00082	// AT3G45780 // AT3G08940 // AT2G05100 // AT3G54890 // AT1G29920 // AT1G14280 // AT5G55280 // AT4G10340 // AT2G43010 // AT3G15540
GO:1901698	P	response to nitrogen compound	18	570	264	28362	1.4e-05	0.00092	// AT4G23810 // AT5G03720 // AT4G17490 // AT2G29630 // AT1G62380 // AT3G16720 // AT4G37610 // AT4G01250 // AT1G08930 // AT3G15356 // AT3G48360 // AT5G51190 // AT3G56400 // AT3G45640 // AT4G33050 // AT3G16530 // AT4G31550 // AT4G37260
GO:0009642	P	response to light intensity	13	570	144	28362	1.5e-05	0.00092	// AT2G05070 // AT3G06850 // AT4G17490 // AT3G54890 // AT2G41430 // AT2G41100 // AT2G05100 // AT1G61520 // AT3G47470 // AT4G24230 // AT5G18170 // AT2G43010 // AT5G54270
GO:0032544	P	plastid translation	5	570	12	28362	1.5e-05	0.00092	// AT3G63140 // AT3G63190 // AT3G62910 // AT2G33800 // AT3G56910
GO:0051704	P	multi-organism process	59	570	1631	28362	1.6e-05	0.00094	// AT3G54560 // AT3G01480 // AT3G57330 // ATCG00480 // AT4G16860 // AT5G23010 // AT3G44750 // AT4G19840 // AT3G07780 // AT5G44070 // AT4G20380 // AT3G45640 // AT1G67865 // AT5G64570 // AT2G26560 // AT3G05727 // AT3G14840 // AT4G23180 // AT2G01340 // AT3G01290 // AT4G24230 // AT3G63190 // AT1G20020 // AT1G55490 // AT5G48485 // AT4G16950 // AT5G61210 // AT2G15890 // AT4G31550 // AT4G14400 // AT3G09…
GO:0014070	P	response to organic cyclic compound	23	570	405	28362	1.6e-05	0.00097	// AT2G42580 // AT3G11700 // AT4G20380 // AT5G57560 // AT4G30270 // AT1G21270 // AT3G48360 // AT4G12730 // AT1G76680 // AT4G14400 // AT4G04695 // AT4G23810 // AT5G48485 // AT2G18300 // AT3G50480 // AT3G56400 // AT3G52400 // AT4G08950 // AT2G29630 // AT4G37610 // AT1G64280 // AT1G13260 // AT4G37260
GO:0009627	P	systemic acquired resistance	9	570	67	28362	1.9e-05	0.0011	// AT1G09750 // AT1G75040 // AT5G48485 // AT4G20380 // AT3G56400 // AT1G64280 // AT5G64570 // AT3G04720 // AT1G55490
GO:0006779	P	porphyrin-containing compound biosynthetic process	9	570	68	28362	2.1e-05	0.0012	// AT4G25080 // AT3G14930 // AT3G21200 // AT3G03710 // AT3G56940 // AT4G27440 // AT1G74470 // AT3G48730 // AT5G13630
GO:0033014	P	tetrapyrrole biosynthetic process	9	570	71	28362	2.8e-05	0.0016	// AT4G25080 // AT3G14930 // AT3G21200 // AT3G03710 // AT3G56940 // AT4G27440 // AT1G74470 // AT3G48730 // AT5G13630
GO:0070887	P	cellular response to chemical stimulus	45	570	1176	28362	4.8e-05	0.0026	// AT2G42580 // AT5G54500 // AT4G20380 // AT3G45640 // AT3G23050 // AT2G26560 // AT2G43010 // AT5G25250 // AT2G38310 // AT4G14400 // AT5G61590 // AT1G62380 // AT5G38480 // AT1G22690 // AT1G19770 // AT3G48360 // AT4G10100 // AT5G48485 // AT4G35310 // AT5G63310 // AT3G04730 // AT4G04695 // AT5G16470 // AT2G05070 // AT1G75500 // AT5G01810 // AT2G18300 // AT3G15356 // AT5G06690 // AT5G51190 // AT3G56…
GO:0001101	P	response to acid chemical	45	570	1181	28362	5.3e-05	0.0028	// AT5G23010 // AT4G24275 // AT4G20380 // AT4G37610 // AT3G45640 // AT1G08930 // AT3G23050 // AT1G22690 // AT5G61590 // AT4G35770 // AT1G51400 // AT2G05100 // AT2G38310 // AT3G48360 // AT2G41430 // AT4G35310 // AT2G16850 // AT4G14400 // AT4G04695 // AT4G23810 // AT5G65730 // AT1G66180 // AT5G48485 // AT5G01810 // AT2G18300 // AT3G30775 // AT3G50480 // AT1G64280 // AT3G15356 // AT3G56400 // AT5G66…
GO:0042343	P	indole glucosinolate metabolic process	6	570	30	28362	6.7e-05	0.0035	// AT1G21100 // AT5G44070 // AT1G21120 // AT2G44490 // AT3G56400 // AT3G09260
GO:0016143	P	S-glycoside metabolic process	6	570	30	28362	6.7e-05	0.0035	// AT1G21100 // AT5G44070 // AT1G21120 // AT2G44490 // AT3G56400 // AT3G09260
GO:0010114	P	response to red light	8	570	65	28362	9.4e-05	0.0047	// AT2G05070 // AT1G29920 // AT3G08940 // AT3G54890 // AT2G05100 // AT4G10340 // AT2G43010 // AT5G24470
GO:0009658	P	chloroplast organization	12	570	150	28362	9.4e-05	0.0047	// AT3G45780 // AT3G48870 // AT2G16365 // AT1G35680 // AT3G62910 // AT3G56940 // AT4G38160 // AT3G63190 // AT5G55280 // AT2G28000 // AT5G08050 // AT4G38470
GO:0015994	P	chlorophyll metabolic process	9	570	85	28362	0.0001	0.0049	// AT4G25080 // AT3G14930 // AT3G21200 // AT3G03710 // AT3G56940 // AT4G27440 // AT1G74470 // AT3G48730 // AT5G13630
GO:0010035	P	response to inorganic substance	37	570	926	28362	9.9e-05	0.0049	// AT5G07440 // AT5G23010 // AT5G44070 // AT4G20380 // AT5G49910 // AT1G08930 // AT5G18170 // AT3G23050 // AT2G26560 // AT2G05100 // AT3G58610 // AT5G61590 // AT1G62380 // AT1G75040 // AT5G65730 // AT4G37610 // AT3G48360 // AT5G23120 // AT5G63310 // AT4G23810 // AT5G16470 // AT3G14930 // AT2G41430 // AT3G30775 // AT2G33800 // AT2G39920 // AT2G05070 // AT1G76680 // AT4G24275 // AT4G11850 // AT5G19…
GO:0010119	P	regulation of stomatal movement	8	570	67	28362	0.00011	0.0054	// AT2G05070 // AT3G45780 // AT1G05805 // AT5G22920 // AT1G70410 // AT3G01500 // AT4G33050 // AT5G54270
GO:0009751	P	response to salicylic acid	14	570	209	28362	0.00015	0.007	// AT4G23810 // AT3G52400 // AT4G37610 // AT3G50480 // AT1G21270 // AT3G48360 // AT4G20380 // AT3G56400 // AT5G48485 // AT1G64280 // AT1G76680 // AT4G14400 // AT4G04695 // AT4G37260
GO:0032870	P	cellular response to hormone stimulus	35	570	879	28362	0.00016	0.0075	// AT2G42580 // AT5G54500 // AT4G20380 // AT3G45640 // AT3G23050 // AT2G43010 // AT2G38310 // AT5G61590 // AT1G22690 // AT1G19770 // AT3G48360 // AT4G10100 // AT4G35310 // AT5G63310 // AT3G04730 // AT4G04695 // AT1G75500 // AT5G01810 // AT2G18300 // AT3G15356 // AT5G51190 // AT3G56400 // AT4G06746 // AT5G66210 // AT2G05070 // AT5G38480 // AT4G17490 // AT3G52400 // AT1G12580 // AT3G15540 // AT1G79…
GO:0006082	P	organic acid metabolic process	41	570	1099	28362	0.00017	0.0079	// AT2G43910 // AT2G19800 // AT4G26530 // AT5G23010 // AT4G20380 // AT2G04842 // AT5G23250 // AT5G62980 // AT5G18170 // AT1G32470 // AT2G26560 // AT3G58610 // AT5G28020 // AT1G69040 // AT5G61590 // AT5G52100 // AT2G31810 // AT3G19480 // AT5G07440 // AT5G16370 // AT1G76680 // AT3G09260 // AT1G16410 // AT4G13830 // AT1G75500 // AT3G30775 // AT3G49680 // AT1G03090 // AT5G11670 // AT5G52520 // AT2G37…
GO:0071495	P	cellular response to endogenous stimulus	35	570	890	28362	0.0002	0.0091	// AT2G42580 // AT5G54500 // AT4G20380 // AT3G45640 // AT3G23050 // AT2G43010 // AT2G38310 // AT5G61590 // AT1G22690 // AT1G19770 // AT3G48360 // AT4G10100 // AT4G35310 // AT5G63310 // AT3G04730 // AT4G04695 // AT1G75500 // AT5G01810 // AT2G18300 // AT3G15356 // AT5G51190 // AT3G56400 // AT4G06746 // AT5G66210 // AT2G05070 // AT5G38480 // AT4G17490 // AT3G52400 // AT1G12580 // AT3G15540 // AT1G79…
GO:0009755	P	hormone-mediated signaling pathway	33	570	821	28362	0.00021	0.0093	// AT2G42580 // AT4G20380 // AT3G45640 // AT3G23050 // AT2G43010 // AT2G38310 // AT5G61590 // AT1G22690 // AT1G19770 // AT3G48360 // AT4G10100 // AT4G35310 // AT5G63310 // AT3G04730 // AT4G04695 // AT1G75500 // AT5G01810 // AT2G18300 // AT3G15356 // AT5G51190 // AT3G56400 // AT4G06746 // AT5G66210 // AT5G38480 // AT4G17490 // AT3G52400 // AT1G12580 // AT3G15540 // AT1G79700 // AT4G30270 // AT1G64…
GO:0009644	P	response to high light intensity	8	570	76	28362	0.00025	0.011	// AT2G05070 // AT4G17490 // AT3G54890 // AT2G41430 // AT1G61520 // AT3G47470 // AT2G05100 // AT5G54270
GO:0006778	P	porphyrin-containing compound metabolic process	9	570	97	28362	0.00025	0.011	// AT4G25080 // AT3G14930 // AT3G21200 // AT3G03710 // AT3G56940 // AT4G27440 // AT1G74470 // AT3G48730 // AT5G13630
GO:0043436	P	oxoacid metabolic process	37	570	973	28362	0.00025	0.011	// AT2G43910 // AT2G19800 // AT4G26530 // AT5G23010 // AT4G20380 // AT2G04842 // AT5G18170 // AT1G32470 // AT2G26560 // AT3G58610 // AT5G28020 // AT1G69040 // AT5G61590 // AT5G52100 // AT2G31810 // AT3G19480 // AT5G07440 // AT5G16370 // AT1G76680 // AT3G09260 // AT1G16410 // AT4G13830 // AT3G30775 // AT3G49680 // AT1G03090 // AT5G11670 // AT5G52520 // AT2G37500 // AT5G21170 // AT3G06850 // AT3G03…
GO:0033013	P	tetrapyrrole metabolic process	9	570	98	28362	0.00027	0.011	// AT4G25080 // AT3G14930 // AT3G21200 // AT3G03710 // AT3G56940 // AT4G27440 // AT1G74470 // AT3G48730 // AT5G13630
GO:0042430	P	indole-containing compound metabolic process	8	570	77	28362	0.00027	0.011	// AT1G21100 // AT1G75500 // AT5G44070 // AT1G21120 // AT2G44490 // AT3G56400 // AT3G45640 // AT3G09260
GO:0071310	P	cellular response to organic substance	38	570	1023	28362	0.00033	0.013	// AT2G42580 // AT5G54500 // AT4G20380 // AT3G45640 // AT3G23050 // AT2G43010 // AT2G38310 // AT4G14400 // AT5G61590 // AT1G62380 // AT1G22690 // AT1G19770 // AT3G48360 // AT4G10100 // AT5G48485 // AT4G35310 // AT5G63310 // AT3G04730 // AT4G04695 // AT1G75500 // AT5G01810 // AT2G18300 // AT3G15356 // AT5G51190 // AT3G56400 // AT4G06746 // AT5G66210 // AT2G05070 // AT5G38480 // AT4G17490 // AT3G52…
GO:0044281	P	small molecule metabolic process	53	570	1597	28362	0.00034	0.014	// AT2G43910 // AT1G75500 // AT2G19800 // AT5G21170 // ATCG00480 // AT5G62980 // AT5G63310 // AT4G24350 // AT4G20380 // AT2G04842 // AT5G23250 // AT5G07440 // AT5G18170 // AT3G55010 // AT2G26560 // AT3G58610 // AT5G28020 // AT1G69040 // AT5G61590 // AT5G52100 // AT5G66530 // AT2G31810 // AT3G19480 // AT4G26530 // AT5G16370 // AT1G76680 // AT3G09260 // AT1G16410 // AT4G13830 // AT3G10620 // AT5G57…
GO:0010218	P	response to far red light	7	570	60	28362	0.00035	0.014	// AT2G05070 // AT1G29920 // AT3G08940 // AT3G54890 // AT4G10340 // AT2G05100 // AT5G24470
GO:0050832	P	defense response to fungus	23	570	504	28362	0.00037	0.014	// ATCG00480 // AT4G16860 // AT1G67865 // AT4G24230 // AT3G05727 // AT3G01290 // AT3G63190 // AT1G20020 // AT4G16950 // AT2G15890 // AT4G14400 // AT4G16990 // AT3G01500 // AT3G15356 // AT3G56400 // AT3G16530 // AT2G37130 // AT3G05730 // AT3G52400 // AT2G43535 // AT2G44490 // AT1G64280 // AT3G04720
GO:0009620	P	response to fungus	25	570	573	28362	0.00039	0.015	// ATCG00480 // AT4G16860 // AT1G67865 // AT4G24230 // AT3G05727 // AT3G01290 // AT3G63190 // AT1G20020 // AT4G16950 // AT2G15890 // AT4G14400 // AT3G09260 // AT4G16990 // AT3G50480 // AT3G01500 // AT3G15356 // AT3G56400 // AT3G16530 // AT2G37130 // AT3G05730 // AT3G52400 // AT2G43535 // AT2G44490 // AT1G64280 // AT3G04720
GO:0006520	P	cellular amino acid metabolic process	17	570	320	28362	0.00042	0.016	// AT1G69040 // AT5G52100 // AT5G07440 // AT4G20380 // AT2G31810 // AT3G30775 // AT3G49680 // AT5G37600 // AT1G03090 // AT3G19480 // AT2G04842 // AT5G52520 // AT5G18170 // AT1G32470 // AT2G37500 // AT3G58610 // AT5G28020
GO:0001666	P	response to hypoxia	7	570	64	28362	0.0005	0.019	// AT5G25250 // AT3G10040 // AT4G24230 // AT4G20380 // AT1G64280 // AT2G26560 // AT1G35140
GO:0044763	P	single-organism cellular process	166	570	6591	28362	0.00077	0.028	// AT2G43910 // AT3G04210 // AT5G02290 // AT3G50950 // AT5G19530 // AT5G67560 // AT2G04842 // AT5G19220 // AT5G08050 // AT3G23050 // AT2G43010 // AT5G28020 // AT1G69040 // AT2G19620 // AT1G05805 // AT2G18710 // AT2G31810 // AT1G21120 // AT1G55490 // AT2G15390 // AT1G48480 // AT5G63310 // AT4G04695 // AT5G01810 // AT3G49680 // AT1G03090 // AT3G06850 // AT4G23890 // AT1G52290 // AT1G77490 // AT3G25…
GO:0000302	P	response to reactive oxygen species	11	570	166	28362	0.00081	0.029	// AT4G23810 // AT5G16470 // AT4G17490 // AT1G77490 // AT1G62380 // AT4G37610 // AT1G51400 // AT3G48360 // AT4G20380 // AT4G09010 // AT5G63310
GO:0036293	P	response to decreased oxygen levels	7	570	70	28362	0.00081	0.029	// AT5G25250 // AT3G10040 // AT4G24230 // AT4G20380 // AT1G64280 // AT2G26560 // AT1G35140
GO:0070482	P	response to oxygen levels	7	570	71	28362	0.00088	0.031	// AT5G25250 // AT3G10040 // AT4G24230 // AT4G20380 // AT1G64280 // AT2G26560 // AT1G35140
GO:0044699	P	single-organism process	226	570	9448	28362	0.00099	0.034	// AT2G43910 // AT1G13110 // AT5G57660 // AT3G04210 // AT5G02290 // AT2G33830 // AT3G50950 // AT5G19530 // AT5G67560 // AT3G26180 // AT2G04842 // AT5G19220 // AT5G08050 // AT1G08930 // AT3G23050 // AT2G43010 // AT5G28020 // AT1G69040 // AT2G19620 // AT1G05805 // AT4G35770 // AT2G18710 // AT2G31810 // AT1G20020 // AT1G21120 // AT1G55490 // ATCG00430 // AT1G48480 // AT4G13830 // AT5G63310 // AT4G04…
GO:0019752	P	carboxylic acid metabolic process	32	570	864	28362	0.00099	0.034	// AT2G19800 // AT4G26530 // AT5G23010 // AT4G20380 // AT2G04842 // AT5G18170 // AT1G32470 // AT2G26560 // AT3G58610 // AT5G28020 // AT1G69040 // AT5G52100 // AT2G31810 // AT3G19480 // AT5G07440 // AT5G16370 // AT1G76680 // AT1G16410 // AT4G13830 // AT3G30775 // AT3G49680 // AT1G03090 // AT5G11670 // AT5G52520 // AT2G37500 // AT5G21170 // AT3G06850 // AT3G03710 // AT5G28840 // AT1G79700 // AT2G15…
GO:0007568	P	aging	11	570	174	28362	0.0012	0.04	// AT4G23810 // AT4G35770 // AT1G64360 // AT5G20250 // AT4G30270 // AT5G51720 // AT3G56400 // AT4G01250 // AT5G37600 // AT4G36730 // AT1G76680
GO:0046148	P	pigment biosynthetic process	10	570	148	28362	0.0012	0.041	// AT4G25080 // AT3G14930 // AT1G75040 // AT3G21200 // AT3G03710 // AT3G56940 // AT4G27440 // AT1G74470 // AT3G48730 // AT5G13630
GO:0071229	P	cellular response to acid chemical	21	570	485	28362	0.0012	0.041	// AT5G66210 // AT2G05070 // AT1G62380 // AT3G52400 // AT1G12580 // AT5G14920 // AT5G01810 // AT2G18300 // AT1G22690 // AT2G38310 // AT4G30270 // AT3G15356 // AT3G48360 // AT4G20380 // AT3G56400 // AT3G45640 // AT1G64280 // AT4G35310 // AT4G14400 // AT4G04695 // AT5G48485
GO:0009863	P	salicylic acid mediated signaling pathway	6	570	56	28362	0.0014	0.046	// AT3G52400 // AT4G20380 // AT3G56400 // AT5G48485 // AT1G64280 // AT4G14400
GO:0010411	P	xyloglucan metabolic process	6	570	57	28362	0.0015	0.049	// AT4G03210 // AT5G65730 // AT2G15390 // AT4G30270 // AT1G32170 // AT5G57560
GO:0010027	P	thylakoid membrane organization	5	570	38	28362	0.0015	0.049	// AT2G30170 // AT2G18710 // AT3G62910 // AT1G35680 // AT5G08050
GO:1901607	P	alpha-amino acid biosynthetic process	10	570	154	28362	0.0016	0.051	// AT5G52100 // AT5G28020 // AT2G31810 // AT3G30775 // AT3G49680 // AT3G19480 // AT1G75500 // AT5G37600 // AT2G37500 // AT3G58610
GO:0009668	P	plastid membrane organization	5	570	39	28362	0.0017	0.053	// AT2G30170 // AT2G18710 // AT3G62910 // AT1G35680 // AT5G08050
GO:0006457	P	protein folding	13	570	247	28362	0.0021	0.066	// AT3G01480 // AT3G13310 // AT4G13830 // AT3G15520 // AT1G80920 // AT1G56300 // AT2G28000 // AT2G17880 // AT1G75310 // AT5G49910 // AT3G13470 // AT3G16420 // AT1G55490
GO:0009626	P	plant-type hypersensitive response	7	570	84	28362	0.0022	0.067	// AT3G25070 // AT3G52400 // AT3G50480 // AT4G20380 // AT3G45640 // AT1G64280 // AT2G26560
GO:0071446	P	cellular response to salicylic acid stimulus	6	570	62	28362	0.0022	0.068	// AT3G52400 // AT4G20380 // AT3G56400 // AT5G48485 // AT1G64280 // AT4G14400
GO:0010118	P	stomatal movement	8	570	109	28362	0.0023	0.069	// AT2G05070 // AT3G45780 // AT1G05805 // AT5G22920 // AT1G70410 // AT3G01500 // AT4G33050 // AT5G54270
GO:0034050	P	host programmed cell death induced by symbiont	7	570	85	28362	0.0023	0.069	// AT3G25070 // AT3G52400 // AT3G50480 // AT4G20380 // AT3G45640 // AT1G64280 // AT2G26560
GO:0009639	P	response to red or far red light	12	570	222	28362	0.0025	0.073	// AT2G05070 // AT1G29920 // AT4G10340 // AT2G05100 // AT3G08940 // AT3G54890 // AT1G14280 // AT5G02810 // AT2G16365 // AT5G63310 // AT2G43010 // AT5G24470
GO:0009816	P	defense response to bacterium, incompatible interaction	5	570	43	28362	0.0025	0.073	// AT4G11850 // AT4G23810 // AT4G14400 // AT3G56710 // AT3G25070
GO:0071704	P	organic substance metabolic process	248	570	10672	28362	0.0025	0.074	// AT1G29930 // AT4G05180 // AT5G57660 // AT4G03210 // AT5G16470 // AT1G75690 // AT4G21280 // AT5G02290 // AT3G44890 // AT5G19530 // AT3G58120 // AT2G04842 // AT5G19220 // AT5G08050 // AT2G47220 // AT5G55160 // AT2G43010 // AT4G14342 // AT1G69040 // AT1G05805 // AT1G74270 // AT2G31810 // AT5G44680 // AT4G30220 // AT2G02570 // AT1G21120 // AT5G47190 // AT5G16370 // AT1G48480 // AT4G25890 // AT3G09…
GO:0008219	P	cell death	11	570	194	28362	0.0026	0.076	// AT3G25070 // AT3G57330 // AT3G52400 // AT3G50480 // AT4G20380 // AT4G35350 // AT3G45640 // AT1G64280 // AT4G14400 // AT2G26560 // AT1G55490
GO:0051716	P	cellular response to stimulus	79	570	2856	28362	0.0027	0.077	// AT2G42580 // AT4G19530 // AT5G19770 // AT3G04210 // AT5G54500 // AT5G21170 // AT5G02290 // AT4G14400 // AT3G50950 // AT1G49300 // AT5G44070 // AT4G20380 // AT5G14920 // AT3G45640 // AT3G23050 // AT1G79700 // AT2G26560 // AT2G43010 // AT5G18620 // AT5G25250 // AT1G19770 // AT2G27190 // AT5G61590 // AT1G13260 // AT1G62380 // AT5G66210 // AT5G44680 // AT1G22690 // AT2G38310 // AT3G48360 // AT1G75…
GO:0006790	P	sulfur compound metabolic process	14	570	286	28362	0.0027	0.077	// AT1G16410 // AT2G43910 // AT5G61590 // AT5G44070 // AT1G21100 // AT5G23010 // AT3G09260 // AT2G29630 // AT1G21120 // AT2G44490 // AT3G56400 // AT3G45640 // AT4G10100 // AT4G37260
GO:0044710	P	single-organism metabolic process	104	570	3970	28362	0.0031	0.086	// AT1G13110 // AT1G03400 // AT3G26180 // AT2G04842 // AT5G19220 // AT5G28020 // AT1G69040 // AT5G52100 // AT2G31810 // AT1G20020 // AT1G21120 // AT5G16370 // AT4G13830 // AT5G63310 // AT3G09260 // AT3G49680 // AT1G03090 // AT3G06850 // AT3G18080 // AT4G23890 // AT1G77490 // AT2G17230 // AT2G35500 // AT1G79700 // AT2G29630 // AT3G47800 // AT4G37260 // AT3G57520 // AT5G62980 // AT5G64040 // AT5G44…
GO:0051188	P	cofactor biosynthetic process	12	570	229	28362	0.0032	0.088	// AT4G25080 // AT3G14930 // AT5G62980 // AT3G03710 // AT3G56940 // AT4G27440 // AT2G29630 // AT1G74470 // AT3G21200 // AT3G48730 // AT4G10100 // AT5G13630
GO:0016053	P	organic acid biosynthetic process	21	570	531	28362	0.0034	0.094	// AT1G16410 // AT1G75500 // AT3G06850 // AT2G37500 // AT2G19800 // AT5G52100 // AT5G21170 // AT2G35500 // AT2G31810 // AT5G28840 // AT3G30775 // AT3G49680 // AT1G79700 // AT2G15090 // AT3G19480 // AT5G62980 // AT5G37600 // AT1G76680 // AT2G26560 // AT3G58610 // AT5G28020
GO:0012501	P	programmed cell death	9	570	147	28362	0.0039	0.11	// AT3G25070 // AT3G57330 // AT3G52400 // AT3G50480 // AT4G20380 // AT4G35350 // AT3G45640 // AT1G64280 // AT2G26560
GO:0010410	P	hemicellulose metabolic process	7	570	96	28362	0.0043	0.12	// AT4G03210 // AT5G65730 // AT2G15390 // AT4G30270 // AT1G32170 // AT5G64570 // AT5G57560
GO:0007154	P	cell communication	63	570	2223	28362	0.0044	0.12	// AT2G42580 // AT4G19530 // AT3G04210 // AT5G21170 // AT5G02290 // AT3G50950 // AT4G27300 // AT1G49300 // AT4G20380 // AT3G45640 // AT3G23050 // AT1G79700 // AT2G43010 // AT1G19770 // AT2G27190 // AT5G61590 // AT5G66210 // AT5G38480 // AT1G22690 // AT2G38310 // AT3G48360 // AT1G75500 // AT1G33600 // AT4G35310 // AT1G52290 // AT5G63310 // AT3G04730 // AT4G04695 // AT4G16860 // AT3G45780 // AT4G38…
GO:0044283	P	small molecule biosynthetic process	24	570	653	28362	0.0045	0.12	// AT2G19800 // AT5G21170 // AT5G62980 // AT2G26560 // AT3G58610 // AT5G28020 // AT5G52100 // AT2G31810 // AT3G19480 // AT4G26530 // AT1G76680 // AT1G16410 // AT1G75500 // AT3G30775 // AT3G49680 // AT5G28840 // AT2G37500 // AT3G06850 // AT2G35500 // AT1G79700 // AT2G29630 // AT2G15090 // AT1G74470 // AT5G37600
GO:0042440	P	pigment metabolic process	10	570	181	28362	0.0048	0.13	// AT4G25080 // AT3G14930 // AT1G75040 // AT3G21200 // AT3G03710 // AT3G56940 // AT4G27440 // AT1G74470 // AT3G48730 // AT5G13630
GO:0009723	P	response to ethylene	14	570	307	28362	0.0049	0.13	// AT5G61590 // AT4G17490 // AT1G62380 // AT5G38480 // AT4G27440 // AT3G50480 // AT1G79700 // AT3G15356 // AT5G51190 // AT4G20380 // AT4G06746 // AT3G04720 // AT1G13260 // AT4G37260
GO:0019760	P	glucosinolate metabolic process	7	570	99	28362	0.0051	0.13	// AT1G16410 // AT2G43910 // AT5G61590 // AT5G23010 // AT2G44490 // AT3G09260 // AT4G37260
GO:0019757	P	glycosinolate metabolic process	7	570	99	28362	0.0051	0.13	// AT1G16410 // AT2G43910 // AT5G61590 // AT5G23010 // AT2G44490 // AT3G09260 // AT4G37260
GO:0044711	P	single-organism biosynthetic process	51	570	1735	28362	0.0052	0.13	// AT1G13110 // AT2G19800 // AT5G21170 // ATCG00480 // AT5G23010 // AT5G63310 // AT3G26180 // AT2G15390 // AT5G19220 // AT3G45640 // AT5G62980 // AT4G13830 // AT3G55010 // AT2G26560 // AT3G58610 // AT5G28020 // AT5G52100 // AT1G75040 // AT2G31810 // AT3G19480 // AT4G26530 // AT2G36390 // AT1G76680 // AT3G48730 // AT5G13630 // AT1G16410 // AT4G25080 // AT3G14930 // AT1G75500 // AT3G30775 // AT3G49…
GO:0046686	P	response to cadmium ion	15	570	343	28362	0.0053	0.13	// AT2G39920 // AT2G33800 // AT3G14930 // AT1G75040 // AT5G07440 // AT4G37260 // AT5G44070 // AT5G11670 // AT5G19780 // AT5G23120 // AT5G18170 // AT1G76680 // AT2G26560 // AT3G58610 // AT5G49910
GO:0010038	P	response to metal ion	19	570	481	28362	0.0053	0.13	// AT2G39920 // AT2G33800 // AT3G14930 // AT4G11850 // AT5G07440 // AT4G37260 // AT4G39260 // AT1G62380 // AT5G44070 // AT5G19140 // AT1G75040 // AT5G11670 // AT5G19780 // AT5G23120 // AT5G18170 // AT1G76680 // AT2G26560 // AT3G58610 // AT5G49910
GO:0071840	P	cellular component organization or biogenesis	76	570	2812	28362	0.0057	0.14	// AT4G20780 // AT1G64510 // AT4G03210 // AT1G35680 // AT3G48740 // AT1G32170 // AT5G19530 // AT3G45780 // AT3G44750 // AT2G46600 // AT5G67560 // AT1G13210 // AT3G48870 // AT5G08050 // AT2G28000 // AT5G57560 // AT5G61210 // AT5G18620 // AT5G40450 // AT5G25250 // AT4G27230 // AT1G32990 // AT2G16365 // AT5G39210 // AT5G44070 // AT2G18710 // AT3G62910 // AT4G38160 // AT4G30220 // AT3G63190 // AT3G02…
GO:0044700	P	single organism signaling	57	570	1995	28362	0.0056	0.14	// AT2G42580 // AT4G19530 // AT3G04210 // AT5G02290 // AT3G50950 // AT1G49300 // AT4G20380 // AT3G45640 // AT3G23050 // AT2G43010 // AT1G19770 // AT4G14400 // AT5G61590 // AT5G66210 // AT1G22690 // AT2G38310 // AT3G48360 // AT4G10100 // AT1G75500 // AT1G33600 // AT4G35310 // AT1G52290 // AT5G63310 // AT3G04730 // AT4G04695 // AT4G16860 // AT3G45780 // AT4G16950 // AT4G16990 // AT5G48485 // AT5G01…
GO:0080167	P	response to karrikin	8	570	128	28362	0.0056	0.14	// AT3G57520 // AT2G16365 // AT5G51550 // AT3G13790 // AT5G20250 // AT3G47470 // AT5G08050 // AT4G27280
GO:0023052	P	signaling	57	570	1997	28362	0.0058	0.14	// AT2G42580 // AT4G19530 // AT3G04210 // AT5G02290 // AT3G50950 // AT1G49300 // AT4G20380 // AT3G45640 // AT3G23050 // AT2G43010 // AT1G19770 // AT4G14400 // AT5G61590 // AT5G66210 // AT1G22690 // AT2G38310 // AT3G48360 // AT4G10100 // AT1G75500 // AT1G33600 // AT4G35310 // AT1G52290 // AT5G63310 // AT3G04730 // AT4G04695 // AT4G16860 // AT3G45780 // AT4G16950 // AT4G16990 // AT5G48485 // AT5G01…
GO:0009611	P	response to wounding	11	570	217	28362	0.0058	0.14	// AT4G24350 // AT4G35770 // AT1G51400 // AT3G13790 // AT3G15356 // AT3G48360 // AT3G45640 // AT1G64280 // AT3G23050 // AT1G76680 // AT3G14840
GO:0044085	P	cellular component biogenesis	35	570	1095	28362	0.006	0.14	// AT1G64510 // AT4G03210 // AT1G32170 // AT3G44890 // AT3G48870 // AT5G08050 // AT1G32990 // AT5G57560 // AT4G30270 // AT4G38160 // AT4G30220 // AT5G47190 // AT2G15390 // AT5G23120 // AT1G74270 // AT3G63490 // AT3G56910 // AT3G01480 // AT3G01316 // AT3G63140 // AT5G65730 // AT5G65220 // AT5G18620 // AT1G75500 // AT2G33800 // AT3G46320 // AT3G48740 // AT1G48350 // AT3G03710 // AT5G39210 // AT4G25…
GO:0080135	P	regulation of cellular response to stress	5	570	54	28362	0.0061	0.14	// AT3G52400 // AT3G10040 // AT5G18620 // AT3G25070 // AT3G45640
GO:1901701	P	cellular response to oxygen-containing compound	23	570	635	28362	0.0062	0.14	// AT2G42580 // AT4G20380 // AT3G45640 // AT1G22690 // AT1G62380 // AT2G38310 // AT3G48360 // AT4G35310 // AT4G14400 // AT4G04695 // AT5G16470 // AT5G48485 // AT5G01810 // AT2G18300 // AT3G15356 // AT3G56400 // AT5G66210 // AT2G05070 // AT3G52400 // AT1G12580 // AT4G30270 // AT1G64280 // AT5G14920
GO:0080134	P	regulation of response to stress	14	570	316	28362	0.0062	0.14	// AT4G23810 // AT3G10040 // AT3G25070 // AT3G52400 // AT4G16990 // AT5G18620 // AT3G07780 // AT4G19530 // AT3G56400 // AT3G45640 // AT1G64280 // AT4G14400 // AT3G09260 // AT3G14840
GO:0007165	P	signal transduction	56	570	1965	28362	0.0064	0.15	// AT2G42580 // AT4G19530 // AT3G04210 // AT5G02290 // AT3G50950 // AT1G49300 // AT4G20380 // AT3G45640 // AT3G23050 // AT2G43010 // AT1G19770 // AT4G14400 // AT5G61590 // AT5G66210 // AT1G22690 // AT2G38310 // AT3G48360 // AT4G10100 // AT1G75500 // AT1G33600 // AT4G35310 // AT1G52290 // AT5G63310 // AT3G04730 // AT4G04695 // AT4G16860 // AT3G45780 // AT4G16950 // AT4G16990 // AT5G48485 // AT5G01…
GO:0009743	P	response to carbohydrate	8	570	133	28362	0.007	0.16	// AT1G28330 // AT1G29920 // AT3G06850 // AT4G35770 // AT5G21170 // AT5G20250 // AT3G48360 // AT1G66180
GO:0000160	P	phosphorelay signal transduction system	11	570	225	28362	0.0075	0.17	// AT3G45780 // AT5G61590 // AT4G17490 // AT1G79700 // AT3G15356 // AT5G51190 // AT4G20380 // AT4G06746 // AT5G38480 // AT1G13260 // AT5G02810
GO:0009606	P	tropism	6	570	81	28362	0.0075	0.17	// AT3G45780 // AT2G41100 // AT1G14280 // AT4G16515 // AT3G23050 // AT3G15540
GO:0055114	P	oxidation-reduction process	46	570	1566	28362	0.0079	0.18	// AT1G13110 // AT5G23250 // AT5G54500 // AT5G07440 // AT5G64040 // AT1G03400 // AT2G29290 // AT5G19220 // AT5G18170 // AT5G43440 // AT3G58610 // AT2G19800 // AT1G71695 // AT5G52100 // AT1G62380 // AT1G20020 // AT4G22010 // AT3G19480 // AT2G29310 // ATCG00430 // AT2G36390 // AT1G76680 // AT1G17650 // AT1G16410 // AT4G33520 // AT2G37130 // AT2G14170 // AT5G61440 // AT3G30775 // AT2G25080 // AT5G11…
GO:0044267	P	cellular protein metabolic process	98	570	3841	28362	0.0084	0.19	// AT1G29930 // AT4G05180 // AT1G75690 // AT4G21280 // AT5G02290 // AT3G44890 // AT2G04842 // AT1G74270 // AT5G47190 // AT1G48480 // AT4G25890 // AT4G04695 // AT3G56910 // AT1G29920 // AT5G01810 // AT2G02360 // AT3G25070 // AT4G01330 // AT1G12580 // AT1G16720 // AT4G30690 // AT3G10610 // AT1G29910 // AT4G04570 // AT2G43030 // AT3G56020 // AT5G23210 // AT3G19850 // AT5G14660 // AT3G63190 // AT4G35…
GO:0072593	P	reactive oxygen species metabolic process	9	570	169	28362	0.009	0.2	// AT1G77490 // AT2G05070 // AT5G14920 // AT2G37130 // AT1G71695 // AT5G51720 // AT4G20380 // AT4G09010 // AT4G36730
GO:0046394	P	carboxylic acid biosynthetic process	17	570	438	28362	0.0094	0.21	// AT1G16410 // AT3G06850 // AT2G37500 // AT2G19800 // AT5G52100 // AT5G21170 // AT2G31810 // AT5G28840 // AT3G30775 // AT3G49680 // AT1G79700 // AT2G15090 // AT3G19480 // AT5G37600 // AT1G76680 // AT2G26560 // AT3G58610
GO:0031347	P	regulation of defense response	11	570	233	28362	0.0095	0.21	// AT4G23810 // AT4G19530 // AT3G25070 // AT3G52400 // AT4G16990 // AT3G07780 // AT3G56400 // AT1G64280 // AT4G14400 // AT3G09260 // AT3G14840
GO:0010565	P	regulation of cellular ketone metabolic process	5	570	61	28362	0.0097	0.21	// AT4G13830 // AT1G69040 // AT3G03710 // AT4G20380 // AT1G79700
GO:0010260	P	organ senescence	7	570	114	28362	0.01	0.22	// AT4G23810 // AT1G64360 // AT4G01250 // AT5G51720 // AT3G56400 // AT5G37600 // AT1G76680
GO:0010150	P	leaf senescence	7	570	114	28362	0.01	0.22	// AT4G23810 // AT1G64360 // AT4G01250 // AT5G51720 // AT3G56400 // AT5G37600 // AT1G76680
GO:0009744	P	response to sucrose	5	570	62	28362	0.01	0.22	// AT1G28330 // AT5G21170 // AT3G06850 // AT4G35770 // AT5G20250
GO:0071365	P	cellular response to auxin stimulus	10	570	206	28362	0.011	0.23	// AT2G42580 // AT5G54500 // AT1G75500 // AT3G15540 // AT4G10100 // AT3G48360 // AT3G23050 // AT5G63310 // AT3G04730 // AT2G43010
GO:0016043	P	cellular component organization	66	570	2456	28362	0.011	0.23	// AT4G20780 // AT4G03210 // AT1G35680 // AT5G23420 // AT5G19530 // AT3G45780 // AT3G44750 // AT2G46600 // AT5G67560 // AT1G13210 // AT5G08050 // AT2G28000 // AT1G32990 // AT5G61210 // AT5G40450 // AT5G25250 // AT4G27230 // AT5G57560 // AT2G16365 // AT5G39210 // AT5G44070 // AT2G18710 // AT3G62910 // AT4G38160 // AT4G30220 // AT3G63190 // AT3G02170 // AT1G55490 // AT1G32170 // AT4G38550 // AT1G67…
GO:0042254	P	ribosome biogenesis	14	570	341	28362	0.011	0.24	// AT1G64510 // AT3G01316 // AT3G63140 // AT5G65220 // AT3G03710 // AT4G38160 // AT3G44890 // AT5G47190 // AT2G33800 // AT3G27160 // AT1G32990 // AT1G74270 // AT1G48350 // AT3G63490
GO:0006807	P	nitrogen compound metabolic process	149	570	6241	28362	0.012	0.24	// AT5G57660 // AT4G14342 // AT3G44890 // AT5G19530 // AT3G58120 // AT2G04842 // AT5G08050 // AT2G47220 // AT2G43010 // AT1G69040 // AT1G05805 // AT2G31810 // AT4G30220 // AT2G02570 // AT1G21120 // AT5G47190 // AT4G25890 // AT3G09260 // AT3G56910 // AT4G23810 // AT2G18328 // AT3G54560 // AT3G49680 // AT1G03090 // AT5G08330 // AT2G34620 // AT3G10040 // AT4G36570 // AT3G04730 // AT2G35500 // AT3G15…
GO:0048511	P	rhythmic process	8	570	146	28362	0.012	0.24	// AT2G37130 // AT3G45780 // AT3G46780 // AT2G16365 // AT3G48360 // AT5G08330 // AT5G02810 // AT5G24470
GO:0010383	P	cell wall polysaccharide metabolic process	7	570	118	28362	0.012	0.24	// AT4G03210 // AT5G65730 // AT2G15390 // AT4G30270 // AT1G32170 // AT5G64570 // AT5G57560
GO:1901605	P	alpha-amino acid metabolic process	11	570	242	28362	0.012	0.24	// AT5G52100 // AT5G28020 // AT2G31810 // AT3G30775 // AT3G49680 // AT3G19480 // AT1G75500 // AT5G37600 // AT1G32470 // AT2G37500 // AT3G58610
GO:0034285	P	response to disaccharide	5	570	65	28362	0.012	0.25	// AT1G28330 // AT5G21170 // AT3G06850 // AT4G35770 // AT5G20250
GO:0048583	P	regulation of response to stimulus	20	570	565	28362	0.013	0.25	// AT1G19770 // AT3G10040 // AT2G16365 // AT3G25070 // AT4G23810 // AT3G52400 // AT5G01810 // AT5G18620 // AT3G09260 // AT3G07780 // AT1G75500 // AT4G19530 // AT4G16990 // AT3G56400 // AT3G45640 // AT1G64280 // AT4G20380 // AT4G14400 // AT2G43010 // AT3G14840
GO:0061024	P	membrane organization	10	570	212	28362	0.013	0.26	// AT5G25250 // AT2G30170 // AT1G35680 // AT3G52400 // AT2G18710 // AT3G62910 // AT5G54720 // AT1G13210 // AT5G61210 // AT5G08050
GO:0051186	P	cofactor metabolic process	15	570	389	28362	0.015	0.29	// AT4G25080 // AT3G14930 // AT5G57655 // AT4G26530 // AT3G03710 // AT3G56940 // AT4G27440 // AT2G29630 // AT3G21200 // AT5G11670 // AT1G74470 // AT5G62980 // AT3G48730 // AT4G10100 // AT5G13630
GO:0009741	P	response to brassinosteroid	6	570	95	28362	0.015	0.29	// AT2G42580 // AT2G18300 // AT4G08950 // AT4G30270 // AT5G57560 // AT1G13260
GO:0009873	P	ethylene-activated signaling pathway	9	570	185	28362	0.015	0.29	// AT5G61590 // AT4G17490 // AT1G79700 // AT3G15356 // AT4G20380 // AT5G51190 // AT4G06746 // AT5G38480 // AT1G13260
GO:0045088	P	regulation of innate immune response	6	570	96	28362	0.016	0.3	// AT4G19530 // AT3G25070 // AT3G52400 // AT3G56400 // AT1G64280 // AT3G14840
GO:0033993	P	response to lipid	25	570	772	28362	0.016	0.3	// AT2G42580 // AT3G45640 // AT1G08930 // AT5G57560 // AT1G22690 // AT1G62380 // AT2G38310 // AT3G48360 // AT4G35310 // AT2G16850 // AT4G04695 // AT5G01810 // AT2G18300 // AT5G66210 // AT2G05070 // AT1G12580 // AT4G39260 // AT4G08950 // AT4G30270 // AT5G61210 // AT3G22060 // AT1G13260 // AT5G14920 // AT5G54270 // AT4G37260
GO:0035556	P	intracellular signal transduction	22	570	660	28362	0.017	0.33	// AT1G49300 // AT4G20380 // AT3G45640 // AT5G61590 // AT5G02810 // AT4G35310 // AT5G38480 // AT4G04695 // AT3G45780 // AT5G01810 // AT3G15356 // AT5G51190 // AT5G57630 // AT5G67560 // AT4G06746 // AT5G66210 // AT4G17490 // AT1G12580 // AT3G05490 // AT1G79700 // AT4G38470 // AT1G13260
GO:0009734	P	auxin-activated signaling pathway	9	570	190	28362	0.018	0.33	// AT2G42580 // AT1G75500 // AT3G15540 // AT4G10100 // AT3G48360 // AT3G23050 // AT5G63310 // AT3G04730 // AT2G43010
GO:0051606	P	detection of stimulus	6	570	99	28362	0.018	0.33	// AT1G62380 // AT3G54560 // AT1G14280 // AT2G29630 // AT5G63310 // AT2G43010
GO:0022613	P	ribonucleoprotein complex biogenesis	15	570	399	28362	0.018	0.34	// AT1G64510 // AT3G01316 // AT3G63140 // AT5G65220 // AT3G03710 // AT4G38160 // AT4G30220 // AT3G44890 // AT5G47190 // AT2G33800 // AT3G27160 // AT1G32990 // AT1G74270 // AT1G48350 // AT3G63490
GO:0071482	P	cellular response to light stimulus	7	570	130	28362	0.019	0.35	// AT3G45780 // AT3G56710 // AT1G14280 // AT2G43010 // AT2G30170 // AT5G63310 // AT5G02810
GO:0050776	P	regulation of immune response	6	570	101	28362	0.019	0.35	// AT4G19530 // AT3G25070 // AT3G52400 // AT3G56400 // AT1G64280 // AT3G14840
GO:0044271	P	cellular nitrogen compound biosynthetic process	108	570	4436	28362	0.02	0.36	// AT5G57660 // AT3G44890 // AT5G19530 // AT5G52520 // AT2G04842 // AT5G08050 // AT3G23050 // AT2G43010 // AT1G05805 // AT5G47190 // AT5G63310 // AT3G56910 // AT4G23810 // AT2G18328 // AT3G54560 // AT5G08330 // AT2G34620 // AT3G10040 // AT4G36570 // AT3G04730 // AT3G15540 // AT1G79700 // AT2G29630 // AT1G16720 // AT4G30690 // AT3G56710 // AT4G37260 // AT3G10610 // AT5G62980 // AT5G44070 // AT2G43…
GO:0044238	P	primary metabolic process	223	570	9890	28362	0.02	0.36	// AT1G29930 // AT4G05180 // AT5G57660 // AT4G03210 // AT1G75690 // AT4G21280 // AT5G02290 // AT3G44890 // AT3G58120 // AT2G04842 // AT5G19220 // AT5G08050 // AT2G47220 // AT5G55160 // AT2G43010 // AT4G14342 // AT1G69040 // AT1G05805 // AT2G31810 // AT5G44680 // AT4G30220 // AT2G02570 // AT5G47190 // AT5G16370 // AT1G48480 // AT4G25890 // AT3G09260 // AT3G56910 // AT4G23810 // AT1G29920 // AT5G47…
GO:0008652	P	cellular amino acid biosynthetic process	7	570	132	28362	0.02	0.37	// AT5G52100 // AT2G31810 // AT3G49680 // AT3G19480 // AT5G37600 // AT2G37500 // AT3G58610
GO:0009733	P	response to auxin	15	570	407	28362	0.021	0.38	// AT2G42580 // AT5G63310 // AT5G54500 // AT1G75500 // AT5G19140 // AT3G15540 // AT4G10100 // AT4G34750 // AT4G37610 // AT3G48360 // AT3G23050 // AT5G57560 // AT3G04730 // AT2G43010 // AT3G12955
GO:0018105	P	peptidyl-serine phosphorylation	5	570	76	28362	0.022	0.38	// AT4G35310 // AT1G12580 // AT5G01810 // AT4G04695 // AT5G66210
GO:0071396	P	cellular response to lipid	15	570	409	28362	0.022	0.38	// AT2G42580 // AT2G05070 // AT5G66210 // AT1G62380 // AT1G12580 // AT5G01810 // AT2G18300 // AT1G22690 // AT2G38310 // AT4G30270 // AT3G48360 // AT5G14920 // AT3G45640 // AT4G35310 // AT4G04695
GO:0007623	P	circadian rhythm	7	570	134	28362	0.022	0.38	// AT3G45780 // AT3G46780 // AT2G16365 // AT3G48360 // AT5G08330 // AT5G02810 // AT5G24470
GO:0042743	P	hydrogen peroxide metabolic process	6	570	104	28362	0.022	0.38	// AT1G77490 // AT2G37130 // AT1G71695 // AT4G20380 // AT4G09010 // AT4G36730
GO:0071478	P	cellular response to radiation	7	570	135	28362	0.023	0.39	// AT3G45780 // AT3G56710 // AT1G14280 // AT2G43010 // AT2G30170 // AT5G63310 // AT5G02810
GO:0071822	P	protein complex subunit organization	13	570	338	28362	0.023	0.39	// AT3G01480 // AT3G48870 // AT4G25940 // AT3G48740 // AT3G62910 // AT5G18620 // AT3G63190 // AT5G39210 // AT5G11670 // AT5G23120 // AT3G46320 // AT4G10340 // AT1G16720
GO:0018209	P	peptidyl-serine modification	5	570	78	28362	0.024	0.41	// AT4G35310 // AT1G12580 // AT5G01810 // AT4G04695 // AT5G66210
GO:0044249	P	cellular biosynthetic process	138	570	5870	28362	0.024	0.41	// AT5G57660 // AT3G44890 // AT5G19530 // AT5G52520 // AT2G04842 // AT5G19220 // AT5G08050 // AT3G23050 // AT2G43010 // AT5G28020 // AT1G05805 // AT2G31810 // AT1G21120 // AT5G47190 // AT4G25890 // AT3G56910 // AT4G23810 // AT2G18328 // AT3G54560 // AT3G49680 // AT3G06850 // AT5G08330 // AT2G34620 // AT3G10040 // AT4G36570 // AT3G04730 // AT2G35500 // AT3G15540 // AT1G79700 // AT2G29630 // AT1G16…
GO:1901135	P	carbohydrate derivative metabolic process	21	570	645	28362	0.025	0.41	// AT1G21100 // AT3G55010 // AT4G13830 // AT5G57655 // AT4G26530 // ATCG00480 // AT3G03710 // AT3G18080 // AT5G28840 // AT3G09260 // AT5G44070 // AT1G21120 // AT4G24350 // AT2G44490 // AT3G56400 // AT3G53900 // AT2G36390 // AT5G63310 // AT2G15390 // AT5G40610 // AT5G11670
GO:0071214	P	cellular response to abiotic stimulus	9	570	202	28362	0.025	0.41	// AT3G45780 // AT5G19770 // AT3G56710 // AT1G14280 // AT2G43010 // AT2G30170 // AT5G57630 // AT5G63310 // AT5G02810
GO:0071369	P	cellular response to ethylene stimulus	9	570	206	28362	0.027	0.46	// AT5G61590 // AT4G17490 // AT1G79700 // AT3G15356 // AT4G20380 // AT5G51190 // AT4G06746 // AT5G38480 // AT1G13260
GO:0005975	P	carbohydrate metabolic process	33	570	1144	28362	0.028	0.46	// AT3G57520 // AT4G03210 // AT4G26530 // AT3G13750 // AT5G19220 // AT5G64570 // AT5G57560 // AT2G19800 // AT5G66530 // AT5G49360 // AT5G47500 // AT5G21170 // AT2G36390 // AT3G09260 // AT3G10720 // AT4G13830 // AT5G65730 // AT5G57655 // AT3G52840 // AT5G20250 // AT3G18080 // AT1G70820 // AT2G26440 // AT3G03710 // AT1G32170 // AT3G13790 // AT4G30270 // AT1G21270 // AT3G47800 // AT2G44490 // AT4G23…
GO:0002682	P	regulation of immune system process	6	570	111	28362	0.029	0.47	// AT4G19530 // AT3G25070 // AT3G52400 // AT3G56400 // AT1G64280 // AT3G14840
GO:0009110	P	vitamin biosynthetic process	5	570	82	28362	0.029	0.47	// AT2G29630 // AT5G28840 // AT2G19800 // AT1G74470 // AT5G62980
GO:0043603	P	cellular amide metabolic process	43	570	1575	28362	0.029	0.48	// AT1G64510 // AT3G10610 // ATCG00830 // ATCG00660 // AT5G62980 // AT5G08650 // AT5G44070 // AT2G43030 // AT2G04842 // AT3G56020 // AT1G32990 // ATCG01020 // AT1G35680 // AT3G62910 // AT5G14660 // AT3G63190 // AT5G47190 // ATCG01310 // AT1G18440 // AT4G25890 // AT1G74270 // AT5G46160 // AT3G63490 // AT3G56910 // AT1G48350 // AT3G63140 // AT5G65220 // ATCG00800 // AT3G44890 // AT1G67700 // AT3G27…
GO:0043604	P	amide biosynthetic process	42	570	1536	28362	0.03	0.49	// AT1G64510 // AT3G10610 // ATCG00830 // ATCG00660 // AT5G62980 // AT5G08650 // AT5G44070 // AT2G43030 // AT2G04842 // AT3G56020 // AT1G32990 // ATCG01020 // AT1G35680 // AT3G62910 // AT5G14660 // AT3G63190 // AT5G47190 // ATCG01310 // AT1G18440 // AT4G25890 // AT1G74270 // AT5G46160 // AT3G63490 // AT3G56910 // AT1G48350 // AT3G63140 // AT5G65220 // ATCG00800 // AT3G44890 // AT3G27850 // AT5G52…
GO:0006518	P	peptide metabolic process	42	570	1540	28362	0.031	0.51	// AT1G64510 // AT3G10610 // ATCG00830 // ATCG00660 // AT3G44890 // AT5G44070 // AT2G43030 // AT2G04842 // AT3G56020 // AT1G32990 // ATCG01020 // AT1G35680 // AT3G62910 // AT5G14660 // AT3G63190 // AT5G47190 // ATCG01310 // AT1G18440 // AT4G25890 // AT1G74270 // AT5G46160 // AT3G63490 // AT3G56910 // AT1G48350 // AT3G63140 // AT5G65220 // ATCG00800 // AT5G08650 // AT1G67700 // AT3G27850 // AT5G52…
GO:0006766	P	vitamin metabolic process	5	570	84	28362	0.031	0.51	// AT2G29630 // AT5G28840 // AT2G19800 // AT1G74470 // AT5G62980
GO:0009058	P	biosynthetic process	145	570	6255	28362	0.032	0.51	// AT1G13110 // AT5G57660 // AT3G44890 // AT5G19530 // AT3G58120 // AT3G26180 // AT2G04842 // AT5G19220 // AT5G08050 // AT3G23050 // AT2G43010 // AT5G28020 // AT1G05805 // AT2G31810 // AT1G21120 // AT5G47190 // AT4G25890 // AT3G56910 // AT4G23810 // AT2G18328 // AT3G54560 // AT3G49680 // AT2G42040 // AT5G08330 // AT2G34620 // AT3G10040 // AT4G36570 // AT1G74270 // AT2G35500 // AT3G15540 // AT1G79…
GO:0019538	P	protein metabolic process	103	570	4289	28362	0.032	0.51	// AT1G29930 // AT4G05180 // AT1G75690 // AT4G21280 // AT5G02290 // AT3G44890 // AT2G04842 // AT5G47190 // AT1G48480 // AT4G25890 // AT4G04695 // AT3G56910 // AT1G29920 // AT1G66180 // AT5G01810 // AT2G02360 // AT3G25070 // AT1G74270 // AT1G12580 // AT1G16720 // AT4G30690 // AT3G10610 // AT1G29910 // AT4G04570 // AT2G43030 // AT3G56020 // AT5G23210 // AT3G19850 // AT5G14660 // AT3G63190 // AT4G35…
GO:0043043	P	peptide biosynthetic process	41	570	1514	28362	0.036	0.58	// AT1G64510 // AT3G10610 // ATCG00830 // ATCG00660 // AT3G44890 // AT5G44070 // AT2G43030 // AT2G04842 // AT3G56020 // AT1G32990 // ATCG01020 // AT1G35680 // AT3G62910 // AT5G14660 // AT3G63190 // AT5G47190 // ATCG01310 // AT1G18440 // AT4G25890 // AT1G74270 // AT5G46160 // AT3G63490 // AT3G56910 // AT1G48350 // AT3G63140 // AT5G65220 // ATCG00800 // AT5G08650 // AT3G27850 // AT5G52520 // AT1G05…
GO:1901657	P	glycosyl compound metabolic process	12	570	326	28362	0.037	0.58	// AT1G21100 // AT4G26530 // ATCG00480 // AT3G18080 // AT5G44070 // AT1G21120 // AT4G24350 // AT2G44490 // AT3G56400 // AT3G53900 // AT5G63310 // AT3G09260
GO:0044802	P	single-organism membrane organization	7	570	153	28362	0.04	0.62	// AT2G30170 // AT1G35680 // AT3G52400 // AT2G18710 // AT3G62910 // AT5G54720 // AT5G08050
GO:0071407	P	cellular response to organic cyclic compound	8	570	187	28362	0.04	0.63	// AT2G42580 // AT3G52400 // AT2G18300 // AT4G20380 // AT3G56400 // AT5G48485 // AT1G64280 // AT4G14400
GO:0070271	P	protein complex biogenesis	11	570	294	28362	0.04	0.63	// AT3G01480 // AT3G48870 // AT4G25940 // AT3G48740 // AT5G39210 // AT5G11670 // AT5G23120 // AT3G46320 // AT4G10340 // AT1G16720 // AT3G56910
GO:0009753	P	response to jasmonic acid	9	570	225	28362	0.043	0.66	// AT4G35770 // AT3G52400 // AT3G50480 // AT3G15356 // AT3G48360 // AT3G56400 // AT1G64280 // AT3G23050 // AT4G37260
GO:0031667	P	response to nutrient levels	8	570	190	28362	0.043	0.66	// AT2G27190 // AT3G06850 // AT1G66180 // AT5G21170 // AT3G03710 // AT2G29630 // AT3G53900 // AT5G38480
GO:0044036	P	cell wall macromolecule metabolic process	7	570	158	28362	0.046	0.7	// AT4G03210 // AT5G65730 // AT2G15390 // AT4G30270 // AT1G32170 // AT5G64570 // AT5G57560
GO:0006412	P	translation	40	570	1500	28362	0.046	0.7	// AT1G64510 // AT3G10610 // ATCG00830 // ATCG00660 // AT3G44890 // AT2G43030 // AT2G04842 // AT3G56020 // AT1G32990 // ATCG01020 // AT1G35680 // AT3G62910 // AT5G14660 // AT3G63190 // AT5G47190 // ATCG01310 // AT1G18440 // AT4G25890 // AT1G74270 // AT5G46160 // AT3G63490 // AT3G56910 // AT1G48350 // AT3G63140 // AT5G65220 // ATCG00800 // AT5G08650 // AT3G27850 // AT5G52520 // AT1G05190 // AT3G43…
GO:0033554	P	cellular response to stress	25	570	858	28362	0.046	0.7	// AT5G18620 // AT5G44070 // AT4G20380 // AT3G45640 // AT2G26560 // AT5G25250 // AT2G27190 // AT1G62380 // AT5G38480 // AT3G09260 // AT5G16470 // AT3G50480 // AT3G06850 // AT5G57630 // AT1G77490 // AT3G10040 // AT3G25070 // AT3G52400 // AT5G44680 // AT3G03710 // AT2G44490 // AT4G09010 // AT3G53900 // AT1G64280 // AT5G06690
GO:1901576	P	organic substance biosynthetic process	136	570	5913	28362	0.046	0.7	// AT5G57660 // AT3G44890 // AT5G19530 // AT5G52520 // AT2G04842 // AT5G19220 // AT5G08050 // AT3G23050 // AT2G43010 // AT5G28020 // AT1G05805 // AT2G31810 // AT5G47190 // AT5G63310 // AT3G56910 // AT4G23810 // AT2G18328 // AT3G54560 // AT3G49680 // AT3G06850 // AT4G31550 // AT5G08330 // AT2G34620 // AT3G10040 // AT4G36570 // AT1G74270 // AT2G35500 // AT3G15540 // AT1G79700 // AT2G29630 // AT1G16…
GO:0006464	P	cellular protein modification process	54	570	2126	28362	0.049	0.73	// AT1G29930 // AT4G05180 // AT1G29910 // AT5G21170 // AT4G21280 // AT5G02290 // AT1G29920 // AT4G04570 // AT1G53440 // AT4G37610 // AT3G45640 // AT2G05100 // AT2G34420 // AT3G14840 // AT3G19850 // AT5G14660 // AT5G66210 // AT3G48360 // AT2G15390 // AT1G48480 // AT4G35310 // AT1G52290 // AT4G23180 // AT4G01330 // AT4G04695 // AT3G01480 // AT3G45780 // AT2G05070 // AT3G54890 // AT1G15820 // AT1G51…
GO:0036211	P	protein modification process	54	570	2126	28362	0.049	0.73	// AT1G29930 // AT4G05180 // AT1G29910 // AT5G21170 // AT4G21280 // AT5G02290 // AT1G29920 // AT4G04570 // AT1G53440 // AT4G37610 // AT3G45640 // AT2G05100 // AT2G34420 // AT3G14840 // AT3G19850 // AT5G14660 // AT5G66210 // AT3G48360 // AT2G15390 // AT1G48480 // AT4G35310 // AT1G52290 // AT4G23180 // AT4G01330 // AT4G04695 // AT3G01480 // AT3G45780 // AT2G05070 // AT3G54890 // AT1G15820 // AT1G51…
GO:0023051	P	regulation of signaling	9	570	231	28362	0.049	0.73	// AT1G75500 // AT5G01810 // AT1G19770 // AT4G20380 // AT2G30424 // AT3G45640 // AT1G64280 // AT4G14400 // AT2G43010
GO:0006996	P	organelle organization	36	570	1335	28362	0.05	0.74	// AT1G35680 // AT5G23420 // AT5G18620 // AT3G44750 // AT4G38160 // AT5G67560 // AT5G08050 // AT2G28000 // AT1G32990 // AT5G40450 // AT2G16365 // AT2G18710 // AT3G62910 // AT4G27230 // AT3G63190 // AT1G55490 // AT4G38550 // AT5G55280 // AT3G09260 // AT3G56910 // AT3G45780 // AT3G48870 // AT3G63140 // AT1G13210 // AT3G54560 // AT1G20693 // AT5G23120 // AT2G33800 // AT4G33050 // AT3G46320 // AT2G30…
GO:0034599	P	cellular response to oxidative stress	5	570	97	28362	0.051	0.75	// AT1G77490 // AT5G16470 // AT5G06690 // AT4G09010 // AT1G62380
GO:0010646	P	regulation of cell communication	9	570	234	28362	0.053	0.77	// AT1G75500 // AT5G01810 // AT1G19770 // AT4G20380 // AT2G30424 // AT3G45640 // AT1G64280 // AT4G14400 // AT2G43010
GO:0065003	P	macromolecular complex assembly	14	570	424	28362	0.053	0.78	// AT3G01480 // AT4G10340 // AT4G25940 // AT3G48740 // AT4G38160 // AT4G30220 // AT5G18620 // AT5G39210 // AT3G48870 // AT5G11670 // AT5G23120 // AT3G46320 // AT1G32990 // AT1G16720
GO:0050794	P	regulation of cellular process	112	570	4857	28362	0.065	0.94	// AT5G57660 // AT3G04210 // AT5G02290 // AT3G50950 // AT4G33050 // AT5G08050 // AT3G23050 // AT2G43010 // AT1G69040 // AT1G05805 // AT1G48480 // AT5G63310 // AT4G04695 // AT4G23810 // AT2G18328 // AT5G01810 // AT5G08330 // AT2G34620 // AT1G77490 // AT3G10040 // AT3G25070 // AT4G36570 // AT3G04730 // AT5G14920 // AT3G15540 // AT1G79700 // AT3G54560 // AT3G52400 // AT1G12580 // AT4G37260 // AT1G19…
GO:0018193	P	peptidyl-amino acid modification	10	570	284	28362	0.067	0.97	// AT5G66210 // AT3G01480 // AT4G21280 // AT4G05180 // AT1G12580 // AT5G01810 // AT5G55160 // AT3G15520 // AT4G35310 // AT4G04695
GO:0042180	P	cellular ketone metabolic process	5	570	106	28362	0.069	0.98	// AT4G13830 // AT1G69040 // AT3G03710 // AT4G20380 // AT1G79700
GO:0044255	P	cellular lipid metabolic process	10	570	649	28362	0.84	1	// AT3G06850 // AT4G13830 // AT4G11850 // AT5G21170 // AT3G03710 // AT1G79700 // AT2G15090 // AT5G16370 // AT2G37940 // AT5G40610
GO:0000003	P	reproduction	19	570	1721	28362	1	1	// AT5G57660 // AT1G35680 // AT3G48740 // AT4G11850 // AT3G54560 // AT5G49360 // AT3G45640 // AT4G37300 // AT3G15540 // AT3G44750 // AT5G18620 // AT3G07780 // AT2G04842 // AT4G17460 // AT5G52520 // AT1G05190 // AT2G15890 // AT1G13260 // AT4G27300
GO:0044550	P	secondary metabolite biosynthetic process	9	570	311	28362	0.18	1	// AT1G16410 // AT1G13110 // AT5G23010 // AT4G22690 // AT5G44070 // AT3G26180 // AT3G56400 // AT3G45640 // AT4G22710
GO:0048580	P	regulation of post-embryonic development	7	570	329	28362	0.49	1	// AT5G57660 // AT1G62380 // AT1G70410 // AT3G01500 // AT3G45640 // AT2G16365 // AT1G13260
GO:0046483	P	heterocycle metabolic process	93	570	4433	28362	0.35	1	// AT5G57660 // AT4G14342 // AT5G52520 // AT2G04842 // AT5G08050 // AT2G47220 // AT2G43010 // AT1G05805 // AT4G30220 // AT2G02570 // AT1G21120 // AT5G63310 // AT3G09260 // AT4G23810 // AT2G18328 // AT3G54560 // AT5G08330 // AT2G34620 // AT3G10040 // AT4G36570 // AT3G15540 // AT1G79700 // AT2G29630 // AT5G66520 // AT3G56710 // AT4G37260 // AT4G26530 // AT4G39260 // AT5G44070 // AT4G24350 // AT3G23…
GO:0009892	P	negative regulation of metabolic process	11	570	521	28362	0.48	1	// AT3G10040 // AT3G03710 // AT3G54560 // AT4G27230 // AT5G61590 // AT3G56400 // AT2G30424 // AT4G36730 // AT1G13260 // AT5G02810 // AT5G24470
GO:0009893	P	positive regulation of metabolic process	13	570	535	28362	0.29	1	// AT2G05070 // AT5G61590 // AT3G63140 // AT4G23810 // AT3G21200 // AT1G75500 // AT5G08050 // AT1G79700 // AT3G58120 // AT3G48360 // AT3G45640 // AT1G64280 // AT2G16365
GO:0009890	P	negative regulation of biosynthetic process	9	570	360	28362	0.31	1	// AT5G61590 // AT3G03710 // AT3G54560 // AT4G27230 // AT3G56400 // AT2G30424 // AT1G13260 // AT5G02810 // AT5G24470
GO:0009891	P	positive regulation of biosynthetic process	11	570	409	28362	0.21	1	// AT2G05070 // AT5G61590 // AT3G63140 // AT4G23810 // AT3G21200 // AT1G79700 // AT3G58120 // AT3G48360 // AT5G08050 // AT1G64280 // AT2G16365
GO:0090558	P	plant epidermis development	6	570	245	28362	0.37	1	// AT4G20780 // AT1G70410 // AT2G46600 // AT3G01500 // AT2G30424 // AT3G45640
GO:0050789	P	regulation of biological process	120	570	5306	28362	0.087	1	// AT5G57660 // AT3G04210 // AT5G02290 // AT3G50950 // AT4G33050 // AT5G08050 // AT3G23050 // AT2G43010 // AT1G69040 // AT1G05805 // AT1G48480 // AT5G63310 // AT4G04695 // AT4G23810 // AT2G18328 // AT5G01810 // AT5G08330 // AT2G34620 // AT1G77490 // AT3G10040 // AT3G25070 // AT4G36570 // AT3G52400 // AT5G14920 // AT3G15540 // AT1G79700 // AT3G54560 // AT5G22920 // AT1G12580 // AT4G37260 // AT3G07…
GO:0000902	P	cell morphogenesis	7	570	402	28362	0.7	1	// AT4G20780 // AT1G75500 // AT2G18300 // AT5G19530 // AT2G46600 // AT3G02170 // AT1G21270
GO:0032259	P	methylation	10	570	331	28362	0.14	1	// AT2G43910 // AT1G55450 // AT4G25080 // AT1G21100 // AT3G54560 // AT1G21130 // AT1G21120 // AT1G15125 // AT3G25470 // AT5G18150
GO:0018130	P	heterocycle biosynthetic process	68	570	2957	28362	0.14	1	// AT5G57660 // AT5G62980 // ATCG00480 // AT3G45640 // AT3G44750 // AT4G27230 // AT5G63310 // AT3G21200 // AT2G23290 // AT4G17460 // AT5G08050 // AT3G63140 // AT3G23050 // AT3G55010 // AT2G43010 // AT5G24470 // AT5G61590 // AT2G16365 // AT1G05805 // AT4G38160 // AT5G02810 // AT3G48360 // AT2G42040 // AT4G36730 // AT1G25550 // AT3G04730 // AT4G10100 // AT5G13630 // AT5G05090 // AT4G23810 // AT5G16…
GO:0048316	P	seed development	11	570	661	28362	0.77	1	// AT1G35680 // AT4G11850 // AT3G48740 // AT5G49360 // AT4G37300 // AT3G44750 // AT3G07780 // AT2G04842 // AT5G52520 // AT1G05190 // AT2G15890
GO:0006629	P	lipid metabolic process	14	570	994	28362	0.94	1	// AT3G06850 // AT2G17230 // AT4G11850 // AT2G37940 // AT3G03710 // AT5G16370 // AT1G79700 // AT2G15090 // AT5G21170 // AT4G13830 // AT1G76680 // AT2G26560 // AT5G40610 // AT2G39400
GO:0043412	P	macromolecule modification	59	570	2532	28362	0.14	1	// AT3G54560 // AT1G29930 // AT4G05180 // AT1G29910 // AT5G21170 // AT4G21280 // AT5G02290 // AT1G29920 // AT3G44750 // AT4G04570 // AT1G53440 // AT4G37610 // AT3G45640 // AT2G05100 // AT2G34420 // AT3G14840 // AT3G19850 // AT5G14660 // AT5G66210 // AT3G48360 // AT2G15390 // AT1G48480 // AT4G35310 // AT1G52290 // AT4G23180 // AT4G01330 // AT4G04695 // AT3G01480 // AT3G45780 // AT3G01316 // AT2G05…
GO:0009267	P	cellular response to starvation	5	570	153	28362	0.2	1	// AT5G38480 // AT3G03710 // AT3G06850 // AT2G27190 // AT3G53900
GO:0044723	P	single-organism carbohydrate metabolic process	10	570	613	28362	0.79	1	// AT3G57520 // AT2G19800 // AT5G57655 // AT4G26530 // AT5G66530 // AT1G21270 // AT3G47800 // AT5G19220 // AT2G15390 // AT2G36390
GO:0016070	P	RNA metabolic process	64	570	3403	28362	0.73	1	// AT5G57660 // AT4G14342 // AT5G08050 // AT3G44750 // AT3G15540 // AT3G58120 // AT2G24590 // AT2G04842 // AT4G17460 // AT3G23050 // AT2G47220 // AT5G24470 // AT5G61590 // AT2G16365 // AT1G05805 // AT4G38160 // AT4G30220 // AT4G24240 // AT2G02570 // AT3G48360 // AT4G27230 // AT2G42040 // AT4G36730 // AT1G25550 // AT3G04730 // AT3G63490 // AT5G05090 // AT4G23810 // AT5G16470 // AT3G01316 // AT3G63…
GO:0016071	P	mRNA metabolic process	6	570	409	28362	0.83	1	// AT2G24590 // AT4G14342 // AT3G03710 // AT4G39260 // AT4G30220 // AT2G02570
GO:0016072	P	rRNA metabolic process	5	570	188	28362	0.33	1	// AT3G01316 // AT3G63140 // AT2G33800 // AT3G63490 // AT3G03710
GO:0048367	P	shoot system development	15	570	896	28362	0.8	1	// AT4G23810 // AT5G57660 // AT1G64360 // AT3G54560 // AT3G15540 // AT1G14280 // AT5G37600 // AT5G51720 // AT3G45640 // AT3G56400 // AT4G01250 // AT4G17460 // AT5G52520 // AT1G76680 // AT1G13260
GO:0048366	P	leaf development	9	570	356	28362	0.29	1	// AT4G23810 // AT1G64360 // AT1G14280 // AT5G51720 // AT3G56400 // AT4G01250 // AT5G37600 // AT1G76680 // AT1G13260
GO:0010557	P	positive regulation of macromolecule biosynthetic process	9	570	373	28362	0.34	1	// AT4G23810 // AT5G61590 // AT3G63140 // AT1G79700 // AT3G58120 // AT3G48360 // AT5G08050 // AT1G64280 // AT2G16365
GO:0010556	P	regulation of macromolecule biosynthetic process	49	570	2666	28362	0.76	1	// AT5G57660 // AT5G08050 // AT3G44750 // AT4G27230 // AT2G23290 // AT4G17460 // AT3G23050 // AT2G43010 // AT5G24470 // AT5G61590 // AT2G16365 // AT1G05805 // AT4G38160 // AT5G02810 // AT3G48360 // AT4G36730 // AT1G25550 // AT3G04730 // AT5G05090 // AT4G23810 // AT5G16470 // AT3G63140 // AT1G68190 // AT2G18328 // AT3G54560 // AT2G18300 // AT4G01250 // AT1G64280 // AT5G51190 // AT3G56400 // AT2G30…
GO:0006753	P	nucleoside phosphate metabolic process	8	570	305	28362	0.28	1	// AT3G10620 // AT5G57655 // AT4G26530 // ATCG00480 // AT3G55010 // AT5G11670 // AT3G53900 // AT5G63310
GO:0010558	P	negative regulation of macromolecule biosynthetic process	7	570	339	28362	0.52	1	// AT3G54560 // AT4G27230 // AT3G56400 // AT2G30424 // AT1G13260 // AT5G02810 // AT5G24470
GO:0097306	P	cellular response to alcohol	9	570	267	28362	0.097	1	// AT2G05070 // AT1G12580 // AT5G01810 // AT5G66210 // AT2G38310 // AT3G48360 // AT3G45640 // AT4G35310 // AT4G04695
GO:1901565	P	organonitrogen compound catabolic process	6	570	164	28362	0.12	1	// AT3G30775 // AT5G44070 // AT1G03090 // AT1G32470 // AT2G44490 // AT3G09260
GO:0009414	P	response to water deprivation	11	570	347	28362	0.099	1	// AT2G05070 // AT5G61590 // AT5G65730 // AT2G41430 // AT5G23010 // AT3G30775 // AT2G05100 // AT4G24275 // AT1G08930 // AT3G23050 // AT3G44380
GO:0009415	P	response to water	11	570	355	28362	0.11	1	// AT2G05070 // AT5G61590 // AT5G65730 // AT2G41430 // AT5G23010 // AT3G30775 // AT2G05100 // AT4G24275 // AT1G08930 // AT3G23050 // AT3G44380
GO:0048229	P	gametophyte development	5	570	422	28362	0.93	1	// AT4G33050 // AT5G52520 // AT3G45640 // AT3G48360 // AT5G23420
GO:0032446	P	protein modification by small protein conjugation	9	570	550	28362	0.77	1	// AT2G02360 // AT3G19850 // AT3G16720 // AT4G37610 // AT3G48360 // AT1G64280 // AT1G63800 // AT4G14400 // AT5G55160
GO:0009653	P	anatomical structure morphogenesis	12	570	919	28362	0.96	1	// AT4G20780 // AT3G02170 // AT2G19800 // AT3G49780 // AT1G75500 // AT2G18300 // AT5G19530 // AT1G79700 // AT3G07780 // AT1G21270 // AT4G20380 // AT2G46600
GO:0044257	P	cellular protein catabolic process	7	570	444	28362	0.79	1	// AT4G37610 // AT1G63800 // AT3G48360 // AT4G35350 // AT2G27920 // AT3G16720 // AT5G23210
GO:0007049	P	cell cycle	5	570	558	28362	0.99	1	// AT5G67560 // AT4G38550 // AT1G22530 // AT5G55280 // AT5G61210
GO:0042592	P	homeostatic process	10	570	542	28362	0.65	1	// AT2G42580 // AT2G05070 // AT5G06690 // AT4G33520 // AT3G57330 // AT5G61440 // AT1G06830 // AT1G21270 // AT5G51720 // AT3G62930
GO:0042594	P	response to starvation	5	570	162	28362	0.23	1	// AT5G38480 // AT3G03710 // AT3G06850 // AT2G27190 // AT3G53900
GO:0007275	P	multicellular organism development	49	570	2811	28362	0.87	1	// AT2G42580 // AT5G57660 // AT1G35680 // AT5G23420 // AT5G49360 // AT1G64360 // AT2G33830 // AT5G18620 // AT3G44750 // AT3G07780 // AT4G33050 // AT5G51720 // AT2G04842 // AT4G17460 // AT2G43010 // AT5G24470 // AT1G28330 // AT2G16365 // AT1G62380 // AT3G63190 // AT3G48360 // AT2G28000 // AT3G48740 // AT2G15890 // AT1G76680 // AT4G23810 // AT3G49780 // AT3G54560 // AT1G70410 // AT1G14280 // AT3G01…
GO:0009826	P	unidimensional cell growth	5	570	296	28362	0.71	1	// AT3G02170 // AT1G75500 // AT1G21270 // AT2G18300 // AT5G19530
GO:0009737	P	response to abscisic acid	17	570	578	28362	0.083	1	// AT2G05070 // AT1G12580 // AT5G01810 // AT4G39260 // AT5G66210 // AT2G38310 // AT1G08930 // AT3G48360 // AT5G61210 // AT5G14920 // AT3G45640 // AT3G22060 // AT4G35310 // AT2G16850 // AT4G04695 // AT5G54270 // AT4G37260
GO:0009738	P	abscisic acid-activated signaling pathway	8	570	243	28362	0.12	1	// AT1G12580 // AT5G01810 // AT5G66210 // AT2G38310 // AT3G48360 // AT3G45640 // AT4G35310 // AT4G04695
GO:2000112	P	regulation of cellular macromolecule biosynthetic process	49	570	2657	28362	0.75	1	// AT5G57660 // AT5G08050 // AT3G44750 // AT4G27230 // AT2G23290 // AT4G17460 // AT3G23050 // AT2G43010 // AT5G24470 // AT5G61590 // AT2G16365 // AT1G05805 // AT4G38160 // AT5G02810 // AT3G48360 // AT4G36730 // AT1G25550 // AT3G04730 // AT5G05090 // AT4G23810 // AT5G16470 // AT3G63140 // AT1G68190 // AT2G18328 // AT3G54560 // AT2G18300 // AT4G01250 // AT1G64280 // AT5G51190 // AT3G56400 // AT2G30…
GO:2000113	P	negative regulation of cellular macromolecule biosynthetic process	7	570	323	28362	0.47	1	// AT3G54560 // AT4G27230 // AT3G56400 // AT2G30424 // AT1G13260 // AT5G02810 // AT5G24470
GO:0006468	P	protein phosphorylation	23	570	936	28362	0.19	1	// AT5G21170 // AT5G02290 // AT4G04570 // AT1G53440 // AT3G45640 // AT3G14840 // AT1G48480 // AT4G35310 // AT1G52290 // AT4G23180 // AT4G01330 // AT4G04695 // AT3G45780 // AT1G51805 // AT5G01810 // AT5G57630 // AT1G03740 // AT5G66210 // AT1G53430 // AT3G25070 // AT1G12580 // AT1G21270 // AT4G38470
GO:0019219	P	regulation of nucleobase-containing compound metabolic process	49	570	2529	28362	0.63	1	// AT5G57660 // AT5G08050 // AT3G44750 // AT4G27230 // AT2G23290 // AT4G17460 // AT3G23050 // AT2G43010 // AT5G24470 // AT5G61590 // AT2G16365 // AT1G05805 // AT4G38160 // AT5G02810 // AT3G48360 // AT4G36730 // AT1G25550 // AT3G04730 // AT5G05090 // AT4G23810 // AT5G16470 // AT3G63140 // AT1G68190 // AT2G18328 // AT3G54560 // AT2G18300 // AT4G01250 // AT1G64280 // AT5G51190 // AT3G56400 // AT2G30…
GO:0006461	P	protein complex assembly	10	570	287	28362	0.071	1	// AT3G01480 // AT3G48870 // AT4G25940 // AT3G48740 // AT5G39210 // AT5G11670 // AT5G23120 // AT3G46320 // AT4G10340 // AT1G16720
GO:0044767	P	single-organism developmental process	63	570	3131	28362	0.52	1	// AT2G42580 // AT4G20780 // AT5G57660 // AT2G19800 // AT1G35680 // AT5G23420 // AT5G19530 // AT1G64360 // AT2G33830 // AT5G18620 // AT3G44750 // AT2G46600 // AT3G07780 // AT5G52520 // AT5G51720 // AT4G20380 // AT2G04842 // AT4G17460 // AT2G43010 // AT5G24470 // AT1G28330 // AT2G16365 // AT4G35770 // AT5G66210 // AT3G63190 // AT3G02170 // AT3G48360 // AT4G35350 // AT3G48740 // AT4G36730 // AT1G76…
GO:0044765	P	single-organism transport	21	570	1004	28362	0.46	1	// AT1G19770 // AT3G45780 // AT3G48870 // AT1G07000 // AT1G11260 // AT3G48740 // AT3G52400 // AT2G18710 // AT3G11780 // AT5G19530 // AT1G12090 // AT5G54720 // AT4G24230 // AT1G75500 // AT4G16515 // AT4G24570 // AT1G08930 // AT1G57990 // AT5G48485 // ATCG00480 // AT2G45180
GO:0044764	P	multi-organism cellular process	6	570	156	28362	0.1	1	// AT1G75040 // AT2G26560 // AT3G44750 // AT3G07780 // AT3G04720 // AT4G14400
GO:0051276	P	chromosome organization	7	570	482	28362	0.85	1	// AT3G54560 // AT4G27230 // AT3G44750 // AT5G18620 // AT1G20693 // AT4G38550 // AT3G46320
GO:0048856	P	anatomical structure development	59	570	3146	28362	0.73	1	// AT2G42580 // AT4G20780 // AT5G57660 // AT2G19800 // AT1G35680 // AT5G23420 // AT5G19530 // AT1G64360 // AT2G33830 // AT5G18620 // AT3G44750 // AT2G46600 // AT3G07780 // AT5G52520 // AT5G51720 // AT4G20380 // AT2G04842 // AT4G17460 // AT2G43010 // AT5G24470 // AT1G28330 // AT2G16365 // AT1G62380 // AT3G63190 // AT3G02170 // AT3G48360 // AT4G35350 // AT3G48740 // AT2G15890 // AT1G76680 // AT5G49…
GO:0019693	P	ribose phosphate metabolic process	7	570	245	28362	0.23	1	// AT5G57655 // AT4G26530 // ATCG00480 // AT3G55010 // AT5G11670 // AT3G53900 // AT5G63310
GO:0006796	P	phosphate-containing compound metabolic process	39	570	1735	28362	0.26	1	// AT4G26530 // ATCG00480 // AT5G02290 // AT4G04570 // AT1G53440 // AT3G45640 // AT3G55010 // AT3G14840 // AT2G27190 // AT3G10620 // AT5G21170 // AT1G48480 // AT4G35310 // AT1G52290 // AT5G63310 // AT4G01330 // AT4G04695 // AT3G45780 // AT4G13830 // AT1G53430 // AT5G57655 // AT1G51805 // AT5G01810 // AT2G30170 // AT5G11670 // AT5G57630 // AT1G03740 // AT5G66210 // AT1G80180 // AT4G23180 // AT3G25…
GO:0006793	P	phosphorus metabolic process	39	570	1751	28362	0.28	1	// AT4G26530 // ATCG00480 // AT5G02290 // AT4G04570 // AT1G53440 // AT3G45640 // AT3G55010 // AT3G14840 // AT2G27190 // AT3G10620 // AT5G21170 // AT1G48480 // AT4G35310 // AT1G52290 // AT5G63310 // AT4G01330 // AT4G04695 // AT3G45780 // AT4G13830 // AT1G53430 // AT5G57655 // AT1G51805 // AT5G01810 // AT2G30170 // AT5G11670 // AT5G57630 // AT1G03740 // AT5G66210 // AT1G80180 // AT4G23180 // AT3G25…
GO:0048523	P	negative regulation of cellular process	14	570	594	28362	0.31	1	// AT3G54560 // AT3G25070 // AT3G57330 // AT3G52400 // AT3G03710 // AT5G01810 // AT4G27230 // AT1G19770 // AT4G20380 // AT3G56400 // AT2G30424 // AT1G13260 // AT5G02810 // AT5G24470
GO:0048522	P	positive regulation of cellular process	15	570	676	28362	0.39	1	// AT2G05070 // AT5G61590 // AT3G63140 // AT4G23810 // AT3G21200 // AT1G75500 // AT5G08050 // AT5G18620 // AT1G79700 // AT3G58120 // AT3G48360 // AT4G16515 // AT3G45640 // AT1G64280 // AT2G16365
GO:0044707	P	single-multicellular organism process	49	570	2875	28362	0.9	1	// AT2G42580 // AT5G57660 // AT1G35680 // AT5G23420 // AT5G49360 // AT1G64360 // AT2G33830 // AT5G18620 // AT3G44750 // AT3G07780 // AT4G33050 // AT5G51720 // AT2G04842 // AT4G17460 // AT2G43010 // AT5G24470 // AT1G28330 // AT2G16365 // AT1G62380 // AT3G63190 // AT3G48360 // AT2G28000 // AT3G48740 // AT2G15890 // AT1G76680 // AT4G23810 // AT3G49780 // AT3G54560 // AT1G70410 // AT1G14280 // AT3G01…
GO:0044712	P	single-organism catabolic process	12	570	585	28362	0.51	1	// AT2G43910 // AT3G57520 // AT2G19800 // AT4G11850 // AT4G26530 // AT3G30775 // AT5G44070 // AT1G03090 // AT2G44490 // AT1G32470 // AT2G26560 // AT3G09260
GO:0033036	P	macromolecule localization	18	570	996	28362	0.71	1	// AT5G59950 // AT3G18890 // AT1G49300 // AT3G48870 // AT3G52400 // AT2G18710 // AT3G11780 // AT4G16990 // AT1G12090 // AT5G54720 // AT5G44070 // AT2G44490 // AT4G16515 // AT2G45180 // AT4G24230 // AT5G61210 // AT5G48485 // AT5G49910
GO:2001141	P	regulation of RNA biosynthetic process	49	570	2445	28362	0.53	1	// AT5G57660 // AT5G08050 // AT3G44750 // AT4G27230 // AT2G23290 // AT4G17460 // AT3G23050 // AT2G43010 // AT5G24470 // AT5G61590 // AT2G16365 // AT1G05805 // AT4G38160 // AT5G02810 // AT3G48360 // AT4G36730 // AT1G25550 // AT3G04730 // AT5G05090 // AT4G23810 // AT5G16470 // AT3G63140 // AT1G68190 // AT2G18328 // AT3G54560 // AT2G18300 // AT4G01250 // AT1G64280 // AT5G51190 // AT3G56400 // AT2G30…
GO:0044248	P	cellular catabolic process	20	570	1024	28362	0.58	1	// AT2G43910 // AT1G77490 // AT2G19800 // AT2G37130 // AT3G03710 // AT1G63800 // AT4G37610 // AT3G30775 // AT1G71695 // AT5G44070 // AT1G03090 // AT3G48360 // AT2G44490 // AT4G09010 // AT2G27920 // AT3G16720 // AT1G32470 // AT5G23210 // AT3G09260 // AT4G35350
GO:0031668	P	cellular response to extracellular stimulus	6	570	204	28362	0.23	1	// AT2G27190 // AT3G06850 // AT5G21170 // AT3G03710 // AT3G53900 // AT5G38480
GO:0031669	P	cellular response to nutrient levels	6	570	170	28362	0.14	1	// AT2G27190 // AT3G06850 // AT5G21170 // AT3G03710 // AT3G53900 // AT5G38480
GO:0009793	P	embryo development ending in seed dormancy	8	570	478	28362	0.74	1	// AT1G35680 // AT4G11850 // AT3G48740 // AT4G37300 // AT3G07780 // AT2G04842 // AT1G05190 // AT2G15890
GO:0016567	P	protein ubiquitination	8	570	526	28362	0.83	1	// AT2G02360 // AT3G19850 // AT3G16720 // AT4G37610 // AT3G48360 // AT1G64280 // AT1G63800 // AT4G14400
GO:0010629	P	negative regulation of gene expression	9	570	415	28362	0.46	1	// AT3G10040 // AT3G54560 // AT4G27230 // AT3G56400 // AT2G30424 // AT4G36730 // AT1G13260 // AT5G02810 // AT5G24470
GO:0034660	P	ncRNA metabolic process	8	570	337	28362	0.37	1	// AT3G01316 // AT3G63140 // AT3G03710 // AT4G38160 // AT2G04842 // AT5G52520 // AT3G63490 // AT2G33800
GO:0044264	P	cellular polysaccharide metabolic process	8	570	273	28362	0.19	1	// AT4G03210 // AT5G65730 // AT1G32170 // AT4G30270 // AT5G19220 // AT2G15390 // AT2G36390 // AT5G57560
GO:0044262	P	cellular carbohydrate metabolic process	11	570	407	28362	0.2	1	// AT4G13830 // AT4G03210 // AT5G65730 // AT1G32170 // AT3G03710 // AT4G30270 // AT5G19220 // AT2G15390 // AT2G36390 // AT5G57560 // AT2G19800
GO:0044260	P	cellular macromolecule metabolic process	163	570	7410	28362	0.1	1	// AT1G29930 // AT4G05180 // AT5G57660 // AT4G03210 // AT1G75690 // AT4G21280 // AT5G02290 // AT3G44890 // AT3G58120 // AT2G04842 // AT5G19220 // AT5G08050 // AT2G47220 // AT5G55160 // AT2G43010 // AT4G14342 // AT1G05805 // AT4G30220 // AT2G02570 // AT5G47190 // AT2G15390 // AT1G48480 // AT4G25890 // AT4G04695 // AT3G56910 // AT4G23810 // AT1G29920 // AT2G18328 // AT5G01810 // AT2G42040 // AT5G08…
GO:0006364	P	rRNA processing	5	570	185	28362	0.32	1	// AT3G01316 // AT3G63140 // AT2G33800 // AT3G63490 // AT3G03710
GO:0019748	P	secondary metabolic process	14	570	492	28362	0.13	1	// AT1G16410 // AT2G43910 // AT1G13110 // AT5G61590 // AT5G23010 // AT4G22710 // AT4G22690 // AT5G44070 // AT3G26180 // AT2G44490 // AT3G56400 // AT3G45640 // AT3G09260 // AT4G37260
GO:0050793	P	regulation of developmental process	11	570	627	28362	0.71	1	// AT3G01500 // AT5G57660 // AT1G62380 // AT1G70410 // AT3G02170 // AT3G56400 // AT2G30424 // AT3G45640 // AT2G16365 // AT4G36730 // AT1G13260
GO:0050790	P	regulation of catalytic activity	6	570	213	28362	0.26	1	// AT4G13830 // AT5G21170 // AT3G48360 // AT3G45640 // AT5G62360 // AT3G16420
GO:0009889	P	regulation of biosynthetic process	54	570	2752	28362	0.59	1	// AT5G57660 // AT5G08050 // AT3G44750 // AT4G27230 // AT2G23290 // AT4G17460 // AT4G13830 // AT3G23050 // AT2G43010 // AT5G24470 // AT5G61590 // AT2G16365 // AT1G05805 // AT1G75040 // AT4G38160 // AT5G02810 // AT3G48360 // AT4G36730 // AT1G25550 // AT3G04730 // AT5G05090 // AT4G23810 // AT5G16470 // AT3G63140 // AT1G68190 // AT2G18328 // AT3G54560 // AT2G18300 // AT4G01250 // AT1G64280 // AT5G51…
GO:0009888	P	tissue development	9	570	577	28362	0.82	1	// AT4G20780 // AT3G01500 // AT3G45640 // AT1G70410 // AT5G19530 // AT2G46600 // AT3G07780 // AT2G30424 // AT4G17460
GO:0051239	P	regulation of multicellular organismal process	9	570	490	28362	0.65	1	// AT5G57660 // AT1G62380 // AT1G70410 // AT3G01500 // AT3G56400 // AT2G30424 // AT3G45640 // AT2G16365 // AT1G13260
GO:0090567	P	reproductive shoot system development	7	570	533	28362	0.91	1	// AT5G57660 // AT4G17460 // AT3G54560 // AT3G15540 // AT3G45640 // AT5G52520 // AT1G13260
GO:0051234	P	establishment of localization	47	570	2406	28362	0.6	1	// AT1G07000 // AT3G57330 // AT3G48740 // ATCG00480 // AT5G57490 // AT3G45780 // AT5G19530 // AT3G07780 // AT5G44070 // AT1G13210 // AT5G49910 // AT1G08930 // AT5G24470 // AT5G25250 // AT1G75310 // AT1G11260 // AT2G18710 // AT5G03380 // AT5G14910 // AT1G19770 // AT1G76405 // ATCG00430 // AT1G12090 // AT5G61210 // AT2G16850 // AT1G49300 // AT3G48870 // AT4G33520 // AT2G45180 // AT5G48485 // AT4G24…
GO:0090407	P	organophosphate biosynthetic process	9	570	293	28362	0.14	1	// AT3G55010 // AT4G13830 // ATCG00480 // AT3G03710 // AT4G10100 // AT2G29630 // AT3G53900 // AT5G63310 // AT5G40610
GO:0042545	P	cell wall modification	6	570	156	28362	0.1	1	// AT3G10720 // AT4G30270 // AT5G47500 // AT2G26440 // AT5G44070 // AT2G44490
GO:0042546	P	cell wall biogenesis	7	570	230	28362	0.19	1	// AT4G03210 // AT5G65730 // AT2G15390 // AT4G30270 // AT1G75500 // AT1G32170 // AT5G57560
GO:0051171	P	regulation of nitrogen compound metabolic process	54	570	2739	28362	0.58	1	// AT5G57660 // AT5G08050 // AT3G44750 // AT4G27230 // AT4G20380 // AT2G23290 // AT4G17460 // AT3G23050 // AT2G43010 // AT5G24470 // AT1G69040 // AT5G61590 // AT2G16365 // AT1G05805 // AT4G38160 // AT5G02810 // AT3G48360 // AT4G36730 // AT1G25550 // AT3G04730 // AT5G05090 // AT4G23810 // AT5G16470 // AT3G63140 // AT1G68190 // AT1G75500 // AT2G18328 // AT3G54560 // AT2G18300 // AT4G01250 // AT1G64…
GO:0006631	P	fatty acid metabolic process	5	570	252	28362	0.57	1	// AT5G21170 // AT2G15090 // AT3G06850 // AT5G16370 // AT1G79700
GO:0006732	P	coenzyme metabolic process	6	570	264	28362	0.44	1	// AT5G57655 // AT5G62980 // AT2G29630 // AT5G11670 // AT4G26530 // AT4G10100
GO:0051649	P	establishment of localization in cell	8	570	488	28362	0.76	1	// AT3G45780 // AT3G48870 // AT3G52400 // AT5G54720 // AT5G55280 // AT5G49910 // AT3G11780 // AT5G24470
GO:0009259	P	ribonucleotide metabolic process	5	570	221	28362	0.46	1	// AT4G26530 // ATCG00480 // AT5G63310 // AT3G55010 // AT3G53900
GO:0051241	P	negative regulation of multicellular organismal process	5	570	119	28362	0.099	1	// AT3G01500 // AT1G13260 // AT1G70410 // AT3G56400 // AT2G30424
GO:0051246	P	regulation of protein metabolic process	5	570	376	28362	0.87	1	// AT5G21170 // AT4G37610 // AT3G48360 // AT3G63140 // AT3G45640
GO:0051179	P	localization	49	570	2517	28362	0.61	1	// AT1G07000 // AT3G57330 // AT3G48740 // ATCG00480 // AT5G57490 // AT3G45780 // AT5G19530 // AT3G07780 // AT5G44070 // AT1G13210 // AT5G49910 // AT1G08930 // AT5G61210 // AT5G24470 // AT5G25250 // AT1G75310 // AT1G11260 // AT2G18710 // AT5G03380 // AT5G14910 // AT1G19770 // AT1G76405 // ATCG00430 // AT1G12090 // AT5G55280 // AT2G16850 // AT1G49300 // AT3G48870 // AT4G33520 // AT2G45180 // AT5G48…
GO:0048827	P	phyllome development	12	570	508	28362	0.33	1	// AT4G23810 // AT1G64360 // AT3G15540 // AT1G14280 // AT5G37600 // AT5G51720 // AT3G56400 // AT4G01250 // AT3G45640 // AT5G52520 // AT1G76680 // AT1G13260
GO:0048608	P	reproductive structure development	18	570	1265	28362	0.95	1	// AT5G57660 // AT1G35680 // AT3G48740 // AT4G11850 // AT3G54560 // AT5G49360 // AT3G45640 // AT4G37300 // AT3G15540 // AT3G44750 // AT5G18620 // AT3G07780 // AT2G04842 // AT4G17460 // AT5G52520 // AT1G05190 // AT2G15890 // AT1G13260
GO:0009408	P	response to heat	7	570	199	28362	0.11	1	// AT5G18620 // AT5G55160 // AT1G64280 // AT5G49910 // AT5G03720 // AT5G57560 // AT4G21870
GO:1901137	P	carbohydrate derivative biosynthetic process	8	570	329	28362	0.35	1	// AT2G15390 // ATCG00480 // AT3G55010 // AT3G56400 // AT3G53900 // AT2G36390 // AT5G63310 // AT5G40610
GO:1902680	P	positive regulation of RNA biosynthetic process	7	570	348	28362	0.55	1	// AT4G23810 // AT5G61590 // AT3G63140 // AT3G58120 // AT5G08050 // AT1G64280 // AT2G16365
GO:0048731	P	system development	30	570	1929	28362	0.94	1	// AT5G57660 // AT1G35680 // AT3G48740 // AT5G49360 // AT1G64360 // AT5G18620 // AT3G44750 // AT3G07780 // AT5G51720 // AT2G04842 // AT3G45640 // AT2G15890 // AT4G17460 // AT4G23810 // AT3G49780 // AT3G54560 // AT4G01250 // AT3G56400 // AT5G52520 // AT1G05190 // AT1G14280 // AT1G76680 // AT4G17490 // AT4G11850 // AT4G37300 // AT3G15540 // AT1G79700 // AT5G37600 // AT1G13260 // AT4G16515
GO:0061458	P	reproductive system development	18	570	1265	28362	0.95	1	// AT5G57660 // AT1G35680 // AT3G48740 // AT4G11850 // AT3G54560 // AT5G49360 // AT3G45640 // AT4G37300 // AT3G15540 // AT3G44750 // AT5G18620 // AT3G07780 // AT2G04842 // AT4G17460 // AT5G52520 // AT1G05190 // AT2G15890 // AT1G13260
GO:0034622	P	cellular macromolecular complex assembly	9	570	365	28362	0.32	1	// AT3G01480 // AT4G10340 // AT4G25940 // AT4G38160 // AT4G30220 // AT5G39210 // AT3G46320 // AT1G32990 // AT1G16720
GO:0006325	P	chromatin organization	6	570	322	28362	0.63	1	// AT3G54560 // AT4G27230 // AT3G44750 // AT5G18620 // AT1G20693 // AT3G46320
GO:0072330	P	monocarboxylic acid biosynthetic process	5	570	251	28362	0.57	1	// AT1G16410 // AT5G21170 // AT2G15090 // AT3G06850 // AT1G79700
GO:2000026	P	regulation of multicellular organismal development	9	570	442	28362	0.53	1	// AT5G57660 // AT1G62380 // AT1G70410 // AT3G01500 // AT3G56400 // AT2G30424 // AT3G45640 // AT2G16365 // AT1G13260
GO:0045935	P	positive regulation of nucleobase-containing compound metabolic process	8	570	379	28362	0.5	1	// AT4G23810 // AT5G61590 // AT3G63140 // AT3G58120 // AT3G48360 // AT5G08050 // AT1G64280 // AT2G16365
GO:0045934	P	negative regulation of nucleobase-containing compound metabolic process	7	570	249	28362	0.24	1	// AT3G54560 // AT4G27230 // AT3G56400 // AT2G30424 // AT1G13260 // AT5G02810 // AT5G24470
GO:0010817	P	regulation of hormone levels	6	570	251	28362	0.4	1	// AT1G16410 // AT1G75500 // AT5G19530 // AT1G19770 // AT4G16515 // AT2G43010
GO:0022414	P	reproductive process	19	570	1715	28362	1	1	// AT5G57660 // AT1G35680 // AT3G48740 // AT4G11850 // AT3G54560 // AT5G49360 // AT3G45640 // AT4G37300 // AT3G15540 // AT3G44750 // AT5G18620 // AT3G07780 // AT2G04842 // AT4G17460 // AT5G52520 // AT1G05190 // AT2G15890 // AT1G13260 // AT4G27300
GO:0043623	P	cellular protein complex assembly	5	570	197	28362	0.37	1	// AT5G39210 // AT4G10340 // AT3G01480 // AT1G16720 // AT4G25940
GO:0044403	P	symbiosis, encompassing mutualism through parasitism	5	570	151	28362	0.2	1	// AT3G07780 // AT4G14400 // AT3G04720 // AT2G26560 // AT1G75040
GO:0006396	P	RNA processing	13	570	693	28362	0.64	1	// AT3G01316 // AT3G63140 // AT4G14342 // AT3G03710 // AT4G39260 // AT4G30220 // AT4G38160 // AT2G02570 // AT2G24590 // AT2G33800 // AT2G29670 // AT2G47220 // AT3G63490
GO:0019222	P	regulation of metabolic process	66	570	3181	28362	0.41	1	// AT5G57660 // AT3G01480 // AT5G21170 // AT3G45640 // AT3G44750 // AT4G27230 // AT3G07780 // AT3G58120 // AT4G20380 // AT2G23290 // AT4G17460 // AT5G08050 // AT4G13830 // AT3G23050 // AT2G43010 // AT5G24470 // AT1G69040 // AT5G61590 // AT2G16365 // AT1G05805 // AT1G75040 // AT4G38160 // AT4G24240 // AT3G48360 // AT4G38550 // AT4G36730 // AT1G25550 // AT3G04730 // AT5G05090 // AT4G23810 // AT5G16…
GO:0048585	P	negative regulation of response to stimulus	6	570	169	28362	0.13	1	// AT3G25070 // AT3G52400 // AT5G01810 // AT1G19770 // AT1G64280 // AT3G09260
GO:0048584	P	positive regulation of response to stimulus	6	570	196	28362	0.21	1	// AT4G19530 // AT3G25070 // AT5G18620 // AT3G56400 // AT3G45640 // AT4G14400
GO:0008104	P	protein localization	9	570	715	28362	0.95	1	// AT3G18890 // AT1G49300 // AT3G48870 // AT3G52400 // AT2G18710 // AT5G54720 // AT5G61210 // AT4G16515 // AT5G49910
GO:1901362	P	organic cyclic compound biosynthetic process	69	570	3174	28362	0.26	1	// AT5G57660 // AT5G62980 // ATCG00480 // AT3G45640 // AT3G44750 // AT4G27230 // AT5G63310 // AT3G21200 // AT2G23290 // AT4G17460 // AT5G08050 // AT3G63140 // AT3G23050 // AT3G55010 // AT2G43010 // AT5G24470 // AT5G61590 // AT2G16365 // AT1G05805 // AT4G38160 // AT5G02810 // AT3G48360 // AT2G42040 // AT4G36730 // AT1G25550 // AT3G04730 // AT4G10100 // AT5G13630 // AT5G05090 // AT4G23810 // AT5G16…
GO:1901360	P	organic cyclic compound metabolic process	94	570	4700	28362	0.54	1	// AT5G57660 // AT4G14342 // AT5G52520 // AT2G04842 // AT5G08050 // AT2G47220 // AT2G43010 // AT1G05805 // AT4G30220 // AT2G02570 // AT1G21120 // AT5G63310 // AT3G09260 // AT4G23810 // AT2G18328 // AT3G54560 // AT5G08330 // AT2G34620 // AT3G10040 // AT4G36570 // AT2G35500 // AT3G15540 // AT1G79700 // AT2G29630 // AT5G66520 // AT3G56710 // AT4G37260 // AT4G26530 // AT4G39260 // AT5G44070 // AT4G24…
GO:0009966	P	regulation of signal transduction	8	570	227	28362	0.095	1	// AT1G75500 // AT5G01810 // AT1G19770 // AT4G20380 // AT3G45640 // AT1G64280 // AT4G14400 // AT2G43010
GO:0048869	P	cellular developmental process	17	570	1001	28362	0.79	1	// AT4G20780 // AT2G19620 // AT3G49780 // AT5G23420 // AT2G18300 // AT5G19530 // AT2G46600 // AT3G02170 // AT1G21270 // AT4G16515 // AT2G30424 // AT1G75500 // AT4G33050 // AT4G35350 // AT4G36730 // AT4G37260 // AT2G23290
GO:0048513	P	animal organ development	12	570	422	28362	0.15	1	// AT4G23810 // AT3G49780 // AT1G64360 // AT1G79700 // AT5G51720 // AT4G16515 // AT4G01250 // AT4G17460 // AT5G37600 // AT1G76680 // AT1G13260 // AT3G56400
GO:0006073	P	cellular glucan metabolic process	8	570	218	28362	0.08	1	// AT4G03210 // AT5G65730 // AT1G32170 // AT4G30270 // AT5G19220 // AT2G15390 // AT2G36390 // AT5G57560
GO:0048518	P	positive regulation of biological process	21	570	881	28362	0.25	1	// AT2G05070 // AT5G61590 // AT3G63140 // AT3G25070 // AT4G23810 // AT3G21200 // AT1G75500 // AT5G08050 // AT4G19530 // AT5G18620 // AT1G79700 // AT3G58120 // AT3G48360 // AT3G56400 // AT3G45640 // AT1G64280 // AT2G16365 // AT4G14400 // AT3G56710 // AT1G62380 // AT4G16515
GO:0048519	P	negative regulation of biological process	23	570	848	28362	0.097	1	// AT3G54560 // AT3G57330 // AT4G20380 // AT5G24470 // AT5G61590 // AT4G27230 // AT1G19770 // AT4G36730 // AT3G09260 // AT3G45780 // AT1G70410 // AT5G01810 // AT3G01500 // AT3G56400 // AT2G30424 // AT5G08330 // AT5G02810 // AT3G10040 // AT3G25070 // AT3G52400 // AT3G03710 // AT1G64280 // AT1G13260
GO:0034470	P	ncRNA processing	6	570	271	28362	0.46	1	// AT3G01316 // AT3G63140 // AT3G03710 // AT4G38160 // AT2G33800 // AT3G63490
GO:0045184	P	establishment of protein localization	8	570	661	28362	0.95	1	// AT3G18890 // AT1G49300 // AT3G48870 // AT3G52400 // AT2G18710 // AT5G54720 // AT5G61210 // AT5G49910
GO:0003006	P	developmental process involved in reproduction	18	570	1496	28362	0.99	1	// AT5G57660 // AT1G35680 // AT3G48740 // AT4G11850 // AT3G54560 // AT5G49360 // AT3G45640 // AT4G37300 // AT3G15540 // AT3G44750 // AT5G18620 // AT3G07780 // AT2G04842 // AT4G17460 // AT5G52520 // AT1G05190 // AT2G15890 // AT1G13260
GO:0003002	P	regionalization	6	570	173	28362	0.14	1	// AT2G42580 // AT1G80180 // AT3G44750 // AT2G33800 // AT2G30424 // AT3G45640
GO:0044702	P	single organism reproductive process	18	570	1544	28362	1	1	// AT5G57660 // AT1G35680 // AT3G48740 // AT4G11850 // AT3G54560 // AT5G49360 // AT3G45640 // AT4G37300 // AT3G15540 // AT3G44750 // AT4G27300 // AT3G07780 // AT2G04842 // AT4G17460 // AT5G52520 // AT1G05190 // AT2G15890 // AT1G13260
GO:0016192	P	vesicle-mediated transport	7	570	397	28362	0.69	1	// AT5G25250 // AT1G07000 // AT3G52400 // AT1G75310 // AT4G25940 // AT5G61210 // AT1G13210
GO:0016052	P	carbohydrate catabolic process	7	570	257	28362	0.27	1	// AT3G57520 // AT3G10720 // AT2G19800 // AT2G26440 // AT5G47500 // AT4G26530 // AT5G64570
GO:0019637	P	organophosphate metabolic process	13	570	524	28362	0.26	1	// AT3G55010 // AT4G13830 // AT3G10620 // AT5G57655 // AT4G26530 // ATCG00480 // AT3G03710 // AT4G10100 // AT2G29630 // AT5G11670 // AT3G53900 // AT5G63310 // AT5G40610
GO:0022607	P	cellular component assembly	15	570	586	28362	0.21	1	// AT3G01480 // AT4G10340 // AT4G25940 // AT3G48740 // AT4G38160 // AT4G30220 // AT5G18620 // AT5G39210 // AT3G48870 // AT5G11670 // AT5G08050 // AT5G23120 // AT3G46320 // AT1G32990 // AT1G16720
GO:0097659	P	nucleic acid-templated transcription	50	570	2561	28362	0.61	1	// AT5G57660 // AT5G08050 // AT3G44750 // AT4G27230 // AT2G23290 // AT4G17460 // AT3G23050 // AT2G43010 // AT5G24470 // AT5G61590 // AT2G16365 // AT1G05805 // AT4G38160 // AT5G02810 // AT3G48360 // AT2G42040 // AT4G36730 // AT1G25550 // AT3G04730 // AT5G05090 // AT4G23810 // AT5G16470 // AT3G63140 // AT1G68190 // AT2G18328 // AT3G54560 // AT2G18300 // AT4G01250 // AT1G64280 // AT5G51190 // AT3G56…
GO:0071215	P	cellular response to abscisic acid stimulus	9	570	267	28362	0.097	1	// AT2G05070 // AT1G12580 // AT5G01810 // AT5G66210 // AT2G38310 // AT3G48360 // AT3G45640 // AT4G35310 // AT4G04695
GO:0006812	P	cation transport	6	570	362	28362	0.73	1	// AT3G45780 // AT4G33520 // AT3G57330 // ATCG00480 // AT5G03380 // AT5G14910
GO:0006811	P	ion transport	14	570	645	28362	0.43	1	// AT3G45780 // AT4G33520 // AT1G52190 // AT3G57330 // ATCG00480 // AT5G57490 // AT5G03380 // AT5G14910 // AT5G44070 // AT1G76405 // AT1G35350 // AT4G24570 // AT4G24230 // AT2G16850
GO:0006810	P	transport	46	570	2391	28362	0.64	1	// AT1G07000 // AT3G57330 // AT3G48740 // ATCG00480 // AT5G57490 // AT3G45780 // AT5G19530 // AT3G07780 // AT5G44070 // AT1G13210 // AT5G49910 // AT1G08930 // AT5G24470 // AT5G25250 // AT1G75310 // AT1G11260 // AT2G18710 // AT5G03380 // AT5G14910 // AT1G19770 // AT1G76405 // ATCG00430 // AT1G12090 // AT2G16850 // AT1G49300 // AT3G48870 // AT4G33520 // AT2G45180 // AT5G48485 // AT4G24230 // AT5G54…
GO:0099402	P	plant organ development	14	570	961	28362	0.92	1	// AT4G23810 // AT1G64360 // AT3G15540 // AT1G14280 // AT3G07780 // AT5G37600 // AT5G51720 // AT4G16515 // AT4G01250 // AT3G45640 // AT5G52520 // AT1G76680 // AT1G13260 // AT3G56400
GO:0034654	P	nucleobase-containing compound biosynthetic process	54	570	2781	28362	0.62	1	// AT5G57660 // ATCG00480 // AT5G08050 // AT3G44750 // AT4G27230 // AT5G63310 // AT2G23290 // AT4G17460 // AT3G23050 // AT3G55010 // AT2G43010 // AT5G24470 // AT5G61590 // AT2G16365 // AT1G05805 // AT4G38160 // AT5G02810 // AT3G48360 // AT2G42040 // AT4G36730 // AT1G25550 // AT3G04730 // AT5G05090 // AT4G23810 // AT5G16470 // AT3G63140 // AT1G68190 // AT2G18328 // AT3G54560 // AT2G18300 // AT4G01…
GO:0010605	P	negative regulation of macromolecule metabolic process	9	570	480	28362	0.63	1	// AT3G10040 // AT3G54560 // AT4G27230 // AT3G56400 // AT2G30424 // AT4G36730 // AT1G13260 // AT5G02810 // AT5G24470
GO:0051603	P	proteolysis involved in cellular protein catabolic process	7	570	435	28362	0.77	1	// AT4G37610 // AT1G63800 // AT3G48360 // AT4G35350 // AT2G27920 // AT3G16720 // AT5G23210
GO:0010154	P	fruit development	12	570	702	28362	0.75	1	// AT1G35680 // AT4G11850 // AT3G48740 // AT5G49360 // AT4G37300 // AT3G44750 // AT3G07780 // AT2G04842 // AT4G17460 // AT5G52520 // AT1G05190 // AT2G15890
GO:0046907	P	intracellular transport	6	570	473	28362	0.91	1	// AT3G48870 // AT3G52400 // AT5G54720 // AT5G49910 // AT3G11780 // AT5G24470
GO:0044272	P	sulfur compound biosynthetic process	5	570	113	28362	0.084	1	// AT1G16410 // AT2G29630 // AT5G23010 // AT3G56400 // AT3G45640
GO:0006355	P	regulation of transcription, DNA-templated	49	570	2443	28362	0.53	1	// AT5G57660 // AT5G08050 // AT3G44750 // AT4G27230 // AT2G23290 // AT4G17460 // AT3G23050 // AT2G43010 // AT5G24470 // AT5G61590 // AT2G16365 // AT1G05805 // AT4G38160 // AT5G02810 // AT3G48360 // AT4G36730 // AT1G25550 // AT3G04730 // AT5G05090 // AT4G23810 // AT5G16470 // AT3G63140 // AT1G68190 // AT2G18328 // AT3G54560 // AT2G18300 // AT4G01250 // AT1G64280 // AT5G51190 // AT3G56400 // AT2G30…
GO:0006351	P	transcription, DNA-templated	50	570	2559	28362	0.6	1	// AT5G57660 // AT5G08050 // AT3G44750 // AT4G27230 // AT2G23290 // AT4G17460 // AT3G23050 // AT2G43010 // AT5G24470 // AT5G61590 // AT2G16365 // AT1G05805 // AT4G38160 // AT5G02810 // AT3G48360 // AT2G42040 // AT4G36730 // AT1G25550 // AT3G04730 // AT5G05090 // AT4G23810 // AT5G16470 // AT3G63140 // AT1G68190 // AT2G18328 // AT3G54560 // AT2G18300 // AT4G01250 // AT1G64280 // AT5G51190 // AT3G56…
GO:0032774	P	RNA biosynthetic process	50	570	2566	28362	0.61	1	// AT5G57660 // AT5G08050 // AT3G44750 // AT4G27230 // AT2G23290 // AT4G17460 // AT3G23050 // AT2G43010 // AT5G24470 // AT5G61590 // AT2G16365 // AT1G05805 // AT4G38160 // AT5G02810 // AT3G48360 // AT2G42040 // AT4G36730 // AT1G25550 // AT3G04730 // AT5G05090 // AT4G23810 // AT5G16470 // AT3G63140 // AT1G68190 // AT2G18328 // AT3G54560 // AT2G18300 // AT4G01250 // AT1G64280 // AT5G51190 // AT3G56…
GO:0030154	P	cell differentiation	12	570	768	28362	0.84	1	// AT4G20780 // AT2G19620 // AT3G49780 // AT5G23420 // AT5G19530 // AT2G46600 // AT4G16515 // AT2G30424 // AT4G33050 // AT4G35350 // AT4G37260 // AT2G23290
GO:0046777	P	protein autophosphorylation	5	570	133	28362	0.14	1	// AT3G45780 // AT4G35310 // AT1G12580 // AT4G04695 // AT5G66210
GO:0006139	P	nucleobase-containing compound metabolic process	75	570	4178	28362	0.87	1	// AT5G57660 // AT4G14342 // AT2G18328 // AT4G26530 // ATCG00480 // AT5G08050 // AT3G44750 // AT3G15540 // AT5G24470 // AT3G58120 // AT2G24590 // AT2G04842 // AT4G17460 // AT2G47220 // AT3G55010 // AT2G43010 // AT5G11670 // AT3G23050 // AT5G61590 // AT2G16365 // AT1G05805 // AT3G10620 // AT5G63310 // AT4G38160 // AT4G30220 // AT4G24240 // AT2G02570 // AT3G48360 // AT4G27230 // AT2G42040 // AT4G36…
GO:0009116	P	nucleoside metabolic process	5	570	258	28362	0.59	1	// AT4G26530 // ATCG00480 // AT5G63310 // AT4G24350 // AT3G53900
GO:0043933	P	macromolecular complex subunit organization	20	570	745	28362	0.12	1	// AT4G27230 // AT4G10340 // AT3G01480 // AT4G25940 // AT3G48740 // AT3G54560 // AT4G30220 // AT3G62910 // AT4G38160 // AT3G44750 // AT3G63190 // AT1G20693 // AT5G39210 // AT3G48870 // AT5G11670 // AT1G16720 // AT5G23120 // AT3G46320 // AT1G32990 // AT5G18620
GO:0006508	P	proteolysis	11	570	907	28362	0.97	1	// AT1G66180 // AT2G45180 // AT4G37610 // AT4G22485 // AT1G63800 // AT3G48360 // AT4G35350 // AT4G16563 // AT2G27920 // AT3G16720 // AT5G23210
GO:0060560	P	developmental growth involved in morphogenesis	5	570	334	28362	0.8	1	// AT3G02170 // AT1G75500 // AT1G21270 // AT2G18300 // AT5G19530
GO:1903508	P	positive regulation of nucleic acid-templated transcription	7	570	348	28362	0.55	1	// AT4G23810 // AT5G61590 // AT3G63140 // AT3G58120 // AT5G08050 // AT1G64280 // AT2G16365
GO:0044042	P	glucan metabolic process	8	570	218	28362	0.08	1	// AT4G03210 // AT5G65730 // AT1G32170 // AT4G30270 // AT5G19220 // AT2G15390 // AT2G36390 // AT5G57560
GO:0032501	P	multicellular organismal process	50	570	3032	28362	0.94	1	// AT2G42580 // AT5G57660 // AT1G35680 // AT5G23420 // AT5G49360 // AT1G64360 // AT2G33830 // AT5G18620 // AT3G44750 // AT4G27300 // AT3G07780 // AT4G33050 // AT5G51720 // AT2G04842 // AT4G17460 // AT2G43010 // AT5G24470 // AT1G28330 // AT2G16365 // AT1G62380 // AT3G63190 // AT3G48360 // AT2G28000 // AT3G48740 // AT2G15890 // AT1G76680 // AT4G23810 // AT3G49780 // AT3G54560 // AT1G70410 // AT1G14…
GO:0006725	P	cellular aromatic compound metabolic process	94	570	4588	28362	0.44	1	// AT5G57660 // AT4G14342 // AT5G52520 // AT2G04842 // AT5G08050 // AT2G47220 // AT2G43010 // AT1G05805 // AT4G30220 // AT2G02570 // AT1G21120 // AT5G63310 // AT3G09260 // AT4G23810 // AT2G18328 // AT3G54560 // AT5G08330 // AT2G34620 // AT3G10040 // AT4G36570 // AT2G35500 // AT3G15540 // AT1G79700 // AT2G29630 // AT5G66520 // AT3G56710 // AT4G37260 // AT4G26530 // AT4G39260 // AT5G44070 // AT4G24…
GO:1903506	P	regulation of nucleic acid-templated transcription	49	570	2445	28362	0.53	1	// AT5G57660 // AT5G08050 // AT3G44750 // AT4G27230 // AT2G23290 // AT4G17460 // AT3G23050 // AT2G43010 // AT5G24470 // AT5G61590 // AT2G16365 // AT1G05805 // AT4G38160 // AT5G02810 // AT3G48360 // AT4G36730 // AT1G25550 // AT3G04730 // AT5G05090 // AT4G23810 // AT5G16470 // AT3G63140 // AT1G68190 // AT2G18328 // AT3G54560 // AT2G18300 // AT4G01250 // AT1G64280 // AT5G51190 // AT3G56400 // AT2G30…
GO:1903507	P	negative regulation of nucleic acid-templated transcription	7	570	231	28362	0.19	1	// AT3G54560 // AT4G27230 // AT3G56400 // AT2G30424 // AT1G13260 // AT5G02810 // AT5G24470
GO:0051253	P	negative regulation of RNA metabolic process	7	570	232	28362	0.19	1	// AT3G54560 // AT4G27230 // AT3G56400 // AT2G30424 // AT1G13260 // AT5G02810 // AT5G24470
GO:0051252	P	regulation of RNA metabolic process	49	570	2474	28362	0.56	1	// AT5G57660 // AT5G08050 // AT3G44750 // AT4G27230 // AT2G23290 // AT4G17460 // AT3G23050 // AT2G43010 // AT5G24470 // AT5G61590 // AT2G16365 // AT1G05805 // AT4G38160 // AT5G02810 // AT3G48360 // AT4G36730 // AT1G25550 // AT3G04730 // AT5G05090 // AT4G23810 // AT5G16470 // AT3G63140 // AT1G68190 // AT2G18328 // AT3G54560 // AT2G18300 // AT4G01250 // AT1G64280 // AT5G51190 // AT3G56400 // AT2G30…
GO:0051254	P	positive regulation of RNA metabolic process	7	570	356	28362	0.58	1	// AT4G23810 // AT5G61590 // AT3G63140 // AT3G58120 // AT5G08050 // AT1G64280 // AT2G16365
GO:0007389	P	pattern specification process	6	570	201	28362	0.23	1	// AT2G42580 // AT1G80180 // AT3G44750 // AT2G33800 // AT2G30424 // AT3G45640
GO:0032989	P	cellular component morphogenesis	7	570	436	28362	0.77	1	// AT4G20780 // AT1G75500 // AT2G18300 // AT5G19530 // AT2G46600 // AT3G02170 // AT1G21270
GO:0071702	P	organic substance transport	21	570	1234	28362	0.81	1	// AT5G59950 // AT3G18890 // AT1G49300 // AT3G48870 // AT1G11260 // AT3G48740 // AT3G52400 // AT2G18710 // AT3G11780 // AT4G24230 // AT1G12090 // AT5G54720 // AT1G52190 // AT5G61210 // AT5G49910 // AT4G24570 // AT1G08930 // AT1G57990 // AT1G19770 // AT5G48485 // AT2G45180
GO:1902679	P	negative regulation of RNA biosynthetic process	7	570	231	28362	0.19	1	// AT3G54560 // AT4G27230 // AT3G56400 // AT2G30424 // AT1G13260 // AT5G02810 // AT5G24470
GO:0034220	P	ion transmembrane transport	6	570	255	28362	0.41	1	// AT3G45780 // AT4G33520 // AT3G57330 // ATCG00480 // AT4G24570 // AT2G16850
GO:0009059	P	macromolecule biosynthetic process	93	570	4511	28362	0.41	1	// AT5G57660 // AT3G44890 // AT5G52520 // AT2G04842 // AT5G19220 // AT5G08050 // AT3G23050 // AT2G43010 // AT1G05805 // AT5G47190 // AT4G25890 // AT3G56910 // AT4G23810 // AT2G18328 // AT3G54560 // AT5G08330 // AT2G34620 // AT3G10040 // AT4G36570 // AT1G74270 // AT3G15540 // AT1G79700 // AT1G16720 // AT4G30690 // AT3G56710 // AT4G37260 // AT3G10610 // AT2G43030 // AT3G56020 // AT5G14660 // AT3G63…
GO:0009117	P	nucleotide metabolic process	7	570	302	28362	0.41	1	// AT5G57655 // AT4G26530 // ATCG00480 // AT3G55010 // AT5G11670 // AT3G53900 // AT5G63310
GO:0051172	P	negative regulation of nitrogen compound metabolic process	7	570	356	28362	0.58	1	// AT3G54560 // AT4G27230 // AT3G56400 // AT2G30424 // AT1G13260 // AT5G02810 // AT5G24470
GO:0051173	P	positive regulation of nitrogen compound metabolic process	10	570	399	28362	0.29	1	// AT4G23810 // AT5G61590 // AT3G63140 // AT1G75500 // AT3G21200 // AT3G58120 // AT3G48360 // AT5G08050 // AT1G64280 // AT2G16365
GO:0009056	P	catabolic process	29	570	1430	28362	0.51	1	// AT2G43910 // AT3G57520 // AT2G19800 // AT4G26530 // AT5G44070 // AT2G27920 // AT5G23210 // AT2G26560 // AT5G64570 // AT3G48360 // AT1G32470 // AT4G35350 // AT3G09260 // AT3G10720 // AT2G37130 // AT5G47500 // AT3G30775 // AT1G03090 // AT1G63800 // AT1G77490 // AT2G26440 // AT4G11850 // AT3G03710 // AT1G71695 // AT4G37610 // AT2G44490 // AT4G09010 // AT3G16720 // AT5G40610
GO:0009057	P	macromolecule catabolic process	12	570	747	28362	0.82	1	// AT3G10720 // AT2G26440 // AT5G47500 // AT3G03710 // AT4G37610 // AT1G63800 // AT3G48360 // AT4G35350 // AT2G27920 // AT3G16720 // AT5G23210 // AT5G64570
GO:1902578	P	single-organism localization	21	570	1040	28362	0.52	1	// AT1G19770 // AT3G45780 // AT3G48870 // AT1G07000 // AT1G11260 // AT3G48740 // AT3G52400 // AT2G18710 // AT3G11780 // AT5G19530 // AT1G12090 // AT5G54720 // AT4G24230 // AT1G75500 // AT4G16515 // AT4G24570 // AT1G08930 // AT1G57990 // AT5G48485 // ATCG00480 // AT2G45180
GO:0051641	P	cellular localization	10	570	601	28362	0.77	1	// AT3G45780 // AT3G48870 // AT3G52400 // AT5G54720 // AT5G44070 // AT2G44490 // AT5G49910 // AT3G11780 // AT5G55280 // AT5G24470
GO:0097305	P	response to alcohol	17	570	583	28362	0.088	1	// AT2G05070 // AT1G12580 // AT5G01810 // AT4G39260 // AT5G66210 // AT2G38310 // AT1G08930 // AT3G48360 // AT5G61210 // AT5G14920 // AT3G45640 // AT3G22060 // AT4G35310 // AT2G16850 // AT4G04695 // AT5G54270 // AT4G37260
GO:0080090	P	regulation of primary metabolic process	56	570	2889	28362	0.63	1	// AT5G57660 // AT5G21170 // AT3G45640 // AT3G44750 // AT4G27230 // AT4G20380 // AT2G23290 // AT4G17460 // AT5G08050 // AT4G13830 // AT3G23050 // AT2G43010 // AT5G24470 // AT1G69040 // AT5G61590 // AT2G16365 // AT1G05805 // AT1G75040 // AT4G38160 // AT5G02810 // AT3G48360 // AT4G36730 // AT1G25550 // AT3G04730 // AT5G05090 // AT4G23810 // AT5G16470 // AT3G63140 // AT1G68190 // AT2G18328 // AT3G54…
GO:0006820	P	anion transport	7	570	227	28362	0.18	1	// AT3G45780 // AT1G52190 // AT5G57490 // AT5G44070 // AT1G35350 // AT4G24570 // AT4G24230
GO:0010604	P	positive regulation of macromolecule metabolic process	10	570	482	28362	0.5	1	// AT4G23810 // AT5G61590 // AT3G63140 // AT5G08050 // AT1G79700 // AT3G58120 // AT3G48360 // AT3G45640 // AT1G64280 // AT2G16365
GO:0070727	P	cellular macromolecule localization	6	570	441	28362	0.88	1	// AT3G48870 // AT3G52400 // AT5G54720 // AT5G44070 // AT2G44490 // AT5G49910
GO:0070647	P	protein modification by small protein conjugation or removal	9	570	610	28362	0.86	1	// AT2G02360 // AT3G19850 // AT3G16720 // AT4G37610 // AT3G48360 // AT1G64280 // AT1G63800 // AT4G14400 // AT5G55160
GO:0044419	P	interspecies interaction between organisms	5	570	154	28362	0.21	1	// AT3G07780 // AT4G14400 // AT3G04720 // AT2G26560 // AT1G75040
GO:0019725	P	cellular homeostasis	6	570	314	28362	0.6	1	// AT2G42580 // AT5G06690 // AT5G61440 // AT1G06830 // AT1G21270 // AT3G62930
GO:0060255	P	regulation of macromolecule metabolic process	53	570	2998	28362	0.85	1	// AT5G57660 // AT5G21170 // AT3G45640 // AT3G44750 // AT4G27230 // AT3G07780 // AT2G23290 // AT4G17460 // AT5G08050 // AT3G23050 // AT2G43010 // AT5G24470 // AT5G61590 // AT2G16365 // AT1G05805 // AT4G38160 // AT4G24240 // AT3G48360 // AT4G38550 // AT4G36730 // AT1G25550 // AT3G04730 // AT5G05090 // AT4G23810 // AT5G16470 // AT3G63140 // AT1G68190 // AT2G18328 // AT3G54560 // AT2G18300 // AT4G01…
GO:0032787	P	monocarboxylic acid metabolic process	10	570	481	28362	0.5	1	// AT1G16410 // AT3G06850 // AT4G13830 // AT5G21170 // AT3G03710 // AT5G16370 // AT1G79700 // AT2G15090 // AT5G11670 // AT4G26530
GO:0030163	P	protein catabolic process	7	570	467	28362	0.83	1	// AT4G37610 // AT1G63800 // AT3G48360 // AT4G35350 // AT2G27920 // AT3G16720 // AT5G23210
GO:0010876	P	lipid localization	5	570	199	28362	0.37	1	// AT4G24230 // AT2G45180 // AT1G12090 // AT3G11780 // AT5G48485
GO:0048878	P	chemical homeostasis	5	570	352	28362	0.83	1	// AT3G57330 // AT2G05070 // AT1G21270 // AT5G51720 // AT4G33520
GO:0019438	P	aromatic compound biosynthetic process	71	570	3058	28362	0.12	1	// AT5G57660 // AT5G62980 // ATCG00480 // AT3G45640 // AT3G44750 // AT4G27230 // AT5G63310 // AT3G21200 // AT2G23290 // AT4G17460 // AT5G08050 // AT3G63140 // AT3G23050 // AT3G55010 // AT2G43010 // AT5G24470 // AT5G61590 // AT2G16365 // AT1G05805 // AT1G21130 // AT1G21100 // AT4G38160 // AT5G02810 // AT1G21120 // AT3G48360 // AT2G42040 // AT4G36730 // AT1G25550 // AT3G04730 // AT5G13630 // AT5G05…
GO:0048589	P	developmental growth	5	570	458	28362	0.95	1	// AT3G02170 // AT1G75500 // AT1G21270 // AT2G18300 // AT5G19530
GO:1901575	P	organic substance catabolic process	24	570	1249	28362	0.62	1	// AT3G57520 // AT2G19800 // AT4G26530 // AT5G44070 // AT2G27920 // AT5G64570 // AT2G26560 // AT5G23210 // AT3G48360 // AT1G32470 // AT4G35350 // AT3G09260 // AT3G10720 // AT5G47500 // AT3G30775 // AT1G03090 // AT1G63800 // AT2G26440 // AT4G11850 // AT3G03710 // AT4G37610 // AT2G44490 // AT3G16720 // AT5G40610
GO:0016049	P	cell growth	5	570	428	28362	0.93	1	// AT3G02170 // AT1G75500 // AT1G21270 // AT2G18300 // AT5G19530
GO:0065007	P	biological regulation	131	570	6062	28362	0.19	1	// AT5G57660 // AT3G04210 // AT5G02290 // AT3G50950 // AT5G19530 // AT5G67560 // AT5G08050 // AT3G23050 // AT2G43010 // AT1G69040 // AT1G05805 // AT5G61440 // AT1G48480 // AT5G63310 // AT4G04695 // AT4G23810 // AT2G18328 // AT5G01810 // AT3G05730 // AT5G62360 // AT5G08330 // AT2G34620 // AT1G77490 // AT3G10040 // AT3G25070 // AT4G36570 // AT3G52400 // AT5G14920 // AT3G15540 // AT1G79700 // AT3G54…
GO:0065009	P	regulation of molecular function	9	570	249	28362	0.071	1	// AT3G45780 // AT4G13830 // AT5G21170 // AT3G48360 // AT3G45640 // AT5G62360 // AT5G08330 // AT3G56710 // AT3G16420
GO:0065008	P	regulation of biological quality	21	570	1255	28362	0.83	1	// AT1G16410 // AT2G42580 // AT5G06690 // AT4G33520 // AT2G05070 // AT3G57330 // AT1G75500 // AT1G06830 // AT5G61440 // AT5G19530 // AT1G19770 // AT3G05727 // AT1G21270 // AT5G51720 // AT1G67230 // AT4G16515 // AT3G62930 // AT2G43535 // AT3G04720 // AT2G43010 // AT3G05730
GO:0032502	P	developmental process	66	570	3233	28362	0.47	1	// AT2G42580 // AT4G20780 // AT5G57660 // AT2G19800 // AT1G35680 // AT5G23420 // AT5G19530 // AT1G64360 // AT2G33830 // AT5G18620 // AT3G44750 // AT2G46600 // AT3G07780 // AT5G52520 // AT5G51720 // AT4G20380 // AT2G04842 // AT4G17460 // AT2G43010 // AT5G24470 // AT1G28330 // AT2G16365 // AT4G35770 // AT5G66210 // AT4G38160 // AT3G63190 // AT3G02170 // AT3G48360 // AT4G35350 // AT3G48740 // AT2G42…
GO:0006869	P	lipid transport	5	570	174	28362	0.28	1	// AT4G24230 // AT2G45180 // AT1G12090 // AT3G11780 // AT5G48485
GO:0016310	P	phosphorylation	26	570	1254	28362	0.46	1	// AT5G21170 // AT5G02290 // AT4G04570 // AT1G53440 // AT3G45640 // AT3G14840 // AT4G26530 // AT1G48480 // AT4G35310 // AT1G52290 // AT5G63310 // AT4G01330 // AT4G04695 // AT3G45780 // AT1G53430 // AT1G51805 // AT5G01810 // AT5G57630 // AT1G03740 // AT5G66210 // AT1G80180 // AT4G23180 // AT3G25070 // AT1G12580 // AT1G21270 // AT4G38470
GO:0009791	P	post-embryonic development	26	570	1576	28362	0.87	1	// AT5G57660 // AT1G35680 // AT3G48740 // AT5G49360 // AT4G17460 // AT5G18620 // AT3G44750 // AT3G07780 // AT2G04842 // AT3G45640 // AT2G43010 // AT5G24470 // AT2G16365 // AT1G62380 // AT2G15890 // AT1G70410 // AT3G54560 // AT3G01500 // AT4G16515 // AT5G52520 // AT1G05190 // AT4G11850 // AT3G21200 // AT4G37300 // AT3G15540 // AT1G13260
GO:0009790	P	embryo development	10	570	571	28362	0.71	1	// AT1G35680 // AT4G11850 // AT3G48740 // AT4G37300 // AT3G63190 // AT3G07780 // AT2G04842 // AT1G05190 // AT2G15890 // AT2G28000
GO:0034641	P	cellular nitrogen compound metabolic process	131	570	5805	28362	0.079	1	// AT5G57660 // AT4G14342 // AT3G44890 // AT5G19530 // AT5G52520 // AT2G04842 // AT5G08050 // AT2G47220 // AT2G43010 // AT1G69040 // AT1G05805 // AT4G30220 // AT2G02570 // AT1G21120 // AT5G47190 // AT4G25890 // AT3G09260 // AT3G56910 // AT4G23810 // AT2G18328 // AT3G54560 // AT5G08330 // AT2G34620 // AT3G10040 // AT4G36570 // AT3G04730 // AT3G15540 // AT1G79700 // AT2G29630 // AT1G16720 // AT4G30…
GO:0045229	P	external encapsulating structure organization	13	570	551	28362	0.32	1	// AT3G10720 // AT4G03210 // AT5G47500 // AT2G26440 // AT5G44070 // AT1G32170 // AT5G65730 // AT4G30270 // AT1G75500 // AT2G44490 // AT2G15390 // AT4G23820 // AT5G57560
GO:0034645	P	cellular macromolecule biosynthetic process	93	570	4455	28362	0.36	1	// AT5G57660 // AT3G44890 // AT5G52520 // AT2G04842 // AT5G19220 // AT5G08050 // AT3G23050 // AT2G43010 // AT1G05805 // AT5G47190 // AT4G25890 // AT3G56910 // AT4G23810 // AT2G18328 // AT3G54560 // AT5G08330 // AT2G34620 // AT3G10040 // AT4G36570 // AT1G74270 // AT3G15540 // AT1G79700 // AT1G16720 // AT4G30690 // AT3G56710 // AT4G37260 // AT3G10610 // AT2G43030 // AT3G56020 // AT5G14660 // AT3G63…
GO:0009651	P	response to salt stress	14	570	574	28362	0.27	1	// AT1G55450 // AT4G30660 // AT1G62380 // AT5G07440 // AT5G14920 // AT5G57630 // AT4G39260 // AT1G49300 // AT3G48360 // AT2G15390 // AT1G08930 // AT5G18170 // AT3G04720 // AT3G09260
GO:0008610	P	lipid biosynthetic process	8	570	522	28362	0.82	1	// AT3G06850 // AT4G13830 // AT5G21170 // AT3G03710 // AT1G79700 // AT2G15090 // AT2G37940 // AT5G40610
GO:0008380	P	RNA splicing	5	570	236	28362	0.52	1	// AT2G24590 // AT4G14342 // AT4G39260 // AT4G30220 // AT4G38160
GO:0045892	P	negative regulation of transcription, DNA-templated	7	570	215	28362	0.15	1	// AT3G54560 // AT4G27230 // AT3G56400 // AT2G30424 // AT1G13260 // AT5G02810 // AT5G24470
GO:0045893	P	positive regulation of transcription, DNA-templated	7	570	347	28362	0.55	1	// AT4G23810 // AT5G61590 // AT3G63140 // AT3G58120 // AT5G08050 // AT1G64280 // AT2G16365
GO:0045454	P	cell redox homeostasis	5	570	147	28362	0.18	1	// AT2G42580 // AT5G61440 // AT5G06690 // AT3G62930 // AT1G06830
GO:0055085	P	transmembrane transport	11	570	667	28362	0.78	1	// AT3G45780 // AT3G48870 // AT4G33520 // AT1G11260 // AT3G57330 // ATCG00480 // AT5G57490 // AT5G54720 // AT4G24570 // AT1G08930 // AT2G16850
GO:0055086	P	nucleobase-containing small molecule metabolic process	9	570	370	28362	0.33	1	// AT3G10620 // AT5G57655 // AT4G26530 // ATCG00480 // AT3G55010 // AT4G24350 // AT5G11670 // AT3G53900 // AT5G63310
GO:0051093	P	negative regulation of developmental process	5	570	125	28362	0.11	1	// AT3G01500 // AT1G13260 // AT1G70410 // AT3G56400 // AT2G30424
GO:0005976	P	polysaccharide metabolic process	12	570	432	28362	0.17	1	// AT3G10720 // AT4G03210 // AT2G26440 // AT5G47500 // AT1G32170 // AT5G65730 // AT4G30270 // AT5G19220 // AT2G15390 // AT2G36390 // AT5G57560 // AT5G64570
GO:0043170	P	macromolecule metabolic process	174	570	8111	28362	0.17	1	// AT1G29930 // AT4G05180 // AT5G57660 // AT4G03210 // AT1G75690 // AT4G21280 // AT5G02290 // AT3G44890 // AT3G58120 // AT2G04842 // AT5G19220 // AT5G08050 // AT2G47220 // AT5G55160 // AT2G43010 // AT4G14342 // AT1G05805 // AT4G30220 // AT2G02570 // AT5G47190 // AT2G15390 // AT1G48480 // AT4G25890 // AT4G04695 // AT3G56910 // AT4G23810 // AT1G29920 // AT5G47500 // AT1G66180 // AT2G18328 // AT5G01…
GO:0010628	P	positive regulation of gene expression	7	570	383	28362	0.65	1	// AT4G23810 // AT5G61590 // AT3G63140 // AT3G58120 // AT5G08050 // AT1G64280 // AT2G16365
GO:0009991	P	response to extracellular stimulus	8	570	225	28362	0.091	1	// AT2G27190 // AT3G06850 // AT1G66180 // AT5G21170 // AT3G03710 // AT2G29630 // AT3G53900 // AT5G38480
GO:0031328	P	positive regulation of cellular biosynthetic process	10	570	396	28362	0.28	1	// AT4G23810 // AT5G61590 // AT3G63140 // AT3G21200 // AT1G79700 // AT3G58120 // AT3G48360 // AT5G08050 // AT1G64280 // AT2G16365
GO:0031327	P	negative regulation of cellular biosynthetic process	8	570	355	28362	0.42	1	// AT3G03710 // AT3G54560 // AT4G27230 // AT3G56400 // AT2G30424 // AT1G13260 // AT5G02810 // AT5G24470
GO:0031326	P	regulation of cellular biosynthetic process	52	570	2734	28362	0.68	1	// AT5G57660 // AT5G08050 // AT3G44750 // AT4G27230 // AT2G23290 // AT4G17460 // AT4G13830 // AT3G23050 // AT2G43010 // AT5G24470 // AT5G61590 // AT2G16365 // AT1G05805 // AT4G38160 // AT5G02810 // AT3G48360 // AT4G36730 // AT1G25550 // AT3G04730 // AT5G05090 // AT4G23810 // AT5G16470 // AT3G63140 // AT1G68190 // AT2G18328 // AT3G54560 // AT2G18300 // AT4G01250 // AT1G64280 // AT5G51190 // AT3G56…
GO:0031325	P	positive regulation of cellular metabolic process	13	570	495	28362	0.21	1	// AT2G05070 // AT5G61590 // AT3G63140 // AT4G23810 // AT3G21200 // AT1G75500 // AT5G08050 // AT1G79700 // AT3G58120 // AT3G48360 // AT3G45640 // AT1G64280 // AT2G16365
GO:0031324	P	negative regulation of cellular metabolic process	8	570	412	28362	0.59	1	// AT3G03710 // AT3G54560 // AT4G27230 // AT3G56400 // AT2G30424 // AT1G13260 // AT5G02810 // AT5G24470
GO:0031323	P	regulation of cellular metabolic process	62	570	2980	28362	0.41	1	// AT5G57660 // AT3G01480 // AT5G21170 // AT3G45640 // AT3G44750 // AT4G27230 // AT3G58120 // AT4G20380 // AT2G23290 // AT4G17460 // AT5G08050 // AT4G13830 // AT3G23050 // AT2G43010 // AT5G24470 // AT1G69040 // AT5G61590 // AT2G16365 // AT1G05805 // AT4G38160 // AT5G02810 // AT3G48360 // AT4G36730 // AT1G25550 // AT3G04730 // AT5G05090 // AT4G23810 // AT5G16470 // AT3G63140 // AT1G68190 // AT1G75…
GO:0090304	P	nucleic acid metabolic process	65	570	3768	28362	0.92	1	// AT5G57660 // AT4G14342 // AT5G08050 // AT3G44750 // AT3G15540 // AT3G58120 // AT2G24590 // AT2G04842 // AT4G17460 // AT3G23050 // AT2G47220 // AT5G24470 // AT5G61590 // AT2G16365 // AT1G05805 // AT4G38160 // AT4G30220 // AT4G24240 // AT2G02570 // AT3G48360 // AT4G27230 // AT2G42040 // AT4G36730 // AT1G25550 // AT3G04730 // AT3G63490 // AT5G05090 // AT4G23810 // AT5G16470 // AT3G01316 // AT3G63…
GO:0071496	P	cellular response to external stimulus	6	570	208	28362	0.25	1	// AT2G27190 // AT3G06850 // AT5G21170 // AT3G03710 // AT3G53900 // AT5G38480
GO:0040007	P	growth	10	570	678	28362	0.87	1	// AT1G75500 // AT3G62910 // AT2G18300 // AT5G19530 // AT5G66210 // AT3G02170 // AT1G21270 // AT5G57490 // AT3G23050 // AT1G35140
GO:0040008	P	regulation of growth	6	570	276	28362	0.48	1	// AT3G62910 // AT2G18300 // AT3G02170 // AT5G57490 // AT3G23050 // AT5G66210
GO:0071554	P	cell wall organization or biogenesis	14	570	704	28362	0.55	1	// AT3G10720 // AT4G03210 // AT5G47500 // AT2G26440 // AT5G44070 // AT1G32170 // AT5G65730 // AT4G30270 // AT1G75500 // AT2G44490 // AT2G15390 // AT4G23820 // AT5G64570 // AT5G57560
GO:0071555	P	cell wall organization	13	570	518	28362	0.25	1	// AT3G10720 // AT4G03210 // AT5G47500 // AT2G26440 // AT5G44070 // AT1G32170 // AT5G65730 // AT4G30270 // AT1G75500 // AT2G44490 // AT2G15390 // AT4G23820 // AT5G57560
GO:0010467	P	gene expression	101	570	4747	28362	0.28	1	// AT5G57660 // AT4G14342 // AT3G44890 // AT5G52520 // AT2G04842 // AT5G08050 // AT2G47220 // AT2G43010 // AT1G05805 // AT4G30220 // AT2G02570 // AT5G47190 // AT4G25890 // AT3G56910 // AT4G23810 // AT2G18328 // AT3G54560 // AT5G08330 // AT2G34620 // AT3G10040 // AT4G36570 // AT1G74270 // AT3G15540 // AT1G79700 // AT3G63490 // AT4G30690 // AT3G56710 // AT4G37260 // AT3G10610 // AT4G39260 // AT3G07…
GO:0009908	P	flower development	7	570	520	28362	0.9	1	// AT5G57660 // AT4G17460 // AT3G54560 // AT3G15540 // AT3G45640 // AT5G52520 // AT1G13260
GO:0010468	P	regulation of gene expression	52	570	2814	28362	0.76	1	// AT5G57660 // AT3G45640 // AT3G44750 // AT4G27230 // AT3G07780 // AT2G23290 // AT4G17460 // AT5G08050 // AT3G23050 // AT2G43010 // AT5G24470 // AT5G61590 // AT2G16365 // AT1G05805 // AT4G38160 // AT4G24240 // AT3G48360 // AT4G38550 // AT4G36730 // AT1G25550 // AT3G04730 // AT5G05090 // AT4G23810 // AT5G16470 // AT3G63140 // AT1G68190 // AT2G18328 // AT3G54560 // AT2G18300 // AT4G01250 // AT1G64…
GO:0044265	P	cellular macromolecule catabolic process	8	570	541	28362	0.85	1	// AT3G03710 // AT4G37610 // AT1G63800 // AT3G48360 // AT4G35350 // AT2G27920 // AT3G16720 // AT5G23210
GO:0016032	P	viral process	5	570	130	28362	0.13	1	// AT3G07780 // AT4G14400 // AT3G04720 // AT2G26560 // AT1G75040
GO:0015031	P	protein transport	8	570	653	28362	0.95	1	// AT3G18890 // AT1G49300 // AT3G48870 // AT3G52400 // AT2G18710 // AT5G54720 // AT5G61210 // AT5G49910
GO:0006970	P	response to osmotic stress	16	570	636	28362	0.22	1	// AT2G42580 // AT1G55450 // AT4G30660 // AT1G62380 // AT5G07440 // AT5G14920 // AT5G57630 // AT4G39260 // AT1G49300 // AT3G48360 // AT3G45640 // AT1G08930 // AT5G18170 // AT3G04720 // AT2G15390 // AT3G09260
GO:0006397	P	mRNA processing	6	570	324	28362	0.63	1	// AT2G24590 // AT4G14342 // AT3G03710 // AT4G39260 // AT4G30220 // AT2G02570
GO:0031409	F	pigment binding	14	570	22	28362	2.9e-15	2.2e-12	// AT1G29930 // AT1G29920 // AT3G08940 // AT2G05070 // AT3G54890 // AT1G29910 // AT1G15820 // AT2G05100 // AT1G61520 // AT2G34420 // AT3G47470 // AT4G10340 // AT2G34430 // AT5G54270
GO:0016168	F	chlorophyll binding	15	570	40	28362	1.3e-13	4.7e-11	// AT1G29930 // AT1G29920 // AT3G08940 // AT2G05070 // AT3G54890 // AT1G29910 // AT1G15820 // AT2G05100 // AT1G61520 // AT2G34420 // AT3G47470 // AT1G30380 // AT4G10340 // AT2G34430 // AT5G54270
GO:0019843	F	rRNA binding	16	570	97	28362	8e-10	2e-07	// AT2G43030 // AT1G35680 // ATCG00660 // ATCG00780 // AT1G48350 // AT3G63140 // AT3G44890 // ATCG00800 // AT4G38160 // AT1G07320 // AT5G47190 // AT2G33800 // AT1G05190 // AT1G32990 // ATCG00770 // AT3G63490
GO:0005488	F	binding	310	570	12081	28362	1.4e-08	2.2e-06	// AT1G29930 // AT1G13110 // AT4G05180 // AT5G57660 // AT5G02160 // AT3G04210 // AT5G49910 // AT1G75690 // AT4G21280 // AT5G02290 // AT3G50950 // AT4G27450 // AT5G67560 // AT3G26180 // AT2G04842 // AT5G19220 // AT3G16530 // AT2G47220 // AT3G63190 // AT3G59350 // AT2G43010 // AT5G28020 // AT1G69040 // AT2G15890 // AT1G05805 // AT2G18710 // AT2G31810 // AT4G30220 // AT1G20020 // AT2G02570 // AT1G21…
GO:0005198	F	structural molecule activity	34	570	538	28362	1.5e-08	2.2e-06	// AT1G64510 // AT3G10610 // ATCG00830 // AT5G19770 // ATCG00660 // AT3G44890 // AT2G43030 // AT3G56020 // AT1G32990 // ATCG01020 // AT1G35680 // AT5G47190 // ATCG01310 // AT4G25890 // AT1G74270 // AT5G46160 // AT3G63490 // AT1G48350 // AT5G65220 // ATCG00800 // AT1G20693 // AT3G27850 // AT1G05190 // AT1G07320 // AT5G19780 // AT3G13120 // ATCG00780 // AT5G55280 // AT3G27160 // ATCG00770 // AT1G20…
GO:0003735	F	structural constituent of ribosome	28	570	391	28362	2.4e-08	3e-06	// AT1G64510 // AT3G10610 // ATCG00830 // ATCG00660 // AT3G44890 // AT2G43030 // AT3G56020 // AT1G32990 // ATCG01020 // AT1G35680 // AT5G47190 // ATCG01310 // AT4G25890 // ATCG00770 // AT5G46160 // AT3G63490 // AT1G48350 // AT5G65220 // ATCG00800 // AT3G27850 // AT1G05190 // AT1G07320 // AT1G74270 // AT3G13120 // ATCG00780 // AT3G27160 // AT5G24490 // AT2G33800
GO:0005515	F	protein binding	115	570	3669	28362	1.2e-06	0.00012	// AT5G02160 // AT5G65350 // AT4G33050 // AT3G23050 // AT3G59350 // AT2G43010 // AT2G15890 // AT1G05805 // AT2G18710 // AT2G28720 // AT1G21120 // AT1G55490 // AT1G75690 // AT4G16950 // AT2G16850 // AT4G04695 // AT4G23810 // AT1G29920 // AT2G41430 // AT3G54560 // AT5G08330 // AT3G10040 // AT3G25070 // AT3G52400 // AT5G14920 // AT3G15540 // AT1G12580 // AT3G46780 // AT1G79790 // AT4G26530 // AT5G64…
GO:0046906	F	tetrapyrrole binding	24	570	402	28362	4.9e-06	0.00046	// AT1G29930 // AT1G13110 // AT1G29910 // AT3G26180 // AT2G05100 // AT2G34420 // AT4G22690 // AT2G34430 // AT1G30380 // AT1G16410 // AT1G29920 // AT1G77490 // AT3G54890 // AT2G05070 // AT1G15820 // AT3G47470 // AT3G08940 // AT4G22710 // AT2G37130 // AT1G71695 // AT1G61520 // AT4G09010 // AT4G10340 // AT5G54270
GO:0046982	F	protein heterodimerization activity	11	570	122	28362	6.8e-05	0.0057	// AT5G65360 // AT2G28720 // AT5G38140 // AT5G65350 // AT5G59970 // AT3G45980 // AT4G27230 // AT3G07780 // AT3G54560 // AT5G22880 // AT2G18160
GO:0043167	F	ion binding	109	570	3821	28362	0.00012	0.0091	// AT1G29930 // AT1G13110 // AT4G05180 // AT5G57660 // AT1G75690 // AT4G21280 // AT1G03400 // AT3G26180 // AT2G04842 // AT3G63190 // AT1G69040 // AT2G31810 // AT4G22010 // ATCG00430 // AT5G63310 // AT4G04695 // AT1G29920 // AT1G14700 // AT1G03090 // AT3G18080 // AT1G77490 // AT2G35500 // AT2G29630 // AT5G66520 // AT1G29910 // AT5G07440 // AT3G07780 // AT5G44070 // AT5G51720 // AT5G18170 // AT3G55…
GO:0016597	F	amino acid binding	6	570	44	28362	0.00043	0.029	// AT1G69040 // AT1G34760 // AT2G31810 // AT3G19480 // AT4G38470 // AT2G39570
GO:0005507	F	copper ion binding	14	570	238	28362	0.00052	0.032	// AT4G33520 // AT1G62380 // AT5G07440 // AT2G14170 // AT3G63190 // AT5G44070 // AT4G22010 // AT5G23250 // AT5G37600 // AT5G18170 // AT3G55010 // AT3G09260 // AT3G58610 // AT3G16420
GO:0016762	F	xyloglucan:xyloglucosyl transferase activity	5	570	33	28362	0.00086	0.039	// AT4G30270 // AT5G57560 // AT4G03210 // AT5G65730 // AT1G32170
GO:0016638	F	oxidoreductase activity, acting on the CH-NH2 group of donors	6	570	50	28362	0.0008	0.039	// AT5G43440 // AT1G62380 // AT5G07440 // AT1G03400 // AT1G32470 // AT5G18170
GO:0005516	F	calmodulin binding	14	570	252	28362	0.00088	0.039	// AT5G66210 // AT2G26190 // AT3G57330 // AT1G13210 // AT1G12580 // AT4G24240 // AT4G37610 // AT3G48360 // AT5G64040 // AT4G33050 // AT4G35310 // AT4G34750 // AT4G31550 // AT4G04695
GO:1901363	F	heterocyclic compound binding	190	570	7718	28362	0.00084	0.039	// AT1G29930 // AT1G13110 // AT3G04210 // AT5G65350 // AT5G02290 // AT3G50950 // AT5G52520 // AT3G26180 // AT2G04842 // AT5G19220 // AT2G47220 // AT3G59350 // AT2G43010 // AT1G05805 // AT4G30220 // AT1G20020 // AT2G02570 // AT5G47190 // AT1G55490 // AT1G48480 // AT5G63310 // AT4G04695 // AT3G06880 // AT4G23810 // AT1G29920 // AT2G18328 // AT5G01810 // AT5G20250 // AT1G20693 // AT1G03090 // AT4G23…
GO:0031406	F	carboxylic acid binding	8	570	91	28362	0.00077	0.039	// AT1G69040 // AT1G34760 // AT1G62380 // AT5G48485 // AT2G31810 // AT3G19480 // AT4G38470 // AT2G39570
GO:0097159	F	organic cyclic compound binding	190	570	7737	28362	0.00095	0.039	// AT1G29930 // AT1G13110 // AT3G04210 // AT5G65350 // AT5G02290 // AT3G50950 // AT5G52520 // AT3G26180 // AT2G04842 // AT5G19220 // AT2G47220 // AT3G59350 // AT2G43010 // AT1G05805 // AT4G30220 // AT1G20020 // AT2G02570 // AT5G47190 // AT1G55490 // AT1G48480 // AT5G63310 // AT4G04695 // AT3G06880 // AT4G23810 // AT1G29920 // AT2G18328 // AT5G01810 // AT5G20250 // AT1G20693 // AT1G03090 // AT4G23…
GO:0043169	F	cation binding	100	570	3678	28362	0.0012	0.048	// AT1G29930 // AT1G13110 // AT4G05180 // AT5G57660 // AT1G75690 // AT4G21280 // AT1G03400 // AT3G26180 // AT2G04842 // AT5G14910 // AT4G22010 // ATCG00430 // AT5G63310 // AT3G09260 // AT1G29920 // AT1G14700 // AT1G03090 // AT3G18080 // AT1G77490 // AT2G35500 // AT2G29630 // AT5G66520 // AT1G29910 // AT5G07440 // AT3G07780 // AT5G44070 // AT5G51720 // AT5G18170 // AT3G55010 // AT3G58610 // AT5G14…
GO:0005509	F	calcium ion binding	14	570	266	28362	0.0014	0.054	// AT4G20780 // AT4G05180 // AT5G66210 // AT4G11850 // AT5G11450 // AT4G21280 // AT2G41100 // AT2G46600 // AT1G06680 // AT1G21270 // AT2G39470 // AT4G35310 // AT4G27280 // AT4G04695
GO:0046872	F	metal ion binding	99	570	3673	28362	0.0017	0.06	// AT1G29930 // AT1G13110 // AT4G05180 // AT5G57660 // AT1G75690 // AT4G21280 // AT1G03400 // AT3G26180 // AT2G04842 // AT5G14910 // AT4G22010 // ATCG00430 // AT5G63310 // AT3G09260 // AT1G29920 // AT1G14700 // AT1G03090 // AT3G18080 // AT1G77490 // AT2G35500 // AT2G29630 // AT5G66520 // AT1G29910 // AT5G07440 // AT3G07780 // AT5G44070 // AT5G51720 // AT5G18170 // AT3G55010 // AT3G58610 // AT5G14…
GO:0043168	F	anion binding	11	570	195	28362	0.0027	0.092	// AT1G69040 // AT1G34760 // AT1G62380 // AT5G28020 // AT2G31810 // AT4G26860 // AT3G19480 // AT5G48485 // AT4G38470 // AT3G48730 // AT2G39570
GO:0016798	F	hydrolase activity, acting on glycosyl bonds	18	570	438	28362	0.0045	0.14	// AT3G57520 // AT4G03210 // AT5G65730 // AT5G64570 // AT3G52840 // AT3G13750 // AT3G18080 // AT5G44680 // AT3G13790 // AT5G20250 // AT4G30270 // AT2G44490 // AT1G32170 // AT4G23820 // AT2G36390 // AT5G57560 // AT3G09260 // AT5G49360
GO:0004553	F	hydrolase activity, hydrolyzing O-glycosyl compounds	17	570	405	28362	0.0046	0.14	// AT3G57520 // AT4G03210 // AT5G65730 // AT5G64570 // AT3G52840 // AT3G13750 // AT3G18080 // AT3G13790 // AT5G20250 // AT4G30270 // AT2G44490 // AT1G32170 // AT4G23820 // AT2G36390 // AT5G57560 // AT3G09260 // AT5G49360
GO:0003993	F	acid phosphatase activity	5	570	54	28362	0.0061	0.17	// AT1G04040 // AT2G39920 // AT2G27190 // AT1G14700 // AT5G44020
GO:0048037	F	cofactor binding	18	570	451	28362	0.0059	0.17	// AT3G45780 // AT3G63140 // AT5G54500 // AT3G21200 // AT5G28020 // AT3G30775 // AT4G26860 // AT5G28840 // AT1G17650 // AT3G19480 // AT5G11670 // AT5G23250 // ATCG00430 // AT4G24230 // AT4G23890 // AT1G76680 // AT3G48730 // AT5G40610
GO:0051082	F	unfolded protein binding	6	570	81	28362	0.0075	0.21	// AT5G02160 // AT5G49910 // AT1G75690 // AT1G55490 // AT3G13470 // AT2G28000
GO:0003755	F	peptidyl-prolyl cis-trans isomerase activity	5	570	58	28362	0.008	0.21	// AT2G43560 // AT1G73655 // AT3G10060 // AT3G01480 // AT3G15520
GO:0016853	F	isomerase activity	12	570	264	28362	0.0091	0.23	// AT1G70820 // AT1G73655 // AT3G01480 // AT5G57655 // AT1G75690 // AT5G66530 // AT3G10060 // AT2G43560 // AT5G28840 // AT3G47800 // AT3G15520 // AT3G48730
GO:0016859	F	cis-trans isomerase activity	5	570	61	28362	0.0097	0.23	// AT2G43560 // AT1G73655 // AT3G10060 // AT3G01480 // AT3G15520
GO:0003727	F	single-stranded RNA binding	5	570	61	28362	0.0097	0.23	// AT1G20020 // AT1G06680 // AT3G63140 // AT4G38160 // AT1G07320
GO:0046983	F	protein dimerization activity	20	570	567	28362	0.013	0.31	// AT5G65360 // AT2G28720 // AT5G38140 // AT3G48870 // AT1G05805 // AT1G21100 // AT5G65350 // AT5G59970 // AT3G45980 // AT4G27230 // AT2G43010 // AT3G07780 // AT1G21130 // AT1G21120 // AT5G40610 // AT5G22880 // AT2G18160 // AT3G54560 // AT2G18300 // AT3G09260
GO:0051287	F	NAD binding	5	570	70	28362	0.016	0.37	// AT5G28840 // AT1G17650 // AT3G19480 // AT5G40610 // AT5G11670
GO:0016491	F	oxidoreductase activity	43	570	1547	28362	0.023	0.5	// AT1G13110 // AT2G19800 // AT5G54500 // AT5G07440 // AT1G03400 // AT2G29290 // AT5G18170 // AT3G58610 // AT1G71695 // AT5G52100 // AT1G62380 // AT1G20020 // AT4G22010 // AT3G19480 // AT2G29310 // ATCG00430 // AT1G32470 // AT1G76680 // AT1G17650 // AT1G16410 // AT3G62930 // AT2G37130 // AT2G14170 // AT1G06830 // AT3G30775 // AT2G25080 // AT5G06690 // AT5G11670 // AT4G23890 // AT4G22710 // AT1G77…
GO:0042625	F	ATPase coupled ion transmembrane transporter activity	5	570	93	28362	0.045	0.93	// AT3G57330 // AT5G44070 // ATCG00480 // AT4G33520 // AT1G13210
GO:0097367	F	carbohydrate derivative binding	67	570	2696	28362	0.044	0.93	// AT4G19530 // AT5G58370 // AT3G04210 // AT5G54500 // AT5G21170 // ATCG00480 // AT5G02290 // AT3G50950 // AT4G19840 // AT1G49300 // AT4G04570 // AT1G13210 // AT1G53440 // AT2G04842 // AT5G19220 // AT3G45640 // AT5G18170 // AT2G28000 // AT3G59350 // AT5G18620 // AT3G14840 // AT5G38480 // AT5G57630 // AT2G07180 // AT5G52520 // AT3G57330 // AT1G55490 // AT5G07440 // AT1G48480 // AT4G35310 // AT1G52…
GO:0098772	F	molecular function regulator	6	570	390	28362	0.79	1	// AT2G26440 // AT5G21170 // AT2G43535 // AT2G38310 // AT5G62360 // AT3G16420
GO:0032549	F	ribonucleoside binding	62	570	2617	28362	0.1	1	// AT4G19530 // AT3G04210 // AT3G57330 // AT5G21170 // ATCG00480 // AT5G02290 // AT3G50950 // AT1G49300 // AT4G04570 // AT1G13210 // AT1G53440 // AT2G04842 // AT5G19220 // AT3G45640 // AT5G18170 // AT2G28000 // AT3G59350 // AT5G18620 // AT3G14840 // AT5G38480 // AT5G57630 // AT2G07180 // AT5G52520 // AT1G55490 // AT5G07440 // AT1G48480 // AT4G35310 // AT1G52290 // AT5G63310 // AT4G01330 // AT4G04…
GO:0001067	F	regulatory region nucleic acid binding	9	570	455	28362	0.57	1	// AT5G61590 // AT1G05805 // AT2G18300 // AT1G79700 // AT2G23290 // AT2G30424 // AT3G58120 // AT4G36730 // AT4G37260
GO:0044212	F	transcription regulatory region DNA binding	9	570	452	28362	0.56	1	// AT5G61590 // AT1G05805 // AT2G18300 // AT1G79700 // AT2G23290 // AT2G30424 // AT3G58120 // AT4G36730 // AT4G37260
GO:0016818	F	hydrolase activity, acting on acid anhydrides, in phosphorus-containing anhydrides	12	570	817	28362	0.89	1	// AT3G48870 // AT4G33520 // AT2G29630 // AT3G57330 // AT1G13210 // ATCG00480 // AT3G10620 // AT5G08650 // AT5G18620 // AT5G44070 // AT5G55280 // AT1G20010
GO:0016684	F	oxidoreductase activity, acting on peroxide as acceptor	6	570	139	28362	0.068	1	// AT1G77490 // AT2G37130 // AT1G71695 // AT2G25080 // AT4G09010 // AT3G01950
GO:0016817	F	hydrolase activity, acting on acid anhydrides	12	570	826	28362	0.9	1	// AT3G48870 // AT4G33520 // AT2G29630 // AT3G57330 // AT1G13210 // ATCG00480 // AT3G10620 // AT5G08650 // AT5G18620 // AT5G44070 // AT5G55280 // AT1G20010
GO:0022804	F	active transmembrane transporter activity	9	570	595	28362	0.84	1	// AT4G33520 // AT1G11260 // AT3G57330 // AT1G13210 // AT2G18710 // AT5G44070 // AT4G24570 // AT1G08930 // ATCG00480
GO:1901265	F	nucleoside phosphate binding	80	570	3370	28362	0.069	1	// AT4G19530 // AT5G19220 // AT1G22330 // AT3G04210 // AT5G54500 // AT5G07440 // ATCG00480 // AT5G02290 // AT3G50950 // AT4G27300 // AT1G49300 // AT4G04570 // AT1G13210 // AT3G48870 // AT1G53440 // AT2G04842 // AT5G23250 // AT3G45640 // AT5G18170 // AT2G28000 // AT3G55010 // AT3G59350 // AT5G18620 // AT3G14840 // AT5G38480 // AT5G57630 // AT2G07180 // AT5G52520 // AT3G57330 // AT1G17650 // AT3G19…
GO:0015399	F	primary active transmembrane transporter activity	6	570	252	28362	0.4	1	// AT4G33520 // AT3G57330 // AT1G13210 // AT2G18710 // AT5G44070 // ATCG00480
GO:0017076	F	purine nucleotide binding	62	570	2633	28362	0.11	1	// AT4G19530 // AT3G04210 // AT3G57330 // AT5G21170 // ATCG00480 // AT5G02290 // AT3G50950 // AT1G49300 // AT4G04570 // AT1G13210 // AT1G53440 // AT2G04842 // AT5G19220 // AT3G45640 // AT5G18170 // AT2G28000 // AT3G59350 // AT5G18620 // AT3G14840 // AT5G38480 // AT5G57630 // AT2G07180 // AT5G52520 // AT1G55490 // AT5G07440 // AT1G48480 // AT4G35310 // AT1G52290 // AT5G63310 // AT4G01330 // AT4G04…
GO:0016787	F	hydrolase activity	63	570	3279	28362	0.67	1	// AT3G57520 // AT3G52110 // AT4G03210 // AT1G79790 // AT1G32170 // AT3G13750 // AT5G08650 // AT3G44750 // AT5G44070 // AT1G13210 // AT1G04280 // AT2G27920 // AT4G22485 // AT2G47220 // AT5G57560 // AT2G26560 // AT5G23210 // AT5G18620 // AT2G27190 // AT4G30270 // AT5G64570 // AT5G49360 // AT5G65730 // AT5G14660 // AT3G57330 // AT1G18440 // AT4G35350 // AT2G45180 // AT1G04040 // AT5G55280 // AT2G36…
GO:0016788	F	hydrolase activity, acting on ester bonds	21	570	1131	28362	0.67	1	// AT2G39920 // AT3G10720 // AT3G52110 // AT2G17230 // AT2G26440 // AT5G47500 // AT1G14700 // AT3G03710 // AT2G27190 // AT2G48030 // AT2G30170 // AT4G11850 // AT5G44020 // AT5G66520 // AT1G04040 // AT1G18440 // AT2G47220 // AT3G04720 // AT2G26560 // AT3G10620 // AT2G39400
GO:0016773	F	phosphotransferase activity, alcohol group as acceptor	21	570	1072	28362	0.58	1	// AT3G45780 // AT1G51805 // AT4G38470 // AT1G52290 // AT3G59350 // AT1G12580 // AT5G02290 // AT5G01810 // AT5G57630 // AT5G66210 // AT4G04570 // AT1G21270 // AT3G45640 // AT5G21170 // AT1G48480 // AT4G35310 // AT1G03740 // AT4G23180 // AT4G01330 // AT4G04695 // AT3G14840
GO:0016772	F	transferase activity, transferring phosphorus-containing groups	33	570	1657	28362	0.55	1	// AT5G21170 // AT5G02290 // AT4G04570 // AT1G53440 // AT5G19220 // AT3G45640 // AT3G59350 // AT3G14840 // AT2G07180 // AT1G48480 // AT4G35310 // AT1G52290 // AT5G63310 // AT4G01330 // AT4G04695 // AT3G45780 // AT1G53430 // AT1G51805 // AT5G01810 // AT5G57630 // AT1G76360 // AT1G03740 // AT5G66210 // AT1G80180 // AT4G23180 // AT1G12580 // AT3G03710 // AT4G27300 // AT1G04280 // AT1G21270 // AT3G53…
GO:0051536	F	iron-sulfur cluster binding	6	570	131	28362	0.054	1	// AT1G06830 // AT2G29630 // AT5G51720 // AT3G62930 // ATCG00430 // AT4G32590
GO:0032559	F	adenyl ribonucleotide binding	55	570	2364	28362	0.15	1	// AT4G19530 // AT3G04210 // AT3G57330 // AT5G07440 // ATCG00480 // AT5G02290 // AT3G50950 // AT4G04570 // AT1G13210 // AT1G53440 // AT2G04842 // AT5G19220 // AT3G45640 // AT5G18170 // AT2G28000 // AT3G59350 // AT3G14840 // AT5G38480 // AT2G07180 // AT5G52520 // AT1G55490 // AT5G21170 // AT1G48480 // AT4G35310 // AT1G52290 // AT5G63310 // AT4G01330 // AT4G04695 // AT5G13630 // AT3G45780 // AT3G48…
GO:0000975	F	regulatory region DNA binding	9	570	455	28362	0.57	1	// AT5G61590 // AT1G05805 // AT2G18300 // AT1G79700 // AT2G23290 // AT2G30424 // AT3G58120 // AT4G36730 // AT4G37260
GO:0032555	F	purine ribonucleotide binding	62	570	2631	28362	0.11	1	// AT4G19530 // AT3G04210 // AT3G57330 // AT5G21170 // ATCG00480 // AT5G02290 // AT3G50950 // AT1G49300 // AT4G04570 // AT1G13210 // AT1G53440 // AT2G04842 // AT5G19220 // AT3G45640 // AT5G18170 // AT2G28000 // AT3G59350 // AT5G18620 // AT3G14840 // AT5G38480 // AT5G57630 // AT2G07180 // AT5G52520 // AT1G55490 // AT5G07440 // AT1G48480 // AT4G35310 // AT1G52290 // AT5G63310 // AT4G01330 // AT4G04…
GO:0032553	F	ribonucleotide binding	65	570	2664	28362	0.063	1	// AT4G19530 // AT3G04210 // AT5G54500 // AT5G21170 // ATCG00480 // AT5G02290 // AT3G50950 // AT1G49300 // AT4G04570 // AT1G13210 // AT1G53440 // AT2G04842 // AT5G19220 // AT3G45640 // AT5G18170 // AT2G28000 // AT3G59350 // AT5G18620 // AT3G14840 // AT5G38480 // AT5G57630 // AT2G07180 // AT5G52520 // AT3G57330 // AT1G55490 // AT5G07440 // AT1G48480 // AT4G35310 // AT1G52290 // AT1G76680 // AT4G01…
GO:0000166	F	nucleotide binding	80	570	3370	28362	0.069	1	// AT4G19530 // AT5G19220 // AT1G22330 // AT3G04210 // AT5G54500 // AT5G07440 // ATCG00480 // AT5G02290 // AT3G50950 // AT4G27300 // AT1G49300 // AT4G04570 // AT1G13210 // AT3G48870 // AT1G53440 // AT2G04842 // AT5G23250 // AT3G45640 // AT5G18170 // AT2G28000 // AT3G55010 // AT3G59350 // AT5G18620 // AT3G14840 // AT5G38480 // AT5G57630 // AT2G07180 // AT5G52520 // AT3G57330 // AT1G17650 // AT3G19…
GO:0043565	F	sequence-specific DNA binding	16	570	825	28362	0.59	1	// AT4G23810 // AT5G61590 // AT2G18160 // AT1G05805 // AT4G37260 // AT1G79700 // AT3G58120 // AT3G56400 // AT2G30424 // AT4G17460 // AT5G03720 // AT4G36730 // AT4G31550 // AT4G01250 // AT4G24240 // AT2G23290
GO:0005506	F	iron ion binding	7	570	317	28362	0.46	1	// AT1G16410 // AT1G13110 // AT2G19800 // AT5G17170 // AT4G22690 // AT3G26180 // AT4G22710
GO:0022891	F	substrate-specific transmembrane transporter activity	15	570	916	28362	0.82	1	// AT4G33520 // AT1G11260 // AT1G52190 // AT3G57330 // AT3G48740 // AT2G18710 // AT5G57490 // AT1G19770 // AT5G44070 // AT1G13210 // AT4G24570 // AT1G08930 // AT1G57990 // AT2G16850 // ATCG00480
GO:0008324	F	cation transmembrane transporter activity	6	570	464	28362	0.9	1	// AT4G33520 // AT1G11260 // AT3G57330 // ATCG00480 // AT5G44070 // AT1G08930
GO:0008289	F	lipid binding	7	570	317	28362	0.46	1	// AT1G22530 // AT4G11850 // AT2G45180 // AT1G12090 // AT4G25940 // AT5G48485 // AT4G24230
GO:0022892	F	substrate-specific transporter activity	16	570	1045	28362	0.89	1	// AT3G48740 // AT4G33520 // AT1G11260 // AT1G52190 // AT3G57330 // AT5G48485 // AT2G18710 // AT5G57490 // AT1G19770 // AT5G44070 // AT1G13210 // AT4G24570 // AT1G08930 // AT1G57990 // AT2G16850 // ATCG00480
GO:0032550	F	purine ribonucleoside binding	62	570	2612	28362	0.1	1	// AT4G19530 // AT3G04210 // AT3G57330 // AT5G21170 // ATCG00480 // AT5G02290 // AT3G50950 // AT1G49300 // AT4G04570 // AT1G13210 // AT1G53440 // AT2G04842 // AT5G19220 // AT3G45640 // AT5G18170 // AT2G28000 // AT3G59350 // AT5G18620 // AT3G14840 // AT5G38480 // AT5G57630 // AT2G07180 // AT5G52520 // AT1G55490 // AT5G07440 // AT1G48480 // AT4G35310 // AT1G52290 // AT5G63310 // AT4G01330 // AT4G04…
GO:0001883	F	purine nucleoside binding	62	570	2612	28362	0.1	1	// AT4G19530 // AT3G04210 // AT3G57330 // AT5G21170 // ATCG00480 // AT5G02290 // AT3G50950 // AT1G49300 // AT4G04570 // AT1G13210 // AT1G53440 // AT2G04842 // AT5G19220 // AT3G45640 // AT5G18170 // AT2G28000 // AT3G59350 // AT5G18620 // AT3G14840 // AT5G38480 // AT5G57630 // AT2G07180 // AT5G52520 // AT1G55490 // AT5G07440 // AT1G48480 // AT4G35310 // AT1G52290 // AT5G63310 // AT4G01330 // AT4G04…
GO:0001882	F	nucleoside binding	62	570	2618	28362	0.1	1	// AT4G19530 // AT3G04210 // AT3G57330 // AT5G21170 // ATCG00480 // AT5G02290 // AT3G50950 // AT1G49300 // AT4G04570 // AT1G13210 // AT1G53440 // AT2G04842 // AT5G19220 // AT3G45640 // AT5G18170 // AT2G28000 // AT3G59350 // AT5G18620 // AT3G14840 // AT5G38480 // AT5G57630 // AT2G07180 // AT5G52520 // AT1G55490 // AT5G07440 // AT1G48480 // AT4G35310 // AT1G52290 // AT5G63310 // AT4G01330 // AT4G04…
GO:0022853	F	active ion transmembrane transporter activity	5	570	100	28362	0.057	1	// AT3G57330 // AT5G44070 // ATCG00480 // AT4G33520 // AT1G13210
GO:0004497	F	monooxygenase activity	6	570	305	28362	0.58	1	// AT1G16410 // AT1G13110 // AT3G56940 // AT4G22690 // AT3G26180 // AT4G22710
GO:0016791	F	phosphatase activity	6	570	327	28362	0.64	1	// AT2G39920 // AT2G27190 // AT1G14700 // AT5G44020 // AT2G30170 // AT1G04040
GO:0016740	F	transferase activity	69	570	3791	28362	0.83	1	// AT2G43910 // AT4G03210 // AT1G52290 // AT5G21170 // AT5G02290 // AT5G23010 // AT2G44500 // AT5G19530 // AT4G04570 // AT1G53440 // AT5G19220 // AT3G45640 // AT5G57560 // AT3G59350 // AT4G37610 // AT3G14840 // AT5G18150 // AT1G55450 // AT1G03150 // AT4G34138 // AT1G21130 // AT1G21100 // AT5G66210 // AT5G65730 // AT5G28020 // AT2G15090 // AT2G07180 // AT1G21120 // AT3G48360 // ATCG01310 // AT1G32…
GO:0016741	F	transferase activity, transferring one-carbon groups	9	570	306	28362	0.17	1	// AT2G43910 // AT1G55450 // AT4G25080 // AT1G21100 // AT1G21130 // AT1G21120 // AT1G15125 // AT3G25470 // AT5G18150
GO:0016746	F	transferase activity, transferring acyl groups	8	570	408	28362	0.58	1	// AT3G06850 // AT5G23010 // AT4G37610 // AT5G44070 // AT2G15090 // AT3G48360 // AT1G03150 // AT2G37500
GO:0016747	F	transferase activity, transferring acyl groups other than amino-acyl groups	6	570	348	28362	0.7	1	// AT3G06850 // AT4G37610 // AT2G15090 // AT3G48360 // AT1G03150 // AT2G37500
GO:0016209	F	antioxidant activity	7	570	181	28362	0.079	1	// AT1G77490 // AT5G06690 // AT2G37130 // AT1G71695 // AT2G25080 // AT4G09010 // AT3G01950
GO:0016757	F	transferase activity, transferring glycosyl groups	12	570	654	28362	0.66	1	// AT2G44500 // AT4G03210 // AT4G34138 // AT5G65730 // AT1G32170 // AT5G20250 // AT4G30270 // AT2G15390 // AT3G53900 // AT2G36390 // AT5G57560 // AT2G37940
GO:0020037	F	heme binding	9	570	360	28362	0.31	1	// AT1G16410 // AT1G77490 // AT1G13110 // AT2G37130 // AT1G71695 // AT4G22690 // AT3G26180 // AT4G09010 // AT4G22710
GO:0051540	F	metal cluster binding	6	570	131	28362	0.054	1	// AT1G06830 // AT2G29630 // AT5G51720 // AT3G62930 // ATCG00430 // AT4G32590
GO:0019001	F	guanyl nucleotide binding	7	570	301	28362	0.4	1	// AT5G08650 // AT1G49300 // AT5G55280 // AT3G53900 // AT5G67560 // AT1G20010 // AT5G58370
GO:0016705	F	oxidoreductase activity, acting on paired donors, with incorporation or reduction of molecular oxygen	6	570	407	28362	0.83	1	// AT1G16410 // AT1G13110 // AT3G56940 // AT4G22690 // AT3G26180 // AT4G22710
GO:0019899	F	enzyme binding	9	570	265	28362	0.094	1	// AT1G22530 // AT1G34760 // AT4G27300 // AT4G37610 // AT3G48360 // AT1G69840 // AT1G63800 // AT3G59350 // AT3G09260
GO:0016709	F	oxidoreductase activity, acting on paired donors, with incorporation or reduction of molecular oxygen, NAD(P)H as one donor, and incorporation of one atom of oxygen	6	570	198	28362	0.22	1	// AT1G16410 // AT1G13110 // AT3G56940 // AT4G22690 // AT3G26180 // AT4G22710
GO:0016874	F	ligase activity	8	570	258	28362	0.16	1	// AT5G16370 // AT3G55010 // AT5G37600 // AT1G03090 // AT2G04842 // AT5G23250 // AT5G52520 // AT5G13630
GO:0003700	F	transcription factor activity, sequence-specific DNA binding	39	570	1729	28362	0.25	1	// AT4G23800 // AT5G57660 // AT5G23420 // AT4G20380 // AT2G23290 // AT4G17460 // AT3G23050 // AT2G43010 // AT5G61590 // AT1G05805 // AT3G48360 // AT4G36730 // AT1G25550 // AT3G04730 // AT5G05090 // AT4G23810 // AT5G16470 // AT1G68190 // AT2G18300 // AT4G01250 // AT1G20693 // AT5G51190 // AT3G56400 // AT2G30424 // AT3G58120 // AT4G31550 // AT5G08330 // AT4G24240 // AT5G38140 // AT3G10040 // AT4G17…
GO:0032561	F	guanyl ribonucleotide binding	7	570	301	28362	0.4	1	// AT5G08650 // AT1G49300 // AT5G55280 // AT3G53900 // AT5G67560 // AT1G20010 // AT5G58370
GO:0005215	F	transporter activity	18	570	1406	28362	0.99	1	// AT3G48740 // AT4G33520 // AT1G11260 // AT1G52190 // AT3G57330 // AT1G75500 // AT2G18710 // AT5G57490 // AT1G19770 // AT5G44070 // AT1G13210 // AT4G24570 // AT1G08930 // AT1G22530 // AT1G57990 // AT2G16850 // AT5G48485 // ATCG00480
GO:0044822	F	poly(A) RNA binding	7	570	337	28362	0.52	1	// AT5G59950 // AT3G45780 // ATCG00830 // AT3G63140 // AT1G01080 // AT4G39260 // AT5G20250
GO:0001071	F	nucleic acid binding transcription factor activity	39	570	1730	28362	0.26	1	// AT4G23800 // AT5G57660 // AT5G23420 // AT4G20380 // AT2G23290 // AT4G17460 // AT3G23050 // AT2G43010 // AT5G61590 // AT1G05805 // AT3G48360 // AT4G36730 // AT1G25550 // AT3G04730 // AT5G05090 // AT4G23810 // AT5G16470 // AT1G68190 // AT2G18300 // AT4G01250 // AT1G20693 // AT5G51190 // AT3G56400 // AT2G30424 // AT3G58120 // AT4G31550 // AT5G08330 // AT4G24240 // AT5G38140 // AT3G10040 // AT4G17…
GO:0016407	F	acetyltransferase activity	5	570	127	28362	0.12	1	// AT4G37610 // AT1G03150 // AT3G06850 // AT2G37500 // AT3G48360
GO:0016887	F	ATPase activity	7	570	530	28362	0.91	1	// AT3G48870 // AT4G33520 // AT3G57330 // AT1G13210 // ATCG00480 // AT5G18620 // AT5G44070
GO:0030246	F	carbohydrate binding	10	570	303	28362	0.093	1	// AT2G02360 // AT5G66530 // AT3G13750 // AT3G15356 // AT4G19840 // AT1G21270 // AT3G47800 // AT3G16530 // AT4G27300 // AT3G16420
GO:0022857	F	transmembrane transporter activity	16	570	1146	28362	0.95	1	// AT3G48740 // AT4G33520 // AT1G11260 // AT1G52190 // AT3G57330 // AT1G75500 // AT2G18710 // AT5G57490 // AT1G19770 // AT5G44070 // AT1G13210 // AT4G24570 // AT1G08930 // AT1G57990 // AT2G16850 // ATCG00480
GO:0004674	F	protein serine/threonine kinase activity	18	570	767	28362	0.29	1	// AT3G45780 // AT4G38470 // AT5G21170 // AT1G12580 // AT5G02290 // AT5G01810 // AT5G57630 // AT5G66210 // AT4G04570 // AT1G21270 // AT3G45640 // AT1G48480 // AT4G35310 // AT1G52290 // AT4G23180 // AT4G01330 // AT4G04695 // AT3G14840
GO:0004672	F	protein kinase activity	21	570	925	28362	0.32	1	// AT3G45780 // AT1G51805 // AT4G38470 // AT1G52290 // AT3G59350 // AT1G12580 // AT5G02290 // AT5G01810 // AT5G57630 // AT5G66210 // AT4G04570 // AT1G21270 // AT3G45640 // AT5G21170 // AT1G48480 // AT4G35310 // AT1G03740 // AT4G23180 // AT4G01330 // AT4G04695 // AT3G14840
GO:0017111	F	nucleoside-triphosphatase activity	10	570	766	28362	0.94	1	// AT3G48870 // AT4G33520 // AT3G57330 // AT1G13210 // ATCG00480 // AT5G18620 // AT5G08650 // AT5G44070 // AT5G55280 // AT1G20010
GO:0043531	F	ADP binding	6	570	157	28362	0.1	1	// AT4G19530 // AT3G04210 // AT4G16990 // AT3G50950 // AT4G16950 // AT4G16860
GO:0016758	F	transferase activity, transferring hexosyl groups	10	570	382	28362	0.25	1	// AT4G03210 // AT4G34138 // AT5G65730 // AT1G32170 // AT5G20250 // AT4G30270 // AT2G15390 // AT2G36390 // AT5G57560 // AT2G37940
GO:0015405	F	P-P-bond-hydrolysis-driven transmembrane transporter activity	6	570	251	28362	0.4	1	// AT4G33520 // AT3G57330 // AT1G13210 // AT2G18710 // AT5G44070 // ATCG00480
GO:0044877	F	macromolecular complex binding	5	570	244	28362	0.55	1	// AT1G20693 // AT4G38550 // AT2G15890 // AT5G18620 // AT3G63190
GO:0003676	F	nucleic acid binding	91	570	4558	28362	0.55	1	// AT5G65350 // AT3G44890 // AT2G47220 // AT2G43010 // AT1G05805 // AT4G30220 // AT2G28720 // AT2G02570 // AT5G47190 // AT4G23810 // AT3G13120 // AT2G18328 // AT3G54560 // AT5G20250 // AT1G20693 // AT5G08330 // AT2G34620 // AT4G36570 // AT5G59970 // AT1G79700 // AT4G30690 // AT4G37260 // AT4G23800 // AT5G23420 // AT1G06680 // AT2G43030 // AT4G36730 // AT1G48350 // AT5G65360 // AT5G66520 // ATCG00…
GO:0003677	F	DNA binding	52	570	2417	28362	0.33	1	// AT5G05090 // AT4G23800 // AT5G23420 // AT5G18620 // AT4G27230 // AT2G23290 // AT4G17460 // AT3G56940 // AT1G12440 // AT3G16000 // AT3G45930 // AT5G24470 // AT5G61590 // AT1G05805 // AT4G38160 // AT4G24240 // AT2G28720 // AT5G65350 // AT4G36730 // AT1G25550 // AT5G65360 // AT4G23810 // AT3G48710 // AT2G18328 // AT3G54560 // AT2G18300 // AT4G01250 // AT1G20693 // AT5G51190 // AT3G56400 // AT2G30…
GO:0042626	F	ATPase activity, coupled to transmembrane movement of substances	5	570	202	28362	0.39	1	// AT3G57330 // AT5G44070 // ATCG00480 // AT4G33520 // AT1G13210
GO:0042623	F	ATPase activity, coupled	6	570	389	28362	0.79	1	// AT4G33520 // AT3G57330 // AT1G13210 // ATCG00480 // AT5G18620 // AT5G44070
GO:0005524	F	ATP binding	53	570	2248	28362	0.13	1	// AT3G57330 // AT5G07440 // ATCG00480 // AT5G02290 // AT3G50950 // AT4G04570 // AT1G13210 // AT1G53440 // AT2G04842 // AT5G19220 // AT3G45640 // AT5G18170 // AT2G28000 // AT3G59350 // AT3G14840 // AT5G38480 // AT2G07180 // AT5G52520 // AT1G55490 // AT5G21170 // AT1G48480 // AT4G35310 // AT1G52290 // AT5G63310 // AT4G01330 // AT4G04695 // AT5G13630 // AT3G45780 // AT3G48870 // AT4G33520 // AT4G16…
GO:0005525	F	GTP binding	7	570	282	28362	0.34	1	// AT5G08650 // AT1G49300 // AT5G55280 // AT3G53900 // AT5G67560 // AT1G20010 // AT5G58370
GO:0016301	F	kinase activity	31	570	1436	28362	0.37	1	// AT5G21170 // AT5G02290 // AT4G04570 // AT1G53440 // AT3G45640 // AT3G59350 // AT3G14840 // AT2G07180 // AT1G48480 // AT4G35310 // AT1G52290 // AT5G63310 // AT4G01330 // AT4G04695 // AT3G45780 // AT1G53430 // AT1G51805 // AT5G01810 // AT5G57630 // AT1G76360 // AT1G03740 // AT5G66210 // AT1G80180 // AT4G23180 // AT1G12580 // AT4G27300 // AT1G04280 // AT1G21270 // AT3G53900 // AT5G35170 // AT4G38…
GO:0004601	F	peroxidase activity	6	570	133	28362	0.058	1	// AT1G77490 // AT2G37130 // AT1G71695 // AT2G25080 // AT4G09010 // AT3G01950
GO:0042578	F	phosphoric ester hydrolase activity	8	570	391	28362	0.53	1	// AT2G39920 // AT2G27190 // AT3G10620 // AT4G11850 // AT1G14700 // AT5G44020 // AT2G30170 // AT1G04040
GO:0008233	F	peptidase activity	6	570	544	28362	0.96	1	// AT2G45180 // AT1G67700 // AT4G35350 // AT2G27920 // AT4G22485 // AT5G23210
GO:0003690	F	double-stranded DNA binding	6	570	315	28362	0.61	1	// AT5G61590 // AT1G05805 // AT4G38160 // AT1G79700 // AT3G58120 // AT2G34620
GO:0042802	F	identical protein binding	6	570	236	28362	0.34	1	// AT3G45780 // AT3G48870 // AT3G09260 // AT3G07780 // AT5G55280 // AT5G40610
GO:0030554	F	adenyl nucleotide binding	55	570	2366	28362	0.15	1	// AT4G19530 // AT3G04210 // AT3G57330 // AT5G07440 // ATCG00480 // AT5G02290 // AT3G50950 // AT4G04570 // AT1G13210 // AT1G53440 // AT2G04842 // AT5G19220 // AT3G45640 // AT5G18170 // AT2G28000 // AT3G59350 // AT3G14840 // AT5G38480 // AT2G07180 // AT5G52520 // AT1G55490 // AT5G21170 // AT1G48480 // AT4G35310 // AT1G52290 // AT5G63310 // AT4G01330 // AT4G04695 // AT5G13630 // AT3G45780 // AT3G48…
GO:0004518	F	nuclease activity	6	570	356	28362	0.72	1	// AT3G52110 // AT3G03710 // AT2G48030 // AT5G66520 // AT2G47220 // AT3G04720
GO:0016651	F	oxidoreductase activity, acting on NAD(P)H	5	570	127	28362	0.12	1	// AT5G54500 // AT1G20020 // AT5G06690 // AT5G11670 // ATCG00430
GO:0008757	F	S-adenosylmethionine-dependent methyltransferase activity	6	570	157	28362	0.1	1	// AT2G43910 // AT4G25080 // AT1G21100 // AT1G21130 // AT1G21120 // AT1G15125
GO:0030234	F	enzyme regulator activity	5	570	356	28362	0.84	1	// AT2G38310 // AT5G21170 // AT3G16420 // AT5G62360 // AT2G26440
GO:0008270	F	zinc ion binding	21	570	1297	28362	0.87	1	// AT3G01500 // AT5G16470 // AT3G06850 // AT5G57660 // AT3G14740 // AT1G68190 // AT5G07440 // ATCG00480 // AT5G22920 // AT1G70410 // AT3G44750 // AT3G48360 // AT3G07780 // AT4G37610 // AT2G24590 // AT5G66520 // AT3G16720 // AT5G18170 // AT1G12440 // AT5G48485 // AT4G17245
GO:0016614	F	oxidoreductase activity, acting on CH-OH group of donors	5	570	214	28362	0.43	1	// AT1G17650 // AT3G19480 // AT5G40610 // AT3G58610 // AT5G11670
GO:0016616	F	oxidoreductase activity, acting on the CH-OH group of donors, NAD or NADP as acceptor	5	570	143	28362	0.17	1	// AT1G17650 // AT3G19480 // AT5G40610 // AT3G58610 // AT5G11670
GO:0000989	F	transcription factor activity, transcription factor binding	5	570	252	28362	0.57	1	// AT4G37610 // AT3G48360 // AT2G23290 // AT2G30424 // AT4G37260
GO:0000988	F	transcription factor activity, protein binding	5	570	259	28362	0.6	1	// AT4G37610 // AT3G48360 // AT2G23290 // AT2G30424 // AT4G37260
GO:0000981	F	RNA polymerase II transcription factor activity, sequence-specific DNA binding	5	570	252	28362	0.57	1	// AT4G37260 // AT2G30424 // AT2G23290 // AT1G05805 // AT1G79700
GO:0015075	F	ion transmembrane transporter activity	10	570	629	28362	0.81	1	// AT4G33520 // AT1G11260 // AT1G52190 // AT3G57330 // AT1G13210 // ATCG00480 // AT5G57490 // AT5G44070 // AT4G24570 // AT1G08930
GO:0016462	F	pyrophosphatase activity	12	570	809	28362	0.89	1	// AT3G48870 // AT4G33520 // AT2G29630 // AT3G57330 // AT1G13210 // ATCG00480 // AT3G10620 // AT5G08650 // AT5G18620 // AT5G44070 // AT5G55280 // AT1G20010
GO:0035639	F	purine ribonucleoside triphosphate binding	60	570	2515	28362	0.098	1	// AT3G57330 // AT5G21170 // ATCG00480 // AT5G02290 // AT3G50950 // AT1G49300 // AT4G04570 // AT1G13210 // AT1G53440 // AT2G04842 // AT5G19220 // AT3G45640 // AT5G18170 // AT2G28000 // AT3G59350 // AT5G18620 // AT3G14840 // AT5G38480 // AT5G57630 // AT2G07180 // AT5G52520 // AT1G55490 // AT5G07440 // AT1G48480 // AT4G35310 // AT1G52290 // AT5G63310 // AT4G01330 // AT4G04695 // AT5G13630 // AT3G45…
GO:0016820	F	hydrolase activity, acting on acid anhydrides, catalyzing transmembrane movement of substances	5	570	205	28362	0.4	1	// AT3G57330 // AT5G44070 // ATCG00480 // AT4G33520 // AT1G13210
GO:0043492	F	ATPase activity, coupled to movement of substances	5	570	203	28362	0.39	1	// AT3G57330 // AT5G44070 // ATCG00480 // AT4G33520 // AT1G13210
GO:0016829	F	lyase activity	8	570	406	28362	0.57	1	// AT3G14930 // AT4G26530 // AT1G70410 // AT3G01500 // AT2G29630 // AT5G11670 // AT5G62980 // AT5G28020
GO:0052689	F	carboxylic ester hydrolase activity	6	570	314	28362	0.6	1	// AT3G10720 // AT2G26440 // AT5G47500 // AT1G18440 // AT2G26560 // AT2G39400
GO:0008168	F	methyltransferase activity	9	570	292	28362	0.14	1	// AT2G43910 // AT1G55450 // AT4G25080 // AT1G21100 // AT1G21130 // AT1G21120 // AT1G15125 // AT3G25470 // AT5G18150
GO:0003723	F	RNA binding	37	570	1943	28362	0.66	1	// ATCG00830 // AT1G22330 // AT5G08650 // AT1G06680 // AT2G43030 // AT2G47220 // AT1G32990 // ATCG00660 // AT3G62910 // AT4G38160 // AT4G30220 // AT1G20020 // AT2G02570 // AT5G47190 // ATCG01310 // AT1G35680 // AT3G25470 // ATCG00770 // AT3G63490 // AT3G45780 // AT3G63140 // AT1G01080 // AT5G66520 // AT3G44890 // ATCG00800 // AT5G20250 // AT2G33800 // AT1G05190 // AT3G43540 // AT5G59950 // AT1G07…
GO:0003729	F	mRNA binding	7	570	337	28362	0.52	1	// AT5G59950 // AT3G45780 // ATCG00830 // AT3G63140 // AT1G01080 // AT4G39260 // AT5G20250
GO:0036094	F	small molecule binding	81	570	3434	28362	0.075	1	// AT4G19530 // AT5G19220 // AT1G22330 // AT3G04210 // AT5G54500 // AT5G07440 // ATCG00480 // AT5G02290 // AT3G50950 // AT4G27300 // AT1G49300 // AT4G04570 // AT1G13210 // AT3G48870 // AT1G53440 // AT2G04842 // AT5G23250 // AT3G45640 // AT5G18170 // AT2G28000 // AT3G55010 // AT3G59350 // AT5G18620 // AT3G14840 // AT1G62380 // AT5G38480 // AT5G57630 // AT2G07180 // AT5G52520 // AT3G57330 // AT1G17…
GO:0004871	F	signal transducer activity	9	570	406	28362	0.43	1	// AT3G45780 // AT5G02290 // AT3G19850 // AT3G05490 // AT3G45640 // AT1G52290 // AT4G38470 // AT5G02810 // AT5G24470
GO:0050662	F	coenzyme binding	8	570	281	28362	0.21	1	// AT3G63140 // AT3G30775 // AT5G40610 // AT5G28840 // AT3G19480 // AT5G11670 // AT4G24230 // AT1G17650
GO:0046914	F	transition metal ion binding	41	570	1912	28362	0.36	1	// AT1G13110 // AT5G57660 // AT2G19800 // AT5G07440 // ATCG00480 // AT3G44750 // AT3G07780 // AT5G44070 // AT3G26180 // AT5G23250 // AT5G18170 // AT3G55010 // AT3G58610 // AT3G16420 // AT3G14740 // AT1G62380 // AT4G17245 // AT3G63190 // AT4G22010 // AT3G48360 // AT5G48485 // AT3G09260 // AT1G16410 // AT5G16470 // AT2G24590 // AT4G33520 // AT1G68190 // AT1G70410 // AT2G14170 // AT5G17170 // AT3G01…
GO:0003824	F	catalytic activity	192	570	9101	28362	0.22	1	// AT1G13110 // AT4G03210 // AT1G75690 // AT5G02290 // AT1G03400 // AT5G19530 // AT3G26180 // AT2G04842 // AT5G19220 // AT2G47220 // AT3G59350 // AT5G52100 // AT5G28020 // AT1G20020 // AT1G21120 // ATCG00430 // AT1G04040 // AT5G63310 // AT4G04695 // AT1G77490 // AT5G47500 // AT4G23180 // AT1G14700 // AT5G01810 // AT3G49680 // AT1G03090 // AT5G06690 // AT3G18080 // AT4G23890 // AT1G03150 // AT1G52…
GO:0044435	C	plastid part	140	570	1455	28362	1.3e-52	8e-50	// AT1G29930 // AT4G05180 // AT5G02160 // AT1G75690 // AT4G21280 // AT3G44890 // AT2G04842 // AT5G19220 // AT5G08050 // AT2G47220 // AT5G14910 // AT2G42220 // AT5G52100 // AT2G18710 // AT1G20020 // AT5G47190 // AT1G76405 // AT1G55490 // ATCG00430 // AT5G63310 // AT1G17650 // AT3G56910 // AT1G29920 // AT2G29180 // AT3G49680 // AT3G18890 // AT1G30380 // AT4G23890 // AT1G77490 // AT2G20260 // AT1G48…
GO:0044434	C	chloroplast part	138	570	1419	28362	2.6e-52	8e-50	// AT1G29930 // AT4G05180 // AT5G02160 // AT1G75690 // AT4G21280 // AT3G44890 // AT2G04842 // AT5G19220 // AT5G08050 // AT2G47220 // AT5G14910 // AT2G42220 // AT5G52100 // AT2G18710 // AT1G20020 // AT5G47190 // AT1G76405 // AT1G55490 // ATCG00430 // AT5G63310 // AT1G17650 // AT3G56910 // AT1G29920 // AT2G29180 // AT3G49680 // AT3G18890 // AT1G30380 // AT4G23890 // AT1G77490 // AT2G20260 // AT1G48…
GO:0009532	C	plastid stroma	101	570	774	28362	5.7e-48	1.2e-45	// AT1G29930 // AT4G05180 // AT1G75690 // AT4G21280 // AT3G44890 // AT2G04842 // AT5G19220 // AT1G80920 // AT2G47220 // AT3G63190 // AT5G52100 // AT1G20020 // AT5G47190 // AT1G55490 // AT5G63310 // AT1G17650 // AT1G29920 // AT3G49680 // AT3G18890 // AT2G20260 // AT3G48730 // AT5G39210 // AT1G16720 // AT3G46780 // AT1G29910 // AT1G06680 // AT5G51720 // AT3G58610 // AT1G32990 // AT2G29630 // AT5G66…
GO:0009579	C	thylakoid	89	570	584	28362	4.9e-47	6.3e-45	// AT1G29930 // AT4G05180 // AT5G02160 // AT1G75690 // AT4G21280 // AT1G33810 // AT5G08050 // AT5G14910 // AT2G42220 // AT4G35770 // AT2G18710 // AT1G20020 // ATCG00430 // AT5G63310 // AT3G56910 // AT1G29920 // AT3G18890 // AT1G30380 // AT4G23890 // AT1G77490 // AT2G20260 // AT1G21500 // ATCG00220 // AT2G29180 // AT3G46780 // AT1G29910 // AT5G64040 // AT1G06680 // AT3G63190 // AT2G39470 // AT2G22…
GO:0009570	C	chloroplast stroma	98	570	740	28362	5.1e-47	6.3e-45	// AT1G29930 // AT4G05180 // AT1G75690 // AT4G21280 // AT3G44890 // AT2G04842 // AT5G19220 // AT1G80920 // AT2G47220 // AT3G63190 // AT5G52100 // AT1G20020 // AT5G47190 // AT1G55490 // AT5G63310 // AT1G17650 // AT1G29920 // AT3G49680 // AT3G18890 // AT2G20260 // AT3G48730 // AT5G39210 // AT1G16720 // AT3G46780 // AT1G29910 // AT1G06680 // AT5G51720 // AT3G58610 // AT1G32990 // AT2G29630 // AT5G66…
GO:0031976	C	plastid thylakoid	81	570	509	28362	5.3e-44	4.6e-42	// AT1G64510 // AT1G29930 // AT1G73655 // AT4G05180 // AT5G02160 // AT4G02770 // AT1G75690 // ATCG00480 // AT1G06680 // AT3G27160 // AT3G15520 // AT3G46780 // AT1G33810 // AT5G08050 // AT1G52230 // AT3G56940 // AT4G28750 // AT3G16000 // AT3G45980 // AT2G34420 // AT2G42220 // AT4G21280 // AT3G08940 // AT3G21200 // AT2G18710 // AT1G29910 // AT3G63140 // AT1G07320 // AT5G14910 // AT1G20020 // AT2G43…
GO:0009534	C	chloroplast thylakoid	81	570	508	28362	4.6e-44	4.6e-42	// AT1G64510 // AT1G29930 // AT1G73655 // AT4G05180 // AT5G02160 // AT4G02770 // AT1G75690 // ATCG00480 // AT1G06680 // AT3G27160 // AT3G15520 // AT3G46780 // AT1G33810 // AT5G08050 // AT1G52230 // AT3G56940 // AT4G28750 // AT3G16000 // AT3G45980 // AT2G34420 // AT2G42220 // AT4G21280 // AT3G08940 // AT3G21200 // AT2G18710 // AT1G29910 // AT3G63140 // AT1G07320 // AT5G14910 // AT1G20020 // AT2G43…
GO:0034357	C	photosynthetic membrane	72	570	422	28362	6.9e-41	5.3e-39	// AT1G64510 // AT1G29930 // AT4G05180 // AT5G02160 // AT4G02770 // AT1G75690 // ATCG00480 // AT1G06680 // AT3G46780 // AT1G33810 // AT5G08050 // AT1G52230 // AT1G51400 // AT4G28750 // AT2G05100 // AT2G34420 // AT2G42220 // AT4G21280 // AT2G18710 // AT1G29910 // AT4G38160 // AT1G49975 // AT5G14910 // AT1G20020 // AT3G16140 // ATCG00430 // AT5G23120 // AT1G72640 // AT5G64040 // AT3G63490 // AT3G56…
GO:0044436	C	thylakoid part	74	570	463	28362	2.7e-40	1.5e-38	// AT1G64510 // AT1G29930 // AT1G73655 // AT4G05180 // AT5G02160 // AT4G02770 // AT1G75690 // ATCG00480 // AT1G06680 // AT1G07320 // AT3G46780 // AT1G33810 // AT5G08050 // AT1G52230 // AT1G51400 // AT4G28750 // AT2G05100 // AT2G34420 // AT2G42220 // AT4G21280 // AT2G18710 // AT1G29910 // AT4G38160 // AT1G49975 // AT5G14910 // AT1G20020 // AT2G43560 // ATCG00430 // AT5G23120 // AT1G72640 // AT5G64…
GO:0055035	C	plastid thylakoid membrane	70	570	401	28362	2.5e-40	1.5e-38	// AT1G64510 // AT1G29930 // AT4G05180 // AT5G02160 // AT4G02770 // AT1G75690 // ATCG00480 // AT1G06680 // AT3G46780 // AT1G33810 // AT5G08050 // AT1G52230 // AT4G28750 // AT2G05100 // AT2G34420 // AT2G42220 // AT4G21280 // AT2G18710 // AT1G29910 // AT1G51400 // AT5G14910 // AT1G20020 // AT3G16140 // ATCG00430 // AT5G23120 // AT1G72640 // AT5G64040 // AT3G63490 // AT3G56910 // AT3G01480 // AT1G29…
GO:0009535	C	chloroplast thylakoid membrane	70	570	400	28362	2.2e-40	1.5e-38	// AT1G64510 // AT1G29930 // AT4G05180 // AT5G02160 // AT4G02770 // AT1G75690 // ATCG00480 // AT1G06680 // AT3G46780 // AT1G33810 // AT5G08050 // AT1G52230 // AT4G28750 // AT2G05100 // AT2G34420 // AT2G42220 // AT4G21280 // AT2G18710 // AT1G29910 // AT1G51400 // AT5G14910 // AT1G20020 // AT3G16140 // ATCG00430 // AT5G23120 // AT1G72640 // AT5G64040 // AT3G63490 // AT3G56910 // AT3G01480 // AT1G29…
GO:0042651	C	thylakoid membrane	71	570	421	28362	5e-40	2.5e-38	// AT1G64510 // AT1G29930 // AT4G05180 // AT5G02160 // AT4G02770 // AT1G75690 // ATCG00480 // AT1G06680 // AT3G46780 // AT1G33810 // AT5G08050 // AT1G52230 // AT1G51400 // AT4G28750 // AT2G05100 // AT2G34420 // AT2G42220 // AT4G21280 // AT2G18710 // AT1G29910 // AT4G38160 // AT5G14910 // AT1G20020 // AT3G16140 // ATCG00430 // AT5G23120 // AT1G72640 // AT5G64040 // AT3G63490 // AT3G56910 // AT3G01…
GO:0009536	C	plastid	213	570	4213	28362	8.7e-39	4.1e-37	// AT1G29930 // AT4G05180 // AT5G02160 // AT1G75690 // AT4G21280 // AT5G02290 // AT3G44890 // AT1G23130 // AT2G04842 // AT5G19220 // AT1G80920 // AT2G47220 // AT5G14910 // AT1G69040 // AT5G52100 // AT4G35770 // AT2G18710 // AT2G31810 // AT1G20020 // AT5G47190 // AT1G76405 // AT1G55490 // ATCG00430 // AT4G13830 // AT2G37080 // AT5G63310 // AT3G09260 // AT3G56910 // AT3G06880 // AT4G23810 // AT1G29…
GO:0009507	C	chloroplast	211	570	4148	28362	1e-38	4.4e-37	// AT1G29930 // AT4G05180 // AT5G02160 // AT1G75690 // AT4G21280 // AT5G02290 // AT3G44890 // AT1G23130 // AT2G04842 // AT5G19220 // AT1G80920 // AT2G47220 // AT5G14910 // AT1G69040 // AT5G52100 // AT4G35770 // AT2G18710 // AT2G31810 // AT1G20020 // AT5G47190 // AT1G76405 // AT1G55490 // ATCG00430 // AT4G13830 // AT2G37080 // AT5G63310 // AT3G09260 // AT3G56910 // AT3G06880 // AT4G23810 // AT1G29…
GO:0031984	C	organelle subcompartment	84	570	817	28362	7.9e-33	3.2e-31	// AT1G64510 // AT1G29930 // AT1G73655 // AT4G05180 // AT5G02160 // AT4G02770 // AT1G75690 // ATCG00480 // AT1G06680 // AT3G27160 // AT1G13210 // AT3G15520 // AT2G15390 // AT1G33810 // AT5G08050 // AT1G52230 // AT3G56940 // AT4G28750 // AT3G16000 // AT3G45980 // AT2G34420 // AT2G42220 // AT4G21280 // AT3G08940 // AT3G21200 // AT2G18710 // AT1G29910 // AT3G63140 // AT1G07320 // AT5G14910 // AT1G20…
GO:0009526	C	plastid envelope	70	570	707	28362	1.8e-26	6.7e-25	// AT1G29930 // ATCG00830 // ATCG00660 // ATCG00770 // ATCG00480 // AT3G44890 // AT4G31530 // AT1G06680 // AT2G43030 // AT3G46780 // AT5G49910 // AT5G19220 // AT4G25080 // AT2G28000 // AT4G28750 // AT2G05100 // AT2G34420 // AT1G32990 // AT1G35680 // AT3G58610 // AT1G29910 // AT3G63140 // AT5G14910 // AT3G54890 // AT5G47190 // AT1G76405 // AT1G55490 // AT5G65220 // AT5G23120 // AT5G63310 // AT3G48…
GO:0009941	C	chloroplast envelope	69	570	688	28362	2.1e-26	7.5e-25	// AT1G29930 // ATCG00830 // ATCG00660 // ATCG00770 // AT3G44890 // AT4G31530 // AT1G06680 // AT2G43030 // AT3G46780 // AT5G49910 // AT5G19220 // AT4G25080 // AT2G28000 // AT4G28750 // AT2G05100 // AT2G34420 // AT1G32990 // AT1G35680 // AT3G58610 // AT1G29910 // AT3G63140 // AT5G14910 // AT3G54890 // AT5G47190 // AT1G76405 // AT1G55490 // AT5G65220 // AT5G23120 // AT5G63310 // AT3G48730 // AT1G48…
GO:0009521	C	photosystem	31	570	96	28362	3.8e-25	1.3e-23	// AT1G29930 // AT4G05180 // AT4G02770 // AT5G64040 // AT1G06680 // AT1G52230 // AT4G28750 // AT2G05100 // AT2G34420 // AT1G29910 // AT1G51400 // AT1G49975 // AT5G23120 // AT4G21280 // AT1G29920 // AT3G54890 // AT1G15820 // AT1G30380 // AT3G47470 // AT3G08940 // AT2G34430 // AT2G05070 // AT2G20260 // AT1G03130 // ATCG00220 // AT5G11450 // AT1G61520 // AT2G39470 // AT3G16140 // AT4G10340 // AT5G54…
GO:0009522	C	photosystem I	23	570	44	28362	9.1e-23	2.9e-21	// AT1G29930 // AT1G29910 // AT5G64040 // AT4G02770 // AT1G52230 // AT4G28750 // AT2G05100 // AT2G34420 // AT1G49975 // AT1G30380 // AT1G29920 // AT3G54890 // AT1G15820 // AT3G47470 // AT3G08940 // AT2G34430 // AT2G05070 // AT2G20260 // AT1G03130 // AT1G61520 // AT3G16140 // AT4G10340 // AT5G54270
GO:0044446	C	intracellular organelle part	193	570	4882	28362	2e-21	6.1e-20	// AT1G29930 // AT5G14120 // AT4G05180 // AT5G02160 // AT1G75690 // AT4G21280 // AT5G57490 // AT3G44890 // AT5G67560 // AT2G04842 // AT5G19220 // AT1G80920 // AT2G47220 // AT5G14910 // AT2G42220 // AT5G52100 // AT2G18710 // AT4G30220 // AT1G20020 // AT5G47190 // AT1G76405 // AT1G55490 // ATCG00430 // AT1G04040 // AT5G63310 // AT3G09260 // AT3G56910 // AT1G29920 // AT3G54560 // AT3G49680 // AT1G20…
GO:0044422	C	organelle part	193	570	4894	28362	2.6e-21	7.6e-20	// AT1G29930 // AT5G14120 // AT4G05180 // AT5G02160 // AT1G75690 // AT4G21280 // AT5G57490 // AT3G44890 // AT5G67560 // AT2G04842 // AT5G19220 // AT1G80920 // AT2G47220 // AT5G14910 // AT2G42220 // AT5G52100 // AT2G18710 // AT4G30220 // AT1G20020 // AT5G47190 // AT1G76405 // AT1G55490 // ATCG00430 // AT1G04040 // AT5G63310 // AT3G09260 // AT3G56910 // AT1G29920 // AT3G54560 // AT3G49680 // AT1G20…
GO:0031975	C	envelope	73	570	1170	28362	7.7e-17	2.1e-15	// AT1G29930 // ATCG00830 // ATCG00660 // ATCG00770 // ATCG00480 // AT5G57490 // AT3G44890 // AT4G31530 // AT1G06680 // AT2G43030 // AT3G46780 // AT5G49910 // AT5G19220 // AT4G25080 // AT2G28000 // AT4G28750 // AT2G05100 // AT2G34420 // AT1G32990 // AT1G35680 // AT3G58610 // AT1G29910 // AT3G63140 // AT5G14910 // AT3G54890 // AT5G47190 // AT1G76405 // AT1G55490 // AT5G65220 // AT5G23120 // AT1G67…
GO:0031967	C	organelle envelope	73	570	1170	28362	7.7e-17	2.1e-15	// AT1G29930 // ATCG00830 // ATCG00660 // ATCG00770 // ATCG00480 // AT5G57490 // AT3G44890 // AT4G31530 // AT1G06680 // AT2G43030 // AT3G46780 // AT5G49910 // AT5G19220 // AT4G25080 // AT2G28000 // AT4G28750 // AT2G05100 // AT2G34420 // AT1G32990 // AT1G35680 // AT3G58610 // AT1G29910 // AT3G63140 // AT5G14910 // AT3G54890 // AT5G47190 // AT1G76405 // AT1G55490 // AT5G65220 // AT5G23120 // AT1G67…
GO:0009523	C	photosystem II	20	570	71	28362	1e-15	2.5e-14	// AT1G29930 // AT1G29920 // AT4G05180 // AT2G05100 // AT3G08940 // AT2G05070 // AT3G54890 // AT4G21280 // AT1G29910 // AT1G15820 // ATCG00220 // AT5G11450 // AT1G06680 // AT1G51400 // AT2G34420 // AT2G39470 // AT5G23120 // AT4G10340 // AT2G34430 // AT5G54270
GO:0044444	C	cytoplasmic part	312	570	10923	28362	6.4e-15	1.6e-13	// AT1G21100 // AT1G29930 // AT5G14120 // AT4G05180 // AT5G02160 // AT1G75690 // AT4G21280 // AT5G02290 // AT3G44890 // AT4G27450 // AT5G52520 // AT1G23130 // AT2G04842 // AT5G19220 // AT1G80920 // AT1G08930 // AT2G47220 // AT5G14910 // AT5G28020 // AT1G69040 // ATCG00660 // AT1G05805 // AT4G35770 // AT2G18710 // AT1G75040 // AT2G31810 // AT4G30220 // AT4G38470 // AT1G20020 // AT5G37600 // AT1G21…
GO:0010287	C	plastoglobule	20	570	80	28362	6.9e-15	1.6e-13	// AT1G29930 // AT1G29920 // AT4G10340 // AT3G63140 // AT2G20260 // AT3G08940 // AT2G05070 // AT3G54890 // ATCG00480 // AT1G29910 // AT1G15820 // AT2G05100 // AT4G02770 // AT1G61520 // AT2G34420 // AT3G47470 // AT1G52230 // AT4G28750 // AT2G34430 // AT5G54270
GO:0005737	C	cytoplasm	357	570	13406	28362	2.1e-13	4.8e-12	// AT5G14120 // AT5G02290 // AT3G44890 // AT4G33050 // AT1G80920 // AT2G47220 // AT2G31810 // AT2G02570 // AT1G76405 // ATCG00430 // AT4G25890 // AT3G06880 // AT3G49680 // AT3G18890 // AT3G12955 // AT3G52400 // AT2G41231 // AT5G66520 // AT3G56710 // AT1G33810 // AT1G07000 // AT5G07440 // AT4G39260 // AT3G07780 // AT3G56020 // AT5G23210 // AT3G63190 // AT3G52840 // AT1G70410 // ATCG00800 // AT5G54…
GO:0030076	C	light-harvesting complex	12	570	25	28362	3.6e-12	7.9e-11	// AT1G29930 // AT1G29920 // AT2G05070 // AT3G54890 // AT1G29910 // AT2G05100 // AT1G61520 // AT2G34420 // AT3G47470 // AT4G10340 // AT2G34430 // AT5G54270
GO:0030312	C	external encapsulating structure	44	570	706	28362	1.6e-10	3.1e-09	// AT5G19770 // AT4G03210 // AT1G32170 // AT3G13750 // AT4G24350 // AT1G71695 // AT4G16563 // AT5G44130 // AT5G23210 // AT5G57560 // AT5G51550 // AT5G64570 // AT3G58610 // AT3G22060 // AT2G27190 // AT1G62380 // AT1G75040 // AT5G49360 // AT4G22010 // AT1G33600 // AT5G38480 // ATCG00480 // AT3G10720 // AT5G65730 // AT5G47500 // AT3G52840 // AT1G04040 // AT3G15356 // AT5G11670 // AT3G18080 // AT3G16…
GO:0005618	C	cell wall	44	570	706	28362	1.6e-10	3.1e-09	// AT5G19770 // AT4G03210 // AT1G32170 // AT3G13750 // AT4G24350 // AT1G71695 // AT4G16563 // AT5G44130 // AT5G23210 // AT5G57560 // AT5G51550 // AT5G64570 // AT3G58610 // AT3G22060 // AT2G27190 // AT1G62380 // AT1G75040 // AT5G49360 // AT4G22010 // AT1G33600 // AT5G38480 // ATCG00480 // AT3G10720 // AT5G65730 // AT5G47500 // AT3G52840 // AT1G04040 // AT3G15356 // AT5G11670 // AT3G18080 // AT3G16…
GO:0098796	C	membrane protein complex	40	570	597	28362	1.5e-10	3.1e-09	// AT1G29930 // AT4G05180 // AT4G02770 // AT5G64040 // AT1G06680 // AT1G52230 // AT4G28750 // AT2G05100 // AT2G34420 // AT4G21280 // AT1G29910 // AT1G51400 // AT1G49975 // AT1G76405 // ATCG00430 // AT5G23120 // ATCG00480 // AT1G29920 // AT3G48870 // AT3G54890 // AT1G15820 // AT1G30380 // AT3G47470 // AT5G57490 // AT4G23890 // AT3G08940 // AT2G34430 // AT2G05070 // AT2G20260 // AT3G52400 // AT1G21…
GO:0032991	C	macromolecular complex	103	570	2658	28362	1.7e-10	3.2e-09	// AT1G29930 // AT4G05180 // AT5G65350 // AT4G21280 // AT3G44890 // AT3G23050 // AT4G30220 // AT2G28720 // AT5G47190 // AT1G76405 // AT1G55490 // ATCG00430 // AT4G25890 // AT3G56910 // AT1G29920 // AT3G54560 // AT1G20693 // AT1G30380 // AT1G03090 // AT3G18080 // AT4G23890 // AT2G20260 // AT3G52400 // AT1G21500 // ATCG00220 // AT5G39210 // AT3G10610 // AT1G07000 // AT1G29910 // AT5G64040 // AT1G06…
GO:0005840	C	ribosome	35	570	499	28362	7.2e-10	1.3e-08	// AT1G64510 // AT3G10610 // ATCG00830 // ATCG00660 // AT3G44890 // AT2G43030 // AT3G56020 // AT2G28000 // AT1G32990 // ATCG01020 // AT1G35680 // AT5G47190 // ATCG01310 // AT4G25890 // AT1G74270 // AT5G46160 // AT3G63490 // AT1G55490 // AT1G48350 // AT5G65220 // ATCG00800 // AT1G03090 // AT3G27850 // AT3G18080 // AT1G05190 // AT1G07320 // ATCG00770 // AT3G13120 // ATCG00780 // AT3G27160 // AT3G13…
GO:0098807	C	chloroplast thylakoid membrane protein complex	11	570	34	28362	8.7e-10	1.6e-08	// AT2G05070 // AT4G21280 // AT4G05180 // ATCG00480 // AT2G05100 // AT1G06680 // AT1G51400 // AT2G39470 // AT5G23120 // AT4G10340 // AT5G64040
GO:0048046	C	apoplast	34	570	486	28362	1.3e-09	2.3e-08	// AT4G05180 // AT5G19770 // AT4G03210 // AT1G32170 // AT3G13750 // AT5G66530 // AT1G06680 // AT5G49910 // AT5G64570 // AT5G57560 // AT5G51550 // AT3G58610 // AT3G05490 // AT1G75040 // AT5G49360 // AT1G20020 // AT1G55490 // AT5G48485 // AT1G35140 // AT2G28000 // AT1G29920 // AT3G63140 // AT5G65730 // AT3G52840 // AT3G01500 // AT3G15356 // AT5G11670 // AT3G16530 // AT1G09750 // AT2G17230 // AT4G39…
GO:0031978	C	plastid thylakoid lumen	14	570	81	28362	5.4e-09	8.6e-08	// AT3G01480 // AT1G73655 // AT4G05180 // AT5G64040 // AT3G10060 // AT5G11450 // AT1G06680 // AT2G43560 // AT1G51400 // AT4G09010 // AT2G39470 // AT3G15520 // AT5G23120 // AT4G21280
GO:0031977	C	thylakoid lumen	15	570	96	28362	5.2e-09	8.6e-08	// AT3G01480 // AT4G21280 // AT4G05180 // ATCG00480 // AT3G10060 // AT5G11450 // AT1G06680 // AT2G43560 // AT1G51400 // AT4G09010 // AT2G39470 // AT3G15520 // AT5G23120 // AT5G64040 // AT1G73655
GO:0009543	C	chloroplast thylakoid lumen	14	570	81	28362	5.4e-09	8.6e-08	// AT3G01480 // AT1G73655 // AT4G05180 // AT5G64040 // AT3G10060 // AT5G11450 // AT1G06680 // AT2G43560 // AT1G51400 // AT4G09010 // AT2G39470 // AT3G15520 // AT5G23120 // AT4G21280
GO:0009547	C	plastid ribosome	10	570	43	28362	7.4e-08	1.2e-06	// ATCG00830 // AT1G07320 // ATCG00660 // AT3G44890 // ATCG00800 // ATCG00780 // ATCG01020 // AT3G27850 // ATCG01310 // ATCG00770
GO:0000311	C	plastid large ribosomal subunit	8	570	23	28362	1.1e-07	1.8e-06	// ATCG00830 // AT1G07320 // ATCG00660 // AT3G44890 // AT3G27850 // ATCG00780 // ATCG01020 // ATCG01310
GO:0000313	C	organellar ribosome	11	570	62	28362	1.9e-07	2.8e-06	// ATCG00830 // AT1G07320 // ATCG00660 // AT3G44890 // ATCG00800 // ATCG00780 // ATCG01020 // AT3G27850 // ATCG01310 // ATCG00770 // AT2G33800
GO:0009505	C	plant-type cell wall	23	570	323	28362	4.8e-07	7e-06	// AT5G44130 // AT3G13750 // AT4G24350 // AT4G16563 // AT5G23210 // AT5G51550 // AT2G27190 // AT5G49360 // AT4G22010 // AT1G33600 // AT1G35140 // AT3G10720 // AT5G47500 // AT3G52840 // AT1G04040 // AT3G18080 // AT3G16530 // AT1G09750 // AT2G26440 // AT4G08950 // AT1G71695 // AT4G30270 // AT5G12950
GO:0009538	C	photosystem I reaction center	6	570	11	28362	5.9e-07	8.3e-06	// AT4G02770 // AT2G20260 // AT1G03130 // AT1G52230 // AT3G16140 // AT4G28750
GO:0000315	C	organellar large ribosomal subunit	8	570	31	28362	7.8e-07	1.1e-05	// ATCG00830 // AT1G07320 // ATCG00660 // AT3G44890 // AT3G27850 // ATCG00780 // ATCG01020 // ATCG01310
GO:1990904	C	ribonucleoprotein complex	40	570	852	28362	1.5e-06	1.9e-05	// AT1G64510 // AT3G10610 // ATCG00830 // ATCG00660 // AT3G44890 // AT2G24590 // AT3G56020 // AT2G28000 // AT1G32990 // ATCG01020 // ATCG01310 // AT4G30220 // AT5G47190 // AT1G55490 // AT1G35680 // AT4G25890 // AT1G74270 // AT5G46160 // AT3G63490 // AT3G56910 // AT3G01316 // AT1G01080 // AT5G65220 // ATCG00800 // AT5G54720 // AT1G03090 // AT3G27850 // AT3G18080 // AT1G05190 // AT1G48350 // AT1G07…
GO:0030529	C	intracellular ribonucleoprotein complex	40	570	852	28362	1.5e-06	1.9e-05	// AT1G64510 // AT3G10610 // ATCG00830 // ATCG00660 // AT3G44890 // AT2G24590 // AT3G56020 // AT2G28000 // AT1G32990 // ATCG01020 // ATCG01310 // AT4G30220 // AT5G47190 // AT1G55490 // AT1G35680 // AT4G25890 // AT1G74270 // AT5G46160 // AT3G63490 // AT3G56910 // AT3G01316 // AT1G01080 // AT5G65220 // ATCG00800 // AT5G54720 // AT1G03090 // AT3G27850 // AT3G18080 // AT1G05190 // AT1G48350 // AT1G07…
GO:0043232	C	intracellular non-membrane-bounded organelle	60	570	1543	28362	1.5e-06	2e-05	// AT1G64510 // AT4G23800 // ATCG00830 // AT5G19770 // ATCG00660 // AT5G65350 // AT3G10610 // AT3G44750 // AT2G43030 // AT3G46780 // AT3G56020 // AT2G28000 // AT1G32990 // AT2G28720 // ATCG01020 // ATCG01310 // AT2G35880 // AT4G27230 // AT4G30220 // AT3G02170 // AT5G47190 // AT1G55490 // AT1G35680 // AT5G55280 // AT4G25890 // AT1G74270 // AT5G46160 // AT3G63490 // AT3G56910 // AT5G65360 // AT2G24…
GO:0043228	C	non-membrane-bounded organelle	60	570	1543	28362	1.5e-06	2e-05	// AT1G64510 // AT4G23800 // ATCG00830 // AT5G19770 // ATCG00660 // AT5G65350 // AT3G10610 // AT3G44750 // AT2G43030 // AT3G46780 // AT3G56020 // AT2G28000 // AT1G32990 // AT2G28720 // ATCG01020 // ATCG01310 // AT2G35880 // AT4G27230 // AT4G30220 // AT3G02170 // AT5G47190 // AT1G55490 // AT1G35680 // AT5G55280 // AT4G25890 // AT1G74270 // AT5G46160 // AT3G63490 // AT3G56910 // AT5G65360 // AT2G24…
GO:0044464	C	cell part	497	570	22662	28362	3.9e-06	4.8e-05	// AT5G14120 // AT5G02290 // AT3G50950 // AT4G24275 // AT1G80920 // AT2G47220 // AT3G59350 // AT2G43010 // AT2G31810 // AT2G02570 // AT1G76405 // ATCG00430 // AT4G25890 // AT3G06880 // AT3G49680 // AT1G20693 // AT3G12955 // AT2G32160 // AT1G80180 // AT3G52400 // AT2G41231 // AT4G37300 // AT5G66520 // AT3G56710 // AT1G33810 // AT4G23800 // AT1G07000 // AT5G07440 // AT4G39260 // AT3G07780 // AT4G04…
GO:0005623	C	cell	497	570	22664	28362	4e-06	4.8e-05	// AT5G14120 // AT5G02290 // AT3G50950 // AT4G24275 // AT1G80920 // AT2G47220 // AT3G59350 // AT2G43010 // AT2G31810 // AT2G02570 // AT1G76405 // ATCG00430 // AT4G25890 // AT3G06880 // AT3G49680 // AT1G20693 // AT3G12955 // AT2G32160 // AT1G80180 // AT3G52400 // AT2G41231 // AT4G37300 // AT5G66520 // AT3G56710 // AT1G33810 // AT4G23800 // AT1G07000 // AT5G07440 // AT4G39260 // AT3G07780 // AT4G04…
GO:0016020	C	membrane	222	570	8532	28362	4.9e-06	5.9e-05	// AT1G29930 // AT5G14120 // AT4G05180 // AT5G02160 // AT3G04210 // AT1G75690 // AT4G21280 // AT5G02290 // AT3G50950 // AT1G07135 // AT4G27450 // AT3G26180 // AT1G33810 // AT5G08050 // AT1G08930 // AT3G59350 // AT2G42220 // AT2G19620 // AT2G18710 // AT1G20020 // AT4G22010 // AT5G47190 // AT1G76405 // AT1G55490 // ATCG00430 // AT1G04040 // AT4G25890 // AT3G09260 // AT3G56910 // AT1G29920 // AT1G77…
GO:0030095	C	chloroplast photosystem II	6	570	19	28362	7.3e-06	8.6e-05	// AT4G05180 // AT4G21280 // AT1G06680 // AT1G51400 // AT2G39470 // AT5G23120
GO:0000786	C	nucleosome	8	570	51	28362	2e-05	0.00023	// AT5G65360 // AT5G65350 // AT3G45980 // AT4G27230 // AT2G28720 // AT3G54560 // AT5G22880 // AT3G46320
GO:0044815	C	DNA packaging complex	8	570	56	28362	3.6e-05	0.00041	// AT5G65360 // AT5G65350 // AT3G45980 // AT4G27230 // AT2G28720 // AT3G54560 // AT5G22880 // AT3G46320
GO:0043229	C	intracellular organelle	417	570	18517	28362	4.1e-05	0.00045	// AT5G14120 // AT5G02290 // AT3G50950 // AT4G24275 // AT1G80920 // AT2G47220 // AT3G59350 // AT2G43010 // AT2G31810 // AT2G02570 // AT1G76405 // ATCG00430 // AT4G25890 // AT3G06880 // AT3G44890 // AT1G20693 // AT3G12955 // AT2G26190 // AT4G01330 // AT2G41231 // AT4G37300 // AT5G66520 // AT3G56710 // AT1G33810 // AT4G23800 // AT1G07000 // AT5G07440 // AT4G39260 // AT3G07780 // AT3G56020 // AT5G23…
GO:0043231	C	intracellular membrane-bounded organelle	411	570	18205	28362	4.2e-05	0.00046	// AT5G14120 // AT5G02290 // AT3G50950 // AT4G24275 // AT1G80920 // AT2G47220 // AT3G59350 // AT2G43010 // AT2G31810 // AT2G02570 // AT1G76405 // ATCG00430 // AT4G25890 // AT3G06880 // AT3G44890 // AT1G20693 // AT3G12955 // AT2G26190 // AT4G01330 // AT2G41231 // AT4G37300 // AT5G66520 // AT3G56710 // AT1G33810 // AT4G23800 // AT1G07000 // AT5G07440 // AT4G39260 // AT3G07780 // AT5G23210 // AT3G63…
GO:0043226	C	organelle	417	570	18527	28362	4.4e-05	0.00047	// AT5G14120 // AT5G02290 // AT3G50950 // AT4G24275 // AT1G80920 // AT2G47220 // AT3G59350 // AT2G43010 // AT2G31810 // AT2G02570 // AT1G76405 // ATCG00430 // AT4G25890 // AT3G06880 // AT3G44890 // AT1G20693 // AT3G12955 // AT2G26190 // AT4G01330 // AT2G41231 // AT4G37300 // AT5G66520 // AT3G56710 // AT1G33810 // AT4G23800 // AT1G07000 // AT5G07440 // AT4G39260 // AT3G07780 // AT3G56020 // AT5G23…
GO:0044424	C	intracellular part	457	570	20693	28362	4.6e-05	0.00048	// AT5G14120 // AT5G02290 // AT3G50950 // AT4G24275 // AT1G80920 // AT2G47220 // AT3G59350 // AT2G43010 // AT2G31810 // AT2G02570 // AT1G76405 // ATCG00430 // AT4G25890 // AT3G06880 // AT3G49680 // AT1G20693 // AT3G12955 // AT2G26190 // AT3G52400 // AT2G41231 // AT4G37300 // AT5G66520 // AT3G56710 // AT1G33810 // AT4G23800 // AT1G07000 // AT5G07440 // AT4G39260 // AT3G07780 // AT3G56020 // AT5G23…
GO:0043227	C	membrane-bounded organelle	411	570	18217	28362	4.6e-05	0.00048	// AT5G14120 // AT5G02290 // AT3G50950 // AT4G24275 // AT1G80920 // AT2G47220 // AT3G59350 // AT2G43010 // AT2G31810 // AT2G02570 // AT1G76405 // ATCG00430 // AT4G25890 // AT3G06880 // AT3G44890 // AT1G20693 // AT3G12955 // AT2G26190 // AT4G01330 // AT2G41231 // AT4G37300 // AT5G66520 // AT3G56710 // AT1G33810 // AT4G23800 // AT1G07000 // AT5G07440 // AT4G39260 // AT3G07780 // AT5G23210 // AT3G63…
GO:0044391	C	ribosomal subunit	19	570	322	28362	5.5e-05	0.00056	// AT3G10610 // ATCG00830 // AT1G07320 // ATCG00660 // ATCG00770 // AT3G44890 // ATCG00800 // ATCG00780 // ATCG01020 // AT3G27850 // ATCG01310 // AT3G27160 // AT3G56020 // AT1G05190 // AT1G32990 // AT1G74270 // AT3G13120 // AT3G63490 // AT2G33800
GO:0005622	C	intracellular	457	570	20721	28362	5.7e-05	0.00057	// AT5G14120 // AT5G02290 // AT3G50950 // AT4G24275 // AT1G80920 // AT2G47220 // AT3G59350 // AT2G43010 // AT2G31810 // AT2G02570 // AT1G76405 // ATCG00430 // AT4G25890 // AT3G06880 // AT3G49680 // AT1G20693 // AT3G12955 // AT2G26190 // AT3G52400 // AT2G41231 // AT4G37300 // AT5G66520 // AT3G56710 // AT1G33810 // AT4G23800 // AT1G07000 // AT5G07440 // AT4G39260 // AT3G07780 // AT3G56020 // AT5G23…
GO:0071944	C	cell periphery	121	570	4309	28362	9e-05	0.00089	// AT4G03210 // AT5G02290 // AT3G50950 // AT1G08930 // AT3G59350 // AT4G22010 // AT1G55490 // AT1G48480 // AT4G25890 // AT4G04695 // AT1G53430 // AT5G47500 // AT5G01810 // AT4G12730 // AT3G10040 // AT3G18080 // AT1G80180 // AT1G09750 // AT3G25070 // AT3G52400 // AT5G14920 // AT4G27300 // AT3G13790 // AT4G30690 // AT1G07000 // AT3G48740 // AT4G14230 // AT4G22830 // AT4G04570 // AT1G13210 // AT5G35…
GO:0043234	C	protein complex	61	570	1834	28362	0.00011	0.0011	// AT1G29930 // AT4G05180 // AT5G19770 // AT1G07000 // AT4G02770 // AT3G45980 // ATCG00480 // AT1G06680 // AT3G46320 // AT1G52230 // AT1G51400 // AT3G23050 // AT4G28750 // AT5G65350 // AT2G05100 // AT2G34420 // AT4G21280 // AT1G29910 // AT4G27230 // AT1G49975 // AT2G28720 // AT3G48360 // AT1G76405 // ATCG00430 // AT5G23120 // AT1G32470 // AT4G37610 // AT5G64040 // AT5G13630 // AT5G65360 // AT1G29…
GO:0015934	C	large ribosomal subunit	13	570	181	28362	0.00013	0.0013	// ATCG00830 // AT1G07320 // ATCG00660 // AT3G44890 // AT3G27850 // ATCG00780 // ATCG01020 // ATCG01310 // AT3G56020 // AT1G05190 // AT1G32990 // AT1G74270 // AT3G63490
GO:0044421	C	extracellular region part	11	570	142	28362	0.00024	0.0022	// AT2G17230 // AT1G07000 // AT3G49780 // AT5G49360 // AT4G08950 // AT4G35350 // AT4G24230 // AT5G64570 // AT5G51550 // AT1G35140 // AT4G16515
GO:0009506	C	plasmodesma	35	570	899	28362	0.00024	0.0022	// AT3G57520 // AT5G19770 // AT3G13750 // AT2G41100 // AT1G69840 // AT5G44130 // AT5G51550 // AT3G16420 // AT5G25250 // AT1G69040 // AT1G11260 // AT1G62380 // AT4G34150 // AT4G27450 // AT3G61260 // AT4G22010 // AT1G48480 // AT3G14840 // AT3G09260 // AT5G48485 // AT5G44020 // AT5G20250 // AT1G04040 // AT5G11670 // AT5G67560 // AT4G22710 // AT5G38480 // AT3G52400 // AT4G39260 // AT3G05490 // AT1G71…
GO:0009654	C	photosystem II oxygen evolving complex	5	570	24	28362	0.00023	0.0022	// AT1G06680 // AT4G21280 // AT4G05180 // AT5G11450 // AT2G39470
GO:0055044	C	symplast	35	570	899	28362	0.00024	0.0022	// AT3G57520 // AT5G19770 // AT3G13750 // AT2G41100 // AT1G69840 // AT5G44130 // AT5G51550 // AT3G16420 // AT5G25250 // AT1G69040 // AT1G11260 // AT1G62380 // AT4G34150 // AT4G27450 // AT3G61260 // AT4G22010 // AT1G48480 // AT3G14840 // AT3G09260 // AT5G48485 // AT5G44020 // AT5G20250 // AT1G04040 // AT5G11670 // AT5G67560 // AT4G22710 // AT5G38480 // AT3G52400 // AT4G39260 // AT3G05490 // AT1G71…
GO:0030054	C	cell junction	35	570	901	28362	0.00025	0.0022	// AT3G57520 // AT5G19770 // AT3G13750 // AT2G41100 // AT1G69840 // AT5G44130 // AT5G51550 // AT3G16420 // AT5G25250 // AT1G69040 // AT1G11260 // AT1G62380 // AT4G34150 // AT4G27450 // AT3G61260 // AT4G22010 // AT1G48480 // AT3G14840 // AT3G09260 // AT5G48485 // AT5G44020 // AT5G20250 // AT1G04040 // AT5G11670 // AT5G67560 // AT4G22710 // AT5G38480 // AT3G52400 // AT4G39260 // AT3G05490 // AT1G71…
GO:0005911	C	cell-cell junction	35	570	901	28362	0.00025	0.0022	// AT3G57520 // AT5G19770 // AT3G13750 // AT2G41100 // AT1G69840 // AT5G44130 // AT5G51550 // AT3G16420 // AT5G25250 // AT1G69040 // AT1G11260 // AT1G62380 // AT4G34150 // AT4G27450 // AT3G61260 // AT4G22010 // AT1G48480 // AT3G14840 // AT3G09260 // AT5G48485 // AT5G44020 // AT5G20250 // AT1G04040 // AT5G11670 // AT5G67560 // AT4G22710 // AT5G38480 // AT3G52400 // AT4G39260 // AT3G05490 // AT1G71…
GO:0000785	C	chromatin	10	570	127	28362	0.0004	0.0034	// AT5G65360 // AT2G28720 // AT5G65350 // AT3G45980 // AT4G27230 // AT1G20693 // AT3G54560 // AT1G67230 // AT3G46320 // AT5G22880
GO:0032993	C	protein-DNA complex	8	570	82	28362	0.00041	0.0035	// AT5G65360 // AT5G65350 // AT3G45980 // AT4G27230 // AT2G28720 // AT3G54560 // AT5G22880 // AT3G46320
GO:0022626	C	cytosolic ribosome	16	570	323	28362	0.0012	0.01	// AT3G10610 // ATCG00830 // AT1G07320 // AT1G32990 // AT3G18080 // AT3G13470 // AT2G28000 // ATCG00800 // AT1G03090 // AT1G55490 // AT3G56020 // AT5G37600 // AT4G25890 // AT1G74270 // AT3G63490 // ATCG01310
GO:0005576	C	extracellular region	83	570	2954	28362	0.0014	0.011	// AT5G19120 // AT3G05490 // AT4G05180 // AT5G19770 // AT1G07000 // AT1G75550 // AT5G54500 // AT1G32170 // AT3G13750 // AT5G66530 // AT1G29920 // AT3G11700 // AT1G06680 // AT4G04570 // AT4G24350 // AT4G20380 // AT5G49910 // AT4G16563 // AT2G27920 // AT4G24230 // AT3G16660 // AT5G23210 // AT5G57560 // AT5G51550 // AT2G33850 // AT5G44572 // AT4G03210 // AT1G71695 // AT2G27190 // AT3G05727 // AT5G64…
GO:0044445	C	cytosolic part	16	570	350	28362	0.0027	0.022	// AT3G10610 // ATCG00830 // AT1G07320 // AT1G32990 // AT3G18080 // AT3G13470 // AT2G28000 // ATCG00800 // AT1G03090 // AT1G55490 // AT3G56020 // AT5G37600 // AT4G25890 // AT1G74270 // AT3G63490 // ATCG01310
GO:0005615	C	extracellular space	7	570	103	28362	0.0062	0.05	// AT2G17230 // AT4G08950 // AT4G16515 // AT4G24230 // AT5G51550 // AT1G35140 // AT4G35350
GO:1990204	C	oxidoreductase complex	8	570	146	28362	0.012	0.092	// AT4G05180 // AT4G21280 // AT5G11450 // AT1G06680 // AT1G32470 // AT2G39470 // ATCG00430 // AT5G40610
GO:0019898	C	extrinsic component of membrane	7	570	125	28362	0.016	0.12	// AT4G05180 // AT3G25070 // AT4G21280 // AT1G21500 // AT1G06680 // AT2G39470 // AT5G11450
GO:0005773	C	vacuole	39	570	1359	28362	0.019	0.15	// AT5G14120 // AT5G54500 // AT5G07440 // AT3G13750 // AT3G11700 // AT1G49300 // AT1G69840 // AT5G23210 // AT3G61260 // AT5G25250 // AT1G71695 // AT1G11260 // AT1G48480 // AT3G01290 // AT3G57330 // AT4G35350 // AT1G75500 // AT4G12730 // AT5G38480 // AT3G09260 // AT3G45780 // AT5G57655 // AT3G52840 // AT1G14700 // AT5G44020 // AT1G04040 // AT5G11670 // AT5G57630 // AT5G67560 // AT2G05070 // AT5G59…
GO:0005886	C	plasma membrane	91	570	3735	28362	0.032	0.24	// AT5G02290 // AT3G50950 // AT1G08930 // AT3G59350 // AT1G55490 // AT1G48480 // AT4G25890 // AT4G04695 // AT1G53430 // AT5G01810 // AT1G33600 // AT1G80180 // AT3G10040 // AT3G25070 // AT3G52400 // AT5G14920 // AT4G27300 // AT3G13790 // AT1G07000 // AT3G48740 // AT4G14230 // AT4G22830 // AT4G04570 // AT1G13210 // AT5G35735 // AT5G40450 // AT3G01290 // AT3G19850 // AT1G15270 // AT4G35310 // AT1G52…
GO:0005694	C	chromosome	12	570	323	28362	0.035	0.26	// AT5G65360 // AT2G28720 // AT4G23800 // AT3G46780 // AT5G65350 // AT3G45980 // AT4G27230 // AT1G20693 // AT3G54560 // AT1G67230 // AT3G46320 // AT5G22880
GO:0044427	C	chromosomal part	10	570	259	28362	0.042	0.31	// AT5G65360 // AT2G28720 // AT5G65350 // AT3G45980 // AT4G27230 // AT1G20693 // AT3G54560 // AT1G67230 // AT3G46320 // AT5G22880
GO:0005829	C	cytosol	51	570	1993	28362	0.049	0.36	// AT3G10610 // ATCG00830 // AT5G19770 // AT1G07000 // AT4G26530 // AT5G57630 // AT2G28000 // AT3G16420 // AT5G44070 // AT3G56020 // AT1G32990 // AT5G40450 // AT1G69040 // AT2G27190 // AT1G05805 // AT1G62380 // AT4G34150 // AT1G21100 // AT4G27450 // AT4G30220 // AT1G21120 // AT1G55490 // AT5G62980 // AT4G35310 // AT2G15890 // AT4G25890 // AT1G74270 // AT4G10100 // AT3G63490 // ATCG01310 // AT2G24…
GO:0022625	C	cytosolic large ribosomal subunit	6	570	134	28362	0.059	0.43	// ATCG00830 // ATCG01310 // AT3G56020 // AT1G32990 // AT1G74270 // AT3G63490
GO:0005774	C	vacuolar membrane	20	570	720	28362	0.098	0.7	// AT5G25250 // AT1G49300 // AT5G14120 // AT1G48480 // AT1G04040 // AT5G54500 // AT5G07440 // AT3G01290 // AT2G41100 // AT5G57630 // AT4G22690 // AT4G12730 // AT1G75500 // AT3G57330 // AT5G57655 // AT2G05070 // AT1G20010 // AT5G67560 // AT1G69840 // AT5G11670
GO:0044437	C	vacuolar part	20	570	725	28362	0.1	0.73	// AT5G25250 // AT1G49300 // AT5G14120 // AT1G48480 // AT1G04040 // AT5G54500 // AT5G07440 // AT3G01290 // AT2G41100 // AT5G57630 // AT4G22690 // AT4G12730 // AT1G75500 // AT3G57330 // AT5G57655 // AT2G05070 // AT1G20010 // AT5G67560 // AT1G69840 // AT5G11670
GO:0031974	C	membrane-enclosed lumen	18	570	1008	28362	0.73	1	// AT5G59950 // AT4G23800 // AT3G06850 // AT3G54560 // AT3G16000 // AT3G45980 // AT4G39260 // AT3G44750 // AT4G27230 // ATCG00780 // AT1G03090 // AT2G24590 // AT1G67230 // AT4G30220 // AT3G13470 // AT5G22880 // AT3G09260 // AT2G33800
GO:0044428	C	nuclear part	15	570	1078	28362	0.95	1	// AT5G59950 // AT5G38140 // AT4G23800 // AT2G24590 // AT3G54560 // AT3G45980 // AT4G39260 // AT3G44750 // AT4G27230 // AT1G67230 // AT4G30220 // AT3G13470 // AT5G22880 // AT3G23050 // AT3G16000
GO:0044425	C	membrane part	118	570	5962	28362	0.59	1	// AT1G29930 // AT5G14120 // AT4G05180 // AT5G02160 // AT3G04210 // AT1G75690 // AT4G21280 // AT5G57490 // AT1G13110 // AT1G07135 // AT3G26180 // AT1G35350 // AT5G08050 // AT1G08930 // AT2G42220 // AT2G19620 // AT2G18710 // AT1G76405 // ATCG00430 // AT1G48480 // AT2G16850 // AT1G29920 // AT5G23120 // AT4G23890 // AT1G77490 // AT2G20260 // AT3G25070 // AT3G52400 // AT2G41231 // AT1G21500 // AT4G27…
GO:0031226	C	intrinsic component of plasma membrane	7	570	292	28362	0.38	1	// AT5G44130 // AT3G57330 // AT3G48740 // AT1G03870 // AT4G12730 // AT2G16850 // AT4G14400
GO:0019866	C	organelle inner membrane	6	570	371	28362	0.76	1	// AT3G48870 // ATCG00480 // AT3G56940 // AT3G18890 // AT4G24570 // AT5G13630
GO:0070013	C	intracellular organelle lumen	18	570	1008	28362	0.73	1	// AT5G59950 // AT4G23800 // AT3G06850 // AT3G54560 // AT3G16000 // AT3G45980 // AT4G39260 // AT3G44750 // AT4G27230 // ATCG00780 // AT1G03090 // AT2G24590 // AT1G67230 // AT4G30220 // AT3G13470 // AT5G22880 // AT3G09260 // AT2G33800
GO:0016021	C	integral component of membrane	88	570	5324	28362	0.98	1	// AT1G29930 // AT5G14120 // AT5G02160 // AT3G04210 // AT1G75690 // AT4G24570 // AT1G13110 // AT3G26180 // AT1G35350 // AT5G08050 // AT1G08930 // AT2G42220 // AT2G19620 // AT2G18710 // AT1G76405 // AT1G48480 // AT2G16850 // AT1G29920 // AT1G77490 // AT3G52400 // AT2G41231 // AT4G27300 // ATCG00220 // AT2G29180 // AT1G29910 // AT3G48740 // AT4G14230 // AT4G22830 // AT4G04570 // AT1G13210 // AT5G35…
GO:1902494	C	catalytic complex	13	570	711	28362	0.67	1	// AT4G05180 // AT4G21280 // AT1G21500 // AT5G11450 // AT1G06680 // AT4G37610 // AT3G48360 // AT1G32470 // AT2G39470 // ATCG00430 // AT3G23050 // AT5G40610 // AT5G13630
GO:0044430	C	cytoskeletal part	7	570	302	28362	0.41	1	// AT5G19770 // AT2G35880 // AT5G19780 // AT3G02170 // AT5G55280 // AT5G67560 // AT1G20010
GO:0044429	C	mitochondrial part	7	570	486	28362	0.86	1	// AT3G06850 // ATCG00480 // AT5G57490 // ATCG00780 // AT1G03090 // AT2G33800 // AT4G24570
GO:0031090	C	organelle membrane	33	570	1760	28362	0.68	1	// AT5G14120 // AT5G54500 // AT5G07440 // ATCG00480 // AT5G57490 // AT1G49300 // AT1G69840 // AT4G25080 // AT5G25250 // AT1G48480 // AT3G01290 // AT5G57630 // AT3G57330 // AT2G15390 // AT1G04040 // AT5G13630 // AT3G48870 // AT4G33520 // AT5G57655 // AT1G75500 // AT3G18890 // AT4G12730 // AT5G11670 // AT4G24570 // AT5G67560 // AT2G05070 // AT3G56940 // AT2G41100 // AT4G27440 // AT4G22690 // AT1G67…
GO:0044459	C	plasma membrane part	10	570	428	28362	0.36	1	// AT5G25250 // AT3G45780 // AT5G44130 // AT3G25070 // AT3G57330 // AT3G48740 // AT1G03870 // AT4G12730 // AT2G16850 // AT4G14400
GO:0005783	C	endoplasmic reticulum	10	570	895	28362	0.99	1	// AT1G16410 // AT1G62380 // AT5G57655 // AT5G48485 // AT2G22170 // AT2G15090 // AT1G08930 // AT4G14400 // AT3G09260 // AT2G39400
GO:0031225	C	anchored component of membrane	7	570	280	28362	0.34	1	// AT1G07135 // AT5G56170 // AT5G44130 // AT5G19240 // AT1G03870 // AT4G12730 // AT3G01950
GO:0005856	C	cytoskeleton	7	570	380	28362	0.64	1	// AT5G19770 // AT2G35880 // AT5G19780 // AT3G02170 // AT5G55280 // AT5G67560 // AT1G20010
GO:0012505	C	endomembrane system	34	570	2143	28362	0.94	1	// AT5G44130 // AT3G57330 // AT2G15390 // AT1G49300 // AT1G13210 // AT1G08930 // AT5G57560 // AT5G25250 // AT4G25940 // AT5G48485 // AT5G38480 // AT4G14400 // AT1G35140 // AT2G39400 // AT1G16410 // AT2G44500 // AT3G49780 // AT4G08950 // AT5G57655 // AT1G66180 // AT2G22170 // AT5G67560 // AT4G22710 // AT1G22530 // AT3G25070 // AT3G52400 // AT1G62380 // AT4G39260 // AT3G09260 // AT4G22690 // AT4G30…
GO:0005730	C	nucleolus	8	570	390	28362	0.53	1	// AT5G59950 // AT2G24590 // AT3G45980 // AT4G39260 // AT4G30220 // AT5G22880 // AT3G44750 // AT3G13470
GO:0031969	C	chloroplast membrane	8	570	259	28362	0.16	1	// AT3G48870 // AT4G25080 // AT3G56940 // AT4G27440 // AT3G18890 // AT1G74470 // AT4G33520 // AT5G13630
GO:0042170	C	plastid membrane	8	570	265	28362	0.17	1	// AT3G48870 // AT4G25080 // AT3G56940 // AT4G27440 // AT3G18890 // AT1G74470 // AT4G33520 // AT5G13630
GO:0098588	C	bounding membrane of organelle	23	570	1213	28362	0.64	1	// AT5G14120 // AT5G54500 // AT5G07440 // AT5G57490 // AT1G49300 // AT1G69840 // AT5G25250 // AT3G01290 // AT3G57330 // AT2G15390 // AT1G48480 // AT5G57655 // AT1G75500 // AT1G04040 // AT5G11670 // AT5G57630 // AT5G67560 // AT2G05070 // AT4G12730 // AT2G41100 // AT4G27440 // AT4G22690 // AT1G20010
GO:0005794	C	Golgi apparatus	22	570	1182	28362	0.67	1	// AT5G44130 // AT3G57330 // AT2G15390 // AT1G49300 // AT5G57560 // AT1G62380 // AT1G66180 // AT5G38480 // AT1G35140 // AT2G39400 // AT2G44500 // AT3G49780 // AT5G57655 // AT1G13210 // AT4G30270 // AT4G22710 // AT1G22530 // AT4G39260 // AT4G08950 // AT4G22690 // AT4G25940 // AT2G37940
GO:0098805	C	whole membrane	23	570	925	28362	0.18	1	// AT5G14120 // AT5G54500 // AT5G07440 // AT5G57630 // AT1G49300 // AT1G69840 // AT5G25250 // AT3G01290 // AT3G57330 // AT1G48480 // AT5G57655 // AT1G75500 // AT1G04040 // AT5G11670 // AT5G57490 // AT5G67560 // AT2G05070 // AT4G12730 // AT2G41100 // AT4G27440 // AT4G22690 // AT4G25940 // AT1G20010
GO:0043233	C	organelle lumen	18	570	1008	28362	0.73	1	// AT5G59950 // AT4G23800 // AT3G06850 // AT3G54560 // AT3G16000 // AT3G45980 // AT4G39260 // AT3G44750 // AT4G27230 // ATCG00780 // AT1G03090 // AT2G24590 // AT1G67230 // AT4G30220 // AT3G13470 // AT5G22880 // AT3G09260 // AT2G33800
GO:0031224	C	intrinsic component of membrane	94	570	5540	28362	0.97	1	// AT1G29930 // AT5G14120 // AT5G02160 // AT3G04210 // AT1G75690 // AT4G24570 // AT1G13110 // AT3G26180 // AT1G35350 // AT5G08050 // AT1G08930 // AT2G42220 // AT2G19620 // AT2G18710 // AT1G76405 // AT1G48480 // AT2G16850 // AT1G29920 // AT1G30380 // AT1G77490 // AT3G52400 // AT2G41231 // AT4G27300 // ATCG00220 // AT2G29180 // AT1G29910 // AT3G48740 // AT4G14230 // AT4G22830 // AT4G04570 // AT1G13…
GO:0005634	C	nucleus	165	570	9924	28362	1	1	// AT5G57660 // AT4G14342 // AT5G65350 // AT3G58120 // AT2G33830 // AT3G50950 // AT5G19530 // AT4G24275 // AT1G33810 // AT1G80920 // AT2G47220 // AT3G59350 // AT1G27020 // AT2G15890 // AT1G05805 // AT4G30220 // AT2G28720 // AT2G02570 // AT1G21120 // AT4G25890 // AT4G04695 // AT4G23810 // AT5G23510 // AT2G18328 // AT3G54560 // AT1G20693 // AT2G42040 // AT5G08330 // AT2G32160 // AT3G10040 // AT2G02…
GO:0015935	C	small ribosomal subunit	5	570	140	28362	0.16	1	// AT3G10610 // ATCG00770 // AT3G13120 // ATCG00800 // AT2G33800
GO:0005739	C	mitochondrion	49	570	3687	28362	1	1	// AT1G29910 // AT5G07440 // ATCG00480 // AT5G57490 // AT3G44890 // AT4G14230 // AT5G13070 // AT5G51720 // AT2G04842 // AT5G23250 // AT5G18170 // AT2G28000 // AT3G55010 // AT3G58610 // ATCG00780 // AT3G01290 // AT5G57760 // AT5G28020 // AT4G38160 // AT5G14660 // AT1G76405 // AT1G55490 // AT3G19480 // AT5G38480 // AT5G46160 // AT5G13630 // AT3G48870 // AT2G14170 // AT3G30775 // AT1G03090 // AT2G33…
GO:0015630	C	microtubule cytoskeleton	5	570	252	28362	0.57	1	// AT5G67560 // AT3G02170 // AT2G35880 // AT5G55280 // AT1G20010
GO:0031981	C	nuclear lumen	13	570	824	28362	0.84	1	// AT5G59950 // AT4G23800 // AT2G24590 // AT3G54560 // AT3G45980 // AT4G39260 // AT3G44750 // AT4G27230 // AT1G67230 // AT4G30220 // AT3G13470 // AT5G22880 // AT3G16000

## Sheet: G2
G2 shoot_control_x_shoot_salt_all_whole_bot_5p_average
GO_acc	term_type	Term	queryitem	querytotal	bgitem	bgtotal	pvalue	FDR	entries
GO:0009415	P	response to water	58	608	355	28362	1.2e-30	3.8e-27	// AT2G38530 // AT1G64660 // AT2G17840 // AT3G50970 // AT3G61890 // AT5G57050 // AT5G59310 // AT2G33380 // AT4G37790 // AT2G39800 // AT1G52400 // AT2G15970 // AT5G25610 // AT3G05640 // AT4G24960 // AT1G56600 // AT5G15960 // AT4G15910 // AT2G37170 // AT2G37180 // AT4G27410 // AT4G02380 // AT1G47128 // AT5G52310 // AT2G05520 // AT1G67360 // AT5G20830 // AT5G26340 // AT2G37760 // AT4G39730 // AT3G45…
GO:0009414	P	response to water deprivation	57	608	347	28362	3.1e-30	4.8e-27	// AT2G38530 // AT1G64660 // AT2G17840 // AT3G50970 // AT3G61890 // AT5G57050 // AT5G59310 // AT2G33380 // AT4G37790 // AT2G39800 // AT1G52400 // AT2G15970 // AT5G25610 // AT3G05640 // AT4G24960 // AT1G56600 // AT5G15960 // AT4G15910 // AT2G37170 // AT2G37180 // AT4G27410 // AT4G02380 // AT1G47128 // AT5G52310 // AT2G05520 // AT1G67360 // AT5G20830 // AT5G26340 // AT2G37760 // AT4G39730 // AT3G45…
GO:0009628	P	response to abiotic stimulus	128	608	2022	28362	1.7e-27	1.7e-24	// AT5G11260 // AT5G24030 // AT1G64660 // AT2G33380 // AT4G37790 // AT3G55610 // AT2G01150 // AT1G21750 // AT1G61340 // AT4G27410 // AT1G51140 // AT4G15910 // AT1G26260 // AT2G03760 // AT2G35940 // AT5G05600 // AT1G67360 // AT5G49480 // AT3G57260 // AT4G39730 // AT5G25610 // AT2G26150 // AT5G57050 // AT2G40970 // AT3G21780 // AT1G20450 // AT2G42540 // AT1G01470 // AT1G54100 // AT3G16800 // AT4G26…
GO:0010035	P	response to inorganic substance	84	608	926	28362	2.5e-27	2e-24	// AT2G38530 // AT2G42540 // AT1G64660 // AT2G17840 // AT3G50970 // AT5G01600 // AT1G11840 // AT3G61890 // AT5G57050 // AT3G09440 // AT2G33380 // AT4G15910 // AT2G39800 // AT1G52400 // AT3G24170 // AT5G06530 // AT3G08590 // AT2G15970 // AT5G25610 // AT1G02205 // AT5G59310 // AT1G21750 // AT3G05640 // AT4G24960 // AT1G56600 // AT5G15960 // AT3G09200 // AT4G35040 // AT2G37170 // AT2G37180 // AT2G37…
GO:1901700	P	response to oxygen-containing compound	107	608	1557	28362	1.8e-25	1e-22	// AT1G64380 // AT5G11260 // AT5G24030 // AT1G64660 // AT2G33380 // AT4G37790 // AT3G55610 // AT4G28140 // AT2G01150 // AT1G61340 // AT3G21780 // AT4G15910 // AT2G03760 // AT2G35940 // AT1G67360 // AT4G39730 // AT5G25610 // AT2G26150 // AT5G57050 // AT4G19700 // AT5G04340 // AT1G20450 // AT2G42540 // AT1G01470 // AT1G54100 // AT3G16800 // AT4G26150 // AT1G28480 // AT2G38530 // AT5G59310 // AT2G17…
GO:0001101	P	response to acid chemical	92	608	1181	28362	2e-25	1e-22	// AT5G11260 // AT5G24030 // AT1G64660 // AT2G33380 // AT4G37790 // AT3G55610 // AT2G01150 // AT1G61340 // AT3G21780 // AT4G15910 // AT2G03760 // AT2G35940 // AT1G67360 // AT4G39730 // AT5G25610 // AT5G57050 // AT4G19700 // AT1G20450 // AT2G42540 // AT1G01470 // AT1G56600 // AT3G16800 // AT4G26150 // AT1G28480 // AT2G38530 // AT5G59310 // AT2G17840 // AT1G72770 // AT1G54100 // AT1G01360 // AT2G39…
GO:0042221	P	response to chemical	150	608	2853	28362	1.7e-24	7.6e-22	// AT1G64380 // AT5G11260 // AT5G24030 // AT1G64660 // AT2G33380 // AT4G37790 // AT3G55610 // AT4G28140 // AT3G08590 // AT2G01150 // AT1G21750 // AT1G61340 // AT2G46690 // AT3G21780 // ATCG00020 // AT4G15910 // AT5G33210 // AT5G06370 // AT2G03760 // AT2G35940 // AT2G29450 // AT5G05600 // AT1G67360 // AT4G36900 // AT4G39730 // AT5G25610 // AT2G26150 // AT5G57050 // AT4G19700 // AT5G04340 // AT1G20…
GO:0009737	P	response to abscisic acid	56	608	578	28362	1.3e-19	5e-17	// AT5G11260 // AT2G17840 // AT3G50970 // AT3G61890 // AT4G23600 // AT1G53300 // AT5G59310 // AT2G33380 // AT1G72770 // AT1G01360 // AT2G39800 // AT3G55610 // AT2G30020 // AT1G52400 // AT2G15970 // AT2G01150 // AT1G61340 // AT4G24960 // AT1G56600 // AT5G52050 // AT5G26340 // AT4G15910 // AT4G27410 // AT4G02380 // AT2G35940 // AT5G52310 // AT2G05520 // AT4G35890 // AT1G35720 // AT4G26080 // AT2G22…
GO:0097305	P	response to alcohol	56	608	583	28362	1.8e-19	6.4e-17	// AT5G11260 // AT2G17840 // AT3G50970 // AT3G61890 // AT4G23600 // AT1G53300 // AT5G59310 // AT2G33380 // AT1G72770 // AT1G01360 // AT2G39800 // AT3G55610 // AT2G30020 // AT1G52400 // AT2G15970 // AT2G01150 // AT1G61340 // AT4G24960 // AT1G56600 // AT5G52050 // AT5G26340 // AT4G15910 // AT4G27410 // AT4G02380 // AT2G35940 // AT5G52310 // AT2G05520 // AT4G35890 // AT1G35720 // AT4G26080 // AT2G22…
GO:0033993	P	response to lipid	61	608	772	28362	2.6e-17	8.2e-15	// AT5G11260 // AT2G17840 // AT3G50970 // AT3G61890 // AT1G29395 // AT1G53300 // AT3G54030 // AT2G33380 // AT1G72770 // AT1G01360 // AT2G39800 // AT3G55610 // AT2G30020 // AT1G52400 // AT2G15970 // AT2G01150 // AT1G61340 // AT4G24960 // AT1G56600 // AT3G21780 // AT5G26340 // AT4G15910 // AT5G52050 // AT1G69530 // AT4G02380 // AT2G35940 // AT5G52310 // AT5G15960 // AT2G05520 // AT4G23600 // AT4G35…
GO:0050896	P	response to stimulus	225	608	6250	28362	9.6e-17	2.7e-14	// AT1G64380 // AT5G11260 // AT5G24030 // AT1G64660 // AT2G33380 // AT3G16800 // AT4G11600 // AT3G55610 // AT3G23920 // AT4G28140 // AT3G08590 // AT2G01150 // AT1G21750 // AT1G61340 // AT4G27410 // AT2G46690 // AT3G21780 // AT1G51140 // ATCG00020 // AT4G15910 // AT5G33210 // AT1G26260 // AT5G06370 // AT2G03760 // AT2G35940 // AT2G29450 // AT4G08870 // AT1G67360 // AT5G20830 // AT5G22290 // AT4G36…
GO:0006970	P	response to osmotic stress	52	608	636	28362	1.9e-15	4.9e-13	// AT2G37760 // AT5G59310 // AT2G17840 // AT5G59820 // AT5G57050 // AT2G33380 // AT5G24660 // AT2G39800 // AT3G55610 // AT1G52400 // AT2G01150 // AT2G37180 // AT1G61340 // AT4G24960 // AT1G03220 // AT1G35720 // AT1G16850 // AT5G15960 // AT3G09200 // AT1G16920 // AT3G61890 // AT3G51960 // AT2G03760 // AT4G23670 // AT5G20830 // AT1G21750 // AT5G26340 // AT5G24770 // AT5G37260 // AT5G49480 // AT4G39…
GO:0006950	P	response to stress	147	608	3506	28362	2.3e-15	5.5e-13	// AT1G64660 // AT5G53120 // AT2G33380 // AT4G37790 // AT3G55610 // AT2G01150 // AT1G21750 // AT1G61340 // AT3G21780 // ATCG00020 // AT4G15910 // AT2G03760 // AT1G42990 // AT1G67360 // AT5G49480 // AT3G57260 // AT4G39730 // AT5G25610 // AT3G47640 // AT3G23820 // AT5G57050 // AT3G01520 // AT2G40970 // AT4G19700 // AT1G51090 // AT1G20450 // AT2G42540 // AT1G01470 // AT1G54100 // AT3G16800 // AT1G79…
GO:0009719	P	response to endogenous stimulus	90	608	1732	28362	3.1e-14	6.8e-12	// AT1G64380 // AT5G11260 // AT2G33380 // AT4G37790 // AT3G55610 // AT4G28140 // AT2G01150 // AT1G21750 // AT1G61340 // AT2G46690 // AT3G21780 // AT4G15910 // AT5G33210 // AT2G35940 // AT4G36900 // AT5G25610 // AT2G26150 // AT5G57050 // AT4G19700 // AT5G04340 // AT1G20450 // AT2G42540 // AT1G56600 // AT5G60360 // AT4G26150 // AT1G28480 // AT3G49120 // AT2G17840 // AT1G72770 // AT1G01360 // AT2G39…
GO:0009725	P	response to hormone	86	608	1631	28362	5.8e-14	1.2e-11	// AT1G64380 // AT5G11260 // AT2G33380 // AT4G37790 // AT3G55610 // AT4G28140 // AT5G13370 // AT1G21750 // AT1G61340 // AT2G46690 // AT3G21780 // AT4G15910 // AT5G33210 // AT2G35940 // AT4G36900 // AT5G25610 // AT5G57050 // AT4G19700 // AT1G20450 // AT2G42540 // AT1G56600 // AT5G60360 // AT4G26150 // AT1G28480 // AT3G49120 // AT2G17840 // AT1G72770 // AT1G01360 // AT2G39800 // AT1G52400 // AT2G15…
GO:0009651	P	response to salt stress	46	608	574	28362	1.6e-13	3.2e-11	// AT2G37760 // AT5G59310 // AT2G17840 // AT5G59820 // AT1G53300 // AT2G33380 // AT5G24660 // AT2G39800 // AT3G55610 // AT1G52400 // AT1G21750 // AT1G61340 // AT4G24960 // AT1G03220 // AT1G35720 // AT1G16850 // AT3G09200 // AT1G16920 // AT3G61890 // AT3G51960 // AT2G03760 // AT4G23670 // AT5G26340 // AT5G24770 // AT5G37260 // AT5G49480 // AT4G39730 // AT5G25610 // AT5G24030 // AT5G27150 // AT5G15…
GO:0009266	P	response to temperature stimulus	45	608	559	28362	2.6e-13	4.7e-11	// AT1G07720 // AT2G17840 // AT5G59820 // AT5G20830 // AT3G09440 // AT2G33380 // AT3G50970 // AT1G12060 // AT2G15970 // AT2G43130 // AT4G24960 // AT2G33590 // AT5G15960 // AT3G08730 // AT4G02380 // AT5G52310 // AT5G52640 // AT1G07400 // AT1G35720 // AT4G26080 // AT3G09200 // AT2G37760 // AT3G22330 // AT3G57260 // AT4G39730 // AT3G22370 // AT2G26150 // AT5G57050 // AT2G42540 // AT2G40970 // AT1G20…
GO:0010033	P	response to organic substance	97	608	2023	28362	2.7e-13	4.7e-11	// AT1G64380 // AT5G11260 // AT2G33380 // AT4G37790 // AT3G55610 // AT4G28140 // AT2G01150 // AT1G21750 // AT1G61340 // AT2G46690 // AT3G21780 // AT4G15910 // AT5G33210 // AT2G03760 // AT2G35940 // AT4G36900 // AT5G25610 // AT2G26150 // AT5G57050 // AT4G19700 // AT5G04340 // AT1G20450 // AT2G42540 // AT1G56600 // AT5G60360 // AT4G26150 // AT2G05520 // AT1G28480 // AT3G49120 // AT2G17840 // AT1G72…
GO:0009409	P	response to cold	33	608	384	28362	9e-11	1.5e-08	// AT1G07720 // AT2G17840 // AT3G08730 // AT5G20830 // AT2G33380 // AT3G50970 // AT2G15970 // AT4G24960 // AT1G35720 // AT5G15960 // AT5G59820 // AT4G02380 // AT5G52310 // AT4G26080 // AT3G09200 // AT2G37760 // AT3G22330 // AT3G57260 // AT4G39730 // AT3G22370 // AT2G40970 // AT1G20450 // AT2G42540 // AT5G66400 // AT5G15970 // AT1G29395 // AT4G04020 // AT1G56600 // AT3G11410 // AT5G01600 // AT4G34…
GO:0009269	P	response to desiccation	9	608	24	28362	1.8e-08	2.9e-06	// AT5G25610 // AT1G54100 // AT1G01470 // AT2G33380 // AT2G37180 // AT2G39800 // AT2G21620 // AT5G52310 // AT2G05520
GO:0044699	P	single-organism process	267	608	9448	28362	4.9e-08	7.3e-06	// AT1G64380 // AT5G11260 // AT2G39020 // AT5G24030 // AT3G55500 // AT2G33380 // AT4G37790 // AT2G25450 // AT4G11600 // AT3G55610 // AT3G10870 // AT3G08610 // AT4G30190 // AT4G28140 // AT4G04210 // AT2G01150 // AT1G21750 // AT4G04610 // AT2G27230 // AT2G46690 // AT3G21780 // AT1G51140 // ATCG00020 // AT4G15910 // AT5G59570 // AT5G33210 // AT1G26260 // AT5G55290 // AT1G67300 // AT5G52320 // AT2G12…
GO:0042538	P	hyperosmotic salinity response	11	608	63	28362	4e-07	5.7e-05	// AT4G24960 // AT5G24770 // AT5G49480 // AT4G23600 // AT1G16920 // AT5G59820 // AT2G39800 // AT3G55610 // AT3G51960 // AT4G30650 // AT5G52310
GO:0006082	P	organic acid metabolic process	51	608	1099	28362	4.9e-07	6.7e-05	// AT1G07720 // AT3G28480 // AT1G64660 // AT5G28030 // AT1G62180 // AT1G11840 // AT5G36160 // AT2G33380 // AT2G25450 // AT2G39800 // AT3G55610 // AT3G10870 // AT1G52400 // AT1G17745 // AT3G08590 // AT1G20560 // AT3G23810 // AT2G39020 // AT4G04610 // AT4G33150 // AT2G04350 // AT1G56430 // AT2G36580 // AT2G46505 // ATCG00250 // AT1G68570 // AT2G43820 // AT5G38530 // AT1G05560 // AT5G48180 // AT1G06…
GO:0006972	P	hyperosmotic response	11	608	75	28362	1.9e-06	0.00023	// AT4G24960 // AT5G24770 // AT5G49480 // AT4G23600 // AT1G16920 // AT5G59820 // AT2G39800 // AT3G55610 // AT3G51960 // AT4G30650 // AT5G52310
GO:0045454	P	cell redox homeostasis	15	608	147	28362	1.8e-06	0.00023	// AT3G54960 // AT1G21750 // AT3G24170 // AT1G62180 // AT1G08570 // AT2G18990 // AT5G66410 // AT2G30540 // AT1G64500 // AT4G04610 // AT4G15680 // AT1G65980 // AT1G53300 // AT4G21990 // AT1G28480
GO:0080167	P	response to karrikin	14	608	128	28362	1.9e-06	0.00023	// AT5G05600 // AT5G11260 // AT2G40080 // AT4G33150 // AT5G02270 // AT2G16660 // AT3G09440 // AT2G47930 // AT3G21560 // AT1G61890 // AT2G01150 // AT4G34710 // AT1G30530 // AT2G23910
GO:0019725	P	cellular homeostasis	22	608	314	28362	3e-06	0.00035	// AT2G18990 // AT1G65980 // AT3G24170 // AT1G62180 // AT5G24030 // AT4G15680 // AT4G16370 // AT3G54960 // AT1G21750 // AT5G66410 // AT2G30540 // AT5G47560 // AT1G64500 // AT4G04610 // AT1G53300 // AT5G27150 // AT1G08570 // AT1G45249 // AT5G01600 // AT1G66240 // AT4G21990 // AT1G28480
GO:1901605	P	alpha-amino acid metabolic process	19	608	242	28362	3.1e-06	0.00035	// AT4G08870 // AT3G28480 // AT1G64660 // AT1G62180 // AT5G55070 // AT5G14800 // AT5G36160 // AT5G28030 // AT1G06570 // AT4G04610 // AT4G33150 // AT2G39800 // AT3G55610 // AT4G34710 // ATCG00250 // AT4G21990 // AT1G17745 // AT3G23810 // AT5G38530
GO:0010038	P	response to metal ion	28	608	481	28362	4.3e-06	0.00047	// AT1G65980 // AT1G11840 // AT5G20830 // AT3G09440 // AT3G08590 // AT1G19570 // AT1G21750 // AT2G33590 // AT4G35040 // AT2G37760 // AT5G06370 // AT2G32520 // AT5G13740 // AT4G23670 // AT2G05520 // AT1G52827 // AT5G14780 // AT3G09200 // AT5G24770 // AT5G15650 // AT3G15352 // AT4G16760 // AT5G51830 // AT3G12580 // AT1G35720 // AT1G60710 // AT5G01600 // AT4G11600
GO:0044710	P	single-organism metabolic process	126	608	3970	28362	4.9e-06	0.00051	// AT5G11260 // AT2G39020 // AT1G64660 // AT2G33380 // AT2G25450 // AT3G55610 // AT3G10870 // AT3G08610 // AT4G30190 // AT3G08590 // AT3G23810 // AT4G04610 // ATCG00020 // AT3G03470 // AT2G12190 // AT2G03760 // AT5G62220 // AT3G04240 // AT3G20810 // AT5G05600 // AT1G77810 // AT2G41730 // AT5G62670 // AT1G02660 // AT3G23820 // AT5G57050 // AT3G21780 // AT1G64950 // AT1G54100 // AT1G13280 // AT4G26…
GO:0042592	P	homeostatic process	30	608	542	28362	5.1e-06	0.00052	// AT2G18990 // AT1G65980 // AT3G24170 // AT1G62180 // AT1G53300 // AT4G15680 // AT1G52400 // AT4G16370 // AT3G54960 // AT1G21750 // AT5G13740 // AT2G41240 // AT4G17550 // AT5G66410 // AT2G30540 // AT5G47560 // AT1G64500 // AT4G04610 // AT3G47640 // AT5G24030 // AT5G27150 // AT1G68570 // AT5G04340 // AT1G08570 // AT5G28030 // AT1G45249 // AT5G01600 // AT1G66240 // AT4G21990 // AT1G28480
GO:0044281	P	small molecule metabolic process	62	608	1597	28362	8.4e-06	0.00082	// AT2G18990 // AT1G07720 // AT1G64660 // AT5G28030 // AT1G62180 // AT1G11840 // AT5G55070 // AT5G36160 // AT4G16760 // AT2G33380 // AT2G25450 // AT3G17940 // AT3G55610 // AT3G10870 // AT1G52400 // AT4G30190 // AT1G17745 // AT3G08590 // AT1G20560 // AT3G23810 // AT2G39020 // AT4G04610 // AT4G33150 // AT2G04350 // AT1G56430 // AT2G36580 // AT2G46505 // AT5G13930 // ATCG00250 // AT1G68570 // AT2G43…
GO:0009611	P	response to wounding	17	608	217	28362	1e-05	0.00099	// AT4G22880 // AT1G61340 // AT2G30020 // AT5G14780 // AT4G24220 // AT5G24770 // AT1G01470 // AT5G50200 // AT4G23600 // AT3G45140 // AT5G59820 // AT1G71697 // AT5G52310 // AT5G13930 // AT4G34710 // AT4G16760 // AT1G66760
GO:0009631	P	cold acclimation	8	608	46	28362	1.6e-05	0.0014	// AT1G20450 // AT3G50970 // AT2G42540 // AT5G66400 // AT5G15960 // AT1G29395 // AT5G59820 // AT2G15970
GO:0044763	P	single-organism cellular process	187	608	6591	28362	1.6e-05	0.0014	// AT1G64380 // AT5G11260 // AT2G39020 // AT5G24030 // AT3G55500 // AT2G33380 // AT3G16800 // AT2G25450 // AT3G55610 // AT3G10870 // AT4G30190 // AT4G28140 // AT4G04210 // AT2G01150 // AT1G21750 // AT4G04610 // AT2G46690 // AT3G21780 // AT1G51140 // ATCG00020 // AT5G33210 // AT5G01600 // AT5G62220 // AT3G04240 // AT2G35940 // AT3G20810 // AT5G08290 // AT2G29450 // AT4G30600 // AT1G42990 // AT5G20…
GO:0009738	P	abscisic acid-activated signaling pathway	17	608	243	28362	4e-05	0.0035	// AT5G11260 // AT4G26080 // AT2G46680 // AT1G52400 // AT4G35890 // AT1G72770 // AT1G45249 // AT1G53300 // AT1G01360 // AT3G11410 // AT2G30020 // AT5G57050 // AT1G07430 // AT4G37790 // AT4G11890 // AT2G01150 // AT1G69260
GO:0009408	P	response to heat	15	608	199	28362	5.1e-05	0.0043	// AT1G07400 // AT2G43130 // AT1G35720 // AT3G12580 // AT4G26080 // AT2G33590 // AT5G59820 // AT5G14800 // AT5G51440 // AT3G09440 // AT2G26150 // AT5G05410 // AT5G52640 // AT5G57050 // AT2G42540
GO:0043436	P	oxoacid metabolic process	41	608	973	28362	5.6e-05	0.0046	// AT1G07720 // AT1G64660 // AT5G28030 // AT2G39020 // AT1G11840 // AT5G36160 // AT2G33380 // AT2G25450 // AT2G39800 // AT3G55610 // AT1G52400 // AT1G17745 // AT3G08590 // AT1G20560 // AT4G33150 // AT2G04350 // AT1G56430 // AT2G36580 // ATCG00250 // AT1G68570 // AT2G43820 // AT1G05560 // AT5G48180 // AT5G55070 // AT1G73680 // AT3G45140 // AT3G23820 // AT3G44310 // AT4G16760 // AT3G21780 // AT5G51…
GO:0007623	P	circadian rhythm	12	608	134	28362	6.3e-05	0.005	// AT5G11260 // AT2G17840 // AT2G42540 // AT5G37260 // AT3G14620 // AT5G15840 // AT2G40080 // AT5G59570 // AT4G26150 // AT3G20810 // AT5G52310 // AT3G06500
GO:0009605	P	response to external stimulus	58	608	1582	28362	7.7e-05	0.006	// AT5G11260 // AT3G50970 // AT3G61890 // AT1G29395 // AT4G16760 // AT1G64660 // AT2G33380 // AT5G24660 // AT5G52310 // AT1G12060 // AT2G30020 // AT1G52400 // AT1G04770 // AT4G21610 // AT2G15970 // AT1G19570 // AT3G17810 // AT1G61340 // AT2G40080 // AT1G58360 // AT1G27950 // AT1G51090 // AT5G52450 // AT1G52410 // AT4G23670 // AT5G13740 // AT4G02380 // AT1G19670 // AT2G35940 // AT2G41240 // AT3G29…
GO:1901419	P	regulation of response to alcohol	9	608	78	28362	8.9e-05	0.0066	// AT5G11260 // AT4G26080 // AT4G11890 // AT5G57050 // AT3G11410 // AT1G53300 // AT1G07430 // AT1G52400 // AT2G01150
GO:0009787	P	regulation of abscisic acid-activated signaling pathway	9	608	78	28362	8.9e-05	0.0066	// AT5G11260 // AT4G26080 // AT4G11890 // AT5G57050 // AT3G11410 // AT1G53300 // AT1G07430 // AT1G52400 // AT2G01150
GO:0097306	P	cellular response to alcohol	17	608	267	28362	0.00012	0.0085	// AT5G11260 // AT4G26080 // AT2G46680 // AT1G52400 // AT4G35890 // AT1G72770 // AT1G45249 // AT1G53300 // AT1G01360 // AT3G11410 // AT2G30020 // AT5G57050 // AT1G07430 // AT4G37790 // AT4G11890 // AT2G01150 // AT1G69260
GO:0071215	P	cellular response to abscisic acid stimulus	17	608	267	28362	0.00012	0.0085	// AT5G11260 // AT4G26080 // AT2G46680 // AT1G52400 // AT4G35890 // AT1G72770 // AT1G45249 // AT1G53300 // AT1G01360 // AT3G11410 // AT2G30020 // AT5G57050 // AT1G07430 // AT4G37790 // AT4G11890 // AT2G01150 // AT1G69260
GO:0010043	P	response to zinc ion	7	608	47	28362	0.00013	0.0091	// AT1G21750 // AT3G09200 // AT4G35040 // AT2G32520 // AT5G13740 // AT1G19570 // AT5G01600
GO:0048511	P	rhythmic process	12	608	146	28362	0.00013	0.0091	// AT5G11260 // AT2G17840 // AT2G42540 // AT5G37260 // AT3G14620 // AT5G15840 // AT2G40080 // AT5G59570 // AT4G26150 // AT3G20810 // AT5G52310 // AT3G06500
GO:0010119	P	regulation of stomatal movement	8	608	67	28362	0.00018	0.012	// AT4G26080 // AT1G51140 // AT5G13740 // AT1G69530 // AT3G11410 // AT5G57050 // AT5G27150 // AT1G52400
GO:0055114	P	oxidation-reduction process	56	608	1566	28362	0.00019	0.012	// AT1G65980 // AT3G49120 // AT3G24170 // AT1G62180 // AT4G22880 // AT4G16760 // AT3G20100 // AT2G33380 // AT1G06430 // AT2G25450 // AT2G39800 // AT3G55610 // AT3G08610 // AT1G17745 // AT4G16330 // AT4G39330 // AT4G04610 // AT2G41730 // AT4G34230 // AT4G39210 // ATCG00020 // AT2G46505 // AT5G52320 // AT2G12190 // AT1G06640 // AT3G20810 // AT5G01600 // AT3G28480 // AT5G05600 // AT5G14780 // AT5G55…
GO:0043207	P	response to external biotic stimulus	46	608	1212	28362	0.00021	0.013	// AT3G49120 // AT3G50970 // AT3G61890 // AT4G16760 // AT3G09440 // AT2G33380 // AT5G24660 // AT5G52310 // AT1G12060 // AT2G30020 // AT1G52400 // AT1G19570 // AT1G61340 // AT1G58360 // AT1G27950 // AT1G51090 // AT5G52450 // AT5G24770 // AT4G23670 // AT5G13740 // AT4G02380 // AT1G19670 // AT2G35940 // AT3G29090 // AT5G01600 // AT1G52410 // AT5G09440 // AT1G73680 // AT3G57260 // AT3G45140 // AT3G23…
GO:0006979	P	response to oxidative stress	23	608	453	28362	0.00021	0.013	// AT3G49120 // AT3G24170 // AT5G59820 // AT2G39800 // AT1G19570 // AT1G35720 // AT1G32870 // AT5G13930 // AT2G29450 // AT4G02380 // AT1G07400 // AT5G55070 // AT5G24770 // AT1G73680 // AT2G26150 // AT3G12580 // AT1G56600 // AT5G52310 // AT5G05410 // AT5G01600 // AT4G34710 // AT3G07700 // AT4G11600
GO:0010118	P	stomatal movement	10	608	109	28362	0.00021	0.013	// AT1G52400 // AT4G26080 // AT1G51140 // AT5G13740 // AT2G33380 // AT1G69530 // AT3G11410 // AT5G57050 // AT5G27150 // AT3G08590
GO:0034220	P	ion transmembrane transport	16	608	255	28362	0.00022	0.013	// AT2G37180 // AT2G16510 // AT4G30190 // AT1G35720 // AT1G58360 // AT5G61810 // AT5G20380 // AT5G18290 // AT1G07430 // AT5G55290 // AT1G19570 // AT4G00430 // AT5G27150 // AT2G39010 // AT2G37170 // AT2G22500
GO:0009607	P	response to biotic stimulus	47	608	1253	28362	0.00023	0.013	// AT3G49120 // AT3G50970 // AT3G61890 // AT4G16760 // AT3G09440 // AT2G33380 // AT5G24660 // AT5G52310 // AT1G12060 // AT2G30020 // AT1G52400 // AT1G19570 // AT1G61340 // AT1G58360 // AT1G27950 // AT1G51090 // AT5G52450 // AT5G24770 // AT4G23670 // AT5G13740 // AT4G02380 // AT1G19670 // AT2G35940 // AT3G29090 // AT5G01600 // AT1G52410 // AT5G09440 // AT1G73680 // AT1G70830 // AT3G57260 // AT3G45…
GO:0006470	P	protein dephosphorylation	10	608	114	28362	0.0003	0.017	// AT3G05640 // AT4G26080 // AT2G25620 // AT1G72770 // AT3G11410 // AT3G16800 // AT2G30020 // AT5G57050 // AT1G07430 // AT1G64040
GO:0009813	P	flavonoid biosynthetic process	9	608	93	28362	0.0003	0.017	// AT4G16330 // AT5G05600 // AT5G11260 // AT5G49330 // AT4G25640 // AT4G22880 // AT3G21560 // AT5G13930 // AT1G30530
GO:0009644	P	response to high light intensity	8	608	76	28362	0.00039	0.02	// AT2G17840 // AT3G12580 // AT1G01470 // AT1G06430 // AT2G26150 // AT5G57050 // AT2G42540 // AT4G04020
GO:0051707	P	response to other organism	45	608	1210	28362	0.00037	0.02	// AT3G49120 // AT3G50970 // AT3G61890 // AT4G16760 // AT3G09440 // AT2G33380 // AT5G24660 // AT5G52310 // AT2G30020 // AT1G52400 // AT1G19570 // AT1G61340 // AT1G58360 // AT1G27950 // AT1G51090 // AT5G52450 // AT5G24770 // AT4G23670 // AT5G13740 // AT4G02380 // AT1G19670 // AT2G35940 // AT3G29090 // AT5G01600 // AT1G52410 // AT5G09440 // AT1G73680 // AT3G57260 // AT3G45140 // AT3G23820 // AT3G15…
GO:0019344	P	cysteine biosynthetic process	5	608	25	28362	0.00037	0.02	// AT1G64660 // AT4G04610 // AT4G21990 // AT5G28030 // AT1G62180
GO:1901606	P	alpha-amino acid catabolic process	6	608	40	28362	0.00038	0.02	// AT1G06570 // AT4G33150 // AT5G55070 // AT5G36160 // AT1G64660 // AT4G34710
GO:0019752	P	carboxylic acid metabolic process	35	608	864	28362	0.00039	0.02	// AT1G07720 // AT1G64660 // AT2G39020 // AT1G11840 // AT5G36160 // AT2G33380 // AT2G39800 // AT3G55610 // AT1G52400 // AT1G17745 // AT3G08590 // AT1G20560 // AT4G33150 // AT2G04350 // AT1G56430 // AT2G36580 // ATCG00250 // AT2G43820 // AT1G05560 // AT5G55070 // AT1G73680 // AT3G45140 // AT3G23820 // AT3G44310 // AT4G16760 // AT3G21780 // AT5G51830 // AT4G08870 // AT1G02205 // AT5G14800 // AT5G28…
GO:0009070	P	serine family amino acid biosynthetic process	6	608	41	28362	0.00043	0.022	// AT1G64660 // AT1G62180 // AT5G28030 // AT4G04610 // AT4G21990 // AT1G17745
GO:0009642	P	response to light intensity	11	608	144	28362	0.00045	0.023	// AT2G17840 // AT3G12580 // AT5G59820 // AT1G01470 // AT1G06430 // AT2G26150 // AT1G21400 // AT5G57050 // AT4G02380 // AT2G42540 // AT4G04020
GO:0006534	P	cysteine metabolic process	5	608	27	28362	0.0005	0.025	// AT1G64660 // AT4G04610 // AT4G21990 // AT5G28030 // AT1G62180
GO:0006811	P	ion transport	28	608	645	28362	0.00053	0.026	// AT4G38250 // AT5G18290 // AT5G65990 // AT4G30190 // AT4G16370 // AT1G19570 // AT2G16510 // AT1G58360 // AT2G37180 // AT5G55290 // AT4G00430 // AT2G39010 // AT1G11960 // AT5G47560 // AT1G69870 // AT3G15352 // AT5G24030 // AT5G27150 // AT5G52050 // AT2G37170 // AT5G61810 // AT5G50200 // AT5G20380 // AT1G35720 // AT5G01600 // AT1G66240 // AT1G07430 // AT2G22500
GO:0071229	P	cellular response to acid chemical	23	608	485	28362	0.00053	0.026	// AT5G11260 // AT1G53300 // AT1G64660 // AT4G37790 // AT1G01360 // AT2G30020 // AT1G52400 // AT2G15970 // AT2G01150 // AT4G02380 // AT4G35890 // AT4G26080 // AT4G26150 // AT5G57050 // AT1G72770 // AT1G69260 // AT1G29395 // AT1G45249 // AT3G11410 // AT2G46680 // AT1G07430 // AT4G11890 // AT1G28480
GO:0009069	P	serine family amino acid metabolic process	7	608	63	28362	0.00066	0.031	// AT1G64660 // AT1G62180 // AT5G28030 // AT4G04610 // AT4G21990 // AT1G17745 // AT3G23810
GO:0046686	P	response to cadmium ion	18	608	343	28362	0.0007	0.033	// AT1G65980 // AT1G52827 // AT3G12580 // AT1G11840 // AT5G14780 // AT3G09200 // AT2G37760 // AT5G20830 // AT3G09440 // AT5G15650 // AT1G35720 // AT1G60710 // AT2G33590 // AT4G16760 // AT4G23670 // AT3G08590 // AT4G11600 // AT5G51830
GO:0050789	P	regulation of biological process	146	608	5306	28362	0.00076	0.034	// AT1G64380 // AT5G11260 // AT2G33380 // AT4G37790 // AT2G25450 // AT4G28140 // AT2G01150 // AT1G21750 // AT2G27230 // AT2G46690 // AT1G51140 // AT5G59570 // AT5G33210 // AT1G26260 // AT5G16450 // AT1G64810 // AT2G35940 // AT3G20810 // AT1G67360 // AT4G36900 // AT4G26080 // AT4G39730 // AT3G47640 // AT5G57050 // AT2G40970 // AT4G19700 // AT1G51090 // AT5G04340 // AT1G20450 // AT2G42540 // AT4G15…
GO:0016053	P	organic acid biosynthetic process	24	608	531	28362	0.00077	0.034	// AT1G07720 // AT1G64660 // AT1G62180 // AT2G33380 // AT2G39800 // AT3G55610 // AT1G17745 // AT2G04350 // AT1G56430 // ATCG00250 // AT5G38530 // AT1G73680 // AT3G45140 // AT3G23820 // AT3G44310 // AT4G16760 // AT3G17810 // AT5G51830 // AT4G04610 // AT1G02205 // AT5G14800 // AT5G28030 // AT1G13280 // AT4G21990
GO:1901607	P	alpha-amino acid biosynthetic process	11	608	154	28362	0.00076	0.034	// AT1G64660 // AT1G62180 // AT5G14800 // AT5G28030 // AT4G04610 // AT2G39800 // AT3G55610 // ATCG00250 // AT4G21990 // AT1G17745 // AT5G38530
GO:0009812	P	flavonoid metabolic process	9	608	109	28362	0.00088	0.038	// AT4G16330 // AT5G05600 // AT5G11260 // AT5G49330 // AT4G25640 // AT4G22880 // AT3G21560 // AT5G13930 // AT1G30530
GO:2000026	P	regulation of multicellular organismal development	21	608	442	28362	0.00089	0.038	// AT1G20450 // AT5G11260 // AT2G40080 // AT1G26260 // AT2G43820 // AT5G37260 // AT5G22290 // AT5G15840 // AT5G56040 // AT5G52310 // AT1G45050 // AT5G59570 // AT4G26150 // AT1G07430 // AT2G30140 // AT1G01030 // AT1G53160 // AT5G62620 // AT3G06500 // AT5G13200 // AT5G04340
GO:0044282	P	small molecule catabolic process	11	608	162	28362	0.0011	0.048	// AT1G64660 // AT4G33150 // AT1G11840 // AT5G55070 // AT3G21780 // AT5G36160 // AT1G06570 // AT2G22780 // AT4G34710 // AT4G16760 // AT3G08590
GO:0065007	P	biological regulation	162	608	6062	28362	0.0013	0.055	// AT1G64380 // AT5G11260 // AT5G24030 // AT2G33380 // AT3G16800 // AT2G25450 // AT3G10870 // AT4G28140 // AT2G01150 // AT1G21750 // AT2G27230 // AT2G46690 // AT1G51140 // AT5G59570 // AT5G33210 // AT1G26260 // AT2G03760 // AT5G16450 // AT1G64810 // AT2G35940 // AT3G20810 // AT1G67360 // AT4G36900 // AT4G26080 // AT4G35550 // AT4G39730 // AT3G47640 // AT5G57050 // AT2G40970 // AT4G19700 // AT1G51…
GO:0044283	P	small molecule biosynthetic process	27	608	653	28362	0.0013	0.055	// AT1G07720 // AT1G64660 // AT1G62180 // AT2G33380 // AT2G39800 // AT3G55610 // AT1G17745 // AT2G04350 // AT1G56430 // AT5G13930 // ATCG00250 // AT5G38530 // AT1G06570 // AT1G73680 // AT5G15650 // AT3G45140 // AT3G23820 // AT3G44310 // AT4G16760 // AT3G17810 // AT5G51830 // AT4G04610 // AT1G02205 // AT5G14800 // AT5G28030 // AT1G13280 // AT4G21990
GO:0051239	P	regulation of multicellular organismal process	22	608	490	28362	0.0014	0.056	// AT5G11260 // AT1G26260 // AT5G15840 // AT5G52310 // AT1G45050 // AT2G30140 // AT1G01030 // AT1G53160 // AT2G40080 // AT5G59570 // AT2G43820 // AT5G37260 // AT5G13200 // AT5G04340 // AT1G20450 // AT3G20470 // AT5G22290 // AT5G56040 // AT4G26150 // AT1G07430 // AT5G62620 // AT3G06500
GO:1990267	P	response to transition metal nanoparticle	9	608	119	28362	0.0016	0.063	// AT1G21750 // AT3G09200 // AT5G24770 // AT4G35040 // AT2G32520 // AT3G15352 // AT5G13740 // AT1G19570 // AT5G01600
GO:0009753	P	response to jasmonic acid	13	608	225	28362	0.0017	0.067	// AT4G22880 // AT1G61340 // AT5G24780 // AT5G24770 // AT5G37260 // AT4G23600 // AT4G35890 // AT1G54040 // AT3G45140 // AT5G13930 // AT1G19570 // AT4G34710 // AT1G28480
GO:0016054	P	organic acid catabolic process	9	608	121	28362	0.0017	0.069	// AT1G06570 // AT4G33150 // AT5G55070 // AT5G36160 // AT1G64660 // AT2G22780 // AT4G34710 // AT4G16760 // AT3G21780
GO:0071396	P	cellular response to lipid	19	608	409	28362	0.0019	0.076	// AT5G11260 // AT4G37790 // AT4G26080 // AT2G46680 // AT4G35890 // AT1G52400 // AT3G54030 // AT1G72770 // AT1G45249 // AT1G53300 // AT1G01360 // AT3G11410 // AT2G30020 // AT5G57050 // AT1G07430 // AT4G26150 // AT4G11890 // AT2G01150 // AT1G69260
GO:0006520	P	cellular amino acid metabolic process	16	608	320	28362	0.0022	0.083	// AT4G08870 // AT1G05560 // AT1G64660 // AT2G39020 // AT5G55070 // AT5G14800 // AT5G36160 // AT5G28030 // AT4G23600 // AT2G39800 // AT3G55610 // AT4G34710 // ATCG00250 // AT1G17745 // AT2G43820 // AT4G33150
GO:0009636	P	response to toxic substance	8	608	102	28362	0.0023	0.086	// AT5G05600 // AT1G52827 // AT2G37760 // AT4G23600 // ATCG00020 // AT3G21560 // AT2G29450 // AT5G39050
GO:0046395	P	carboxylic acid catabolic process	8	608	105	28362	0.0027	0.1	// AT1G64660 // AT4G33150 // AT5G55070 // AT5G36160 // AT2G22780 // AT4G34710 // AT4G16760 // AT3G21780
GO:0048580	P	regulation of post-embryonic development	16	608	329	28362	0.0028	0.1	// AT1G20450 // AT5G11260 // AT2G40080 // AT1G26260 // AT5G37260 // AT5G22290 // AT5G15840 // AT1G53160 // AT1G45050 // AT5G59570 // AT4G26150 // AT1G07430 // AT2G30140 // AT2G43820 // AT3G06500 // AT5G13200
GO:0016311	P	dephosphorylation	10	608	158	28362	0.003	0.11	// AT3G05640 // AT4G26080 // AT2G25620 // AT1G72770 // AT3G11410 // AT3G16800 // AT2G30020 // AT5G57050 // AT1G07430 // AT1G64040
GO:0044711	P	single-organism biosynthetic process	55	608	1735	28362	0.0031	0.11	// AT2G18990 // AT1G07720 // AT1G64660 // AT1G62180 // AT5G66410 // AT5G20830 // AT3G20100 // AT2G33380 // AT3G21560 // AT2G25450 // AT2G39800 // AT3G55610 // AT4G30190 // AT1G17745 // AT2G23910 // AT4G39330 // ATCG00250 // AT2G33590 // AT4G39210 // AT2G04350 // AT1G56430 // AT4G34230 // AT5G13930 // AT5G15470 // AT5G62220 // AT1G30530 // AT5G38530 // AT4G22880 // AT1G06570 // AT5G49330 // AT2G22…
GO:0055085	P	transmembrane transport	26	608	667	28362	0.0034	0.12	// AT4G17550 // AT5G18290 // AT1G61890 // AT4G30190 // AT4G16370 // AT1G19570 // AT5G52450 // AT2G16510 // AT1G58360 // AT1G66760 // AT2G37180 // AT5G55290 // AT1G67300 // AT4G00430 // AT2G39010 // AT5G24030 // AT5G27150 // AT5G52050 // AT2G37170 // AT4G25640 // AT5G61810 // AT5G20380 // AT1G35720 // AT1G05940 // AT1G07430 // AT2G22500
GO:0044248	P	cellular catabolic process	36	608	1024	28362	0.0034	0.12	// AT1G77680 // AT1G64660 // AT3G17000 // AT4G01610 // AT5G36160 // AT4G16760 // AT5G56150 // AT1G06430 // AT1G45050 // AT3G49120 // AT4G04210 // AT2G01150 // AT1G11840 // AT3G21780 // AT2G29450 // AT1G19670 // AT1G47128 // AT4G02890 // AT5G48180 // AT1G64390 // AT5G01720 // AT5G55070 // AT2G01670 // AT4G19700 // AT3G17810 // AT3G23920 // AT4G33150 // AT1G02205 // AT1G54040 // AT5G60360 // AT2G22…
GO:0009416	P	response to light stimulus	28	608	744	28362	0.0039	0.14	// AT1G07720 // AT5G11260 // AT2G17840 // AT5G59820 // AT3G49120 // AT5G15840 // AT1G06430 // AT5G49330 // AT2G40080 // AT5G15960 // AT1G51140 // AT1G32870 // AT5G13930 // AT4G02380 // AT2G35940 // AT2G37970 // AT1G52410 // AT2G26150 // AT5G57050 // AT2G42540 // AT3G12580 // AT1G01470 // AT4G04020 // AT5G05410 // AT1G21400 // AT4G26150 // AT1G69530 // AT1G26260
GO:0010260	P	organ senescence	8	608	114	28362	0.0043	0.15	// AT4G35890 // AT2G42540 // AT1G73680 // AT1G54040 // AT5G52310 // AT4G02380 // AT5G62620 // AT5G08290
GO:0010150	P	leaf senescence	8	608	114	28362	0.0043	0.15	// AT4G35890 // AT2G42540 // AT1G73680 // AT1G54040 // AT5G52310 // AT4G02380 // AT5G62620 // AT5G08290
GO:0009617	P	response to bacterium	19	608	441	28362	0.0043	0.15	// AT5G52310 // AT1G61340 // AT3G12580 // AT1G02205 // AT4G19700 // AT3G49120 // AT1G54040 // AT3G45140 // AT4G23670 // AT5G24660 // AT3G23820 // AT4G21610 // AT3G15352 // AT5G53120 // AT1G19670 // AT5G52640 // AT3G29090 // AT1G51090 // AT5G01600
GO:1902578	P	single-organism localization	36	608	1040	28362	0.0043	0.15	// AT2G38530 // AT5G59310 // AT1G61890 // AT4G30190 // AT3G25040 // AT4G16370 // AT2G16510 // AT1G58360 // AT1G27950 // AT1G56430 // AT2G37170 // AT5G52450 // AT5G55290 // AT5G13930 // AT1G09330 // AT4G00430 // AT1G67300 // AT5G01600 // AT4G30600 // AT5G26340 // AT2G25520 // AT3G09900 // AT4G17550 // AT5G27150 // AT5G52050 // AT1G66760 // AT4G32390 // AT4G25640 // AT5G61810 // AT1G25250 // AT1G35…
GO:0007568	P	aging	10	608	174	28362	0.0057	0.19	// AT5G52310 // AT4G35890 // AT2G42540 // AT1G73680 // AT1G54040 // AT4G05320 // AT5G60360 // AT4G02380 // AT5G62620 // AT5G08290
GO:0009699	P	phenylpropanoid biosynthetic process	8	608	121	28362	0.006	0.19	// AT4G22880 // AT4G30470 // AT2G33590 // AT4G34230 // AT4G39330 // AT5G13930 // AT1G55210 // AT2G23910
GO:0010224	P	response to UV-B	6	608	72	28362	0.006	0.19	// AT5G11260 // AT5G49330 // AT5G59820 // AT1G32870 // AT5G13930 // AT5G05410
GO:0031668	P	cellular response to extracellular stimulus	11	608	204	28362	0.006	0.19	// AT1G64660 // AT1G04770 // AT1G29395 // AT3G17810 // AT3G47640 // AT5G24660 // AT1G21400 // AT4G02380 // AT2G41240 // AT2G15970 // AT2G28060
GO:0070887	P	cellular response to chemical stimulus	39	608	1176	28362	0.006	0.19	// AT1G64380 // AT5G11260 // AT1G32870 // AT1G53300 // AT3G54030 // AT1G72770 // AT1G01360 // AT2G30020 // AT1G52400 // AT4G28140 // AT2G15970 // AT2G01150 // AT1G71130 // AT4G35040 // AT5G33210 // AT2G23340 // AT5G06370 // AT4G02380 // AT5G05600 // AT4G35890 // AT4G26080 // AT2G46680 // AT3G07700 // AT1G64660 // AT5G57050 // AT4G37790 // AT1G42990 // AT4G36900 // AT1G69260 // AT2G26150 // AT1G29…
GO:0048831	P	regulation of shoot system development	11	608	204	28362	0.006	0.19	// AT2G40080 // AT1G26260 // AT5G37260 // AT5G22290 // AT5G15840 // AT1G45050 // AT5G59570 // AT4G26150 // AT2G30140 // AT1G01030 // AT5G62620
GO:0009314	P	response to radiation	28	608	772	28362	0.0063	0.19	// AT1G07720 // AT5G11260 // AT2G17840 // AT5G59820 // AT3G49120 // AT5G15840 // AT1G06430 // AT5G49330 // AT2G40080 // AT5G15960 // AT1G51140 // AT1G32870 // AT5G13930 // AT4G02380 // AT2G35940 // AT2G37970 // AT1G52410 // AT2G26150 // AT5G57050 // AT2G42540 // AT3G12580 // AT1G01470 // AT4G04020 // AT5G05410 // AT1G21400 // AT4G26150 // AT1G69530 // AT1G26260
GO:0065008	P	regulation of biological quality	41	608	1255	28362	0.0063	0.19	// AT2G18990 // AT1G65980 // AT3G49120 // AT3G24170 // AT1G62180 // AT1G53300 // AT4G15680 // AT3G10870 // AT1G52400 // AT3G25040 // AT4G16370 // AT3G54960 // AT1G21750 // AT5G33210 // AT5G13930 // AT2G03760 // AT2G41240 // AT2G05520 // AT4G17550 // AT5G13740 // AT2G30540 // AT5G47560 // AT1G64500 // AT4G04610 // AT3G47640 // AT3G44310 // AT5G24030 // AT5G27150 // AT1G68570 // AT5G04340 // AT2G42…
GO:0009909	P	regulation of flower development	9	608	150	28362	0.0066	0.2	// AT2G40080 // AT1G26260 // AT5G37260 // AT5G22290 // AT5G15840 // AT1G45050 // AT5G59570 // AT4G26150 // AT2G30140
GO:1901701	P	cellular response to oxygen-containing compound	24	608	635	28362	0.0069	0.21	// AT5G11260 // AT1G53300 // AT3G54030 // AT4G37790 // AT1G01360 // AT2G30020 // AT1G52400 // AT2G15970 // AT2G01150 // AT4G02380 // AT4G35890 // AT4G26080 // AT4G26150 // AT1G64660 // AT5G57050 // AT1G72770 // AT1G69260 // AT1G29395 // AT1G45249 // AT3G11410 // AT2G46680 // AT1G07430 // AT4G11890 // AT1G28480
GO:0071496	P	cellular response to external stimulus	11	608	208	28362	0.0069	0.21	// AT1G64660 // AT1G04770 // AT1G29395 // AT3G17810 // AT3G47640 // AT5G24660 // AT1G21400 // AT4G02380 // AT2G41240 // AT2G15970 // AT2G28060
GO:0009063	P	cellular amino acid catabolic process	5	608	53	28362	0.0074	0.22	// AT1G64660 // AT5G36160 // AT4G33150 // AT4G34710 // AT5G55070
GO:0044765	P	single-organism transport	34	608	1004	28362	0.0075	0.22	// AT2G38530 // AT5G59310 // AT1G61890 // AT4G30190 // AT4G16370 // AT2G16510 // AT1G58360 // AT1G27950 // AT1G56430 // AT2G37170 // AT5G52450 // AT5G55290 // AT5G13930 // AT1G09330 // AT4G00430 // AT1G67300 // AT4G30600 // AT5G26340 // AT2G25520 // AT3G09900 // AT4G17550 // AT5G27150 // AT5G52050 // AT1G66760 // AT4G32390 // AT4G25640 // AT5G61810 // AT1G25250 // AT1G35720 // AT5G06530 // AT4G36…
GO:0010029	P	regulation of seed germination	6	608	76	28362	0.0076	0.22	// AT1G20450 // AT4G26150 // AT1G07430 // AT2G43820 // AT3G06500 // AT5G13200
GO:0009620	P	response to fungus	22	608	573	28362	0.008	0.23	// AT3G49120 // AT3G50970 // AT2G33380 // AT2G30020 // AT1G52400 // AT1G19570 // AT1G27950 // AT1G19670 // AT2G35940 // AT1G52410 // AT5G09440 // AT3G45140 // AT3G23820 // AT4G16760 // AT4G19700 // AT1G51090 // AT4G08870 // AT1G02205 // AT1G01470 // AT1G47128 // AT4G30650 // AT4G11890
GO:0009767	P	photosynthetic electron transport chain	5	608	56	28362	0.0091	0.26	// ATCG00280 // AT5G57050 // AT1G06430 // ATCG00020 // AT4G04020
GO:1900140	P	regulation of seedling development	6	608	79	28362	0.009	0.26	// AT1G20450 // AT4G26150 // AT1G07430 // AT2G43820 // AT3G06500 // AT5G13200
GO:0006576	P	cellular biogenic amine metabolic process	5	608	57	28362	0.0097	0.27	// AT4G08870 // AT5G53120 // AT1G56430 // AT4G34710 // AT5G38530
GO:0050794	P	regulation of cellular process	127	608	4857	28362	0.0099	0.28	// AT1G64380 // AT5G11260 // AT2G33380 // AT4G37790 // AT2G25450 // AT4G28140 // AT2G01150 // AT1G21750 // AT2G27230 // AT2G46690 // AT1G51140 // AT5G59570 // AT5G33210 // AT1G26260 // AT5G16450 // AT2G35940 // AT4G26080 // AT3G47640 // AT5G57050 // AT2G40970 // AT4G19700 // AT5G04340 // AT4G36900 // AT2G42540 // AT4G15680 // AT5G10930 // AT4G26150 // AT1G79110 // AT4G35550 // AT1G28480 // AT2G18…
GO:0032787	P	monocarboxylic acid metabolic process	19	608	481	28362	0.01	0.28	// AT1G05560 // AT1G07720 // AT1G02205 // AT1G11840 // AT2G43820 // AT2G04350 // AT1G73680 // AT3G08590 // AT2G36580 // AT3G45140 // AT1G13280 // AT3G23820 // AT2G22780 // AT3G44310 // AT1G52400 // AT3G21780 // AT1G20560 // AT4G16760 // AT5G51830
GO:0009698	P	phenylpropanoid metabolic process	9	608	164	28362	0.011	0.3	// AT4G22880 // AT4G30470 // AT2G33590 // AT3G21560 // AT4G34230 // AT4G39330 // AT5G13930 // AT1G55210 // AT2G23910
GO:0050793	P	regulation of developmental process	23	608	627	28362	0.011	0.3	// AT5G11260 // AT1G26260 // AT5G15840 // AT1G75410 // AT5G52310 // AT1G45050 // AT2G30140 // AT1G01030 // AT1G53160 // AT2G40080 // AT5G59570 // AT2G43820 // AT5G37260 // AT5G13200 // AT5G04340 // AT1G20450 // AT3G20470 // AT5G22290 // AT5G56040 // AT4G26150 // AT1G07430 // AT5G62620 // AT3G06500
GO:1901565	P	organonitrogen compound catabolic process	9	608	164	28362	0.011	0.3	// AT1G06570 // AT4G33150 // AT5G55070 // AT5G36160 // AT1G64660 // AT4G34710 // AT2G01670 // AT1G19670 // AT3G17810
GO:0010017	P	red or far-red light signaling pathway	6	608	83	28362	0.011	0.3	// AT5G11260 // AT2G40080 // AT2G42540 // AT2G37970 // AT5G15960 // AT5G15840
GO:0048878	P	chemical homeostasis	15	608	352	28362	0.011	0.3	// AT5G28030 // AT4G17550 // AT5G24030 // AT5G13740 // AT5G47560 // AT1G45249 // AT3G47640 // AT5G01600 // AT1G66240 // AT1G52400 // AT5G27150 // AT2G41240 // AT4G16370 // AT1G68570 // AT5G04340
GO:0009991	P	response to extracellular stimulus	11	608	225	28362	0.012	0.31	// AT1G64660 // AT1G04770 // AT1G29395 // AT3G17810 // AT3G47640 // AT5G24660 // AT1G21400 // AT4G02380 // AT2G41240 // AT2G15970 // AT2G28060
GO:0071489	P	cellular response to red or far red light	6	608	85	28362	0.012	0.32	// AT5G11260 // AT2G40080 // AT2G42540 // AT2G37970 // AT5G15960 // AT5G15840
GO:0009056	P	catabolic process	44	608	1430	28362	0.012	0.32	// AT1G77680 // AT1G64660 // AT3G17000 // AT4G01610 // AT5G36160 // AT4G16760 // AT5G56150 // AT2G30550 // AT1G06430 // AT1G45050 // AT3G49120 // AT3G43270 // AT3G08590 // AT2G01150 // AT3G48690 // AT1G11840 // AT4G04210 // AT2G36580 // AT2G29450 // AT1G19670 // AT1G47128 // AT4G02890 // AT5G48180 // AT1G64390 // AT5G45950 // AT5G55070 // AT3G21780 // AT2G01670 // AT5G01720 // AT4G19700 // AT3G17…
GO:0006820	P	anion transport	11	608	227	28362	0.012	0.32	// AT1G58360 // AT5G61810 // AT5G50200 // AT5G20380 // AT5G47560 // AT4G38250 // AT1G69870 // AT5G65990 // AT5G24030 // AT5G52050 // AT2G22500
GO:0050801	P	ion homeostasis	11	608	229	28362	0.013	0.33	// AT4G17550 // AT5G24030 // AT5G47560 // AT3G47640 // AT5G01600 // AT1G66240 // AT5G13740 // AT5G27150 // AT2G41240 // AT4G16370 // AT5G04340
GO:0009744	P	response to sucrose	5	608	62	28362	0.013	0.33	// AT4G34590 // AT4G37680 // AT5G20830 // AT1G21400 // AT2G28060
GO:0009755	P	hormone-mediated signaling pathway	28	608	821	28362	0.013	0.33	// AT1G64380 // AT5G11260 // AT1G53300 // AT3G54030 // AT1G72770 // AT1G01360 // AT2G30020 // AT1G52400 // AT4G28140 // AT2G01150 // AT2G46690 // AT5G33210 // AT2G23340 // AT4G35890 // AT4G26080 // AT4G26150 // AT5G57050 // AT4G37790 // AT4G36900 // AT1G69260 // AT1G45249 // AT1G71130 // AT3G11410 // AT2G46680 // AT1G07430 // AT4G11890 // AT2G20880 // AT1G28480
GO:0071214	P	cellular response to abiotic stimulus	10	608	202	28362	0.015	0.36	// AT5G11260 // AT2G40080 // AT2G42540 // AT2G37970 // AT5G15960 // AT1G29395 // AT1G64660 // AT5G15840 // AT4G02380 // AT2G15970
GO:1901575	P	organic substance catabolic process	39	608	1249	28362	0.015	0.36	// AT1G77680 // AT1G64660 // AT3G17000 // AT4G01610 // AT5G36160 // AT4G16760 // AT5G56150 // AT2G30550 // AT1G06430 // AT1G45050 // AT3G43270 // AT3G08590 // AT2G01150 // AT1G11840 // AT4G04210 // AT2G36580 // AT1G19670 // AT1G47128 // AT4G02890 // AT1G64390 // AT5G45950 // AT5G55070 // AT3G21780 // AT2G01670 // AT5G01720 // AT4G19700 // AT3G17810 // AT3G23920 // AT4G33150 // AT1G02205 // AT3G29…
GO:0044106	P	cellular amine metabolic process	5	608	64	28362	0.015	0.37	// AT4G08870 // AT5G53120 // AT1G56430 // AT4G34710 // AT5G38530
GO:0034285	P	response to disaccharide	5	608	65	28362	0.016	0.38	// AT4G34590 // AT4G37680 // AT5G20830 // AT1G21400 // AT2G28060
GO:0007154	P	cell communication	63	608	2223	28362	0.016	0.39	// AT1G64380 // AT5G11260 // AT5G65270 // AT3G08730 // AT1G04770 // AT4G13950 // AT3G54030 // AT5G15840 // AT1G72770 // AT5G24660 // AT2G30020 // AT1G52400 // AT4G28140 // AT3G25040 // AT2G15970 // AT2G01150 // AT4G26080 // AT2G43130 // AT2G40080 // AT2G46690 // AT5G15960 // AT5G33210 // AT1G16920 // AT1G32870 // AT5G58380 // AT2G23340 // AT4G23050 // AT4G02380 // AT1G08650 // AT2G41240 // AT2G28…
GO:0046394	P	carboxylic acid biosynthetic process	17	608	438	28362	0.017	0.4	// AT1G07720 // AT1G64660 // AT2G39800 // AT1G02205 // AT5G14800 // AT2G04350 // AT1G73680 // AT1G56430 // AT4G16760 // AT3G45140 // AT1G13280 // AT3G23820 // AT3G55610 // AT3G44310 // ATCG00250 // AT1G17745 // AT5G51830
GO:0055076	P	transition metal ion homeostasis	6	608	92	28362	0.017	0.41	// AT3G47640 // AT5G01600 // AT1G66240 // AT5G13740 // AT2G41240 // AT4G16370
GO:0009751	P	response to salicylic acid	10	608	209	28362	0.018	0.42	// AT1G05560 // AT1G61340 // AT3G20470 // AT5G37260 // AT4G35890 // AT2G33380 // AT4G05320 // AT2G03760 // AT1G28480 // AT2G05520
GO:0044712	P	single-organism catabolic process	21	608	585	28362	0.018	0.42	// AT5G48180 // AT1G64660 // AT1G54040 // AT4G33150 // AT1G11840 // AT5G55070 // AT3G21780 // AT5G36160 // AT4G16760 // AT1G06570 // AT2G30550 // AT2G36580 // AT2G22780 // AT2G29450 // AT4G34710 // AT2G01670 // AT1G19670 // AT1G02205 // AT3G08590 // AT3G17810 // AT5G45950
GO:0051704	P	multi-organism process	48	608	1631	28362	0.019	0.44	// AT3G49120 // AT3G50970 // AT3G04620 // AT3G61890 // AT4G16760 // AT5G13740 // AT2G33380 // AT5G24660 // AT5G52310 // AT2G30020 // AT1G52400 // AT1G19570 // AT1G61340 // AT1G58360 // AT1G27950 // AT1G56430 // AT1G51090 // AT5G52450 // AT5G24770 // AT4G23670 // AT5G15470 // AT4G02380 // AT1G19670 // AT2G35940 // AT3G29090 // AT5G01600 // AT1G52410 // AT5G09440 // AT1G73680 // AT3G57260 // AT3G09…
GO:0042440	P	pigment metabolic process	9	608	181	28362	0.019	0.45	// AT4G22880 // AT5G11260 // AT5G49330 // AT1G06570 // AT3G21560 // AT5G13930 // AT4G26150 // AT1G19670 // AT1G30530
GO:0009809	P	lignin biosynthetic process	5	608	70	28362	0.021	0.47	// AT4G34230 // AT4G30470 // AT4G39330 // AT2G23910 // AT2G33590
GO:0006855	P	drug transmembrane transport	5	608	70	28362	0.021	0.47	// AT5G52450 // AT5G52050 // AT1G66760 // AT1G61890 // AT4G25640
GO:0098771	P	inorganic ion homeostasis	10	608	215	28362	0.021	0.47	// AT4G17550 // AT5G47560 // AT3G47640 // AT5G01600 // AT1G66240 // AT5G13740 // AT5G27150 // AT2G41240 // AT4G16370 // AT5G04340
GO:0009064	P	glutamine family amino acid metabolic process	5	608	71	28362	0.022	0.49	// AT4G08870 // AT5G14800 // AT2G39800 // AT3G55610 // AT4G34710
GO:0080134	P	regulation of response to stress	13	608	316	28362	0.023	0.5	// AT3G49120 // AT4G11890 // AT2G25620 // AT1G32870 // AT4G19700 // AT1G67360 // AT1G51090 // AT5G24660 // AT3G51960 // AT3G25040 // AT5G52050 // AT2G20880 // AT2G01150
GO:0048583	P	regulation of response to stimulus	20	608	565	28362	0.024	0.52	// AT5G11260 // AT4G11890 // AT4G26080 // AT2G25620 // AT1G32870 // AT5G52050 // AT1G52400 // AT3G51960 // AT3G49120 // AT1G51090 // AT1G53300 // AT5G24660 // AT3G11410 // AT1G67360 // AT5G57050 // AT1G07430 // AT3G25040 // AT4G19700 // AT2G20880 // AT2G01150
GO:0009639	P	response to red or far red light	10	608	222	28362	0.025	0.55	// AT5G11260 // AT2G40080 // AT2G42540 // AT2G37970 // AT1G52410 // AT5G15960 // AT5G15840 // AT1G32870 // AT1G69530 // AT2G35940
GO:0015893	P	drug transport	5	608	74	28362	0.025	0.55	// AT5G52450 // AT5G52050 // AT1G66760 // AT1G61890 // AT4G25640
GO:0042493	P	response to drug	5	608	75	28362	0.027	0.57	// AT5G52450 // AT5G52050 // AT1G66760 // AT1G61890 // AT4G25640
GO:0015711	P	organic anion transport	6	608	103	28362	0.028	0.59	// AT1G58360 // AT5G47560 // AT4G38250 // AT5G65990 // AT5G52050 // AT2G22500
GO:0046942	P	carboxylic acid transport	6	608	103	28362	0.028	0.59	// AT1G58360 // AT5G47560 // AT4G38250 // AT5G65990 // AT5G52050 // AT2G22500
GO:0050832	P	defense response to fungus	18	608	504	28362	0.028	0.6	// AT4G08870 // AT3G49120 // AT3G50970 // AT1G02205 // AT1G52410 // AT4G11890 // AT1G01470 // AT5G09440 // AT1G27950 // AT2G33380 // AT3G23820 // AT2G30020 // AT1G52400 // AT1G19670 // AT1G47128 // AT4G30650 // AT4G19700 // AT1G51090
GO:0009743	P	response to carbohydrate	7	608	133	28362	0.029	0.6	// AT1G45249 // AT4G37680 // AT5G20830 // AT4G34590 // AT5G52310 // AT1G21400 // AT2G28060
GO:0032870	P	cellular response to hormone stimulus	28	608	879	28362	0.028	0.6	// AT1G64380 // AT5G11260 // AT1G53300 // AT3G54030 // AT1G72770 // AT1G01360 // AT2G30020 // AT1G52400 // AT4G28140 // AT2G01150 // AT2G46690 // AT5G33210 // AT2G23340 // AT4G35890 // AT4G26080 // AT4G26150 // AT5G57050 // AT4G37790 // AT4G36900 // AT1G69260 // AT1G45249 // AT1G71130 // AT3G11410 // AT2G46680 // AT1G07430 // AT4G11890 // AT2G20880 // AT1G28480
GO:0048518	P	positive regulation of biological process	28	608	881	28362	0.029	0.6	// AT5G11260 // AT3G61890 // AT3G49120 // AT5G24660 // AT1G52400 // AT3G25040 // AT2G01150 // AT1G45249 // AT2G40080 // AT2G27230 // AT3G08730 // AT2G43820 // AT1G67360 // AT5G49330 // AT2G26150 // AT1G53300 // AT3G56290 // AT3G20470 // AT1G25250 // AT5G22290 // AT4G34590 // AT1G32870 // AT5G05410 // AT2G46680 // AT1G07430 // AT4G27410 // AT4G11890 // AT1G26260
GO:0006091	P	generation of precursor metabolites and energy	14	608	364	28362	0.03	0.61	// AT2G41730 // AT5G55070 // AT4G39210 // AT3G08590 // ATCG00020 // AT1G06430 // AT3G22370 // AT2G46505 // AT2G22780 // AT5G57050 // AT1G22840 // AT4G04020 // ATCG00280 // AT2G36580
GO:0048584	P	positive regulation of response to stimulus	9	608	196	28362	0.03	0.61	// AT3G49120 // AT1G32870 // AT1G52400 // AT1G67360 // AT1G53300 // AT1G07430 // AT3G25040 // AT4G11890 // AT2G01150
GO:0000302	P	response to reactive oxygen species	8	608	166	28362	0.031	0.63	// AT3G24170 // AT2G26150 // AT5G52310 // AT5G05410 // AT5G01600 // AT4G02380 // AT3G12580 // AT1G19570
GO:0010243	P	response to organonitrogen compound	8	608	166	28362	0.031	0.63	// AT1G42990 // AT1G64380 // AT1G61340 // AT2G26150 // AT5G66400 // AT5G59820 // AT4G28140 // AT5G04340
GO:0071495	P	cellular response to endogenous stimulus	28	608	890	28362	0.032	0.65	// AT1G64380 // AT5G11260 // AT1G53300 // AT3G54030 // AT1G72770 // AT1G01360 // AT2G30020 // AT1G52400 // AT4G28140 // AT2G01150 // AT2G46690 // AT5G33210 // AT2G23340 // AT4G35890 // AT4G26080 // AT4G26150 // AT5G57050 // AT4G37790 // AT4G36900 // AT1G69260 // AT1G45249 // AT1G71130 // AT3G11410 // AT2G46680 // AT1G07430 // AT4G11890 // AT2G20880 // AT1G28480
GO:0048367	P	shoot system development	28	608	896	28362	0.035	0.69	// AT1G26260 // AT5G15840 // AT1G54040 // AT5G52310 // AT1G45050 // AT3G10870 // AT2G30140 // AT1G01030 // AT1G23290 // AT2G40080 // AT4G24960 // AT5G59570 // AT2G42540 // AT4G02380 // AT3G20810 // AT5G08290 // AT4G35890 // AT5G37260 // AT1G73680 // AT5G27150 // AT3G04680 // AT4G25640 // AT1G25250 // AT5G22290 // AT1G53160 // AT5G01600 // AT4G26150 // AT5G62620
GO:0031669	P	cellular response to nutrient levels	8	608	170	28362	0.035	0.69	// AT1G64660 // AT1G04770 // AT3G47640 // AT5G24660 // AT1G21400 // AT2G41240 // AT3G17810 // AT2G28060
GO:0051234	P	establishment of localization	65	608	2406	28362	0.035	0.69	// AT2G38530 // AT5G02270 // AT5G59310 // AT5G65270 // AT1G11960 // AT4G17550 // AT4G38250 // AT5G18290 // AT5G65990 // AT1G79260 // AT1G61890 // AT4G30190 // AT3G25040 // AT4G16370 // AT1G19570 // AT2G37180 // AT2G43130 // AT2G16510 // AT1G58360 // AT1G27950 // AT1G56430 // AT2G37170 // AT5G52450 // AT5G55290 // AT5G13930 // AT1G09330 // AT4G00430 // AT1G67300 // AT1G68570 // AT5G16300 // AT5G01…
GO:0009891	P	positive regulation of biosynthetic process	15	608	409	28362	0.036	0.69	// AT1G45249 // AT5G11260 // AT5G49330 // AT2G27230 // AT3G61890 // AT1G25250 // AT5G22290 // AT4G34590 // AT3G08730 // AT5G24660 // AT5G05410 // AT2G26150 // AT2G46680 // AT4G27410 // AT3G56290
GO:0044767	P	single-organism developmental process	82	608	3131	28362	0.036	0.69	// AT1G02205 // AT2G42540 // AT5G11260 // AT1G54040 // AT3G49120 // AT3G04620 // AT3G61890 // AT4G16760 // AT3G55500 // AT5G15840 // AT1G06430 // AT2G39800 // AT1G45050 // AT3G55610 // AT3G10870 // AT2G30140 // AT1G01030 // AT1G53160 // AT4G16370 // AT1G23290 // AT1G27950 // AT1G21750 // AT1G26770 // AT2G40080 // AT4G24960 // AT1G29160 // AT2G27230 // AT2G46690 // AT3G08590 // AT1G51140 // AT4G15…
GO:0009908	P	flower development	18	608	520	28362	0.037	0.71	// AT2G40080 // AT4G24960 // AT4G25640 // AT1G26260 // AT5G37260 // AT1G25250 // AT5G22290 // AT5G15840 // AT1G53160 // AT3G04680 // AT1G45050 // AT5G59570 // AT4G26150 // AT2G30140 // AT1G01030 // AT3G20810 // AT1G23290 // AT5G01600
GO:0022900	P	electron transport chain	6	608	112	28362	0.038	0.74	// ATCG00020 // AT1G06430 // AT1G22840 // AT5G57050 // AT4G04020 // ATCG00280
GO:0009657	P	plastid organization	9	608	207	28362	0.039	0.75	// AT2G42540 // AT5G24020 // AT1G64500 // AT5G24660 // ATCG00250 // AT1G64810 // AT1G04770 // AT1G06430 // AT3G56290
GO:0044550	P	secondary metabolite biosynthetic process	12	608	311	28362	0.041	0.78	// AT4G22880 // AT4G30470 // AT2G33590 // AT1G64950 // AT4G34230 // AT3G20100 // AT2G25450 // AT4G39330 // AT5G13930 // AT3G03470 // AT1G55210 // AT2G23910
GO:0019748	P	secondary metabolic process	17	608	492	28362	0.042	0.79	// AT4G22880 // AT4G30470 // AT5G48180 // AT1G64950 // AT4G34230 // AT2G33590 // AT3G20100 // AT1G54040 // AT3G21560 // AT2G25450 // AT4G39330 // AT5G13930 // AT2G23910 // AT1G55210 // AT3G10450 // AT3G03470 // AT2G29450
GO:0006810	P	transport	64	608	2391	28362	0.042	0.79	// AT2G38530 // AT5G02270 // AT5G59310 // AT5G65270 // AT1G11960 // AT4G17550 // AT4G38250 // AT5G18290 // AT5G65990 // AT1G79260 // AT1G61890 // AT4G30190 // AT3G25040 // AT4G16370 // AT1G19570 // AT2G37180 // AT2G43130 // AT2G16510 // AT1G58360 // AT1G27950 // AT1G56430 // AT2G37170 // AT5G52450 // AT5G55290 // AT5G13930 // AT1G09330 // AT4G00430 // AT1G67300 // AT1G68570 // AT5G16300 // AT5G01…
GO:0009411	P	response to UV	6	608	115	28362	0.043	0.79	// AT5G11260 // AT5G49330 // AT5G59820 // AT1G32870 // AT5G13930 // AT5G05410
GO:0015980	P	energy derivation by oxidation of organic compounds	7	608	146	28362	0.043	0.8	// AT2G41730 // AT5G55070 // AT4G39210 // AT3G22370 // AT2G46505 // AT2G22780 // AT1G22840
GO:0098660	P	inorganic ion transmembrane transport	8	608	178	28362	0.043	0.8	// AT2G16510 // AT1G35720 // AT5G61810 // AT4G30190 // AT5G55290 // AT1G07430 // AT5G27150 // AT2G22500
GO:0090567	P	reproductive shoot system development	18	608	533	28362	0.044	0.81	// AT2G40080 // AT4G24960 // AT4G25640 // AT1G26260 // AT5G37260 // AT1G25250 // AT5G22290 // AT5G15840 // AT1G53160 // AT3G04680 // AT1G45050 // AT5G59570 // AT4G26150 // AT2G30140 // AT1G01030 // AT3G20810 // AT1G23290 // AT5G01600
GO:0046148	P	pigment biosynthetic process	7	608	148	28362	0.046	0.83	// AT4G22880 // AT1G06570 // AT5G49330 // AT3G21560 // AT5G13930 // AT4G26150 // AT1G30530
GO:0055065	P	metal ion homeostasis	7	608	149	28362	0.047	0.85	// AT3G47640 // AT5G01600 // AT1G66240 // AT5G13740 // AT5G27150 // AT2G41240 // AT4G16370
GO:0015672	P	monovalent inorganic cation transport	8	608	182	28362	0.048	0.86	// AT2G16510 // AT1G35720 // AT5G47560 // AT4G30190 // AT5G55290 // AT1G07430 // AT5G27150 // AT2G22500
GO:0009658	P	chloroplast organization	7	608	150	28362	0.048	0.86	// AT5G24020 // AT1G64500 // AT5G24660 // ATCG00250 // AT1G64810 // AT1G04770 // AT3G56290
GO:0048366	P	leaf development	13	608	356	28362	0.049	0.87	// AT4G35890 // AT2G42540 // AT1G73680 // AT1G25250 // AT1G54040 // AT5G52310 // AT1G45050 // AT5G01600 // AT4G02380 // AT5G27150 // AT1G01030 // AT5G62620 // AT5G08290
GO:0009739	P	response to gibberellin	7	608	152	28362	0.051	0.9	// AT5G11260 // AT5G37260 // AT4G23060 // AT4G26150 // AT1G07430 // AT1G69530 // AT4G19700
GO:0032502	P	developmental process	83	608	3233	28362	0.051	0.9	// AT1G02205 // AT2G42540 // AT5G11260 // AT1G54040 // AT3G49120 // AT3G04620 // AT3G61890 // AT4G16760 // AT3G55500 // AT5G15840 // AT1G06430 // AT2G39800 // AT1G45050 // AT3G55610 // AT3G10870 // AT2G30140 // AT1G01030 // AT1G53160 // AT4G16370 // AT1G23290 // AT1G27950 // AT1G21750 // AT1G26770 // AT2G40080 // AT4G24960 // AT1G29160 // AT2G27230 // AT2G46690 // AT3G08590 // AT1G51140 // AT4G15…
GO:0031328	P	positive regulation of cellular biosynthetic process	14	608	396	28362	0.052	0.92	// AT1G45249 // AT5G49330 // AT2G27230 // AT3G61890 // AT1G25250 // AT5G22290 // AT4G34590 // AT3G08730 // AT5G24660 // AT5G05410 // AT2G26150 // AT2G46680 // AT4G27410 // AT3G56290
GO:0098542	P	defense response to other organism	28	608	936	28362	0.054	0.92	// AT3G49120 // AT3G50970 // AT4G16760 // AT2G33380 // AT5G24660 // AT2G30020 // AT1G52400 // AT1G27950 // AT1G52410 // AT4G23670 // AT1G19670 // AT1G47128 // AT3G29090 // AT5G24770 // AT5G09440 // AT3G57260 // AT3G23820 // AT5G53120 // AT4G19700 // AT1G51090 // AT4G08870 // AT1G02205 // AT2G25620 // AT1G01470 // AT1G54040 // AT5G52640 // AT4G30650 // AT4G11890
GO:0007275	P	multicellular organism development	73	608	2811	28362	0.053	0.92	// AT2G42540 // AT5G11260 // AT1G54040 // AT3G04620 // AT3G61890 // AT4G16760 // AT1G67360 // AT5G15840 // AT1G06430 // AT2G39800 // AT1G45050 // AT3G55610 // AT3G10870 // AT2G30140 // AT1G01030 // AT1G53160 // AT4G16370 // AT1G23290 // AT1G27950 // AT1G21750 // AT2G40080 // AT4G24960 // AT1G29160 // AT2G27230 // AT2G46690 // AT3G08590 // AT1G51140 // AT4G15910 // AT5G59570 // AT5G33210 // AT1G32…
GO:0071310	P	cellular response to organic substance	30	608	1023	28362	0.057	0.99	// AT1G64380 // AT5G11260 // AT1G53300 // AT3G54030 // AT1G72770 // AT1G01360 // AT2G30020 // AT1G52400 // AT4G28140 // AT2G01150 // AT2G46690 // AT5G33210 // AT2G23340 // AT4G35890 // AT4G26080 // AT2G46680 // AT2G26150 // AT5G57050 // AT4G37790 // AT1G42990 // AT4G36900 // AT1G69260 // AT1G45249 // AT1G71130 // AT3G11410 // AT4G26150 // AT1G07430 // AT4G11890 // AT2G20880 // AT1G28480
GO:0031667	P	response to nutrient levels	8	608	190	28362	0.058	1	// AT1G64660 // AT1G04770 // AT3G47640 // AT5G24660 // AT1G21400 // AT2G41240 // AT3G17810 // AT2G28060
GO:0022622	P	root system development	9	608	484	28362	0.71	1	// AT5G52310 // AT1G51590 // AT2G27230 // AT2G42500 // AT5G56040 // AT2G39800 // AT2G05520 // AT5G52050 // AT5G04340
GO:0009167	P	purine ribonucleoside monophosphate metabolic process	5	608	174	28362	0.32	1	// AT4G30190 // AT3G08590 // AT5G62670 // AT1G22840 // AT2G36580
GO:0051716	P	cellular response to stimulus	73	608	2856	28362	0.069	1	// AT1G64380 // AT5G11260 // AT1G01360 // AT3G08730 // AT1G04770 // AT4G13950 // AT3G54030 // AT5G15840 // AT1G72770 // AT5G24660 // AT2G30020 // AT1G52400 // AT1G45249 // AT4G28140 // AT3G25040 // AT2G15970 // AT2G01150 // AT4G26080 // AT3G54960 // AT1G21750 // AT2G43130 // AT2G40080 // AT5G65270 // AT2G46690 // AT5G15960 // AT4G35040 // AT5G33210 // AT1G16920 // AT1G32870 // AT5G58380 // AT2G23…
GO:0000003	P	reproduction	32	608	1721	28362	0.82	1	// AT3G04620 // AT1G26260 // AT5G15840 // AT1G45050 // AT3G55610 // AT2G30140 // AT1G01030 // AT1G23290 // AT1G21750 // AT2G40080 // AT4G24960 // AT1G29160 // AT1G51140 // AT5G59570 // AT3G12145 // AT5G15470 // AT3G20810 // AT5G37260 // AT5G13200 // AT1G56430 // AT3G04680 // AT4G25640 // AT1G01470 // AT1G25250 // AT5G22290 // AT1G53160 // AT5G01600 // AT4G34710 // AT4G26150 // AT1G07430 // AT5G62…
GO:0000160	P	phosphorelay signal transduction system	6	608	225	28362	0.36	1	// AT4G36900 // AT1G64380 // AT1G71130 // AT2G23340 // AT4G28140 // AT2G20880
GO:0009199	P	ribonucleoside triphosphate metabolic process	5	608	165	28362	0.29	1	// AT4G30190 // AT3G08590 // AT5G62670 // AT1G22840 // AT2G36580
GO:0016192	P	vesicle-mediated transport	7	608	397	28362	0.75	1	// AT2G43130 // AT1G16920 // AT3G09900 // AT1G09330 // AT1G03900 // AT3G25040 // AT5G16300
GO:0019538	P	protein metabolic process	69	608	4289	28362	1	1	// AT3G01170 // AT3G54030 // AT4G33080 // AT3G17000 // AT4G01610 // AT3G08730 // AT5G56150 // AT1G06430 // AT1G45050 // AT4G23050 // AT2G30020 // AT1G70600 // AT4G26080 // AT4G11890 // AT4G04210 // AT2G01150 // AT2G45920 // AT1G54150 // AT1G51590 // AT2G47570 // AT3G09200 // ATCG00020 // AT4G05320 // AT5G58380 // AT3G54130 // AT3G04240 // AT3G02190 // AT1G49620 // AT1G23440 // AT1G08650 // AT1G47…
GO:0009892	P	negative regulation of metabolic process	6	608	521	28362	0.97	1	// AT1G06430 // AT4G34590 // AT1G49620 // AT5G57050 // AT4G04020 // AT4G19700
GO:0009893	P	positive regulation of metabolic process	15	608	535	28362	0.18	1	// AT1G45249 // AT5G11260 // AT5G49330 // AT2G27230 // AT3G61890 // AT1G25250 // AT5G22290 // AT4G34590 // AT3G08730 // AT5G24660 // AT5G05410 // AT2G26150 // AT2G46680 // AT4G27410 // AT3G56290
GO:0009161	P	ribonucleoside monophosphate metabolic process	5	608	191	28362	0.39	1	// AT4G30190 // AT3G08590 // AT5G62670 // AT1G22840 // AT2G36580
GO:0035556	P	intracellular signal transduction	17	608	660	28362	0.26	1	// AT4G36900 // AT2G43130 // AT5G65270 // AT1G64380 // AT1G71130 // AT2G30360 // AT1G16920 // AT3G08730 // AT5G58380 // AT2G23340 // AT3G09900 // AT5G10930 // AT4G13950 // AT1G08650 // AT4G28140 // AT4G13020 // AT2G20880
GO:0000902	P	cell morphogenesis	9	608	402	28362	0.5	1	// AT3G49120 // AT2G42230 // AT1G26770 // AT1G56430 // AT3G55500 // AT1G09330 // AT5G15470 // AT1G69530 // AT2G05520
GO:0006886	P	intracellular protein transport	5	608	350	28362	0.87	1	// AT4G30600 // AT3G17780 // AT5G50460 // AT5G42570 // AT1G16920
GO:0042254	P	ribosome biogenesis	6	608	341	28362	0.74	1	// AT1G77680 // AT4G15770 // AT3G09200 // AT1G55140 // AT1G20015 // AT5G51174
GO:0008643	P	carbohydrate transport	5	608	115	28362	0.11	1	// AT4G32390 // AT2G25520 // AT4G17550 // AT1G67300 // AT5G26340
GO:0071840	P	cellular component organization or biogenesis	52	608	2812	28362	0.88	1	// AT2G38530 // AT1G77680 // AT1G64660 // AT5G65270 // AT5G24020 // AT3G55500 // AT1G06430 // AT5G24660 // AT3G49120 // AT1G52400 // AT3G43270 // AT3G56310 // AT1G04770 // AT4G04210 // AT1G26770 // AT1G54150 // ATCG00250 // AT1G71360 // AT1G56430 // AT4G23630 // AT5G15470 // AT1G64810 // AT2G35940 // AT3G20810 // AT3G29090 // AT5G08290 // AT1G09330 // AT4G30600 // AT4G22880 // AT1G64390 // AT3G09…
GO:0018130	P	heterocycle biosynthetic process	69	608	2957	28362	0.25	1	// AT2G18990 // AT1G64380 // AT5G11260 // AT5G04760 // AT3G61890 // AT3G24520 // AT5G23290 // AT5G15840 // AT1G75410 // AT5G24660 // AT1G32870 // AT3G51960 // AT4G30190 // AT4G28140 // AT1G53160 // AT1G01030 // AT5G41010 // AT1G45249 // AT1G29160 // AT4G09180 // AT1G71130 // AT1G51140 // AT4G35040 // AT5G59570 // AT2G25650 // AT5G59820 // AT2G23340 // AT4G23050 // AT5G66410 // AT4G37790 // AT2G38…
GO:0048316	P	seed development	8	608	661	28362	0.97	1	// AT1G21750 // AT1G29160 // AT1G01470 // AT3G55610 // AT4G34710 // AT1G07430 // AT5G62620 // AT5G13200
GO:0006629	P	lipid metabolic process	17	608	994	28362	0.86	1	// AT1G07720 // AT1G06570 // AT5G45950 // AT4G24220 // AT4G16760 // AT2G04350 // AT1G73680 // AT2G33380 // AT3G45140 // AT1G02660 // AT2G22780 // AT2G30550 // AT2G03760 // AT3G07700 // AT1G02205 // AT1G20560 // AT5G51830
GO:0009308	P	amine metabolic process	5	608	102	28362	0.075	1	// AT4G08870 // AT5G53120 // AT1G56430 // AT4G34710 // AT5G38530
GO:0043412	P	macromolecule modification	50	608	2532	28362	0.75	1	// AT3G28480 // AT3G54030 // AT3G17000 // AT3G08730 // AT5G56150 // AT1G72770 // AT1G45050 // AT2G30020 // AT4G26080 // AT2G01150 // AT2G45920 // AT1G54150 // AT1G51590 // AT1G20015 // AT4G33080 // ATCG00020 // AT4G05320 // AT5G58380 // AT1G49620 // AT3G04240 // AT4G23050 // AT1G08650 // AT3G20810 // AT4G02890 // AT4G11890 // AT2G28060 // AT4G02410 // AT1G77810 // AT3G55920 // AT1G64040 // AT3G05…
GO:0043413	P	macromolecule glycosylation	5	608	101	28362	0.073	1	// AT1G32210 // AT1G51590 // AT3G04240 // AT5G62620 // AT1G77810
GO:0009267	P	cellular response to starvation	6	608	153	28362	0.12	1	// AT1G64660 // AT3G47640 // AT5G24660 // AT1G21400 // AT1G04770 // AT2G41240
GO:0044042	P	glucan metabolic process	6	608	218	28362	0.33	1	// AT1G64390 // AT4G39210 // AT5G15650 // AT5G62220 // AT3G23920 // AT5G51830
GO:0010557	P	positive regulation of macromolecule biosynthetic process	13	608	373	28362	0.065	1	// AT1G45249 // AT5G49330 // AT2G27230 // AT3G61890 // AT5G22290 // AT4G34590 // AT3G08730 // AT5G24660 // AT5G05410 // AT2G26150 // AT2G46680 // AT4G27410 // AT3G56290
GO:0048364	P	root development	9	608	482	28362	0.71	1	// AT5G52310 // AT1G51590 // AT2G27230 // AT2G42500 // AT5G56040 // AT2G39800 // AT2G05520 // AT5G52050 // AT5G04340
GO:0043603	P	cellular amide metabolic process	16	608	1575	28362	1	1	// AT4G08870 // AT3G01170 // AT3G24170 // AT2G47570 // AT3G09200 // AT3G08730 // AT2G40205 // AT3G08520 // ATCG00960 // AT4G34590 // ATCG01170 // AT1G23290 // ATCG00250 // AT1G70600 // AT2G18110 // AT3G02190
GO:0006753	P	nucleoside phosphate metabolic process	6	608	305	28362	0.64	1	// AT2G22570 // AT5G62670 // AT1G22840 // AT4G30190 // AT2G36580 // AT3G08590
GO:0014070	P	response to organic cyclic compound	11	608	405	28362	0.26	1	// AT1G05560 // AT3G54030 // AT3G20470 // AT4G35890 // AT5G37260 // AT1G61340 // AT2G33380 // AT4G05320 // AT2G03760 // AT1G28480 // AT2G05520
GO:0048229	P	gametophyte development	12	608	422	28362	0.2	1	// AT1G67360 // AT4G24960 // AT3G04620 // AT4G25640 // AT4G16760 // AT1G56430 // AT5G15650 // AT2G39800 // AT3G55610 // AT5G15470 // AT2G35940 // AT3G08590
GO:0032446	P	protein modification by small protein conjugation	9	608	550	28362	0.83	1	// AT1G54150 // AT3G12580 // AT3G17000 // AT5G56150 // AT1G45050 // AT2G45920 // AT4G19700 // AT2G01150 // AT3G58040
GO:0009653	P	anatomical structure morphogenesis	15	608	919	28362	0.89	1	// AT3G49120 // AT2G42230 // AT2G27230 // AT1G25250 // AT3G55500 // AT1G56430 // AT5G56040 // AT1G45050 // AT1G09330 // AT5G15470 // AT1G69530 // AT1G01030 // AT1G26770 // AT5G52050 // AT2G05520
GO:0048513	P	animal organ development	11	608	422	28362	0.3	1	// AT4G35890 // AT2G42540 // AT1G73680 // AT1G25250 // AT1G54040 // AT5G52310 // AT1G45050 // AT4G02380 // AT1G01030 // AT5G62620 // AT5G08290
GO:0006873	P	cellular ion homeostasis	6	608	138	28362	0.084	1	// AT5G47560 // AT5G01600 // AT1G66240 // AT5G24030 // AT5G27150 // AT4G16370
GO:0034637	P	cellular carbohydrate biosynthetic process	6	608	219	28362	0.33	1	// AT4G39210 // AT5G20830 // AT5G15650 // AT5G15470 // AT5G62220 // AT5G51830
GO:0044257	P	cellular protein catabolic process	15	608	444	28362	0.062	1	// AT3G17000 // AT4G01610 // AT4G04210 // AT5G56150 // AT1G06430 // AT4G19700 // AT5G60360 // AT1G45050 // AT2G01150 // AT5G01720 // AT1G79110 // AT4G02890 // AT1G47128 // AT3G48350 // AT3G58040
GO:0044255	P	cellular lipid metabolic process	11	608	649	28362	0.82	1	// AT1G07720 // AT1G06570 // AT1G02205 // AT2G04350 // AT1G73680 // AT3G45140 // AT2G22780 // AT4G16760 // AT3G07700 // AT1G20560 // AT5G51830
GO:0010498	P	proteasomal protein catabolic process	5	608	172	28362	0.31	1	// AT4G19700 // AT1G79110 // AT1G45050 // AT4G04210 // AT2G01150
GO:0022402	P	cell cycle process	5	608	370	28362	0.9	1	// AT1G05560 // AT5G66410 // AT1G49620 // AT5G08290 // AT1G78790
GO:0042594	P	response to starvation	6	608	162	28362	0.14	1	// AT1G64660 // AT3G47640 // AT5G24660 // AT1G21400 // AT1G04770 // AT2G41240
GO:0008219	P	cell death	6	608	194	28362	0.24	1	// AT2G38530 // AT1G21750 // AT1G32210 // AT5G22290 // AT1G79110 // AT4G19700
GO:0009733	P	response to auxin	5	608	407	28362	0.94	1	// AT2G46690 // AT5G37260 // AT5G13930 // AT5G13370 // AT5G33210
GO:0009826	P	unidimensional cell growth	8	608	296	28362	0.31	1	// AT3G49120 // AT1G26770 // AT1G56430 // AT3G55500 // AT1G09330 // AT5G15470 // AT1G69530 // AT2G05520
GO:0009735	P	response to cytokinin	8	608	244	28362	0.16	1	// AT1G21750 // AT3G49120 // AT4G39330 // AT3G09200 // AT1G30260 // AT4G37790 // AT5G01600 // AT4G26150
GO:2000112	P	regulation of cellular macromolecule biosynthetic process	59	608	2657	28362	0.41	1	// AT1G64380 // AT5G11260 // AT5G04760 // AT3G61890 // AT3G24520 // AT5G23290 // AT5G15840 // AT1G75410 // AT5G24660 // AT1G32870 // AT3G51960 // AT4G28140 // AT1G53160 // AT1G01030 // AT1G45249 // AT1G29160 // AT4G09180 // AT1G71130 // AT1G51140 // AT4G35040 // AT5G59570 // AT2G25650 // AT5G59820 // AT2G23340 // AT4G23050 // AT4G37790 // AT2G38250 // AT2G35940 // AT3G15790 // AT4G35550 // AT5G49…
GO:0006468	P	protein phosphorylation	16	608	936	28362	0.85	1	// AT4G23050 // AT4G02410 // AT3G54030 // AT5G53450 // AT3G08730 // AT4G33080 // AT5G56040 // AT5G58380 // AT1G49620 // AT5G10930 // AT5G57050 // AT1G08650 // AT4G13020 // AT4G11890 // AT2G30360 // AT2G28060
GO:0019219	P	regulation of nucleobase-containing compound metabolic process	59	608	2529	28362	0.27	1	// AT1G64380 // AT5G11260 // AT5G04760 // AT3G61890 // AT3G24520 // AT5G23290 // AT5G15840 // AT1G75410 // AT5G24660 // AT1G32870 // AT3G51960 // AT4G28140 // AT1G53160 // AT1G01030 // AT1G45249 // AT1G29160 // AT4G09180 // AT1G71130 // AT1G51140 // AT4G35040 // AT5G59570 // AT2G25650 // AT5G59820 // AT2G23340 // AT4G23050 // AT5G16450 // AT2G38250 // AT2G35940 // AT3G15790 // AT4G35550 // AT4G37…
GO:0006461	P	protein complex assembly	6	608	287	28362	0.58	1	// AT1G64660 // AT2G42540 // AT3G17930 // AT1G52400 // AT2G18050 // AT1G78790
GO:0070085	P	glycosylation	5	608	107	28362	0.087	1	// AT1G32210 // AT1G51590 // AT3G04240 // AT5G62620 // AT1G77810
GO:0006464	P	cellular protein modification process	48	608	2126	28362	0.38	1	// AT3G28480 // AT3G54030 // AT3G17000 // AT3G08730 // AT5G56150 // AT1G72770 // AT1G45050 // AT2G30020 // AT4G26080 // AT2G01150 // AT2G45920 // AT1G54150 // AT1G51590 // AT4G33080 // ATCG00020 // AT4G05320 // AT5G58380 // AT1G49620 // AT3G04240 // AT4G23050 // AT1G08650 // AT3G20810 // AT4G02890 // AT4G11890 // AT2G28060 // AT4G02410 // AT1G77810 // AT3G55920 // AT3G05640 // AT5G57050 // AT4G19…
GO:0000272	P	polysaccharide catabolic process	5	608	167	28362	0.29	1	// AT3G43270 // AT1G64390 // AT3G29090 // AT3G49220 // AT3G23920
GO:0006486	P	protein glycosylation	5	608	101	28362	0.073	1	// AT1G32210 // AT1G51590 // AT3G04240 // AT5G62620 // AT1G77810
GO:0048856	P	anatomical structure development	80	608	3146	28362	0.065	1	// AT2G42540 // AT5G11260 // AT1G54040 // AT3G49120 // AT3G04620 // AT3G61890 // AT4G16760 // AT3G55500 // AT5G15840 // AT1G06430 // AT2G39800 // AT1G45050 // AT3G55610 // AT3G10870 // AT2G30140 // AT1G01030 // AT1G53160 // AT4G16370 // AT1G23290 // AT1G27950 // AT1G21750 // AT1G26770 // AT2G40080 // AT4G24960 // AT1G29160 // AT2G27230 // AT2G46690 // AT3G08590 // AT1G51140 // AT4G15910 // AT5G59…
GO:0019693	P	ribose phosphate metabolic process	5	608	245	28362	0.6	1	// AT4G30190 // AT3G08590 // AT5G62670 // AT1G22840 // AT2G36580
GO:0006796	P	phosphate-containing compound metabolic process	38	608	1735	28362	0.47	1	// AT3G54030 // AT4G33080 // AT3G08730 // AT2G18230 // AT1G72770 // AT2G39800 // AT3G55610 // AT2G30020 // AT4G30190 // AT3G08590 // AT3G05640 // AT5G26340 // AT1G71697 // AT2G36580 // AT5G58380 // AT3G11410 // AT4G23050 // AT1G08650 // AT2G28060 // AT4G02410 // AT4G26080 // AT2G22570 // AT5G62670 // AT1G07430 // AT1G22840 // AT5G57050 // AT5G53450 // AT2G25620 // AT5G56040 // AT4G01480 // AT1G49…
GO:0006790	P	sulfur compound metabolic process	10	608	286	28362	0.096	1	// AT5G48180 // AT1G64660 // AT3G24170 // AT1G62180 // AT5G55070 // AT1G54040 // AT4G04610 // AT2G25450 // AT4G21990 // AT3G23810
GO:0006793	P	phosphorus metabolic process	38	608	1751	28362	0.49	1	// AT3G54030 // AT4G33080 // AT3G08730 // AT2G18230 // AT1G72770 // AT2G39800 // AT3G55610 // AT2G30020 // AT4G30190 // AT3G08590 // AT3G05640 // AT5G26340 // AT1G71697 // AT2G36580 // AT5G58380 // AT3G11410 // AT4G23050 // AT1G08650 // AT2G28060 // AT4G02410 // AT4G26080 // AT2G22570 // AT5G62670 // AT1G07430 // AT1G22840 // AT5G57050 // AT5G53450 // AT2G25620 // AT5G56040 // AT4G01480 // AT1G49…
GO:0006412	P	translation	12	608	1500	28362	1	1	// AT3G01170 // AT2G47570 // AT3G09200 // AT3G08730 // AT2G40205 // AT3G08520 // AT4G34590 // AT1G23290 // ATCG00250 // AT1G70600 // AT2G18110 // AT3G02190
GO:0048523	P	negative regulation of cellular process	12	608	594	28362	0.62	1	// AT4G24960 // AT4G26080 // AT3G11410 // AT1G32210 // AT1G06430 // AT4G34590 // AT3G08730 // AT1G49620 // AT5G57050 // AT1G07430 // AT4G04020 // AT4G19700
GO:0048522	P	positive regulation of cellular process	20	608	676	28362	0.099	1	// AT1G45249 // AT2G26150 // AT3G20470 // AT2G27230 // AT3G61890 // AT1G53300 // AT1G25250 // AT5G22290 // AT4G27410 // AT4G34590 // AT3G08730 // AT5G24660 // AT5G05410 // AT1G32870 // AT1G52400 // AT1G07430 // AT2G46680 // AT3G56290 // AT2G01150 // AT5G49330
GO:2000241	P	regulation of reproductive process	10	608	266	28362	0.067	1	// AT2G40080 // AT1G26260 // AT5G37260 // AT5G22290 // AT5G15840 // AT1G45050 // AT5G59570 // AT4G26150 // AT1G07430 // AT2G30140
GO:0007165	P	signal transduction	52	608	1965	28362	0.073	1	// AT1G64380 // AT5G11260 // AT5G65270 // AT3G08730 // AT4G13950 // AT3G54030 // AT5G15840 // AT1G72770 // AT1G01360 // AT2G30020 // AT1G52400 // AT4G28140 // AT3G25040 // AT2G01150 // AT4G26080 // AT2G43130 // AT2G40080 // AT2G46690 // AT5G15960 // AT5G33210 // AT1G16920 // AT1G32870 // AT5G58380 // AT2G23340 // AT4G23050 // AT1G08650 // AT4G35890 // AT2G37970 // AT2G46680 // AT3G22370 // AT3G09…
GO:0031347	P	regulation of defense response	7	608	233	28362	0.24	1	// AT3G49120 // AT2G25620 // AT4G11890 // AT5G24660 // AT3G25040 // AT4G19700 // AT1G51090
GO:0042445	P	hormone metabolic process	5	608	152	28362	0.23	1	// AT5G33210 // AT1G25250 // AT3G44310 // AT3G10870 // AT2G03760
GO:0044092	P	negative regulation of molecular function	5	608	112	28362	0.1	1	// AT3G47380 // AT4G01026 // AT1G49620 // AT4G19700 // AT5G57050
GO:0033036	P	macromolecule localization	15	608	996	28362	0.94	1	// AT4G30600 // AT3G17780 // AT5G59310 // AT5G42570 // AT5G65270 // AT5G50460 // AT2G38530 // AT1G27950 // AT1G16920 // AT4G27840 // AT1G55690 // AT3G09900 // AT1G09330 // AT3G25040 // AT4G16370
GO:0046034	P	ATP metabolic process	5	608	148	28362	0.22	1	// AT4G30190 // AT3G08590 // AT5G62670 // AT1G22840 // AT2G36580
GO:2001141	P	regulation of RNA biosynthetic process	58	608	2445	28362	0.23	1	// AT1G64380 // AT5G11260 // AT5G04760 // AT3G61890 // AT3G24520 // AT5G23290 // AT5G15840 // AT1G75410 // AT5G24660 // AT1G32870 // AT3G51960 // AT4G28140 // AT1G53160 // AT1G01030 // AT1G45249 // AT1G29160 // AT4G09180 // AT1G71130 // AT1G51140 // AT4G35040 // AT5G59570 // AT2G25650 // AT5G59820 // AT2G23340 // AT4G23050 // AT4G37790 // AT2G38250 // AT2G35940 // AT3G15790 // AT4G35550 // AT5G49…
GO:1901566	P	organonitrogen compound biosynthetic process	37	608	2076	28362	0.89	1	// AT2G18990 // AT3G01170 // AT1G64660 // AT1G62180 // AT2G47570 // AT3G08730 // ATCG00960 // AT3G57020 // AT2G39800 // AT3G55610 // AT4G30190 // AT1G70600 // AT1G17745 // AT1G23290 // AT3G09200 // AT1G56430 // AT3G02190 // ATCG00250 // AT5G38530 // AT5G48180 // AT2G22570 // AT5G66410 // AT2G40205 // AT3G08520 // AT5G62670 // AT2G18110 // AT5G53120 // AT3G17810 // AT4G08870 // AT4G04610 // AT5G14…
GO:0044249	P	cellular biosynthetic process	130	608	5870	28362	0.36	1	// AT1G64380 // AT5G11260 // AT4G16760 // AT1G64660 // AT2G33380 // AT4G37790 // AT2G25450 // AT3G55610 // AT4G30190 // AT4G28140 // AT3G02190 // AT2G27230 // AT1G51140 // AT5G59570 // AT5G33210 // AT1G26260 // AT5G62220 // AT3G04240 // AT2G35940 // AT1G42990 // AT5G20830 // AT1G77810 // AT5G62670 // AT3G47640 // AT3G23820 // AT5G53120 // AT2G40970 // AT5G04340 // AT4G36900 // AT1G13280 // AT4G26…
GO:0016567	P	protein ubiquitination	9	608	526	28362	0.79	1	// AT1G54150 // AT3G12580 // AT3G17000 // AT5G56150 // AT1G45050 // AT2G45920 // AT4G19700 // AT2G01150 // AT3G58040
GO:0023052	P	signaling	52	608	1997	28362	0.09	1	// AT1G64380 // AT5G11260 // AT5G65270 // AT3G08730 // AT4G13950 // AT3G54030 // AT5G15840 // AT1G72770 // AT1G01360 // AT2G30020 // AT1G52400 // AT4G28140 // AT3G25040 // AT2G01150 // AT4G26080 // AT2G43130 // AT2G40080 // AT2G46690 // AT5G15960 // AT5G33210 // AT1G16920 // AT1G32870 // AT5G58380 // AT2G23340 // AT4G23050 // AT1G08650 // AT4G35890 // AT2G37970 // AT2G46680 // AT3G22370 // AT3G09…
GO:0006807	P	nitrogen compound metabolic process	128	608	6241	28362	0.73	1	// AT1G64380 // AT5G11260 // AT2G39020 // AT1G64660 // AT4G37790 // AT3G55610 // AT3G10870 // AT4G30190 // AT4G28140 // AT3G08590 // AT3G02190 // AT2G27230 // AT1G51140 // AT5G59570 // AT1G26260 // AT1G55140 // AT5G16450 // AT1G64810 // AT2G35940 // AT5G08290 // AT1G42990 // AT5G62670 // AT3G47640 // AT3G23820 // AT5G53120 // AT2G40970 // AT5G04340 // AT4G36900 // AT3G04680 // AT4G26150 // AT2G18…
GO:0009123	P	nucleoside monophosphate metabolic process	5	608	196	28362	0.41	1	// AT4G30190 // AT3G08590 // AT5G62670 // AT1G22840 // AT2G36580
GO:0034660	P	ncRNA metabolic process	5	608	337	28362	0.85	1	// AT1G77680 // AT3G04680 // AT1G20015 // AT5G51174 // AT1G55140
GO:0044267	P	cellular protein metabolic process	67	608	3841	28362	0.97	1	// AT3G01170 // AT3G54030 // AT4G33080 // AT3G17000 // AT4G01610 // AT3G08730 // AT5G56150 // AT1G06430 // AT1G45050 // AT4G23050 // AT2G30020 // AT1G70600 // AT4G26080 // AT4G11890 // AT4G04210 // AT2G01150 // AT2G45920 // AT1G54150 // AT1G51590 // AT2G47570 // AT3G09200 // ATCG00020 // AT4G05320 // AT5G58380 // AT3G54130 // AT3G04240 // AT3G02190 // AT1G49620 // ATCG00250 // AT1G08650 // AT1G47…
GO:0044264	P	cellular polysaccharide metabolic process	7	608	273	28362	0.37	1	// AT1G64390 // AT4G39210 // AT5G15650 // AT5G15470 // AT5G62220 // AT3G23920 // AT5G51830
GO:0051186	P	cofactor metabolic process	8	608	389	28362	0.6	1	// AT1G06570 // AT2G22570 // AT5G55070 // AT2G36580 // AT4G26150 // AT1G19670 // AT3G08590 // AT3G23810
GO:0044262	P	cellular carbohydrate metabolic process	10	608	407	28362	0.38	1	// AT1G64390 // AT4G39210 // AT5G20830 // AT5G15650 // AT2G25450 // AT2G22780 // AT5G15470 // AT5G62220 // AT3G23920 // AT5G51830
GO:0044260	P	cellular macromolecule metabolic process	139	608	7410	28362	0.97	1	// AT1G64380 // AT5G11260 // AT4G37790 // AT4G28140 // AT4G04210 // AT2G01150 // AT2G45920 // AT1G54150 // AT2G27230 // AT1G51140 // ATCG00020 // AT5G59570 // AT1G26260 // AT1G55140 // AT5G62220 // AT1G64810 // AT2G35940 // AT3G20810 // AT5G08290 // AT1G64390 // AT1G77810 // AT3G55920 // AT3G47640 // AT5G57050 // AT2G40970 // AT4G19700 // AT5G04340 // AT4G36900 // AT3G04680 // AT5G60360 // AT3G16…
GO:0007049	P	cell cycle	6	608	558	28362	0.98	1	// AT1G05560 // AT1G49620 // AT5G66410 // AT1G78790 // AT5G08290 // AT5G53450
GO:0006366	P	transcription from RNA polymerase II promoter	5	608	380	28362	0.91	1	// AT5G49330 // AT1G07950 // AT1G51140 // AT2G41240 // AT4G09180
GO:0090351	P	seedling development	7	608	177	28362	0.094	1	// AT1G20450 // AT5G37260 // AT4G26150 // AT1G07430 // AT2G43820 // AT3G06500 // AT5G13200
GO:0000271	P	polysaccharide biosynthetic process	5	608	202	28362	0.44	1	// AT4G39210 // AT5G62220 // AT5G15650 // AT5G15470 // AT5G51830
GO:0050790	P	regulation of catalytic activity	7	608	213	28362	0.18	1	// AT4G01026 // AT4G01610 // AT3G47380 // AT1G49620 // AT5G57050 // AT4G19700 // AT2G28060
GO:0009889	P	regulation of biosynthetic process	63	608	2752	28362	0.31	1	// AT1G64380 // AT5G11260 // AT5G04760 // AT3G61890 // AT3G24520 // AT5G23290 // AT5G15840 // AT1G75410 // AT2G25450 // AT5G24660 // AT1G32870 // AT3G51960 // AT4G28140 // AT1G53160 // AT1G01030 // AT1G45249 // AT1G29160 // AT4G09180 // AT1G71130 // AT1G51140 // AT4G35040 // AT5G59570 // AT2G25650 // AT5G59820 // AT2G23340 // AT5G13930 // AT4G23050 // AT4G37790 // AT2G22780 // AT2G35940 // AT3G15…
GO:0042545	P	cell wall modification	6	608	156	28362	0.13	1	// AT1G26770 // AT3G55500 // AT3G43270 // AT1G69530 // AT3G29090 // AT3G49220
GO:0008652	P	cellular amino acid biosynthetic process	6	608	132	28362	0.071	1	// AT1G64660 // AT5G14800 // AT2G39800 // AT3G55610 // ATCG00250 // AT1G17745
GO:0006511	P	ubiquitin-dependent protein catabolic process	10	608	376	28362	0.29	1	// AT3G17000 // AT4G04210 // AT5G56150 // AT1G45050 // AT5G01720 // AT4G02890 // AT1G79110 // AT4G19700 // AT2G01150 // AT3G58040
GO:0006518	P	peptide metabolic process	15	608	1540	28362	1	1	// AT3G01170 // AT3G24170 // AT2G47570 // AT3G09200 // AT3G08730 // AT2G40205 // AT3G08520 // ATCG00960 // AT4G34590 // ATCG01170 // AT1G23290 // ATCG00250 // AT1G70600 // AT2G18110 // AT3G02190
GO:0051171	P	regulation of nitrogen compound metabolic process	61	608	2739	28362	0.4	1	// AT1G64380 // AT5G11260 // AT5G04760 // AT3G61890 // AT3G24520 // AT5G23290 // AT5G15840 // AT1G75410 // AT5G24660 // AT1G32870 // AT3G51960 // AT4G28140 // AT1G53160 // AT1G01030 // AT1G45249 // AT1G29160 // AT4G09180 // AT1G71130 // AT1G51140 // AT4G35040 // AT5G59570 // AT2G25650 // AT5G59820 // AT2G23340 // AT4G23050 // AT5G16450 // AT2G38250 // AT2G35940 // AT3G15790 // AT4G35550 // AT4G37…
GO:0006631	P	fatty acid metabolic process	9	608	252	28362	0.1	1	// AT1G07720 // AT1G02205 // AT2G04350 // AT1G73680 // AT3G45140 // AT2G22780 // AT4G16760 // AT1G20560 // AT5G51830
GO:0071482	P	cellular response to light stimulus	6	608	130	28362	0.067	1	// AT5G11260 // AT2G40080 // AT2G42540 // AT2G37970 // AT5G15960 // AT5G15840
GO:0070271	P	protein complex biogenesis	6	608	294	28362	0.6	1	// AT1G64660 // AT2G42540 // AT3G17930 // AT1G52400 // AT2G18050 // AT1G78790
GO:0006732	P	coenzyme metabolic process	6	608	264	28362	0.5	1	// AT1G06570 // AT5G55070 // AT2G22570 // AT2G36580 // AT3G08590 // AT3G23810
GO:0051649	P	establishment of localization in cell	6	608	488	28362	0.95	1	// AT4G30600 // AT3G17780 // AT5G42570 // AT5G50460 // AT1G64500 // AT1G16920
GO:0006457	P	protein folding	9	608	247	28362	0.092	1	// AT3G54960 // AT1G21750 // AT5G23290 // AT3G12580 // AT1G74250 // AT3G55920 // AT3G09440 // AT5G03030 // AT1G12060
GO:0009259	P	ribonucleotide metabolic process	5	608	221	28362	0.52	1	// AT4G30190 // AT3G08590 // AT5G62670 // AT1G22840 // AT2G36580
GO:0071478	P	cellular response to radiation	6	608	135	28362	0.077	1	// AT5G11260 // AT2G40080 // AT2G42540 // AT2G37970 // AT5G15960 // AT5G15840
GO:0051241	P	negative regulation of multicellular organismal process	5	608	119	28362	0.12	1	// AT1G07430 // AT1G45050 // AT5G62620 // AT5G22290 // AT4G26150
GO:0051246	P	regulation of protein metabolic process	6	608	376	28362	0.82	1	// AT3G08730 // AT4G34590 // AT1G49620 // AT5G57050 // AT4G19700 // AT2G28060
GO:0051179	P	localization	65	608	2517	28362	0.072	1	// AT2G38530 // AT5G02270 // AT5G59310 // AT5G65270 // AT1G11960 // AT4G17550 // AT4G38250 // AT5G18290 // AT5G65990 // AT1G79260 // AT1G61890 // AT4G30190 // AT3G25040 // AT4G16370 // AT1G19570 // AT2G37180 // AT2G43130 // AT2G16510 // AT1G58360 // AT1G27950 // AT1G56430 // AT2G37170 // AT5G52450 // AT5G55290 // AT5G13930 // AT1G09330 // AT4G00430 // AT1G67300 // AT1G68570 // AT5G16300 // AT5G01…
GO:0048827	P	phyllome development	15	608	508	28362	0.14	1	// AT4G35890 // AT3G04680 // AT4G25640 // AT1G73680 // AT1G25250 // AT1G54040 // AT2G42540 // AT5G52310 // AT1G45050 // AT5G01600 // AT4G02380 // AT5G27150 // AT1G01030 // AT5G62620 // AT5G08290
GO:0051641	P	cellular localization	8	608	601	28362	0.94	1	// AT4G30600 // AT3G17780 // AT5G42570 // AT5G50460 // AT1G64500 // AT1G16920 // AT5G01600 // AT3G25040
GO:0048608	P	reproductive structure development	28	608	1265	28362	0.46	1	// AT1G26260 // AT5G15840 // AT1G45050 // AT3G55610 // AT2G30140 // AT1G01030 // AT1G23290 // AT1G21750 // AT2G40080 // AT4G24960 // AT1G29160 // AT1G51140 // AT5G59570 // AT3G12145 // AT3G20810 // AT5G37260 // AT5G13200 // AT3G04680 // AT4G25640 // AT1G01470 // AT1G25250 // AT5G22290 // AT1G53160 // AT5G01600 // AT4G34710 // AT4G26150 // AT1G07430 // AT5G62620
GO:1901137	P	carbohydrate derivative biosynthetic process	9	608	329	28362	0.28	1	// AT2G18990 // AT1G51590 // AT1G77810 // AT1G32210 // AT5G62670 // AT3G04240 // AT5G66410 // AT4G30190 // AT5G62620
GO:1901135	P	carbohydrate derivative metabolic process	18	608	645	28362	0.16	1	// AT2G18990 // AT1G51590 // AT1G77810 // AT3G04240 // AT1G32210 // AT3G08590 // AT2G01670 // AT2G36580 // AT5G66410 // AT3G23820 // AT1G22840 // AT1G52400 // AT4G30190 // AT3G03640 // AT5G62670 // AT5G15650 // AT5G62620 // AT3G23810
GO:0033692	P	cellular polysaccharide biosynthetic process	5	608	171	28362	0.31	1	// AT4G39210 // AT5G62220 // AT5G15650 // AT5G15470 // AT5G51830
GO:1902680	P	positive regulation of RNA biosynthetic process	12	608	348	28362	0.079	1	// AT1G45249 // AT5G49330 // AT2G27230 // AT3G61890 // AT5G22290 // AT4G34590 // AT2G26150 // AT5G24660 // AT5G05410 // AT2G46680 // AT4G27410 // AT3G56290
GO:0048731	P	system development	45	608	1929	28362	0.3	1	// AT1G26260 // AT5G15840 // AT1G54040 // AT2G39800 // AT1G45050 // AT3G55610 // AT3G10870 // AT2G30140 // AT1G01030 // AT1G53160 // AT1G23290 // AT1G21750 // AT2G40080 // AT4G24960 // AT1G29160 // AT2G27230 // AT1G51140 // AT5G59570 // AT2G42540 // AT4G02380 // AT3G12145 // AT3G20810 // AT5G08290 // AT2G05520 // AT4G35890 // AT5G37260 // AT1G73680 // AT1G51590 // AT5G27150 // AT5G52050 // AT5G13…
GO:0061458	P	reproductive system development	28	608	1265	28362	0.46	1	// AT1G26260 // AT5G15840 // AT1G45050 // AT3G55610 // AT2G30140 // AT1G01030 // AT1G23290 // AT1G21750 // AT2G40080 // AT4G24960 // AT1G29160 // AT1G51140 // AT5G59570 // AT3G12145 // AT3G20810 // AT5G37260 // AT5G13200 // AT3G04680 // AT4G25640 // AT1G01470 // AT1G25250 // AT5G22290 // AT1G53160 // AT5G01600 // AT4G34710 // AT4G26150 // AT1G07430 // AT5G62620
GO:0034622	P	cellular macromolecular complex assembly	6	608	365	28362	0.79	1	// AT3G17930 // AT4G15770 // AT1G52400 // AT2G18050 // AT5G08290 // AT1G78790
GO:0072521	P	purine-containing compound metabolic process	6	608	233	28362	0.39	1	// AT5G62670 // AT1G22840 // AT4G30190 // AT2G36580 // AT3G08590 // AT3G23810
GO:0009100	P	glycoprotein metabolic process	5	608	107	28362	0.087	1	// AT1G32210 // AT1G51590 // AT3G04240 // AT5G62620 // AT1G77810
GO:0009101	P	glycoprotein biosynthetic process	5	608	102	28362	0.075	1	// AT1G32210 // AT1G51590 // AT3G04240 // AT5G62620 // AT1G77810
GO:0072330	P	monocarboxylic acid biosynthetic process	9	608	251	28362	0.099	1	// AT1G07720 // AT1G02205 // AT2G04350 // AT3G45140 // AT1G13280 // AT3G23820 // AT3G44310 // AT4G16760 // AT5G51830
GO:0045935	P	positive regulation of nucleobase-containing compound metabolic process	12	608	379	28362	0.12	1	// AT1G45249 // AT5G49330 // AT2G27230 // AT3G61890 // AT5G22290 // AT4G34590 // AT2G26150 // AT5G24660 // AT5G05410 // AT2G46680 // AT4G27410 // AT3G56290
GO:0010817	P	regulation of hormone levels	7	608	251	28362	0.3	1	// AT3G44310 // AT1G25250 // AT5G33210 // AT5G13930 // AT4G36760 // AT3G10870 // AT2G03760
GO:0022414	P	reproductive process	32	608	1715	28362	0.81	1	// AT3G04620 // AT1G26260 // AT5G15840 // AT1G45050 // AT3G55610 // AT2G30140 // AT1G01030 // AT1G23290 // AT1G21750 // AT2G40080 // AT4G24960 // AT1G29160 // AT1G51140 // AT5G59570 // AT3G12145 // AT5G15470 // AT3G20810 // AT5G37260 // AT5G13200 // AT1G56430 // AT3G04680 // AT4G25640 // AT1G01470 // AT1G25250 // AT5G22290 // AT1G53160 // AT5G01600 // AT4G34710 // AT4G26150 // AT1G07430 // AT5G62…
GO:0008610	P	lipid biosynthetic process	7	608	522	28362	0.93	1	// AT1G07720 // AT1G06570 // AT1G02205 // AT2G04350 // AT2G33380 // AT3G07700 // AT5G51830
GO:0006996	P	organelle organization	27	608	1335	28362	0.65	1	// AT5G24020 // AT1G06430 // AT5G24660 // AT1G52400 // AT1G04770 // AT4G04210 // AT1G54150 // AT1G09330 // ATCG00250 // AT1G64810 // AT2G35940 // AT3G20810 // AT5G08290 // AT4G23630 // AT1G05560 // AT4G22880 // AT1G67360 // AT5G66410 // AT1G64500 // AT2G16700 // AT2G18050 // AT3G56290 // AT2G42540 // AT4G15770 // AT1G71360 // AT3G16800 // AT1G78790
GO:0005975	P	carbohydrate metabolic process	30	608	1144	28362	0.16	1	// AT1G11840 // AT5G20830 // AT2G25450 // AT3G17940 // AT1G52400 // AT3G43270 // AT3G56310 // AT3G08590 // AT1G51590 // AT4G39210 // AT2G36580 // AT3G04240 // AT5G15470 // AT5G62220 // AT3G03640 // AT3G29090 // AT2G28060 // AT1G64390 // AT1G77810 // AT3G57260 // AT5G15650 // AT3G15350 // AT3G23920 // AT5G51830 // AT1G32210 // AT3G06500 // AT1G56600 // AT2G22780 // AT5G62620 // AT3G49220
GO:0005976	P	polysaccharide metabolic process	10	608	432	28362	0.45	1	// AT1G64390 // AT4G39210 // AT5G15650 // AT3G43270 // AT5G15470 // AT5G62220 // AT3G29090 // AT3G49220 // AT3G23920 // AT5G51830
GO:0044237	P	cellular metabolic process	224	608	9879	28362	0.16	1	// AT1G64380 // AT5G11260 // AT2G39020 // AT5G53120 // AT1G64660 // AT2G33380 // AT4G37790 // AT2G25450 // AT3G55610 // AT3G10870 // AT4G30190 // AT4G28140 // AT4G05320 // AT4G04210 // AT2G01150 // AT2G45920 // AT1G54150 // AT4G04610 // AT2G27230 // AT3G21780 // AT1G51140 // ATCG00020 // AT5G59570 // AT5G33210 // AT1G26260 // AT1G55140 // AT5G16450 // AT1G64810 // AT2G35940 // AT3G20810 // AT5G08…
GO:0044403	P	symbiosis, encompassing mutualism through parasitism	6	608	151	28362	0.11	1	// AT3G49120 // AT3G12580 // AT2G25620 // AT3G61890 // AT3G09440 // AT1G19570
GO:0006396	P	RNA processing	8	608	693	28362	0.98	1	// AT1G77680 // AT3G04680 // AT3G22330 // AT1G55140 // AT1G64810 // AT1G20015 // AT5G08290 // AT5G51174
GO:0019222	P	regulation of metabolic process	74	608	3181	28362	0.25	1	// AT1G64380 // AT5G11260 // AT5G04760 // AT3G61890 // AT3G24520 // AT5G23290 // AT5G15840 // AT1G06430 // AT2G25450 // AT5G24660 // AT1G32870 // AT3G51960 // AT5G57050 // AT1G53160 // AT4G28140 // AT1G45249 // AT2G40970 // AT1G64810 // AT1G29160 // AT4G09180 // AT1G71130 // AT3G56290 // AT1G51140 // AT5G05410 // AT5G59570 // AT4G27410 // AT5G59820 // AT2G23340 // AT5G13930 // AT4G23050 // AT5G16…
GO:0048585	P	negative regulation of response to stimulus	6	608	169	28362	0.16	1	// AT4G26080 // AT5G57050 // AT3G11410 // AT3G51960 // AT1G07430 // AT1G51090
GO:0008104	P	protein localization	12	608	715	28362	0.84	1	// AT4G30600 // AT3G17780 // AT5G42570 // AT5G65270 // AT5G50460 // AT1G16920 // AT4G27840 // AT1G55690 // AT3G09900 // AT1G09330 // AT3G25040 // AT4G16370
GO:1901362	P	organic cyclic compound biosynthetic process	76	608	3174	28362	0.17	1	// AT2G18990 // AT1G64380 // AT5G11260 // AT5G04760 // AT3G61890 // AT3G24520 // AT5G23290 // AT5G15840 // AT1G75410 // AT5G24660 // AT1G32870 // AT3G51960 // AT4G30190 // AT1G45249 // AT4G28140 // AT1G53160 // AT1G01030 // AT2G23910 // AT5G41010 // AT4G34230 // AT4G39330 // AT1G29160 // AT4G09180 // AT1G71130 // AT1G51140 // AT4G35040 // AT5G59570 // AT2G25650 // AT5G59820 // AT2G23340 // AT5G13…
GO:1901360	P	organic cyclic compound metabolic process	100	608	4700	28362	0.55	1	// AT1G64380 // AT5G11260 // AT4G37790 // AT3G10870 // AT4G30190 // AT4G28140 // AT3G08590 // AT3G23810 // AT2G27230 // AT1G51140 // AT5G59570 // AT3G61890 // AT2G03760 // AT5G16450 // AT1G64810 // AT2G35940 // AT5G08290 // AT1G42990 // AT5G62670 // AT2G26150 // AT3G23820 // AT2G40970 // AT5G04340 // AT4G36900 // AT3G04680 // AT4G26150 // AT2G18990 // AT5G23290 // AT3G21560 // AT3G51960 // AT2G23…
GO:1901361	P	organic cyclic compound catabolic process	6	608	183	28362	0.21	1	// AT1G77680 // AT1G06570 // AT5G36160 // AT2G01670 // AT1G19670 // AT3G17810
GO:0009966	P	regulation of signal transduction	9	608	227	28362	0.062	1	// AT5G11260 // AT4G26080 // AT4G11890 // AT5G57050 // AT3G11410 // AT1G53300 // AT1G07430 // AT1G52400 // AT2G01150
GO:0048869	P	cellular developmental process	15	608	1001	28362	0.94	1	// AT3G49120 // AT2G42230 // AT5G49330 // AT3G04620 // AT2G42500 // AT4G26150 // AT3G55500 // AT5G15840 // AT1G26770 // AT1G56430 // AT1G09330 // AT5G15470 // AT1G69530 // AT2G35940 // AT2G05520
GO:0009845	P	seed germination	7	608	161	28362	0.065	1	// AT1G20450 // AT5G37260 // AT4G26150 // AT1G07430 // AT2G43820 // AT3G06500 // AT5G13200
GO:0006073	P	cellular glucan metabolic process	6	608	218	28362	0.33	1	// AT1G64390 // AT4G39210 // AT5G15650 // AT5G62220 // AT3G23920 // AT5G51830
GO:0048519	P	negative regulation of biological process	20	608	848	28362	0.37	1	// AT3G05640 // AT4G24960 // AT4G26080 // AT3G11410 // AT1G32210 // AT4G19700 // AT4G26150 // AT3G51960 // AT5G22290 // AT1G06430 // AT4G34590 // AT3G08730 // AT1G49620 // AT1G45050 // AT3G16800 // AT5G57050 // AT1G07430 // AT4G04020 // AT5G62620 // AT1G51090
GO:0034470	P	ncRNA processing	5	608	271	28362	0.69	1	// AT1G77680 // AT3G04680 // AT1G20015 // AT5G51174 // AT1G55140
GO:0045184	P	establishment of protein localization	12	608	661	28362	0.76	1	// AT4G30600 // AT3G17780 // AT5G42570 // AT5G65270 // AT5G50460 // AT1G16920 // AT4G27840 // AT1G55690 // AT3G09900 // AT1G09330 // AT3G25040 // AT4G16370
GO:0003006	P	developmental process involved in reproduction	31	608	1496	28362	0.6	1	// AT3G04620 // AT1G26260 // AT5G15840 // AT1G45050 // AT3G55610 // AT2G30140 // AT1G01030 // AT1G23290 // AT1G21750 // AT2G40080 // AT4G24960 // AT1G29160 // AT1G51140 // AT5G59570 // AT3G12145 // AT5G15470 // AT3G20810 // AT5G37260 // AT5G13200 // AT1G56430 // AT3G04680 // AT4G25640 // AT1G01470 // AT1G25250 // AT5G22290 // AT1G53160 // AT5G01600 // AT4G34710 // AT4G26150 // AT1G07430 // AT5G62…
GO:0044700	P	single organism signaling	52	608	1995	28362	0.089	1	// AT1G64380 // AT5G11260 // AT5G65270 // AT3G08730 // AT4G13950 // AT3G54030 // AT5G15840 // AT1G72770 // AT1G01360 // AT2G30020 // AT1G52400 // AT4G28140 // AT3G25040 // AT2G01150 // AT4G26080 // AT2G43130 // AT2G40080 // AT2G46690 // AT5G15960 // AT5G33210 // AT1G16920 // AT1G32870 // AT5G58380 // AT2G23340 // AT4G23050 // AT1G08650 // AT4G35890 // AT2G37970 // AT2G46680 // AT3G22370 // AT3G09…
GO:0044702	P	single organism reproductive process	30	608	1544	28362	0.73	1	// AT3G04620 // AT1G26260 // AT5G15840 // AT1G45050 // AT3G55610 // AT2G30140 // AT1G01030 // AT1G23290 // AT1G21750 // AT2G40080 // AT4G24960 // AT1G29160 // AT5G59570 // AT5G15470 // AT3G20810 // AT5G37260 // AT5G13200 // AT1G56430 // AT3G04680 // AT4G25640 // AT1G01470 // AT1G25250 // AT5G22290 // AT1G53160 // AT5G01600 // AT4G34710 // AT4G26150 // AT1G07430 // AT5G62620 // AT1G78790
GO:1901564	P	organonitrogen compound metabolic process	54	608	2569	28362	0.58	1	// AT2G18990 // AT3G01170 // AT1G64660 // AT3G24170 // AT1G62180 // AT2G47570 // AT3G08730 // AT5G36160 // AT2G01670 // AT3G57020 // AT2G39800 // AT3G55610 // AT3G10870 // AT4G30190 // AT1G70600 // AT1G17745 // AT3G08590 // AT1G23290 // AT2G39020 // AT4G33150 // AT3G09200 // AT1G56430 // AT2G36580 // AT3G02190 // ATCG00250 // AT1G19670 // AT2G43820 // AT5G38530 // AT1G05560 // AT5G48180 // AT1G06…
GO:0044707	P	single-multicellular organism process	74	608	2875	28362	0.06	1	// AT2G42540 // AT5G11260 // AT1G54040 // AT3G04620 // AT3G61890 // AT4G16760 // AT1G67360 // AT5G15840 // AT1G06430 // AT2G39800 // AT1G45050 // AT3G55610 // AT3G10870 // AT2G30140 // AT1G01030 // AT1G53160 // AT4G16370 // AT1G23290 // AT1G27950 // AT1G21750 // AT2G40080 // AT4G24960 // AT1G29160 // AT2G27230 // AT2G46690 // AT3G08590 // AT1G51140 // AT4G15910 // AT5G59570 // AT5G33210 // AT1G32…
GO:0016052	P	carbohydrate catabolic process	7	608	257	28362	0.32	1	// AT1G64390 // AT3G29090 // AT2G36580 // AT3G43270 // AT3G08590 // AT3G49220 // AT3G23920
GO:0016051	P	carbohydrate biosynthetic process	9	608	342	28362	0.32	1	// AT1G56600 // AT4G39210 // AT5G20830 // AT5G15650 // AT2G25450 // AT3G15350 // AT5G15470 // AT5G62220 // AT5G51830
GO:0002376	P	immune system process	7	608	369	28362	0.68	1	// AT1G42990 // AT3G49120 // AT2G25620 // AT5G22290 // AT3G57260 // AT5G60360 // AT3G25040
GO:0033554	P	cellular response to stress	18	608	858	28362	0.57	1	// AT1G42990 // AT3G54960 // AT1G64660 // AT1G21750 // AT1G32870 // AT1G04770 // AT1G29395 // AT3G07700 // AT5G22290 // AT4G34590 // AT3G47640 // AT5G24660 // AT1G21400 // AT2G26150 // AT4G02380 // AT2G41240 // AT2G15970 // AT1G78790
GO:0019637	P	organophosphate metabolic process	6	608	524	28362	0.97	1	// AT2G22570 // AT5G62670 // AT1G22840 // AT4G30190 // AT2G36580 // AT3G08590
GO:0022607	P	cellular component assembly	10	608	586	28362	0.8	1	// AT1G05560 // AT1G64660 // AT2G42540 // AT4G15770 // AT3G17930 // AT1G64500 // AT1G52400 // AT2G18050 // AT5G08290 // AT1G78790
GO:0009141	P	nucleoside triphosphate metabolic process	5	608	170	28362	0.31	1	// AT4G30190 // AT3G08590 // AT5G62670 // AT1G22840 // AT2G36580
GO:0009144	P	purine nucleoside triphosphate metabolic process	5	608	157	28362	0.25	1	// AT4G30190 // AT3G08590 // AT5G62670 // AT1G22840 // AT2G36580
GO:0009723	P	response to ethylene	10	608	307	28362	0.13	1	// AT4G36900 // AT5G60360 // AT1G64380 // AT1G71130 // AT5G37260 // AT2G23340 // AT4G02380 // AT4G28140 // AT2G20880 // AT2G05520
GO:0097659	P	nucleic acid-templated transcription	59	608	2561	28362	0.3	1	// AT1G64380 // AT5G11260 // AT5G04760 // AT3G61890 // AT3G24520 // AT5G23290 // AT5G15840 // AT1G75410 // AT5G24660 // AT1G32870 // AT3G51960 // AT4G28140 // AT1G53160 // AT1G01030 // AT5G41010 // AT1G45249 // AT1G29160 // AT4G09180 // AT1G71130 // AT1G51140 // AT4G35040 // AT5G59570 // AT2G25650 // AT5G59820 // AT2G23340 // AT4G23050 // AT4G37790 // AT2G38250 // AT2G35940 // AT3G15790 // AT4G35…
GO:0071669	P	plant-type cell wall organization or biogenesis	6	608	256	28362	0.47	1	// AT1G05560 // AT1G26770 // AT3G55500 // AT5G15650 // AT5G15470 // AT1G69530
GO:0006812	P	cation transport	12	608	362	28362	0.098	1	// AT3G15352 // AT2G16510 // AT1G35720 // AT5G47560 // AT4G30190 // AT5G55290 // AT5G01600 // AT1G66240 // AT1G07430 // AT5G27150 // AT4G16370 // AT2G22500
GO:0099402	P	plant organ development	23	608	961	28362	0.33	1	// AT2G39800 // AT1G45050 // AT5G27150 // AT1G01030 // AT1G51590 // AT2G27230 // AT4G02380 // AT5G08290 // AT2G05520 // AT4G35890 // AT1G73680 // AT2G42540 // AT5G52050 // AT5G04340 // AT3G04680 // AT4G25640 // AT2G42500 // AT1G25250 // AT1G54040 // AT5G56040 // AT5G52310 // AT5G01600 // AT5G62620
GO:0006952	P	defense response	39	608	1566	28362	0.19	1	// AT3G49120 // AT3G50970 // AT4G16760 // AT2G33380 // AT5G22290 // AT5G24660 // AT2G30020 // AT1G52400 // AT3G25040 // AT1G19570 // AT1G70830 // AT5G24780 // AT5G05110 // AT1G52410 // AT4G23670 // AT2G03760 // AT4G02380 // AT1G19670 // AT1G47128 // AT3G29090 // AT1G54040 // AT5G52640 // AT5G24770 // AT5G09440 // AT3G57260 // AT3G23820 // AT5G53120 // AT4G19700 // AT1G51090 // AT4G08870 // AT1G02…
GO:0012501	P	programmed cell death	6	608	147	28362	0.1	1	// AT2G38530 // AT1G21750 // AT1G32210 // AT5G22290 // AT1G79110 // AT4G19700
GO:0045333	P	cellular respiration	6	608	128	28362	0.064	1	// AT2G41730 // AT5G55070 // AT3G22370 // AT2G46505 // AT1G22840 // AT2G22780
GO:0006955	P	immune response	5	608	333	28362	0.84	1	// AT5G60360 // AT3G49120 // AT3G25040 // AT5G22290 // AT3G57260
GO:0034654	P	nucleobase-containing compound biosynthetic process	64	608	2781	28362	0.3	1	// AT2G18990 // AT1G64380 // AT5G11260 // AT5G04760 // AT3G61890 // AT3G24520 // AT5G23290 // AT5G15840 // AT1G75410 // AT5G24660 // AT1G32870 // AT3G51960 // AT4G30190 // AT4G28140 // AT1G53160 // AT1G01030 // AT5G41010 // AT1G45249 // AT1G29160 // AT4G09180 // AT1G71130 // AT1G51140 // AT4G35040 // AT5G59570 // AT2G25650 // AT5G59820 // AT2G23340 // AT4G23050 // AT5G66410 // AT4G37790 // AT2G38…
GO:0051603	P	proteolysis involved in cellular protein catabolic process	14	608	435	28362	0.093	1	// AT3G17000 // AT4G01610 // AT4G02890 // AT5G56150 // AT4G19700 // AT5G60360 // AT1G45050 // AT2G01150 // AT5G01720 // AT1G79110 // AT4G04210 // AT1G47128 // AT3G48350 // AT3G58040
GO:0044271	P	cellular nitrogen compound biosynthetic process	86	608	4436	28362	0.86	1	// AT1G64380 // AT5G11260 // AT4G37790 // AT4G30190 // AT4G28140 // AT3G02190 // AT2G27230 // AT1G51140 // AT5G59570 // AT1G26260 // AT2G35940 // AT1G42990 // AT5G62670 // AT3G47640 // AT5G53120 // AT2G40970 // AT5G04340 // AT4G36900 // AT4G26150 // AT2G18990 // AT5G23290 // AT2G47570 // AT3G51960 // AT1G71130 // AT4G27410 // AT3G15790 // AT4G35550 // AT2G22570 // AT2G18110 // AT5G47640 // AT3G17…
GO:0010154	P	fruit development	8	608	702	28362	0.98	1	// AT1G21750 // AT1G29160 // AT1G01470 // AT3G55610 // AT4G34710 // AT1G07430 // AT5G62620 // AT5G13200
GO:0046907	P	intracellular transport	5	608	473	28362	0.97	1	// AT4G30600 // AT3G17780 // AT5G50460 // AT5G42570 // AT1G16920
GO:0006355	P	regulation of transcription, DNA-templated	58	608	2443	28362	0.23	1	// AT1G64380 // AT5G11260 // AT5G04760 // AT3G61890 // AT3G24520 // AT5G23290 // AT5G15840 // AT1G75410 // AT5G24660 // AT1G32870 // AT3G51960 // AT4G28140 // AT1G53160 // AT1G01030 // AT1G45249 // AT1G29160 // AT4G09180 // AT1G71130 // AT1G51140 // AT4G35040 // AT5G59570 // AT2G25650 // AT5G59820 // AT2G23340 // AT4G23050 // AT4G37790 // AT2G38250 // AT2G35940 // AT3G15790 // AT4G35550 // AT5G49…
GO:0006351	P	transcription, DNA-templated	59	608	2559	28362	0.3	1	// AT1G64380 // AT5G11260 // AT5G04760 // AT3G61890 // AT3G24520 // AT5G23290 // AT5G15840 // AT1G75410 // AT5G24660 // AT1G32870 // AT3G51960 // AT4G28140 // AT1G53160 // AT1G01030 // AT5G41010 // AT1G45249 // AT1G29160 // AT4G09180 // AT1G71130 // AT1G51140 // AT4G35040 // AT5G59570 // AT2G25650 // AT5G59820 // AT2G23340 // AT4G23050 // AT4G37790 // AT2G38250 // AT2G35940 // AT3G15790 // AT4G35…
GO:1901617	P	organic hydroxy compound biosynthetic process	5	608	150	28362	0.23	1	// AT4G22880 // AT1G06570 // AT1G30530 // AT5G49330 // AT2G33380
GO:1901615	P	organic hydroxy compound metabolic process	6	608	215	28362	0.32	1	// AT4G22880 // AT1G06570 // AT5G49330 // AT2G33380 // AT2G03760 // AT1G30530
GO:0032774	P	RNA biosynthetic process	59	608	2566	28362	0.31	1	// AT1G64380 // AT5G11260 // AT5G04760 // AT3G61890 // AT3G24520 // AT5G23290 // AT5G15840 // AT1G75410 // AT5G24660 // AT1G32870 // AT3G51960 // AT4G28140 // AT1G53160 // AT1G01030 // AT5G41010 // AT1G45249 // AT1G29160 // AT4G09180 // AT1G71130 // AT1G51140 // AT4G35040 // AT5G59570 // AT2G25650 // AT5G59820 // AT2G23340 // AT4G23050 // AT4G37790 // AT2G38250 // AT2G35940 // AT3G15790 // AT4G35…
GO:0043043	P	peptide biosynthetic process	14	608	1514	28362	1	1	// AT3G01170 // AT2G47570 // AT3G09200 // AT3G08730 // AT2G40205 // AT3G08520 // ATCG00960 // AT4G34590 // ATCG01170 // AT1G23290 // ATCG00250 // AT1G70600 // AT2G18110 // AT3G02190
GO:0030154	P	cell differentiation	8	608	768	28362	0.99	1	// AT5G49330 // AT3G04620 // AT2G42500 // AT4G26150 // AT5G15840 // AT1G56430 // AT5G15470 // AT2G35940
GO:0044723	P	single-organism carbohydrate metabolic process	18	608	613	28362	0.12	1	// AT5G20830 // AT1G51590 // AT1G77810 // AT3G04240 // AT1G56600 // AT1G32210 // AT3G08590 // AT5G62220 // AT2G36580 // AT2G25450 // AT3G17940 // AT2G22780 // AT5G15470 // AT4G39210 // AT3G15350 // AT5G15650 // AT5G62620 // AT5G51830
GO:0043632	P	modification-dependent macromolecule catabolic process	10	608	380	28362	0.3	1	// AT3G17000 // AT4G04210 // AT5G56150 // AT1G45050 // AT5G01720 // AT4G02890 // AT1G79110 // AT4G19700 // AT2G01150 // AT3G58040
GO:0006139	P	nucleobase-containing compound metabolic process	82	608	4178	28362	0.82	1	// AT2G18990 // AT1G77680 // AT5G11260 // AT5G04760 // AT1G64380 // AT3G61890 // AT3G24520 // AT5G23290 // AT5G15840 // AT1G75410 // AT5G24660 // AT1G32870 // AT3G51960 // AT4G30190 // AT4G28140 // AT1G53160 // AT3G08590 // AT1G01030 // AT3G23810 // AT5G41010 // AT1G45249 // AT1G64810 // AT1G29160 // AT4G09180 // AT1G71130 // AT1G26260 // AT1G51140 // AT4G35040 // AT5G59570 // AT2G36580 // AT5G59…
GO:0009808	P	lignin metabolic process	5	608	95	28362	0.06	1	// AT4G34230 // AT4G30470 // AT4G39330 // AT2G23910 // AT2G33590
GO:0043161	P	proteasome-mediated ubiquitin-dependent protein catabolic process	5	608	170	28362	0.31	1	// AT4G19700 // AT1G79110 // AT1G45050 // AT4G04210 // AT2G01150
GO:0009116	P	nucleoside metabolic process	9	608	258	28362	0.11	1	// AT2G18990 // AT5G66410 // AT2G36580 // AT1G22840 // AT2G01670 // AT4G30190 // AT5G62670 // AT3G08590 // AT3G23810
GO:0042278	P	purine nucleoside metabolic process	6	608	200	28362	0.27	1	// AT5G62670 // AT1G22840 // AT4G30190 // AT2G36580 // AT3G08590 // AT3G23810
GO:0043933	P	macromolecular complex subunit organization	10	608	745	28362	0.96	1	// AT1G64660 // AT2G42540 // AT4G15770 // AT2G16700 // AT3G17930 // AT1G52400 // AT2G18050 // AT3G20810 // AT5G08290 // AT1G78790
GO:0006508	P	proteolysis	18	608	907	28362	0.66	1	// AT3G17000 // AT4G01610 // AT4G04210 // AT3G54130 // AT5G56150 // AT1G06430 // AT4G19700 // AT5G60360 // AT1G45050 // AT2G01150 // AT5G01720 // AT1G23440 // AT3G10450 // AT1G79110 // AT4G02890 // AT1G47128 // AT3G48350 // AT3G58040
GO:0060560	P	developmental growth involved in morphogenesis	8	608	334	28362	0.43	1	// AT3G49120 // AT1G26770 // AT1G56430 // AT3G55500 // AT1G09330 // AT5G15470 // AT1G69530 // AT2G05520
GO:1903508	P	positive regulation of nucleic acid-templated transcription	12	608	348	28362	0.079	1	// AT1G45249 // AT5G49330 // AT2G27230 // AT3G61890 // AT5G22290 // AT4G34590 // AT2G26150 // AT5G24660 // AT5G05410 // AT2G46680 // AT4G27410 // AT3G56290
GO:0016070	P	RNA metabolic process	68	608	3403	28362	0.75	1	// AT1G77680 // AT1G64380 // AT5G11260 // AT5G04760 // AT3G61890 // AT3G24520 // AT5G23290 // AT5G15840 // AT1G75410 // AT5G24660 // AT1G32870 // AT3G51960 // AT4G28140 // AT1G53160 // AT1G01030 // AT5G41010 // AT1G45249 // AT1G64810 // AT1G29160 // AT4G09180 // AT1G71130 // AT1G51140 // AT4G35040 // AT5G59570 // AT2G25650 // AT5G59820 // AT2G23340 // AT4G23050 // AT1G55140 // AT5G16450 // AT2G38…
GO:0032501	P	multicellular organismal process	74	608	3032	28362	0.14	1	// AT2G42540 // AT5G11260 // AT1G54040 // AT3G04620 // AT3G61890 // AT4G16760 // AT1G67360 // AT5G15840 // AT1G06430 // AT2G39800 // AT1G45050 // AT3G55610 // AT3G10870 // AT2G30140 // AT1G01030 // AT1G53160 // AT4G16370 // AT1G23290 // AT1G27950 // AT1G21750 // AT2G40080 // AT4G24960 // AT1G29160 // AT2G27230 // AT2G46690 // AT3G08590 // AT1G51140 // AT4G15910 // AT5G59570 // AT5G33210 // AT1G32…
GO:0009987	P	cellular process	291	608	12771	28362	0.089	1	// AT1G64380 // AT5G11260 // AT2G39020 // AT5G24030 // AT3G55500 // AT2G33380 // AT4G37790 // AT2G25450 // AT3G55610 // AT3G10870 // AT4G30190 // AT3G56310 // AT4G28140 // AT4G05320 // AT4G04210 // AT2G01150 // AT2G45920 // AT1G21750 // AT1G54150 // AT4G04610 // AT1G64810 // AT2G27230 // AT2G46690 // AT3G21780 // AT1G51140 // ATCG00020 // AT5G59570 // AT5G33210 // AT1G26260 // AT5G06370 // AT1G55…
GO:0006725	P	cellular aromatic compound metabolic process	98	608	4588	28362	0.53	1	// AT1G64380 // AT5G11260 // AT4G37790 // AT3G10870 // AT4G30190 // AT4G28140 // AT3G08590 // AT3G23810 // AT2G27230 // AT1G51140 // AT5G59570 // AT3G61890 // AT1G55140 // AT5G16450 // AT1G64810 // AT2G35940 // AT5G08290 // AT1G42990 // AT5G62670 // AT2G26150 // AT3G23820 // AT2G40970 // AT5G04340 // AT4G36900 // AT3G04680 // AT4G26150 // AT2G18990 // AT5G23290 // AT3G21560 // AT3G51960 // AT2G23…
GO:1903506	P	regulation of nucleic acid-templated transcription	58	608	2445	28362	0.23	1	// AT1G64380 // AT5G11260 // AT5G04760 // AT3G61890 // AT3G24520 // AT5G23290 // AT5G15840 // AT1G75410 // AT5G24660 // AT1G32870 // AT3G51960 // AT4G28140 // AT1G53160 // AT1G01030 // AT1G45249 // AT1G29160 // AT4G09180 // AT1G71130 // AT1G51140 // AT4G35040 // AT5G59570 // AT2G25650 // AT5G59820 // AT2G23340 // AT4G23050 // AT4G37790 // AT2G38250 // AT2G35940 // AT3G15790 // AT4G35550 // AT5G49…
GO:0010200	P	response to chitin	6	608	134	28362	0.075	1	// AT1G42990 // AT1G64380 // AT5G59820 // AT2G26150 // AT4G28140 // AT5G04340
GO:0051252	P	regulation of RNA metabolic process	59	608	2474	28362	0.22	1	// AT1G64380 // AT5G11260 // AT5G04760 // AT3G61890 // AT3G24520 // AT5G23290 // AT5G15840 // AT1G75410 // AT5G24660 // AT1G32870 // AT3G51960 // AT4G28140 // AT1G53160 // AT1G01030 // AT1G45249 // AT1G29160 // AT4G09180 // AT1G71130 // AT1G51140 // AT4G35040 // AT5G59570 // AT2G25650 // AT5G59820 // AT2G23340 // AT4G23050 // AT5G16450 // AT2G38250 // AT2G35940 // AT3G15790 // AT4G35550 // AT4G37…
GO:0051254	P	positive regulation of RNA metabolic process	12	608	356	28362	0.089	1	// AT1G45249 // AT5G49330 // AT2G27230 // AT3G61890 // AT5G22290 // AT4G34590 // AT2G26150 // AT5G24660 // AT5G05410 // AT2G46680 // AT4G27410 // AT3G56290
GO:0071369	P	cellular response to ethylene stimulus	6	608	206	28362	0.29	1	// AT4G36900 // AT1G64380 // AT1G71130 // AT2G23340 // AT4G28140 // AT2G20880
GO:0032989	P	cellular component morphogenesis	9	608	436	28362	0.59	1	// AT3G49120 // AT2G42230 // AT1G26770 // AT1G56430 // AT3G55500 // AT1G09330 // AT5G15470 // AT1G69530 // AT2G05520
GO:0071705	P	nitrogen compound transport	9	608	339	28362	0.31	1	// AT1G58360 // AT5G61810 // AT5G50200 // AT4G38250 // AT1G69870 // AT5G65990 // AT1G05940 // AT1G68570 // AT4G16370
GO:0071704	P	organic substance metabolic process	233	608	10672	28362	0.38	1	// AT1G64380 // AT5G11260 // AT2G39020 // AT5G53120 // AT1G64660 // AT2G33380 // AT4G37790 // AT2G25450 // AT3G55610 // AT3G10870 // AT4G30190 // AT3G56310 // AT4G28140 // AT4G05320 // AT4G04210 // AT2G01150 // AT2G45920 // AT1G54150 // AT4G04610 // AT2G27230 // AT3G21780 // AT1G51140 // ATCG00020 // AT5G66410 // AT5G59570 // AT1G26260 // AT2G03760 // AT5G16450 // AT1G64810 // AT2G35940 // AT3G20…
GO:0010556	P	regulation of macromolecule biosynthetic process	59	608	2666	28362	0.42	1	// AT1G64380 // AT5G11260 // AT5G04760 // AT3G61890 // AT3G24520 // AT5G23290 // AT5G15840 // AT1G75410 // AT5G24660 // AT1G32870 // AT3G51960 // AT4G28140 // AT1G53160 // AT1G01030 // AT1G45249 // AT1G29160 // AT4G09180 // AT1G71130 // AT1G51140 // AT4G35040 // AT5G59570 // AT2G25650 // AT5G59820 // AT2G23340 // AT4G23050 // AT4G37790 // AT2G38250 // AT2G35940 // AT3G15790 // AT4G35550 // AT5G49…
GO:0071702	P	organic substance transport	30	608	1234	28362	0.27	1	// AT2G38530 // AT5G59310 // AT5G65270 // AT4G38250 // AT5G65990 // AT3G25040 // AT4G16370 // AT1G58360 // AT1G27950 // AT1G16920 // AT1G67300 // AT1G09330 // AT1G68570 // AT4G30600 // AT3G17780 // AT5G26340 // AT5G47560 // AT1G69870 // AT2G25520 // AT4G27840 // AT3G09900 // AT4G17550 // AT5G52050 // AT4G32390 // AT5G42570 // AT5G50460 // AT5G61810 // AT1G55690 // AT1G05940 // AT2G22500
GO:0015698	P	inorganic anion transport	5	608	95	28362	0.06	1	// AT1G69870 // AT5G61810 // AT5G50200 // AT2G22500 // AT5G24030
GO:0034613	P	cellular protein localization	6	608	410	28362	0.87	1	// AT4G30600 // AT3G17780 // AT5G42570 // AT5G50460 // AT1G16920 // AT3G25040
GO:0009058	P	biosynthetic process	142	608	6255	28362	0.24	1	// AT1G64380 // AT5G11260 // AT4G16760 // AT1G64660 // AT2G33380 // AT4G37790 // AT2G25450 // AT3G55610 // AT4G30190 // AT4G28140 // AT3G02190 // AT2G27230 // AT1G51140 // AT5G59570 // AT5G33210 // AT1G26260 // AT5G62220 // AT3G04240 // AT2G35940 // AT5G05600 // AT5G20830 // AT1G77810 // AT5G62670 // AT3G47640 // AT3G23820 // AT5G53120 // AT2G40970 // AT5G04340 // AT4G36900 // AT1G64950 // AT1G56…
GO:0009059	P	macromolecule biosynthetic process	81	608	4511	28362	0.96	1	// AT3G01170 // AT5G11260 // AT5G04760 // AT2G47570 // AT1G64380 // AT3G61890 // AT3G24520 // AT5G23290 // AT5G15840 // AT1G75410 // AT5G24660 // AT1G32870 // AT3G51960 // AT1G70600 // AT4G28140 // AT1G53160 // AT1G01030 // AT3G02190 // AT5G49330 // AT5G41010 // AT1G45249 // AT1G51590 // AT1G29160 // AT4G09180 // AT1G71130 // AT1G51140 // AT4G35040 // AT5G59570 // AT2G25650 // AT5G59820 // AT2G23…
GO:0009117	P	nucleotide metabolic process	6	608	302	28362	0.63	1	// AT2G22570 // AT5G62670 // AT1G22840 // AT4G30190 // AT2G36580 // AT3G08590
GO:0051173	P	positive regulation of nitrogen compound metabolic process	13	608	399	28362	0.096	1	// AT1G45249 // AT5G49330 // AT2G27230 // AT3G61890 // AT5G22290 // AT4G34590 // AT3G08730 // AT5G24660 // AT5G05410 // AT2G26150 // AT2G46680 // AT4G27410 // AT3G56290
GO:0009119	P	ribonucleoside metabolic process	8	608	227	28362	0.12	1	// AT2G18990 // AT2G36580 // AT1G22840 // AT5G66410 // AT4G30190 // AT5G62670 // AT3G08590 // AT3G23810
GO:0009057	P	macromolecule catabolic process	21	608	747	28362	0.13	1	// AT1G77680 // AT1G64390 // AT5G01720 // AT3G17000 // AT4G01610 // AT1G47128 // AT4G04210 // AT3G29090 // AT5G56150 // AT1G06430 // AT4G19700 // AT5G60360 // AT1G45050 // AT3G48350 // AT3G23920 // AT3G43270 // AT1G79110 // AT4G02890 // AT3G49220 // AT2G01150 // AT3G58040
GO:1901657	P	glycosyl compound metabolic process	11	608	326	28362	0.1	1	// AT2G18990 // AT2G01670 // AT2G36580 // AT5G66410 // AT1G22840 // AT1G52400 // AT4G30190 // AT3G03640 // AT5G62670 // AT3G08590 // AT3G23810
GO:0019684	P	photosynthesis, light reaction	5	608	134	28362	0.17	1	// ATCG00280 // AT5G57050 // AT1G06430 // ATCG00020 // AT4G04020
GO:0080090	P	regulation of primary metabolic process	67	608	2889	28362	0.27	1	// AT1G64380 // AT5G11260 // AT5G04760 // AT3G61890 // AT3G24520 // AT5G23290 // AT5G15840 // AT1G75410 // AT2G25450 // AT5G24660 // AT1G32870 // AT3G51960 // AT5G57050 // AT1G53160 // AT4G28140 // AT1G45249 // AT1G29160 // AT4G09180 // AT1G71130 // AT3G56290 // AT1G51140 // AT4G35040 // AT5G59570 // AT2G25650 // AT5G59820 // AT2G23340 // AT5G13930 // AT4G23050 // AT5G16450 // AT2G22780 // AT2G35…
GO:0061024	P	membrane organization	6	608	212	28362	0.31	1	// AT4G30600 // AT2G38530 // AT2G42540 // AT1G05560 // AT1G06430 // AT4G04210
GO:0015979	P	photosynthesis	8	608	253	28362	0.18	1	// ATCG00630 // ATCG00020 // AT1G06430 // AT5G01600 // AT5G57050 // AT1G64810 // AT4G04020 // ATCG00280
GO:0010604	P	positive regulation of macromolecule metabolic process	13	608	482	28362	0.24	1	// AT1G45249 // AT5G49330 // AT2G27230 // AT3G61890 // AT5G22290 // AT4G34590 // AT3G08730 // AT5G24660 // AT5G05410 // AT2G26150 // AT2G46680 // AT4G27410 // AT3G56290
GO:0070727	P	cellular macromolecule localization	6	608	441	28362	0.91	1	// AT4G30600 // AT3G17780 // AT5G42570 // AT5G50460 // AT1G16920 // AT3G25040
GO:0070647	P	protein modification by small protein conjugation or removal	10	608	610	28362	0.84	1	// AT1G54150 // AT3G12580 // AT3G17000 // AT5G56150 // AT3G54130 // AT1G45050 // AT2G45920 // AT4G19700 // AT2G01150 // AT3G58040
GO:0018193	P	peptidyl-amino acid modification	7	608	284	28362	0.41	1	// AT3G28480 // AT3G55920 // AT5G58380 // AT5G10930 // AT1G08650 // AT5G62620 // AT2G30360
GO:0044419	P	interspecies interaction between organisms	6	608	154	28362	0.12	1	// AT3G49120 // AT3G12580 // AT2G25620 // AT3G61890 // AT3G09440 // AT1G19570
GO:0009205	P	purine ribonucleoside triphosphate metabolic process	5	608	155	28362	0.25	1	// AT4G30190 // AT3G08590 // AT5G62670 // AT1G22840 // AT2G36580
GO:0060255	P	regulation of macromolecule metabolic process	68	608	2998	28362	0.33	1	// AT1G64380 // AT5G11260 // AT5G04760 // AT3G61890 // AT3G24520 // AT5G23290 // AT5G15840 // AT1G75410 // AT5G24660 // AT1G32870 // AT3G51960 // AT5G57050 // AT1G53160 // AT4G28140 // AT1G45249 // AT1G64810 // AT1G29160 // AT4G09180 // AT1G71130 // AT3G56290 // AT1G51140 // AT4G35040 // AT5G59570 // AT2G25650 // AT5G59820 // AT2G23340 // AT4G23050 // AT5G16450 // AT2G38250 // AT2G35940 // AT5G53…
GO:0030163	P	protein catabolic process	15	608	467	28362	0.086	1	// AT3G17000 // AT4G01610 // AT4G04210 // AT5G56150 // AT1G06430 // AT4G19700 // AT5G60360 // AT1G45050 // AT2G01150 // AT5G01720 // AT1G79110 // AT4G02890 // AT1G47128 // AT3G48350 // AT3G58040
GO:0046128	P	purine ribonucleoside metabolic process	6	608	197	28362	0.26	1	// AT5G62670 // AT1G22840 // AT4G30190 // AT2G36580 // AT3G08590 // AT3G23810
GO:0006163	P	purine nucleotide metabolic process	5	608	204	28362	0.45	1	// AT4G30190 // AT3G08590 // AT5G62670 // AT1G22840 // AT2G36580
GO:0009873	P	ethylene-activated signaling pathway	6	608	185	28362	0.21	1	// AT4G36900 // AT1G64380 // AT1G71130 // AT2G23340 // AT4G28140 // AT2G20880
GO:0019439	P	aromatic compound catabolic process	5	608	178	28362	0.34	1	// AT1G77680 // AT1G19670 // AT1G06570 // AT5G36160 // AT2G01670
GO:0019438	P	aromatic compound biosynthetic process	74	608	3058	28362	0.15	1	// AT2G18990 // AT1G64380 // AT5G11260 // AT5G04760 // AT3G61890 // AT3G24520 // AT5G23290 // AT5G15840 // AT1G75410 // AT5G24660 // AT1G32870 // AT3G51960 // AT4G30190 // AT1G45249 // AT4G28140 // AT1G53160 // AT1G01030 // AT2G23910 // AT5G41010 // AT4G34230 // AT4G39330 // AT1G29160 // AT4G09180 // AT1G71130 // AT1G51140 // AT4G35040 // AT5G59570 // AT2G25650 // AT5G59820 // AT2G23340 // AT5G13…
GO:0042742	P	defense response to bacterium	12	608	354	28362	0.087	1	// AT3G49120 // AT1G02205 // AT4G19700 // AT1G54040 // AT4G23670 // AT5G24660 // AT3G23820 // AT5G52640 // AT5G53120 // AT1G19670 // AT3G29090 // AT1G51090
GO:0048589	P	developmental growth	11	608	458	28362	0.4	1	// AT3G49120 // AT3G20470 // AT3G55500 // AT1G56430 // AT5G56040 // AT1G67360 // AT1G09330 // AT5G15470 // AT1G69530 // AT1G26770 // AT2G05520
GO:1901576	P	organic substance biosynthetic process	135	608	5913	28362	0.22	1	// AT1G64380 // AT5G11260 // AT4G16760 // AT1G64660 // AT2G33380 // AT4G37790 // AT2G25450 // AT3G55610 // AT4G30190 // AT4G28140 // AT3G02190 // AT2G27230 // AT1G51140 // AT5G59570 // AT1G26260 // AT5G62220 // AT3G04240 // AT2G35940 // AT5G05600 // AT5G20830 // AT1G77810 // AT5G62670 // AT3G47640 // AT3G23820 // AT5G53120 // AT2G40970 // AT5G04340 // AT4G36900 // AT1G56600 // AT1G13280 // AT4G26…
GO:0016049	P	cell growth	10	608	428	28362	0.44	1	// AT3G49120 // AT3G20470 // AT5G66410 // AT1G26770 // AT1G56430 // AT3G55500 // AT1G09330 // AT5G15470 // AT1G69530 // AT2G05520
GO:0046483	P	heterocycle metabolic process	88	608	4433	28362	0.8	1	// AT1G64380 // AT5G11260 // AT4G37790 // AT3G10870 // AT4G30190 // AT4G28140 // AT3G08590 // AT3G23810 // AT2G27230 // AT1G51140 // AT5G59570 // AT1G26260 // AT1G55140 // AT5G16450 // AT1G64810 // AT2G35940 // AT5G08290 // AT5G62670 // AT3G47640 // AT3G23820 // AT2G40970 // AT5G04340 // AT4G36900 // AT3G04680 // AT4G26150 // AT2G18990 // AT5G23290 // AT3G51960 // AT1G71130 // AT2G36580 // AT4G27…
GO:0016043	P	cellular component organization	46	608	2456	28362	0.85	1	// AT2G38530 // AT1G05560 // AT1G64660 // AT5G24020 // AT3G55500 // AT1G06430 // AT5G24660 // AT3G49120 // AT1G52400 // AT3G43270 // AT3G56310 // AT1G04770 // AT4G04210 // AT1G26770 // AT1G54150 // AT1G71360 // AT1G56430 // AT4G23630 // AT5G15470 // AT1G64810 // AT2G35940 // AT3G20810 // AT3G29090 // AT5G08290 // AT1G09330 // AT4G30600 // AT4G22880 // AT1G64390 // ATCG00250 // AT3G17930 // AT5G15…
GO:0065003	P	macromolecular complex assembly	8	608	424	28362	0.69	1	// AT1G64660 // AT2G42540 // AT4G15770 // AT3G17930 // AT1G52400 // AT2G18050 // AT5G08290 // AT1G78790
GO:0098662	P	inorganic cation transmembrane transport	6	608	153	28362	0.12	1	// AT2G16510 // AT1G35720 // AT4G30190 // AT5G55290 // AT1G07430 // AT5G27150
GO:0065009	P	regulation of molecular function	8	608	249	28362	0.17	1	// AT4G01026 // AT3G05640 // AT4G01610 // AT3G47380 // AT1G49620 // AT5G57050 // AT4G19700 // AT2G28060
GO:0009150	P	purine ribonucleotide metabolic process	5	608	202	28362	0.44	1	// AT4G30190 // AT3G08590 // AT5G62670 // AT1G22840 // AT2G36580
GO:0036211	P	protein modification process	48	608	2126	28362	0.38	1	// AT3G28480 // AT3G54030 // AT3G17000 // AT3G08730 // AT5G56150 // AT1G72770 // AT1G45050 // AT2G30020 // AT4G26080 // AT2G01150 // AT2G45920 // AT1G54150 // AT1G51590 // AT4G33080 // ATCG00020 // AT4G05320 // AT5G58380 // AT1G49620 // AT3G04240 // AT4G23050 // AT1G08650 // AT3G20810 // AT4G02890 // AT4G11890 // AT2G28060 // AT4G02410 // AT1G77810 // AT3G55920 // AT3G05640 // AT5G57050 // AT4G19…
GO:0044802	P	single-organism membrane organization	5	608	153	28362	0.24	1	// AT4G30600 // AT2G38530 // AT2G42540 // AT4G04210 // AT1G06430
GO:0008152	P	metabolic process	271	608	12035	28362	0.16	1	// AT1G64380 // AT5G11260 // AT2G39020 // AT5G53120 // AT1G64660 // AT2G33380 // AT4G37790 // AT2G25450 // AT4G11600 // AT3G55610 // AT3G10870 // AT3G08610 // AT4G30190 // AT3G56310 // AT4G28140 // AT4G05320 // AT4G04210 // AT2G01150 // AT2G45920 // AT1G54150 // AT4G04610 // AT2G27230 // AT3G21780 // AT1G51140 // ATCG00020 // AT5G66410 // AT5G59570 // AT5G33210 // AT1G26260 // AT5G52320 // AT2G12…
GO:1901698	P	response to nitrogen compound	9	608	264	28362	0.12	1	// AT1G42990 // AT1G64380 // AT1G61340 // AT2G26150 // AT5G66400 // AT5G50200 // AT5G59820 // AT4G28140 // AT5G04340
GO:0016310	P	phosphorylation	24	608	1254	28362	0.74	1	// AT3G54030 // AT3G08730 // AT2G39800 // AT3G55610 // AT3G08590 // AT4G33080 // AT2G36580 // AT5G58380 // AT4G23050 // AT1G08650 // AT2G28060 // AT4G02410 // AT5G26340 // AT1G22840 // AT5G57050 // AT5G53450 // AT5G56040 // AT1G71697 // AT1G49620 // AT5G10930 // AT3G07700 // AT4G13020 // AT4G11890 // AT2G30360
GO:0009791	P	post-embryonic development	33	608	1576	28362	0.58	1	// AT5G11260 // AT1G26260 // AT5G15840 // AT1G45050 // AT3G55610 // AT2G30140 // AT1G01030 // AT1G23290 // AT1G21750 // AT2G40080 // AT4G24960 // AT1G29160 // AT1G51140 // AT5G59570 // AT3G12145 // AT3G20810 // AT2G43820 // AT1G52410 // AT5G37260 // AT5G13200 // AT1G20450 // AT3G04680 // AT4G25640 // AT1G01470 // AT1G25250 // AT5G22290 // AT1G53160 // AT5G01600 // AT4G34710 // AT4G26150 // AT1G07…
GO:0009790	P	embryo development	7	608	571	28362	0.96	1	// AT1G21750 // AT1G01470 // AT4G15910 // AT3G55610 // AT4G34710 // AT4G02380 // AT5G13200
GO:0034641	P	cellular nitrogen compound metabolic process	106	608	5805	28362	0.97	1	// AT1G64380 // AT5G11260 // AT4G37790 // AT3G10870 // AT4G30190 // AT4G28140 // AT3G08590 // AT3G02190 // AT2G27230 // AT1G51140 // AT5G59570 // AT1G26260 // AT1G55140 // AT5G16450 // AT1G64810 // AT2G35940 // AT5G08290 // AT1G42990 // AT5G62670 // AT3G47640 // AT3G23820 // AT5G53120 // AT2G40970 // AT5G04340 // AT4G36900 // AT3G04680 // AT4G26150 // AT2G18990 // AT5G23290 // AT3G24170 // AT2G47…
GO:0045229	P	external encapsulating structure organization	10	608	551	28362	0.74	1	// AT1G64390 // AT3G55500 // AT5G15650 // AT1G69530 // AT5G15470 // AT3G43270 // AT3G56310 // AT1G26770 // AT3G29090 // AT3G49220
GO:0034645	P	cellular macromolecule biosynthetic process	81	608	4455	28362	0.95	1	// AT3G01170 // AT5G11260 // AT5G04760 // AT2G47570 // AT1G64380 // AT3G61890 // AT3G24520 // AT5G23290 // AT5G15840 // AT1G75410 // AT5G24660 // AT1G32870 // AT3G51960 // AT1G70600 // AT4G28140 // AT1G53160 // AT1G01030 // AT3G02190 // AT5G49330 // AT5G41010 // AT1G45249 // AT1G51590 // AT1G29160 // AT4G09180 // AT1G71130 // AT1G51140 // AT4G35040 // AT5G59570 // AT2G25650 // AT5G59820 // AT2G23…
GO:0023051	P	regulation of signaling	9	608	231	28362	0.068	1	// AT5G11260 // AT4G26080 // AT4G11890 // AT5G57050 // AT3G11410 // AT1G53300 // AT1G07430 // AT1G52400 // AT2G01150
GO:0010646	P	regulation of cell communication	9	608	234	28362	0.072	1	// AT5G11260 // AT4G26080 // AT4G11890 // AT5G57050 // AT3G11410 // AT1G53300 // AT1G07430 // AT1G52400 // AT2G01150
GO:0009126	P	purine nucleoside monophosphate metabolic process	5	608	174	28362	0.32	1	// AT4G30190 // AT3G08590 // AT5G62670 // AT1G22840 // AT2G36580
GO:0043086	P	negative regulation of catalytic activity	5	608	99	28362	0.068	1	// AT3G47380 // AT4G01026 // AT1G49620 // AT4G19700 // AT5G57050
GO:0009555	P	pollen development	11	608	311	28362	0.079	1	// AT1G67360 // AT4G24960 // AT3G04620 // AT4G25640 // AT4G16760 // AT1G56430 // AT5G15650 // AT2G39800 // AT3G55610 // AT5G15470 // AT3G08590
GO:0022613	P	ribonucleoprotein complex biogenesis	7	608	399	28362	0.75	1	// AT1G77680 // AT4G15770 // AT3G09200 // AT1G55140 // AT1G20015 // AT5G08290 // AT5G51174
GO:0044238	P	primary metabolic process	200	608	9890	28362	0.85	1	// AT1G64380 // AT5G11260 // AT2G39020 // AT4G16760 // AT1G64660 // AT2G33380 // AT4G37790 // AT2G25450 // AT3G55610 // AT4G30190 // AT3G56310 // AT4G28140 // AT4G04210 // AT2G01150 // AT2G45920 // AT1G54150 // AT2G27230 // AT1G51140 // ATCG00020 // AT5G59570 // AT1G26260 // AT2G03760 // AT5G16450 // AT1G64810 // AT2G35940 // AT3G20810 // AT5G08290 // AT4G08870 // AT1G64390 // AT5G20830 // AT1G77…
GO:0030001	P	metal ion transport	8	608	263	28362	0.21	1	// AT3G15352 // AT5G47560 // AT1G35720 // AT5G01600 // AT1G66240 // AT1G07430 // AT5G27150 // AT4G16370
GO:0045893	P	positive regulation of transcription, DNA-templated	12	608	347	28362	0.078	1	// AT1G45249 // AT5G49330 // AT2G27230 // AT3G61890 // AT5G22290 // AT4G34590 // AT2G26150 // AT5G24660 // AT5G05410 // AT2G46680 // AT4G27410 // AT3G56290
GO:0030003	P	cellular cation homeostasis	5	608	122	28362	0.13	1	// AT5G27150 // AT4G16370 // AT5G47560 // AT1G66240 // AT5G01600
GO:0055080	P	cation homeostasis	8	608	194	28362	0.064	1	// AT5G47560 // AT3G47640 // AT5G01600 // AT1G66240 // AT5G13740 // AT5G27150 // AT2G41240 // AT4G16370
GO:0055082	P	cellular chemical homeostasis	7	608	163	28362	0.068	1	// AT5G47560 // AT1G45249 // AT5G01600 // AT1G66240 // AT5G24030 // AT5G27150 // AT4G16370
GO:0055086	P	nucleobase-containing small molecule metabolic process	11	608	370	28362	0.18	1	// AT2G18990 // AT2G22570 // AT5G66410 // AT2G36580 // AT1G22840 // AT2G01670 // AT4G30190 // AT5G62670 // AT3G08590 // AT3G17810 // AT3G23810
GO:0051093	P	negative regulation of developmental process	5	608	125	28362	0.14	1	// AT1G07430 // AT1G45050 // AT5G62620 // AT5G22290 // AT4G26150
GO:0043604	P	amide biosynthetic process	15	608	1536	28362	1	1	// AT4G08870 // AT3G01170 // AT2G47570 // AT3G09200 // AT3G08730 // AT2G40205 // AT3G08520 // ATCG00960 // AT4G34590 // ATCG01170 // AT1G23290 // ATCG00250 // AT1G70600 // AT2G18110 // AT3G02190
GO:0032268	P	regulation of cellular protein metabolic process	6	608	350	28362	0.76	1	// AT3G08730 // AT4G34590 // AT1G49620 // AT5G57050 // AT4G19700 // AT2G28060
GO:0005996	P	monosaccharide metabolic process	5	608	99	28362	0.068	1	// AT1G56600 // AT5G15650 // AT3G17940 // AT3G08590 // AT5G51830
GO:0043170	P	macromolecule metabolic process	145	608	8111	28362	1	1	// AT1G64380 // AT5G11260 // AT4G37790 // AT4G28140 // AT4G04210 // AT2G01150 // AT2G45920 // AT1G54150 // AT2G27230 // AT1G51140 // ATCG00020 // AT5G59570 // AT1G26260 // AT1G55140 // AT5G16450 // AT1G64810 // AT2G35940 // AT3G20810 // AT5G08290 // AT1G64390 // AT1G77810 // AT3G55920 // ATCG00250 // AT3G47640 // AT5G57050 // AT2G40970 // AT4G19700 // AT5G04340 // AT4G36900 // AT3G04680 // AT5G60…
GO:0010628	P	positive regulation of gene expression	13	608	383	28362	0.076	1	// AT1G45249 // AT5G49330 // AT2G27230 // AT3G61890 // AT5G22290 // AT4G34590 // AT3G08730 // AT5G24660 // AT5G05410 // AT2G26150 // AT2G46680 // AT4G27410 // AT3G56290
GO:0031326	P	regulation of cellular biosynthetic process	62	608	2734	28362	0.34	1	// AT1G64380 // AT5G11260 // AT5G04760 // AT3G61890 // AT3G24520 // AT5G23290 // AT5G15840 // AT1G75410 // AT2G25450 // AT5G24660 // AT1G32870 // AT3G51960 // AT4G28140 // AT1G53160 // AT1G01030 // AT1G45249 // AT1G29160 // AT4G09180 // AT1G71130 // AT1G51140 // AT4G35040 // AT5G59570 // AT2G25650 // AT5G59820 // AT2G23340 // AT4G23050 // AT4G37790 // AT2G22780 // AT2G35940 // AT3G15790 // AT2G38…
GO:0031325	P	positive regulation of cellular metabolic process	14	608	495	28362	0.19	1	// AT1G45249 // AT5G49330 // AT2G27230 // AT3G61890 // AT1G25250 // AT5G22290 // AT4G34590 // AT3G08730 // AT5G24660 // AT5G05410 // AT2G26150 // AT2G46680 // AT4G27410 // AT3G56290
GO:0031324	P	negative regulation of cellular metabolic process	6	608	412	28362	0.87	1	// AT1G06430 // AT4G34590 // AT1G49620 // AT5G57050 // AT4G04020 // AT4G19700
GO:0031323	P	regulation of cellular metabolic process	70	608	2980	28362	0.23	1	// AT1G64380 // AT5G11260 // AT5G04760 // AT3G61890 // AT3G24520 // AT5G23290 // AT5G15840 // AT1G06430 // AT2G25450 // AT5G24660 // AT1G32870 // AT3G51960 // AT5G57050 // AT1G53160 // AT4G28140 // AT1G45249 // AT2G40970 // AT1G29160 // AT4G09180 // AT1G71130 // AT3G56290 // AT1G51140 // AT5G05410 // AT5G59570 // AT4G27410 // AT5G59820 // AT2G23340 // AT4G23050 // AT5G16450 // AT2G38250 // AT2G35…
GO:0090304	P	nucleic acid metabolic process	69	608	3768	28362	0.93	1	// AT1G77680 // AT1G64380 // AT5G11260 // AT5G04760 // AT3G61890 // AT3G24520 // AT5G23290 // AT5G15840 // AT1G75410 // AT5G24660 // AT1G32870 // AT3G51960 // AT4G28140 // AT1G53160 // AT1G01030 // AT5G41010 // AT1G45249 // AT1G64810 // AT1G29160 // AT4G09180 // AT1G71130 // AT1G51140 // AT4G35040 // AT5G59570 // AT2G25650 // AT5G59820 // AT2G23340 // AT4G23050 // AT1G55140 // AT5G16450 // AT2G38…
GO:0040007	P	growth	17	608	678	28362	0.29	1	// AT3G49120 // AT3G05640 // AT3G20470 // AT2G46690 // AT2G05520 // AT5G66410 // AT3G55500 // AT1G56430 // AT4G39730 // AT1G26260 // AT1G69530 // AT1G67360 // AT3G16800 // AT5G15470 // AT1G26770 // AT5G56040 // AT1G09330
GO:0071822	P	protein complex subunit organization	7	608	338	28362	0.59	1	// AT1G64660 // AT2G42540 // AT1G52400 // AT3G17930 // AT2G16700 // AT2G18050 // AT1G78790
GO:0040008	P	regulation of growth	8	608	276	28362	0.25	1	// AT1G67360 // AT3G05640 // AT3G20470 // AT2G46690 // AT4G39730 // AT1G26260 // AT3G16800 // AT5G56040
GO:0071554	P	cell wall organization or biogenesis	14	608	704	28362	0.65	1	// AT1G05560 // AT1G64390 // AT5G65270 // AT3G29090 // AT3G55500 // AT5G15650 // AT3G43270 // AT1G69530 // AT5G15470 // AT5G62220 // AT3G56310 // AT1G26770 // AT5G62620 // AT3G49220
GO:0071555	P	cell wall organization	10	608	518	28362	0.67	1	// AT1G64390 // AT3G55500 // AT5G15650 // AT1G69530 // AT5G15470 // AT3G43270 // AT3G56310 // AT1G26770 // AT3G29090 // AT3G49220
GO:0010467	P	gene expression	81	608	4747	28362	0.99	1	// AT1G77680 // AT3G01170 // AT5G11260 // AT5G04760 // AT2G47570 // AT1G64380 // AT3G61890 // AT3G24520 // AT5G23290 // AT5G15840 // AT1G75410 // AT5G24660 // AT1G32870 // AT3G51960 // AT1G70600 // AT4G28140 // AT1G53160 // AT1G01030 // AT3G02190 // AT5G41010 // AT1G45249 // AT1G64810 // AT1G29160 // AT4G09180 // AT1G71130 // AT1G51140 // AT4G35040 // AT5G59570 // AT2G25650 // AT5G59820 // AT2G23…
GO:0010468	P	regulation of gene expression	63	608	2814	28362	0.38	1	// AT1G64380 // AT5G11260 // AT5G04760 // AT3G61890 // AT3G24520 // AT5G23290 // AT5G15840 // AT1G75410 // AT5G24660 // AT1G32870 // AT3G51960 // AT4G28140 // AT1G53160 // AT1G01030 // AT1G45249 // AT1G64810 // AT1G29160 // AT4G09180 // AT1G71130 // AT1G51140 // AT4G35040 // AT5G59570 // AT2G25650 // AT5G59820 // AT2G23340 // AT4G23050 // AT4G37790 // AT2G38250 // AT2G35940 // AT5G53450 // AT3G15…
GO:0019941	P	modification-dependent protein catabolic process	10	608	378	28362	0.3	1	// AT3G17000 // AT4G04210 // AT5G56150 // AT1G45050 // AT5G01720 // AT4G02890 // AT1G79110 // AT4G19700 // AT2G01150 // AT3G58040
GO:0044265	P	cellular macromolecule catabolic process	16	608	541	28362	0.13	1	// AT1G77680 // AT3G17000 // AT4G01610 // AT4G04210 // AT5G56150 // AT1G06430 // AT4G19700 // AT5G60360 // AT1G45050 // AT2G01150 // AT5G01720 // AT1G79110 // AT4G02890 // AT1G47128 // AT3G48350 // AT3G58040
GO:0044085	P	cellular component biogenesis	18	608	1095	28362	0.9	1	// AT1G77680 // AT1G05560 // AT1G64660 // AT1G55140 // AT2G42540 // AT4G15770 // AT5G65270 // AT3G09200 // AT5G15470 // AT3G17930 // AT5G15650 // AT1G52400 // AT2G18050 // AT1G64500 // AT1G20015 // AT5G08290 // AT5G51174 // AT1G78790
GO:0048285	P	organelle fission	5	608	257	28362	0.65	1	// AT5G24020 // AT1G05560 // AT5G66410 // AT5G08290 // AT1G78790
GO:0015031	P	protein transport	12	608	653	28362	0.74	1	// AT4G30600 // AT3G17780 // AT5G42570 // AT5G65270 // AT5G50460 // AT1G16920 // AT4G27840 // AT1G55690 // AT3G09900 // AT1G09330 // AT3G25040 // AT4G16370
GO:0098655	P	cation transmembrane transport	6	608	172	28362	0.17	1	// AT2G16510 // AT1G35720 // AT4G30190 // AT5G55290 // AT1G07430 // AT5G27150
GO:0080044	F	quercetin 7-O-glucosyltransferase activity	10	608	71	28362	7.6e-06	0.0031	// AT1G05560 // AT1G22400 // AT4G15490 // AT2G43820 // AT3G21560 // AT3G46670 // AT3G21750 // AT2G30140 // AT1G30530 // AT3G21780
GO:0080043	F	quercetin 3-O-glucosyltransferase activity	10	608	71	28362	7.6e-06	0.0031	// AT1G05560 // AT1G22400 // AT4G15490 // AT2G43820 // AT3G21560 // AT3G46670 // AT3G21750 // AT2G30140 // AT1G30530 // AT3G21780
GO:0016491	F	oxidoreductase activity	60	608	1547	28362	1.2e-05	0.0033	// AT1G65980 // AT4G34230 // AT3G49120 // AT3G14620 // AT3G24170 // AT1G62180 // AT4G22880 // AT4G37830 // AT3G20100 // AT2G33380 // AT2G25450 // AT2G39800 // AT3G01980 // AT3G55610 // AT5G19440 // AT1G17745 // AT2G23910 // AT4G16330 // AT4G39330 // AT4G04610 // AT4G33150 // AT2G33590 // ATCG00020 // AT2G46505 // AT5G52320 // AT1G06640 // AT3G20810 // AT5G01600 // AT3G28480 // AT5G05600 // AT1G06…
GO:0016620	F	oxidoreductase activity, acting on the aldehyde or oxo group of donors, NAD or NADP as acceptor	7	608	49	28362	0.00016	0.033	// AT4G30470 // AT5G14780 // AT2G33590 // AT1G54100 // AT2G39800 // AT3G55610 // AT2G23910
GO:0016903	F	oxidoreductase activity, acting on the aldehyde or oxo group of donors	8	608	74	28362	0.00033	0.042	// AT4G30470 // AT5G14780 // AT2G33590 // AT1G54100 // AT2G39800 // AT1G21400 // AT2G23910 // AT3G55610
GO:0035251	F	UDP-glucosyltransferase activity	11	608	137	28362	0.0003	0.042	// AT1G05560 // AT1G22400 // AT4G15490 // AT2G43820 // AT5G20830 // AT3G21560 // AT3G46670 // AT3G21750 // AT2G30140 // AT1G30530 // AT3G21780
GO:0004722	F	protein serine/threonine phosphatase activity	12	608	164	28362	0.00036	0.042	// AT3G05640 // AT4G26080 // AT2G25620 // AT2G42500 // AT3G20500 // AT1G72770 // AT3G11410 // AT3G16800 // AT2G30020 // AT5G57050 // AT1G07430 // AT1G64040
GO:0016667	F	oxidoreductase activity, acting on a sulfur group of donors	10	608	124	28362	0.00055	0.056	// AT3G24170 // AT1G62180 // AT1G08570 // AT2G30540 // AT1G64500 // AT4G04610 // AT4G15680 // AT1G19570 // AT4G21990 // AT1G28480
GO:0046527	F	glucosyltransferase activity	11	608	158	28362	0.00093	0.082	// AT1G05560 // AT1G22400 // AT4G15490 // AT2G43820 // AT5G20830 // AT3G21560 // AT3G46670 // AT3G21750 // AT2G30140 // AT1G30530 // AT3G21780
GO:0051213	F	dioxygenase activity	10	608	135	28362	0.001	0.082	// AT4G16330 // AT5G05600 // AT1G06570 // AT3G28480 // AT4G22880 // AT1G73680 // AT3G45140 // AT2G25450 // AT1G06640 // AT3G20810
GO:0015250	F	water channel activity	5	608	39	28362	0.0022	0.13	// AT5G18290 // AT4G00430 // AT2G37180 // AT2G39010 // AT2G37170
GO:0005372	F	water transmembrane transporter activity	5	608	39	28362	0.0022	0.13	// AT5G18290 // AT4G00430 // AT2G37180 // AT2G39010 // AT2G37170
GO:0016758	F	transferase activity, transferring hexosyl groups	18	608	382	28362	0.0022	0.13	// AT1G05560 // AT1G22400 // AT4G15490 // AT1G77810 // AT2G43820 // AT1G32210 // AT5G62620 // AT5G20830 // AT3G21560 // AT1G56600 // AT3G46670 // AT3G15350 // AT5G15470 // AT5G62220 // AT2G30140 // AT1G30530 // AT3G21780 // AT3G21750
GO:0004721	F	phosphoprotein phosphatase activity	12	608	203	28362	0.0021	0.13	// AT3G05640 // AT4G26080 // AT2G25620 // AT2G42500 // AT3G20500 // AT1G72770 // AT3G11410 // AT3G16800 // AT2G30020 // AT5G57050 // AT1G07430 // AT1G64040
GO:0043167	F	ion binding	107	608	3821	28362	0.0026	0.14	// AT1G64660 // AT2G33380 // AT2G25450 // AT4G30190 // AT3G08590 // AT2G01150 // AT1G54150 // ATCG00020 // AT5G33210 // AT3G03470 // AT2G12190 // AT5G16450 // AT1G64810 // AT3G20810 // AT5G05600 // AT5G49480 // AT5G62670 // AT5G57050 // AT5G51980 // AT4G19700 // AT1G51090 // AT4G22820 // AT4G15680 // AT1G64950 // AT1G56600 // AT4G01480 // AT3G16800 // AT4G26150 // AT1G79110 // AT3G58040 // AT3G49…
GO:0008194	F	UDP-glycosyltransferase activity	14	608	273	28362	0.0032	0.16	// AT1G05560 // AT1G22400 // AT4G15490 // AT2G43820 // AT5G20830 // AT3G21560 // AT1G56600 // AT3G46670 // AT3G15350 // AT5G15470 // AT2G30140 // AT1G30530 // AT3G21780 // AT3G21750
GO:0003824	F	catalytic activity	225	608	9101	28362	0.0062	0.3	// AT1G64660 // AT2G39020 // AT5G53120 // AT2G33380 // AT2G25450 // AT3G55610 // AT3G10870 // AT4G30190 // AT3G56310 // AT3G08590 // AT2G01150 // AT2G45920 // AT1G21750 // AT1G54150 // AT4G34230 // AT3G21780 // AT4G33080 // ATCG00020 // AT2G32520 // AT5G06370 // AT1G04990 // AT2G03760 // AT5G16450 // AT3G04240 // AT3G20810 // AT5G08290 // AT4G30600 // AT5G05600 // AT1G64390 // AT1G77810 // AT3G55…
GO:0005515	F	protein binding	100	608	3669	28362	0.0078	0.32	// AT5G11260 // AT5G53120 // AT4G30190 // AT4G04210 // AT2G01150 // AT1G21750 // AT2G27230 // AT1G51140 // ATCG00020 // AT1G26260 // AT5G62220 // AT2G35940 // AT5G49550 // AT3G57260 // AT3G47640 // AT3G23820 // AT5G57050 // AT1G20450 // AT3G04680 // AT3G16800 // AT4G26150 // AT5G58160 // AT3G58040 // AT5G23290 // AT1G07400 // AT5G24020 // AT1G72770 // AT1G01360 // AT1G52400 // AT1G17745 // AT2G43…
GO:0046872	F	metal ion binding	100	608	3673	28362	0.008	0.32	// AT2G33380 // AT2G25450 // AT4G30190 // AT3G08590 // AT2G01150 // AT1G54150 // ATCG00020 // AT5G33210 // AT3G03470 // AT2G12190 // AT5G16450 // AT1G64810 // AT3G20810 // AT5G05600 // AT5G49480 // AT5G62670 // AT5G57050 // AT5G51980 // AT4G19700 // AT1G51090 // AT4G22820 // AT4G15680 // AT1G64950 // AT1G56600 // AT4G01480 // AT1G66500 // AT4G26150 // AT1G79110 // AT3G58040 // AT3G49120 // AT4G27…
GO:0043169	F	cation binding	100	608	3678	28362	0.0083	0.32	// AT2G33380 // AT2G25450 // AT4G30190 // AT3G08590 // AT2G01150 // AT1G54150 // ATCG00020 // AT5G33210 // AT3G03470 // AT2G12190 // AT5G16450 // AT1G64810 // AT3G20810 // AT5G05600 // AT5G49480 // AT5G62670 // AT5G57050 // AT5G51980 // AT4G19700 // AT1G51090 // AT4G22820 // AT4G15680 // AT1G64950 // AT1G56600 // AT4G01480 // AT1G66500 // AT4G26150 // AT1G79110 // AT3G58040 // AT3G49120 // AT4G27…
GO:0015291	F	secondary active transmembrane transporter activity	15	608	338	28362	0.0082	0.32	// AT5G52450 // AT4G25640 // AT5G26340 // AT1G58360 // AT4G17550 // AT5G20380 // AT5G47560 // AT1G69870 // AT1G67300 // AT1G61890 // AT5G13740 // AT5G27150 // AT5G52050 // AT1G66760 // AT2G22500
GO:0001071	F	nucleic acid binding transcription factor activity	52	608	1730	28362	0.01	0.36	// AT5G29000 // AT1G64380 // AT5G11260 // AT5G04760 // AT3G61890 // AT3G24520 // AT5G15840 // AT1G75410 // AT3G51960 // AT4G28140 // AT1G53160 // AT1G01030 // AT1G45249 // AT1G03040 // AT1G29160 // AT4G09180 // AT1G71130 // AT1G51140 // AT4G35040 // AT5G59570 // AT5G59820 // AT2G23340 // AT4G37790 // AT2G38250 // AT2G35940 // AT3G20810 // AT4G35550 // AT5G49330 // AT3G13040 // AT5G37260 // AT2G46…
GO:0008514	F	organic anion transmembrane transporter activity	5	608	57	28362	0.0097	0.36	// AT1G58360 // AT2G25520 // AT4G32390 // AT2G22500 // AT5G47560
GO:0003700	F	transcription factor activity, sequence-specific DNA binding	52	608	1729	28362	0.01	0.36	// AT5G29000 // AT1G64380 // AT5G11260 // AT5G04760 // AT3G61890 // AT3G24520 // AT5G15840 // AT1G75410 // AT3G51960 // AT4G28140 // AT1G53160 // AT1G01030 // AT1G45249 // AT1G03040 // AT1G29160 // AT4G09180 // AT1G71130 // AT1G51140 // AT4G35040 // AT5G59570 // AT5G59820 // AT2G23340 // AT4G37790 // AT2G38250 // AT2G35940 // AT3G20810 // AT4G35550 // AT5G49330 // AT3G13040 // AT5G37260 // AT2G46…
GO:0008509	F	anion transmembrane transporter activity	9	608	164	28362	0.011	0.36	// AT4G32390 // AT1G58360 // AT5G61810 // AT5G50200 // AT5G47560 // AT1G69870 // AT2G25520 // AT5G24030 // AT2G22500
GO:0009055	F	electron carrier activity	10	608	196	28362	0.012	0.38	// AT4G27520 // AT4G37830 // AT3G27200 // ATCG00020 // AT2G30540 // AT1G64500 // AT4G15680 // AT1G22840 // ATCG00280 // AT1G28480
GO:0016791	F	phosphatase activity	14	608	327	28362	0.014	0.4	// AT3G05640 // AT5G24780 // AT2G25620 // AT5G24770 // AT3G20500 // AT1G72770 // AT2G42500 // AT3G11410 // AT3G16800 // AT2G30020 // AT5G57050 // AT1G07430 // AT1G64040 // AT4G26080
GO:0015036	F	disulfide oxidoreductase activity	6	608	87	28362	0.014	0.4	// AT3G24170 // AT2G30540 // AT1G64500 // AT4G15680 // AT1G28480 // AT1G19570
GO:0022857	F	transmembrane transporter activity	36	608	1146	28362	0.017	0.48	// AT4G37830 // AT4G17550 // AT4G38250 // AT5G18290 // AT5G65990 // AT1G61890 // AT4G30190 // AT4G16370 // AT1G19570 // AT5G52450 // AT1G58360 // AT2G37170 // AT2G37180 // AT1G67300 // AT5G13740 // AT4G00430 // AT2G39010 // AT5G26340 // AT5G47560 // AT5G62670 // AT1G69870 // AT2G25520 // AT5G24030 // AT5G27150 // AT5G52050 // AT1G66760 // AT1G03900 // AT4G32390 // AT4G25640 // AT5G61810 // AT5G50…
GO:0022838	F	substrate-specific channel activity	8	608	152	28362	0.02	0.54	// AT2G37180 // AT5G18290 // AT1G07430 // AT5G24030 // AT4G00430 // AT2G39010 // AT2G37170 // AT1G19570
GO:0015238	F	drug transmembrane transporter activity	5	608	73	28362	0.024	0.63	// AT5G52450 // AT5G52050 // AT1G66760 // AT1G61890 // AT4G25640
GO:0005342	F	organic acid transmembrane transporter activity	6	608	102	28362	0.026	0.64	// AT1G58360 // AT5G47560 // AT4G38250 // AT5G65990 // AT1G05940 // AT2G22500
GO:0046943	F	carboxylic acid transmembrane transporter activity	6	608	102	28362	0.026	0.64	// AT1G58360 // AT5G47560 // AT4G38250 // AT5G65990 // AT1G05940 // AT2G22500
GO:0015297	F	antiporter activity	8	608	161	28362	0.027	0.64	// AT4G25640 // AT5G52450 // AT1G61890 // AT5G13740 // AT5G27150 // AT5G52050 // AT1G66760 // AT2G22500
GO:0090484	F	drug transporter activity	5	608	77	28362	0.029	0.66	// AT5G52450 // AT5G52050 // AT1G66760 // AT1G61890 // AT4G25640
GO:0043168	F	anion binding	9	608	195	28362	0.029	0.66	// AT3G28480 // AT4G22880 // AT1G64660 // AT5G36160 // AT5G28030 // AT4G23600 // AT1G01360 // AT1G17745 // AT5G38530
GO:0015267	F	channel activity	8	608	171	28362	0.036	0.77	// AT2G37180 // AT5G18290 // AT1G07430 // AT5G24030 // AT4G00430 // AT2G39010 // AT2G37170 // AT1G19570
GO:0022803	F	passive transmembrane transporter activity	8	608	171	28362	0.036	0.77	// AT2G37180 // AT5G18290 // AT1G07430 // AT5G24030 // AT4G00430 // AT2G39010 // AT2G37170 // AT1G19570
GO:0043565	F	sequence-specific DNA binding	26	608	825	28362	0.037	0.78	// AT5G11260 // AT3G61890 // AT3G24520 // AT1G75410 // AT3G51960 // AT1G45249 // AT4G09180 // AT1G71130 // AT1G51140 // AT4G35040 // AT5G59820 // AT2G38250 // AT2G41240 // AT3G15790 // AT5G49330 // AT4G26150 // AT2G26150 // AT5G47640 // AT4G37790 // AT1G42990 // AT1G03970 // AT4G34590 // AT5G05410 // AT2G46680 // AT4G27410 // AT2G20880
GO:0042803	F	protein homodimerization activity	7	608	143	28362	0.039	0.78	// AT2G40080 // AT2G27230 // AT5G24020 // AT1G35720 // AT3G51960 // AT2G35940 // AT5G38530
GO:0016616	F	oxidoreductase activity, acting on the CH-OH group of donors, NAD or NADP as acceptor	7	608	143	28362	0.039	0.78	// AT4G39330 // AT5G14780 // AT2G37760 // AT4G34230 // AT2G22780 // AT5G19440 // AT1G17745
GO:0022891	F	substrate-specific transmembrane transporter activity	28	608	916	28362	0.043	0.84	// AT4G37830 // AT4G17550 // AT4G38250 // AT5G18290 // AT5G65990 // AT4G30190 // AT4G16370 // AT1G19570 // AT1G58360 // AT2G37180 // AT1G67300 // AT5G13740 // AT4G00430 // AT2G39010 // AT5G26340 // AT5G47560 // AT5G62670 // AT1G69870 // AT2G25520 // AT5G24030 // AT5G27150 // AT2G37170 // AT4G32390 // AT5G61810 // AT5G50200 // AT1G05940 // AT1G07430 // AT2G22500
GO:0016757	F	transferase activity, transferring glycosyl groups	21	608	654	28362	0.049	0.88	// AT2G18990 // AT5G66410 // AT1G22400 // AT4G15490 // AT1G77810 // AT3G04240 // AT2G43820 // AT1G32210 // AT5G62620 // AT5G20830 // AT1G05560 // AT3G21560 // AT1G56600 // AT3G46670 // AT3G15350 // AT5G15470 // AT5G62220 // AT2G30140 // AT1G30530 // AT3G21780 // AT3G21750
GO:0005215	F	transporter activity	40	608	1406	28362	0.047	0.88	// AT5G02270 // AT4G37830 // AT4G17550 // AT4G38250 // AT5G18290 // AT5G65990 // AT1G61890 // AT4G30190 // AT4G16370 // AT1G19570 // AT5G52450 // AT1G58360 // AT2G37170 // AT2G37180 // AT1G67300 // AT5G13740 // AT4G00430 // AT1G68570 // AT2G39010 // AT5G26340 // AT5G47560 // AT5G62670 // AT1G69870 // AT2G25520 // AT5G24030 // AT5G27150 // AT5G52050 // AT1G66760 // AT1G03900 // AT4G32390 // AT4G25…
GO:0042578	F	phosphoric ester hydrolase activity	14	608	391	28362	0.048	0.88	// AT3G05640 // AT5G24780 // AT2G25620 // AT5G24770 // AT3G20500 // AT1G72770 // AT2G42500 // AT3G11410 // AT3G16800 // AT2G30020 // AT5G57050 // AT1G07430 // AT1G64040 // AT4G26080
GO:0003677	F	DNA binding	64	608	2417	28362	0.05	0.89	// AT1G64380 // AT5G11260 // AT5G04760 // AT3G61890 // AT3G24520 // AT5G15840 // AT1G75410 // AT3G06410 // AT3G51960 // AT4G28140 // AT1G53160 // AT1G01030 // AT5G41010 // AT1G45249 // AT2G40970 // AT1G03040 // AT1G29160 // AT4G09180 // AT1G71130 // AT2G41870 // AT3G60110 // AT1G51140 // AT4G35040 // AT5G59570 // AT5G33210 // AT5G59820 // AT2G23340 // AT4G37790 // AT2G38250 // AT2G35940 // AT5G04…
GO:0030170	F	pyridoxal phosphate binding	5	608	92	28362	0.054	0.93	// AT1G64660 // AT5G28030 // AT4G23600 // AT5G36160 // AT5G38530
GO:0015075	F	ion transmembrane transporter activity	20	608	629	28362	0.058	0.98	// AT4G32390 // AT4G17550 // AT2G25520 // AT1G58360 // AT5G61810 // AT5G50200 // AT5G13740 // AT5G47560 // AT5G62670 // AT1G69870 // AT4G30190 // AT1G67300 // AT1G19570 // AT5G26340 // AT5G24030 // AT1G07430 // AT5G27150 // AT4G16370 // AT4G37830 // AT2G22500
GO:0098772	F	molecular function regulator	10	608	390	28362	0.33	1	// AT4G01026 // AT3G47380 // AT5G05110 // AT1G54040 // AT3G12145 // AT1G01360 // AT1G49620 // AT5G16450 // AT3G49220 // AT2G28060
GO:0032549	F	ribonucleoside binding	48	608	2617	28362	0.89	1	// AT5G02270 // AT3G54030 // AT3G01820 // AT3G17000 // AT5G24020 // AT5G56150 // AT1G06430 // AT2G39800 // AT1G45050 // AT3G55610 // AT4G30190 // AT5G06530 // AT1G20560 // AT4G25390 // AT2G43130 // AT5G65270 // AT4G39210 // AT2G04350 // AT4G02410 // AT3G28540 // AT1G16920 // AT3G08730 // AT5G58380 // AT4G23050 // AT1G08650 // AT5G53450 // AT4G30600 // AT5G17760 // AT3G22330 // AT3G09440 // AT3G09…
GO:0001067	F	regulatory region nucleic acid binding	11	608	455	28362	0.39	1	// AT5G11260 // AT5G49330 // AT1G29160 // AT4G09180 // AT1G51140 // AT1G45249 // AT2G26150 // AT5G05410 // AT4G26150 // AT2G41240 // AT5G04340
GO:0044212	F	transcription regulatory region DNA binding	11	608	452	28362	0.38	1	// AT5G11260 // AT5G49330 // AT1G29160 // AT4G09180 // AT1G51140 // AT1G45249 // AT2G26150 // AT5G05410 // AT4G26150 // AT2G41240 // AT5G04340
GO:0016818	F	hydrolase activity, acting on acid anhydrides, in phosphorus-containing anhydrides	18	608	817	28362	0.49	1	// AT4G30600 // AT5G02270 // AT2G43130 // AT5G06530 // AT5G17760 // AT2G16510 // AT5G24020 // AT3G22330 // AT2G18230 // AT5G60790 // AT1G06430 // AT1G03900 // AT4G01480 // AT2G01670 // AT4G30190 // AT3G28540 // AT5G62670 // AT3G58510
GO:0016684	F	oxidoreductase activity, acting on peroxide as acceptor	6	608	139	28362	0.086	1	// AT1G65980 // AT3G49120 // AT1G73680 // AT2G33380 // AT1G35720 // AT4G11600
GO:0032559	F	adenyl ribonucleotide binding	43	608	2364	28362	0.88	1	// AT5G02270 // AT3G54030 // AT2G04350 // AT3G17000 // AT5G24020 // AT5G56150 // AT1G06430 // AT2G39800 // AT1G45050 // AT3G55610 // AT4G30190 // AT5G06530 // AT1G20560 // AT4G25390 // AT4G39210 // AT3G01820 // AT3G28540 // AT3G08730 // AT5G58380 // AT4G23050 // AT1G08650 // AT5G53450 // AT4G02410 // AT5G17760 // AT3G22330 // AT3G09440 // AT4G33080 // AT5G46080 // AT3G04680 // AT3G01520 // AT5G62…
GO:0016817	F	hydrolase activity, acting on acid anhydrides	18	608	826	28362	0.51	1	// AT4G30600 // AT5G02270 // AT2G43130 // AT5G06530 // AT5G17760 // AT2G16510 // AT5G24020 // AT3G22330 // AT2G18230 // AT5G60790 // AT1G06430 // AT1G03900 // AT4G01480 // AT2G01670 // AT4G30190 // AT3G28540 // AT5G62670 // AT3G58510
GO:0005488	F	binding	270	608	12081	28362	0.2	1	// AT1G64380 // AT5G11260 // AT2G34160 // AT3G15352 // AT5G53120 // AT1G69295 // AT1G64660 // AT2G33380 // AT3G28540 // AT5G64730 // AT2G25450 // AT3G55610 // AT4G30190 // AT4G28140 // AT4G04210 // AT2G01150 // AT1G21750 // AT1G54150 // AT4G04610 // AT2G27230 // AT1G51140 // ATCG00020 // AT5G59570 // AT5G33210 // AT1G26260 // AT1G04990 // AT2G12190 // AT5G16450 // AT1G64810 // AT2G35940 // AT3G20…
GO:1901265	F	nucleoside phosphate binding	56	608	3370	28362	0.98	1	// AT5G02270 // AT3G54030 // AT3G01820 // AT3G24170 // AT3G17000 // AT5G24020 // AT5G56150 // AT1G06430 // AT5G64730 // AT2G39800 // AT1G45050 // AT3G55610 // AT4G30190 // AT5G06530 // AT1G17745 // AT1G20560 // AT4G25390 // AT2G43130 // AT5G65270 // AT4G39210 // AT2G04350 // AT4G02410 // AT3G28540 // AT1G16920 // AT3G08730 // AT5G58380 // AT4G23050 // AT1G08650 // AT5G53450 // AT3G15790 // AT4G30…
GO:0003779	F	actin binding	5	608	120	28362	0.12	1	// AT1G21980 // AT1G20450 // AT5G67470 // AT5G58160 // AT2G16700
GO:0017076	F	purine nucleotide binding	48	608	2633	28362	0.89	1	// AT5G02270 // AT3G54030 // AT3G01820 // AT3G17000 // AT5G24020 // AT5G56150 // AT1G06430 // AT2G39800 // AT1G45050 // AT3G55610 // AT4G30190 // AT5G06530 // AT1G20560 // AT4G25390 // AT2G43130 // AT5G65270 // AT4G39210 // AT2G04350 // AT4G02410 // AT3G28540 // AT1G16920 // AT3G08730 // AT5G58380 // AT4G23050 // AT1G08650 // AT5G53450 // AT4G30600 // AT5G17760 // AT3G22330 // AT3G09440 // AT3G09…
GO:0016787	F	hydrolase activity	72	608	3279	28362	0.43	1	// AT1G77680 // AT5G02270 // AT3G03640 // AT3G10870 // AT5G59480 // AT4G01610 // AT5G24020 // AT1G19670 // AT4G30900 // AT1G69295 // AT2G18230 // AT2G30550 // AT1G06430 // AT3G43270 // AT3G61200 // AT2G30020 // AT1G52400 // AT4G30190 // AT3G56310 // AT4G26080 // AT5G06530 // AT3G23810 // AT5G45950 // AT2G43130 // AT3G48690 // AT1G51590 // AT5G24780 // AT2G16510 // AT3G20500 // AT3G28540 // AT3G11…
GO:0016788	F	hydrolase activity, acting on ester bonds	30	608	1131	28362	0.14	1	// AT1G77680 // AT3G10870 // AT2G30550 // AT1G72770 // AT3G61200 // AT2G30020 // AT4G30900 // AT3G43270 // AT4G26080 // AT3G48690 // AT5G24780 // AT3G20500 // AT1G55140 // AT1G19670 // AT3G29090 // AT5G45950 // AT5G24770 // AT4G09490 // AT1G02660 // AT3G05640 // AT5G57050 // AT1G04990 // AT2G25620 // AT2G42500 // AT2G25910 // AT3G11410 // AT3G16800 // AT1G07430 // AT3G49220 // AT1G64040
GO:0004842	F	ubiquitin-protein transferase activity	9	608	387	28362	0.45	1	// AT1G54150 // AT3G17000 // AT5G56150 // AT1G45050 // AT5G01720 // AT2G45920 // AT4G19700 // AT2G01150 // AT3G58040
GO:0016773	F	phosphotransferase activity, alcohol group as acceptor	18	608	1072	28362	0.88	1	// AT4G23050 // AT4G02410 // AT3G54030 // AT3G04680 // AT5G53450 // AT3G08730 // AT4G33080 // AT5G58380 // AT2G36580 // AT1G71697 // AT5G10930 // AT5G56040 // AT1G21980 // AT1G08650 // AT4G13020 // AT4G11890 // AT2G30360 // AT5G51830
GO:0016772	F	transferase activity, transferring phosphorus-containing groups	26	608	1657	28362	0.96	1	// AT3G54030 // AT3G01820 // AT3G08730 // AT2G39800 // AT3G55610 // AT4G25390 // AT4G39210 // AT4G33080 // AT2G36580 // AT5G58380 // AT4G23050 // AT1G08650 // AT5G53450 // AT4G02410 // AT5G41010 // AT3G07700 // AT5G46080 // AT5G51830 // AT3G04680 // AT5G56040 // AT1G71697 // AT5G10930 // AT1G21980 // AT4G13020 // AT4G11890 // AT2G30360
GO:0000976	F	transcription regulatory region sequence-specific DNA binding	6	608	185	28362	0.21	1	// AT5G11260 // AT4G09180 // AT1G51140 // AT1G45249 // AT4G26150 // AT2G41240
GO:0000975	F	regulatory region DNA binding	11	608	455	28362	0.39	1	// AT5G11260 // AT5G49330 // AT1G29160 // AT4G09180 // AT1G51140 // AT1G45249 // AT2G26150 // AT5G05410 // AT4G26150 // AT2G41240 // AT5G04340
GO:0032555	F	purine ribonucleotide binding	48	608	2631	28362	0.89	1	// AT5G02270 // AT3G54030 // AT3G01820 // AT3G17000 // AT5G24020 // AT5G56150 // AT1G06430 // AT2G39800 // AT1G45050 // AT3G55610 // AT4G30190 // AT5G06530 // AT1G20560 // AT4G25390 // AT2G43130 // AT5G65270 // AT4G39210 // AT2G04350 // AT4G02410 // AT3G28540 // AT1G16920 // AT3G08730 // AT5G58380 // AT4G23050 // AT1G08650 // AT5G53450 // AT4G30600 // AT5G17760 // AT3G22330 // AT3G09440 // AT3G09…
GO:0032553	F	ribonucleotide binding	48	608	2664	28362	0.91	1	// AT5G02270 // AT3G54030 // AT3G01820 // AT3G17000 // AT5G24020 // AT5G56150 // AT1G06430 // AT2G39800 // AT1G45050 // AT3G55610 // AT4G30190 // AT5G06530 // AT1G20560 // AT4G25390 // AT2G43130 // AT5G65270 // AT4G39210 // AT2G04350 // AT4G02410 // AT3G28540 // AT1G16920 // AT3G08730 // AT5G58380 // AT4G23050 // AT1G08650 // AT5G53450 // AT4G30600 // AT5G17760 // AT3G22330 // AT3G09440 // AT3G09…
GO:0000166	F	nucleotide binding	56	608	3370	28362	0.98	1	// AT5G02270 // AT3G54030 // AT3G01820 // AT3G24170 // AT3G17000 // AT5G24020 // AT5G56150 // AT1G06430 // AT5G64730 // AT2G39800 // AT1G45050 // AT3G55610 // AT4G30190 // AT5G06530 // AT1G17745 // AT1G20560 // AT4G25390 // AT2G43130 // AT5G65270 // AT4G39210 // AT2G04350 // AT4G02410 // AT3G28540 // AT1G16920 // AT3G08730 // AT5G58380 // AT4G23050 // AT1G08650 // AT5G53450 // AT3G15790 // AT4G30…
GO:0000287	F	magnesium ion binding	5	608	118	28362	0.12	1	// AT4G30190 // AT4G01480 // AT5G17380 // AT2G18230 // AT2G36580
GO:0005509	F	calcium ion binding	9	608	266	28362	0.13	1	// AT5G28830 // AT1G51590 // AT4G26080 // AT1G52410 // AT5G61810 // AT5G49480 // AT2G33380 // AT1G35720 // AT2G44310
GO:0005506	F	iron ion binding	9	608	317	28362	0.25	1	// AT3G28480 // AT1G02205 // AT1G64950 // AT3G14620 // AT3G20100 // AT3G03470 // AT2G12190 // AT5G52320 // AT5G01600
GO:0005507	F	copper ion binding	8	608	238	28362	0.15	1	// AT4G27520 // AT3G09200 // AT3G27200 // AT1G35720 // AT1G22840 // AT3G15352 // AT4G23670 // AT1G19570
GO:0022890	F	inorganic cation transmembrane transporter activity	8	608	325	28362	0.4	1	// AT4G37830 // AT5G47560 // AT5G62670 // AT4G30190 // AT5G13740 // AT1G07430 // AT5G27150 // AT4G16370
GO:0008324	F	cation transmembrane transporter activity	11	608	464	28362	0.41	1	// AT5G26340 // AT4G37830 // AT4G17550 // AT5G47560 // AT5G62670 // AT4G30190 // AT1G67300 // AT5G13740 // AT1G07430 // AT5G27150 // AT4G16370
GO:0008289	F	lipid binding	5	608	317	28362	0.81	1	// AT2G38530 // AT1G35720 // AT5G59310 // AT2G42540 // AT1G27950
GO:0016853	F	isomerase activity	9	608	264	28362	0.12	1	// AT3G54960 // AT1G21750 // AT3G55920 // AT3G06950 // AT5G15650 // AT1G13280 // AT3G23820 // AT3G17940 // AT3G08590
GO:0004601	F	peroxidase activity	5	608	133	28362	0.17	1	// AT1G65980 // AT1G35720 // AT3G49120 // AT1G73680 // AT4G11600
GO:0001883	F	purine nucleoside binding	48	608	2612	28362	0.88	1	// AT5G02270 // AT3G54030 // AT3G01820 // AT3G17000 // AT5G24020 // AT5G56150 // AT1G06430 // AT2G39800 // AT1G45050 // AT3G55610 // AT4G30190 // AT5G06530 // AT1G20560 // AT4G25390 // AT2G43130 // AT5G65270 // AT4G39210 // AT2G04350 // AT4G02410 // AT3G28540 // AT1G16920 // AT3G08730 // AT5G58380 // AT4G23050 // AT1G08650 // AT5G53450 // AT4G30600 // AT5G17760 // AT3G22330 // AT3G09440 // AT3G09…
GO:0001882	F	nucleoside binding	48	608	2618	28362	0.89	1	// AT5G02270 // AT3G54030 // AT3G01820 // AT3G17000 // AT5G24020 // AT5G56150 // AT1G06430 // AT2G39800 // AT1G45050 // AT3G55610 // AT4G30190 // AT5G06530 // AT1G20560 // AT4G25390 // AT2G43130 // AT5G65270 // AT4G39210 // AT2G04350 // AT4G02410 // AT3G28540 // AT1G16920 // AT3G08730 // AT5G58380 // AT4G23050 // AT1G08650 // AT5G53450 // AT4G30600 // AT5G17760 // AT3G22330 // AT3G09440 // AT3G09…
GO:0003735	F	structural constituent of ribosome	8	608	391	28362	0.6	1	// AT3G01170 // AT2G47570 // AT3G09200 // AT2G40205 // AT3G08520 // AT3G02190 // AT1G70600 // AT1G23290
GO:0046983	F	protein dimerization activity	15	608	567	28362	0.24	1	// AT2G40080 // AT1G03040 // AT4G09180 // AT5G24020 // AT1G51140 // AT3G51960 // AT4G34590 // AT3G47640 // AT1G35720 // AT5G47640 // AT2G27230 // AT2G35940 // AT2G41240 // AT1G26260 // AT5G38530
GO:0070011	F	peptidase activity, acting on L-amino acid peptides	9	608	458	28362	0.65	1	// AT4G01610 // AT3G54130 // AT1G06430 // AT5G60360 // AT4G36760 // AT1G23440 // AT3G10450 // AT1G47128 // AT3G48350
GO:0004497	F	monooxygenase activity	5	608	305	28362	0.78	1	// AT1G64950 // AT3G14620 // AT5G52320 // AT3G20100 // AT3G03470
GO:0035639	F	purine ribonucleoside triphosphate binding	46	608	2515	28362	0.88	1	// AT5G02270 // AT3G54030 // AT3G01820 // AT3G17000 // AT5G24020 // AT5G56150 // AT1G06430 // AT2G39800 // AT1G45050 // AT3G55610 // AT4G30190 // AT5G06530 // AT4G25390 // AT2G43130 // AT5G65270 // AT4G39210 // AT2G04350 // AT4G02410 // AT3G28540 // AT1G16920 // AT3G08730 // AT5G58380 // AT4G23050 // AT1G08650 // AT5G53450 // AT4G30600 // AT5G17760 // AT3G22330 // AT3G09440 // AT3G09900 // AT4G33…
GO:0016740	F	transferase activity	78	608	3791	28362	0.67	1	// AT2G18990 // AT1G05560 // AT3G54030 // AT4G33080 // AT2G39020 // AT3G17000 // AT3G08730 // AT5G66410 // AT5G36160 // AT5G53120 // AT5G56150 // AT3G21560 // AT2G39800 // AT1G45050 // AT3G55610 // AT3G21750 // AT2G30140 // AT3G04240 // AT2G01150 // AT2G45920 // AT4G25390 // AT1G54150 // AT1G22400 // AT4G39210 // AT3G21780 // AT3G01820 // AT1G30530 // AT2G36580 // AT5G47430 // AT5G58380 // AT1G56…
GO:0016746	F	transferase activity, transferring acyl groups	8	608	408	28362	0.65	1	// AT1G07720 // AT2G39020 // AT5G55070 // AT5G13930 // AT2G32520 // AT3G10450 // AT5G06370 // AT5G39050
GO:0016747	F	transferase activity, transferring acyl groups other than amino-acyl groups	7	608	348	28362	0.62	1	// AT1G07720 // AT2G39020 // AT5G55070 // AT5G13930 // AT2G32520 // AT3G10450 // AT5G39050
GO:0016209	F	antioxidant activity	7	608	181	28362	0.1	1	// AT1G65980 // AT3G49120 // AT3G24170 // AT1G73680 // AT1G35720 // AT4G11600 // AT1G19570
GO:0022892	F	substrate-specific transporter activity	29	608	1045	28362	0.1	1	// AT4G37830 // AT4G17550 // AT4G38250 // AT5G18290 // AT5G65990 // AT4G30190 // AT4G16370 // AT1G19570 // AT1G58360 // AT2G37180 // AT1G67300 // AT5G13740 // AT4G00430 // AT2G39010 // AT5G26340 // AT5G47560 // AT5G62670 // AT1G69870 // AT2G25520 // AT5G24030 // AT5G27150 // AT5G52050 // AT2G37170 // AT4G32390 // AT5G61810 // AT5G50200 // AT1G05940 // AT1G07430 // AT2G22500
GO:0019001	F	guanyl nucleotide binding	5	608	301	28362	0.77	1	// AT4G30600 // AT1G16920 // AT2G43130 // AT3G09900 // AT5G65270
GO:0016705	F	oxidoreductase activity, acting on paired donors, with incorporation or reduction of molecular oxygen	9	608	407	28362	0.51	1	// AT4G16330 // AT4G22880 // AT3G28480 // AT1G64950 // AT3G14620 // AT3G20100 // AT1G06640 // AT3G03470 // AT5G52320
GO:0016798	F	hydrolase activity, acting on glycosyl bonds	9	608	438	28362	0.6	1	// AT1G64390 // AT1G51590 // AT3G03640 // AT1G69295 // AT3G57260 // AT1G52400 // AT3G56310 // AT3G06500 // AT3G23920
GO:0019899	F	enzyme binding	6	608	265	28362	0.5	1	// AT3G12580 // AT4G26080 // AT3G17000 // AT3G09440 // AT1G45050 // AT4G04210
GO:0004857	F	enzyme inhibitor activity	8	608	195	28362	0.065	1	// AT4G01026 // AT3G47380 // AT5G05110 // AT3G12145 // AT1G01360 // AT1G49620 // AT5G16450 // AT3G49220
GO:0032561	F	guanyl ribonucleotide binding	5	608	301	28362	0.77	1	// AT4G30600 // AT1G16920 // AT2G43130 // AT3G09900 // AT5G65270
GO:0044822	F	poly(A) RNA binding	6	608	337	28362	0.73	1	// AT4G35890 // AT3G58510 // AT3G06410 // AT5G51980 // AT2G37170 // AT1G04990
GO:0005516	F	calmodulin binding	6	608	252	28362	0.46	1	// AT3G25030 // AT4G23060 // AT5G35670 // AT1G12060 // AT5G27150 // AT1G08650
GO:0008092	F	cytoskeletal protein binding	7	608	270	28362	0.36	1	// AT1G20450 // AT1G45688 // AT5G66410 // AT5G58160 // AT2G16700 // AT1G21980 // AT5G67470
GO:0004175	F	endopeptidase activity	5	608	225	28362	0.53	1	// AT5G60360 // AT1G47128 // AT1G06430 // AT3G48350 // AT4G01610
GO:0016887	F	ATPase activity	13	608	530	28362	0.35	1	// AT5G02270 // AT5G17760 // AT2G16510 // AT5G24020 // AT3G22330 // AT3G28540 // AT5G60790 // AT1G06430 // AT1G03900 // AT5G06530 // AT4G30190 // AT5G62670 // AT3G58510
GO:1901363	F	heterocyclic compound binding	146	608	7718	28362	0.97	1	// AT1G64380 // AT5G11260 // AT2G34160 // AT3G28540 // AT5G64730 // AT3G55610 // AT4G30190 // AT4G28140 // AT5G51980 // AT2G27230 // AT1G51140 // ATCG00020 // AT5G59570 // AT5G33210 // AT1G26260 // AT1G04990 // AT2G12190 // AT1G64810 // AT2G35940 // AT5G04340 // AT4G30600 // AT5G56150 // AT3G47640 // AT3G01520 // AT2G40970 // AT4G22820 // AT4G36900 // AT3G04680 // AT1G64950 // AT3G06950 // AT3G57…
GO:0030246	F	carbohydrate binding	7	608	303	28362	0.48	1	// AT4G02410 // AT1G64390 // AT2G42540 // AT1G69295 // AT3G57260 // AT3G17940 // AT5G62620
GO:0004674	F	protein serine/threonine kinase activity	12	608	767	28362	0.9	1	// AT4G02410 // AT3G54030 // AT3G08730 // AT4G33080 // AT5G56040 // AT5G58380 // AT5G10930 // AT1G08650 // AT4G13020 // AT4G11890 // AT2G30360 // AT5G53450
GO:0004672	F	protein kinase activity	13	608	925	28362	0.96	1	// AT4G02410 // AT3G54030 // AT5G53450 // AT3G08730 // AT4G33080 // AT5G56040 // AT5G58380 // AT4G23050 // AT1G08650 // AT4G13020 // AT4G11890 // AT2G30360 // AT5G10930
GO:0017111	F	nucleoside-triphosphatase activity	15	608	766	28362	0.67	1	// AT4G30600 // AT5G02270 // AT2G43130 // AT5G17760 // AT2G16510 // AT5G24020 // AT3G22330 // AT3G28540 // AT5G60790 // AT1G06430 // AT1G03900 // AT5G06530 // AT4G30190 // AT5G62670 // AT3G58510
GO:0048037	F	cofactor binding	13	608	451	28362	0.18	1	// AT1G64660 // AT3G24170 // AT5G14780 // AT2G33590 // AT2G37760 // AT5G36160 // AT5G28030 // AT4G23600 // AT5G17380 // AT5G19440 // AT4G16760 // AT1G17745 // AT5G38530
GO:0046873	F	metal ion transmembrane transporter activity	5	608	235	28362	0.57	1	// AT1G07430 // AT5G27150 // AT4G16370 // AT5G47560 // AT5G13740
GO:0005525	F	GTP binding	5	608	282	28362	0.72	1	// AT4G30600 // AT1G16920 // AT2G43130 // AT3G09900 // AT5G65270
GO:0046906	F	tetrapyrrole binding	12	608	402	28362	0.16	1	// AT3G49120 // AT2G37970 // AT1G64950 // ATCG00020 // AT3G14620 // AT1G73680 // AT3G20100 // AT1G22840 // AT5G52320 // AT2G12190 // ATCG00280 // AT3G03470
GO:0003676	F	nucleic acid binding	81	608	4558	28362	0.97	1	// AT1G77680 // AT1G64380 // AT5G11260 // AT2G34160 // AT5G04760 // AT3G04620 // AT3G61890 // AT2G37170 // AT3G24520 // AT5G15840 // AT1G75410 // AT4G00270 // AT3G51960 // AT5G47430 // AT3G06410 // AT1G53160 // AT4G28140 // AT2G27230 // AT5G41010 // AT1G45249 // AT2G40970 // AT1G64810 // AT1G29160 // AT4G09180 // AT1G71130 // AT2G41870 // AT3G60110 // AT1G51140 // AT4G35040 // AT5G59570 // AT5G33…
GO:0042623	F	ATPase activity, coupled	8	608	389	28362	0.6	1	// AT3G58510 // AT5G24020 // AT3G22330 // AT5G62670 // AT1G03900 // AT5G06530 // AT4G30190 // AT1G06430
GO:0005524	F	ATP binding	41	608	2248	28362	0.88	1	// AT5G02270 // AT3G54030 // AT2G04350 // AT3G17000 // AT5G24020 // AT5G56150 // AT1G06430 // AT2G39800 // AT1G45050 // AT3G55610 // AT4G30190 // AT5G06530 // AT4G25390 // AT4G39210 // AT3G01820 // AT3G28540 // AT3G08730 // AT5G58380 // AT4G23050 // AT1G08650 // AT5G53450 // AT4G02410 // AT5G17760 // AT3G22330 // AT3G09440 // AT4G33080 // AT5G46080 // AT3G04680 // AT5G62670 // AT5G51830 // AT3G12…
GO:0016301	F	kinase activity	24	608	1436	28362	0.91	1	// AT3G54030 // AT3G01820 // AT3G08730 // AT2G39800 // AT3G55610 // AT4G25390 // AT4G33080 // AT2G36580 // AT5G58380 // AT4G23050 // AT1G08650 // AT5G53450 // AT4G02410 // AT3G07700 // AT5G46080 // AT5G51830 // AT3G04680 // AT5G56040 // AT1G71697 // AT5G10930 // AT1G21980 // AT4G13020 // AT4G11890 // AT2G30360
GO:0004553	F	hydrolase activity, hydrolyzing O-glycosyl compounds	9	608	405	28362	0.5	1	// AT1G64390 // AT1G51590 // AT3G03640 // AT1G69295 // AT3G57260 // AT1G52400 // AT3G56310 // AT3G06500 // AT3G23920
GO:0097159	F	organic cyclic compound binding	147	608	7737	28362	0.96	1	// AT1G64380 // AT5G11260 // AT2G34160 // AT3G28540 // AT5G64730 // AT3G55610 // AT4G30190 // AT4G28140 // AT2G40970 // AT2G27230 // AT1G51140 // ATCG00020 // AT5G59570 // AT5G33210 // AT1G26260 // AT1G04990 // AT2G12190 // AT1G64810 // AT2G35940 // AT5G04340 // AT4G30600 // AT5G56150 // AT3G47640 // AT3G01520 // AT5G51980 // AT4G22820 // AT4G36900 // AT3G04680 // AT1G64950 // AT3G06950 // AT3G57…
GO:0008233	F	peptidase activity	9	608	544	28362	0.82	1	// AT4G01610 // AT3G54130 // AT1G06430 // AT5G60360 // AT4G36760 // AT1G23440 // AT3G10450 // AT1G47128 // AT3G48350
GO:0008234	F	cysteine-type peptidase activity	5	608	128	28362	0.15	1	// AT3G54130 // AT1G47128 // AT5G60360 // AT3G48350 // AT4G01610
GO:1990837	F	sequence-specific double-stranded DNA binding	6	608	213	28362	0.31	1	// AT5G11260 // AT4G09180 // AT1G51140 // AT1G45249 // AT4G26150 // AT2G41240
GO:0003690	F	double-stranded DNA binding	7	608	315	28362	0.52	1	// AT5G11260 // AT4G09180 // AT1G51140 // AT1G45249 // AT4G26150 // AT2G41240 // AT1G78790
GO:0042802	F	identical protein binding	8	608	236	28362	0.14	1	// AT2G40080 // AT2G27230 // AT5G24020 // AT3G51960 // AT1G35720 // AT1G52400 // AT2G35940 // AT5G38530
GO:0020037	F	heme binding	10	608	360	28362	0.25	1	// AT3G49120 // AT2G37970 // AT1G64950 // AT3G14620 // AT1G73680 // AT3G20100 // AT1G22840 // AT5G52320 // AT2G12190 // AT3G03470
GO:0030554	F	adenyl nucleotide binding	43	608	2366	28362	0.89	1	// AT5G02270 // AT3G54030 // AT2G04350 // AT3G17000 // AT5G24020 // AT5G56150 // AT1G06430 // AT2G39800 // AT1G45050 // AT3G55610 // AT4G30190 // AT5G06530 // AT1G20560 // AT4G25390 // AT4G39210 // AT3G01820 // AT3G28540 // AT3G08730 // AT5G58380 // AT4G23050 // AT1G08650 // AT5G53450 // AT4G02410 // AT5G17760 // AT3G22330 // AT3G09440 // AT4G33080 // AT5G46080 // AT3G04680 // AT3G01520 // AT5G62…
GO:0004518	F	nuclease activity	6	608	356	28362	0.77	1	// AT1G77680 // AT4G09490 // AT4G30900 // AT1G55140 // AT2G25910 // AT1G04990
GO:0015077	F	monovalent inorganic cation transmembrane transporter activity	7	608	211	28362	0.18	1	// AT4G37830 // AT5G47560 // AT5G62670 // AT4G30190 // AT5G13740 // AT1G07430 // AT5G27150
GO:0030234	F	enzyme regulator activity	10	608	356	28362	0.24	1	// AT4G01026 // AT3G47380 // AT5G05110 // AT1G54040 // AT3G12145 // AT1G01360 // AT1G49620 // AT5G16450 // AT3G49220 // AT2G28060
GO:0036094	F	small molecule binding	61	608	3434	28362	0.95	1	// AT5G02270 // AT3G54030 // AT3G01820 // AT3G24170 // AT3G17000 // AT5G24020 // AT5G56150 // AT1G06430 // AT5G64730 // AT2G39800 // AT1G45050 // AT3G55610 // AT4G30190 // AT5G06530 // AT1G17745 // AT1G20560 // AT4G25390 // AT2G43130 // AT5G65270 // AT4G39210 // AT2G04350 // AT4G02410 // AT3G28540 // AT1G16920 // AT3G08730 // AT5G58380 // AT4G23050 // AT1G08650 // AT5G53450 // AT3G15790 // AT5G10…
GO:0032550	F	purine ribonucleoside binding	48	608	2612	28362	0.88	1	// AT5G02270 // AT3G54030 // AT3G01820 // AT3G17000 // AT5G24020 // AT5G56150 // AT1G06430 // AT2G39800 // AT1G45050 // AT3G55610 // AT4G30190 // AT5G06530 // AT1G20560 // AT4G25390 // AT2G43130 // AT5G65270 // AT4G39210 // AT2G04350 // AT4G02410 // AT3G28540 // AT1G16920 // AT3G08730 // AT5G58380 // AT4G23050 // AT1G08650 // AT5G53450 // AT4G30600 // AT5G17760 // AT3G22330 // AT3G09440 // AT3G09…
GO:0008270	F	zinc ion binding	21	608	1297	28362	0.93	1	// AT1G54150 // AT1G74250 // AT4G34230 // AT5G59820 // AT3G25030 // AT5G55070 // AT1G25250 // AT5G15840 // AT1G06430 // AT5G47430 // AT4G39330 // AT1G35720 // AT4G26150 // AT3G05250 // AT1G64810 // AT5G04340 // AT4G22820 // AT4G19700 // AT1G79110 // AT2G01150 // AT3G58040
GO:0019825	F	oxygen binding	6	608	234	28362	0.39	1	// AT1G64950 // AT3G14620 // AT3G20100 // AT3G03470 // AT2G12190 // AT5G52320
GO:0016614	F	oxidoreductase activity, acting on CH-OH group of donors	7	608	214	28362	0.18	1	// AT4G39330 // AT5G14780 // AT2G37760 // AT4G34230 // AT2G22780 // AT5G19440 // AT1G17745
GO:0097367	F	carbohydrate derivative binding	48	608	2696	28362	0.92	1	// AT5G02270 // AT3G54030 // AT3G01820 // AT3G17000 // AT5G24020 // AT5G56150 // AT1G06430 // AT2G39800 // AT1G45050 // AT3G55610 // AT4G30190 // AT5G06530 // AT1G20560 // AT4G25390 // AT2G43130 // AT5G65270 // AT4G39210 // AT2G04350 // AT4G02410 // AT3G28540 // AT1G16920 // AT3G08730 // AT5G58380 // AT4G23050 // AT1G08650 // AT5G53450 // AT4G30600 // AT5G17760 // AT3G22330 // AT3G09440 // AT3G09…
GO:0016765	F	transferase activity, transferring alkyl or aryl (other than methyl) groups	6	608	138	28362	0.084	1	// AT1G64660 // AT1G65820 // AT1G56430 // AT2G29450 // AT5G53120 // AT1G19570
GO:0022804	F	active transmembrane transporter activity	19	608	595	28362	0.061	1	// AT5G52450 // AT4G25640 // AT5G26340 // AT1G58360 // AT4G17550 // AT5G20380 // AT5G47560 // AT5G62670 // AT1G69870 // AT1G03900 // AT5G06530 // AT1G67300 // AT1G61890 // AT5G13740 // AT4G30190 // AT5G27150 // AT5G52050 // AT1G66760 // AT2G22500
GO:0019787	F	ubiquitin-like protein transferase activity	9	608	393	28362	0.47	1	// AT1G54150 // AT3G17000 // AT5G56150 // AT1G45050 // AT5G01720 // AT2G45920 // AT4G19700 // AT2G01150 // AT3G58040
GO:0016462	F	pyrophosphatase activity	17	608	809	28362	0.57	1	// AT4G30600 // AT5G02270 // AT2G43130 // AT5G06530 // AT5G17760 // AT2G16510 // AT5G24020 // AT3G22330 // AT2G18230 // AT5G60790 // AT1G06430 // AT1G03900 // AT4G01480 // AT4G30190 // AT3G28540 // AT5G62670 // AT3G58510
GO:0016829	F	lyase activity	12	608	406	28362	0.17	1	// AT1G64660 // AT3G44310 // AT1G11840 // AT5G57040 // AT5G28030 // AT4G23600 // AT3G57020 // AT5G17380 // AT4G34710 // AT5G16450 // AT1G02205 // AT5G38530
GO:0015294	F	solute:cation symporter activity	5	608	128	28362	0.15	1	// AT4G17550 // AT5G26340 // AT1G67300 // AT5G47560 // AT5G13740
GO:0015293	F	symporter activity	7	608	171	28362	0.082	1	// AT5G26340 // AT1G58360 // AT4G17550 // AT5G47560 // AT1G69870 // AT1G67300 // AT5G13740
GO:0052689	F	carboxylic ester hydrolase activity	9	608	314	28362	0.24	1	// AT3G48690 // AT5G45950 // AT2G30550 // AT1G02660 // AT3G10870 // AT3G43270 // AT1G19670 // AT3G29090 // AT3G49220
GO:0003723	F	RNA binding	15	608	1943	28362	1	1	// AT1G77680 // AT4G35890 // AT4G15770 // AT3G22330 // AT4G20030 // AT3G06950 // AT2G18110 // AT3G06410 // ATCG00250 // AT1G64810 // AT5G51980 // AT2G25910 // AT2G37170 // AT1G04990 // AT3G58510
GO:0003729	F	mRNA binding	6	608	337	28362	0.73	1	// AT4G35890 // AT3G58510 // AT3G06410 // AT5G51980 // AT2G37170 // AT1G04990
GO:0050662	F	coenzyme binding	8	608	281	28362	0.26	1	// AT3G24170 // AT5G14780 // AT2G33590 // AT2G37760 // AT5G17380 // AT5G19440 // AT4G16760 // AT1G17745
GO:0005198	F	structural molecule activity	13	608	538	28362	0.37	1	// AT3G01170 // AT1G26770 // AT3G20470 // AT2G47570 // AT3G09200 // AT2G40205 // AT3G08520 // AT4G04020 // AT1G23290 // AT4G22240 // AT5G52810 // AT1G70600 // AT3G02190
GO:0046914	F	transition metal ion binding	40	608	1912	28362	0.59	1	// AT3G27200 // AT4G27520 // AT5G59820 // AT3G20100 // AT5G15840 // AT1G06430 // AT3G08590 // AT2G01150 // AT1G54150 // AT4G34230 // AT5G55070 // AT5G47430 // AT5G52320 // AT2G12190 // AT3G05250 // AT1G64810 // AT4G22820 // AT3G28480 // AT1G74250 // AT3G09200 // AT4G39330 // AT1G22840 // AT3G15352 // AT4G23670 // AT4G19700 // AT3G03470 // AT5G04340 // AT4G08870 // AT1G02205 // AT1G64950 // AT3G25…
GO:0005737	C	cytoplasm	362	608	13406	28362	1.3e-09	7.2e-07	// AT2G39020 // AT5G18290 // AT3G55610 // AT2G01150 // ATCG00020 // AT2G35940 // AT3G20810 // AT4G00530 // AT5G49550 // AT2G41730 // AT3G23820 // AT1G19670 // AT4G19700 // AT1G20450 // AT1G68500 // AT3G06950 // AT4G01480 // AT1G05940 // AT1G65820 // AT3G57785 // AT2G17840 // AT1G62180 // AT1G07400 // AT3G21560 // AT2G39800 // AT1G52400 // AT3G25040 // AT3G27570 // AT4G39330 // AT2G41870 // AT4G23…
GO:0044464	C	cell part	538	608	22662	28362	1.7e-08	2e-06	// AT2G39020 // AT5G18290 // AT3G55610 // AT5G13370 // AT4G27410 // AT1G51140 // ATCG00020 // AT5G59570 // AT5G04080 // AT2G35940 // AT3G20810 // AT4G00530 // AT5G49550 // AT3G13480 // AT3G23820 // AT5G24030 // AT4G19700 // AT4G22820 // AT1G20450 // AT1G72690 // AT1G68500 // AT3G06950 // AT4G01480 // AT5G10930 // AT1G05940 // AT1G65820 // AT3G57785 // AT3G49220 // AT3G58040 // AT2G17840 // AT1G62…
GO:0005622	C	intracellular	503	608	20721	28362	1.7e-08	2e-06	// AT2G39020 // AT5G18290 // AT3G55610 // AT5G13370 // AT4G27410 // AT1G51140 // ATCG00020 // AT5G59570 // AT2G35940 // AT3G20810 // AT4G00530 // AT5G49550 // AT3G13480 // AT3G23820 // AT1G19670 // AT4G19700 // AT4G22820 // AT1G20450 // AT1G72690 // AT1G68500 // AT3G06950 // AT4G01480 // AT5G10930 // AT1G05940 // AT1G65820 // AT3G57785 // AT3G58040 // AT2G17840 // AT1G62180 // AT1G07400 // AT3G21…
GO:0005773	C	vacuole	64	608	1359	28362	9.2e-09	2e-06	// AT2G38530 // AT3G49120 // AT4G27520 // AT1G11840 // AT4G01610 // AT4G17550 // AT3G09440 // AT2G33380 // AT1G07080 // AT3G57020 // AT1G52400 // AT4G30190 // AT3G56310 // AT2G15970 // AT3G23810 // AT2G37970 // AT3G54960 // AT1G16920 // AT5G12010 // AT5G24780 // AT2G16510 // AT3G55920 // AT5G61820 // AT5G52450 // AT1G52410 // AT5G55290 // AT5G13930 // AT4G23630 // AT5G13740 // AT1G19670 // AT1G47…
GO:0005623	C	cell	538	608	22664	28362	1.8e-08	2e-06	// AT2G39020 // AT5G18290 // AT3G55610 // AT5G13370 // AT4G27410 // AT1G51140 // ATCG00020 // AT5G59570 // AT5G04080 // AT2G35940 // AT3G20810 // AT4G00530 // AT5G49550 // AT3G13480 // AT3G23820 // AT5G24030 // AT4G19700 // AT4G22820 // AT1G20450 // AT1G72690 // AT1G68500 // AT3G06950 // AT4G01480 // AT5G10930 // AT1G05940 // AT1G65820 // AT3G57785 // AT3G49220 // AT3G58040 // AT2G17840 // AT1G62…
GO:0044424	C	intracellular part	499	608	20693	28362	1.2e-07	1.1e-05	// AT2G39020 // AT5G18290 // AT3G55610 // AT5G13370 // AT4G27410 // AT1G51140 // ATCG00020 // AT5G59570 // AT2G35940 // AT3G20810 // AT4G00530 // AT5G49550 // AT3G13480 // AT3G23820 // AT1G19670 // AT4G19700 // AT4G22820 // AT1G20450 // AT1G72690 // AT1G68500 // AT3G06950 // AT4G01480 // AT1G05940 // AT1G65820 // AT3G57785 // AT3G58040 // AT2G17840 // AT1G62180 // AT1G07400 // AT3G21560 // AT2G39…
GO:0044444	C	cytoplasmic part	291	608	10923	28362	2.2e-06	0.00018	// AT1G76960 // AT2G34160 // AT2G39020 // AT4G16760 // AT1G64660 // AT2G33380 // AT5G18290 // AT4G33150 // ATCG00250 // AT1G79260 // AT3G55610 // AT3G08610 // AT4G30190 // AT3G56310 // AT4G04210 // AT5G13370 // AT1G21750 // AT1G70830 // AT1G54150 // AT4G04610 // AT3G17000 // AT2G43820 // AT1G55690 // AT3G56290 // AT1G45688 // ATCG00020 // AT4G15910 // AT1G55140 // AT5G01600 // AT1G67300 // AT2G03…
GO:0005829	C	cytosol	75	608	1993	28362	2.6e-06	0.00019	// AT1G65980 // AT5G23290 // AT3G50970 // AT3G44310 // AT1G11840 // AT4G01610 // AT5G36160 // AT5G20830 // AT1G64660 // AT3G17940 // AT1G79260 // AT3G55610 // AT5G19440 // AT1G70600 // AT2G30140 // AT1G17745 // AT4G04210 // AT5G13370 // AT3G27570 // AT2G43130 // AT3G48690 // AT2G47570 // AT4G33150 // AT3G11410 // AT4G34230 // AT3G08590 // AT2G34160 // AT2G32520 // AT2G36580 // AT2G37760 // AT2G44…
GO:0012505	C	endomembrane system	75	608	2143	28362	3e-05	0.0019	// AT2G38530 // AT1G05560 // AT3G49120 // AT3G17000 // AT1G45688 // AT1G32870 // AT3G09440 // AT2G33380 // AT5G18290 // AT1G07720 // AT1G55690 // AT5G19440 // AT1G52400 // AT4G30190 // AT3G25040 // AT4G16695 // AT2G37970 // AT3G54960 // AT1G21750 // AT2G43130 // AT1G51590 // AT1G03220 // AT1G71360 // AT4G21570 // AT2G04350 // AT1G27950 // AT5G26770 // AT2G25650 // AT1G16920 // AT1G22200 // AT5G55…
GO:0005783	C	endoplasmic reticulum	38	608	895	28362	9e-05	0.0051	// AT1G07720 // AT3G28480 // AT3G17000 // AT1G32870 // AT2G33380 // AT5G18290 // AT1G52400 // AT3G25040 // AT3G54960 // AT1G21750 // AT1G51590 // AT1G71360 // AT4G21570 // AT2G04350 // AT1G27950 // AT1G22200 // AT5G13930 // AT4G23630 // AT3G03640 // AT4G30600 // AT1G67360 // AT3G55920 // AT1G52410 // AT3G57260 // AT4G39730 // AT5G27150 // AT3G03470 // AT1G42990 // AT3G57020 // AT1G02205 // AT5G42…
GO:0016020	C	membrane	221	608	8532	28362	0.00061	0.031	// AT3G24315 // AT4G13530 // AT2G37170 // AT3G55500 // AT2G33380 // AT4G38250 // AT5G18290 // AT5G65990 // AT3G08610 // AT4G30190 // AT3G23810 // AT1G21750 // AT1G54150 // AT1G45688 // AT3G27210 // AT1G67300 // AT5G52320 // AT2G43540 // AT5G04080 // AT5G13930 // AT1G09330 // AT4G30600 // AT1G77810 // AT3G55920 // AT3G57260 // AT4G39730 // AT2G26150 // AT1G02660 // AT3G23820 // AT2G29020 // AT5G24…
GO:0009536	C	plastid	120	608	4213	28362	0.00076	0.036	// AT2G39020 // AT2G33380 // AT1G79260 // AT3G55610 // AT1G21750 // AT1G70830 // AT1G54150 // ATCG00020 // AT4G15910 // AT1G67300 // AT1G55140 // AT2G31560 // AT1G64810 // AT5G53650 // AT3G55920 // AT3G57260 // AT4G39730 // AT2G26150 // AT1G13990 // AT1G47640 // AT2G42540 // AT1G08530 // AT5G20380 // AT3G06950 // AT1G13280 // AT1G05940 // AT3G57785 // AT2G17840 // AT1G62180 // AT1G11840 // AT1G45…
GO:0009507	C	chloroplast	117	608	4148	28362	0.0013	0.051	// AT2G39020 // AT2G33380 // AT1G79260 // AT3G55610 // AT1G21750 // AT1G70830 // AT1G54150 // ATCG00020 // AT4G15910 // AT1G67300 // AT1G55140 // AT2G31560 // AT1G64810 // AT5G53650 // AT3G55920 // AT3G57260 // AT4G39730 // AT2G26150 // AT1G13990 // AT1G47640 // AT2G42540 // AT1G08530 // AT5G20380 // AT3G06950 // AT1G13280 // AT1G05940 // AT3G57785 // AT2G17840 // AT1G62180 // AT1G11840 // AT1G45…
GO:0005794	C	Golgi apparatus	42	608	1182	28362	0.0013	0.051	// AT2G38530 // AT3G28480 // AT3G49120 // AT5G65270 // AT3G09440 // AT1G55690 // AT5G19440 // AT4G30190 // AT3G25040 // AT4G16695 // AT1G77810 // AT2G43130 // AT1G51590 // AT1G03220 // AT2G04350 // AT1G27950 // AT2G25650 // AT1G16920 // AT5G55290 // AT1G09330 // AT2G03760 // AT5G62220 // AT1G47128 // AT5G16300 // AT1G05560 // AT1G45688 // AT2G37970 // AT3G55920 // AT5G15470 // AT5G15650 // AT5G25…
GO:0005886	C	plasma membrane	107	608	3735	28362	0.0013	0.051	// AT4G38250 // AT5G18290 // AT5G65990 // AT4G30190 // AT3G23810 // AT3G27210 // AT5G04080 // AT4G23630 // AT3G55920 // AT3G57260 // AT5G62670 // AT5G24030 // AT3G01520 // AT5G64730 // AT1G13280 // AT3G16800 // AT2G30360 // AT2G38530 // AT5G02270 // AT2G17840 // AT4G27520 // AT1G11840 // AT1G11960 // AT1G01360 // AT5G19440 // AT2G15970 // AT1G19570 // AT4G26080 // AT2G43130 // AT3G05640 // AT1G03…
GO:0071944	C	cell periphery	119	608	4309	28362	0.0023	0.078	// AT3G55500 // AT4G38250 // AT5G18290 // AT5G65990 // AT4G30190 // AT3G23810 // AT1G21750 // AT3G27210 // AT5G04080 // AT4G23630 // AT3G55920 // AT3G57260 // AT4G39730 // AT5G24030 // AT3G01520 // AT5G64730 // AT1G13280 // AT3G16800 // AT3G49220 // AT2G38530 // AT5G02270 // AT3G49120 // AT2G17840 // AT4G27520 // AT1G11840 // AT1G11960 // AT1G01360 // AT5G19440 // AT2G15970 // AT1G19570 // AT4G26…
GO:0043226	C	organelle	431	608	18527	28362	0.0022	0.078	// AT2G39020 // AT5G18290 // AT3G55610 // AT2G01150 // AT4G27410 // AT1G51140 // ATCG00020 // AT5G59570 // AT2G35940 // AT3G20810 // AT4G00530 // AT5G49550 // AT3G13480 // AT3G23820 // AT1G19670 // AT4G19700 // AT4G22820 // AT1G20450 // AT1G72690 // AT3G06950 // AT1G05940 // AT1G65820 // AT3G57785 // AT3G58040 // AT2G17840 // AT1G62180 // AT3G21560 // AT2G39800 // AT1G52400 // AT3G25040 // AT2G40…
GO:0043229	C	intracellular organelle	430	608	18517	28362	0.0028	0.082	// AT2G39020 // AT5G18290 // AT3G55610 // AT2G01150 // AT4G27410 // AT1G51140 // ATCG00020 // AT5G59570 // AT2G35940 // AT3G20810 // AT4G00530 // AT5G49550 // AT3G13480 // AT3G23820 // AT1G19670 // AT4G19700 // AT4G22820 // AT1G20450 // AT1G72690 // AT3G06950 // AT1G05940 // AT1G65820 // AT3G57785 // AT3G58040 // AT2G17840 // AT1G62180 // AT3G21560 // AT2G39800 // AT1G52400 // AT3G25040 // AT2G40…
GO:0000323	C	lytic vacuole	5	608	41	28362	0.0027	0.082	// AT1G21750 // AT1G47128 // AT5G60360 // AT3G48350 // AT4G01610
GO:0043227	C	membrane-bounded organelle	422	608	18217	28362	0.0044	0.13	// AT2G39020 // AT5G18290 // AT3G55610 // AT2G01150 // AT4G27410 // AT1G51140 // ATCG00020 // AT5G59570 // AT2G35940 // AT3G20810 // AT4G00530 // AT5G49550 // AT3G13480 // AT3G23820 // AT1G19670 // AT4G19700 // AT4G22820 // AT1G20450 // AT1G72690 // AT3G06950 // AT1G05940 // AT1G65820 // AT3G57785 // AT3G58040 // AT2G17840 // AT1G62180 // AT3G21560 // AT2G39800 // AT1G52400 // AT3G25040 // AT2G40…
GO:0005802	C	trans-Golgi network	13	608	256	28362	0.0048	0.13	// AT2G38530 // AT4G32390 // AT2G43130 // AT1G51590 // AT3G55920 // AT5G25610 // AT1G45688 // AT1G16920 // AT2G25520 // AT3G23820 // AT1G09330 // AT3G28480 // AT1G29790
GO:0043231	C	intracellular membrane-bounded organelle	421	608	18205	28362	0.0053	0.14	// AT2G39020 // AT5G18290 // AT3G55610 // AT2G01150 // AT4G27410 // AT1G51140 // ATCG00020 // AT5G59570 // AT2G35940 // AT3G20810 // AT4G00530 // AT5G49550 // AT3G13480 // AT3G23820 // AT1G19670 // AT4G19700 // AT4G22820 // AT1G20450 // AT1G72690 // AT3G06950 // AT1G05940 // AT1G65820 // AT3G57785 // AT3G58040 // AT2G17840 // AT1G62180 // AT3G21560 // AT2G39800 // AT1G52400 // AT3G25040 // AT2G40…
GO:0044431	C	Golgi apparatus part	22	608	567	28362	0.0071	0.18	// AT2G38530 // AT1G55690 // AT3G25040 // AT2G43130 // AT1G51590 // AT1G16920 // AT1G09330 // AT5G15470 // AT5G62220 // AT5G16300 // AT3G28480 // AT1G45688 // AT1G77810 // AT3G55920 // AT5G25610 // AT2G25520 // AT3G23820 // AT3G09900 // AT5G27150 // AT4G32390 // AT5G62620 // AT1G29790
GO:0005777	C	peroxisome	12	608	247	28362	0.009	0.21	// AT4G16330 // AT3G24170 // AT3G58510 // AT1G11840 // AT1G52410 // AT4G16760 // AT2G22780 // AT3G61200 // AT1G52400 // AT3G01980 // AT1G20560 // AT1G19570
GO:0042579	C	microbody	12	608	247	28362	0.009	0.21	// AT4G16330 // AT3G24170 // AT3G58510 // AT1G11840 // AT1G52410 // AT4G16760 // AT2G22780 // AT3G61200 // AT1G52400 // AT3G01980 // AT1G20560 // AT1G19570
GO:0048046	C	apoplast	19	608	486	28362	0.011	0.24	// AT3G49120 // AT4G39330 // AT3G12580 // AT4G27520 // AT3G09200 // AT5G09440 // AT4G23600 // AT3G09440 // AT3G57260 // AT1G35720 // AT3G17940 // AT3G44310 // AT4G13950 // AT3G56310 // AT1G47128 // AT3G08590 // AT4G11600 // AT1G19570 // AT1G55210
GO:0098791	C	Golgi subcompartment	13	608	303	28362	0.017	0.35	// AT2G38530 // AT4G32390 // AT2G43130 // AT1G51590 // AT3G55920 // AT5G25610 // AT1G45688 // AT1G16920 // AT2G25520 // AT3G23820 // AT1G09330 // AT3G28480 // AT1G29790
GO:0031984	C	organelle subcompartment	27	608	817	28362	0.021	0.42	// AT2G38530 // AT1G06430 // AT2G43130 // AT1G51590 // ATCG00020 // AT1G16920 // AT4G23630 // AT1G09330 // AT3G28480 // AT1G45688 // AT3G55920 // AT1G52410 // ATCG00630 // AT4G39730 // AT3G45140 // AT2G25520 // AT3G23820 // AT4G32390 // AT5G25610 // AT3G17930 // AT2G37400 // AT1G29395 // AT4G04020 // AT5G01600 // AT4G22240 // ATCG00280 // AT1G29790
GO:0044437	C	vacuolar part	24	608	725	28362	0.028	0.55	// AT3G49120 // AT3G09440 // AT4G30190 // AT3G54960 // AT1G21750 // AT5G12010 // AT2G16510 // AT1G16920 // AT5G13930 // AT1G09330 // AT5G13740 // AT5G52450 // AT3G28480 // AT5G47560 // AT4G39730 // AT1G22840 // AT4G17550 // AT5G27150 // AT5G52050 // AT3G12580 // AT5G42570 // AT4G25640 // AT1G35720 // AT1G05940
GO:0005911	C	cell-cell junction	28	608	901	28362	0.037	0.63	// AT5G20830 // AT3G09440 // AT2G25450 // AT3G55610 // AT5G19440 // AT1G52400 // AT4G30190 // AT1G70600 // AT3G08590 // AT1G23290 // AT1G03220 // AT4G16370 // AT5G26340 // AT4G16760 // AT2G29450 // AT1G47128 // AT3G09200 // AT5G09440 // AT1G69295 // AT3G44310 // AT4G13950 // AT2G37170 // AT1G20450 // AT5G42570 // AT1G58270 // AT2G12400 // AT1G35720 // AT1G12060
GO:0030054	C	cell junction	28	608	901	28362	0.037	0.63	// AT5G20830 // AT3G09440 // AT2G25450 // AT3G55610 // AT5G19440 // AT1G52400 // AT4G30190 // AT1G70600 // AT3G08590 // AT1G23290 // AT1G03220 // AT4G16370 // AT5G26340 // AT4G16760 // AT2G29450 // AT1G47128 // AT3G09200 // AT5G09440 // AT1G69295 // AT3G44310 // AT4G13950 // AT2G37170 // AT1G20450 // AT5G42570 // AT1G58270 // AT2G12400 // AT1G35720 // AT1G12060
GO:0009506	C	plasmodesma	28	608	899	28362	0.036	0.63	// AT5G20830 // AT3G09440 // AT2G25450 // AT3G55610 // AT5G19440 // AT1G52400 // AT4G30190 // AT1G70600 // AT3G08590 // AT1G23290 // AT1G03220 // AT4G16370 // AT5G26340 // AT4G16760 // AT2G29450 // AT1G47128 // AT3G09200 // AT5G09440 // AT1G69295 // AT3G44310 // AT4G13950 // AT2G37170 // AT1G20450 // AT5G42570 // AT1G58270 // AT2G12400 // AT1G35720 // AT1G12060
GO:0055044	C	symplast	28	608	899	28362	0.036	0.63	// AT5G20830 // AT3G09440 // AT2G25450 // AT3G55610 // AT5G19440 // AT1G52400 // AT4G30190 // AT1G70600 // AT3G08590 // AT1G23290 // AT1G03220 // AT4G16370 // AT5G26340 // AT4G16760 // AT2G29450 // AT1G47128 // AT3G09200 // AT5G09440 // AT1G69295 // AT3G44310 // AT4G13950 // AT2G37170 // AT1G20450 // AT5G42570 // AT1G58270 // AT2G12400 // AT1G35720 // AT1G12060
GO:0031090	C	organelle membrane	49	608	1760	28362	0.041	0.69	// AT3G28480 // AT3G49120 // AT5G24020 // AT4G37830 // AT3G09440 // AT2G33380 // AT1G55690 // AT3G08610 // AT4G30190 // AT3G25040 // AT3G54960 // AT1G16920 // AT2G43130 // AT1G54150 // AT5G12010 // AT2G16510 // AT1G51590 // AT5G52450 // AT2G46505 // AT5G13930 // AT1G09330 // AT5G13740 // AT5G62220 // AT5G03030 // AT1G67300 // AT4G30600 // AT1G77810 // AT5G15470 // AT5G47560 // AT4G39730 // AT3G22…
GO:0005774	C	vacuolar membrane	23	608	720	28362	0.043	0.69	// AT3G49120 // AT3G09440 // AT4G30190 // AT3G54960 // AT5G52450 // AT5G12010 // AT2G16510 // AT1G16920 // AT5G13930 // AT1G09330 // AT5G13740 // AT3G28480 // AT5G47560 // AT4G39730 // AT1G22840 // AT4G17550 // AT5G27150 // AT5G52050 // AT3G12580 // AT5G42570 // AT4G25640 // AT1G35720 // AT1G05940
GO:0015934	C	large ribosomal subunit	8	608	181	28362	0.047	0.74	// AT2G47570 // AT2G40205 // AT3G08520 // ATCG00960 // ATCG01170 // AT3G02190 // AT1G70600 // AT1G23290
GO:0098588	C	bounding membrane of organelle	35	608	1213	28362	0.051	0.79	// AT3G28480 // AT3G49120 // AT3G09440 // AT1G55690 // AT4G30190 // AT3G25040 // AT3G54960 // AT1G16920 // AT2G43130 // AT1G54150 // AT5G12010 // AT2G16510 // AT1G51590 // AT5G52450 // AT5G13930 // AT1G09330 // AT5G15470 // AT5G62220 // AT4G30600 // AT1G77810 // AT5G13740 // AT5G47560 // AT4G39730 // AT3G23820 // AT3G09900 // AT4G17550 // AT5G27150 // AT5G52050 // AT3G12580 // AT5G42570 // AT4G25…
GO:0044432	C	endoplasmic reticulum part	15	608	440	28362	0.059	0.85	// AT1G42990 // AT4G30600 // AT3G28480 // AT1G02205 // AT1G21750 // AT3G54960 // AT1G32210 // AT5G18290 // AT1G52410 // AT1G32870 // AT4G23630 // AT1G52400 // AT5G27150 // AT3G25040 // AT3G03470
GO:0070469	C	respiratory chain	6	608	125	28362	0.058	0.85	// AT4G37830 // AT3G22370 // AT2G46505 // AT1G22840 // AT3G08610 // AT3G57785
GO:0005768	C	endosome	14	608	405	28362	0.061	0.86	// AT2G38530 // AT4G32390 // AT1G51590 // AT5G49550 // AT5G65270 // AT3G55920 // AT5G25610 // AT1G16920 // AT2G25520 // AT3G23820 // AT1G09330 // AT3G28480 // AT5G52050 // AT1G29790
GO:0022626	C	cytosolic ribosome	11	608	323	28362	0.096	1	// AT3G08520 // AT2G47570 // AT3G09200 // AT5G24770 // AT5G55070 // AT2G40205 // AT3G09440 // AT5G15650 // AT3G02190 // AT1G70600 // AT1G23290
GO:0022625	C	cytosolic large ribosomal subunit	6	608	134	28362	0.075	1	// AT2G47570 // AT2G40205 // AT3G08520 // AT3G02190 // AT1G70600 // AT1G23290
GO:0034357	C	photosynthetic membrane	12	608	422	28362	0.2	1	// AT3G17930 // AT1G52410 // ATCG00630 // ATCG00020 // AT1G29395 // AT4G39730 // AT3G45140 // AT4G04020 // AT5G01600 // AT4G22240 // AT1G06430 // ATCG00280
GO:0044436	C	thylakoid part	13	608	463	28362	0.2	1	// AT3G17930 // AT2G37400 // AT1G52410 // ATCG00630 // ATCG00020 // AT1G29395 // AT4G39730 // AT3G45140 // AT4G04020 // AT5G01600 // AT4G22240 // AT1G06430 // ATCG00280
GO:0031976	C	plastid thylakoid	13	608	509	28362	0.3	1	// AT3G17930 // AT2G37400 // AT1G52410 // ATCG00630 // ATCG00020 // AT1G29395 // AT4G39730 // AT3G45140 // AT4G04020 // AT5G01600 // AT4G22240 // AT1G06430 // ATCG00280
GO:0005789	C	endoplasmic reticulum membrane	11	608	399	28362	0.25	1	// AT1G42990 // AT4G30600 // AT3G28480 // AT1G02205 // AT1G32210 // AT5G18290 // AT1G32870 // AT4G23630 // AT5G27150 // AT3G25040 // AT3G03470
GO:0044428	C	nuclear part	20	608	1078	28362	0.77	1	// AT5G41010 // AT5G67470 // AT3G04680 // AT3G58510 // AT1G23290 // AT3G09200 // AT1G52410 // AT3G22330 // AT3G09440 // AT5G26770 // AT1G71360 // AT1G49620 // AT4G00270 // AT1G07950 // AT1G64040 // AT2G38250 // AT2G41240 // AT5G08290 // AT5G51174 // AT1G78790
GO:0044429	C	mitochondrial part	11	608	486	28362	0.47	1	// AT5G61810 // AT3G22370 // AT2G46505 // AT5G03030 // AT1G21400 // AT3G15352 // AT3G08610 // AT3G57785 // AT1G22840 // AT4G37830 // AT2G22500
GO:0044425	C	membrane part	133	608	5962	28362	0.32	1	// AT3G24315 // AT4G13530 // AT4G38250 // AT5G18290 // AT5G65990 // AT3G08610 // AT4G30190 // AT1G54150 // ATCG00020 // AT1G67300 // AT5G52320 // AT2G43540 // AT5G62220 // AT1G64810 // AT5G53650 // AT1G09330 // AT4G30600 // AT1G77810 // AT3G57260 // AT5G62670 // AT2G26150 // AT1G02660 // AT3G23820 // AT2G29020 // AT5G24030 // AT5G64730 // AT1G08530 // AT5G20380 // AT1G05940 // AT1G65820 // AT3G57…
GO:0044421	C	extracellular region part	6	608	142	28362	0.092	1	// AT4G01610 // AT5G09440 // AT5G60360 // AT1G47128 // AT3G48350 // AT2G05520
GO:0044422	C	organelle part	118	608	4894	28362	0.092	1	// AT2G33380 // AT5G18290 // AT3G08610 // AT4G30190 // AT3G02190 // AT1G21750 // AT1G54150 // ATCG00020 // AT1G67300 // AT5G62220 // AT5G13930 // AT5G08290 // AT1G09330 // AT4G30600 // AT1G77810 // AT3G55920 // AT4G39730 // AT5G25610 // AT3G23820 // AT3G04680 // AT1G08530 // AT5G20380 // AT1G05940 // AT3G57785 // AT2G38530 // AT3G49120 // AT1G62180 // AT1G11840 // AT5G24020 // AT1G52400 // AT1G17…
GO:0009941	C	chloroplast envelope	16	608	688	28362	0.41	1	// AT1G54150 // AT1G08530 // AT2G37400 // AT1G11840 // AT5G24020 // AT2G04350 // AT1G29395 // AT5G20380 // AT2G33380 // AT1G06430 // AT3G45140 // AT1G08570 // AT1G67300 // AT1G05940 // AT2G42540 // AT4G19390
GO:0055035	C	plastid thylakoid membrane	12	608	401	28362	0.16	1	// AT3G17930 // AT1G52410 // ATCG00630 // ATCG00020 // AT1G29395 // AT4G39730 // AT3G45140 // AT4G04020 // AT5G01600 // AT4G22240 // AT1G06430 // ATCG00280
GO:0042175	C	nuclear outer membrane-endoplasmic reticulum membrane network	11	608	404	28362	0.26	1	// AT1G42990 // AT4G30600 // AT3G28480 // AT1G02205 // AT1G32210 // AT5G18290 // AT1G32870 // AT4G23630 // AT5G27150 // AT3G25040 // AT3G03470
GO:0031226	C	intrinsic component of plasma membrane	9	608	292	28362	0.18	1	// AT2G37180 // AT4G27520 // AT1G27950 // AT3G57260 // AT1G69295 // AT5G18290 // AT4G00430 // AT2G39010 // AT2G37170
GO:0030312	C	external encapsulating structure	20	608	706	28362	0.13	1	// AT1G21750 // AT3G49120 // AT3G12580 // AT3G20470 // AT1G35720 // AT5G14800 // AT3G22330 // AT3G55500 // AT3G57260 // AT5G15650 // AT3G43270 // AT1G27950 // AT5G52640 // AT3G09440 // AT1G69530 // AT1G26770 // AT3G29090 // AT3G49220 // AT5G67470 // AT1G03220
GO:0009526	C	plastid envelope	17	608	707	28362	0.35	1	// AT1G54150 // AT1G08530 // AT2G37400 // AT1G11840 // AT5G24020 // AT2G04350 // AT1G29395 // AT5G20380 // AT2G33380 // AT1G06430 // AT3G45140 // AT1G08570 // AT1G67300 // AT1G05940 // AT2G42540 // AT4G04020 // AT4G19390
GO:0019866	C	organelle inner membrane	10	608	371	28362	0.28	1	// AT5G24020 // AT5G61810 // AT1G29395 // AT3G22370 // AT2G46505 // AT5G03030 // AT3G08610 // AT3G57785 // AT4G37830 // AT2G22500
GO:0005615	C	extracellular space	5	608	103	28362	0.077	1	// AT5G60360 // AT1G47128 // AT5G09440 // AT3G48350 // AT4G01610
GO:0005618	C	cell wall	20	608	706	28362	0.13	1	// AT1G21750 // AT3G49120 // AT3G12580 // AT3G20470 // AT1G35720 // AT5G14800 // AT3G22330 // AT3G55500 // AT3G57260 // AT5G15650 // AT3G43270 // AT1G27950 // AT5G52640 // AT3G09440 // AT1G69530 // AT1G26770 // AT3G29090 // AT3G49220 // AT5G67470 // AT1G03220
GO:0070013	C	intracellular organelle lumen	23	608	1008	28362	0.41	1	// AT3G09440 // AT1G52400 // AT5G51174 // AT5G67470 // AT3G54960 // AT1G21750 // AT5G26770 // AT1G23290 // AT2G38250 // AT5G41010 // AT3G09200 // AT1G52410 // AT3G22330 // AT1G22840 // AT3G15352 // AT1G07950 // AT3G04680 // AT3G58510 // AT4G00270 // AT1G49620 // AT1G21400 // AT1G64040 // AT1G78790
GO:0031975	C	envelope	30	608	1170	28362	0.19	1	// AT1G11840 // AT5G24020 // AT4G37830 // AT2G33380 // AT1G06430 // AT3G08610 // AT1G54150 // AT2G04350 // AT5G26770 // AT2G46505 // AT5G03030 // AT1G67300 // AT1G52410 // AT3G45140 // AT1G22840 // AT3G15352 // AT2G42540 // AT3G22370 // AT1G08530 // AT2G37400 // AT1G08570 // AT5G61810 // AT1G29395 // AT5G20380 // AT4G04020 // AT1G71360 // AT1G05940 // AT3G57785 // AT2G22500 // AT4G19390
GO:0016021	C	integral component of membrane	120	608	5324	28362	0.29	1	// AT3G24315 // AT4G13530 // AT4G38250 // AT5G18290 // AT5G65990 // AT3G08610 // AT4G30190 // AT1G54150 // ATCG00020 // AT1G67300 // AT3G03470 // AT2G43540 // AT5G62220 // AT1G64810 // AT5G53650 // AT1G09330 // AT1G77810 // AT5G62670 // AT2G26150 // AT1G02660 // AT3G23820 // AT2G29020 // AT5G24030 // AT1G08530 // AT5G20380 // AT1G05940 // AT1G65820 // AT3G49220 // AT3G62450 // AT1G45688 // AT3G01…
GO:1902494	C	catalytic complex	11	608	711	28362	0.89	1	// AT5G41010 // AT4G26080 // AT5G55070 // AT1G32210 // AT5G57050 // AT1G78070 // AT5G64730 // AT2G46505 // AT3G08610 // AT3G57785 // AT1G64040
GO:0043234	C	protein complex	31	608	1834	28362	0.93	1	// AT1G77680 // AT5G23290 // AT4G37830 // AT5G57050 // AT1G78070 // AT5G64730 // AT3G08610 // AT4G26080 // AT5G41010 // ATCG00020 // AT2G46505 // AT5G55290 // AT2G38250 // AT2G41240 // AT5G16300 // AT4G30600 // AT5G49550 // AT5G55070 // ATCG00630 // AT3G22330 // AT2G18110 // AT1G07950 // AT2G18050 // AT3G04680 // AT1G32210 // AT5G38650 // AT4G26150 // AT3G57785 // ATCG00280 // AT1G64040 // AT1G78…
GO:0043232	C	intracellular non-membrane-bounded organelle	33	608	1543	28362	0.53	1	// AT1G77680 // AT3G01170 // AT5G67470 // AT2G47570 // ATCG00960 // AT3G09440 // AT2G33380 // AT1G70600 // AT1G23290 // AT5G41010 // AT5G55070 // AT3G02190 // AT5G66410 // AT2G38250 // AT1G47128 // AT1G05560 // AT1G67360 // AT3G09200 // AT5G24770 // AT2G40205 // AT3G22330 // AT3G08520 // AT5G15650 // AT2G16700 // AT2G18050 // AT1G64500 // AT1G20450 // AT3G58510 // AT4G00270 // ATCG01170 // AT1G64…
GO:0009505	C	plant-type cell wall	10	608	323	28362	0.17	1	// AT1G21750 // AT3G49120 // AT1G03220 // AT1G26770 // AT1G27950 // AT3G43270 // AT1G69530 // AT3G29090 // AT3G49220 // AT3G20470
GO:0009579	C	thylakoid	16	608	584	28362	0.2	1	// AT1G21750 // AT3G17930 // AT2G37400 // AT5G14780 // AT1G52410 // ATCG00630 // ATCG00020 // AT1G29395 // AT4G39730 // AT3G45140 // AT1G35720 // AT4G04020 // AT5G01600 // AT4G22240 // AT1G06430 // ATCG00280
GO:0009570	C	chloroplast stroma	15	608	740	28362	0.62	1	// AT4G04610 // AT2G42540 // AT1G62180 // AT1G35720 // AT5G24020 // ATCG00020 // AT4G04020 // AT3G45140 // AT1G08570 // AT5G01600 // AT4G22240 // AT1G17745 // ATCG00280 // AT3G17810 // AT1G19570
GO:0044435	C	plastid part	33	608	1455	28362	0.4	1	// AT1G62180 // AT1G11840 // AT5G24020 // AT2G33380 // AT1G06430 // AT1G17745 // AT1G19570 // AT1G54150 // AT1G35720 // AT2G04350 // ATCG00020 // AT1G67300 // AT1G52410 // ATCG00630 // ATCG00960 // AT4G39730 // AT3G45140 // AT2G42540 // AT3G17810 // AT4G04610 // AT3G17930 // AT1G08530 // AT2G37400 // AT1G08570 // AT1G29395 // AT5G20380 // AT4G04020 // ATCG01170 // AT5G01600 // AT1G05940 // AT4G22…
GO:0044391	C	ribosomal subunit	8	608	322	28362	0.39	1	// AT2G47570 // AT2G40205 // AT3G08520 // ATCG00960 // ATCG01170 // AT3G02190 // AT1G70600 // AT1G23290
GO:0042651	C	thylakoid membrane	12	608	421	28362	0.2	1	// AT3G17930 // AT1G52410 // ATCG00630 // ATCG00020 // AT1G29395 // AT4G39730 // AT3G45140 // AT4G04020 // AT5G01600 // AT4G22240 // AT1G06430 // ATCG00280
GO:0044459	C	plasma membrane part	10	608	428	28362	0.44	1	// AT5G64730 // AT4G27520 // AT1G27950 // AT3G57260 // AT1G69295 // AT5G18290 // AT2G37180 // AT4G00430 // AT2G39010 // AT2G37170
GO:0009535	C	chloroplast thylakoid membrane	12	608	400	28362	0.16	1	// AT3G17930 // AT1G52410 // ATCG00630 // ATCG00020 // AT1G29395 // AT4G39730 // AT3G45140 // AT4G04020 // AT5G01600 // AT4G22240 // AT1G06430 // ATCG00280
GO:0009534	C	chloroplast thylakoid	13	608	508	28362	0.3	1	// AT3G17930 // AT2G37400 // AT1G52410 // ATCG00630 // ATCG00020 // AT1G29395 // AT4G39730 // AT3G45140 // AT4G04020 // AT5G01600 // AT4G22240 // AT1G06430 // ATCG00280
GO:0009532	C	plastid stroma	17	608	774	28362	0.49	1	// AT4G04610 // AT1G35720 // AT2G42540 // AT1G62180 // ATCG01170 // AT5G24020 // ATCG00020 // ATCG00960 // AT4G04020 // AT3G45140 // AT1G08570 // AT5G01600 // AT4G22240 // AT1G17745 // ATCG00280 // AT3G17810 // AT1G19570
GO:0031974	C	membrane-enclosed lumen	23	608	1008	28362	0.41	1	// AT3G09440 // AT1G52400 // AT5G51174 // AT5G67470 // AT3G54960 // AT1G21750 // AT5G26770 // AT1G23290 // AT2G38250 // AT5G41010 // AT3G09200 // AT1G52410 // AT3G22330 // AT1G22840 // AT3G15352 // AT1G07950 // AT3G04680 // AT3G58510 // AT4G00270 // AT1G49620 // AT1G21400 // AT1G64040 // AT1G78790
[truncated: 31 more rows]

## Sheet: G3
G3 shoot_control_x_shoot_salt_all_FPUTR_top_5p_average
GO_acc	term_type	Term	queryitem	querytotal	bgitem	bgtotal	pvalue	FDR	entries
[truncated: 788 more rows]

## Sheet: G4
G4 shoot_control_x_shoot_salt_all_FPUTR_bot_5p_average
GO_acc	term_type	Term	queryitem	querytotal	bgitem	bgtotal	pvalue	FDR	entries
[truncated: 745 more rows]

## Sheet: G5
G5 shoot_control_x_shoot_salt_all_CDS_top_5p_average
GO_acc	term_type	Term	queryitem	querytotal	bgitem	bgtotal	pvalue	FDR	entries
[truncated: 684 more rows]

## Sheet: G6
G6 shoot_control_x_shoot_salt_all_CDS_bot_5p_average
[truncated: 713 more rows]

## Sheet: G7
G7 shoot_control_x_shoot_salt_all_TPUTR_top_5p_average
[truncated: 757 more rows]

[truncated: 33 more sheets: G8, G9, G10, G11, G12, G13, G14, G15, G16, G17, G18, G19, G20, G21, G22, G23, G24, G25, G26, G27 …]
