# Supplementary material
Source: HighWire-hosted journal article supplement (doi:10.1101/rna.072850.119)
Supplement: Supplemental_Data_5.xlsx [file Supplemental_Data_5.xlsx]

## Sheet: F0
Table	Contents
F0	Index of Folding Tables
F1	Shoot Control vs. Shoot Salt PPV, Whole Transcript
F2	Shoot Control vs. Shoot Salt PPV, 5’ UTR
F3	Shoot Control vs. Shoot Salt PPV, CDS
F4	Shoot Control vs. Shoot Salt PPV, 3’ UTR
F5	Root Control vs. Root Salt PPV, Whole Transcript
F6	Root Control vs. Root Salt PPV, 5’ UTR
F7	Root Control vs. Root Salt PPV, CDS
F8	Root Control vs. Root Salt PPV, 3’ UTR

## Sheet: F1
F1 Shoot Control vs. Shoot Salt PPV, Whole Transcript
transcript	sensitivity	PPV
AT1G01020.1	58.46	59.47
AT1G01020.2	28.41	28.9
AT1G01030.1	93.93	94.1
AT1G01050.1	60.13	60.13
AT1G01080.1	32.36	33.67
AT1G01080.2	31.5	33.25
AT1G01090.1	25.1	25
AT1G01100.1	47.47	47.24
AT1G01100.2	98.57	97.64
AT1G01100.3	98.94	98.42
AT1G01100.4	83	80.19
AT1G01120.1	39.23	38.26
AT1G01130.1	21.19	21.01
AT1G01140.1	30.17	30.57
AT1G01140.2	48.42	49.25
AT1G01140.3	35.29	36.09
AT1G01160.1	47.3	44.74
AT1G01160.2	58.59	59.43
AT1G01170.1	87.07	86.49
AT1G01170.2	75.68	80
AT1G01210.1	20.9	21.94
AT1G01220.1	43.97	44.83
AT1G01230.1	75.09	74.44
AT1G01240.1	45.59	45.25
AT1G01240.2	83.26	82.71
AT1G01240.3	35.76	35.53
AT1G01290.1	49.02	48.88
AT1G01290.2	34.55	34.44
AT1G01300.1	48.83	49.54
AT1G01350.1	74	74.66
AT1G01360.1	55.99	56.71
AT1G01430.1	45.03	44.4
AT1G01440.1	48.61	49.3
AT1G01448.1	63.95	64.63
AT1G01470.1	88.53	88.13
AT1G01490.1	55.62	54.83
AT1G01490.2	56.96	59.21
AT1G01500.1	58.61	58.86
AT1G01510.1	55.16	55.71
AT1G01540.1	54.5	55.02
AT1G01540.2	46.77	46.7
AT1G01550.1	60.21	60.73
AT1G01550.2	57.17	55.46
AT1G01610.1	28.42	27.95
AT1G01620.1	59.86	60.58
AT1G01620.2	65.68	63.33
AT1G01630.1	33.52	32.8
AT1G01710.1	53.36	52.38
AT1G01730.1	38.72	39.93
AT1G01770.1	38.68	38.33
AT1G01780.1	43.77	43.48
AT1G01790.1	74.77	74.19
AT1G01800.1	45.48	43.16
AT1G01800.2	58.66	57.69
AT1G01820.1	57.4	56.72
AT1G01830.1	45.79	45.45
AT1G01830.2	59.42	59.51
AT1G01830.3	55.94	54.89
AT1G01840.1	71.43	70.08
AT1G01860.1	53.76	54.98
AT1G01910.1	50.11	49.56
AT1G01910.2	48.25	47.09
AT1G01910.3	37.32	36.36
AT1G01910.4	25.51	25.51
AT1G01910.5	58.14	57.37
AT1G01920.2	54.71	55.79
AT1G01930.1	44.91	45.61
AT1G01940.1	39.01	38.33
AT1G01950.1	37.37	36.95
AT1G01950.2	38.16	38.36
AT1G01950.3	41.79	42.25
AT1G01970.1	64.04	64.04
AT1G01990.1	37.87	37.98
AT1G02000.1	63.72	63.94
AT1G02020.1	29.84	29.63
AT1G02020.2	32.42	32.02
AT1G02050.1	66.74	66.74
AT1G02090.1	47.06	46.65
AT1G02090.2	46.43	46.57
AT1G02090.3	51.85	50
AT1G02100.1	78.29	78.78
AT1G02100.2	23.96	23.96
AT1G02100.3	15.26	15.26
AT1G02110.1	29.5	29.34
AT1G02120.1	49.54	50.87
AT1G02130.1	35.11	34.15
AT1G02140.1	36.02	33.86
AT1G02145.1	39.51	39.59
AT1G02145.2	43.97	42.83
AT1G02145.3	37.45	37.31
AT1G02145.4	45.44	44.88
AT1G02150.1	52.83	53.69
AT1G02160.1	90.97	92.16
AT1G02160.2	55.14	55.43
AT1G02170.1	37.86	37.86
AT1G02205.1	48.83	48.63
AT1G02205.2	31.13	30.9
AT1G02205.3	37.15	36.74
AT1G02270.1	29.59	29.37
AT1G02280.1	49.87	49.23
AT1G02280.2	25.4	24.87
AT1G02300.1	71.6	71.96
AT1G02305.1	42.48	41.56
AT1G02330.1	71.79	70.81
AT1G02335.1	77.61	77.31
AT1G02410.1	26.51	27.15
AT1G02450.1	89.35	90.42
AT1G02475.1	54.76	56.1
AT1G02500.1	66.39	65.56
AT1G02500.2	65.14	64.33
AT1G02560.1	57.14	57.14
AT1G02610.1	41.38	41.81
AT1G02660.1	31.25	31.11
AT1G02680.1	26.14	25.75
AT1G02730.1	64.05	63.23
AT1G02750.1	73.54	73.85
AT1G02750.2	84.62	86.19
AT1G02780.1	64.92	63.55
AT1G02840.1	66.34	64.75
AT1G02840.2	68.51	67.71
AT1G02840.3	66.83	66.02
AT1G02860.1	40.56	40.96
AT1G02870.1	66.92	66.67
AT1G02880.3	40.62	40.62
AT1G02880.4	43.06	42.34
AT1G02890.1	46.11	45.86
AT1G02890.2	55.03	54.83
AT1G02910.1	56.3	56.52
AT1G02920.1	29.86	30.39
AT1G02930.1	63.22	61.18
AT1G02930.2	50.19	48.89
AT1G02960.1	38.17	38.63
AT1G02960.2	40.79	40.87
AT1G02960.3	66.23	68.39
AT1G02990.1	39.16	38.52
AT1G02990.2	38.51	37.8
AT1G02990.3	38.63	37.98
AT1G03030.1	50.23	50.79
AT1G03040.1	40.31	39.53
AT1G03040.2	74.16	73.35
AT1G03090.1	46.63	46.98
AT1G03090.2	39.59	39.64
AT1G03130.1	57.98	57.75
AT1G03140.1	44.42	44.7
AT1G03150.1	75.85	73.66
AT1G03160.1	37.28	38.37
AT1G03160.2	39.65	40.52
AT1G03220.1	54.98	54.19
AT1G03230.1	53.65	56.24
AT1G03250.1	71.5	73.8
AT1G03250.2	54.57	57.49
AT1G03280.1	68.12	69.12
AT1G03290.1	37.27	37.27
AT1G03290.2	39.23	38.62
AT1G03300.1	25.99	25.19
AT1G03330.1	41.28	42.17
AT1G03350.1	58.57	57.76
AT1G03360.1	38	38.35
AT1G03365.1	38.78	38.59
AT1G03370.1	37.5	38.28
AT1G03380.1	51.49	51.7
AT1G03400.1	42.19	41.29
AT1G03410.1	61.65	62.34
AT1G03430.1	50.15	48.37
AT1G03470.1	18.56	18.12
AT1G03470.2	60.57	59.8
AT1G03475.1	62.36	61.4
AT1G03530.1	31.8	31.72
AT1G03560.1	69.12	69.02
AT1G03590.1	23.9	24.38
AT1G03600.1	49.34	47.68
AT1G03610.1	61.06	61.4
AT1G03630.1	48.02	48.24
AT1G03630.2	56.91	55.86
AT1G03680.1	92.16	91.48
AT1G03740.1	34.27	34.52
AT1G03740.2	51.71	51.71
AT1G03760.1	51.05	50.46
AT1G03770.1	38.19	39.51
AT1G03780.1	44.55	44.72
AT1G03780.2	42.86	42.97
AT1G03780.3	48.19	48.82
AT1G03820.1	19.4	19.92
AT1G03830.1	54.29	55.02
AT1G03830.2	61.37	61.9
AT1G03860.1	40.41	40
AT1G03860.2	44.57	47.54
AT1G03860.3	71.24	75.12
AT1G03870.1	54.75	58.39
AT1G03900.1	65.89	65.04
AT1G03910.1	29.14	28.83
AT1G03910.2	79.38	79.08
AT1G03930.1	44.31	43.57
AT1G03950.1	41.75	41.61
AT1G03970.1	57.58	57.26
AT1G04040.1	56.23	58.54
AT1G04070.1	62.26	61.4
AT1G04080.1	34.6	34.25
AT1G04080.2	36.59	35.8
AT1G04080.3	75.31	74.05
AT1G04140.1	58.73	59.66
AT1G04140.2	55.54	55.94
AT1G04170.1	57.24	57.04
AT1G04190.1	47.51	48.19
AT1G04200.1	49.6	49.65
AT1G04230.1	27.7	27.19
AT1G04240.1	50.92	51.74
AT1G04250.1	43.21	43.82
AT1G04260.1	46.67	46.35
AT1G04270.1	56.85	59
AT1G04270.2	69.72	72.02
AT1G04280.1	40.13	40.36
AT1G04290.1	62.41	61.54
AT1G04300.1	47.86	49.16
AT1G04300.2	43.91	43.87
AT1G04300.3	54	54.89
AT1G04300.4	38.7	39.01
AT1G04340.1	85.51	87.41
AT1G04350.1	39.48	38.41
AT1G04400.1	72.63	73.17
AT1G04400.2	50.2	49.21
AT1G04410.1	69.68	70.24
AT1G04420.1	46.4	45.82
AT1G04430.1	52.22	51.63
AT1G04430.2	38.08	37.99
AT1G04440.1	34.88	34.78
AT1G04457.1	100	100
AT1G04480.1	75.23	74.88
AT1G04510.1	41.67	43.3
AT1G04510.2	31.54	32.52
AT1G04520.1	43.19	41.65
AT1G04530.1	46.31	47.41
AT1G04550.1	67.01	66.6
AT1G04550.2	63.49	63.79
AT1G04590.1	46.43	45.35
AT1G04590.2	63.32	63.47
AT1G04620.1	76.45	75.86
AT1G04630.1	18.91	17.86
AT1G04635.1	76.26	76.26
AT1G04640.1	52.74	53.1
AT1G04640.2	51.08	51.78
AT1G04680.1	47.32	46.08
AT1G04690.1	77.94	76.96
AT1G04710.1	72.76	72.71
AT1G04750.1	48.3	48.17
AT1G04750.2	65.25	64.61
AT1G04770.1	88.45	86.63
AT1G04780.1	54.76	54.23
AT1G04790.1	54.4	54.84
AT1G04800.1	54.09	57.44
AT1G04810.1	60.26	59.87
AT1G04820.1	68.83	69.2
AT1G04830.1	50.93	52.1
AT1G04850.1	60.43	59.28
AT1G04860.1	55.22	56.26
AT1G04870.1	51.07	51.07
AT1G04870.2	43.56	43.89
AT1G04900.1	36.79	35.83
AT1G04910.1	56.87	56.6
AT1G04940.1	49.44	49.86
AT1G04950.1	41.38	40
AT1G04950.2	40.87	40.38
AT1G04950.3	47.35	45.74
AT1G04960.1	58.5	58.24
AT1G04960.2	76.64	75.79
AT1G04980.1	21.88	22.05
AT1G04985.1	63.87	65.35
AT1G04990.2	28.97	28.35
AT1G05010.1	77.7	78.77
AT1G05060.1	42.49	41.56
AT1G05070.1	89.13	90.44
AT1G05120.1	47	46.15
AT1G05135.1	76.05	77.19
AT1G05140.1	46.52	45.67
AT1G05150.1	72.08	71.86
AT1G05180.1	46.53	46.18
AT1G05180.2	51.91	52.08
AT1G05180.3	83.49	83.59
AT1G05190.1	92.28	94.83
AT1G05205.1	62.16	64.97
AT1G05270.1	64.91	65.34
AT1G05320.1	55.83	55.42
AT1G05320.2	55.54	54.99
AT1G05320.3	29.4	28.98
AT1G05350.1	34.66	35.53
AT1G05380.1	47.21	47.56
AT1G05380.2	47.13	47.27
AT1G05385.1	61.94	64.83
AT1G05410.1	48.32	47.4
AT1G05410.2	72.96	73.1
AT1G05430.1	74.64	76.4
AT1G05460.1	54.78	55.23
AT1G05500.1	52.1	53.1
AT1G05560.1	83.64	84.56
AT1G05562.1	79.24	78.3
AT1G05590.1	43.53	44.27
AT1G05630.1	50.9	50.31
AT1G05630.2	43.34	43.23
AT1G05720.1	67.87	66.02
AT1G05780.1	67.73	66.82
AT1G05790.1	75.65	75.03
AT1G05790.2	60.24	59.59
AT1G05805.1	32.66	33.26
AT1G05810.1	88.11	89.05
AT1G05830.1	32.54	32.02
AT1G05830.2	36.92	36.29
AT1G05840.1	49.2	49.12
AT1G05850.1	51.2	52.81
AT1G05870.1	43.01	42.86
AT1G05870.2	59.17	59.46
AT1G05870.3	72.09	72.28
AT1G05870.4	70.63	70.47
AT1G05890.1	35.35	36.45
AT1G05890.2	45.21	46.09
AT1G05910.1	64.62	64.92
AT1G05940.1	44.11	44.46
AT1G05960.1	74.29	74.42
AT1G05960.2	39.52	39.71
AT1G06002.1	58.71	59.48
AT1G06010.1	72.82	71.77
AT1G06040.1	45.69	46.54
AT1G06040.2	46.36	47.04
AT1G06060.1	53.62	51.97
AT1G06070.1	51.77	52.49
AT1G06110.1	76.85	76.95
AT1G06130.1	42.09	42.47
AT1G06130.2	40.09	40.37
AT1G06149.1	58.87	58.56
AT1G06150.2	58.87	58.56
AT1G06190.1	30.94	30.74
AT1G06190.2	14.66	14.58
AT1G06200.1	62.82	62.82
AT1G06210.1	48.35	46.41
AT1G06210.2	68.7	66.54
AT1G06220.1	47.2	46.44
AT1G06220.2	48.39	47.53
AT1G06230.1	47.48	47.67
AT1G06230.2	43.34	42.7
AT1G06230.3	40.87	40.41
AT1G06290.1	47.71	46.92
AT1G06360.1	82.15	84.82
AT1G06380.1	72.67	71.75
AT1G06390.1	40.26	41.76
AT1G06390.2	78.59	79.68
AT1G06400.1	55.48	54.43
AT1G06410.1	47.86	48.6
AT1G06420.1	42.3	42.02
AT1G06420.2	57.56	55.71
AT1G06430.1	52.09	51.8
AT1G06460.1	43.84	43.96
AT1G06470.1	51.85	51.25
AT1G06470.2	45.86	45.85
AT1G06475.1	38.5	40
AT1G06500.1	51.64	53.14
AT1G06500.2	54.42	55.41
AT1G06500.3	69.55	69.55
AT1G06500.4	37.57	36.93
AT1G06510.1	59.89	59.27
AT1G06515.1	22.77	23.59
AT1G06515.2	48.8	48.57
AT1G06530.1	84.07	84.35
AT1G06550.1	32.55	32.94
AT1G06570.1	68.88	69.7
AT1G06570.2	42.57	42.83
AT1G06640.1	83.14	82.95
AT1G06640.2	55.65	55.65
AT1G06640.3	43.7	44.03
AT1G06645.1	54.37	55.42
AT1G06650.1	55.1	55.53
AT1G06650.2	48.29	48.06
AT1G06680.1	77.84	79.65
AT1G06680.2	57.7	58.77
AT1G06690.1	52.98	52.85
AT1G06700.1	39.76	40
AT1G06700.2	44.96	46.1
AT1G06720.1	55.7	55.51
AT1G06760.1	76.85	80.32
AT1G06790.1	22.37	22.9
AT1G06820.1	54.33	56.17
AT1G06830.1	64.05	62.82
AT1G06850.1	43.84	45.34
AT1G06850.2	43.31	44.84
AT1G06890.1	43.06	42.33
AT1G06890.2	60.98	60.75
AT1G06890.3	53.09	52.48
AT1G06900.1	50.13	50.44
AT1G06910.1	54.23	54.79
AT1G06950.1	33.08	33.14
AT1G06960.1	56	58.54
AT1G06960.2	62.05	64.38
AT1G06960.3	49.82	50.54
AT1G07000.1	34.37	35.04
AT1G07010.1	60.66	60.29
AT1G07010.2	59.88	59.15
AT1G07010.3	68.71	70.67
AT1G07020.1	67.74	66.52
AT1G07030.1	51.55	51.55
AT1G07040.1	43.43	43.18
AT1G07050.1	65.46	66.67
AT1G07070.1	77.22	75.96
AT1G07080.1	71.06	70.69
AT1G07110.1	42.18	42.62
AT1G07135.1	58.62	59.31
AT1G07140.1	69.46	69.91
AT1G07170.1	64.5	63.24
AT1G07170.2	62.43	62.43
AT1G07170.3	46.18	47.63
AT1G07200.1	36.25	35.28
AT1G07210.1	55.97	54.4
AT1G07220.1	34.67	33.75
AT1G07230.1	34.26	34.8
AT1G07250.1	74.28	73.39
AT1G07280.1	54.83	55.24
AT1G07280.2	52.77	52.93
AT1G07280.3	32.73	32.15
AT1G07310.1	50	51.99
AT1G07320.1	64.93	66.24
AT1G07320.2	56.68	56.68
AT1G07320.3	29.43	29.7
AT1G07320.4	78.06	77.66
AT1G07350.1	33.05	33.26
AT1G07350.2	30.77	29.75
AT1G07360.1	68.34	70.38
AT1G07370.1	74.22	73.54
AT1G07400.1	90.37	90.04
AT1G07420.1	14.88	14.48
AT1G07420.2	40.92	40
AT1G07430.1	65.17	64.63
AT1G07440.1	80.84	83.33
AT1G07440.2	57.77	59.65
AT1G07470.1	39.24	39.57
AT1G07480.1	39.46	40.29
AT1G07480.2	42.97	43.23
AT1G07510.1	50.73	50.68
AT1G07530.1	36.44	36.21
AT1G07590.1	53.82	53.48
AT1G07600.1	100	100
AT1G07610.1	55.56	57.14
AT1G07615.1	48.95	47.76
AT1G07630.1	45.69	47.23
AT1G07640.1	52.6	52.83
AT1G07640.2	60.75	62.18
AT1G07640.3	65.58	65.71
AT1G07650.1	45.31	44.86
AT1G07650.2	47.23	47.87
AT1G07660.1	56.36	57.83
AT1G07660.2	53.7	54.46
AT1G07670.1	34.78	34.63
AT1G07700.1	20.98	20.39
AT1G07700.2	42.02	42.79
AT1G07700.3	48.57	48.87
AT1G07720.1	53.54	53.45
AT1G07770.1	52	53.42
AT1G07770.2	56.82	57.08
AT1G07780.1	18.25	18.2
AT1G07780.2	21.46	21.89
AT1G07780.3	22.97	23.71
AT1G07780.4	55.95	55.62
AT1G07780.5	47.58	47.47
AT1G07790.1	34.29	34.12
AT1G07810.1	42.67	42.46
AT1G07820.1	64.44	65.25
AT1G07820.2	47.98	48.47
AT1G07830.1	36.46	34.12
AT1G07840.1	71.08	70.39
AT1G07840.2	55.73	54.99
AT1G07840.3	66.97	67.12
AT1G07890.1	53.02	53.15
AT1G07890.2	54.75	54.89
AT1G07890.3	54.55	54.38
AT1G07890.4	68.96	69.49
AT1G07890.5	42.11	41.99
AT1G07890.6	70.93	70.77
AT1G07890.7	76.54	76.97
AT1G07890.8	63.7	63.31
AT1G07920.1	50.76	51.91
AT1G07930.1	44.01	44.24
AT1G07930.2	88.43	88.09
AT1G07940.1	38.75	38.93
AT1G07940.2	55.39	54.72
AT1G07950.1	96.14	94.68
AT1G07960.1	77.5	77.22
AT1G07960.2	67.96	67.8
AT1G07960.3	70.97	70.46
AT1G07980.1	94.79	94.48
AT1G07990.1	45.63	45.53
AT1G08000.1	56.42	56.68
AT1G08000.2	52.76	52.41
AT1G08010.1	20.66	21.27
AT1G08010.2	78.93	79.46
AT1G08030.1	47.38	47.87
AT1G08040.1	37.76	38.62
AT1G08040.2	43.95	43.69
AT1G08110.1	23.51	22.9
AT1G08110.2	29.65	29.33
AT1G08110.3	45.55	45.05
AT1G08110.4	51.93	50.29
AT1G08115.1	100	100
AT1G08125.1	46.37	48.05
AT1G08125.2	44.66	44.66
AT1G08125.3	50.27	51.1
AT1G08130.1	49.94	49.83
AT1G08160.1	69.12	67.87
AT1G08180.1	63.74	65.48
AT1G08190.1	48.95	48.33
AT1G08200.1	35.65	35.5
AT1G08230.2	59.96	60.5
AT1G08315.1	49.5	51.98
AT1G08360.1	57.81	55.06
AT1G08370.1	69.18	67.97
AT1G08380.1	9.3	9.17
AT1G08410.1	36.4	36.03
AT1G08420.1	38.8	38.47
AT1G08420.2	41.35	41.9
AT1G08450.1	55.94	55.22
AT1G08450.2	43.97	44.08
AT1G08450.3	47.16	47.06
AT1G08460.1	56.03	56.03
AT1G08465.1	88.1	89.04
AT1G08470.1	87.73	87.73
AT1G08480.1	28.51	28.06
AT1G08490.1	42.83	42.91
AT1G08510.1	50.3	51.44
AT1G08520.1	42.36	42.95
AT1G08530.1	16.11	17.45
AT1G08540.1	53.12	53.38
AT1G08550.1	39.35	38.93
AT1G08550.2	31.72	30.65
AT1G08560.1	69.19	70.08
AT1G08570.1	49.79	49.28
AT1G08570.2	53.41	51.54
AT1G08570.3	24.44	23.85
AT1G08570.4	37	36.64
AT1G08580.1	82.91	84.62
AT1G08600.1	41.95	42.78
AT1G08600.2	39.23	39.88
AT1G08600.3	52.05	52.7
AT1G08600.4	42.48	43.19
AT1G08610.1	52.02	52.17
AT1G08620.1	53.28	52.97
AT1G08620.2	78.4	78.63
AT1G08640.1	70.22	69.05
AT1G08650.1	92.65	92.87
AT1G08650.2	91.33	91.35
AT1G08660.1	62.45	61.63
AT1G08660.2	44.53	43.42
AT1G08680.1	63.59	64.33
AT1G08680.2	65.53	66.21
AT1G08680.3	45.91	45.36
AT1G08680.4	48.25	48.39
AT1G08700.1	38.42	39.1
AT1G08710.1	46.09	43.65
AT1G08710.2	56.84	56.67
AT1G08720.1	30.2	30.08
AT1G08760.1	69.38	68.72
AT1G08780.1	29.61	28.34
AT1G08800.1	50.34	50.53
AT1G08800.2	56.15	55.28
AT1G08810.1	37.24	36.6
AT1G08810.2	38.28	40.85
AT1G08820.1	71.9	71.12
AT1G08820.2	43.31	44
AT1G08830.1	36.82	38.49
AT1G08830.2	83.52	83.85
AT1G08845.1	69.38	69.11
AT1G08845.2	37.99	36.55
AT1G08880.1	29.61	29.49
AT1G08890.1	36.98	36.98
AT1G08910.1	47.75	47.09
AT1G08930.1	21.49	21.98
AT1G08930.2	55.41	55.2
AT1G08940.1	28.72	28.14
AT1G08970.1	35.06	34.39
AT1G08970.2	53.91	54.5
AT1G08970.3	65.95	66.3
AT1G08970.4	66.86	66.48
AT1G08980.1	43.34	44.95
AT1G09010.1	45.81	45.68
AT1G09020.1	67.8	67.53
AT1G09060.1	60.55	59.67
AT1G09060.2	51.89	51.63
AT1G09060.3	50.25	49.9
AT1G09070.1	56	55.04
AT1G09100.1	69.61	68.58
AT1G09130.1	68.63	68.63
AT1G09130.2	44.32	45.61
AT1G09130.3	61.77	62.09
AT1G09140.1	54.16	54.55
AT1G09140.2	60.23	59.89
AT1G09150.1	60.06	58.33
AT1G09160.1	56.43	55.81
AT1G09160.2	54.77	54.41
AT1G09190.1	61.64	61.99
AT1G09200.1	27.17	26.74
AT1G09210.1	59.49	59.57
AT1G09250.1	35.03	33.54
AT1G09270.1	58.09	58.01
AT1G09270.2	47.49	47.13
AT1G09270.3	46.02	46.5
AT1G09290.1	45.68	46.95
AT1G09300.2	56.53	55.65
AT1G09310.1	78.69	77.11
AT1G09320.1	17.46	17.26
AT1G09330.1	70.5	69.63
AT1G09340.1	80.91	80.26
AT1G09415.1	90.67	91.62
AT1G09430.1	58.33	60.82
AT1G09440.1	42.67	42.64
AT1G09470.1	42.19	42.63
AT1G09470.2	51.88	52.58
AT1G09490.1	44.33	46.15
AT1G09490.2	60.31	61.26
AT1G09560.1	60.95	66.27
AT1G09570.1	35.14	35.42
AT1G09570.2	40.94	41.3
AT1G09575.1	42.48	42.48
AT1G09580.1	61.2	61.82
AT1G09590.1	79.02	76.62
AT1G09620.1	32.8	32.51
AT1G09630.1	80.34	77.96
AT1G09640.1	35.33	36.55
AT1G09640.2	53.56	54.97
AT1G09645.1	65.85	65.59
AT1G09660.1	39.86	39.16
AT1G09660.2	66.81	67.24
AT1G09690.1	86.25	82.8
AT1G09700.1	50.74	52.18
AT1G09730.1	40.38	40.75
AT1G09730.2	37.91	37.91
AT1G09740.1	65.33	64.62
AT1G09750.1	34.13	35.57
AT1G09760.1	53.89	55.32
AT1G09770.1	50.44	51.41
AT1G09780.1	68.47	67.61
AT1G09794.1	62.6	61.65
AT1G09795.1	63.67	64.46
AT1G09815.1	35.89	37.81
AT1G09830.1	40.34	39.8
AT1G09840.1	68.7	68.47
AT1G09840.2	83.59	83.74
AT1G09840.3	82.87	84.82
AT1G09840.4	72.34	71.36
AT1G09840.5	23.71	23.29
AT1G09840.6	20.95	20.85
AT1G09850.1	41.83	41.12
AT1G09870.1	64.53	65.16
AT1G09900.1	22.3	23.05
AT1G09920.1	35.62	36.89
AT1G09940.1	73.16	74.56
AT1G09970.1	58.71	58.76
AT1G09970.2	49.01	47.33
AT1G10020.1	50.31	48.93
AT1G10060.1	34.28	35.01
AT1G10060.2	33.21	34.1
AT1G10090.1	61.97	62.82
AT1G10120.1	80.39	79.2
AT1G10150.1	60.36	59
AT1G10170.1	35.49	35.08
AT1G10200.1	43.13	43.69
AT1G10230.1	65.71	61.45
AT1G10270.1	43.23	43.46
AT1G10290.1	42.84	42.31
AT1G10310.1	23.02	21.99
AT1G10320.1	45.54	45.26
AT1G10350.1	35.89	35.65
AT1G10360.1	33.45	34.63
AT1G10390.1	45.81	45.01
AT1G10390.2	41.71	40.83
AT1G10410.1	37.77	37.83
AT1G10430.1	50.65	51.66
AT1G10450.1	36.07	36.36
AT1G10470.1	54.72	53.81
AT1G10500.1	29.56	30.57
AT1G10510.1	31.4	30.88
AT1G10522.1	35.02	36.39
AT1G10522.2	77.38	77.63
AT1G10550.1	81.02	79.89
AT1G10570.1	48.84	48.6
AT1G10570.2	46.78	46.47
AT1G10580.1	37.98	37.78
AT1G10590.1	69.01	71.53
AT1G10590.2	62.09	63.7
AT1G10590.3	81.85	82.44
AT1G10600.1	73.19	72.97
AT1G10600.2	64.76	62.2
AT1G10600.3	33.23	32.54
AT1G10610.1	32.12	31.8
AT1G10630.1	24.53	24.15
AT1G10650.1	41.94	41.01
AT1G10650.2	46.2	44.51
AT1G10660.1	73.35	74.02
AT1G10660.2	65.5	66.67
AT1G10660.3	58.22	58.93
AT1G10660.4	66.79	67.49
AT1G10670.1	45.79	44.34
AT1G10670.2	36.9	36.56
AT1G10670.3	64.99	64.41
AT1G10670.4	32.07	32.07
AT1G10682.1	63.82	63.4
AT1G10700.1	44.47	44.2
AT1G10720.1	67.54	67.16
AT1G10730.1	31.24	31.75
AT1G10740.4	61.68	61.21
AT1G10760.1	45.56	46.02
AT1G10820.2	51.42	49.71
AT1G10830.1	73.6	73.94
AT1G10830.2	50.85	50.37
AT1G10840.1	34.21	34.49
AT1G10840.2	42.34	43.3
AT1G10850.1	59.14	59.47
AT1G10865.1	32.3	32.1
AT1G10865.2	25.7	26.29
AT1G10870.1	68.43	68.96
AT1G10890.1	23.48	23.42
AT1G10900.1	35.33	35.37
AT1G10910.1	41.84	41.9
AT1G10930.1	39.05	39.24
AT1G10940.1	60.17	61.46
AT1G10940.2	63.29	64.85
AT1G10950.1	36.56	36.61
AT1G10960.1	63.68	65.64
AT1G11020.1	51.18	49.48
AT1G11170.1	46.29	47.1
AT1G11210.1	69.11	67.52
AT1G11220.1	58.95	58.47
AT1G11240.1	96.17	94.72
AT1G11260.1	51.99	53.08
AT1G11280.1	60.11	60.18
AT1G11280.2	36.13	35.86
AT1G11280.3	34.91	34.73
AT1G11280.4	59.19	59.39
AT1G11310.1	34.27	34.68
AT1G11310.2	36.69	37.23
AT1G11330.1	54.89	55.64
AT1G11330.2	55.52	55.92
AT1G11350.1	31.24	31.66
AT1G11360.1	63.68	64.75
AT1G11360.2	63.25	64.16
AT1G11360.3	52.89	52.89
AT1G11360.4	63.21	61.89
AT1G11380.1	27.4	27.56
AT1G11400.1	69.04	71.47
AT1G11400.2	67.76	69.85
AT1G11400.3	61.95	62.37
AT1G11430.1	64.11	64.79
AT1G11440.1	59.95	60.55
AT1G11475.1	63.91	63.53
AT1G11480.1	49.56	50
AT1G11480.2	54.94	54.7
AT1G11520.1	37.78	37.78
AT1G11530.1	83.01	85.07
AT1G11580.1	32.72	32.72
AT1G11592.1	27.24	25.99
AT1G11630.1	60.31	61.26
AT1G11650.1	38.22	37.15
AT1G11650.2	26.01	25.96
AT1G11660.1	27.25	26.93
AT1G11680.1	50.17	51.28
AT1G11700.1	79.78	78.62
AT1G11720.1	47.44	46.91
AT1G11720.2	49.16	48.01
AT1G11750.1	41.71	41.77
AT1G11750.2	37.73	38.12
AT1G11755.1	60.88	62.11
AT1G11790.1	75	76.57
AT1G11820.1	52.73	54.04
AT1G11820.2	58.93	60
AT1G11840.1	34.3	35.06
AT1G11840.2	36.79	37.01
AT1G11840.3	87.65	89.6
AT1G11840.4	77.01	78.5
AT1G11840.5	47.83	47.05
AT1G11840.6	83.96	84.49
AT1G11850.1	50.52	50.52
AT1G11850.2	38.18	37.67
AT1G11850.3	44.65	43.9
AT1G11850.4	38.07	36.89
AT1G11860.1	55.17	55.29
AT1G11860.2	88.69	88.49
AT1G11860.3	57.92	59.55
AT1G11870.1	18.53	18.63
AT1G11870.2	18.04	18
AT1G11870.3	23.63	23.04
AT1G11890.1	67.65	66.86
AT1G11905.1	43.2	44.75
AT1G11910.1	52.21	52.78
AT1G11930.1	64.15	65.62
AT1G11930.2	70.56	69.97
AT1G11960.1	64.69	64.17
AT1G12000.1	43.57	44.02
AT1G12020.1	79.73	80.56
AT1G12050.1	34.82	34.69
AT1G12060.1	78.53	76.92
AT1G12080.1	30.81	33.14
AT1G12080.2	34.63	39.6
AT1G12090.1	62.69	65.76
AT1G12120.1	41.53	40.93
AT1G12140.1	55.94	55.69
AT1G12140.2	23.05	23.37
AT1G12230.1	55.49	58.53
AT1G12230.2	43.3	43.3
AT1G12240.1	35.29	34.47
AT1G12244.1	46.27	45.85
AT1G12250.1	37.76	37.87
AT1G12250.2	23.26	22.58
AT1G12270.1	28.91	29.3
AT1G12310.1	75.09	71.57
AT1G12320.1	32.18	31.94
AT1G12330.1	43.27	44.22
AT1G12360.1	20.38	20.05
AT1G12410.1	72.67	72.89
AT1G12420.1	62.62	61.4
AT1G12430.1	49.33	48.62
AT1G12430.2	49.28	48.35
AT1G12440.1	39.88	41.27
AT1G12440.2	87.39	88.76
AT1G12470.1	50.09	50.14
AT1G12500.1	54.12	54.45
AT1G12520.1	70.56	69.78
AT1G12520.2	58.59	58.14
AT1G12520.3	79.75	79.75
AT1G12530.1	55	55.28
AT1G12580.1	46.33	46.48
AT1G12650.1	29.49	29.41
AT1G12650.2	44.72	44.47
AT1G12650.3	49.04	50.14
AT1G12650.4	65.03	64.84
AT1G12680.1	38.04	39.33
AT1G12750.1	68.1	68.85
AT1G12750.2	69.96	71.16
AT1G12750.3	57.41	59.5
AT1G12760.1	60.14	59.42
AT1G12760.2	58.85	58.85
AT1G12770.1	75.37	74.7
AT1G12780.1	68.16	69.58
AT1G12800.1	35.78	36.36
AT1G12810.1	86.42	88.24
AT1G12810.2	47.65	48.71
AT1G12820.1	35.48	35.44
AT1G12830.1	65.96	67.87
AT1G12840.1	41.51	39.96
AT1G12850.1	81.29	80.15
AT1G12860.1	59.97	62.1
AT1G12880.1	49.7	50.15
AT1G12900.1	62.01	62.66
AT1G12900.2	54.72	54.83
AT1G12900.3	53.45	54.42
AT1G12900.4	36.49	36.49
AT1G12910.1	66.17	65.33
AT1G12920.1	77.6	77.92
AT1G12930.1	28.6	28.86
AT1G12970.1	42.31	42.28
AT1G13000.1	55.52	55.16
AT1G13000.2	67.68	68.86
AT1G13020.1	70.14	71.11
AT1G13030.1	37.02	37.45
AT1G13060.1	30.34	29.19
AT1G13060.2	11.11	11.3
AT1G13090.1	40.63	40.04
AT1G13110.1	32.53	31.83
AT1G13120.1	39.73	38.74
AT1G13160.1	66.75	66.04
AT1G13170.1	32.6	32.67
AT1G13170.2	20.69	20.93
AT1G13190.1	52.28	52.35
AT1G13210.1	50.04	50.46
AT1G13220.1	56.76	56.22
AT1G13220.2	41.49	41.06
AT1G13245.1	37.63	38.22
AT1G13250.1	9.87	10.31
AT1G13260.1	70.97	69.57
AT1G13270.1	42.42	42.52
AT1G13270.2	50.11	48.18
AT1G13280.1	35.58	35.58
AT1G13320.1	72.7	73.65
AT1G13320.2	86.68	87.05
AT1G13320.3	46.52	47.24
AT1G13350.1	25	24.61
AT1G13350.2	19.82	19.58
AT1G13360.1	59.68	58.18
AT1G13360.2	40.4	42.26
AT1G13360.3	34.31	36.12
AT1G13380.1	18.8	18.57
AT1G13390.1	58.6	57.6
AT1G13390.2	48.82	48.95
AT1G13440.1	55.6	54.34
AT1G13440.2	78.48	76.75
AT1G13450.1	57.68	56.36
AT1G13450.2	43.91	44.25
AT1G13450.3	64.29	63.65
AT1G13460.1	55.21	54.07
AT1G13460.2	50.47	49.69
AT1G13470.1	39.9	40.19
AT1G13560.1	55.78	57.43
AT1G13560.2	60.4	61.75
AT1G13640.1	60	59.36
AT1G13690.1	41.03	40.88
AT1G13730.1	42.56	44.23
AT1G13740.1	72.44	72.44
AT1G13790.1	69	68.33
AT1G13810.1	61.82	61.52
AT1G13820.1	71.67	70.82
AT1G13870.1	57.75	57.75
AT1G13880.1	68.61	69.12
AT1G13900.1	46.98	46.23
AT1G13920.1	48.87	48.71
AT1G13930.1	88.07	89.72
AT1G13930.2	51.97	51.07
AT1G13930.3	74.8	74.8
AT1G13950.1	45	46.75
AT1G13960.1	56.61	56.61
AT1G13960.2	40.54	41.34
AT1G13980.1	41.78	41.17
AT1G13980.2	47.4	47.13
AT1G13990.1	49.41	51.06
AT1G13990.2	80.57	78.06
AT1G13990.3	72.46	70.68
AT1G14000.1	47.57	48.24
AT1G14010.1	59.32	62.28
AT1G14030.1	76.46	77.01
AT1G14060.1	62.84	61.11
AT1G14140.1	80.99	79.95
AT1G14150.1	70.42	71.43
AT1G14150.2	41.24	41.24
AT1G14170.1	57.12	57.32
AT1G14170.2	55.57	56.03
AT1G14170.3	42.74	43.59
AT1G14200.1	24.91	23.93
AT1G14250.1	60.51	58.43
AT1G14270.1	59.07	60.09
AT1G14270.2	72.87	73.27
AT1G14270.3	64.32	64.48
AT1G14270.4	72.1	73.16
AT1G14280.1	24.43	25.05
AT1G14300.1	49.79	49.46
AT1G14300.2	36.33	35.42
AT1G14310.1	29.41	29.51
AT1G14320.1	81.09	79.06
AT1G14320.2	41.43	39.54
AT1G14330.1	39.13	38.81
AT1G14345.1	81.89	83.87
AT1G14350.1	61.25	61.35
AT1G14350.2	28.66	29.65
AT1G14360.1	42.16	42.13
AT1G14380.1	41.2	41.36
AT1G14380.2	53.75	53.68
AT1G14380.3	41.36	41.74
AT1G14400.1	40.84	42.33
AT1G14400.2	91.57	94.47
AT1G14410.1	50	50.14
AT1G14440.1	35.92	34.99
AT1G14440.2	54.76	56.37
AT1G14450.1	60.23	61.99
AT1G14460.1	43.15	42.39
AT1G14510.1	44.63	45.69
AT1G14570.1	64.82	67.27
AT1G14570.2	77.85	80.28
AT1G14570.3	70.42	72.66
AT1G14570.4	62.48	63.19
AT1G14580.1	46.77	46.55
AT1G14580.2	66.49	65.31
AT1G14610.1	56.49	56.78
AT1G14620.1	30.72	31.11
AT1G14620.2	30.91	31.21
AT1G14640.1	53.05	53.05
AT1G14650.1	56.64	56.84
AT1G14650.2	39.3	39.34
AT1G14670.1	68.75	69.16
AT1G14680.1	21.25	21.64
AT1G14685.1	24.72	24.01
AT1G14685.2	38.25	38.09
AT1G14685.3	44.18	43.16
AT1G14687.1	76.8	77.42
AT1G14690.1	40.7	41.53
AT1G14690.2	39.75	39.48
AT1G14700.1	75.76	75.57
AT1G14700.2	77.89	76.71
AT1G14710.1	42.15	42.99
AT1G14710.2	34.95	35.39
AT1G14720.1	74.71	75.59
AT1G14740.1	36.91	37.14
AT1G14810.1	67.17	67.03
AT1G14820.1	74.18	73.71
AT1G14820.3	78.96	78.25
AT1G14830.1	41.3	41.46
AT1G14840.1	45.34	46.31
AT1G14840.2	75.43	75.83
AT1G14880.1	50.78	50.58
AT1G14890.1	52.56	51.9
AT1G14900.1	49.05	47.99
AT1G14910.1	35.97	36.11
AT1G14980.1	93.98	95.75
AT1G14990.1	58.96	57.6
AT1G14990.2	57.14	54.09
AT1G15000.1	86.19	84.46
AT1G15020.1	51.79	51.78
AT1G15020.2	42.31	41.46
AT1G15030.1	51.13	50.18
AT1G15060.1	38.89	39.25
AT1G15120.1	18.85	18.46
AT1G15120.2	65.6	68.62
AT1G15125.1	19.48	20.07
AT1G15130.1	27.81	28.15
AT1G15140.1	34.57	34.57
AT1G15140.2	61.16	62.7
AT1G15140.3	68.81	70.05
AT1G15180.1	45.33	45.25
AT1G15180.2	60.68	60.58
AT1G15200.1	92.23	93.76
AT1G15200.2	92.35	93.87
AT1G15200.3	73.62	75.28
AT1G15200.4	54.44	55.92
AT1G15230.1	63.48	65.57
AT1G15240.2	29.48	30.24
AT1G15250.1	7.74	7.18
AT1G15260.1	49.17	50.64
AT1G15270.1	75.19	70.42
AT1G15280.1	53.04	51.96
AT1G15280.2	46.88	46.57
AT1G15310.1	61.57	61.23
AT1G15340.1	94.91	95.12
AT1G15340.2	61	61.77
AT1G15350.1	58.98	61.37
AT1G15350.2	93.61	94.82
AT1G15350.3	47.8	46.82
AT1G15370.1	40.83	41.18
AT1G15390.1	56.93	57.27
AT1G15400.1	42.45	42.06
AT1G15400.2	39.25	40.19
AT1G15400.3	82.19	82.95
AT1G15405.1	71.84	71.84
AT1G15420.1	30.29	30.46
AT1G15470.1	64.67	64.1
AT1G15480.1	52.88	53.6
AT1G15500.1	34.68	34.92
AT1G15510.1	56.7	56.77
AT1G15530.1	68.62	68.93
AT1G15660.1	30.73	31.11
AT1G15690.1	43.99	45.14
AT1G15690.2	63.75	65.93
AT1G15710.1	56.32	57
AT1G15730.1	71.46	72.03
AT1G15740.1	44.13	43.32
AT1G15750.1	55.17	54.62
AT1G15750.2	43.63	42.91
AT1G15750.3	42.37	41.84
AT1G15750.4	54.93	54.37
AT1G15780.1	46.23	45.56
AT1G15790.1	86.07	84
AT1G15790.2	25.45	24.74
AT1G15810.1	54.55	54.22
AT1G15820.1	47.26	47.51
AT1G15830.1	42.79	42.27
AT1G15860.1	70.55	68.66
AT1G15860.2	75.66	75
AT1G15860.3	80.06	78.24
AT1G15880.1	48.08	48.08
AT1G15885.1	86.05	88.62
AT1G15910.1	43.5	43.28
AT1G15930.1	81.82	80.62
AT1G15930.2	82.31	84.25
AT1G15940.1	52.18	51.5
AT1G15950.1	77.35	77.18
AT1G15950.2	43.63	42.05
AT1G15970.1	69.88	70.63
AT1G15980.1	52.52	53.37
AT1G16000.1	97.63	94.83
AT1G16010.1	69.59	70.07
AT1G16010.2	47.85	48.78
AT1G16010.3	62.71	63.25
AT1G16040.1	18.88	19.85
AT1G16080.1	86.12	86.54
AT1G16170.1	79.41	75.7
AT1G16180.1	58.27	59.72
AT1G16180.2	54.74	55.04
AT1G16190.1	89.09	90.09
AT1G16210.1	49.83	50.17
AT1G16240.1	94.08	93.56
AT1G16240.2	76.81	76.15
AT1G16240.3	94.07	93.54
AT1G16260.1	51.01	49.48
AT1G16260.2	51.99	50.67
AT1G16270.1	41.71	41.06
AT1G16270.2	52.1	51.25
AT1G16320.1	58.29	57.95
AT1G16350.1	52.9	51.74
AT1G16410.1	49.43	48.95
AT1G16410.2	63.56	63.13
AT1G16430.1	39.78	39.56
AT1G16460.1	46.17	45.51
AT1G16460.2	33.69	34.06
AT1G16460.3	23.93	24.48
AT1G16460.4	53	52.48
AT1G16470.1	63.29	66.77
AT1G16470.2	37.86	37.66
AT1G16500.1	18.18	18.29
AT1G16520.1	82.52	82.32
AT1G16560.1	21.09	21.32
AT1G16560.2	36.35	37.55
AT1G16560.3	28.99	29.17
AT1G16560.4	21.17	21.41
AT1G16610.1	60.49	62.42
AT1G16610.2	53.43	54.73
AT1G16610.3	52.71	53.17
AT1G16630.1	35.28	34.8
AT1G16670.1	31.59	31.48
AT1G16680.1	58.66	60.14
AT1G16700.1	72.53	74.23
AT1G16720.1	40.44	41.16
AT1G16740.1	58.76	58.1
AT1G16790.1	40	41
AT1G16810.1	61.43	64.32
AT1G16810.2	58.99	58.99
AT1G16840.1	35.43	35.29
AT1G16840.2	45.15	44.81
AT1G16840.3	36.76	36.47
AT1G16840.4	58.31	58.9
AT1G16850.1	60.85	60.59
AT1G16858.1	57.05	57.42
AT1G16860.1	57.05	57.42
AT1G16870.1	57.14	58.78
AT1G16880.1	66.41	66.93
AT1G16880.2	60.4	59.42
AT1G16890.1	74.18	72.69
AT1G16890.2	86.14	83.94
AT1G16890.3	91.64	91.64
AT1G16916.1	88.46	88.46
AT1G16920.1	57.8	57.6
AT1G16960.1	20.18	19.91
AT1G17050.1	52.44	53.14
AT1G17070.1	40.45	41.05
AT1G17080.1	41.15	40.79
AT1G17100.1	70	69.5
AT1G17110.1	39.36	39.58
AT1G17110.2	39.14	39.43
AT1G17130.1	54.14	53.2
AT1G17130.2	54.85	54.33
AT1G17140.1	79.75	80.58
AT1G17140.2	68.07	69.44
AT1G17145.1	50.44	49.89
AT1G17160.1	58.13	55.61
AT1G17160.2	67.4	64.72
AT1G17210.1	34.94	34.84
AT1G17220.1	80.58	80.31
AT1G17280.1	93.31	91.78
AT1G17280.2	52.41	51.79
AT1G17290.1	45.28	45.35
AT1G17330.1	39.1	38.31
AT1G17340.1	47.76	46.88
AT1G17360.1	36.21	35.75
AT1G17370.1	70.82	72.36
AT1G17370.2	61.33	62.87
AT1G17380.1	34.29	34.2
AT1G17420.1	42.95	44.36
AT1G17430.1	38.04	37.94
AT1G17440.1	73.07	74.96
AT1G17440.2	73.05	73.38
AT1G17455.1	91.49	91.81
AT1G17455.2	92.47	92.81
AT1G17470.1	56.35	56.12
AT1G17470.2	47.45	46.85
AT1G17490.1	100	100
AT1G17500.1	56.42	56.08
AT1G17510.1	57.62	58.17
AT1G17520.1	36.22	36.14
AT1G17530.1	75.26	75.26
AT1G17550.1	42.18	42.34
AT1G17580.1	34.08	34.1
AT1G17620.1	45.89	47.85
AT1G17650.1	24.16	22.79
AT1G17665.1	48.78	49.05
AT1G17680.1	53.33	52.97
AT1G17680.2	44.41	43.94
AT1G17690.1	43.9	44.32
AT1G17720.1	54.74	54.48
AT1G17720.2	50.18	49.94
AT1G17730.1	65.83	66.55
AT1G17745.1	43.63	42.41
AT1G17745.2	44.39	42.88
AT1G17780.1	70.53	72.75
AT1G17780.2	43.61	45.48
AT1G17820.1	48.12	49.46
AT1G17840.1	38.83	39.34
AT1G17850.1	40.11	40.54
AT1G17850.2	31.87	31.72
AT1G17880.1	78.88	76.89
AT1G17890.1	53.98	54.93
AT1G17890.2	55.68	55.22
AT1G17890.3	56.28	56.53
AT1G17930.1	51.32	50.3
AT1G17970.1	63.3	64.23
AT1G17980.1	35.86	36.11
AT1G17980.2	37.49	37.36
AT1G17990.1	42.97	43.87
AT1G17990.2	59.33	60.14
AT1G18000.1	48.16	49.19
AT1G18010.1	65.78	65.78
AT1G18020.1	21.81	21.93
AT1G18030.1	74.1	76.25
AT1G18030.2	39.96	40.65
AT1G18060.1	89.91	89.31
AT1G18070.1	63.07	62.79
AT1G18070.2	48.39	48.45
AT1G18070.3	61.15	61.09
AT1G18080.1	64.46	64.76
AT1G18150.1	22.43	23.31
AT1G18150.2	38.23	38.4
AT1G18150.3	24.7	25.66
AT1G18160.1	42.12	42.48
AT1G18170.1	68.03	66.36
AT1G18190.1	52.92	52.54
AT1G18210.1	59.33	59.55
AT1G18210.2	52.83	52.34
AT1G18250.1	66.24	69.13
AT1G18250.2	79.17	79.64
AT1G18260.1	69.59	70.53
AT1G18265.1	62.61	65.97
AT1G18300.1	44.71	45.68
AT1G18370.1	52.65	53.14
AT1G18440.1	14.57	14.9
AT1G18450.1	74.62	73.93
AT1G18470.1	66.23	67.45
AT1G18470.2	59.15	60.67
AT1G18480.1	43.31	43.13
AT1G18485.1	62.75	61.98
AT1G18490.1	50.28	48.9
AT1G18500.1	56.5	57.98
AT1G18540.1	44.28	47.06
AT1G18580.1	29.34	29.12
AT1G18590.1	66.08	67.57
AT1G18620.1	37.01	36.63
AT1G18620.2	47.74	48.23
AT1G18630.1	92.97	92.97
AT1G18650.1	47.19	48.28
AT1G18660.1	63.48	63.48
AT1G18660.2	44.07	44.57
AT1G18660.3	55.84	56.29
AT1G18660.4	40.87	40.93
AT1G18670.1	46.41	46.98
AT1G18700.1	43.13	42.91
AT1G18700.2	55.97	55.97
AT1G18700.3	50.5	51.32
AT1G18700.4	42.69	42.3
AT1G18720.1	47.49	44.57
AT1G18730.1	44.5	43.87
AT1G18730.2	33.91	32.91
AT1G18730.3	51.2	50
AT1G18730.4	65.82	66.84
AT1G18740.1	67.92	68.33
AT1G18800.1	68.34	68.86
AT1G18810.1	46.7	46.8
AT1G18840.1	70.21	70.76
AT1G18840.2	61.3	62.27
AT1G18890.1	48.44	47.42
AT1G18950.1	57.26	57.18
AT1G19000.1	40.29	38.32
AT1G19000.2	55.46	55
AT1G19010.1	58.1	57.99
AT1G19010.2	67.78	69.03
AT1G19020.1	8.28	8.97
AT1G19050.1	33.84	33.58
AT1G19080.1	49.05	51.16
AT1G19080.2	33.06	34.29
AT1G19110.1	58.91	58.84
AT1G19120.1	65.56	61.72
AT1G19130.1	62.22	60.87
AT1G19150.1	83.33	83.85
AT1G19180.1	40.39	38.97
AT1G19180.2	34.33	34.41
AT1G19240.1	48.83	46.64
AT1G19300.1	74.28	74.78
AT1G19310.1	69.71	72.39
AT1G19350.1	62.73	62.01
AT1G19350.3	59.13	59.52
AT1G19350.4	34.65	34.96
AT1G19350.5	52.54	53.68
AT1G19350.6	46.75	46.4
AT1G19360.1	75.97	73.88
AT1G19370.1	58.45	58.37
AT1G19396.1	40.99	47.48
AT1G19396.3	49.69	55.86
AT1G19397.1	51.61	52.24
AT1G19400.1	49.28	50.46
AT1G19400.2	39.86	39.57
AT1G19430.1	35.4	36.1
AT1G19440.1	74.41	73.72
AT1G19485.1	77.29	78.65
AT1G19485.2	27.57	27.9
AT1G19520.1	83.06	82.93
AT1G19520.2	12.32	12.22
AT1G19530.1	28.83	27.71
AT1G19550.1	94.08	93.46
AT1G19570.1	42.5	42.5
AT1G19570.2	48.38	47.69
AT1G19580.1	65.85	66.29
AT1G19580.2	58.44	58.69
AT1G19600.1	70.66	70.91
AT1G19660.1	60.29	61.32
AT1G19660.2	58.69	58.93
AT1G19670.1	55.45	53.72
AT1G19680.1	60.9	62.39
AT1G19690.1	50.24	48.95
AT1G19700.1	46.97	47.11
AT1G19700.2	58.83	60.09
AT1G19700.3	42.5	43.52
AT1G19710.1	53.79	54.26
AT1G19715.1	68.83	69.52
AT1G19715.2	40.43	41.07
AT1G19715.3	75.74	77.42
AT1G19720.1	37.46	37.24
AT1G19730.1	39.24	41.33
AT1G19740.1	39.04	38.12
AT1G19770.1	58.56	59.3
AT1G19800.1	59.05	58.3
AT1G19800.2	56.03	55.02
AT1G19800.3	54.69	54.25
AT1G19835.1	32.16	32.1
AT1G19835.2	31.43	31.29
AT1G19870.1	65.94	65.01
AT1G19880.1	37.79	37.25
AT1G19910.1	67.78	66.79
AT1G19920.1	76.63	75.76
AT1G19950.1	52.4	53.17
AT1G19960.1	55.97	55.56
AT1G19990.1	26.44	27.27
AT1G20010.1	47.48	47.48
AT1G20015.1	100	89.29
AT1G20020.1	58.14	57.6
AT1G20020.2	31.14	30.99
AT1G20020.3	59.95	60.23
AT1G20050.1	54.64	54.79
AT1G20090.1	65.04	66.83
AT1G20100.1	37.24	37.06
AT1G20100.2	43.36	44.82
AT1G20110.1	57.91	57.47
AT1G20140.1	96.57	94.94
AT1G20190.1	51.85	50.42
AT1G20200.1	37	35.64
AT1G20220.1	70.32	69.68
AT1G20225.1	48.73	47.52
AT1G20260.1	49.84	50.5
AT1G20270.1	57.99	56.7
AT1G20300.1	57.1	56.01
AT1G20330.1	66.32	67.65
AT1G20340.1	73.65	73.9
AT1G20370.1	52.66	52.26
AT1G20410.1	34.05	35.23
AT1G20430.1	51.61	51.61
AT1G20440.1	72	72
AT1G20450.1	66.59	64.37
AT1G20450.2	85.16	84.58
AT1G20460.1	34.42	35.57
AT1G20510.1	59.97	60.07
AT1G20510.2	64.61	65.68
AT1G20560.1	49.93	49.85
AT1G20560.2	41.07	40.83
AT1G20575.1	51.39	50.46
AT1G20580.1	89.76	91.94
AT1G20610.1	29.91	29.5
AT1G20620.1	39.73	38.88
AT1G20620.2	38.35	38.47
AT1G20620.4	56.24	56.79
AT1G20620.5	46.25	47.25
AT1G20630.1	38.03	36.99
AT1G20670.1	41.22	40.93
AT1G20693.1	32.12	32.12
AT1G20693.2	27	26.91
AT1G20693.3	36.09	36.09
AT1G20696.1	73.43	72.16
AT1G20696.2	45.71	43.79
AT1G20696.3	86.36	86.97
AT1G20760.1	74.03	72.93
AT1G20770.1	86.38	86.38
AT1G20780.1	49.36	49.2
AT1G20810.1	72.82	72.09
AT1G20816.1	56.64	56.89
AT1G20830.1	59.8	61.34
AT1G20840.1	74.2	74.29
AT1G20850.1	50.12	48.8
AT1G20920.1	49.35	50.37
AT1G20920.2	53.75	54.83
AT1G20930.1	68.91	68.73
AT1G20950.1	49.28	49.57
AT1G20970.1	52.54	52.75
AT1G20980.1	43.18	42.68
AT1G21065.1	72.52	74.51
AT1G21080.1	43.36	42.92
AT1G21080.2	31.9	30.79
AT1G21080.3	63.42	64.51
AT1G21100.1	45.71	47.38
AT1G21110.1	44.57	45.25
AT1G21120.1	46.49	47.64
AT1G21130.1	42.76	44.89
AT1G21130.2	29.15	29.59
AT1G21160.1	38.84	38.37
AT1G21170.1	35.17	35.79
AT1G21190.1	64.09	66.2
AT1G21200.1	57.77	59.07
AT1G21210.1	59.86	60.36
AT1G21240.1	74.29	74.67
AT1G21245.1	99.38	99.38
AT1G21250.1	35.81	35.68
AT1G21260.1	82.64	83.68
AT1G21270.1	39.67	39.37
AT1G21310.1	35.81	38.01
AT1G21350.1	67.4	70.52
AT1G21350.2	48	47.06
AT1G21350.3	65.96	68.44
AT1G21370.1	54.96	54.65
AT1G21370.2	73.96	75.46
AT1G21380.1	27	26.78
AT1G21390.1	61.5	61.5
AT1G21400.1	64.06	63.66
AT1G21440.1	91.05	92.47
AT1G21450.1	42.5	44.11
AT1G21500.1	42.13	43.1
AT1G21560.1	39.71	40.38
AT1G21560.2	69.2	68.16
AT1G21560.3	63.22	62.21
AT1G21590.1	34.39	34.03
AT1G21600.1	60.92	61.06
AT1G21600.2	54.94	54.94
AT1G21610.1	51.26	51.45
AT1G21610.2	51.13	51.52
AT1G21610.3	58.22	58.22
AT1G21630.1	35.3	35.56
AT1G21630.2	51.95	52.36
AT1G21640.1	52.88	52.88
AT1G21640.2	37.3	36.81
AT1G21650.1	38.64	38.05
AT1G21650.2	52.15	51.76
AT1G21660.1	38.08	37.22
AT1G21670.1	39.16	39.75
AT1G21680.1	60.96	61.68
AT1G21690.1	32.86	33.73
AT1G21690.2	54	54.39
AT1G21690.3	37.59	38.27
AT1G21690.4	42.82	43.87
AT1G21700.1	49.53	49.36
AT1G21720.1	69.42	72.66
AT1G21750.1	42.81	42.03
AT1G21750.2	52.06	51.42
AT1G21760.1	62.82	61.52
AT1G21770.1	73.45	72.63
AT1G21780.1	43.98	43.62
AT1G21780.2	21.15	21.3
AT1G21790.1	68.29	68.8
AT1G21830.1	49.69	51.46
AT1G21880.1	44.81	44.25
AT1G21880.2	68.79	69.08
AT1G21900.1	55.71	54.96
AT1G21910.1	53.6	55.86
AT1G21920.1	78.53	78.4
AT1G21930.1	45.56	45.83
AT1G21980.1	49.95	49.29
AT1G22070.1	42.55	42.02
AT1G22140.1	48.57	45.95
AT1G22160.1	42.66	40.09
AT1G22190.1	66.73	67.42
AT1G22200.1	46.53	46.62
AT1G22200.2	47.38	47.83
AT1G22230.1	61.58	60.96
AT1G22250.1	55.98	55.56
AT1G22270.1	66.96	67.57
AT1G22280.1	44.42	46.48
AT1G22280.2	46.51	47.75
AT1G22280.3	67.16	67.16
AT1G22300.1	49.76	50.87
AT1G22300.2	55.73	56.59
AT1G22300.3	82.33	82.33
AT1G22310.1	79.34	78.47
AT1G22310.2	63.48	63.15
AT1G22330.1	86.41	86.65
AT1G22350.1	36.89	36.62
AT1G22360.1	41.19	41.26
AT1G22360.2	42.21	42.53
AT1G22370.1	74.33	74.33
AT1G22370.2	60.74	59.41
AT1G22400.1	57.04	56.16
AT1G22403.1	29.31	28.98
AT1G22410.1	53.25	53.08
AT1G22430.1	47.2	48.76
AT1G22430.2	55.03	56.42
AT1G22450.1	86.11	85.25
AT1G22520.1	90.54	91.78
AT1G22520.2	61.24	60.95
AT1G22530.1	46.09	45.74
AT1G22590.1	56.15	56.37
AT1G22590.2	89.91	88.36
AT1G22610.1	42.35	42
AT1G22620.1	59.26	58.23
AT1G22630.1	43.9	45
AT1G22690.1	40.11	41.52
AT1G22690.2	84.21	88.89
AT1G22690.3	42.86	41.1
AT1G22700.1	42.15	42.59
AT1G22700.2	48.67	49.06
AT1G22700.3	33.77	34.31
AT1G22710.1	46.14	47.88
AT1G22730.1	36.59	37.02
AT1G22740.1	42.9	42.35
AT1G22780.1	72.61	72.31
AT1G22790.1	82.66	82.04
AT1G22790.2	64.56	64.89
AT1G22800.1	60.91	59.32
AT1G22840.1	92.92	93.75
AT1G22840.2	32.6	32.03
AT1G22850.1	37.15	36.96
AT1G22882.1	48.84	49.38
AT1G22885.1	68.87	71.72
AT1G22885.2	69.9	71.29
AT1G22890.1	65.34	65.34
AT1G22910.1	49.46	51.35
AT1G22910.2	37.63	36.76
AT1G22910.3	73.18	74.56
AT1G22930.1	51.93	51.81
AT1G22930.2	61.19	60.68
AT1G22940.1	35.98	36.22
AT1G22950.1	21.75	21.62
AT1G22970.1	43.86	43.64
AT1G23020.1	67.94	68.04
AT1G23020.2	67.37	67.37
AT1G23030.1	68.8	69.68
AT1G23052.1	49.63	50.38
AT1G23080.1	37.6	37.92
AT1G23080.2	39.89	42.02
AT1G23080.3	29.9	30.41
AT1G23090.1	34.49	34.69
AT1G23130.1	82.26	87.93
AT1G23190.1	33.14	32.24
AT1G23205.1	49.44	48.19
AT1G23220.1	71.9	74.62
AT1G23260.1	75.19	77.29
AT1G23280.1	27.97	28.62
AT1G23290.1	54.12	53.85
AT1G23310.1	54.96	55.69
AT1G23310.2	72.5	72.29
AT1G23360.1	55.21	56
AT1G23360.2	40.09	41.76
AT1G23360.3	47.89	47.78
AT1G23390.1	37.7	39.07
AT1G23400.1	65.67	67.33
AT1G23410.1	11.64	11.46
AT1G23440.1	32.61	32.11
AT1G23490.1	85.32	83.04
AT1G23710.1	84	83.55
AT1G23740.1	31.32	29.93
AT1G23750.1	53.01	52.81
AT1G23820.1	68.94	70.18
AT1G23820.2	72.27	72.59
AT1G23860.1	20.55	20.46
AT1G23860.2	23.49	23.54
AT1G23860.3	25.4	26.13
AT1G23860.4	67.86	69.94
AT1G23870.1	44.6	44.47
AT1G23900.1	30.59	30.8
AT1G23900.2	37.29	37.86
AT1G23950.1	31.14	31.55
AT1G23950.2	31.41	31.41
AT1G23950.3	30.7	30.14
AT1G23950.4	58.12	57.97
AT1G23950.5	31.78	31.03
AT1G23960.1	53.75	51.87
AT1G23960.2	75.06	72.19
AT1G23970.1	49.64	50.36
AT1G23970.2	64.79	65.56
AT1G24020.1	43.91	42.26
AT1G24020.2	57.14	55.63
AT1G24040.1	41.01	41.36
AT1G24050.1	64.79	66.36
AT1G24100.1	69.49	68.21
AT1G24120.1	75.9	75.49
AT1G24147.1	42.71	41.87
AT1G24160.1	44.96	45.89
AT1G24160.2	28.59	28.9
AT1G24170.1	40.75	39.85
AT1G24180.1	65.63	64.75
AT1G24190.1	63.38	64.64
AT1G24190.2	63.07	64.5
AT1G24240.1	22.84	23.16
AT1G24267.1	48.99	50.38
AT1G24267.2	58.58	59.25
AT1G24300.1	41.6	42.42
AT1G24300.2	42.19	43.09
AT1G24310.1	69.58	67.95
AT1G24340.1	43.07	43.33
AT1G24350.1	64.91	63.4
AT1G24350.2	52.8	52.63
AT1G24360.1	61.43	59.96
AT1G24450.1	23.85	22.3
AT1G24490.1	53.79	53.08
AT1G24490.2	46.47	45.49
AT1G24510.1	78.04	78.65
AT1G24510.2	42.05	41.3
AT1G24560.1	73.73	73.73
AT1G24575.1	37.34	38.31
AT1G24610.1	47.96	49.18
AT1G24625.1	83.94	86.02
AT1G24764.1	41.34	41.78
AT1G24793.1	28.64	28.29
AT1G24793.2	59.13	59.9
AT1G24800.1	59.01	56.87
AT1G24807.1	93.42	95.52
AT1G24880.1	59.45	57.08
AT1G24880.2	83.33	85.16
AT1G24880.3	72.5	72.14
AT1G24881.1	59.09	56.95
AT1G24909.1	78.7	77.27
AT1G25054.1	44.35	45.32
AT1G25054.2	44.58	46.22
AT1G25055.1	25.26	24.12
AT1G25083.1	82.3	80.97
AT1G25098.1	64.65	66.51
AT1G25098.2	46.58	47.52
AT1G25145.1	53.98	52.93
AT1G25150.1	29.44	28.43
AT1G25155.1	78.7	77.27
AT1G25175.1	67.8	67.48
AT1G25210.1	48.68	51.16
AT1G25210.2	42.67	45.24
AT1G25211.1	58.33	57.65
AT1G25220.1	30.65	29.61
AT1G25220.2	83.94	83.6
AT1G25230.1	36.26	36.26
AT1G25250.1	43.54	43.91
AT1G25260.1	36.92	36.59
AT1G25275.1	29.53	31.43
AT1G25275.2	51.05	53.28
AT1G25275.3	71.6	72.5
AT1G25280.1	61.62	60.71
AT1G25280.2	36.82	36.6
AT1G25280.3	58.54	57.45
AT1G25350.1	41.77	41.55
AT1G25350.2	55.4	55.6
AT1G25370.1	42.24	42
AT1G25380.1	38.59	38.2
AT1G25390.1	78.5	78.79
AT1G25400.1	35.25	34.67
AT1G25400.2	56.67	57.35
AT1G25420.1	65.65	65.65
AT1G25420.2	43.72	44.42
AT1G25420.3	37.7	38.14
AT1G25440.1	44.76	44.42
AT1G25450.1	48.98	49.07
AT1G25490.1	52.77	52.77
AT1G25520.1	33.5	35.13
AT1G25540.1	32.18	31.92
AT1G25540.2	41.21	40.48
AT1G25550.1	49.16	49.4
AT1G25560.1	44.35	44.74
AT1G25570.1	21.89	22.47
AT1G25580.1	41.59	41.92
AT1G25682.1	31.28	31.28
AT1G25988.1	27.74	27.39
AT1G26090.1	39.37	39.15
AT1G26110.1	78.66	76.32
AT1G26110.2	43.83	43.77
AT1G26150.1	52.17	53.52
AT1G26160.1	52.19	51.9
AT1G26180.1	54.18	55.8
AT1G26208.1	32.06	31.64
AT1G26210.1	33.14	33.33
AT1G26220.1	14.29	14.41
AT1G26230.1	82.22	81.06
AT1G26230.2	34.38	34.7
AT1G26260.1	32.51	32.09
AT1G26260.2	59.59	59.92
AT1G26260.3	44.6	43.28
AT1G26270.1	44.16	44.1
AT1G26290.1	88.69	87.65
AT1G26300.1	47.23	46.96
AT1G26340.1	93.99	94.4
AT1G26440.1	52.76	50.96
AT1G26440.2	62.24	62.79
AT1G26440.3	64.83	62.9
AT1G26440.4	70.09	67.42
AT1G26450.1	48.9	47.85
AT1G26460.1	47.8	48.84
AT1G26470.1	100	99.56
AT1G26520.1	36.67	35.93
AT1G26550.1	73.59	74.24
AT1G26580.1	46.7	47.37
AT1G26620.1	34.7	34.34
AT1G26630.1	66.9	68.61
AT1G26630.2	46.39	47.54
AT1G26640.1	75.06	75.22
AT1G26660.1	50.83	50
AT1G26660.2	56.72	57.94
AT1G26665.1	54.01	53.11
AT1G26665.2	57.2	57.5
AT1G26670.1	38.57	37.4
AT1G26690.1	51.66	50
AT1G26740.1	44.27	45.31
AT1G26750.1	37.14	37.82
AT1G26760.1	33.33	34.29
AT1G26761.1	56.63	56.63
AT1G26770.1	41.37	41.65
AT1G26770.2	49.42	50
AT1G26800.1	65.84	66.92
AT1G26830.1	42.19	43.23
AT1G26850.1	43.99	43.49
AT1G26850.2	42.05	41.59
AT1G26850.3	37.41	36.28
AT1G26880.1	79.44	78.34
AT1G26880.2	76.47	79.27
AT1G26910.1	33.22	34.15
AT1G26920.1	30.94	30.22
AT1G26930.1	56.67	55.08
AT1G26940.1	40.45	41.39
AT1G27000.1	63.01	61.33
AT1G27020.1	21.85	22.38
AT1G27030.1	43.58	44.12
AT1G27050.1	45.42	45.59
AT1G27090.1	32.53	32.26
AT1G27100.1	61.01	63.38
AT1G27130.1	50.85	52.17
AT1G27150.1	45.01	47.25
AT1G27190.1	27.73	27.18
AT1G27210.1	55.09	55.03
AT1G27290.1	35.98	36.99
AT1G27290.2	34.69	35.81
AT1G27300.1	65.75	67.84
AT1G27310.1	77.6	77.91
AT1G27320.1	40.12	40.12
AT1G27330.1	76.03	78.17
AT1G27340.1	47.83	48.85
AT1G27350.1	32.89	31.41
AT1G27385.1	51.94	49.63
AT1G27385.2	36.12	35.32
AT1G27385.3	84.28	83.55
AT1G27385.4	66.41	65.89
AT1G27390.1	70.8	67.99
AT1G27400.1	53.23	51.28
AT1G27430.1	43.92	43.6
AT1G27435.1	66.51	65.32
AT1G27450.1	85.26	87.85
AT1G27450.2	83.17	84.56
AT1G27450.3	48.15	50.24
AT1G27460.1	42.2	43
AT1G27470.1	38.12	38.45
AT1G27480.1	61.21	60.84
AT1G27510.1	45.56	46.33
AT1G27520.1	41.09	40.28
AT1G27530.1	58.05	58.3
AT1G27540.1	25.1	24.67
AT1G27540.2	39.29	39.2
AT1G27565.1	73.03	77.08
AT1G27600.1	46.63	46.88
AT1G27600.2	42.29	41.73
AT1G27630.1	32.53	31.63
AT1G27650.1	34.27	35.35
AT1G27650.2	77.33	78.12
AT1G27680.1	45.79	46.69
AT1G27695.1	97.06	96.49
AT1G27695.2	60.53	59.74
AT1G27700.1	26.6	27.25
AT1G27730.1	60.15	56.34
AT1G27752.1	43.21	43.16
AT1G27752.2	43.43	43.3
AT1G27760.1	46.3	46.68
AT1G27760.2	49.28	50.37
AT1G27760.3	23.65	23.15
AT1G27770.1	37.74	37.77
AT1G27770.2	20.77	21.09
AT1G27840.1	68.31	67.73
AT1G27840.2	60.11	60.23
AT1G27840.3	65.57	65.34
AT1G27850.1	39.44	39.11
AT1G27930.1	72.36	73.61
AT1G27950.1	38.4	36.25
AT1G27970.1	27.96	27.31
AT1G27970.2	42.86	43.07
AT1G27980.1	55.09	54.65
AT1G28050.1	64.16	64.05
AT1G28060.1	32.22	32.85
AT1G28090.1	33.93	34.1
AT1G28090.2	48.84	48.92
AT1G28090.3	76.11	76.65
AT1G28120.1	32.15	32.15
AT1G28140.1	43.32	44.66
AT1G28150.1	75	77.78
AT1G28190.1	52	52.32
AT1G28200.1	45.38	46.15
AT1G28240.1	66.54	67.02
AT1G28280.1	76.67	76.27
AT1G28280.2	84.59	85.38
AT1G28290.1	60.46	61.72
AT1G28290.2	84.5	84.76
AT1G28320.1	33.08	33.17
AT1G28330.1	61.57	63.14
AT1G28330.2	32.98	34.43
AT1G28330.3	24.25	25
AT1G28330.4	45	44.26
AT1G28330.5	77.29	76.64
AT1G28340.1	34.45	34.35
AT1G28350.1	48.84	49.14
AT1G28370.1	65.86	65.96
AT1G28380.1	52.82	52.16
AT1G28390.1	52.29	52.85
AT1G28395.1	38.89	38.1
AT1G28395.2	13.5	13.57
AT1G28395.3	19.11	18.99
AT1G28395.4	29.24	29.36
AT1G28395.5	18.86	18.14
AT1G28400.1	43.32	42.36
AT1G28440.1	38.09	39.06
AT1G28480.1	100	100
AT1G28490.1	57.73	56.73
AT1G28490.2	40.24	41.36
AT1G28510.1	59.19	60.32
AT1G28520.1	56.28	56.26
AT1G28520.2	59.5	60.03
AT1G28540.1	82.97	81.18
AT1G28580.1	39.17	38.68
AT1G28580.2	49.82	49.65
AT1G28600.1	51.92	53.29
AT1G28600.2	81.53	82.19
AT1G28610.2	58.61	57.17
AT1G28620.1	36.28	35.13
AT1G28960.2	70.54	70.85
AT1G28960.3	76.73	77.78
AT1G28960.4	52.49	53.38
AT1G28960.5	77.29	77.68
AT1G29030.1	41.3	40.84
AT1G29040.1	30.65	31.24
AT1G29040.2	67.59	68.4
AT1G29040.3	56.27	56.49
AT1G29040.4	53.13	53.56
AT1G29060.1	73.62	72.48
AT1G29070.1	66.1	66.1
AT1G29150.1	32.57	33.79
AT1G29160.1	25	24.7
AT1G29220.1	39.39	38.84
AT1G29220.2	49.26	49.39
AT1G29250.1	57.81	56.15
AT1G29260.1	75.31	73.48
AT1G29310.1	60.4	59.61
AT1G29320.1	43.15	43.06
AT1G29340.1	63.96	62.37
AT1G29350.1	51.94	51.88
AT1G29370.1	59.75	59.27
AT1G29390.1	40.39	39.62
AT1G29390.2	62.43	62.25
AT1G29395.1	39.1	37.92
AT1G29400.1	59.45	60.11
AT1G29400.2	71.94	71.63
AT1G29418.1	73.91	76.12
AT1G29470.1	85.6	85.98
AT1G29470.2	60.36	60.66
AT1G29530.1	41.01	40.11
AT1G29550.1	45.13	45.13
AT1G29560.1	33.11	33.84
AT1G29560.2	56.46	56.37
AT1G29590.1	46.67	46.49
AT1G29660.1	50.62	48.57
AT1G29670.1	70.88	71.22
AT1G29700.1	66.51	65.45
AT1G29750.2	38.08	37.29
AT1G29790.1	22.96	23.14
AT1G29790.2	62.89	60.19
AT1G29810.1	47.92	47.92
AT1G29820.1	72.23	71.66
AT1G29820.2	66.61	66.41
AT1G29850.1	55.56	56.37
AT1G29850.2	51.71	52.31
AT1G29850.3	57.2	58.08
AT1G29880.1	37.09	37
AT1G29890.1	28.31	28.4
AT1G29890.2	63.61	64.42
AT1G29900.1	38.81	38.69
AT1G29910.1	84.43	88.96
AT1G29920.1	63.09	61.32
AT1G29930.1	70.06	67.28
AT1G29940.1	37.83	38.77
AT1G29950.1	51.04	52.27
AT1G29950.2	47.31	46.79
AT1G29951.1	46.85	46.39
AT1G29952.1	47.31	46.79
AT1G29965.1	29.75	29.75
AT1G29970.1	73.38	72.88
AT1G29970.2	46.91	46.01
AT1G29980.1	52.85	52.62
AT1G29990.1	68.04	66.82
AT1G30000.1	45.14	44.97
AT1G30070.1	64.03	63.4
AT1G30070.2	56.96	56.96
AT1G30090.1	53.89	55.6
AT1G30110.1	30.77	31.68
AT1G30110.2	61.96	62.41
AT1G30120.1	17.97	18.36
AT1G30130.1	30.7	30.84
AT1G30130.2	55.34	56.58
AT1G30200.1	37.48	37.68
AT1G30200.2	43.09	43.09
AT1G30210.1	69.47	70.63
AT1G30210.2	48.5	48.89
AT1G30230.1	66.04	61.99
AT1G30230.2	82.97	80
AT1G30250.1	93.94	91.18
AT1G30260.1	51.49	52.53
AT1G30270.1	36	36.15
AT1G30280.1	57.89	58.35
AT1G30320.1	49.82	49.19
AT1G30330.1	29.61	29.78
AT1G30330.2	32.87	33.44
AT1G30360.1	76.6	75.3
AT1G30380.1	60.67	62.77
AT1G30410.1	52.64	52.54
AT1G30440.1	38	37.95
AT1G30460.1	46.82	47.72
AT1G30470.1	51.96	51.79
AT1G30470.2	54.65	54.48
AT1G30470.3	52.7	53.57
AT1G30480.1	38.04	38.49
AT1G30490.1	32.34	32.81
AT1G30510.1	43.35	43.27
AT1G30510.2	39.59	39.51
AT1G30510.3	48.63	47.76
AT1G30530.1	68.53	68.76
AT1G30580.1	25.54	25.9
AT1G30610.1	39.77	41.13
AT1G30610.2	43.02	43.71
AT1G30630.1	44.99	45.22
AT1G30640.1	61.17	61.48
AT1G30680.1	65.95	66.59
AT1G30690.1	49.76	50.08
AT1G30690.2	54.97	55.87
AT1G30810.1	64.73	64.5
AT1G30810.2	36.64	36.32
AT1G30820.1	48.47	49.07
AT1G30835.1	19.4	19.29
AT1G30835.2	71.84	70.64
AT1G30880.1	61.29	59.9
AT1G30910.1	66.67	65.68
AT1G30960.1	50.63	50.42
AT1G30970.1	58.2	55.8
AT1G30970.2	61.88	58.46
AT1G31070.1	35.67	35.34
AT1G31070.2	42.23	41.25
AT1G31130.1	76.52	75.5
AT1G31150.1	61.76	61.26
AT1G31160.1	73.63	75
AT1G31170.1	85.33	83.51
AT1G31170.2	84.97	84
AT1G31170.3	39.55	37.84
AT1G31170.4	71.48	73.93
AT1G31180.1	63.13	63.72
AT1G31190.1	60.8	61.35
AT1G31230.1	50.96	51.79
AT1G31280.1	72.13	71.52
AT1G31310.1	72.15	71.7
AT1G31330.1	82.56	84.98
AT1G31340.1	59.33	56.11
AT1G31350.1	92.57	92.37
AT1G31360.1	41.84	42.01
AT1G31360.2	46.88	46.68
AT1G31410.1	51.37	50.36
AT1G31420.1	46.57	46.11
AT1G31420.2	39.39	39.29
AT1G31440.1	20.94	20.63
AT1G31540.2	35.73	36.88
AT1G31550.1	56.06	54.95
AT1G31580.1	59.55	59.22
AT1G31600.1	37.79	38.21
AT1G31600.2	25.67	25.47
AT1G31600.3	41.13	40.56
AT1G31650.1	25.37	25.65
AT1G31660.1	51.4	52.99
AT1G31690.1	69.17	68.62
AT1G31730.1	35.44	36.01
AT1G31780.1	30.63	30.85
AT1G31800.1	52.14	51.75
AT1G31810.1	54.83	54.3
AT1G31812.1	16.75	17.77
AT1G31817.1	32.71	32.28
AT1G31850.1	51.2	50.39
AT1G31850.2	40	39.73
AT1G31850.3	74.73	74.9
AT1G31860.1	62.11	63.19
AT1G31870.1	41.47	40.15
AT1G31870.2	57.95	57.23
AT1G31910.1	49.8	48.71
AT1G31910.2	65.88	65.39
AT1G31920.1	45.24	44.75
AT1G31930.1	53.42	54.28
AT1G31930.2	64.32	65.31
AT1G31930.3	45.04	45.86
AT1G31940.1	50.9	50.71
AT1G31970.1	43.4	42.81
AT1G32050.1	47.48	47.71
AT1G32060.1	51.91	53.26
AT1G32070.1	72.67	72.67
AT1G32070.2	62.12	63.08
AT1G32070.3	75	75
AT1G32080.1	44.97	44.58
AT1G32100.1	48.32	48.6
AT1G32130.1	43.8	43.35
AT1G32130.2	68.58	69.55
[truncated: 13,710 more rows]

## Sheet: F2
F2 Shoot Control vs. Shoot Salt PPV, 5’ UTR
transcript	sensitivity	PPV
AT1G01020.1	52.38	55
AT1G01020.2	52.38	55
AT1G01030.1	77.58	76.19
AT1G01040.1	99.13	99.13
AT1G01040.2	100	100
AT1G01050.1	100	100
AT1G01080.1	100	100
AT1G01080.2	100	100
AT1G01090.1	9.09	8.7
AT1G01100.1	100	100
AT1G01100.2	41.18	36.84
AT1G01100.3	41.18	41.18
AT1G01100.4	100	100
AT1G01120.1	47.06	47.06
AT1G01140.1	56.67	65.38
AT1G01140.2	56.67	65.38
AT1G01140.3	56.67	65.38
AT1G01160.1	81.16	75.68
AT1G01160.2	95.65	94.29
AT1G01170.1	62.96	62.96
AT1G01170.2	0	0
AT1G01210.1	42.86	45
AT1G01220.1	36.67	38.82
AT1G01230.1	52.17	52.17
AT1G01240.1	58.97	53.49
AT1G01240.2	17.91	18.46
AT1G01240.3	100	100
AT1G01290.1	NA	NA
AT1G01290.2	NA	NA
AT1G01300.1	100	100
AT1G01320.1	46.3	47.17
AT1G01320.2	57.14	57.14
AT1G01350.1	36	35.29
AT1G01360.1	100	100
AT1G01430.1	100	100
AT1G01440.1	45	41.86
AT1G01470.1	52.38	42.31
AT1G01490.1	75	77.27
AT1G01490.2	83.78	88.57
AT1G01500.1	100	100
AT1G01510.1	NA	NA
AT1G01540.1	42.55	44.44
AT1G01540.2	50.91	52.83
AT1G01550.1	77.97	82.14
AT1G01550.2	6.12	6.38
AT1G01610.1	50	60
AT1G01620.1	0	0
AT1G01620.2	72.28	73.74
AT1G01630.1	100	100
AT1G01710.1	35.29	31.58
AT1G01730.1	100	100
AT1G01770.1	100	96.97
AT1G01780.1	100	100
AT1G01790.1	93.1	96.43
AT1G01800.1	100	100
AT1G01800.2	87.04	85.45
AT1G01820.1	71.79	75.68
AT1G01830.1	92.42	91.04
AT1G01830.2	23.94	23.94
AT1G01830.3	77.97	80.23
AT1G01840.1	8.33	7.14
AT1G01860.1	100	100
AT1G01910.1	100	100
AT1G01910.2	100	100
AT1G01910.3	100	100
AT1G01910.4	100	100
AT1G01910.5	56.52	50
AT1G01920.2	100	100
AT1G01930.1	42.86	46.15
AT1G01940.1	100	100
AT1G01950.1	69.57	66.67
AT1G01950.2	69.57	66.67
AT1G01950.3	69.57	66.67
AT1G01970.1	95.83	97.22
AT1G01990.1	60	63.16
AT1G02000.1	24	27.27
AT1G02020.1	100	100
AT1G02020.2	100	100
AT1G02050.1	38.89	43.75
AT1G02080.2	90	93.75
AT1G02090.1	100	100
AT1G02090.2	100	100
AT1G02090.3	100	100
AT1G02100.1	100	83.33
AT1G02100.2	10	7.14
AT1G02100.3	40	26.67
AT1G02110.1	100	100
AT1G02130.1	58.33	56
AT1G02140.1	100	100
AT1G02145.1	0	0
AT1G02145.2	96.15	94.94
AT1G02145.3	0	0
AT1G02145.4	96.15	94.94
AT1G02150.1	23.81	23.81
AT1G02160.1	100	100
AT1G02160.2	100	100
AT1G02170.1	85.19	76.67
AT1G02205.1	47.22	48.34
AT1G02205.2	100	100
AT1G02205.3	64.71	57.89
AT1G02270.1	100	87.5
AT1G02280.1	100	100
AT1G02280.2	100	100
AT1G02305.1	0	0
AT1G02330.1	28	31.82
AT1G02335.1	100	100
AT1G02410.1	100	100
AT1G02450.1	NA	NA
AT1G02475.1	20	21.74
AT1G02500.1	64.71	61.11
AT1G02500.2	0	0
AT1G02560.1	100	100
AT1G02610.1	27.5	27.5
AT1G02660.1	35.21	34.25
AT1G02680.1	39.47	39.47
AT1G02730.1	100	100
AT1G02750.1	75.51	86.05
AT1G02750.2	69.23	75
AT1G02780.1	66.67	71.43
AT1G02840.1	0	0
AT1G02840.2	91.67	100
AT1G02840.3	73.91	70.83
AT1G02860.1	46.81	46.81
AT1G02870.1	81.82	85.71
AT1G02880.3	100	100
AT1G02880.4	40.86	44.71
AT1G02890.1	100	100
AT1G02890.2	100	100
AT1G02910.1	100	100
AT1G02920.1	33.33	37.5
AT1G02930.1	97.06	100
AT1G02930.2	88.64	81.25
AT1G02960.1	100	100
AT1G02960.2	100	100
AT1G02960.3	100	100
AT1G02990.1	94.02	94.83
AT1G02990.2	94.02	94.83
AT1G02990.3	100	100
AT1G03030.1	79.17	86.36
AT1G03040.1	100	100
AT1G03040.2	100	100
AT1G03080.1	35.4	37.74
AT1G03090.1	90	90
AT1G03090.2	90	90
AT1G03130.1	78.57	100
AT1G03140.1	100	100
AT1G03150.1	0	0
AT1G03160.1	100	100
AT1G03160.2	100	100
AT1G03220.1	NA	NA
AT1G03230.1	NA	NA
AT1G03250.1	36.07	40
AT1G03250.2	46.77	52.73
AT1G03280.1	68.89	65.96
AT1G03290.1	100	100
AT1G03290.2	90	86.17
AT1G03330.1	81.01	82.05
AT1G03350.1	85.37	85.37
AT1G03360.1	87.5	84.85
AT1G03365.1	52.5	48.84
AT1G03370.1	89.8	89.11
AT1G03380.1	63.64	61.6
AT1G03400.1	NA	NA
AT1G03410.1	23.81	25.51
AT1G03430.1	40.96	38.64
AT1G03470.1	65.12	63.64
AT1G03470.2	0	0
AT1G03475.1	100	100
AT1G03530.1	100	100
AT1G03590.1	43.93	45.19
AT1G03600.1	100	100
AT1G03610.1	97.2	97.2
AT1G03630.1	30.77	30.77
AT1G03630.2	75	75
AT1G03680.1	44.83	53.06
AT1G03740.1	65.38	63.98
AT1G03740.2	65.38	63.98
AT1G03760.1	22.22	20
AT1G03770.1	62.75	56.14
AT1G03780.1	100	71.43
AT1G03780.2	86.96	83.33
AT1G03780.3	80	75
AT1G03820.1	NA	NA
AT1G03830.2	66.67	65
AT1G03860.1	100	100
AT1G03860.2	57.14	57.14
AT1G03860.3	100	100
AT1G03870.1	82.35	93.33
AT1G03900.1	100	100
AT1G03910.1	47.83	52.38
AT1G03910.2	47.83	52.38
AT1G03930.1	45.33	44.29
AT1G03950.1	100	100
AT1G03970.1	88.24	88.24
AT1G04040.1	0	0
AT1G04070.1	93.75	93.75
AT1G04080.1	29.63	28.07
AT1G04080.2	100	100
AT1G04080.3	66.67	65.62
AT1G04120.1	92.73	91.07
AT1G04140.1	66.3	64.89
AT1G04140.2	66.3	64.89
AT1G04170.1	56.14	62.75
AT1G04190.1	0	0
AT1G04200.1	28.79	29.23
AT1G04230.1	100	100
AT1G04240.1	0	0
AT1G04250.1	100	100
AT1G04260.1	22.22	23.53
AT1G04270.1	0	0
AT1G04270.2	47.06	40
AT1G04280.1	100	100
AT1G04290.1	66.13	64.06
AT1G04300.1	98.11	98.11
AT1G04300.2	19.81	20.81
AT1G04300.3	98.11	98.11
AT1G04300.4	100	97.62
AT1G04340.1	86.36	82.61
AT1G04350.1	90.62	74.36
AT1G04400.1	50	51.45
AT1G04400.2	83.7	81.05
AT1G04410.1	100	100
AT1G04420.1	100	100
AT1G04430.1	75	80.23
AT1G04430.2	78.79	80
AT1G04440.1	47.57	48.35
AT1G04480.1	NA	NA
AT1G04510.1	89.36	91.3
AT1G04510.2	89.36	91.3
AT1G04520.1	20.69	25
AT1G04530.1	92.5	92.5
AT1G04550.1	80	76.6
AT1G04550.2	80	76.6
AT1G04590.1	NA	NA
AT1G04590.2	NA	NA
AT1G04620.1	52.94	52.94
AT1G04630.1	100	100
AT1G04635.1	0	0
AT1G04640.1	0	0
AT1G04640.2	76.92	79.14
AT1G04680.1	85.71	78.26
AT1G04690.1	53.57	65.22
AT1G04710.1	100	100
AT1G04750.1	42.22	46.34
AT1G04750.2	90.91	90.91
AT1G04770.1	100	81.25
AT1G04780.1	83.26	83.64
AT1G04790.1	57.14	52.17
AT1G04800.1	0	0
AT1G04810.1	91.89	91.89
AT1G04820.1	25	22.58
AT1G04830.1	72.97	77.14
AT1G04850.1	100	100
AT1G04860.1	41.1	38.46
AT1G04870.1	86.96	86.96
AT1G04870.2	100	100
AT1G04900.1	100	100
AT1G04910.1	50	51.61
AT1G04940.1	85.11	85.11
AT1G04950.1	100	100
AT1G04950.2	26.92	25
AT1G04950.3	100	100
AT1G04960.1	94.03	96.92
AT1G04960.2	90.45	89.87
AT1G04980.1	100	100
AT1G04985.1	51.79	50
AT1G04990.2	68.89	64.58
AT1G05010.1	100	100
AT1G05060.1	NA	NA
AT1G05070.1	77.42	81.36
AT1G05120.1	NA	NA
AT1G05140.1	100	100
AT1G05150.1	91.78	94.37
AT1G05180.1	100	94.12
AT1G05180.2	39.74	38.27
AT1G05180.3	39.74	38.27
AT1G05190.1	100	100
AT1G05205.1	100	100
AT1G05270.1	53.33	50
AT1G05320.1	59.57	54.9
AT1G05320.2	7.55	7.69
AT1G05320.3	81.16	78.87
AT1G05350.1	100	100
AT1G05380.1	96.15	94.94
AT1G05380.2	95.35	94.25
AT1G05385.1	100	100
AT1G05410.1	52.63	52.63
AT1G05410.2	64.29	63.16
AT1G05430.1	91.3	100
AT1G05460.1	78.38	72.5
AT1G05500.1	100	100
AT1G05560.1	29.41	35.71
AT1G05570.1	50	48.28
AT1G05570.2	50	48.28
AT1G05590.1	85.94	85.94
AT1G05630.1	100	100
AT1G05630.2	100	100
AT1G05720.1	100	100
AT1G05780.1	100	100
AT1G05790.2	69.55	69.29
AT1G05805.1	0	0
AT1G05830.1	100	100
AT1G05830.2	100	100
AT1G05840.1	95.24	93.02
AT1G05850.1	100	100
AT1G05870.1	84.62	100
AT1G05870.2	50	57.14
AT1G05870.3	50	57.14
AT1G05870.4	50	57.14
AT1G05890.1	75.64	74.68
AT1G05890.2	90	88.39
AT1G05910.1	13.89	10.42
AT1G05940.1	100	100
AT1G05960.1	100	96.61
AT1G05960.2	96.67	98.31
AT1G06010.1	100	100
AT1G06040.1	57.14	57.14
AT1G06040.2	57.14	57.14
AT1G06060.1	84.38	93.1
AT1G06070.1	92.31	93.51
AT1G06110.1	33.33	27.78
AT1G06130.1	78.57	78.57
AT1G06130.2	100	100
AT1G06149.1	32.91	31.71
AT1G06150.2	62.5	62.13
AT1G06190.1	100	100
AT1G06190.2	100	100
AT1G06200.1	15.79	13.64
AT1G06210.1	20	20
AT1G06210.2	20	20
AT1G06220.1	90	90
AT1G06220.2	97.59	100
AT1G06230.1	55.97	55.56
AT1G06230.2	35.2	35.48
AT1G06230.3	15.27	15.75
AT1G06290.1	100	100
AT1G06360.1	100	100
AT1G06390.1	100	100
AT1G06390.2	90	81.82
AT1G06400.1	41.18	30.43
AT1G06410.1	58.33	67.74
AT1G06420.1	86.67	100
AT1G06420.2	0	0
AT1G06430.1	100	100
AT1G06460.1	94.29	100
AT1G06470.1	98.25	100
AT1G06470.2	71.94	72.06
AT1G06475.1	33.33	38.71
AT1G06500.1	100	100
AT1G06500.2	100	100
AT1G06500.3	88.57	89.86
AT1G06500.4	50	39.13
AT1G06510.1	0	0
AT1G06515.1	71.11	76.19
AT1G06515.2	96.77	96.77
AT1G06530.1	100	100
AT1G06550.1	100	96.67
AT1G06640.1	100	100
AT1G06640.2	100	100
AT1G06640.3	100	100
AT1G06645.1	57.14	60
AT1G06650.1	0	0
AT1G06650.2	66.67	54.55
AT1G06670.1	100	100
AT1G06680.1	0	0
AT1G06680.2	100	100
AT1G06690.1	60	60
AT1G06700.1	68	70.83
AT1G06700.2	25.85	25
AT1G06720.1	100	100
AT1G06760.1	60	75
AT1G06790.1	100	100
AT1G06820.1	100	100
AT1G06830.1	0	0
AT1G06850.1	100	100
AT1G06850.2	100	100
AT1G06890.1	73.81	76.54
AT1G06890.2	100	100
AT1G06890.3	73.81	76.54
AT1G06900.1	45.16	45.16
AT1G06910.1	100	100
AT1G06950.1	56	58.33
AT1G06960.1	81.82	78.26
AT1G06960.2	100	100
AT1G06960.3	100	100
AT1G07000.1	NA	NA
AT1G07010.1	0	0
AT1G07010.2	87.5	87.5
AT1G07010.3	0	0
AT1G07020.1	100	100
AT1G07030.1	45.88	48.75
AT1G07040.1	93.06	94.37
AT1G07050.1	0	0
AT1G07070.1	100	100
AT1G07080.1	100	95
AT1G07110.1	43.14	37.93
AT1G07135.1	NA	NA
AT1G07140.1	100	100
AT1G07170.1	13.51	13.16
AT1G07170.2	100	100
AT1G07170.3	61.61	65.09
AT1G07200.1	62.24	60.54
AT1G07210.1	54.17	52
AT1G07220.1	66.67	80
AT1G07230.1	68.89	63.27
AT1G07250.1	50	50
AT1G07280.1	94.2	95.59
AT1G07280.2	80	78.69
AT1G07280.3	94.83	93.22
AT1G07310.1	0	0
AT1G07320.1	82.35	83.33
AT1G07320.2	82.35	83.33
AT1G07320.3	0	0
AT1G07320.4	0	0
AT1G07350.2	100	100
AT1G07360.1	0	0
AT1G07370.1	31.25	35.71
AT1G07400.1	38.1	38.71
AT1G07420.1	100	100
AT1G07420.2	78.03	76.3
AT1G07430.1	33.96	32.73
AT1G07440.1	62.5	62.5
AT1G07440.2	62.5	62.5
AT1G07470.1	97.83	100
AT1G07480.1	18.6	15.69
AT1G07480.2	76.54	78.48
AT1G07510.1	97.03	97.03
AT1G07530.1	98.53	98.53
AT1G07590.1	25.13	24.26
AT1G07610.1	75	100
AT1G07615.1	100	100
AT1G07630.1	69.23	69.23
AT1G07640.1	31.15	31.67
AT1G07640.2	100	100
AT1G07640.3	83.58	82.35
AT1G07650.1	97.3	97.3
AT1G07650.2	100	100
AT1G07660.1	94.44	94.44
AT1G07660.2	31.48	30.91
AT1G07670.1	65.22	71.43
AT1G07700.1	16.67	15.38
AT1G07700.2	63.22	62.5
AT1G07700.3	58.02	59.42
AT1G07720.1	100	100
AT1G07770.1	71.05	77.14
AT1G07770.2	73.17	83.33
AT1G07780.1	64.58	60.78
AT1G07780.2	23.08	24.32
AT1G07780.3	46.15	48.89
AT1G07780.4	46.15	49.25
AT1G07780.5	59.46	57.14
AT1G07790.1	77.78	100
AT1G07810.1	41.86	41.86
AT1G07820.1	78.43	72.73
AT1G07820.2	25	25
AT1G07830.1	79.55	83.33
AT1G07840.1	100	100
AT1G07840.2	9.59	8.97
AT1G07840.3	100	100
AT1G07890.1	79.66	70.15
AT1G07890.2	87.5	84.34
AT1G07890.3	100	100
AT1G07890.4	86.11	86.11
AT1G07890.5	100	100
AT1G07890.6	79.66	70.15
AT1G07890.7	100	100
AT1G07890.8	55.42	54.12
AT1G07920.1	100	100
AT1G07930.1	100	90.91
AT1G07930.2	100	90.91
AT1G07940.1	100	100
AT1G07940.2	100	100
AT1G07950.1	90	100
AT1G07960.1	94.12	96.97
AT1G07960.2	54.12	55.09
AT1G07960.3	100	100
AT1G07980.1	100	100
AT1G07990.1	40	41.27
AT1G08000.1	71.43	72.73
AT1G08000.2	96.15	98.68
AT1G08010.1	69.39	68
AT1G08010.2	100	100
AT1G08030.1	66.67	71.05
AT1G08040.1	26.09	27.27
AT1G08040.2	26.79	26.79
AT1G08110.1	100	93.1
AT1G08110.2	75.82	74.47
AT1G08110.3	86.96	90.91
AT1G08110.4	100	100
AT1G08125.1	100	100
AT1G08125.2	88.14	85.25
AT1G08125.3	100	100
AT1G08130.1	97.14	97.14
AT1G08160.1	100	100
AT1G08180.1	100	100
AT1G08190.1	66.67	63.16
AT1G08200.1	23.81	23.81
AT1G08230.2	NA	NA
AT1G08315.1	85.71	85.71
AT1G08360.1	31.82	29.17
AT1G08370.1	100	96.55
AT1G08380.1	65.38	62.96
AT1G08410.1	96.77	96.77
AT1G08420.1	30.91	33.33
AT1G08420.2	45.71	44.14
AT1G08450.1	100	100
AT1G08450.2	0	0
AT1G08450.3	100	100
AT1G08460.1	90	90
AT1G08465.1	100	100
AT1G08470.1	70.59	54.55
AT1G08480.1	93.75	85.71
AT1G08490.1	100	100
AT1G08510.1	89.22	88.35
AT1G08520.1	100	100
AT1G08530.1	100	100
AT1G08540.1	80	80
AT1G08550.1	62.5	64.1
AT1G08550.2	100	93.62
AT1G08560.1	60	62.07
AT1G08570.1	100	100
AT1G08570.2	100	100
AT1G08570.3	51.61	51.59
AT1G08570.4	83.84	83.17
AT1G08580.1	100	100
AT1G08600.1	45.45	48.61
AT1G08600.2	44.74	46.58
AT1G08600.3	21.21	22.58
AT1G08600.4	45.45	48.61
AT1G08610.1	67.78	67.03
AT1G08620.1	100	100
AT1G08620.2	38.64	42.5
AT1G08640.1	30.77	33.33
AT1G08650.1	100	77.78
AT1G08650.2	100	77.78
AT1G08660.1	100	100
AT1G08660.2	100	100
AT1G08680.1	100	100
AT1G08680.2	100	100
AT1G08680.3	85.07	82.61
AT1G08680.4	100	100
AT1G08700.1	62.07	60
AT1G08710.1	100	100
AT1G08710.2	100	100
AT1G08720.1	50	50
AT1G08760.1	86.96	86.96
AT1G08780.1	33.33	35.71
AT1G08800.1	100	100
AT1G08800.2	78.45	75.83
AT1G08810.1	40	42.86
AT1G08810.2	100	100
AT1G08820.1	89.8	87.13
AT1G08820.2	9.8	9.09
AT1G08830.1	36.84	35.9
AT1G08830.2	95	90.48
AT1G08845.1	59.62	60.78
AT1G08880.1	57.14	57.14
AT1G08890.1	NA	NA
AT1G08930.1	38.46	40.54
AT1G08930.2	51.28	52.63
AT1G08970.1	52.94	56.25
AT1G08970.2	51.43	56.25
AT1G08970.3	51.43	56.25
AT1G08970.4	23.76	23.12
AT1G08980.1	100	100
AT1G09010.1	100	100
AT1G09020.1	37.84	37.63
AT1G09060.1	100	100
AT1G09060.2	78.57	88
AT1G09060.3	100	100
AT1G09070.1	100	100
AT1G09100.1	100	96
AT1G09130.1	23.08	27.27
AT1G09130.2	23.08	27.27
AT1G09130.3	100	100
AT1G09140.1	27.03	27.78
AT1G09140.2	27.03	27.78
AT1G09150.1	68.75	69.84
AT1G09160.1	91.04	95.31
AT1G09160.2	100	100
AT1G09200.1	66.67	100
AT1G09210.1	20	17.24
AT1G09250.1	7.14	8.33
AT1G09270.1	100	100
AT1G09270.2	100	100
AT1G09270.3	65.31	68.09
AT1G09290.1	100	100
AT1G09300.2	71.76	72.43
AT1G09310.1	100	100
AT1G09320.1	91.18	88.57
AT1G09330.1	100	98.41
AT1G09340.1	64.71	61.11
AT1G09415.1	92	93.88
AT1G09430.1	100	100
AT1G09440.1	94.64	96.36
AT1G09470.1	0	0
AT1G09470.2	7.79	8.22
AT1G09490.1	100	100
AT1G09490.2	100	100
AT1G09560.1	92.31	100
AT1G09570.1	57.58	53.52
AT1G09570.2	38.67	37.91
AT1G09575.1	96	100
AT1G09580.1	66.67	58.82
AT1G09590.1	100	100
AT1G09620.1	100	100
AT1G09630.1	100	100
AT1G09640.1	42.86	38.46
AT1G09640.2	60	55.56
AT1G09645.1	61.9	62.9
AT1G09660.1	95	93.44
AT1G09660.2	95	93.44
AT1G09690.1	100	100
AT1G09700.1	90.77	90.77
AT1G09730.1	80.56	80.56
AT1G09730.2	80.56	80.56
AT1G09740.1	100	100
AT1G09750.1	NA	NA
AT1G09760.1	100	100
AT1G09770.1	100	87.04
AT1G09780.1	100	87.5
AT1G09794.1	100	100
AT1G09795.1	100	91.67
AT1G09815.1	68.42	65
AT1G09830.1	0	0
AT1G09840.1	48.62	46.9
AT1G09840.2	17.65	16.9
AT1G09840.3	82.96	83.58
AT1G09840.4	43.04	40.48
AT1G09840.5	30.28	27.97
AT1G09840.6	94.02	93.22
AT1G09850.1	0	0
AT1G09870.1	52.38	55
AT1G09920.1	83.87	85.25
AT1G09940.1	100	100
AT1G09970.1	11.11	13.04
AT1G09970.2	27.27	23.08
AT1G10020.1	91.3	88.73
AT1G10060.1	0	0
AT1G10060.2	0	0
AT1G10090.1	34.19	33.06
AT1G10120.1	39.92	39.11
AT1G10150.1	58.54	56.47
AT1G10200.1	100	96.3
AT1G10230.1	100	100
AT1G10270.1	NA	NA
AT1G10290.1	65.52	65.52
AT1G10310.1	30	50
AT1G10350.1	92	90.2
AT1G10360.1	27.27	33.33
AT1G10390.1	54.17	54.62
AT1G10390.2	89.69	86.14
AT1G10410.1	23.89	23.28
AT1G10430.1	88.14	85.25
AT1G10450.1	73.33	75.49
AT1G10470.1	63.16	67.92
AT1G10500.1	100	100
AT1G10510.1	88.46	88.46
AT1G10522.1	65.82	65
AT1G10522.2	100	100
AT1G10550.1	100	100
AT1G10570.1	0	0
AT1G10570.2	100	100
AT1G10580.1	0	0
AT1G10590.1	52	68.42
AT1G10590.2	31.25	29.41
AT1G10590.3	100	100
AT1G10600.1	100	100
AT1G10600.2	73.58	63.93
AT1G10600.3	0	0
AT1G10610.1	69.23	67.74
AT1G10630.1	0	0
AT1G10650.1	84.54	82.83
AT1G10650.2	92.35	92.86
AT1G10660.1	81.69	78.38
AT1G10660.2	93.94	95.88
AT1G10660.3	77.65	79.52
AT1G10660.4	86.52	88.51
AT1G10670.1	100	100
AT1G10670.2	100	100
AT1G10670.3	100	100
AT1G10670.4	100	100
AT1G10700.1	53.33	47.06
AT1G10720.1	NA	NA
AT1G10740.4	48.12	48.85
AT1G10760.1	100	100
AT1G10820.2	57.89	55.93
AT1G10830.1	55.56	71.43
AT1G10830.2	NA	NA
AT1G10840.1	90.62	92.06
AT1G10840.2	70.7	72.55
AT1G10850.1	89.31	86.59
AT1G10865.1	68.42	59.09
AT1G10865.2	73.33	50
AT1G10870.1	97.37	97.37
AT1G10890.1	97.87	95.83
AT1G10900.1	60.66	57.81
AT1G10910.1	100	100
AT1G10930.1	100	100
AT1G10940.1	60.47	60.94
AT1G10940.2	75.69	75.17
AT1G10950.1	71.88	82.14
AT1G10960.1	100	100
AT1G11020.1	86.3	81.82
AT1G11170.1	100	100
AT1G11210.1	100	100
AT1G11240.1	21.74	21.74
AT1G11260.1	0	0
AT1G11280.1	100	100
AT1G11280.2	100	100
AT1G11280.3	100	100
AT1G11280.4	100	100
AT1G11310.1	56.57	58.95
AT1G11310.2	56.57	58.95
AT1G11330.1	86.05	88.1
AT1G11330.2	100	100
AT1G11350.1	0	0
AT1G11360.1	46.3	47.17
AT1G11360.2	46.3	47.17
AT1G11360.3	46.3	47.17
AT1G11360.4	46.3	47.17
AT1G11380.1	78.57	73.33
AT1G11400.1	43.33	44.07
AT1G11400.2	38.03	38.03
AT1G11400.3	100	100
AT1G11430.1	100	100
AT1G11440.1	85.71	85.71
AT1G11475.1	0	0
AT1G11480.1	9.8	9.09
AT1G11480.2	39.06	35.21
AT1G11530.1	100	90.91
AT1G11580.1	100	42.86
AT1G11630.1	100	100
AT1G11650.1	14.29	12.9
AT1G11650.2	14.29	12.9
AT1G11660.1	11.43	10.81
AT1G11680.1	15.52	16.98
AT1G11700.1	100	100
AT1G11720.1	100	100
AT1G11720.2	100	100
AT1G11750.1	100	100
AT1G11750.2	71.43	73.53
AT1G11755.1	97.7	96.59
AT1G11790.1	87.5	90.32
AT1G11820.1	80	84.62
AT1G11820.2	72.84	71.08
AT1G11840.1	100	100
AT1G11840.2	100	100
AT1G11840.3	73.33	68.75
AT1G11840.4	100	100
AT1G11840.5	100	100
AT1G11840.6	78.12	75.76
AT1G11850.1	0	0
AT1G11850.2	0	0
AT1G11850.3	0	0
AT1G11850.4	0	0
AT1G11860.1	67.35	71.74
AT1G11860.2	100	100
AT1G11860.3	100	100
AT1G11870.1	100	100
AT1G11870.2	100	100
AT1G11870.3	100	100
AT1G11890.1	100	100
AT1G11905.1	16.13	15.62
AT1G11910.1	56	70
AT1G11930.1	100	100
AT1G11930.2	100	100
AT1G11960.1	100	100
AT1G12000.1	73.91	70.83
AT1G12020.1	100	100
AT1G12050.1	100	100
AT1G12080.1	100	100
AT1G12080.2	100	100
AT1G12090.1	37.04	41.67
AT1G12120.1	54.9	58.33
AT1G12140.1	NA	NA
AT1G12140.2	NA	NA
AT1G12230.1	100	100
AT1G12230.2	100	100
AT1G12240.1	100	100
AT1G12244.1	100	100
AT1G12250.1	100	100
AT1G12250.2	67.61	70.59
AT1G12270.1	100	100
AT1G12310.1	100	100
AT1G12320.1	42.86	33.33
AT1G12330.1	NA	NA
AT1G12360.1	99.02	100
AT1G12410.1	100	100
AT1G12420.1	6.15	6.67
AT1G12430.1	65.08	59.42
AT1G12430.2	88.89	86.15
AT1G12440.1	49.4	54.67
AT1G12440.2	98.54	99.51
AT1G12470.1	95.83	100
AT1G12500.1	21.74	26.32
AT1G12520.1	100	100
AT1G12520.2	95.58	95.54
AT1G12520.3	75	74.57
AT1G12530.1	NA	NA
AT1G12580.1	49.4	49.4
AT1G12650.1	100	100
AT1G12650.2	32.14	28.12
AT1G12650.3	73.08	76
AT1G12650.4	73.08	76
AT1G12680.1	66.67	67.42
AT1G12750.1	35.79	34.69
AT1G12750.2	67.07	65.88
AT1G12750.3	77.06	76.16
AT1G12760.1	26.42	24.56
AT1G12760.2	36.11	36.45
AT1G12770.1	88.3	86.46
AT1G12780.1	35.19	34.55
AT1G12800.1	84.09	90.24
AT1G12810.1	61.11	57.89
AT1G12810.2	61.11	57.89
AT1G12820.1	89.91	85.96
AT1G12830.1	100	100
AT1G12840.1	0	0
AT1G12850.1	100	100
AT1G12860.1	95.58	94.74
AT1G12880.1	80.41	78.79
AT1G12900.1	100	100
AT1G12900.2	60.91	61.47
AT1G12900.3	57.45	60
AT1G12900.4	90	87.8
AT1G12910.1	93.88	93.88
AT1G12920.1	46.94	51.11
AT1G12930.1	84.62	84.62
AT1G12970.1	100	100
AT1G13000.1	75.4	76
AT1G13000.2	20.75	21.15
AT1G13020.1	29.41	34.09
AT1G13030.1	97.37	97.37
AT1G13060.1	100	90.48
AT1G13060.2	100	95.35
AT1G13090.1	100	100
AT1G13110.1	0	0
AT1G13120.1	58.94	59.33
AT1G13160.1	100	100
AT1G13170.1	100	100
AT1G13170.2	100	100
AT1G13190.1	88.89	90.57
AT1G13210.1	100	100
AT1G13220.1	56.25	50
AT1G13245.1	50	50
AT1G13250.1	54.55	75
AT1G13260.1	51.06	54.55
AT1G13270.1	100	100
AT1G13270.2	100	100
AT1G13280.1	100	97.73
AT1G13320.1	11.11	12.5
AT1G13320.2	11.11	12.5
AT1G13320.3	100	100
AT1G13350.1	100	100
AT1G13350.2	100	100
AT1G13360.1	84.21	88.89
AT1G13360.2	7.69	7.69
AT1G13360.3	7.69	7.69
AT1G13380.1	100	100
AT1G13390.1	76	73.08
AT1G13390.2	91.46	98.68
AT1G13440.1	75	78.95
AT1G13440.2	100	100
AT1G13450.1	100	100
AT1G13450.2	97.4	96.15
AT1G13450.3	NA	NA
AT1G13460.1	98.53	100
AT1G13460.2	98.92	100
AT1G13470.1	50	37.5
AT1G13560.1	100	97.96
AT1G13560.2	78.41	78.41
AT1G13640.1	68.03	66.94
AT1G13690.1	91.3	88
AT1G13730.1	16	16.44
AT1G13740.1	98.85	98.85
AT1G13810.1	100	100
AT1G13820.1	100	100
AT1G13870.1	85.71	70.59
AT1G13880.1	58.14	58.14
AT1G13900.1	100	100
AT1G13930.1	100	100
AT1G13930.2	100	100
AT1G13930.3	100	100
AT1G13950.1	100	91.67
AT1G13960.1	100	100
AT1G13960.2	96.23	96.23
AT1G13980.1	29.33	31.43
AT1G13980.2	14.43	14.89
AT1G13990.1	100	100
AT1G13990.2	100	100
AT1G13990.3	100	100
AT1G14000.1	52.63	48.39
AT1G14010.1	28.57	30.77
AT1G14030.1	100	100
AT1G14060.1	94.44	87.18
AT1G14140.1	0	0
AT1G14150.1	NA	NA
AT1G14150.2	NA	NA
AT1G14170.1	46.34	51.35
AT1G14170.2	100	100
AT1G14170.3	100	100
AT1G14200.1	14.71	15.15
AT1G14250.1	92.86	96.3
AT1G14270.1	100	100
AT1G14270.2	84.9	88.11
AT1G14270.3	90.21	91.49
AT1G14270.4	91.98	91.12
AT1G14280.1	NA	0
AT1G14300.1	100	100
AT1G14300.2	100	100
AT1G14320.1	87.5	87.5
AT1G14320.2	87.5	87.5
AT1G14330.1	100	100
AT1G14345.1	NA	NA
AT1G14350.1	0	0
AT1G14350.2	73.33	77.78
AT1G14360.1	40.62	37.14
AT1G14380.1	38.78	40.43
AT1G14380.2	38.78	40.43
AT1G14380.3	97.22	97.22
AT1G14400.1	54.29	56.72
AT1G14400.2	32	28.57
AT1G14410.1	16	16.67
AT1G14440.1	61.74	59.66
AT1G14440.2	33.96	33.96
AT1G14450.1	100	100
AT1G14460.1	100	100
AT1G14510.1	100	100
AT1G14570.1	100	93.02
AT1G14570.2	100	100
AT1G14570.3	100	93.02
AT1G14570.4	100	100
AT1G14580.1	77.11	77.11
AT1G14580.2	92.86	92.86
AT1G14610.1	0	0
AT1G14620.1	100	100
AT1G14620.2	100	100
AT1G14650.1	90.91	97.56
AT1G14650.2	90.91	97.56
AT1G14670.1	87.5	58.33
AT1G14685.1	100	94.44
AT1G14685.2	77.78	79.75
AT1G14685.3	98.7	98.71
AT1G14687.1	100	100
AT1G14690.1	98.98	100
AT1G14690.2	98.21	98.21
AT1G14710.1	100	100
AT1G14710.2	100	100
AT1G14720.1	100	100
AT1G14740.1	0	0
AT1G14810.1	100	100
AT1G14820.1	64.21	65.59
AT1G14820.3	100	100
AT1G14830.1	96.55	94.92
AT1G14840.1	66.67	65
AT1G14840.2	85.94	88.71
AT1G14880.1	0	0
AT1G14890.1	100	100
AT1G14900.1	30	50
AT1G14910.1	100	100
AT1G14980.1	0	0
AT1G14990.1	93.1	100
AT1G14990.2	19.44	20.59
AT1G15000.1	100	100
AT1G15020.1	100	100
AT1G15020.2	100	100
AT1G15030.1	100	100
AT1G15060.1	100	92.31
AT1G15120.1	100	100
AT1G15130.1	100	93.33
AT1G15140.1	96.83	100
AT1G15140.2	78.33	78.33
AT1G15140.3	96.83	100
AT1G15180.1	100	100
AT1G15180.2	25.62	25.2
AT1G15200.1	62.96	61.82
AT1G15200.2	62.96	61.82
AT1G15200.3	62.96	61.82
AT1G15200.4	62.96	61.82
AT1G15230.1	100	100
AT1G15240.2	90.91	91.74
AT1G15250.1	86.96	90.91
AT1G15260.1	40	42.11
AT1G15270.1	100	100
AT1G15280.1	93.1	100
AT1G15280.2	11.11	11.54
AT1G15290.1	0	0
AT1G15310.1	90.32	87.5
AT1G15340.1	81.36	82.76
AT1G15340.2	81.36	82.76
AT1G15350.1	64	67.37
AT1G15350.2	65.52	67.06
AT1G15350.3	69.77	71.09
AT1G15370.1	26.67	23.53
AT1G15390.1	100	100
AT1G15400.1	100	100
AT1G15400.2	100	100
AT1G15420.1	83.33	83.33
AT1G15470.1	68.75	58.67
AT1G15480.1	100	100
AT1G15500.1	100	100
AT1G15660.1	100	100
AT1G15690.1	100	100
AT1G15690.2	100	100
AT1G15710.1	85.71	85.71
AT1G15730.1	66.67	75
AT1G15740.1	64.1	67.57
AT1G15750.1	100	100
AT1G15750.2	52.53	52.53
AT1G15750.3	95.56	96.99
AT1G15750.4	87.5	82.35
AT1G15780.1	100	100
AT1G15790.1	100	100
AT1G15790.2	0	0
AT1G15810.1	100	100
AT1G15820.1	100	100
AT1G15860.1	50	53.57
AT1G15860.2	6.52	7.14
AT1G15860.3	50	53.57
AT1G15880.1	68.83	71.62
AT1G15885.1	100	100
AT1G15910.1	82.86	100
AT1G15930.1	92.59	89.29
AT1G15930.2	88.89	88.89
AT1G15940.1	80	84.85
AT1G15950.1	40	41.67
AT1G15950.2	40	41.67
AT1G15970.1	100	100
AT1G15980.1	NA	NA
AT1G16000.1	100	100
AT1G16010.1	25.24	24.51
AT1G16010.2	100	100
AT1G16010.3	39.22	38.24
AT1G16040.1	100	100
AT1G16080.1	100	100
AT1G16170.1	70	59.76
AT1G16180.1	93.48	97.73
AT1G16180.2	100	97.78
AT1G16190.1	20.69	19.35
AT1G16210.1	100	100
AT1G16240.1	98.18	100
AT1G16240.2	100	100
AT1G16240.3	98.18	100
AT1G16260.1	31.82	36.84
AT1G16260.2	100	100
AT1G16270.1	12	12.77
AT1G16270.2	84.77	85.33
AT1G16320.1	100	100
AT1G16410.1	58.33	58.33
AT1G16410.2	100	100
AT1G16430.1	100	100
AT1G16460.1	24.71	24.14
AT1G16460.2	94.23	100
AT1G16460.3	43.66	41.33
AT1G16460.4	85.71	88.42
AT1G16470.1	37.93	34.38
AT1G16470.2	100	100
AT1G16500.1	100	100
AT1G16520.1	81.82	87.8
AT1G16560.1	0	0
AT1G16560.2	100	100
AT1G16560.3	51.14	50
AT1G16560.4	35.71	35.21
AT1G16610.1	100	100
AT1G16610.2	15	15.79
AT1G16610.3	60.87	56
AT1G16630.1	100	100
AT1G16670.1	16.42	16.42
AT1G16680.1	98.28	98.28
AT1G16700.1	98.41	100
AT1G16720.1	92.59	96.15
AT1G16740.1	100	100
AT1G16790.1	88.46	100
AT1G16810.1	100	100
AT1G16810.2	100	100
AT1G16840.1	76.47	81.25
AT1G16840.2	6.25	6.25
AT1G16840.3	76.47	81.25
AT1G16840.4	20	16.67
AT1G16850.1	0	0
AT1G16858.1	45	43.55
AT1G16860.1	26.32	27.34
AT1G16870.1	96	88.89
AT1G16880.1	85.25	85.25
AT1G16880.2	91.3	100
AT1G16890.1	90.91	92.11
AT1G16890.2	62.22	70
AT1G16890.3	94.87	92.5
AT1G16916.1	100	100
AT1G16920.1	80.77	80.77
AT1G16960.1	56	51.85
AT1G17050.1	92.06	92.06
AT1G17070.1	35.71	41.67
AT1G17080.1	100	100
AT1G17100.1	88.89	84.21
AT1G17110.1	57.14	58.02
AT1G17110.2	30.34	30.34
AT1G17130.1	93.1	100
AT1G17130.2	93.1	100
AT1G17140.1	100	100
AT1G17140.2	72.22	69.33
AT1G17145.1	85.45	81.03
AT1G17160.1	100	100
AT1G17160.2	100	100
AT1G17210.1	70	67.74
AT1G17220.1	48.1	48.72
AT1G17280.1	78.05	72.73
AT1G17280.2	80.95	80.95
AT1G17290.1	86.49	82.05
AT1G17330.1	100	100
AT1G17340.1	59.7	54.05
AT1G17360.1	49.44	49.44
AT1G17370.1	10.34	11.11
AT1G17370.2	10.34	11.11
AT1G17380.1	90.24	90.24
AT1G17420.1	33.33	41.18
AT1G17430.1	0	0
AT1G17440.1	84.21	80
AT1G17440.2	100	100
AT1G17455.1	60.23	62.35
AT1G17455.2	98.86	98.86
AT1G17470.1	96	100
AT1G17470.2	92.31	100
AT1G17490.1	100	93.33
AT1G17510.1	57.69	57.69
AT1G17520.1	11.9	12.2
AT1G17530.1	100	90.48
AT1G17550.1	54.05	54.95
AT1G17580.1	100	100
AT1G17620.1	100	100
AT1G17650.1	100	100
AT1G17680.1	31.91	32.26
AT1G17680.2	33.33	37.5
AT1G17690.1	36.59	35.71
AT1G17720.1	32.67	34.74
AT1G17720.2	21.95	24
AT1G17730.1	100	100
AT1G17745.1	91.84	90
AT1G17745.2	100	100
AT1G17780.1	31.77	30.35
AT1G17780.2	56.52	53.72
AT1G17820.1	100	100
AT1G17840.1	96.43	96.43
AT1G17850.1	100	100
AT1G17850.2	100	100
AT1G17880.1	17.39	16
AT1G17890.1	80.49	84.62
AT1G17890.2	75.71	74.65
AT1G17890.3	11.86	12.96
AT1G17930.1	81.25	74.29
AT1G17970.1	52.17	50
AT1G17980.1	93.42	89.87
AT1G17980.2	42.13	40.81
AT1G17990.1	21.43	21.88
AT1G17990.2	26.03	30.65
AT1G18000.1	36.36	37.74
AT1G18010.1	100	100
AT1G18020.1	NA	NA
AT1G18030.1	33.33	41.67
AT1G18030.2	33.33	41.67
AT1G18060.1	94.87	100
AT1G18070.1	100	100
AT1G18070.2	100	100
AT1G18070.3	100	100
AT1G18080.1	100	100
AT1G18150.1	69.57	76.19
AT1G18150.2	79.17	86.36
AT1G18150.3	23.53	28.57
AT1G18160.1	100	100
AT1G18170.1	100	100
AT1G18190.1	58.54	57.14
AT1G18210.1	NA	NA
AT1G18210.2	NA	NA
AT1G18250.1	100	100
AT1G18250.2	100	100
AT1G18260.1	48.28	50
AT1G18265.1	100	100
AT1G18300.1	93.75	93.75
AT1G18370.1	90.62	90.62
AT1G18440.1	0	0
AT1G18450.1	0	0
AT1G18470.1	100	100
AT1G18470.2	100	93.75
AT1G18480.1	NA	NA
AT1G18490.1	41.36	39.9
AT1G18540.1	100	100
AT1G18580.1	53.41	54.02
AT1G18590.1	0	0
AT1G18620.1	76.92	78.95
AT1G18620.2	100	100
AT1G18630.1	92.59	100
AT1G18650.1	32	53.33
AT1G18660.1	84.38	91.53
AT1G18660.2	81.82	81.82
AT1G18660.3	70	65.12
AT1G18660.4	84.38	91.53
AT1G18700.1	100	100
AT1G18700.2	100	100
AT1G18700.4	70.59	70.59
AT1G18720.1	100	100
AT1G18730.1	NA	NA
AT1G18730.2	NA	NA
AT1G18730.3	NA	NA
AT1G18730.4	NA	NA
AT1G18740.1	40.38	40.38
AT1G18800.1	52.5	51.22
AT1G18810.1	35	35
AT1G18840.1	55.8	53.85
AT1G18840.2	97.76	97.76
AT1G18890.1	47.17	46.3
AT1G18950.1	86.67	86.67
AT1G19000.1	100	100
AT1G19000.2	100	100
AT1G19010.1	85.71	82.76
AT1G19010.2	83.33	78.43
AT1G19020.1	92.31	100
AT1G19050.1	38.89	46.67
AT1G19080.1	96.3	96.3
AT1G19080.2	64.65	60.95
AT1G19110.1	70	68.29
AT1G19120.1	0	0
AT1G19130.1	27.78	27.78
AT1G19150.1	100	100
AT1G19180.1	46	38.98
AT1G19180.2	58.66	56.15
AT1G19240.1	100	100
AT1G19300.1	95.45	95.45
AT1G19310.1	75	70.59
AT1G19350.1	89.19	84.62
AT1G19350.3	83.33	85.71
AT1G19350.4	88	84.62
AT1G19350.5	3.39	3.28
AT1G19350.6	100	100
AT1G19360.1	8.82	8
AT1G19370.1	43.08	44.44
AT1G19396.1	100	100
AT1G19396.3	100	100
AT1G19397.1	100	100
AT1G19400.1	79.68	78.42
AT1G19400.2	25	25
AT1G19430.1	71.43	70.59
AT1G19440.1	78.95	81.08
AT1G19485.1	70	73.68
AT1G19485.2	69.44	69.44
AT1G19520.1	100	100
AT1G19520.2	100	100
AT1G19530.1	100	100
AT1G19570.1	84.38	81.82
AT1G19570.2	84.38	81.82
AT1G19580.1	100	100
AT1G19580.2	100	100
AT1G19600.1	68.18	83.33
AT1G19660.1	100	100
AT1G19660.2	100	100
AT1G19670.1	100	100
AT1G19680.1	97.83	96.77
AT1G19700.1	46	47.92
AT1G19700.2	50.96	51.46
AT1G19700.3	100	100
AT1G19710.1	59.46	55
AT1G19715.1	100	100
AT1G19715.2	51.39	52.86
AT1G19715.3	100	100
AT1G19720.1	100	100
AT1G19730.1	100	100
AT1G19740.1	85.71	80
AT1G19770.1	66.67	57.14
AT1G19800.1	100	100
AT1G19800.2	49.45	49.45
AT1G19800.3	56.04	59.3
AT1G19835.1	54.9	51.85
AT1G19835.2	100	100
AT1G19870.1	71.74	73.33
AT1G19880.1	79.1	76.81
AT1G19910.1	94.74	100
AT1G19920.1	100	100
AT1G19950.1	83.05	83.05
AT1G19960.1	100	90
AT1G19990.1	71.88	65.71
AT1G20010.1	50	57.89
AT1G20020.1	11.54	9.09
AT1G20020.2	11.54	9.09
AT1G20020.3	11.54	9.09
AT1G20050.1	100	100
AT1G20090.1	84.85	84
AT1G20100.1	48.75	48.15
AT1G20100.2	48.75	48.15
AT1G20110.1	28.57	25
AT1G20140.1	100	100
AT1G20190.1	31.25	50
AT1G20200.1	91.67	91.67
AT1G20220.1	59.32	50
AT1G20225.1	NA	NA
AT1G20260.1	0	0
AT1G20270.1	100	100
AT1G20300.1	30.77	28.57
AT1G20330.1	53.57	60
AT1G20340.1	60	42.86
AT1G20370.1	41.67	41.67
AT1G20410.1	100	100
AT1G20430.1	NA	NA
AT1G20440.1	100	57.14
AT1G20450.1	100	100
AT1G20450.2	100	100
AT1G20460.1	0	0
AT1G20510.1	0	0
AT1G20510.2	NA	NA
AT1G20560.1	100	100
AT1G20560.2	37.23	36.84
AT1G20575.1	100	100
AT1G20580.1	0	0
AT1G20610.1	26.83	27.85
AT1G20620.1	100	100
AT1G20620.2	100	100
AT1G20620.4	80.33	79.67
AT1G20620.5	100	100
AT1G20630.1	80	81.63
AT1G20670.1	NA	NA
AT1G20693.1	100	100
AT1G20693.2	100	100
AT1G20693.3	100	100
AT1G20696.1	100	100
AT1G20696.2	60.71	62.96
AT1G20696.3	60.71	62.96
AT1G20760.1	56.82	56.82
AT1G20770.1	100	100
AT1G20780.1	37.5	42.35
AT1G20810.1	100	100
AT1G20816.1	100	100
AT1G20830.1	NA	NA
AT1G20840.1	89.66	83.87
AT1G20850.1	100	100
AT1G20920.1	80	76.6
AT1G20920.2	62.59	61.48
AT1G20930.1	0	0
AT1G20950.1	50	62.5
AT1G20960.1	73.77	71.43
AT1G20960.2	73.77	71.43
AT1G20970.1	100	100
AT1G20980.1	53.62	51.39
AT1G21080.1	68	59.65
AT1G21080.2	10.99	10.1
AT1G21080.3	62.71	64.35
AT1G21100.1	57.69	57.69
AT1G21110.1	50	50
AT1G21120.1	67.74	58.33
AT1G21130.1	65.62	65.62
AT1G21130.2	65.62	65.62
AT1G21160.1	100	100
AT1G21190.1	80	80
AT1G21200.1	100	100
AT1G21210.1	81.31	80.56
AT1G21250.1	0	0
AT1G21270.1	0	0
AT1G21310.1	NA	NA
AT1G21350.1	55.71	56.12
AT1G21350.2	100	100
AT1G21350.3	100	100
AT1G21370.1	65.45	66.06
AT1G21370.2	71.76	76.25
AT1G21380.1	12.05	11.9
AT1G21390.1	100	100
AT1G21400.1	100	85.71
AT1G21440.1	61.11	61.11
AT1G21450.1	71.64	75
AT1G21500.1	100	100
AT1G21560.1	100	100
AT1G21560.2	62.3	59.38
AT1G21560.3	100	96.2
AT1G21580.1	32.56	32.56
AT1G21590.1	78.08	79.17
AT1G21600.1	100	95
AT1G21600.2	100	95
AT1G21610.1	57.69	61.22
AT1G21610.2	57.69	61.22
AT1G21610.3	94.74	100
AT1G21630.1	94.79	94.79
AT1G21630.2	95.73	96.55
AT1G21640.1	100	100
AT1G21640.2	78.65	77.78
AT1G21650.2	100	100
AT1G21650.3	72.73	61.54
AT1G21660.1	83.56	81.33
AT1G21670.1	NA	NA
AT1G21680.1	100	100
AT1G21690.1	100	100
AT1G21690.2	NA	NA
AT1G21690.3	0	0
AT1G21690.4	NA	NA
AT1G21700.1	100	100
AT1G21720.1	47.06	44.44
AT1G21750.1	0	0
AT1G21750.2	0	0
AT1G21760.1	100	89.74
AT1G21770.1	100	100
AT1G21780.1	67.23	69.57
AT1G21780.2	51.04	48.76
AT1G21790.1	92.86	94.55
AT1G21830.1	70	77.78
AT1G21880.1	33.93	33.33
AT1G21880.2	33.93	33.33
AT1G21900.1	100	100
AT1G21910.1	41.67	38.46
AT1G21920.1	100	100
AT1G21930.1	100	100
AT1G21980.1	14.68	14.41
AT1G22060.1	87.1	86.17
AT1G22070.1	100	100
AT1G22140.1	33.33	33.33
AT1G22160.1	100	100
AT1G22190.1	48.59	49.29
AT1G22200.1	93.55	93.55
AT1G22200.2	93.55	93.55
AT1G22230.1	100	100
AT1G22250.1	100	100
AT1G22270.1	100	100
AT1G22280.1	98.48	97.01
AT1G22280.2	98.48	97.01
AT1G22280.3	82.95	81.11
AT1G22300.1	34.78	32
AT1G22300.2	84	84
AT1G22300.3	34.78	32
AT1G22310.1	100	97.59
AT1G22310.2	100	100
AT1G22330.1	29.63	32
AT1G22360.1	35.71	50
AT1G22360.2	35.71	50
AT1G22370.1	21.21	20.29
AT1G22400.1	33.33	28.57
AT1G22410.1	100	88.89
AT1G22430.1	47.83	42.31
AT1G22430.2	76.92	76.92
AT1G22450.1	64.76	66.02
AT1G22520.1	50	55
AT1G22520.2	50	55
AT1G22530.1	56.25	56.25
AT1G22590.1	100	100
AT1G22610.1	57.14	51.61
AT1G22620.1	97.87	95.83
AT1G22630.1	69.05	64.44
AT1G22690.1	NA	0
AT1G22690.2	NA	0
AT1G22690.3	NA	0
AT1G22700.1	100	100
AT1G22700.2	100	100
AT1G22700.3	61.9	62.5
AT1G22710.1	28.57	27.27
AT1G22730.1	100	98.48
AT1G22740.1	62.16	63.89
AT1G22780.1	44.74	47.22
AT1G22790.1	20.99	19.54
AT1G22790.2	67.95	68.42
AT1G22800.1	55	52.38
AT1G22840.1	100	100
AT1G22840.2	100	100
AT1G22850.1	100	100
AT1G22882.1	47.62	50
AT1G22885.1	60	60
AT1G22885.2	100	100
AT1G22890.1	100	100
AT1G22910.1	19.35	20.34
AT1G22910.3	19.35	20.34
AT1G22930.1	75	72.41
AT1G22930.2	98.65	100
AT1G22940.1	100	100
AT1G22950.1	100	100
AT1G23030.1	77.78	70
AT1G23080.1	82.76	88.89
AT1G23080.2	75.86	88
AT1G23080.3	82.76	88.89
AT1G23090.1	8.7	9.52
AT1G23130.1	100	100
AT1G23190.1	100	100
AT1G23205.1	40	28.57
AT1G23220.1	100	100
AT1G23260.1	100	100
AT1G23280.1	100	100
AT1G23290.1	100	100
AT1G23310.1	68.22	70.19
AT1G23310.2	68.22	70.19
AT1G23360.1	100	100
AT1G23360.2	80	81.63
AT1G23360.3	40.6	40.6
AT1G23390.1	NA	NA
AT1G23410.1	80	100
AT1G23440.1	75	66.67
AT1G23490.1	22.22	21.62
AT1G23710.1	51.61	50
AT1G23740.1	38.1	40
AT1G23750.1	100	94.59
AT1G23820.1	NA	NA
AT1G23820.2	NA	NA
AT1G23860.1	100	100
AT1G23860.2	100	100
AT1G23860.3	28.57	32.26
AT1G23860.4	94.94	94.94
AT1G23870.1	100	100
AT1G23900.1	36.11	34.21
AT1G23900.2	85.71	92.31
AT1G23950.1	100	84.62
AT1G23950.2	100	84.62
AT1G23950.3	100	84.62
AT1G23950.4	100	84.62
AT1G23950.5	100	84.62
AT1G23960.1	100	100
AT1G23960.2	100	100
AT1G23970.1	40	40
AT1G23970.2	40	40
AT1G24020.1	0	0
AT1G24020.2	100	100
AT1G24040.1	25	25
AT1G24050.1	0	0
AT1G24100.1	53.85	58.33
AT1G24120.1	19.28	17.39
AT1G24147.1	100	100
AT1G24160.1	74	75.51
AT1G24160.2	93.23	94.66
AT1G24170.1	100	100
AT1G24180.1	100	100
AT1G24190.1	97.3	97.3
AT1G24190.2	97.3	97.3
AT1G24240.1	34.78	38.1
AT1G24267.1	92.45	94.23
AT1G24267.2	92.45	94.23
AT1G24310.1	79.41	79.41
AT1G24340.1	35.19	32.2
AT1G24350.1	90.74	90.74
AT1G24350.2	90.74	90.74
AT1G24360.1	0	0
AT1G24450.1	100	100
AT1G24460.2	30.16	32.76
AT1G24490.1	100	100
AT1G24490.2	100	100
AT1G24510.1	33.33	34.38
AT1G24510.2	92.22	92.22
AT1G24560.1	77.78	80.77
AT1G24575.1	100	100
AT1G24610.1	100	100
AT1G24625.1	30	30.51
AT1G24706.1	84.78	86.67
AT1G24706.2	84.78	86.67
AT1G24764.1	73.08	73.08
AT1G24793.1	100	100
AT1G24793.2	100	100
AT1G24800.1	77.27	73.91
AT1G24880.1	23.08	25
AT1G24880.2	23.08	25
AT1G24880.3	23.08	25
AT1G24881.1	77.27	73.91
AT1G25054.1	0	0
AT1G25054.2	10.61	10.45
AT1G25055.1	100	100
AT1G25150.1	100	50
AT1G25211.1	100	50
AT1G25220.1	100	100
AT1G25220.2	100	100
AT1G25230.1	100	100
AT1G25260.1	80	85.71
AT1G25275.1	33.33	100
AT1G25275.2	100	100
AT1G25275.3	100	100
AT1G25280.1	95.83	95.83
AT1G25280.2	84.81	85.52
AT1G25280.3	47.14	45.59
AT1G25350.1	100	100
AT1G25350.2	100	100
AT1G25370.1	35	42.42
AT1G25380.1	21.79	22.67
AT1G25390.1	100	100
AT1G25400.1	57.14	57.14
AT1G25400.2	0	0
AT1G25420.1	90	100
AT1G25420.2	39.07	38.93
AT1G25420.3	63.37	60.95
AT1G25440.1	42	43.75
AT1G25450.1	0	0
AT1G25490.1	92.11	94.59
AT1G25520.1	49.21	51.67
AT1G25540.1	98.41	98.41
AT1G25540.2	36.05	37.58
AT1G25550.1	38	40
AT1G25560.1	0	0
AT1G25570.1	100	100
AT1G25580.1	30.43	31.34
AT1G25682.1	100	100
AT1G26090.1	100	100
AT1G26110.1	31.94	31.08
AT1G26110.2	59.72	58.9
AT1G26150.1	5.38	5.34
AT1G26160.1	100	100
AT1G26180.1	71.43	68.18
AT1G26210.1	80	78.69
AT1G26220.1	NA	NA
AT1G26230.1	100	100
AT1G26230.2	97.7	99.42
AT1G26260.1	100	100
AT1G26260.2	5.56	5.71
AT1G26270.1	96.21	100
AT1G26290.1	100	100
AT1G26340.1	100	100
AT1G26440.1	56	48.28
AT1G26440.2	92.78	94.74
AT1G26440.3	56	48.28
AT1G26440.4	56	48.28
AT1G26450.1	100	100
AT1G26460.1	0	0
AT1G26470.1	100	100
AT1G26520.1	68.13	69.66
AT1G26550.1	100	100
AT1G26580.1	84.62	85.67
AT1G26620.1	37.21	38.4
AT1G26630.1	12.5	11.11
AT1G26630.2	12.5	11.11
AT1G26640.1	93.1	100
AT1G26660.1	0	0
AT1G26660.2	0	0
AT1G26665.1	84.62	84.62
AT1G26665.2	84.62	84.62
AT1G26670.1	16.07	14.29
AT1G26690.1	0	0
AT1G26740.1	50	42.86
AT1G26750.1	47.06	53.33
AT1G26761.1	100	90.91
AT1G26770.1	100	100
AT1G26770.2	100	100
AT1G26800.1	100	100
AT1G26830.1	67.39	81.58
AT1G26850.1	92.98	92.98
AT1G26850.2	95.83	95.83
AT1G26850.3	92.98	92.98
AT1G26880.1	0	0
AT1G26880.2	0	0
AT1G26910.1	28.57	33.33
AT1G26920.1	0	0
AT1G26930.1	100	100
AT1G26940.1	100	100
AT1G27000.1	97.56	100
AT1G27020.1	70.59	75
AT1G27030.1	100	100
AT1G27050.1	100	100
AT1G27090.1	37.93	35.48
AT1G27100.1	43.48	55.56
AT1G27130.1	40.91	52.94
AT1G27150.1	72.5	70.73
AT1G27190.1	86.96	86.96
AT1G27210.1	25	20.83
AT1G27290.1	100	100
AT1G27290.2	100	100
AT1G27300.1	95.35	95.35
AT1G27310.1	86.67	86.67
AT1G27330.1	84.21	84.21
AT1G27340.1	56.72	56.72
AT1G27350.1	62.5	60.61
AT1G27385.1	66.67	33.33
AT1G27385.2	66.67	33.33
AT1G27390.1	26.92	35
AT1G27400.1	100	100
AT1G27435.1	33.33	33.33
AT1G27450.1	100	100
AT1G27450.2	50	52.38
AT1G27450.3	100	100
AT1G27460.1	63.33	64.77
AT1G27470.1	100	100
AT1G27480.1	7.14	7.69
AT1G27510.1	44.44	44.44
AT1G27520.1	100	100
AT1G27530.1	100	100
AT1G27540.1	100	100
AT1G27540.2	100	100
AT1G27565.1	25	21.21
AT1G27600.1	17.39	15.58
AT1G27600.2	17.39	15.58
AT1G27630.1	50.77	51.56
AT1G27650.1	34.88	35.71
AT1G27650.2	83.33	69.44
AT1G27680.1	96.04	96.04
AT1G27695.1	100	100
AT1G27695.2	100	100
AT1G27700.1	100	100
AT1G27730.1	47.06	40
AT1G27752.1	28.95	28.21
AT1G27752.2	67.92	67.79
AT1G27760.1	51.56	50
AT1G27760.2	89.13	91.11
AT1G27760.3	87.5	86.15
AT1G27770.1	40.91	41.86
AT1G27770.2	40.91	41.86
AT1G27840.1	75	75
AT1G27840.2	51.72	53.57
AT1G27840.3	51.72	53.57
AT1G27850.1	35.85	38.38
AT1G27930.1	85.37	83.33
AT1G27950.1	100	100
AT1G27970.1	0	0
AT1G27970.2	0	0
AT1G27980.1	100	100
AT1G28050.1	72.09	68.89
AT1G28060.1	100	100
AT1G28090.1	100	100
AT1G28090.2	100	100
AT1G28090.3	100	100
AT1G28120.1	100	98.25
AT1G28140.1	0	0
AT1G28150.1	100	100
AT1G28190.1	56.25	50
AT1G28200.1	100	100
AT1G28240.1	61.54	63.31
AT1G28280.1	0	0
AT1G28280.2	0	0
AT1G28290.1	19.35	18.18
AT1G28290.2	NA	NA
AT1G28320.1	45.95	44.74
AT1G28330.1	100	100
AT1G28330.2	0	0
AT1G28330.3	0	0
AT1G28330.4	0	0
AT1G28330.5	30	50
AT1G28350.1	62.5	65.22
AT1G28370.1	100	95.24
AT1G28380.1	20	23.08
AT1G28390.1	100	100
AT1G28395.1	25	40
AT1G28395.2	0	NA
AT1G28395.3	25	40
AT1G28395.4	25	40
AT1G28395.5	95.52	100
AT1G28400.1	100	100
AT1G28420.1	100	100
AT1G28440.1	100	100
AT1G28480.1	100	100
AT1G28490.1	62.5	54.35
AT1G28490.2	89.09	83.05
AT1G28510.1	100	100
AT1G28520.1	100	100
AT1G28520.2	100	100
AT1G28540.1	0	0
AT1G28580.1	100	100
AT1G28580.2	96.59	96.59
AT1G28600.1	100	83.33
AT1G28600.2	100	83.33
AT1G28610.2	100	100
AT1G28960.2	62.5	62.5
AT1G28960.3	62.5	62.5
AT1G28960.4	62.5	62.5
AT1G28960.5	62.5	62.5
AT1G29030.1	0	0
AT1G29040.1	100	100
AT1G29040.2	100	100
AT1G29040.3	100	100
AT1G29040.4	100	100
AT1G29060.1	100	100
AT1G29070.1	100	100
AT1G29150.1	100	100
AT1G29220.1	100	100
AT1G29220.2	100	100
AT1G29250.1	100	100
AT1G29260.1	59.38	61.29
AT1G29310.1	82.14	85.19
AT1G29320.1	100	100
AT1G29340.1	0	0
AT1G29350.1	92.86	92.86
AT1G29370.1	92.86	92.86
AT1G29390.1	NA	NA
AT1G29390.2	100	100
AT1G29395.1	100	100
AT1G29400.1	60	60
AT1G29400.2	100	100
AT1G29470.1	24	25
AT1G29470.2	100	100
AT1G29530.1	29.17	29.17
AT1G29560.1	46.48	47.14
AT1G29560.2	51.54	51.32
AT1G29660.1	80	71.43
AT1G29670.1	100	94.44
AT1G29700.1	78.95	100
AT1G29750.2	100	100
AT1G29790.1	100	100
AT1G29810.1	100	100
AT1G29820.1	87.5	87.5
AT1G29820.2	100	97.78
AT1G29850.1	96.88	96.88
AT1G29850.2	96.88	96.88
AT1G29850.3	96.88	96.88
AT1G29880.1	100	100
AT1G29890.1	91.22	89.4
AT1G29890.2	100	100
AT1G29900.1	85.19	85.19
AT1G29910.1	33.33	50
AT1G29920.1	100	100
AT1G29930.1	100	100
AT1G29940.1	100	92.31
AT1G29950.1	68.63	69.5
AT1G29950.2	50.14	50.42
AT1G29951.1	82.11	81.68
AT1G29952.1	100	98.66
AT1G29965.1	0	0
AT1G29970.1	85.37	87.5
AT1G29970.2	64.86	63.16
AT1G29980.1	100	100
AT1G29990.1	10	11.11
AT1G30000.1	60	51.06
AT1G30070.1	100	100
AT1G30070.2	100	100
AT1G30090.1	42.42	40.58
AT1G30110.1	97.67	100
AT1G30110.2	100	100
AT1G30120.1	100	100
AT1G30130.1	100	100
AT1G30130.2	100	100
AT1G30200.1	100	100
AT1G30200.2	100	100
AT1G30210.1	57.14	52.89
AT1G30210.2	42.7	43.68
AT1G30230.1	77.27	73.91
AT1G30230.2	77.27	73.91
AT1G30250.1	NA	NA
AT1G30260.1	100	100
AT1G30270.1	29.51	27.48
AT1G30280.1	100	100
AT1G30320.1	54.84	54.84
AT1G30330.1	52.24	51.85
AT1G30330.2	45.89	43.27
AT1G30360.1	51.67	50
AT1G30380.1	0	0
AT1G30400.1	0	0
AT1G30400.2	100	100
AT1G30410.1	31.25	31.65
AT1G30460.1	100	100
AT1G30470.1	100	100
AT1G30470.2	58.57	65.08
AT1G30470.3	5.88	6.35
AT1G30480.1	46.74	46.74
AT1G30490.1	41.67	46.3
AT1G30510.1	72.13	68.75
AT1G30510.2	70.18	66.67
AT1G30510.3	40	42.11
AT1G30530.1	100	100
AT1G30580.1	100	100
AT1G30610.2	100	100
AT1G30630.1	73.08	76
AT1G30640.1	61.54	65.75
AT1G30680.1	100	100
AT1G30690.1	100	100
AT1G30690.2	36.92	35.29
AT1G30810.1	100	96.63
AT1G30810.2	100	100
AT1G30820.1	70.65	69.89
AT1G30880.1	100	100
AT1G30910.1	100	100
AT1G30960.1	0	0
AT1G30970.1	34.69	38.64
AT1G30970.2	68.89	72.09
AT1G31070.1	0	0
AT1G31070.2	76.92	66.67
AT1G31130.1	22.06	23.81
AT1G31160.1	0	0
AT1G31170.1	0	0
AT1G31170.2	0	0
AT1G31170.3	0	0
AT1G31170.4	48.72	51.43
AT1G31180.1	NA	NA
AT1G31190.1	50	38.89
AT1G31230.1	88.57	79.49
AT1G31280.1	0	0
AT1G31310.1	100	100
AT1G31330.1	13.33	16.67
AT1G31340.1	100	100
AT1G31350.1	100	100
AT1G31360.1	20.83	19.23
AT1G31360.2	75.18	74.64
AT1G31410.1	100	100
AT1G31420.1	59.3	60.71
AT1G31420.2	48.45	50.54
AT1G31440.1	74.24	75.38
AT1G31540.2	100	100
AT1G31580.1	64.29	56.25
AT1G31600.1	56.67	55.19
AT1G31600.2	45.83	43.14
AT1G31600.3	75.56	72.34
AT1G31650.1	60.58	61.76
AT1G31660.1	100	100
AT1G31730.1	42.31	45.21
AT1G31780.1	34.78	30.77
AT1G31800.1	100	100
AT1G31810.1	32.76	34.55
AT1G31812.1	20	22.22
AT1G31817.1	0	0
AT1G31850.1	43.24	44.44
AT1G31850.2	100	100
AT1G31850.3	100	100
AT1G31860.1	29.41	27.78
AT1G31870.1	97.67	100
AT1G31870.2	17.02	17.39
AT1G31910.1	67.44	68.4
AT1G31910.2	67.44	68.4
AT1G31920.1	68	59.65
AT1G31930.1	89.8	91.67
AT1G31930.2	93.1	90
AT1G31930.3	100	100
AT1G31940.1	64.29	68.52
AT1G31970.1	100	100
AT1G32050.1	76.79	82.69
AT1G32060.1	96.67	100
AT1G32070.1	NA	NA
AT1G32070.2	100	100
AT1G32070.3	NA	0
AT1G32080.1	100	100
AT1G32100.1	0	0
AT1G32130.1	100	100
AT1G32130.2	96.97	100
AT1G32160.1	100	100
AT1G32170.1	100	100
AT1G32200.1	80	80
AT1G32200.2	80	80
AT1G32210.1	100	100
AT1G32220.1	69.09	67.86
AT1G32230.1	76.43	76.92
AT1G32230.2	76.43	76.92
AT1G32230.3	80.25	82.35
AT1G32240.1	86.76	95.16
AT1G32260.1	60	60
AT1G32310.1	94.12	94.12
AT1G32340.1	100	100
AT1G32360.1	21.05	20.51
AT1G32400.1	70.97	73.33
AT1G32400.2	71.9	73.11
AT1G32400.3	100	100
AT1G32410.1	93.33	90.32
AT1G32410.2	100	97.44
AT1G32410.3	79.07	79.07
AT1G32410.4	100	97.37
AT1G32410.5	69.7	65.71
AT1G32440.1	100	100
AT1G32460.1	98.21	98.21
AT1G32470.1	100	100
AT1G32490.1	28.57	29.09
AT1G32490.2	86.44	85
AT1G32500.1	100	100
AT1G32530.1	100	89.47
AT1G32550.1	100	100
AT1G32580.1	77.78	58.33
AT1G32630.1	44.44	40.68
AT1G32640.1	38.46	31.25
AT1G32700.1	40	37.84
AT1G32700.2	87.58	87.01
AT1G32750.1	37.18	37.18
AT1G32790.1	57.78	56.52
AT1G32790.2	82.22	84.09
AT1G32870.1	100	100
AT1G32870.2	100	100
AT1G32920.1	100	100
AT1G32990.1	100	100
AT1G33040.1	100	100
AT1G33050.1	91.03	89.87
AT1G33050.2	78.21	78.21
AT1G33050.3	78.21	78.21
AT1G33050.4	91.03	89.87
AT1G33060.2	100	100
AT1G33110.1	54.29	52.78
AT1G33120.1	100	100
AT1G33140.1	100	100
AT1G33170.1	100	100
AT1G33230.1	94.83	96.49
AT1G33240.1	88.41	92.42
AT1G33250.1	97.22	97.22
AT1G33265.1	0	0
AT1G33290.1	100	100
AT1G33290.2	NA	NA
AT1G33360.1	84.31	72.88
AT1G33390.1	51.61	59.26
AT1G33470.1	0	0
AT1G33470.2	0	0
AT1G33490.1	52.63	54.05
AT1G33520.1	100	100
AT1G33590.1	NA	NA
AT1G33680.1	64	59.26
AT1G33700.1	4.35	5
AT1G33700.2	100	100
AT1G33780.1	83.33	83.33
AT1G33810.1	100	100
AT1G33811.1	0	0
AT1G33970.1	100	100
AT1G33970.2	100	100
AT1G33970.3	0	0
AT1G33970.4	0	0
AT1G33970.5	100	100
AT1G33980.1	37.5	33.33
AT1G33980.2	37.5	33.33
AT1G33990.1	80.85	81.72
AT1G34000.1	0	0
AT1G34010.1	92.31	92.31
AT1G34020.1	12.68	12.68
AT1G34030.1	60	69.23
AT1G34130.1	70.37	67.86
AT1G34190.1	82.35	76.92
AT1G34220.1	100	100
AT1G34220.2	92.45	89.09
[truncated: 12,859 more rows]

## Sheet: F3
F3 Shoot Control vs. Shoot Salt PPV, CDS
transcript	sensitivity	PPV
AT1G01020.1	0	0
AT1G01020.2	30.94	31.46
AT1G01030.1	27.33	26.91
AT1G01050.1	45.5	45.73
AT1G01080.1	71.33	71.58
AT1G01080.2	62.9	64.26
AT1G01090.1	77.67	76.74
AT1G01100.1	48.7	47.46
AT1G01100.2	48.7	47.46
AT1G01100.3	90.11	86.32
AT1G01100.4	48.7	47.46
AT1G01120.1	44.75	46.18
AT1G01130.1	21.19	21.01
AT1G01140.1	68.87	69.86
AT1G01140.2	47.64	47.98
AT1G01140.3	42.39	42.99
AT1G01160.1	55.83	54.82
AT1G01160.2	60.85	61.43
AT1G01170.1	98.65	97.33
AT1G01170.2	97.4	100
AT1G01210.1	100	100
AT1G01220.1	41.29	41.37
AT1G01230.1	55.48	53.64
AT1G01240.1	44.41	42.81
AT1G01240.2	44.41	42.81
AT1G01240.3	44.86	42.81
AT1G01290.1	44.49	43.63
AT1G01290.2	38.15	36.82
AT1G01300.1	50.35	51.68
AT1G01350.1	52.02	52.34
AT1G01360.1	51.1	53.14
AT1G01430.1	56.08	55.26
AT1G01440.1	42.48	43.76
AT1G01470.1	84.56	81.56
AT1G01490.1	93.28	91.91
AT1G01490.2	93.28	91.91
AT1G01500.1	23.32	22.46
AT1G01510.1	58.53	59
AT1G01540.1	38.28	37.4
AT1G01540.2	73.94	74.26
AT1G01550.1	61.59	60.3
AT1G01550.2	61.77	61.59
AT1G01610.1	13.65	13.11
AT1G01620.1	57.46	56
AT1G01620.2	81.54	79.9
AT1G01630.1	52.79	53.48
AT1G01710.1	33.74	33.5
AT1G01730.1	57.28	57.55
AT1G01770.1	58.93	58.74
AT1G01780.1	31.52	30.05
AT1G01790.1	78.19	77.86
AT1G01800.1	74.92	72.46
AT1G01800.2	80.78	79.23
AT1G01820.1	17.05	17.05
AT1G01830.1	52.2	52.1
AT1G01830.2	52.2	52.1
AT1G01830.3	52.2	52.1
AT1G01840.1	43.36	40.52
AT1G01860.1	75.36	75.58
AT1G01910.1	24.78	24.43
AT1G01910.2	54.97	54.65
AT1G01910.3	45.03	44.74
AT1G01910.4	29.48	28.98
AT1G01910.5	73.68	74.29
AT1G01920.2	29.49	30.26
AT1G01930.1	58.91	57.79
AT1G01940.1	46.21	46.53
AT1G01950.1	29.34	29.75
AT1G01950.2	27.47	28.06
AT1G01950.3	33.33	33.94
AT1G01970.1	42.67	42.24
AT1G01990.1	41.1	41.67
AT1G02000.1	70.46	70.29
AT1G02020.1	25.21	25.04
AT1G02020.2	52.77	52.13
AT1G02050.1	39.69	40.53
AT1G02090.1	59.11	59.84
AT1G02090.2	72.04	73.43
AT1G02090.3	76.86	78.22
AT1G02100.1	59.82	61.32
AT1G02100.2	21.26	21.48
AT1G02100.3	39.82	41.19
AT1G02110.1	41.12	41.25
AT1G02120.1	47.42	47.59
AT1G02130.1	57.44	58.03
AT1G02140.1	53.33	51.43
AT1G02145.1	65.76	66.18
AT1G02145.2	23.34	22.42
AT1G02145.3	45.24	44.86
AT1G02145.4	53.83	53.21
AT1G02150.1	30.78	31.27
AT1G02160.1	65.08	67.21
AT1G02160.2	100	100
AT1G02170.1	35.29	36.14
AT1G02205.1	45.32	44.89
AT1G02205.2	33.1	33.16
AT1G02205.3	40.2	41.25
AT1G02270.1	30.44	30.44
AT1G02280.1	44.17	42.09
AT1G02280.2	44.17	42.09
AT1G02300.1	63.37	63.88
AT1G02305.1	52.69	52.25
AT1G02330.1	38.63	37.82
AT1G02335.1	58.42	59.6
AT1G02410.1	73.33	74.11
AT1G02450.1	93.28	94.87
AT1G02475.1	65.28	65.28
AT1G02500.1	35.87	35.87
AT1G02500.2	34.77	34.77
AT1G02560.1	58.3	59.78
AT1G02610.1	31.88	33
AT1G02660.1	41.03	39.97
AT1G02680.1	18.64	20
AT1G02730.1	65.65	64.76
AT1G02750.1	42.61	44.14
AT1G02750.2	38.25	41.5
AT1G02780.1	57.79	56.93
AT1G02840.1	63.45	63.01
AT1G02840.2	62.95	63.18
AT1G02840.3	63.45	63.01
AT1G02860.1	58.63	58.28
AT1G02870.1	52.73	50.58
AT1G02880.3	26.59	27.92
AT1G02880.4	28.31	27.98
AT1G02890.1	44.33	44.07
AT1G02890.2	54.25	54.03
AT1G02910.1	43.89	45.75
AT1G02920.1	31.44	32.11
AT1G02930.1	36.79	35.32
AT1G02930.2	37.17	35.32
AT1G02960.1	31.95	31.95
AT1G02960.2	37.78	37.7
AT1G02960.3	61.62	60.55
AT1G02990.1	42.17	41.92
AT1G02990.2	41.87	42.08
AT1G02990.3	32.75	32.21
AT1G03030.1	56.6	57.19
AT1G03040.1	68.6	68.84
AT1G03040.2	63.51	64.64
AT1G03090.1	33.96	34.1
AT1G03090.2	35.35	35.3
AT1G03130.1	19.3	18.97
AT1G03140.1	39.71	39.13
AT1G03150.1	58.49	56.71
AT1G03160.1	31.67	32.46
AT1G03160.2	33.02	33.11
AT1G03220.1	64.2	63.73
AT1G03230.1	64.44	65.25
AT1G03250.1	40.77	39.92
AT1G03250.2	55.08	54.85
AT1G03280.1	39.68	39.33
AT1G03290.1	45.9	44.81
AT1G03290.2	45.9	44.81
AT1G03300.1	25.99	25.19
AT1G03330.1	68.13	68.13
AT1G03350.1	45.75	47.62
AT1G03360.1	59.06	58.7
AT1G03365.1	44.55	45.07
AT1G03370.1	34.99	35.83
AT1G03380.1	53.57	53.98
AT1G03400.1	49.09	49.39
AT1G03410.1	38.7	39.21
AT1G03430.1	55.92	54.49
AT1G03470.1	55.95	55.08
AT1G03470.2	55.29	55.08
AT1G03475.1	65.74	63.96
AT1G03530.1	39.65	39.38
AT1G03560.1	53.3	53.13
AT1G03590.1	33.55	34.39
AT1G03600.1	35.53	34.39
AT1G03610.1	66.67	63.23
AT1G03630.1	37.4	38.63
AT1G03630.2	33.51	33.78
AT1G03680.1	56.55	56.21
AT1G03740.1	36.39	37.55
AT1G03740.2	34.04	34.84
AT1G03760.1	37.64	36.81
AT1G03770.1	46.3	46.84
AT1G03780.1	48.63	48.55
AT1G03780.2	36.03	36.24
AT1G03780.3	55.03	55.81
AT1G03820.1	57.28	56.73
AT1G03830.1	61.52	62.99
AT1G03830.2	66.25	66.74
AT1G03860.1	43.87	44.36
AT1G03860.2	41	42.49
AT1G03860.3	43.87	44.36
AT1G03870.1	44.35	46.79
AT1G03900.1	59	59.92
AT1G03910.1	40.93	41
AT1G03910.2	49.02	47.72
AT1G03930.1	41.77	41.51
AT1G03950.1	30.27	30.77
AT1G03970.1	14.06	14.46
AT1G04040.1	52.36	53.63
AT1G04070.1	63.53	57.45
AT1G04080.1	32.31	32.57
AT1G04080.2	38.17	37.7
AT1G04080.3	45.4	44.94
AT1G04120.1	67.08	67.91
AT1G04140.1	72.33	71.68
AT1G04140.2	76.67	75.98
AT1G04170.1	40.27	40.55
AT1G04190.1	53.55	54.07
AT1G04200.1	53.48	53.78
AT1G04230.1	26.83	26.37
AT1G04240.1	23.6	24.14
AT1G04250.1	39.11	39.46
AT1G04260.1	10.53	10.91
AT1G04270.1	19.15	19.15
AT1G04270.2	25.53	26.09
AT1G04280.1	23.26	23.78
AT1G04290.1	61.84	62.67
AT1G04300.1	60.26	60.74
AT1G04300.2	45.26	45.36
AT1G04300.3	39.8	39.53
AT1G04300.4	41.49	42
AT1G04340.1	73.91	74.38
AT1G04350.1	67.24	66.11
AT1G04400.1	56.67	57.92
AT1G04400.2	56.67	57.92
AT1G04410.1	50.31	50.15
AT1G04420.1	47.64	48
AT1G04430.1	35.76	35.19
AT1G04430.2	41.86	40.92
AT1G04440.1	30.39	29.71
AT1G04480.1	76.98	78.1
AT1G04510.1	60.79	61.92
AT1G04510.2	60.87	62
AT1G04520.1	44.59	44.59
AT1G04530.1	27.93	27.74
AT1G04550.1	74.4	74.85
AT1G04550.2	48.1	49.14
AT1G04590.1	33.62	32.78
AT1G04590.2	28.97	29.05
AT1G04620.1	66.74	65.45
AT1G04630.1	46.48	49.25
AT1G04635.1	89.04	87.25
AT1G04640.1	56.33	55.36
AT1G04640.2	56.14	55.41
AT1G04680.1	54.77	54.24
AT1G04690.1	92.9	91.21
AT1G04710.1	73.61	73.55
AT1G04750.1	40.2	38.28
AT1G04750.2	15.34	16.07
AT1G04770.1	43.45	44.06
AT1G04780.1	49.05	48.74
AT1G04790.1	31.53	30.9
AT1G04800.1	16.86	17.37
AT1G04810.1	44.19	43.22
AT1G04820.1	91.67	91.27
AT1G04830.1	61.95	60.54
AT1G04850.1	94.9	93.06
AT1G04860.1	60.97	60.59
AT1G04870.1	75.54	75.27
AT1G04870.2	46.97	46.97
AT1G04900.1	29.76	29
AT1G04910.1	47.42	47.14
AT1G04940.1	46.79	48.63
AT1G04950.1	50	49.33
AT1G04950.2	50	49.33
AT1G04950.3	50	49.33
AT1G04960.1	45.45	45.61
AT1G04960.2	42.54	42.41
AT1G04980.1	31.91	33.33
AT1G04985.1	61.85	61.14
AT1G04990.2	29.32	28.28
AT1G05010.1	81.64	82.18
AT1G05060.1	26.07	24.9
AT1G05070.1	53.14	54.39
AT1G05120.1	56.51	55.46
AT1G05140.1	53.47	53.6
AT1G05150.1	31.52	31.91
AT1G05180.1	40.8	40.99
AT1G05180.2	71.36	72.62
AT1G05180.3	80.52	81.04
AT1G05190.1	58.29	56.86
AT1G05205.1	26.51	27.5
AT1G05270.1	44.82	45.07
AT1G05320.1	50.28	50
AT1G05320.2	50.28	50
AT1G05320.3	50.28	50
AT1G05350.1	51.71	52.09
AT1G05380.1	26.59	26.86
AT1G05380.2	26.59	26.86
AT1G05385.1	29.73	29.26
AT1G05410.1	57.02	58.04
AT1G05410.2	48.55	47.41
AT1G05430.1	26.24	26.44
AT1G05460.1	26.5	27.28
AT1G05500.1	61.09	60.76
AT1G05560.1	83.51	83.88
AT1G05590.1	49.56	48.95
AT1G05630.1	38.93	39.2
AT1G05630.2	34.88	34.82
AT1G05720.1	51.3	52.67
AT1G05780.1	80	76.77
AT1G05790.1	65.95	66.62
AT1G05790.2	72.16	71.18
AT1G05805.1	58.59	59.87
AT1G05810.1	61.9	62.9
AT1G05830.1	34.72	33.96
AT1G05830.2	34.75	33.96
AT1G05840.1	38.38	38.62
AT1G05850.1	81	83.51
AT1G05870.1	55.43	57.95
AT1G05870.2	55.43	57.95
AT1G05870.3	55.43	57.95
AT1G05870.4	55.43	57.95
AT1G05890.1	69.39	69
AT1G05890.2	64.18	62.63
AT1G05910.1	70.87	70.81
AT1G05940.1	66.29	65.2
AT1G05960.1	53.88	53.11
AT1G05960.2	57.4	58.04
AT1G06010.1	56.25	58.06
AT1G06040.1	50.66	48.94
AT1G06040.2	38.51	38.75
AT1G06060.1	73.26	69.19
AT1G06070.1	63.59	63.59
AT1G06110.1	53.85	53.74
AT1G06130.1	38.01	38.12
AT1G06130.2	43.17	45.72
AT1G06149.1	100	100
AT1G06150.2	46.41	46.03
AT1G06190.1	57.42	56.18
AT1G06190.2	25.94	26.64
AT1G06200.1	73.44	72.68
AT1G06210.1	68.84	67.88
AT1G06210.2	29.45	29.24
AT1G06220.1	41.3	40.7
AT1G06220.2	46.12	45.79
AT1G06230.1	53.31	52.14
AT1G06230.2	53.31	52.14
AT1G06230.3	53.31	52.14
AT1G06290.1	50.38	49.03
AT1G06360.1	88.18	90
AT1G06380.1	57.92	58.4
AT1G06390.1	40.41	40.62
AT1G06390.2	41.45	41.78
AT1G06400.1	28.78	28.78
AT1G06410.1	44.37	44.91
AT1G06420.1	55.81	55.17
AT1G06420.2	56.64	57.86
AT1G06430.1	37.54	37.76
AT1G06460.1	58.23	57.54
AT1G06470.1	50	49.26
AT1G06470.2	50	49.26
AT1G06475.1	81.91	89.53
AT1G06500.1	92.74	94.26
AT1G06500.2	48.78	48
AT1G06500.3	92.74	94.26
AT1G06500.4	98.46	99.22
AT1G06510.1	88.26	87.27
AT1G06515.1	96.43	98.18
AT1G06515.2	98.18	98.18
AT1G06530.1	55.15	54.15
AT1G06550.1	30.05	30.29
AT1G06570.1	59.65	57.23
AT1G06570.2	62.28	60.34
AT1G06640.1	38	37.15
AT1G06640.2	60.13	58.79
AT1G06640.3	36.97	37.1
AT1G06645.1	32.28	31.73
AT1G06650.1	44.52	44.68
AT1G06650.2	14.24	14.29
AT1G06670.1	33.27	33.47
AT1G06680.1	33.06	33.75
AT1G06680.2	41.71	43.35
AT1G06690.1	76.69	76.76
AT1G06700.1	73.68	73.04
AT1G06700.2	76.32	76.32
AT1G06720.1	56.55	57.03
AT1G06760.1	44.63	44.44
AT1G06790.1	40.38	43.52
AT1G06820.1	42.17	43.99
AT1G06830.1	70.97	72.53
AT1G06850.1	56.7	56.12
AT1G06850.2	62.32	64.18
AT1G06890.1	48.68	47.28
AT1G06890.2	48.68	47.28
AT1G06890.3	67.44	64.99
AT1G06900.1	41.45	41.29
AT1G06910.1	40.56	39.57
AT1G06950.1	42.87	42.87
AT1G06960.1	72.3	75.12
AT1G06960.2	84.21	87.56
AT1G06960.3	64.32	65.75
AT1G07000.1	36.77	37.39
AT1G07010.1	57.14	56.25
AT1G07010.2	57.91	56.84
AT1G07010.3	73.4	73.59
AT1G07020.1	46.04	46.38
AT1G07030.1	42.46	42.33
AT1G07040.1	25.28	25.28
AT1G07050.1	46.78	46.75
AT1G07070.1	47.92	45.54
AT1G07080.1	64.4	63.39
AT1G07110.1	50.42	50.56
AT1G07135.1	79.31	80.56
AT1G07140.1	72.12	75.76
AT1G07170.1	84.11	89.11
AT1G07170.2	77.57	74.11
AT1G07170.3	99.05	99.05
AT1G07200.1	39.36	38.52
AT1G07210.1	56.2	54.84
AT1G07220.1	48.52	47.62
AT1G07230.1	54.22	53.47
AT1G07250.1	81.5	80.86
AT1G07280.1	28.57	28.95
AT1G07280.2	28.57	28.95
AT1G07280.3	28.57	28.95
AT1G07310.1	48.83	47.87
AT1G07320.1	60.79	62.5
AT1G07320.2	40.81	41.57
AT1G07320.3	35.27	35.14
AT1G07320.4	57.95	57.52
AT1G07350.1	37.63	37.23
AT1G07350.2	61.36	62.31
AT1G07360.1	42.19	42.59
AT1G07370.1	43.5	43.32
AT1G07400.1	91.28	91.28
AT1G07420.1	24.21	24.21
AT1G07420.2	29.38	28.44
AT1G07430.1	61.43	60.71
AT1G07440.1	30.97	32.06
AT1G07440.2	39.32	39.9
AT1G07470.1	28.95	29.38
AT1G07480.1	42.31	40.86
AT1G07480.2	42.6	41.03
AT1G07510.1	70.63	71.25
AT1G07530.1	36.47	36.86
AT1G07590.1	67.53	66.3
AT1G07600.1	100	100
AT1G07610.1	100	100
AT1G07615.1	35.04	35.04
AT1G07630.1	34.35	35.66
AT1G07640.1	32.32	33.2
AT1G07640.2	64.07	63
AT1G07640.3	65.25	65.03
AT1G07650.1	44.98	44.62
AT1G07650.2	50.56	50.61
AT1G07660.1	55.79	53.54
AT1G07660.2	62.34	57.83
AT1G07670.1	54.1	54.5
AT1G07700.1	28.5	29.1
AT1G07700.2	12.88	13.04
AT1G07700.3	47.52	46.15
AT1G07720.1	57.36	56.14
AT1G07770.1	100	100
AT1G07770.2	100	100
AT1G07780.1	58.33	57.71
AT1G07780.2	84.87	82.44
AT1G07780.3	58.18	57.35
AT1G07780.4	24.62	23.33
AT1G07780.5	58.48	58.06
AT1G07790.1	43.55	46.15
AT1G07810.1	37.85	37.57
AT1G07820.1	45.83	44.9
AT1G07820.2	45.83	44.9
AT1G07830.1	63.19	60.26
AT1G07840.1	50.54	50.54
AT1G07840.2	50.54	50.54
AT1G07840.3	70.59	71.15
AT1G07890.1	52.87	53.75
AT1G07890.2	49.38	49.58
AT1G07890.3	48.97	49.58
AT1G07890.4	48.97	49.58
AT1G07890.5	52.87	53.75
AT1G07890.6	50.83	51.69
AT1G07890.7	52.87	53.75
AT1G07890.8	49.38	49.58
AT1G07920.1	51.13	50.33
AT1G07930.1	39.86	38.98
AT1G07930.2	28.85	29.25
AT1G07940.1	44.71	45.11
AT1G07940.2	33.85	33.78
AT1G07950.1	48.37	50.68
AT1G07960.1	50.36	47.62
AT1G07960.2	73.13	73.13
AT1G07960.3	68.35	70.9
AT1G07980.1	26.79	26.95
AT1G07990.1	49.35	48.35
AT1G08000.1	49.48	50
AT1G08000.2	49.48	50
AT1G08010.1	79.51	79.3
AT1G08010.2	45.14	44.98
AT1G08030.1	62.14	62.92
AT1G08040.1	39.52	40.38
AT1G08040.2	31.77	31.17
AT1G08110.1	29.14	30.72
AT1G08110.2	45.71	47.59
AT1G08110.3	29.14	30.72
AT1G08110.4	43.97	43.22
AT1G08125.1	54.46	54.82
AT1G08125.2	43.51	44.22
AT1G08125.3	52.51	53.97
AT1G08130.1	28.78	28.63
AT1G08160.1	47.87	46.88
AT1G08180.1	97.96	98.97
AT1G08190.1	70.24	68.84
AT1G08200.1	53.19	54.03
AT1G08230.2	21.29	22.12
AT1G08315.1	42.45	44.41
AT1G08360.1	57.65	55.67
AT1G08370.1	40.68	39.34
AT1G08380.1	82.17	86.89
AT1G08410.1	69.15	69.15
AT1G08420.1	37.6	38.07
AT1G08420.2	36.89	36.86
AT1G08450.1	55.08	55.08
AT1G08450.2	48.44	47.63
AT1G08450.3	36.65	36.75
AT1G08460.1	78.12	78.12
AT1G08465.1	40.36	38.73
AT1G08470.1	91.65	91.65
AT1G08480.1	49.64	47.22
AT1G08490.1	37.92	38.86
AT1G08510.1	55.22	55.22
AT1G08520.1	51	50.64
AT1G08530.1	15.13	16.14
AT1G08540.1	39.77	40.08
AT1G08550.1	35.76	34.71
AT1G08550.2	31.53	30.8
AT1G08560.1	50.51	48.68
AT1G08570.1	14.81	14.91
AT1G08570.2	55.27	54.13
AT1G08570.3	38.37	38.6
AT1G08570.4	65.7	66.47
AT1G08580.1	45.63	48.45
AT1G08600.1	41.82	42.95
AT1G08600.2	44.73	45.36
AT1G08600.3	44.73	45.36
AT1G08600.4	44.73	45.36
AT1G08610.1	68.99	68.61
AT1G08620.1	66.07	65.91
AT1G08620.2	66.07	65.91
AT1G08640.1	70.32	69.34
AT1G08650.1	97.4	97.05
AT1G08650.2	95.54	95.2
AT1G08660.1	63.8	62.55
AT1G08660.2	63.66	61.63
AT1G08680.1	58.04	57.74
AT1G08680.2	55.5	56.26
AT1G08680.3	35.16	34.59
AT1G08680.4	85.22	85.79
AT1G08700.1	20.22	20.22
AT1G08710.1	40.32	37.31
AT1G08710.2	76.33	74.23
AT1G08720.1	34.07	33.05
AT1G08760.1	68.18	67.44
AT1G08780.1	37.93	38.26
AT1G08800.1	52.39	52.34
AT1G08800.2	52.39	52.34
AT1G08810.1	64.68	63.67
AT1G08810.2	24.12	23.56
AT1G08820.1	34.4	34.3
AT1G08820.2	34.4	34.3
AT1G08830.1	37.76	37.76
AT1G08830.2	37.76	37.76
AT1G08845.1	34.43	33.33
AT1G08845.2	37.99	36.55
AT1G08880.1	17.42	17.56
AT1G08890.1	65.64	64.36
AT1G08910.1	27.46	27.61
AT1G08930.1	44.06	45.55
AT1G08930.2	41.39	42.26
AT1G08940.1	22.43	22.26
AT1G08970.1	36.99	37.67
AT1G08970.2	56.31	57.6
AT1G08970.3	39.01	40.47
AT1G08970.4	42.47	43.66
AT1G08980.1	49.29	50.61
AT1G09010.1	54.12	54.59
AT1G09020.1	42.41	42.68
AT1G09060.1	60.14	59.57
AT1G09060.2	59.57	59.08
AT1G09060.3	55.56	54.87
AT1G09070.1	49.67	48.86
AT1G09100.1	64.18	64.66
AT1G09130.1	53.29	53.85
AT1G09130.2	62.37	62.81
AT1G09130.3	65.15	63.99
AT1G09140.1	24.91	25.19
AT1G09140.2	57.53	57.98
AT1G09150.1	34.94	34.91
AT1G09160.1	43.91	44.02
AT1G09160.2	55.34	54.06
AT1G09190.1	61.62	61.75
AT1G09200.1	42.15	41.8
AT1G09210.1	61.03	60.71
AT1G09250.1	42.49	40.8
AT1G09270.1	38.78	37.81
AT1G09270.2	69.86	69.73
AT1G09270.3	52.86	53.35
AT1G09290.1	48.79	50.47
AT1G09300.2	39.38	38.53
AT1G09310.1	72.26	72.73
AT1G09320.1	7.24	7.27
AT1G09330.1	63.28	58.95
AT1G09340.1	46.79	47.96
AT1G09415.1	94.38	94.38
AT1G09430.1	24.51	24.45
AT1G09440.1	28.19	27.85
AT1G09470.1	30.03	29.75
AT1G09470.2	44.97	45.83
AT1G09490.1	38.64	38.14
AT1G09490.2	26.24	26.91
AT1G09560.1	65.19	67.82
AT1G09570.1	34.41	35.3
AT1G09570.2	50.73	51.84
AT1G09575.1	67.01	64.14
AT1G09580.1	22.39	22.61
AT1G09590.1	64.83	63.95
AT1G09620.1	24.37	23.6
AT1G09630.1	51.22	51.47
AT1G09640.1	14.32	14.8
AT1G09640.2	50.75	52.12
AT1G09645.1	15.15	14.29
AT1G09660.1	38.3	36.73
AT1G09660.2	62.89	61.22
AT1G09690.1	90.97	86.75
AT1G09700.1	48.74	50.79
AT1G09730.1	54.75	53.94
AT1G09730.2	36.07	36.11
AT1G09740.1	92.94	94.61
AT1G09750.1	32.12	33.82
AT1G09760.1	51.05	53.28
AT1G09770.1	29.11	29.3
AT1G09780.1	37.89	37.41
AT1G09794.1	93.1	94.74
AT1G09795.1	76.69	77.08
AT1G09815.1	33.33	33.04
AT1G09830.1	44.28	44.61
AT1G09840.1	46.04	45.8
AT1G09840.2	46.08	46.31
AT1G09840.3	46.08	46.31
AT1G09840.4	46.04	45.8
AT1G09840.5	46.08	46.31
AT1G09840.6	46.08	46.31
AT1G09850.1	44.65	45.28
AT1G09870.1	76.12	77.02
AT1G09900.1	22.3	23.05
AT1G09920.1	77.4	81.66
AT1G09940.1	50	50.88
AT1G09970.1	42.34	40.89
AT1G09970.2	46.93	45.37
AT1G10020.1	45.88	45.9
AT1G10060.1	21.48	21.26
AT1G10060.2	39.3	38.67
AT1G10090.1	43.32	44.4
AT1G10120.1	32.74	32.74
AT1G10150.1	63.46	62.56
AT1G10170.1	29.23	28.58
AT1G10200.1	83.91	84.88
AT1G10230.1	34.86	34.46
AT1G10270.1	46.09	46.97
AT1G10290.1	53.21	53.1
AT1G10310.1	25.56	24.36
AT1G10320.1	45.54	45.26
AT1G10350.1	53.4	52.11
AT1G10360.1	40.93	40.74
AT1G10390.1	25.91	25.46
AT1G10390.2	25.91	25.46
AT1G10410.1	56.81	55.86
AT1G10430.1	52.58	52.24
AT1G10450.1	41.23	40.43
AT1G10470.1	43.02	43.53
AT1G10500.1	48.02	51.2
AT1G10510.1	30.82	30.15
AT1G10522.1	46.11	47.83
AT1G10522.2	37.04	39.22
AT1G10550.1	77.52	76.24
AT1G10570.1	45.57	45.32
AT1G10570.2	49.26	48.54
AT1G10580.1	61.12	60.63
AT1G10590.1	21.05	20.44
AT1G10590.2	21.05	20.44
AT1G10590.3	46.62	45.1
AT1G10600.1	58.14	59.52
AT1G10600.2	95.65	95.06
AT1G10600.3	54.29	55.34
AT1G10610.1	42.42	42.82
AT1G10630.1	44.94	47.9
AT1G10650.1	45.3	45.76
AT1G10650.2	46.12	47.98
AT1G10660.1	37.85	37.3
AT1G10660.2	36.28	35.85
AT1G10660.3	36.28	35.85
AT1G10660.4	36.28	35.85
AT1G10670.1	43.97	42.89
AT1G10670.2	43.97	42.89
AT1G10670.3	66.12	65.35
AT1G10670.4	43.97	42.89
AT1G10700.1	40.46	39.75
AT1G10720.1	45.28	44.1
AT1G10730.1	31.24	31.75
AT1G10740.4	56.67	56.31
AT1G10760.1	42.72	43.23
AT1G10820.2	47.88	46.69
AT1G10830.1	87.78	88.76
AT1G10830.2	92.58	89.43
AT1G10840.1	22.09	22.56
AT1G10840.2	13.2	13.75
AT1G10850.1	45.29	45.78
AT1G10865.1	85.07	89.06
AT1G10865.2	48.21	50
AT1G10870.1	50.39	51.47
AT1G10890.1	44.68	43.93
AT1G10900.1	33.69	34.43
AT1G10910.1	57.05	57.59
AT1G10930.1	44.52	44.64
AT1G10940.1	18.18	19.31
AT1G10940.2	18.5	19.57
AT1G10950.1	40.99	40.92
AT1G10960.1	49.61	50.39
AT1G11020.1	40.74	40.99
AT1G11170.1	34.77	35.19
AT1G11210.1	45.94	45.61
AT1G11220.1	72.31	70.25
AT1G11240.1	100	100
AT1G11260.1	46.08	47.44
AT1G11280.1	59.16	58.94
AT1G11280.2	56.39	56.33
AT1G11280.3	55.32	55.39
AT1G11280.4	58.14	58.07
AT1G11310.1	28.02	28.24
AT1G11310.2	49.49	50.26
AT1G11330.1	54.99	55.91
AT1G11330.2	52.77	52.47
AT1G11350.1	46.27	46.55
AT1G11360.1	36.25	37.83
AT1G11360.2	35.66	38.33
AT1G11360.3	95.47	95.87
AT1G11360.4	40.74	42.31
AT1G11380.1	29.69	30.16
AT1G11400.1	49.72	52.38
AT1G11400.2	61.02	63.16
AT1G11400.3	49.72	52.38
AT1G11430.1	40.58	40.98
AT1G11440.1	23.12	22.71
AT1G11475.1	88.24	86.96
AT1G11480.1	61.6	60.81
AT1G11480.2	61.13	59.78
AT1G11520.1	37.78	37.78
AT1G11530.1	72.95	74.17
AT1G11580.1	39.81	39.3
AT1G11630.1	53.88	53.88
AT1G11650.1	30.8	31.01
AT1G11650.2	30.55	30
AT1G11660.1	40.74	40.68
AT1G11680.1	37.58	38.23
AT1G11700.1	77.78	75.68
AT1G11720.1	52.53	52.27
AT1G11720.2	68.45	67.74
AT1G11750.1	46.37	46
AT1G11750.2	45.69	46.04
AT1G11755.1	66.8	68.15
AT1G11790.1	71.01	71.2
AT1G11820.1	50.7	52.3
AT1G11820.2	42.27	42.8
AT1G11840.1	71.43	71.43
AT1G11840.2	71.43	71.43
AT1G11840.3	71.43	71.43
AT1G11840.4	69.29	69.78
AT1G11840.5	66.1	65.82
AT1G11840.6	40.51	39.75
AT1G11850.1	46.67	47.19
AT1G11850.2	56.48	59.22
AT1G11850.3	71.43	68.18
AT1G11850.4	36.17	38.04
AT1G11860.1	64.3	64.63
AT1G11860.2	68.1	69.15
AT1G11860.3	82.71	82.09
AT1G11870.1	30.74	29.28
AT1G11870.2	25.85	24.95
AT1G11870.3	25.48	24.41
AT1G11890.1	58.5	56.8
AT1G11905.1	54.63	55.11
AT1G11910.1	26.11	25.6
AT1G11930.1	75.51	74.3
AT1G11930.2	68.72	68.16
AT1G11960.1	81.55	81.23
AT1G12000.1	37.1	37.3
AT1G12020.1	38.29	37.12
AT1G12050.1	43.77	43.1
AT1G12060.1	78.53	76.92
AT1G12080.1	87.32	91.18
AT1G12080.2	96.15	95.24
AT1G12090.1	73.68	76.36
AT1G12120.1	28.54	28.28
AT1G12140.1	45.75	45.54
AT1G12140.2	44.86	45.07
AT1G12230.1	32.64	32.98
AT1G12230.2	53.9	53.9
AT1G12240.1	30.39	30.34
AT1G12244.1	31.69	31.43
AT1G12250.1	28.95	28.84
AT1G12250.2	28.21	27.23
AT1G12270.1	39.27	39.88
AT1G12310.1	42.96	41.22
AT1G12320.1	19	19.69
AT1G12330.1	39.31	40.09
AT1G12360.1	25.66	25.2
AT1G12410.1	47.51	48.82
AT1G12420.1	85.81	86.01
AT1G12430.1	29.54	28.75
AT1G12430.2	50	50.11
AT1G12440.1	86.54	90.6
AT1G12440.2	86.45	90.6
AT1G12470.1	46.32	46.84
AT1G12500.1	45.25	44.27
AT1G12520.1	44.22	44.52
AT1G12520.2	73.43	72.73
AT1G12520.3	71.78	72.67
AT1G12530.1	41.98	44.16
AT1G12580.1	30.86	31.59
AT1G12650.1	83.65	84.47
AT1G12650.2	83.65	84.47
AT1G12650.3	84.13	82.55
AT1G12650.4	84.13	82.55
AT1G12680.1	37.94	37.37
AT1G12750.1	54.43	56.21
AT1G12750.2	32.67	32.67
AT1G12750.3	53.31	55.78
AT1G12760.1	48.37	47.77
AT1G12760.2	38.76	39.58
AT1G12770.1	34.48	34.48
AT1G12780.1	64.55	63.28
AT1G12800.1	36.44	36.85
AT1G12810.1	82.57	86.54
AT1G12810.2	87.16	90.21
AT1G12820.1	43.16	43.23
AT1G12830.1	33.7	33.15
AT1G12840.1	40.81	39.43
AT1G12850.1	61.39	60.84
AT1G12860.1	52.72	54.66
AT1G12880.1	71	71.72
AT1G12900.1	38.21	39.52
AT1G12900.2	46.82	44.87
AT1G12900.3	31.2	32.62
AT1G12900.4	28.9	29.94
AT1G12910.1	52.62	51.13
AT1G12920.1	29.88	30.83
AT1G12930.1	50.91	50.3
AT1G12970.1	61.3	61.04
AT1G13000.1	45.71	47.06
AT1G13000.2	57.92	58.99
AT1G13020.1	39.73	39.13
AT1G13030.1	29.54	29.17
AT1G13060.1	56.65	53.99
AT1G13060.2	31.79	30.69
AT1G13090.1	37.82	37.89
AT1G13110.1	39.96	38.07
AT1G13120.1	55.35	55.25
AT1G13160.1	56.67	56.15
AT1G13170.1	51.46	52.49
AT1G13170.2	36.35	38.05
AT1G13190.1	66.1	65.98
AT1G13210.1	31.36	31.15
AT1G13220.1	42.29	42.05
AT1G13220.2	46.27	46.08
AT1G13245.1	100	100
AT1G13250.1	31.35	31.45
AT1G13260.1	62.76	64.11
AT1G13270.1	63.1	63.78
AT1G13270.2	45.32	44.21
AT1G13280.1	16.81	16.81
AT1G13320.1	47.61	47.77
AT1G13320.2	79.1	79.85
AT1G13320.3	48.63	48.63
AT1G13350.1	67.83	67.78
AT1G13350.2	24.69	24.03
AT1G13360.1	42.08	43.15
AT1G13360.2	50	47.98
AT1G13360.3	48.09	47.57
AT1G13380.1	37.57	36.93
AT1G13390.1	67.44	67.05
AT1G13390.2	67.25	64.97
AT1G13440.1	74.49	75.15
AT1G13440.2	59.03	57.55
AT1G13450.1	72.03	70.36
AT1G13450.2	41.67	41.92
AT1G13450.3	82.57	81.89
AT1G13460.1	28.43	28.08
AT1G13460.2	28.43	28.19
AT1G13470.1	31.99	31.99
AT1G13560.1	38.4	38.61
AT1G13560.2	43.53	43.27
AT1G13640.1	44.78	44.69
AT1G13690.1	44.51	44.79
AT1G13730.1	58.09	57.95
AT1G13740.1	56.82	57.38
AT1G13790.1	41.96	42.46
AT1G13810.1	66.99	65.71
AT1G13820.1	63.08	61.93
AT1G13870.1	27.95	27.67
AT1G13880.1	35.61	34.81
AT1G13900.1	20.97	20.41
AT1G13920.1	48.87	48.71
AT1G13930.1	82.78	85.03
AT1G13930.2	80.41	80.95
AT1G13930.3	80.41	80.95
AT1G13950.1	26.67	25.81
AT1G13960.1	64.3	64.3
AT1G13960.2	59.69	60.63
AT1G13980.1	41.69	41.35
AT1G13980.2	41.69	41.35
AT1G13990.1	58.3	58.52
AT1G13990.2	56.08	55
AT1G13990.3	34.3	34.31
AT1G14000.1	29.95	29.59
AT1G14010.1	32.45	30.05
AT1G14030.1	61.06	58.69
AT1G14060.1	72.61	69.94
AT1G14140.1	47.06	48.48
AT1G14150.1	56	58.33
AT1G14150.2	70.63	69.66
AT1G14170.1	42.24	44.07
AT1G14170.2	24.45	25.69
AT1G14170.3	25.46	26.71
AT1G14200.1	36.84	35.2
AT1G14250.1	49.04	48.01
AT1G14270.1	58.75	60.55
AT1G14270.2	34.93	34.04
AT1G14270.3	33.81	33.97
AT1G14270.4	33.81	35.15
AT1G14280.1	40.52	41.81
AT1G14300.1	19.7	19.52
AT1G14300.2	28.8	28.8
AT1G14310.1	56.1	54.12
AT1G14320.1	70.09	70.75
AT1G14320.2	18.95	18.12
AT1G14330.1	63.54	63.68
AT1G14345.1	94.55	97.5
AT1G14350.1	80.15	81.28
AT1G14350.2	83.13	83.5
AT1G14360.1	38.15	38.27
AT1G14380.1	49.45	49.6
AT1G14380.2	75.35	74.78
AT1G14380.3	49.45	49.6
AT1G14400.1	58.9	60.56
AT1G14400.2	58.9	60.56
AT1G14410.1	45.42	45.56
AT1G14440.1	39.42	37.89
AT1G14440.2	39.42	37.89
AT1G14450.1	9.09	9.09
AT1G14460.1	31.01	31.32
AT1G14510.1	62.6	63.37
AT1G14570.1	34.2	35.67
AT1G14570.2	34.2	35.67
AT1G14570.3	68.81	70.59
AT1G14570.4	68.81	70.59
AT1G14580.1	51.41	52.14
AT1G14580.2	51.05	51.65
AT1G14610.1	57.37	57.7
AT1G14620.1	27.19	25.88
AT1G14620.2	18.84	18.57
AT1G14640.1	53.05	53.05
AT1G14650.1	41.48	42.21
AT1G14650.2	41.48	42.45
AT1G14670.1	57.89	59.51
AT1G14680.1	21.25	21.64
AT1G14685.1	32.45	32.33
AT1G14685.2	45.72	46.24
AT1G14685.3	46.07	46.24
AT1G14687.1	78.34	78.34
AT1G14690.1	51.81	51.81
AT1G14690.2	81.24	80.07
AT1G14700.1	74.35	73.71
AT1G14700.2	76.76	75
AT1G14710.1	67.14	67.26
AT1G14710.2	64.02	64.59
AT1G14720.1	44.66	44.52
AT1G14740.1	42.2	41.07
AT1G14810.1	44.12	45.96
AT1G14820.1	83.47	83.83
AT1G14820.3	22.59	21.95
AT1G14830.1	33.56	34.43
AT1G14840.1	64.18	65.37
AT1G14840.2	66.73	68.02
AT1G14880.1	54.3	51.25
AT1G14890.1	20.9	20.49
AT1G14900.1	8.56	8.21
AT1G14910.1	35.9	36.56
AT1G14980.1	43.33	43.82
AT1G14990.1	18.02	17.09
AT1G14990.2	80.83	76.38
AT1G15000.1	88.39	86.57
AT1G15020.1	48.22	48.13
AT1G15020.2	29.23	28.39
AT1G15030.1	46.05	46.44
AT1G15060.1	39.61	40.04
AT1G15120.1	100	98.48
AT1G15120.2	74.1	75
AT1G15125.1	19.48	20.07
AT1G15130.1	31.66	32.29
AT1G15140.1	17.14	17.39
AT1G15140.2	61.75	63.41
AT1G15140.3	61.75	63.41
AT1G15180.1	42.2	43.54
AT1G15180.2	63.85	64.34
AT1G15200.1	43.41	46.06
AT1G15200.2	55.46	57.18
AT1G15200.3	53.68	55.16
AT1G15200.4	49.48	49.61
AT1G15230.1	73.19	74.26
AT1G15240.2	39.62	40.53
AT1G15250.1	19.51	18.39
AT1G15260.1	55.33	53.55
AT1G15270.1	42.31	47.83
AT1G15280.1	39.11	38.41
AT1G15280.2	31.18	31.25
AT1G15290.1	37.16	37.64
AT1G15310.1	69.84	69.54
AT1G15340.1	80.14	78.52
AT1G15340.2	76.27	70.87
AT1G15350.1	77.03	76.51
AT1G15350.2	75	76.03
AT1G15350.3	79.44	84.16
AT1G15370.1	68	67.11
AT1G15390.1	91.82	90.15
AT1G15400.1	90.15	92.25
AT1G15400.2	46.03	45.67
AT1G15400.3	85.38	86.72
AT1G15420.1	33.46	35.16
AT1G15470.1	64.92	64.53
AT1G15480.1	52.78	53.16
AT1G15500.1	36.44	36.93
AT1G15510.1	56.7	56.77
AT1G15530.1	68.62	68.93
AT1G15660.1	23.52	23.41
AT1G15690.1	61.75	62.32
AT1G15690.2	47.42	47.65
AT1G15710.1	42.44	43.2
AT1G15730.1	16.78	17.12
AT1G15740.1	71.82	69.72
AT1G15750.1	56	55.95
AT1G15750.2	49.91	49.52
AT1G15750.3	49.91	49.52
AT1G15750.4	56	55.95
AT1G15780.1	44.45	43.75
AT1G15790.1	69.14	67.88
AT1G15790.2	69.14	67.88
AT1G15810.1	51.41	52.62
AT1G15820.1	55.91	55.69
AT1G15830.1	42.79	42.27
AT1G15860.1	67.11	66.52
AT1G15860.2	67.11	66.52
AT1G15860.3	81.51	81.17
AT1G15880.1	43.32	42.73
AT1G15885.1	28.05	28.75
AT1G15910.1	34.77	33.51
AT1G15930.1	27.66	27.27
AT1G15930.2	27.66	27.27
AT1G15940.1	44.6	44.09
AT1G15950.1	82.7	83.43
AT1G15950.2	74.33	73.89
AT1G15970.1	19.05	18.77
AT1G15980.1	58.12	60.19
AT1G16000.1	100	97.5
AT1G16010.1	42.89	43.08
AT1G16010.2	42.89	43.08
AT1G16010.3	42.89	43.08
AT1G16040.1	34.25	34.88
AT1G16080.1	61.71	62.5
AT1G16170.1	95	93.83
AT1G16180.1	46.35	45.66
AT1G16180.2	46.35	45.66
AT1G16190.1	83.82	82.86
AT1G16210.1	34.8	35.32
AT1G16240.1	71.04	69.16
AT1G16240.2	71.04	69.16
AT1G16240.3	65.44	61.74
AT1G16260.1	31.63	30.62
AT1G16260.2	31.63	30.62
AT1G16270.1	45.81	45.16
AT1G16270.2	45.81	45.16
AT1G16320.1	80.32	79.05
AT1G16350.1	40.9	40.32
AT1G16410.1	68.06	67.93
AT1G16410.2	59.79	59.64
AT1G16430.1	50	49.63
AT1G16460.1	25.08	25.56
AT1G16460.2	40.35	40
AT1G16460.3	25.08	25.56
AT1G16460.4	25.08	25.56
AT1G16470.1	48.91	50
AT1G16470.2	48.91	49.78
AT1G16500.1	46.59	46.22
AT1G16520.1	42.14	41.04
AT1G16560.1	24.04	23.89
AT1G16560.2	24.33	24.12
AT1G16560.3	23.15	23.15
AT1G16560.4	21.82	21.66
AT1G16610.1	31.4	32.25
AT1G16610.2	23.54	23.92
AT1G16610.3	35.51	34.78
AT1G16630.1	25.72	25.5
AT1G16670.1	27.91	27.18
AT1G16680.1	31.04	30.36
AT1G16700.1	71.75	72.52
AT1G16720.1	31.39	31.07
AT1G16740.1	34.82	33.91
AT1G16790.1	46.21	45.86
AT1G16810.1	49.09	50
AT1G16810.2	55.05	55.56
AT1G16840.1	26.57	26.95
AT1G16840.2	21.01	21.97
AT1G16840.3	20.57	21.17
AT1G16840.4	28.17	28.99
AT1G16850.1	67.63	63.95
AT1G16858.1	100	92.31
AT1G16860.1	34.84	34.47
AT1G16870.1	79.74	79.7
AT1G16880.1	75.55	74.73
AT1G16880.2	19.47	18.69
AT1G16890.1	75.73	73.58
AT1G16890.2	61.31	62.69
AT1G16890.3	74	76.03
AT1G16916.1	100	100
AT1G16920.1	24.62	23.33
AT1G16960.1	75.24	74.53
AT1G17050.1	60.34	60.63
AT1G17070.1	57.26	57.68
AT1G17080.1	62.14	59.59
AT1G17100.1	74.06	73.02
AT1G17110.1	42.12	41.6
AT1G17110.2	42.42	41.99
AT1G17130.1	42.47	42.18
AT1G17130.2	49.17	49.01
AT1G17140.1	73.08	74.51
AT1G17140.2	90.06	90.35
AT1G17145.1	46.08	44.48
AT1G17160.1	52.2	50.94
AT1G17160.2	57.88	57.55
AT1G17210.1	50.42	50.53
AT1G17220.1	71.34	70.99
AT1G17280.1	45.33	44.93
AT1G17280.2	50.66	51.1
AT1G17290.1	32.62	33.07
AT1G17330.1	24.23	24.1
AT1G17340.1	49.48	49.35
AT1G17360.1	39.24	39.08
AT1G17370.1	60.49	61.69
AT1G17370.2	54.01	56.46
AT1G17380.1	88.35	90.91
AT1G17420.1	49.36	49.59
AT1G17430.1	44.31	44.98
AT1G17440.1	58.08	59.13
AT1G17440.2	68.09	68.83
AT1G17455.1	66.36	66.98
AT1G17455.2	66.36	66.98
AT1G17470.1	39.29	38.03
AT1G17470.2	39.29	38.13
AT1G17490.1	92.54	95.38
AT1G17500.1	44.31	44.63
AT1G17510.1	94.59	96.33
AT1G17520.1	59.63	58.55
AT1G17530.1	93.4	93.88
AT1G17550.1	37.04	36.38
AT1G17580.1	30.9	30.65
AT1G17620.1	56.25	54.78
AT1G17650.1	8.92	8.58
AT1G17665.1	48.84	48.84
AT1G17680.1	57.21	56.42
AT1G17680.2	57.56	57.03
AT1G17690.1	42.01	42.58
AT1G17720.1	76.09	75.26
AT1G17720.2	75.99	75.16
AT1G17730.1	34.5	35.94
AT1G17745.1	73.05	72.19
AT1G17745.2	47.77	47.48
AT1G17780.1	43.82	43.82
AT1G17780.2	69.17	71.14
AT1G17820.1	48.53	48.1
AT1G17840.1	35.44	35.09
AT1G17850.1	75.36	74.82
AT1G17850.2	39.9	39.43
AT1G17880.1	81.08	78.95
AT1G17890.1	29.1	29.28
AT1G17890.2	52.63	52.81
AT1G17890.3	52.63	52.81
AT1G17930.1	33.9	33.54
AT1G17970.1	65.99	66.38
AT1G17980.1	40.09	40.2
AT1G17980.2	44.09	44.82
AT1G17990.1	51.47	53.03
AT1G17990.2	51.36	51.16
AT1G18000.1	38.43	38.34
AT1G18010.1	38.43	38.34
AT1G18020.1	51.47	53.03
AT1G18030.1	55.27	54.34
AT1G18030.2	47.02	47.97
AT1G18060.1	74.3	72.6
AT1G18070.1	52	51.99
AT1G18070.2	56.2	56.2
AT1G18070.3	81.85	82.01
AT1G18080.1	69.46	72.27
AT1G18150.1	44.76	45.82
AT1G18150.2	44.76	45.82
AT1G18150.3	47.42	48.72
AT1G18160.1	40.76	40.89
AT1G18170.1	44.54	43.98
AT1G18190.1	49.43	49.83
AT1G18210.1	41.72	42.77
AT1G18210.2	41.72	42.77
AT1G18250.1	45.12	46.63
AT1G18250.2	39.34	40.69
AT1G18260.1	64.76	64.86
AT1G18265.1	38.29	38.29
AT1G18300.1	66.67	69.15
AT1G18370.1	32.48	32.66
AT1G18440.1	26.43	27.51
AT1G18450.1	41.08	40.51
AT1G18470.1	38.68	39.96
AT1G18470.2	46.19	47.78
AT1G18480.1	59.21	60.1
AT1G18485.1	35.35	36.12
AT1G18490.1	36.36	37.17
AT1G18500.1	60.2	59.6
AT1G18540.1	51.66	49.32
AT1G18580.1	48.09	49.03
AT1G18590.1	54.36	55.33
AT1G18620.1	50.27	50.54
AT1G18620.2	36.85	37.11
AT1G18630.1	79.49	78.98
AT1G18650.1	25.14	26.04
AT1G18660.1	46.48	46.48
AT1G18660.2	46.48	46.48
AT1G18660.3	46.48	46.48
AT1G18660.4	46.83	47.41
AT1G18670.1	40.43	41.07
AT1G18700.1	44.81	45.53
AT1G18700.2	49.2	49.2
AT1G18700.3	50.5	51.32
AT1G18700.4	45.49	45.95
AT1G18720.1	43.3	43.98
AT1G18730.1	50.88	55.06
AT1G18730.2	75.91	77.04
AT1G18730.3	35.62	33.93
AT1G18730.4	68.29	73.2
AT1G18740.1	41.67	41.89
AT1G18800.1	55.86	55.61
AT1G18810.1	22.06	23.69
AT1G18840.1	22.78	22.95
AT1G18840.2	40.11	40.3
AT1G18890.1	52.26	51.48
AT1G18950.1	32.5	31.76
AT1G19000.1	18.01	17.6
AT1G19000.2	20.69	20.22
AT1G19010.1	78.42	78.16
AT1G19010.2	57.88	58.52
AT1G19020.1	36.99	36.99
AT1G19050.1	98.04	96.15
AT1G19080.1	56.5	57.14
AT1G19080.2	68.36	69.54
AT1G19110.1	66.44	66.53
AT1G19120.1	75	68.5
AT1G19130.1	38.76	37.91
AT1G19150.1	25.7	25.1
AT1G19180.1	21.88	20.85
AT1G19180.2	40.37	40.37
AT1G19240.1	51.65	47.47
AT1G19300.1	59.66	57.28
AT1G19310.1	50.23	50
AT1G19350.1	77.32	76.79
AT1G19350.3	51.92	53.47
AT1G19350.4	81.79	82.35
AT1G19350.5	81.79	82.35
AT1G19350.6	77.32	76.79
AT1G19360.1	60.69	62.12
AT1G19370.1	40.1	40.37
AT1G19396.1	6.25	6.38
AT1G19396.3	10.2	11.11
AT1G19397.1	51.52	53.12
AT1G19400.1	24.57	24.65
AT1G19400.2	24.57	24.65
AT1G19430.1	49.63	49.85
AT1G19440.1	66.47	65.29
AT1G19485.1	43.95	44.4
AT1G19485.2	63.07	64.61
AT1G19520.1	68.77	68.92
AT1G19520.2	39.71	37.75
AT1G19530.1	12.75	12.38
AT1G19550.1	94.08	93.46
AT1G19570.1	98.98	98.98
AT1G19570.2	96.95	95.98
AT1G19580.1	57.58	56.93
AT1G19580.2	62.73	64.19
AT1G19600.1	53.09	53.52
AT1G19660.1	50.62	50.15
AT1G19660.2	50.62	50.15
AT1G19670.1	44.06	43.79
AT1G19680.1	48.86	49.65
AT1G19690.1	37.54	36.72
AT1G19700.1	27.6	27.22
AT1G19700.2	27.54	27.22
AT1G19700.3	25.8	25.15
AT1G19710.1	54.03	54.37
AT1G19715.1	40.86	40.17
AT1G19715.2	46.4	45.42
AT1G19715.3	44.65	44.2
AT1G19720.1	25.54	25.68
AT1G19730.1	31.82	30.17
AT1G19740.1	41.98	43.82
AT1G19770.1	51.86	55.86
AT1G19800.1	67.15	67.54
AT1G19800.2	64.53	64.91
AT1G19800.3	64.53	64.91
AT1G19835.1	34.29	34.29
AT1G19835.2	35.17	35.17
AT1G19870.1	59.03	57.53
AT1G19880.1	28.97	27.86
AT1G19910.1	1.75	1.84
AT1G19920.1	30.22	29.45
AT1G19950.1	29.3	30.19
AT1G19960.1	100	100
AT1G19990.1	21.15	20.95
AT1G20010.1	75.8	76.85
AT1G20020.1	47.65	47.51
AT1G20020.2	36.28	35.83
AT1G20020.3	43.86	44.12
AT1G20050.1	58.13	58.62
AT1G20090.1	55.9	58.6
AT1G20100.1	32.55	32.05
AT1G20100.2	28.79	29.84
AT1G20110.1	51.87	52.81
AT1G20140.1	44.52	43.05
AT1G20190.1	57.14	57.38
AT1G20200.1	53.32	52.32
AT1G20220.1	32.33	33.2
AT1G20225.1	65.31	61.24
AT1G20260.1	40.98	42.05
AT1G20270.1	63.67	62.5
AT1G20300.1	56.57	56.46
AT1G20330.1	70.03	71.26
AT1G20340.1	99.37	98.74
AT1G20370.1	54.81	53.98
AT1G20410.1	59.25	57.81
AT1G20430.1	62.5	61.4
AT1G20440.1	100	100
AT1G20450.1	45.1	45.32
AT1G20450.2	62.14	63.37
AT1G20460.1	67.92	69.23
AT1G20510.1	50.1	50.1
AT1G20510.2	30.42	30.42
AT1G20560.1	44.21	43.97
AT1G20560.2	40.04	40.04
AT1G20575.1	39.11	37.45
AT1G20580.1	55.28	56.2
AT1G20610.1	22.69	22.64
AT1G20620.1	50	50.96
AT1G20620.2	58.97	61.07
AT1G20620.4	34.24	35.8
AT1G20620.5	47.37	48.81
AT1G20630.1	24.84	23.69
AT1G20670.1	36.1	34.9
AT1G20693.1	29.41	28.46
AT1G20693.2	26.89	26.89
AT1G20693.3	26.45	26.02
AT1G20696.1	96.72	96.72
AT1G20696.2	33.07	31.82
AT1G20696.3	96.77	96.77
AT1G20760.1	73.78	73.93
AT1G20770.1	62.75	62.75
AT1G20780.1	37.63	37.63
AT1G20810.1	52.47	53.67
AT1G20816.1	14.94	14.29
AT1G20830.1	41.84	41.47
AT1G20840.1	27.11	26.96
AT1G20850.1	47.21	46.4
AT1G20920.1	69.18	70.09
AT1G20920.2	34.81	35.79
AT1G20930.1	63.55	63.55
AT1G20950.1	50.17	51.71
AT1G20970.1	48.57	49.36
AT1G20980.1	58.31	57.39
AT1G21065.1	65.57	67.8
AT1G21080.1	53.31	51.68
AT1G21080.2	56.46	55.84
AT1G21080.3	43.14	42.42
AT1G21100.1	48.36	49.86
AT1G21110.1	38.12	39.89
AT1G21120.1	46.77	47.67
AT1G21130.1	37.26	37.78
AT1G21130.2	38.7	37.54
AT1G21160.1	38.7	38.56
AT1G21170.1	26.98	27.28
AT1G21190.1	100	98.89
AT1G21200.1	40.19	40.76
AT1G21210.1	34.67	35.11
AT1G21240.1	45.32	45.94
AT1G21245.1	99.38	99.38
AT1G21250.1	76.44	76.54
AT1G21270.1	44	43.5
AT1G21310.1	82.68	86.05
AT1G21350.1	66.44	70.21
AT1G21350.2	66.07	65.78
AT1G21350.3	72.4	74.18
AT1G21370.1	68.9	71.17
AT1G21370.2	72.97	75.38
AT1G21380.1	20.96	21.88
AT1G21390.1	43.86	42.55
AT1G21400.1	30.35	29.2
AT1G21440.1	31.9	32.7
AT1G21450.1	47.28	47.86
AT1G21500.1	77.78	78.5
AT1G21560.1	82.43	81.61
AT1G21560.2	31.99	30.59
AT1G21560.3	31.99	30.59
AT1G21590.1	39.19	38.58
AT1G21600.1	53.82	54.17
AT1G21600.2	51.79	50.96
AT1G21610.1	23.7	24.12
AT1G21610.2	44.6	43.7
AT1G21610.3	30.91	31.66
AT1G21630.1	25.2	24.85
AT1G21630.2	32.48	32.17
AT1G21640.1	38.33	38.45
AT1G21640.2	46.51	46.7
AT1G21650.1	37.97	37.41
AT1G21650.2	34.28	33.56
AT1G21660.1	27.03	25.93
AT1G21670.1	50.8	51.63
AT1G21680.1	27.42	27.78
AT1G21690.1	23.05	23.12
AT1G21690.2	38.89	40.78
AT1G21690.3	20.49	21.14
AT1G21690.4	33.12	33.65
AT1G21700.1	64.89	65.42
AT1G21720.1	87.75	89.5
AT1G21750.1	51.39	50.21
AT1G21750.2	46.51	44.94
AT1G21760.1	83.71	83.71
AT1G21770.1	97.12	94.39
AT1G21780.1	55.27	55.81
AT1G21780.2	62.87	64.33
AT1G21790.1	62.68	62.9
AT1G21830.1	52.46	53.93
AT1G21880.1	80.28	80.84
AT1G21880.2	33.16	33.97
AT1G21900.1	31.98	29.86
AT1G21910.1	92.45	95.15
AT1G21920.1	71.25	69.54
AT1G21930.1	59.55	61.63
AT1G21980.1	63.05	61.04
AT1G22070.1	76.41	75.6
AT1G22140.1	95.16	96.72
AT1G22160.1	14.5	14.18
AT1G22190.1	73.52	73.52
AT1G22200.1	44.29	42.89
AT1G22200.2	27.38	26.89
AT1G22230.1	54.95	54.21
AT1G22250.1	81.77	78.31
AT1G22270.1	13.91	14.04
AT1G22280.1	58.63	61.05
AT1G22280.2	79.08	79.9
AT1G22280.3	61.96	60.42
AT1G22300.1	56.72	56.02
AT1G22300.2	30.58	30.71
AT1G22300.3	29.96	30.96
AT1G22310.1	29.85	31.2
AT1G22310.2	36.35	37.55
AT1G22330.1	36.18	38.2
AT1G22360.1	67.83	66.81
AT1G22360.2	41.41	41.96
AT1G22370.1	76.32	77.08
AT1G22370.2	60.74	59.41
AT1G22400.1	49.49	48.59
AT1G22410.1	33.08	34.06
AT1G22430.1	31.52	31.69
AT1G22430.2	44.53	44.53
AT1G22450.1	38.15	39.05
AT1G22520.1	94	91.18
AT1G22520.2	53.26	53.85
AT1G22530.1	55.23	55.41
AT1G22590.1	78.38	79.82
AT1G22590.2	74.15	74.66
AT1G22610.1	43.81	43.55
AT1G22620.1	56.77	56.77
AT1G22630.1	58.88	61.76
AT1G22690.1	52.54	56.88
AT1G22690.2	52.54	56.36
AT1G22690.3	52.54	56.36
AT1G22700.1	44.04	44.33
AT1G22700.2	52.03	52.38
AT1G22700.3	30.62	30.62
AT1G22710.1	50.4	48.92
AT1G22730.1	26.09	26.54
AT1G22740.1	29.17	27.64
AT1G22780.1	31.69	30
AT1G22790.1	40.89	39.71
AT1G22790.2	40.89	39.71
AT1G22800.1	65.25	62.94
AT1G22840.1	85.19	86.79
AT1G22840.2	40.22	40.66
AT1G22850.1	49.53	48.61
AT1G22882.1	30.97	31.68
AT1G22885.1	52.73	59.18
AT1G22885.2	45	51.92
AT1G22890.1	29.41	28.3
AT1G22910.1	65.65	65.94
AT1G22910.2	41.15	42.27
AT1G22910.3	58.49	58.13
AT1G22930.1	30.78	30.36
AT1G22930.2	34.52	34.27
AT1G22940.1	39.31	39.61
AT1G22950.1	24.11	23.98
AT1G22970.1	67.7	69.77
AT1G23020.1	65.48	65.1
AT1G23020.2	25.59	25.94
AT1G23030.1	73.34	73.47
AT1G23080.1	46.36	46.13
AT1G23080.2	27.18	27.78
AT1G23080.3	51.24	51.24
AT1G23090.1	25.13	24.79
AT1G23130.1	8.64	8.86
AT1G23190.1	63.53	63.1
AT1G23205.1	50.29	49.44
AT1G23220.1	55.46	54.1
AT1G23260.1	34.93	34.69
AT1G23280.1	70.68	69.89
AT1G23290.1	54.35	52.08
AT1G23310.1	42.44	43.72
AT1G23310.2	81.09	81.65
AT1G23360.1	86.09	86.04
AT1G23360.2	61.11	61.88
AT1G23360.3	63.58	63.58
AT1G23390.1	26.92	27.42
AT1G23400.1	63.17	64.77
AT1G23410.1	58.52	57.66
AT1G23440.1	24.77	25.36
AT1G23490.1	70.81	71.58
AT1G23710.1	39.19	38.63
AT1G23740.1	56.76	55.26
AT1G23750.1	56.8	58.2
AT1G23820.1	86.07	87.26
AT1G23820.2	51.58	51.58
AT1G23860.1	64.09	61.17
AT1G23860.2	64.09	61.17
AT1G23860.3	52.66	52.35
AT1G23860.4	57.14	58.79
AT1G23870.1	67.82	68.13
AT1G23900.1	31.74	32
AT1G23900.2	31.74	32
AT1G23950.1	31.5	33.08
AT1G23950.2	25.54	25.27
AT1G23950.3	35.89	36.8
AT1G23950.4	25.69	27.54
AT1G23950.5	49.55	49.7
AT1G23960.1	90.44	89.23
AT1G23960.2	59	60
AT1G23970.1	50.4	51.94
AT1G23970.2	41.64	43.13
AT1G24020.1	27.52	27.89
AT1G24020.2	27.52	27.89
AT1G24040.1	64.53	65.73
AT1G24050.1	22.29	23.08
AT1G24100.1	70.07	69.21
AT1G24120.1	40.29	41.1
AT1G24147.1	51.75	52.68
AT1G24160.1	41.62	41.53
AT1G24160.2	40.81	40.73
AT1G24170.1	38.46	38.94
AT1G24180.1	51.03	50.77
AT1G24190.1	45.16	46.09
AT1G24190.2	49.53	50
AT1G24240.1	72.12	74.63
AT1G24267.1	48.79	48.2
AT1G24267.2	22.63	21.14
AT1G24300.1	38.71	39.48
AT1G24300.2	39.31	40.15
AT1G24310.1	83.43	84.15
AT1G24340.1	33.33	32.67
AT1G24350.1	36.84	35.44
AT1G24350.2	90	88.64
AT1G24360.1	62.42	62.5
AT1G24450.1	64.61	63.89
AT1G24490.1	37.8	36.83
AT1G24490.2	31.58	30.21
AT1G24510.1	55.32	55.32
AT1G24510.2	34.92	34.3
AT1G24560.1	38.14	37.3
AT1G24575.1	53.75	59.72
AT1G24610.1	56.53	58.02
AT1G24625.1	71.13	67.98
AT1G24764.1	62.59	64.02
AT1G24793.1	20.5	21.17
AT1G24793.2	36.47	35.93
AT1G24800.1	40.66	39.46
AT1G24807.1	93.42	95.52
AT1G24880.1	29.64	31.01
AT1G24880.2	68.18	71.43
AT1G24880.3	44.14	47.12
AT1G24881.1	44.44	43.14
AT1G24909.1	95.19	96.59
AT1G25054.1	29.81	31.01
AT1G25054.2	20.44	21.17
AT1G25055.1	44.44	43.14
AT1G25083.1	95.19	96.59
AT1G25145.1	20.5	21.17
AT1G25150.1	44.44	43.14
AT1G25155.1	95.19	96.59
AT1G25210.1	43.85	44.35
AT1G25210.2	51.6	52.44
AT1G25211.1	45.71	44.36
AT1G25220.1	48.81	47.67
AT1G25220.2	49.07	49.44
AT1G25230.1	46.06	46.06
AT1G25250.1	58.28	57.4
AT1G25260.1	51.83	50.67
AT1G25275.1	82.09	79.71
AT1G25275.2	69.01	70
AT1G25275.3	44.19	48.72
AT1G25280.1	51.69	51.07
AT1G25280.2	52.16	52.16
AT1G25280.3	59.31	59.31
AT1G25350.1	27.49	27.34
AT1G25350.2	27.78	27.93
AT1G25370.1	73.68	73.68
AT1G25380.1	42.94	41.13
AT1G25390.1	31.4	31.56
AT1G25400.1	54.83	56.58
AT1G25400.2	54.83	56.58
AT1G25420.1	43.91	43.63
AT1G25420.2	21.88	22.31
AT1G25420.3	47.79	47.41
AT1G25440.1	67.35	66.17
AT1G25450.1	54.04	52.74
AT1G25490.1	72.29	72.92
AT1G25520.1	15.28	14.89
AT1G25540.1	32.06	31.98
AT1G25540.2	38.38	38.5
AT1G25550.1	73.08	74.59
AT1G25560.1	44.9	43.26
AT1G25570.1	32.81	34.09
AT1G25580.1	20.96	20.91
AT1G25682.1	26.64	27.6
AT1G25988.1	27.74	27.39
AT1G26090.1	56.74	57.24
AT1G26110.1	56.27	55.76
AT1G26110.2	26.38	27.11
AT1G26150.1	63.21	63.51
AT1G26160.1	47.56	46.43
AT1G26180.1	39.93	40.36
AT1G26210.1	87.2	86.51
AT1G26220.1	13.59	13.16
AT1G26230.1	67.3	66.72
AT1G26230.2	44.68	44.17
AT1G26260.1	26.95	26.74
AT1G26260.2	26.95	26.74
AT1G26260.3	55.7	54.66
AT1G26270.1	39.87	39.87
AT1G26290.1	33.33	36
AT1G26300.1	40.74	40.33
AT1G26340.1	26.32	27.56
AT1G26440.1	46.88	45.05
AT1G26440.2	64.13	62.89
AT1G26440.3	65.44	63.57
AT1G26440.4	64.91	61.5
AT1G26450.1	24.71	25
AT1G26460.1	32.9	33.67
AT1G26470.1	84.67	84.67
AT1G26520.1	56.02	56.5
AT1G26550.1	28.12	30
AT1G26580.1	14.59	14.2
AT1G26620.1	41.56	41.26
AT1G26630.1	46	44.23
AT1G26630.2	75.37	72.14
AT1G26640.1	87.61	86.83
AT1G26660.1	95.45	97.67
AT1G26660.2	92.95	92.36
AT1G26665.1	47.27	46.43
AT1G26665.2	29.78	30.46
AT1G26670.1	47.44	46.58
AT1G26690.1	68.5	65.87
AT1G26740.1	22.05	22.05
AT1G26750.1	41.99	40.43
AT1G26760.1	79.3	79.81
AT1G26761.1	50.67	50.79
AT1G26770.1	54.24	53.78
AT1G26770.2	25.61	24.9
AT1G26800.1	41.62	44.09
AT1G26830.1	47.62	47.28
AT1G26850.1	31.33	31.02
AT1G26850.2	51.16	50.99
AT1G26850.3	37.1	36.01
AT1G26880.1	56.44	54.81
AT1G26880.2	33.73	32.94
AT1G26910.1	37.95	38.12
AT1G26920.1	31.82	32.43
AT1G26930.1	46.67	45.06
AT1G26940.1	36.24	36.56
AT1G27000.1	73.67	72.22
AT1G27020.1	27.83	30.28
AT1G27030.1	41.72	42.57
AT1G27050.1	32.99	33.68
AT1G27090.1	32.58	31.4
AT1G27100.1	54.14	56.54
AT1G27130.1	86.05	86.45
AT1G27150.1	40.13	39.78
AT1G27190.1	71.29	71.29
AT1G27210.1	54.72	54.81
AT1G27290.1	88.14	88.89
AT1G27290.2	88.14	88.89
AT1G27300.1	79.12	80.9
AT1G27310.1	86.73	86.73
AT1G27320.1	44.44	44.53
AT1G27330.1	6.9	6.56
AT1G27340.1	40.85	42.48
AT1G27350.1	100	98.44
AT1G27385.1	65.61	64.58
AT1G27385.2	44.15	42.78
AT1G27385.3	84.28	83.55
AT1G27385.4	66.41	65.89
AT1G27390.1	75.52	73.98
AT1G27400.1	65.56	63.87
AT1G27430.1	47.2	46.84
AT1G27435.1	100	98.68
AT1G27450.1	57.33	59.17
AT1G27450.2	51.5	49.43
AT1G27450.3	35.25	33.82
AT1G27460.1	27.92	28.55
AT1G27470.1	60.39	60.54
AT1G27480.1	48.9	48.08
AT1G27510.1	53.04	54.24
AT1G27520.1	15.22	15.05
AT1G27530.1	61.25	61.64
AT1G27540.1	38.65	38
AT1G27540.2	32.22	32.22
AT1G27565.1	100	100
AT1G27600.1	43.06	42.47
AT1G27600.2	43.06	42.47
AT1G27630.1	30.43	29.93
AT1G27650.1	79.31	79.86
AT1G27650.2	56.42	55.66
AT1G27680.1	23.82	24.25
AT1G27695.1	10.64	11.11
AT1G27695.2	10.64	11.11
AT1G27700.1	67.87	66.99
AT1G27730.1	68.14	68.47
AT1G27752.1	66.47	66.47
AT1G27752.2	40.56	40.5
AT1G27760.1	38.05	38.86
AT1G27760.2	36.78	37.32
AT1G27760.3	38.71	39.34
AT1G27770.1	34.61	34.54
AT1G27770.2	31.76	31.82
AT1G27840.1	59.31	59.04
AT1G27840.2	49.07	48.05
AT1G27840.3	57.98	58.9
AT1G27850.1	33.58	33.67
AT1G27930.1	28.11	27.34
AT1G27950.1	32.95	32.4
AT1G27970.1	16.98	16.51
AT1G27970.2	27.27	27.97
AT1G27980.1	55.43	54.83
AT1G28050.1	64.94	63.74
AT1G28060.1	45.09	45.75
AT1G28090.1	77.31	76.32
AT1G28090.2	57.52	56.83
AT1G28090.3	76.95	78.41
AT1G28120.1	40.54	40.4
AT1G28140.1	47.72	50.18
AT1G28150.1	73.33	69.72
AT1G28190.1	67.11	63.22
AT1G28200.1	50.4	50.81
AT1G28240.1	44.22	43.72
AT1G28280.1	73.3	73.53
AT1G28280.2	72.14	72.73
AT1G28290.1	95.62	96.68
AT1G28290.2	47.43	48
AT1G28320.1	35.53	36.47
AT1G28330.1	83.49	83.49
AT1G28330.2	70.09	71.3
AT1G28330.3	60.68	57.72
AT1G28330.4	88.07	88.07
AT1G28330.5	30.34	28.76
AT1G28340.1	30.56	29.76
AT1G28350.1	42.32	40.86
AT1G28370.1	11.38	11.88
AT1G28380.1	39.72	39.58
AT1G28390.1	41.82	43.16
AT1G28395.1	26.44	26.74
AT1G28395.2	26.44	26.74
AT1G28395.3	49.38	47.62
AT1G28395.4	3.61	3.66
AT1G28395.5	20.83	18.99
AT1G28400.1	77.01	77.61
AT1G28440.1	32.64	32.87
AT1G28480.1	82.03	78.95
AT1G28490.1	53.12	51.29
AT1G28490.2	45.21	45.21
AT1G28510.1	56.58	54.78
AT1G28520.1	54.85	55.53
AT1G28520.2	69.56	70.06
AT1G28540.1	92.31	89.36
AT1G28580.1	49.46	48.81
AT1G28580.2	55.7	56.62
AT1G28600.1	43.08	44.96
AT1G28600.2	64.29	64.73
AT1G28610.2	36.29	37.17
AT1G28960.2	50.36	50.18
AT1G28960.3	47.39	47.39
AT1G28960.4	50	50.18
AT1G28960.5	44.6	44.44
AT1G29030.1	39.14	39.51
AT1G29040.1	15.74	15.2
AT1G29040.2	17.22	16.32
AT1G29040.3	44.08	42.68
AT1G29040.4	15.74	15.2
AT1G29060.1	22.05	23.14
AT1G29070.1	49.66	50
AT1G29150.1	39.86	39.86
AT1G29160.1	25	24.7
AT1G29220.1	36.92	37.85
AT1G29220.2	30.93	31.6
AT1G29250.1	99.17	98.36
AT1G29260.1	49.85	48.51
AT1G29310.1	89.22	90
AT1G29320.1	46.5	46.71
AT1G29340.1	56.28	54.28
AT1G29350.1	53.3	52.24
AT1G29370.1	50.07	49.34
AT1G29390.1	77.27	77.98
AT1G29390.2	56	53.85
AT1G29395.1	37.67	38.36
AT1G29400.1	68.57	68.53
AT1G29400.2	68.19	68.15
AT1G29418.1	43.59	40.96
AT1G29470.1	75.93	75.1
AT1G29470.2	67.63	67.08
AT1G29530.1	61.06	61.33
AT1G29550.1	54.94	54.94
AT1G29560.1	56.5	55.91
AT1G29560.2	34.62	34.41
AT1G29590.1	46.67	46.49
AT1G29660.1	53.25	52.92
AT1G29670.1	33.53	34.46
AT1G29700.1	73.03	74.61
AT1G29750.2	35	33.96
AT1G29790.1	62.21	62.03
AT1G29790.2	58.24	59.25
AT1G29810.1	44.89	42.47
AT1G29820.1	36.54	35.38
AT1G29820.2	36.54	35.38
AT1G29850.1	80.18	82.41
AT1G29850.2	4.35	4.67
AT1G29850.3	86.96	91.6
AT1G29880.1	64.99	63.62
AT1G29890.1	57.86	56.44
AT1G29890.2	80.07	80.35
AT1G29900.1	41.33	41.57
AT1G29910.1	93.94	95.38
AT1G29920.1	76.08	76.38
AT1G29930.1	57.47	58.14
AT1G29940.1	42.42	42.62
AT1G29950.1	33.62	33.19
AT1G29950.2	51.06	50.63
AT1G29951.1	51.28	47.62
AT1G29952.1	0	0
AT1G29965.1	66.04	68.18
AT1G29970.1	28.48	27.22
AT1G29970.2	34.15	33.56
AT1G29980.1	55.53	55.77
AT1G29990.1	7.89	8.74
AT1G30000.1	47.38	46.46
AT1G30070.1	52.88	53.66
AT1G30070.2	44.91	45.12
AT1G30090.1	41.43	42.54
AT1G30110.1	46.95	47.53
AT1G30110.2	46.95	47.53
AT1G30120.1	37.31	37.31
AT1G30130.1	22.94	22.7
AT1G30130.2	22.7	22.61
AT1G30200.1	24.13	23.56
AT1G30200.2	41.18	41.29
AT1G30210.1	82.79	83.88
AT1G30210.2	82.14	83.22
AT1G30230.1	58.11	57.33
AT1G30230.2	33.06	31.89
AT1G30250.1	32.35	30.14
AT1G30260.1	81.32	82.22
AT1G30270.1	38.28	38.2
AT1G30280.1	58.41	60.6
AT1G30320.1	40.34	40
AT1G30330.1	25.11	25.43
AT1G30330.2	41.9	42.19
AT1G30360.1	62.48	60.56
AT1G30380.1	79.67	79.03
AT1G30400.1	52.77	53.07
AT1G30400.2	51.79	52.12
AT1G30410.1	40.41	39.81
AT1G30440.1	37.87	37.37
AT1G30460.1	43.96	45.02
AT1G30470.1	42.12	41.58
AT1G30470.2	43.95	44.18
AT1G30470.3	43.53	42.88
AT1G30480.1	76.62	76.19
AT1G30490.1	42.27	42.67
AT1G30510.1	41.69	41.93
AT1G30510.2	43.58	43.7
AT1G30510.3	39.86	40.69
AT1G30530.1	60.18	60.04
AT1G30580.1	36.06	37.3
AT1G30610.1	39.77	41.13
AT1G30610.2	41.84	42.89
AT1G30630.1	37.13	37.55
AT1G30640.1	50.37	51.31
AT1G30680.1	52.32	52.17
AT1G30690.1	81.69	83.33
AT1G30690.2	82.31	83.13
AT1G30810.1	26.65	26.39
AT1G30810.2	34.25	33.7
AT1G30820.1	30.48	29.82
AT1G30880.1	94.79	90.2
AT1G30910.1	33.44	33.44
AT1G30960.1	42.55	42.65
AT1G30970.1	62.57	61.65
AT1G30970.2	66.43	68.89
AT1G31070.1	50	48.98
AT1G31070.2	52	51.9
AT1G31130.1	78.28	78.28
AT1G31150.1	62.04	61.11
AT1G31160.1	93.82	90.76
AT1G31170.1	100	100
AT1G31170.2	94.21	95.8
AT1G31170.3	94.12	95.73
AT1G31170.4	84.82	86.63
AT1G31180.1	53.44	54.28
AT1G31190.1	43.05	42.59
AT1G31230.1	31.72	31.43
AT1G31280.1	69.37	69.51
AT1G31310.1	42.82	43.05
AT1G31330.1	39.5	41.36
AT1G31340.1	65.65	62.77
AT1G31350.1	69.04	69.04
AT1G31360.1	39.34	40.03
AT1G31360.2	37.17	38.46
AT1G31410.1	75.05	74.75
AT1G31420.1	48.2	48.12
AT1G31420.2	44.77	45.23
AT1G31440.1	42.89	42.59
AT1G31540.2	55.06	55.45
AT1G31550.1	55.15	54.04
AT1G31580.1	79.66	79.66
AT1G31600.1	24.94	24.64
AT1G31600.2	45.95	45.4
AT1G31600.3	24.94	24.64
AT1G31650.1	30.16	29.62
AT1G31660.1	58	58.55
AT1G31690.1	69.17	68.62
AT1G31730.1	30.21	30.21
AT1G31780.1	38.33	38.37
AT1G31800.1	44.43	44.96
AT1G31810.1	39.5	39.21
AT1G31812.1	66.3	67.78
AT1G31817.1	82.93	81.23
AT1G31850.1	41.81	42.25
AT1G31850.2	41.81	42.25
AT1G31850.3	41.81	42.25
AT1G31860.1	43.12	44.96
AT1G31870.1	38.76	38.83
AT1G31870.2	38.55	38.71
AT1G31910.1	45.49	44.4
AT1G31910.2	68.49	68.97
AT1G31920.1	26.99	26.59
AT1G31930.1	38.9	39.67
AT1G31930.2	38.9	39.67
AT1G31930.3	38.9	39.67
AT1G31940.1	53.95	56.16
AT1G31970.1	50.2	49.02
AT1G32050.1	41.73	42.57
AT1G32060.1	34.97	35.15
AT1G32070.1	35.82	37.5
AT1G32070.2	40.23	41.47
AT1G32070.3	70.23	69.43
AT1G32080.1	56.08	54.56
AT1G32100.1	65.36	67.11
AT1G32130.1	59.39	59.04
AT1G32130.2	80.31	80.49
AT1G32160.1	39.45	40.57
AT1G32170.1	41.18	40.92
AT1G32200.1	51.13	51.25
AT1G32200.2	47.95	48.39
AT1G32210.1	66.06	65.45
AT1G32220.1	64.55	64.77
AT1G32230.1	71.94	70.18
AT1G32230.2	51.08	49.83
AT1G32230.3	46.75	45.49
AT1G32240.1	46.52	45.51
AT1G32260.1	47.46	47.73
AT1G32310.1	97.12	98.06
AT1G32340.1	56.55	55.81
AT1G32360.1	14.67	14.36
AT1G32400.1	52.03	50.54
AT1G32400.2	52.03	50.54
[truncated: 13,605 more rows]

## Sheet: F4
F4 Shoot Control vs. Shoot Salt PPV, 3’ UTR
transcript	sensitivity	PPV
AT1G01020.1	97.69	97.69
AT1G01020.2	42.25	41.96
AT1G01030.1	82.61	85.07
AT1G01040.1	100	100
AT1G01040.2	100	100
AT1G01050.1	85	80.95
AT1G01080.1	67.86	69.09
AT1G01080.2	67.86	69.09
AT1G01090.1	64.18	64.18
AT1G01100.1	98.36	95.24
AT1G01100.2	98.53	95.71
AT1G01100.3	98.36	95.24
AT1G01100.4	98.36	95.24
AT1G01120.1	100	100
AT1G01140.1	56.34	57.14
AT1G01140.2	69.01	69.01
AT1G01140.3	69.01	69.01
AT1G01160.1	92.75	96.97
AT1G01160.2	92.75	96.97
AT1G01170.1	0	0
AT1G01170.2	66	64.71
AT1G01210.1	72.58	76.27
AT1G01220.1	67.74	72.41
AT1G01230.1	100	98.41
AT1G01240.1	100	100
AT1G01240.2	100	100
AT1G01240.3	100	100
AT1G01290.1	63.22	62.5
AT1G01290.2	75.44	70.49
AT1G01300.1	98.77	100
AT1G01320.1	35.65	35.04
AT1G01320.2	27.86	28.89
AT1G01350.1	64.18	66.67
AT1G01360.1	0	0
AT1G01430.1	69.05	64.44
AT1G01440.1	100	100
AT1G01470.1	93.18	89.13
AT1G01490.1	100	100
AT1G01490.2	100	100
AT1G01500.1	23.42	23.21
AT1G01510.1	47.14	49.25
AT1G01540.1	83.78	84.24
AT1G01540.2	98.97	100
AT1G01550.1	90	90
AT1G01550.2	90	90
AT1G01610.1	98.89	100
AT1G01620.1	49.55	50.93
AT1G01620.2	49.55	50.93
AT1G01630.1	97.14	97.14
AT1G01710.1	41.31	42.27
AT1G01730.1	100	100
AT1G01770.1	27.06	27.06
AT1G01780.1	100	100
AT1G01790.1	100	100
AT1G01800.1	90.91	90.91
AT1G01800.2	90.91	90.91
AT1G01820.1	50.75	48.57
AT1G01830.1	100	100
AT1G01830.2	100	100
AT1G01830.3	100	100
AT1G01840.1	91.76	90.7
AT1G01860.1	14.13	14.44
AT1G01910.1	94.67	94.67
AT1G01910.2	29.31	28.1
AT1G01910.3	16.96	17.47
AT1G01910.4	61.9	62.9
AT1G01910.5	29.31	28.1
AT1G01920.2	78.57	76.74
AT1G01930.1	38.6	39.29
AT1G01940.1	37.93	38.6
AT1G01950.1	100	98.44
AT1G01950.2	100	98.44
AT1G01950.3	100	98.44
AT1G01960.1	57.33	56.58
AT1G01970.1	46.15	42.86
AT1G01990.1	93.94	93.94
AT1G02000.1	84	82.89
AT1G02020.1	80.65	83.33
AT1G02020.2	43.52	44.44
AT1G02050.1	100	100
AT1G02080.1	100	100
AT1G02080.2	100	100
AT1G02090.1	0	0
AT1G02090.2	98.85	100
AT1G02090.3	82.25	81.97
AT1G02100.1	36.44	36.13
AT1G02100.2	12.96	12.61
AT1G02100.3	54.65	55.29
AT1G02110.1	100	100
AT1G02120.1	52.63	55.56
AT1G02130.1	48.75	49.37
AT1G02140.1	90.8	90.8
AT1G02145.1	100	100
AT1G02145.2	100	100
AT1G02145.3	100	100
AT1G02145.4	100	100
AT1G02150.1	29.63	32.65
AT1G02160.1	83.33	80.88
AT1G02160.2	100	100
AT1G02170.1	100	100
AT1G02205.1	94.12	91.95
AT1G02205.2	94.32	91.21
AT1G02205.3	100	100
AT1G02270.1	100	100
AT1G02280.1	95.71	95.71
AT1G02280.2	95.77	95.77
AT1G02300.1	100	100
AT1G02305.1	5.36	5.26
AT1G02330.1	100	100
AT1G02335.1	100	100
AT1G02410.1	35.9	37.84
AT1G02450.1	100	100
AT1G02475.1	98.44	98.44
AT1G02500.1	100	100
AT1G02500.2	100	100
AT1G02560.1	81	77.88
AT1G02610.1	100	100
AT1G02660.1	67.5	65.85
AT1G02680.1	22.43	20.17
AT1G02730.1	64.29	69.23
AT1G02750.1	98.04	96.15
AT1G02750.2	95.74	100
AT1G02780.1	48.45	46.53
AT1G02840.1	98.61	94.67
AT1G02840.2	86.79	85.58
AT1G02840.3	98.61	100
AT1G02860.1	100	100
AT1G02870.1	48.39	46.88
AT1G02880.3	87.38	87.38
AT1G02880.4	87.38	87.38
AT1G02890.1	100	100
AT1G02890.2	100	100
AT1G02910.1	100	100
AT1G02920.1	84.38	78.26
AT1G02930.1	100	100
AT1G02930.2	100	100
AT1G02960.1	52.78	46.34
AT1G02960.2	52.78	46.34
AT1G02960.3	37.61	41.12
AT1G02990.1	62.37	62.16
AT1G02990.2	54.21	54.21
AT1G02990.3	54.21	54.21
AT1G03030.1	66.3	69.66
AT1G03040.1	49.57	47.54
AT1G03040.2	49.57	47.54
AT1G03080.1	66.15	71.67
AT1G03090.1	77.88	78.57
AT1G03090.2	66.07	66.07
AT1G03130.1	28.79	28.36
AT1G03140.1	100	100
AT1G03150.1	100	100
AT1G03160.1	100	100
AT1G03160.2	40.81	42.52
AT1G03220.1	32.43	33.33
AT1G03230.1	100	100
AT1G03250.1	66.67	76.67
AT1G03250.2	100	100
AT1G03280.1	40.82	39.22
AT1G03290.1	NA	NA
AT1G03290.2	100	100
AT1G03330.1	100	100
AT1G03350.1	75	81.36
AT1G03360.1	100	100
AT1G03365.1	69.81	71.15
AT1G03370.1	66.1	64.46
AT1G03380.1	62.03	61.64
AT1G03400.1	40	37.84
AT1G03410.1	98.15	97.25
AT1G03430.1	41.77	37.5
AT1G03470.1	50.98	53.06
AT1G03470.2	50.98	53.06
AT1G03475.1	73.33	76.39
AT1G03530.1	100	100
AT1G03560.1	43.82	42.86
AT1G03590.1	100	100
AT1G03600.1	50	49.15
AT1G03610.1	71.43	72.73
AT1G03630.1	97.67	97.67
AT1G03630.2	97.67	97.67
AT1G03680.1	0	0
AT1G03740.1	97.56	94.12
AT1G03740.2	72.22	70.27
AT1G03760.1	100	100
AT1G03770.1	100	100
AT1G03780.1	56.03	57.02
AT1G03780.2	50	53.85
AT1G03780.3	100	100
AT1G03820.1	100	100
AT1G03830.1	100	100
AT1G03830.2	91.18	88.57
AT1G03860.1	72.28	78.49
AT1G03860.2	72.28	78.49
AT1G03860.3	72.28	78.49
AT1G03870.1	100	100
AT1G03900.1	71.95	69.41
AT1G03910.2	79.17	81.69
AT1G03930.1	100	100
AT1G03950.1	65.67	65.67
AT1G03970.1	85.71	83.08
AT1G04040.1	0	0
AT1G04070.1	31.96	32.29
AT1G04080.1	39.06	39.68
AT1G04080.2	39.06	39.68
AT1G04080.3	31.87	33.33
AT1G04120.1	70.63	70.31
AT1G04140.1	89.44	88.19
AT1G04140.2	96.55	95.89
AT1G04170.1	20.34	21.43
AT1G04190.1	13.11	14.29
AT1G04200.1	100	100
AT1G04230.1	74.53	76.7
AT1G04240.1	72.58	74.38
AT1G04250.1	100	100
AT1G04260.1	93.75	96.15
AT1G04270.1	94.12	95.24
AT1G04270.2	94.12	95.24
AT1G04280.1	16.18	16.42
AT1G04290.1	100	100
AT1G04300.1	74	68.52
AT1G04300.2	74	68.52
AT1G04300.3	74	68.52
AT1G04300.4	91.78	89.33
AT1G04340.1	21.62	21.92
AT1G04350.1	95.71	100
AT1G04400.1	92.73	87.93
AT1G04400.2	94.34	90.91
AT1G04410.1	73.21	79.61
AT1G04420.1	83.33	84.75
AT1G04430.1	100	100
AT1G04430.2	100	100
AT1G04440.1	92.5	92.5
AT1G04480.1	46.48	44
AT1G04510.1	33.33	33.9
AT1G04510.2	33.33	33.9
AT1G04520.1	88.89	96
AT1G04530.1	29.76	28.74
AT1G04550.1	47.37	47.79
AT1G04550.2	71.03	73.79
AT1G04590.1	84.48	84.48
AT1G04590.2	84.48	84.48
AT1G04620.1	100	97.56
AT1G04630.1	86.21	87.72
AT1G04635.1	100	100
AT1G04640.1	100	100
AT1G04680.1	92.68	93.83
AT1G04690.1	95.33	96.23
AT1G04710.1	100	100
AT1G04750.1	69.7	70.23
AT1G04750.2	26.37	24.74
AT1G04770.1	100	100
AT1G04780.1	48.39	48.39
AT1G04790.1	100	100
AT1G04800.1	94.64	94.64
AT1G04810.1	93.55	96.67
AT1G04820.1	11.76	12.9
AT1G04830.1	100	100
AT1G04850.1	81.48	83.02
AT1G04860.1	78.75	76.83
AT1G04870.1	89.02	92.41
AT1G04870.2	89.02	92.41
AT1G04900.1	92.86	92.04
AT1G04910.1	97.5	97.5
AT1G04940.1	34.15	33.33
AT1G04950.1	83.46	82.81
AT1G04950.2	83.46	82.81
AT1G04950.3	83.46	82.81
AT1G04960.1	69.01	71.01
AT1G04960.2	69.01	71.01
AT1G04980.1	100	100
AT1G04985.1	65.22	63.38
AT1G04990.2	100	100
AT1G05010.1	98.81	98.81
AT1G05060.1	84.93	84.93
AT1G05070.1	100	100
AT1G05120.1	45.95	49.28
AT1G05140.1	100	100
AT1G05150.1	73.02	70.77
AT1G05180.1	57.53	55.26
AT1G05180.2	57.53	55.26
AT1G05180.3	75.36	76.47
AT1G05190.1	47.73	42.86
AT1G05205.1	87.5	88.73
AT1G05270.1	94.23	100
AT1G05320.1	100	100
AT1G05320.2	100	100
AT1G05320.3	100	100
AT1G05350.1	29.41	28.99
AT1G05380.1	28.97	29.79
AT1G05380.2	28.97	29.79
AT1G05385.1	100	100
AT1G05410.1	100	100
AT1G05410.2	100	100
AT1G05430.1	100	100
AT1G05460.1	87.14	87.14
AT1G05500.1	83.87	82.11
AT1G05560.1	91.8	88.89
AT1G05570.1	14	12.5
AT1G05570.2	14	12.5
AT1G05590.1	98.48	100
AT1G05630.1	89.06	89.06
AT1G05630.2	92.31	90.91
AT1G05720.1	6.76	7.69
AT1G05780.1	38.81	36.11
AT1G05790.1	22.22	21.62
AT1G05790.2	72.22	68.42
AT1G05805.1	69.57	70.33
AT1G05810.1	100	100
AT1G05830.1	99.04	100
AT1G05830.2	63.55	67.33
AT1G05840.1	0	0
AT1G05850.1	70.59	73.47
AT1G05870.1	21.33	23.19
AT1G05870.2	90.87	90
AT1G05870.3	99.43	99.43
AT1G05870.4	89.74	88.98
AT1G05890.1	37.19	39.47
AT1G05890.2	58.23	60.53
AT1G05910.1	20	19.15
AT1G05940.1	13.7	15.38
AT1G05960.1	53.37	56.89
AT1G05960.2	53.37	56.89
AT1G06010.1	72.22	74.29
AT1G06040.1	60	62.96
AT1G06040.2	90.48	90.48
AT1G06060.1	52.25	49.15
AT1G06070.1	100	100
AT1G06110.1	100	100
AT1G06130.1	88.24	91.46
AT1G06130.2	88.24	91.46
AT1G06149.1	41.17	40.78
AT1G06150.2	45.07	43.84
AT1G06190.1	85.71	88.89
AT1G06190.2	98.95	98.95
AT1G06200.1	58.82	58.14
AT1G06210.1	35.9	36.36
AT1G06210.2	75	75
AT1G06220.1	72.45	69.61
AT1G06220.2	72.45	69.61
AT1G06230.1	15.82	17.24
AT1G06230.2	15.82	17.24
AT1G06230.3	71.03	69.09
AT1G06290.1	90.8	89.77
AT1G06360.1	75.71	76.81
AT1G06380.1	29.03	30
AT1G06390.1	93	93
AT1G06390.2	81.72	84.44
AT1G06400.1	92.86	97.5
AT1G06410.1	62.5	63.69
AT1G06420.1	26.17	26.67
AT1G06420.2	26.17	26.67
AT1G06430.1	100	100
AT1G06460.1	55.26	58.33
AT1G06470.1	92.65	90
AT1G06470.2	45.45	50
AT1G06475.1	100	100
AT1G06500.1	80	80
AT1G06500.2	100	100
AT1G06500.3	80	80
AT1G06500.4	100	100
AT1G06510.1	74.44	70.53
AT1G06515.1	0	0
AT1G06515.2	0	0
AT1G06550.1	61.67	64.91
AT1G06570.1	100	100
AT1G06570.2	87.34	87.34
AT1G06640.1	100	100
AT1G06640.2	43.95	43.4
AT1G06640.3	24.35	24.14
AT1G06645.1	100	100
AT1G06650.1	53.76	54.95
AT1G06650.2	29.41	28.85
AT1G06670.1	60	65.52
AT1G06680.1	94.59	95.89
AT1G06680.2	92.65	92.65
AT1G06690.1	100	100
AT1G06700.1	26.37	28.92
AT1G06700.2	26.6	29.76
AT1G06720.1	100	100
AT1G06760.1	100	100
AT1G06790.1	98.04	100
AT1G06820.1	100	100
AT1G06830.1	60.78	70.45
AT1G06850.1	24	24.32
AT1G06850.2	72.73	73.95
AT1G06890.1	0	0
AT1G06890.2	0	0
AT1G06890.3	100	100
AT1G06900.1	100	100
AT1G06910.1	12.2	11.76
AT1G06950.1	32.61	30
AT1G06960.1	73.21	77.36
AT1G06960.2	65.08	63.08
AT1G06960.3	73.21	77.36
AT1G07000.1	42.86	44.12
AT1G07010.1	63.44	64.13
AT1G07010.2	63.44	64.13
AT1G07010.3	90.59	93.9
AT1G07020.1	100	100
AT1G07030.1	8.82	8.96
AT1G07040.1	96.91	95.92
AT1G07050.1	100	100
AT1G07070.1	100	100
AT1G07080.1	98	97.03
AT1G07110.1	69.23	71.43
AT1G07135.1	100	100
AT1G07140.1	63.51	65.69
AT1G07170.1	93.18	97.67
AT1G07170.2	100	100
AT1G07170.3	97.67	97.67
AT1G07200.1	76.6	77.42
AT1G07210.1	40.4	40.82
AT1G07220.1	30.61	30
AT1G07230.1	81.93	81.93
AT1G07250.1	100	100
AT1G07280.1	100	98.59
AT1G07280.2	56.9	56.9
AT1G07280.3	100	98.59
AT1G07310.1	55.68	58.33
AT1G07320.1	53.7	59.18
AT1G07320.2	65.05	68.37
AT1G07320.3	100	100
AT1G07320.4	51.52	51.52
AT1G07350.1	81.72	80.85
AT1G07350.2	53.38	51.39
AT1G07360.1	68.63	63.64
AT1G07370.1	56.52	56.52
AT1G07400.1	66.67	63.64
AT1G07420.1	56.1	54.76
AT1G07420.2	56.1	54.76
AT1G07430.1	48.57	49.51
AT1G07440.1	88.1	92.5
AT1G07440.2	97.16	97.71
AT1G07470.1	70.13	70.13
AT1G07480.1	95.07	93.39
AT1G07480.2	95.07	93.39
AT1G07510.1	15.09	15.69
AT1G07530.1	100	100
AT1G07590.1	100	100
AT1G07610.1	18.07	18.29
AT1G07615.1	100	100
AT1G07630.1	97.5	96.3
AT1G07640.1	100	100
AT1G07640.2	100	100
AT1G07640.3	100	100
AT1G07650.1	98.85	98.85
AT1G07650.2	53.06	55.32
AT1G07660.1	100	100
AT1G07660.2	100	100
AT1G07670.1	85.71	87.8
AT1G07700.1	42.67	43.24
AT1G07700.2	76.14	80.95
AT1G07700.3	42.67	43.24
AT1G07720.1	41.94	41.05
AT1G07770.1	64.06	70.69
AT1G07770.2	64.06	70.69
AT1G07780.1	89.74	86.42
AT1G07780.2	89.74	86.42
AT1G07780.3	89.74	86.42
AT1G07780.4	39.6	40.69
AT1G07780.5	18.18	19.15
AT1G07790.1	100	100
AT1G07810.1	70	71.19
AT1G07820.1	59.38	58.46
AT1G07820.2	97.01	98.48
AT1G07830.1	77.91	72.83
AT1G07840.1	31.33	30.95
AT1G07840.2	31.33	33.33
AT1G07840.3	44.78	41.38
AT1G07890.1	27.78	28.57
AT1G07890.2	27.78	28.57
AT1G07890.3	27.78	28.57
AT1G07890.4	27.78	28.57
AT1G07890.5	27.78	28.57
AT1G07890.6	30.69	29.25
AT1G07890.7	27.78	28.57
AT1G07890.8	27.78	28.57
AT1G07920.1	100	100
AT1G07930.1	100	100
AT1G07930.2	100	100
AT1G07940.1	94.4	92.19
AT1G07940.2	94.4	92.19
AT1G07950.1	25	24.73
AT1G07960.1	0	0
AT1G07960.2	0	0
AT1G07960.3	0	0
AT1G07980.1	100	99.12
AT1G07990.1	41.79	37.84
AT1G08000.1	100	98.73
AT1G08000.2	100	98.73
AT1G08010.1	43.56	45.36
AT1G08030.1	100	100
AT1G08040.1	74.47	74.47
AT1G08040.2	74.47	74.47
AT1G08110.1	75.56	73.91
AT1G08110.2	75.56	73.91
AT1G08110.3	75.56	73.91
AT1G08110.4	75.56	73.91
AT1G08125.1	100	100
AT1G08125.2	100	100
AT1G08125.3	100	100
AT1G08130.1	100	100
AT1G08160.1	97.96	97.96
AT1G08180.1	90.91	85.11
AT1G08190.1	97.7	97.7
AT1G08200.1	25.83	25
AT1G08230.2	100	100
AT1G08315.1	63.27	64.58
AT1G08360.1	94.12	96.97
AT1G08370.1	100	100
AT1G08380.1	70.69	69.49
AT1G08410.1	42.22	41.3
AT1G08420.1	78.71	73.94
AT1G08420.2	82.16	80.1
AT1G08450.1	12.28	12.96
AT1G08450.2	100	100
AT1G08450.3	76.92	79.37
AT1G08460.1	58	59.18
AT1G08465.1	100	100
AT1G08470.1	100	100
AT1G08480.1	72.46	79.37
AT1G08490.1	81.42	79.31
AT1G08510.1	94.29	93.62
AT1G08520.1	100	100
AT1G08530.1	97.87	100
AT1G08540.1	100	100
AT1G08550.1	85.37	89.74
AT1G08550.2	85.37	89.74
AT1G08560.1	100	100
AT1G08570.1	62.42	62.42
AT1G08570.2	62.42	62.42
AT1G08570.3	62.42	62.42
AT1G08570.4	62.42	62.42
AT1G08580.1	83.33	78.95
AT1G08600.1	100	100
AT1G08600.2	100	100
AT1G08600.3	100	100
AT1G08600.4	100	100
AT1G08610.1	92.5	90.24
AT1G08620.1	58.18	59.81
AT1G08620.2	79.46	76.07
AT1G08640.1	64.81	69.31
AT1G08650.1	80.89	76.97
AT1G08650.2	80.26	74.39
AT1G08660.1	100	100
AT1G08660.2	85.03	86.06
AT1G08680.1	75.13	73.27
AT1G08680.2	75.13	73.27
AT1G08680.3	75.13	73.27
AT1G08680.4	98.48	100
AT1G08700.1	100	100
AT1G08710.1	100	100
AT1G08710.2	100	100
AT1G08720.1	97.01	95.59
AT1G08760.1	100	100
AT1G08780.1	100	100
AT1G08800.1	47.58	45.38
AT1G08800.2	47.58	45.38
AT1G08810.1	20.55	22.39
AT1G08810.2	31.94	33.82
AT1G08820.1	16.85	18.29
AT1G08820.2	16.85	18.29
AT1G08830.1	51.28	51.28
AT1G08830.2	52.63	51.28
AT1G08845.1	100	100
AT1G08880.1	96.92	96.92
AT1G08890.1	100	100
AT1G08910.1	99.18	99.18
AT1G08930.1	69.23	68.35
AT1G08930.2	91.3	91.3
AT1G08940.1	100	100
AT1G08970.1	100	100
AT1G08970.2	87.88	87.88
AT1G08970.3	53.06	50.49
AT1G08970.4	83.84	84.69
AT1G08980.1	71.93	68.33
AT1G09010.1	100	100
AT1G09020.1	28.81	33.33
AT1G09060.1	87.5	87.5
AT1G09060.2	87.5	87.5
AT1G09060.3	87.5	87.5
AT1G09070.1	100	100
AT1G09100.1	100	100
AT1G09130.1	97.98	100
AT1G09130.2	100	100
AT1G09130.3	100	100
AT1G09140.1	72.07	74.07
AT1G09140.2	40.69	41.48
AT1G09150.1	98.8	100
AT1G09160.1	38.81	38.81
AT1G09160.2	52.73	53.21
AT1G09190.1	100	100
AT1G09200.1	0	0
AT1G09210.1	99.19	99.19
AT1G09250.1	100	100
AT1G09270.1	62.12	62.12
AT1G09270.2	40.21	38.24
AT1G09270.3	62.12	62.12
AT1G09290.1	100	100
AT1G09300.2	80.77	75
AT1G09310.1	47.22	48.57
AT1G09320.1	67.83	69.03
AT1G09330.1	72.37	70.51
AT1G09340.1	61.82	57.63
AT1G09415.1	51.06	51.06
AT1G09430.1	100	100
AT1G09470.1	100	97.83
AT1G09470.2	100	97.83
AT1G09490.1	100	100
AT1G09490.2	100	100
AT1G09560.1	86.84	91.67
AT1G09570.1	55.07	52.78
AT1G09570.2	55.07	52.78
AT1G09575.1	100	100
AT1G09580.1	100	100
AT1G09590.1	55.1	60
AT1G09620.1	82.18	83.84
AT1G09630.1	100	100
AT1G09640.1	96.55	97.39
AT1G09640.2	100	98.11
AT1G09645.1	100	100
AT1G09660.1	95.18	96.34
AT1G09660.2	100	99.22
AT1G09690.1	71.88	76.67
AT1G09700.1	64.62	67.74
AT1G09730.1	99.17	99.17
AT1G09730.2	99.17	99.17
AT1G09740.1	41.03	39.51
AT1G09750.1	100	100
AT1G09760.1	60	61.06
AT1G09770.1	54.43	57.33
AT1G09780.1	100	100
AT1G09794.1	100	100
AT1G09795.1	93.94	89.86
AT1G09815.1	38.1	36.36
AT1G09830.1	100	100
AT1G09840.1	100	100
AT1G09840.2	100	100
AT1G09840.3	100	100
AT1G09840.4	100	100
AT1G09840.5	38.2	38.64
AT1G09840.6	38.2	38.64
AT1G09850.1	100	100
AT1G09870.1	30.77	31.58
AT1G09920.1	96.08	92.45
AT1G09940.1	100	100
AT1G09970.1	75	76.83
AT1G09970.2	36.62	34.67
AT1G10020.1	26.45	25.6
AT1G10060.1	77.93	78.47
AT1G10060.2	78.16	77.27
AT1G10090.1	88.37	83.52
AT1G10120.1	79.66	78.33
AT1G10150.1	65.67	67.69
AT1G10170.1	69.72	69.72
AT1G10200.1	38.14	39.78
AT1G10230.1	93.22	91.67
AT1G10270.1	100	100
AT1G10290.1	87.39	86.61
AT1G10310.1	10.81	10.81
AT1G10350.1	29.31	29.31
AT1G10360.1	66.07	68.52
AT1G10390.1	58.46	50
AT1G10390.2	58.46	50
AT1G10410.1	59.52	59.52
AT1G10430.1	68.12	64.38
AT1G10450.1	91.3	90.32
AT1G10470.1	87.06	85.06
AT1G10500.1	33.33	32
AT1G10510.1	98.51	100
AT1G10522.1	21.31	21.67
AT1G10522.2	100	96.55
AT1G10550.1	100	100
AT1G10570.1	100	100
AT1G10570.2	100	100
AT1G10580.1	72.5	65.91
AT1G10590.1	92.86	96.81
AT1G10590.2	49.49	52.69
AT1G10590.3	49	52.69
AT1G10600.1	73.53	74.26
AT1G10600.2	73.53	74.26
AT1G10600.3	73.53	74.26
AT1G10610.1	86.59	86.59
AT1G10630.1	98.35	98.35
AT1G10650.1	100	100
AT1G10650.2	100	100
AT1G10660.1	66.97	67.59
AT1G10660.2	66.97	67.59
AT1G10660.3	66.97	67.59
AT1G10660.4	66.97	67.59
AT1G10670.1	45.1	45.1
AT1G10670.2	45.1	45.1
AT1G10670.3	45.1	45.1
AT1G10670.4	19.67	18.18
AT1G10700.1	97.44	100
AT1G10720.1	63	63.64
AT1G10740.4	100	100
AT1G10760.1	38	38.78
AT1G10820.2	61.31	62.05
AT1G10830.1	57.45	57.45
AT1G10830.2	95.69	94.57
AT1G10840.1	98.8	100
AT1G10840.2	98.8	100
AT1G10850.1	94.19	92.05
AT1G10865.1	45.45	46.05
AT1G10865.2	55.56	53.92
AT1G10870.1	91.11	92.13
AT1G10890.1	97.1	97.1
AT1G10900.1	100	100
AT1G10910.1	100	100
AT1G10930.1	100	93.18
AT1G10940.1	70	70
AT1G10940.2	65.82	65.82
AT1G10950.1	96.03	94.53
AT1G10960.1	100	100
AT1G11020.1	5.08	5.08
AT1G11170.1	100	100
AT1G11210.1	37.29	35.48
AT1G11220.1	100	100
AT1G11240.1	100	100
AT1G11260.1	100	100
AT1G11280.1	72.73	76.19
AT1G11280.2	72.73	76.19
AT1G11280.3	72.73	76.19
AT1G11280.4	72.73	76.19
AT1G11310.1	100	100
AT1G11310.2	67	69.39
AT1G11330.1	100	100
AT1G11330.2	97.78	97.78
AT1G11350.1	100	100
AT1G11360.1	45.61	46.02
AT1G11360.2	53.1	51.28
AT1G11360.3	80.61	80.12
AT1G11360.4	84.35	82.91
AT1G11380.1	100	100
AT1G11400.1	93.42	95.95
AT1G11400.2	93.42	95.95
AT1G11400.3	93.42	95.95
AT1G11430.1	82.86	85.29
AT1G11440.1	97.92	97.92
AT1G11475.1	8.45	8.45
AT1G11480.1	78.57	83.33
AT1G11480.2	69.7	69.7
AT1G11530.1	66.07	67.27
AT1G11580.1	100	100
AT1G11630.1	100	100
AT1G11650.1	76.47	80.25
AT1G11650.2	93.06	91.78
AT1G11660.1	98.41	98.41
AT1G11680.1	20.45	18.37
AT1G11700.1	28.26	25
AT1G11720.1	100	100
AT1G11720.2	100	100
AT1G11750.1	31.48	31.13
AT1G11750.2	94.92	94.07
AT1G11755.1	62.38	63.64
AT1G11790.1	48.72	48.72
AT1G11820.1	79.45	78.38
AT1G11820.2	100	100
AT1G11840.1	61	61.62
AT1G11840.2	27	25.47
AT1G11840.3	60	60
AT1G11840.4	60	60
AT1G11840.5	80	78.87
AT1G11840.6	96.75	97.54
AT1G11850.1	73.17	69.77
AT1G11850.2	100	99.02
AT1G11850.3	8.75	8.24
AT1G11850.4	73.17	69.77
AT1G11860.1	64.81	60.34
AT1G11860.2	64.81	60.34
AT1G11860.3	100	100
AT1G11870.1	100	100
AT1G11870.2	100	100
AT1G11870.3	38.61	38.61
AT1G11890.1	26.44	28.05
AT1G11905.1	89.32	91.09
AT1G11910.1	71.56	78
AT1G11930.1	96.15	97.4
AT1G11930.2	96.91	97.92
AT1G11960.1	100	100
AT1G12000.1	88.31	85
AT1G12020.1	98.15	98.15
AT1G12050.1	39.19	40.28
AT1G12080.1	91.84	90
AT1G12080.2	69.23	67.92
AT1G12090.1	88.24	87.38
AT1G12120.1	100	100
AT1G12140.1	82.06	79.22
AT1G12140.2	84.31	87.76
AT1G12230.1	38.38	38.78
AT1G12230.2	47.41	47.83
AT1G12240.1	62.96	60.71
AT1G12244.1	100	100
AT1G12250.1	63.93	65
AT1G12250.2	63.93	65
AT1G12270.1	71.93	73.21
AT1G12310.1	57.14	57.66
AT1G12320.1	100	100
AT1G12330.1	100	100
AT1G12360.1	12	11.84
AT1G12410.1	52.17	52.17
AT1G12420.1	86.73	89.09
AT1G12430.1	7.95	8.64
AT1G12430.2	7.95	8.64
AT1G12440.1	77.94	77.94
AT1G12440.2	98.51	97.06
AT1G12470.1	50	47.54
AT1G12500.1	86.21	89.93
AT1G12520.1	100	94.12
AT1G12520.2	100	94.12
AT1G12520.3	100	94.12
AT1G12530.1	100	100
AT1G12580.1	72.5	69.05
AT1G12650.1	78.18	75.44
AT1G12650.2	78.18	75.44
AT1G12650.3	78.18	75.44
AT1G12650.4	16.83	17.17
AT1G12680.1	50	52.17
AT1G12750.1	84	72.41
AT1G12750.2	84	72.41
AT1G12750.3	84	72.41
AT1G12760.1	23.33	23.93
AT1G12760.2	30	31.3
AT1G12770.1	100	100
AT1G12780.1	55.71	63.93
AT1G12800.1	100	100
AT1G12810.1	100	100
AT1G12810.2	100	100
AT1G12820.1	100	100
AT1G12830.1	0	0
AT1G12840.1	78.95	78.95
AT1G12850.1	60	60.67
AT1G12860.1	100	100
AT1G12880.1	94.12	100
AT1G12900.1	44.44	48.28
AT1G12900.2	98	100
AT1G12900.3	98	100
AT1G12900.4	100	100
AT1G12910.1	68.57	71.64
AT1G12920.1	100	98.46
AT1G12930.1	92.65	94.03
AT1G12970.1	100	100
AT1G13000.1	50	53.57
AT1G13000.2	50	53.57
AT1G13020.1	75.2	76.42
AT1G13030.1	100	100
AT1G13060.1	69.84	68.75
AT1G13060.2	70.31	69.23
AT1G13090.1	0	0
AT1G13110.1	98.25	100
AT1G13120.1	100	100
AT1G13160.1	65.38	56.67
AT1G13170.1	100	100
AT1G13170.2	93.33	89.36
AT1G13190.1	100	100
AT1G13210.1	98.89	100
AT1G13220.1	100	100
AT1G13220.2	92.42	96.83
AT1G13245.1	23.2	23.39
AT1G13250.1	25.49	23.21
AT1G13260.1	92.93	92
AT1G13270.1	100	100
AT1G13270.2	50.62	50
AT1G13280.1	100	100
AT1G13320.1	92.96	92.96
AT1G13320.2	96.67	95.87
AT1G13320.3	94.37	93.06
AT1G13350.1	100	100
AT1G13350.2	100	100
AT1G13360.1	92.05	87.1
AT1G13360.2	100	100
AT1G13360.3	100	100
AT1G13380.1	100	100
AT1G13390.2	86.92	86.11
AT1G13440.1	63.29	56.18
AT1G13440.2	91.14	93.51
AT1G13450.1	96.47	97.65
AT1G13450.2	96.47	97.65
AT1G13450.3	57.14	55.48
AT1G13460.1	71.15	67.27
AT1G13460.2	71.15	67.27
AT1G13470.1	100	100
AT1G13560.1	69.72	67.86
AT1G13560.2	69.72	67.86
AT1G13640.1	50	49.38
AT1G13690.1	100	100
AT1G13730.1	100	100
AT1G13740.1	42.47	39.74
AT1G13790.1	68.18	71.43
AT1G13810.1	100	100
AT1G13820.1	100	100
AT1G13870.1	38.18	38.18
AT1G13880.1	54.76	57.5
AT1G13900.1	90.08	90.08
AT1G13930.1	62.96	61.82
AT1G13930.2	6.35	6.56
AT1G13930.3	77.65	76.74
AT1G13950.1	25.42	28.85
AT1G13960.1	54.84	57.14
AT1G13960.2	97.25	98.15
AT1G13980.1	100	100
AT1G13980.2	100	100
AT1G13990.1	100	100
AT1G13990.2	100	100
AT1G13990.3	100	100
AT1G14000.1	91.55	90.28
AT1G14010.1	100	100
AT1G14030.1	86.67	89.66
AT1G14060.1	91.78	89.33
AT1G14140.1	93.42	92.21
AT1G14150.1	100	100
AT1G14150.2	100	100
AT1G14170.1	25.97	25
AT1G14170.2	25.97	25
AT1G14170.3	25.97	25
AT1G14200.1	100	100
AT1G14250.1	95.92	94.95
AT1G14270.1	100	100
AT1G14270.2	100	100
AT1G14270.3	100	100
AT1G14270.4	100	100
AT1G14280.1	100	100
AT1G14300.1	100	100
AT1G14300.2	100	100
AT1G14310.1	85.29	96.67
AT1G14320.1	100	100
AT1G14320.2	100	100
AT1G14330.1	98.85	100
AT1G14345.1	53.03	52.24
AT1G14350.1	66.47	66.47
AT1G14350.2	81.88	81.29
AT1G14360.1	81.93	81.93
AT1G14380.1	78.57	78.57
AT1G14380.2	78.57	78.57
AT1G14380.3	78.57	78.57
AT1G14400.1	97.5	96.3
AT1G14400.2	97.5	96.3
AT1G14410.1	98.65	98.65
AT1G14440.1	100	100
AT1G14440.2	100	100
AT1G14450.1	100	100
AT1G14460.1	100	100
AT1G14510.1	22.45	25.88
AT1G14570.1	57.81	56.92
AT1G14570.2	57.81	56.92
AT1G14570.3	57.81	56.92
AT1G14570.4	57.81	56.92
AT1G14580.1	59.6	57.84
AT1G14580.2	97	97
AT1G14610.1	68.6	68.6
AT1G14620.1	66.13	73.21
AT1G14620.2	69.86	76.12
AT1G14650.1	26.51	26.83
AT1G14650.2	100	100
AT1G14670.1	84.76	83.18
AT1G14685.1	34.17	33.33
AT1G14685.2	35.34	33.33
AT1G14685.3	35.34	33.33
AT1G14687.1	100	100
AT1G14690.1	88.98	89.74
AT1G14690.2	87.29	87.18
AT1G14700.1	100	100
AT1G14700.2	100	100
AT1G14710.1	35.79	35.42
AT1G14710.2	35.79	35.42
AT1G14720.1	52.94	49.09
AT1G14740.1	82.35	78.87
AT1G14810.1	100	100
AT1G14820.1	100	100
AT1G14820.3	100	100
AT1G14830.1	90.59	92.77
AT1G14840.1	70.19	72.28
AT1G14840.2	52.7	52
AT1G14880.1	84.21	80
AT1G14890.1	67.37	69.57
AT1G14900.1	100	100
AT1G14910.1	0	0
AT1G14980.1	100	100
AT1G14990.1	94.2	92.86
AT1G14990.2	97.03	96.08
AT1G15000.1	100	100
AT1G15020.1	100	100
AT1G15020.2	100	100
AT1G15030.1	62.12	61.19
AT1G15060.1	79.87	81.51
AT1G15120.1	100	100
AT1G15120.2	50.62	54.67
AT1G15130.1	90.91	94.59
AT1G15140.1	86.44	83.61
AT1G15140.2	72.88	72.88
AT1G15140.3	55.34	60
AT1G15180.1	77.19	75.86
AT1G15180.2	59.7	54.05
AT1G15200.1	35	36.84
AT1G15200.2	35	36.84
AT1G15200.3	35	36.84
AT1G15200.4	35	36.84
AT1G15230.1	96.59	96.59
AT1G15250.1	100	100
AT1G15260.1	50	48
AT1G15270.1	94.34	96.15
AT1G15280.1	94.41	91.22
AT1G15280.2	92.96	90.41
AT1G15290.1	90.32	92.31
AT1G15310.1	100	100
AT1G15340.1	98.53	97.1
AT1G15340.2	98.53	97.1
AT1G15350.1	45.71	47.76
AT1G15350.2	45.71	47.76
AT1G15350.3	37.7	41.07
AT1G15370.1	95.45	100
AT1G15390.1	71.93	70.69
AT1G15400.1	89.23	90.62
AT1G15400.2	86	86
AT1G15400.3	100	100
AT1G15420.1	61.4	55.56
AT1G15470.1	92	93.88
AT1G15480.1	6.38	5.88
AT1G15500.1	100	100
AT1G15660.1	85.29	87.88
AT1G15690.1	35.85	36.19
AT1G15690.2	61.49	62.57
AT1G15710.1	100	100
AT1G15730.1	0	0
AT1G15740.1	33.33	34.17
AT1G15750.1	88.61	86.42
AT1G15750.2	88.61	86.42
AT1G15750.3	88.61	86.42
AT1G15750.4	88.61	86.42
AT1G15780.1	100	100
AT1G15790.1	85.96	87.5
AT1G15790.2	100	100
AT1G15810.1	100	100
AT1G15820.1	72.31	73.44
AT1G15860.1	98.86	100
AT1G15860.2	98.86	100
AT1G15860.3	98.86	100
AT1G15880.1	78.85	80.39
AT1G15885.1	11.67	11.29
AT1G15910.1	58.78	58.78
AT1G15930.1	85.19	85.19
AT1G15930.2	85.19	85.19
AT1G15940.1	100	100
AT1G15950.1	100	100
AT1G15950.2	100	100
AT1G15970.1	100	100
AT1G15980.1	100	100
AT1G16000.1	95.65	97.06
AT1G16010.1	100	100
AT1G16010.2	100	100
AT1G16010.3	100	100
AT1G16040.1	57.69	57.69
AT1G16080.1	91.76	92.86
AT1G16170.1	100	100
AT1G16180.1	47.14	47.83
AT1G16180.2	100	100
AT1G16190.1	100	100
AT1G16210.1	32.81	31.82
AT1G16240.1	85.71	85.71
AT1G16240.2	85.71	85.71
AT1G16240.3	73.68	75
AT1G16260.1	100	100
AT1G16260.2	100	100
AT1G16270.1	98.48	98.48
AT1G16270.2	98.48	98.48
AT1G16320.1	87.88	85.29
AT1G16350.1	76.32	74.36
AT1G16410.1	55.32	55.32
AT1G16410.2	100	100
AT1G16430.1	100	100
AT1G16460.1	53.57	54.88
AT1G16460.2	59.09	60.94
AT1G16460.3	53.57	54.88
AT1G16460.4	53.57	54.88
AT1G16470.1	80.3	81.54
AT1G16470.2	80.3	81.54
AT1G16500.1	25	26.32
AT1G16520.1	24	21.05
AT1G16560.1	95.5	95.5
AT1G16560.2	95.5	95.5
AT1G16560.3	95.5	95.5
AT1G16560.4	95.5	95.5
AT1G16610.1	94.2	94.2
AT1G16610.2	93.1	96.43
AT1G16610.3	100	100
AT1G16630.1	100	100
AT1G16670.1	98	98
AT1G16680.1	77.65	76.74
AT1G16700.1	74.65	79.1
AT1G16720.1	58.82	58.82
AT1G16740.1	93.18	100
AT1G16790.1	100	100
AT1G16810.1	0	0
AT1G16810.2	98.18	100
AT1G16840.1	41.11	41.11
AT1G16840.2	75	75.66
AT1G16840.3	76.92	79.55
AT1G16840.4	85.07	85.71
AT1G16850.1	72.09	72.94
AT1G16858.1	55	55.59
AT1G16860.1	100	100
AT1G16870.1	43.75	47.95
AT1G16880.1	30.95	29.55
AT1G16880.2	100	98.59
AT1G16890.1	58.06	56.25
AT1G16890.2	68.48	72.41
AT1G16890.3	23.93	24.35
AT1G16916.1	95.24	95.24
AT1G16920.1	69.57	65.31
AT1G16960.1	40.28	42.65
AT1G17050.1	48.78	54.05
AT1G17070.1	100	100
AT1G17080.1	96.36	94.64
AT1G17100.1	92.5	94.87
AT1G17110.1	100	100
AT1G17110.2	100	100
AT1G17130.1	100	100
AT1G17130.2	100	100
AT1G17140.1	100	100
AT1G17140.2	100	100
AT1G17145.1	65.79	68.49
AT1G17160.1	87.18	91.89
AT1G17160.2	90.2	92
AT1G17210.1	96.75	98.35
AT1G17220.1	63.54	60.4
AT1G17280.1	61.45	61.45
AT1G17280.2	33.8	32.88
AT1G17290.1	44.12	43.27
AT1G17330.1	62.82	62.82
AT1G17340.1	69.42	71.79
AT1G17360.1	100	100
AT1G17370.1	68.35	65.85
AT1G17370.2	20.25	19.51
AT1G17380.1	70.18	75.47
AT1G17420.1	100	100
AT1G17430.1	100	100
AT1G17440.1	63.96	61.21
AT1G17440.2	60.49	62.03
AT1G17455.1	97.01	100
AT1G17455.2	97.01	100
AT1G17470.1	100	100
AT1G17470.2	100	100
AT1G17490.1	78.95	82.19
AT1G17500.1	100	100
AT1G17510.1	100	100
AT1G17520.1	78.5	78.5
AT1G17530.1	100	100
AT1G17550.1	64.91	66.96
AT1G17580.1	59.74	56.79
AT1G17620.1	100	100
AT1G17650.1	100	100
AT1G17665.1	100	100
AT1G17680.1	69.09	66.67
AT1G17680.2	69.09	66.67
AT1G17690.1	100	100
AT1G17720.1	88.51	88.89
AT1G17720.2	88.51	88.89
AT1G17730.1	25	23.53
AT1G17745.1	93	91.18
AT1G17745.2	95.56	95.56
AT1G17780.1	53.26	53.85
AT1G17780.2	100	100
AT1G17820.1	38.24	40.62
AT1G17840.1	92.68	94.53
AT1G17850.1	79.85	81.2
AT1G17850.2	71.82	71.82
AT1G17880.1	81.63	85.11
AT1G17890.1	100	100
AT1G17890.2	100	100
AT1G17890.3	100	100
AT1G17930.1	64.63	68.35
AT1G17970.1	100	100
AT1G17980.1	44.16	48.57
AT1G17980.2	47.14	47.14
AT1G17990.1	50.44	51.82
AT1G17990.2	33.33	35.19
AT1G18000.1	100	100
AT1G18010.1	100	100
AT1G18020.1	62.5	64.36
AT1G18030.1	53.47	58.06
AT1G18030.2	71.62	76.98
AT1G18060.1	30.77	32.65
AT1G18070.1	88.46	87.12
AT1G18070.2	85.27	83.97
AT1G18070.3	99.13	100
AT1G18080.1	6.15	5.56
AT1G18150.1	93.51	91.14
AT1G18150.2	93.51	91.14
AT1G18150.3	97.46	98.29
AT1G18160.1	62.12	63.08
AT1G18170.1	100	100
AT1G18190.1	100	100
AT1G18210.1	95.92	94.95
AT1G18210.2	100	100
AT1G18250.1	58.97	63.01
AT1G18250.2	58.97	63.01
AT1G18260.1	67.69	69.84
AT1G18265.1	100	100
AT1G18300.1	89.01	89.01
AT1G18370.1	100	100
AT1G18440.1	93.06	94.37
AT1G18450.1	73.91	75
AT1G18470.1	83.87	83.87
AT1G18470.2	62.86	61.11
AT1G18480.1	54.1	54.1
AT1G18485.1	47.92	47.92
AT1G18490.1	62.5	61.19
AT1G18500.1	0	0
AT1G18540.1	88.89	91.43
AT1G18580.1	40.79	40.26
AT1G18590.1	100	100
AT1G18620.1	33.93	35.85
AT1G18620.2	33.93	35.85
AT1G18630.1	100	100
AT1G18650.1	88.24	90
AT1G18660.1	43.27	45.92
AT1G18660.2	43.27	45.92
AT1G18660.3	43.27	45.92
AT1G18660.4	86.72	88.1
AT1G18670.1	72.07	73.39
AT1G18700.1	100	100
AT1G18700.2	100	100
AT1G18700.4	100	100
AT1G18720.1	22.22	22.58
AT1G18730.1	100	100
AT1G18730.2	31.46	32.18
AT1G18730.3	100	100
AT1G18730.4	39.72	40.09
AT1G18740.1	24.19	26.79
AT1G18800.1	100	100
AT1G18810.1	100	100
AT1G18840.1	95.52	95.52
AT1G18840.2	95.52	95.52
AT1G18890.1	73.66	72.05
AT1G18950.1	85.59	87.96
AT1G19000.1	70.16	69.05
AT1G19000.2	69.89	70.29
AT1G19010.1	15.09	14.55
AT1G19010.2	15.09	14.55
AT1G19020.1	100	100
AT1G19050.1	100	100
AT1G19080.1	87.69	87.69
AT1G19080.2	87.69	87.69
AT1G19110.1	88.89	85.11
AT1G19120.1	97.22	100
AT1G19130.1	3.03	2.86
AT1G19150.1	100	100
AT1G19180.1	99.16	100
AT1G19180.2	99.16	100
AT1G19240.1	74.77	76.19
AT1G19300.1	100	100
AT1G19310.1	22.58	23.73
AT1G19350.1	48.15	49.37
AT1G19350.3	37.04	37.97
AT1G19350.4	37.04	37.97
AT1G19350.5	37.04	37.97
AT1G19350.6	19.75	18.6
AT1G19360.1	36.21	40.38
AT1G19370.1	97.5	100
AT1G19396.1	39.39	40.62
AT1G19396.3	39.39	40.62
AT1G19397.1	42.15	45.13
AT1G19400.1	27.12	26.67
AT1G19400.2	27.12	26.67
AT1G19430.1	100	100
AT1G19440.1	92.71	94.68
AT1G19485.1	100	100
AT1G19485.2	100	100
AT1G19520.1	100	100
AT1G19520.2	100	100
AT1G19530.1	61.22	61.22
AT1G19570.1	14.29	15.22
AT1G19570.2	8.51	8.33
AT1G19580.1	99.17	98.35
AT1G19580.2	55.1	55.96
AT1G19600.1	62.2	62.2
AT1G19660.1	36	34.95
AT1G19660.2	36	34.95
AT1G19670.1	55.17	57.14
AT1G19680.1	40.82	37.74
AT1G19690.1	100	100
AT1G19700.1	78.87	77.78
AT1G19700.2	100	100
AT1G19700.3	73.33	67.07
AT1G19710.1	100	100
AT1G19715.1	54.79	57.14
AT1G19715.2	100	100
AT1G19715.3	100	100
AT1G19720.1	100	100
AT1G19730.1	48.48	49.48
AT1G19740.1	41.33	39.74
AT1G19770.1	100	100
AT1G19800.1	78	79.59
AT1G19800.2	77.08	78.72
AT1G19800.3	77.08	78.72
AT1G19835.1	95.45	96.55
AT1G19835.2	95.45	96.55
AT1G19870.1	43.41	45.9
AT1G19880.1	85.71	83.08
AT1G19910.1	64.29	63.53
AT1G19920.1	62.69	63.64
AT1G19950.1	100	100
AT1G19960.1	100	100
AT1G19990.1	100	100
AT1G20010.1	23.88	22.54
AT1G20020.1	64.29	61.36
AT1G20020.2	64.29	61.36
AT1G20020.3	97.5	92.86
AT1G20050.1	61.02	61.02
AT1G20090.1	100	99.03
AT1G20100.1	100	100
AT1G20100.2	94.74	92.78
AT1G20110.1	94.67	93.42
AT1G20140.1	100	100
AT1G20190.1	86.25	85.19
AT1G20200.1	63.93	65
AT1G20220.1	40.32	39.68
AT1G20225.1	100	100
AT1G20260.1	60.64	62.64
AT1G20270.1	99.11	99.11
AT1G20300.1	23.94	23.29
AT1G20330.1	91.09	93
AT1G20340.1	57.26	57.76
AT1G20370.1	100	100
AT1G20410.1	37.78	38.64
AT1G20430.1	96.7	96.7
AT1G20440.1	89.32	91.09
AT1G20450.1	97.5	100
AT1G20450.2	98.75	100
AT1G20510.1	59.32	56.45
AT1G20510.2	71.52	72.97
AT1G20560.1	52.5	50.6
AT1G20560.2	52.5	50.6
AT1G20575.1	100	100
AT1G20580.1	100	100
AT1G20610.1	100	100
AT1G20620.1	32.71	33.98
AT1G20620.2	46.7	46
AT1G20620.4	32.71	33.98
AT1G20620.5	100	100
AT1G20630.1	99.15	97.48
AT1G20670.1	29.06	29.31
AT1G20693.1	41.53	41.53
AT1G20693.2	41.53	41.53
AT1G20693.3	41.53	41.53
AT1G20696.1	74.76	71.96
AT1G20696.2	69.23	65.62
AT1G20696.3	75	72.22
AT1G20760.1	85.94	84.62
AT1G20770.1	34.29	36.36
AT1G20780.1	90.91	87.72
AT1G20810.1	80	78.79
AT1G20816.1	81.67	85.96
AT1G20830.1	27.66	25.49
AT1G20840.1	76.67	79.31
AT1G20850.1	73.02	76.67
AT1G20920.1	66.54	66.28
AT1G20920.2	66.54	66.28
AT1G20930.1	70.91	70.91
AT1G20950.1	56.06	52.11
AT1G20960.1	45.87	51.02
AT1G20960.2	6.76	7.25
AT1G20970.1	24.07	25.49
AT1G20980.1	90.91	89.74
AT1G21065.1	72.73	71.11
AT1G21080.1	0	0
AT1G21080.2	100	100
AT1G21080.3	82.42	85.23
AT1G21100.1	100	100
AT1G21110.1	94.29	84.62
AT1G21120.1	100	100
AT1G21130.1	70.59	80
AT1G21130.2	21.01	21.37
AT1G21160.1	100	100
AT1G21170.1	53.52	55.88
AT1G21190.1	37.74	37.38
AT1G21200.1	91.96	90.35
AT1G21240.1	100	100
AT1G21250.1	60	56.52
AT1G21270.1	100	100
AT1G21310.1	70.83	73.28
AT1G21350.1	81.69	81.69
AT1G21350.2	94.37	94.37
AT1G21350.3	87.32	87.32
AT1G21370.1	98.63	100
AT1G21370.2	98.63	100
AT1G21380.1	80.7	83.64
AT1G21390.1	100	100
AT1G21400.1	100	100
AT1G21440.1	100	100
AT1G21450.1	42.72	40.74
AT1G21500.1	65	61.9
AT1G21560.1	45.21	42.86
AT1G21560.2	87.01	79.76
AT1G21560.3	87.01	79.76
AT1G21580.1	18.33	18.23
AT1G21590.1	30.89	29.92
AT1G21600.1	75.49	76.24
AT1G21600.2	100	100
AT1G21610.1	34.34	34
AT1G21610.2	34.34	34
AT1G21610.3	34.34	34
AT1G21630.1	85.05	81.98
AT1G21630.2	89.87	88.75
AT1G21640.1	36.36	38.71
AT1G21640.2	11.36	12.5
AT1G21650.1	58.9	57.33
AT1G21650.2	100	100
AT1G21650.3	100	100
AT1G21660.1	98.61	100
AT1G21670.1	100	100
AT1G21680.1	100	100
AT1G21690.1	51.95	50
AT1G21690.2	51.95	49.38
AT1G21690.3	93.75	95.74
AT1G21690.4	87.76	87.76
AT1G21700.1	61.9	57.78
AT1G21720.1	57.63	60.71
AT1G21750.1	33.33	33
AT1G21760.1	100	100
AT1G21770.1	75.86	74.58
AT1G21780.1	100	100
AT1G21780.2	100	100
AT1G21790.1	100	100
AT1G21830.1	99.06	99.06
AT1G21880.1	100	100
AT1G21880.2	100	100
AT1G21900.1	58.97	61.06
AT1G21910.1	100	99.15
AT1G21920.1	92.86	91.55
AT1G21930.1	100	100
AT1G21980.1	23.58	23.36
AT1G22060.1	67.01	67.71
AT1G22070.1	92.55	91.58
AT1G22140.1	14.04	12.5
AT1G22160.1	100	100
AT1G22190.1	100	100
AT1G22200.1	84.21	76.19
AT1G22200.2	87.22	82.27
AT1G22230.1	100	100
AT1G22250.1	87.5	87.5
AT1G22270.1	98.63	98.63
AT1G22280.1	46.09	48.36
AT1G22280.2	34.19	37.91
AT1G22280.3	63.64	67.96
AT1G22300.1	87.93	87.18
AT1G22300.2	77.42	75.79
AT1G22300.3	67.21	69.49
AT1G22310.1	96.55	96.61
AT1G22310.2	96.55	96.61
AT1G22330.1	98.84	96.59
AT1G22360.1	100	100
AT1G22360.2	100	100
AT1G22370.1	44.12	44.12
AT1G22400.1	100	100
AT1G22410.1	100	100
AT1G22430.1	100	100
AT1G22430.2	100	100
AT1G22450.1	92.73	93.58
AT1G22520.1	48.28	50.6
AT1G22530.1	98.9	98.9
AT1G22590.1	99.06	99.06
AT1G22590.2	100	100
AT1G22610.1	100	100
AT1G22620.1	69.35	63.24
AT1G22630.1	97.73	97.73
AT1G22690.1	36	38.3
AT1G22690.2	0	0
AT1G22690.3	100	100
AT1G22700.1	86	89.58
AT1G22700.2	86	89.58
AT1G22700.3	86	89.58
AT1G22710.1	37.04	38.96
AT1G22730.1	24	23.08
AT1G22740.1	89.86	92.54
AT1G22780.1	100	100
AT1G22790.1	100	100
AT1G22790.2	100	100
AT1G22800.1	100	100
AT1G22840.1	100	100
AT1G22840.2	100	100
AT1G22850.1	78.33	83.93
AT1G22882.1	97.22	100
AT1G22885.1	48.28	50.6
AT1G22885.2	100	100
AT1G22890.1	98.97	98.97
AT1G22910.1	63.16	64
AT1G22910.2	52.94	56.25
AT1G22910.3	42.37	43.86
AT1G22930.1	69.57	71.11
AT1G22930.2	69.57	71.11
AT1G22940.1	100	100
AT1G22950.1	55.32	61.9
AT1G22970.1	100	100
AT1G23020.1	100	100
AT1G23020.2	12.9	12.12
AT1G23030.1	100	100
AT1G23080.1	12.73	12.28
AT1G23080.2	34.01	33.43
AT1G23080.3	12.73	12.28
AT1G23090.1	98.9	100
AT1G23130.1	87.67	91.43
AT1G23190.1	83.53	82.56
AT1G23205.1	100	100
AT1G23220.1	100	100
AT1G23260.1	82.86	84.06
AT1G23290.1	72.09	64.58
AT1G23310.1	96.74	96.74
AT1G23310.2	85.83	85.16
AT1G23360.1	11.25	12.33
AT1G23360.2	11.25	12.33
AT1G23360.3	11.25	12.33
AT1G23390.1	47.17	47.62
AT1G23400.1	100	100
AT1G23410.1	100	100
AT1G23440.1	92.86	92.86
AT1G23490.1	97	96.04
AT1G23710.1	100	100
AT1G23740.1	95.12	95.12
AT1G23750.1	92.93	93.88
AT1G23820.1	84.34	86.42
AT1G23820.2	50.76	55.37
AT1G23860.1	47.44	49.28
AT1G23860.2	19.9	19.9
AT1G23860.3	86.83	85.99
AT1G23860.4	19.34	19.34
AT1G23870.1	100	100
AT1G23900.1	48.08	45.05
AT1G23900.2	48.08	45.05
AT1G23950.1	70.88	70.49
AT1G23950.2	100	96.15
AT1G23950.3	100	96.15
AT1G23950.4	95.65	96.35
AT1G23950.5	100	96.55
AT1G23960.1	16.67	15.94
AT1G23960.2	16.67	15.94
AT1G23970.1	76.32	72.5
AT1G23970.2	100	100
AT1G24020.1	46.77	44.62
AT1G24020.2	100	100
AT1G24040.1	28.46	28.23
AT1G24050.1	81.56	81.56
AT1G24100.1	42.86	38.46
AT1G24120.1	27.78	28.57
AT1G24147.1	100	100
AT1G24160.1	91.25	92.41
AT1G24160.2	78.57	81.48
AT1G24170.1	37.84	40.58
AT1G24180.1	73.17	71.43
AT1G24190.1	16.84	16.67
AT1G24190.2	16.84	16.67
AT1G24240.1	84.44	86.36
AT1G24267.1	65.08	68.33
AT1G24267.2	65.08	68.33
AT1G24300.1	97.96	100
AT1G24300.2	97.96	100
AT1G24310.1	82.67	87.32
AT1G24340.1	100	100
AT1G24350.1	89.66	89.66
AT1G24350.2	98.35	97.54
AT1G24360.1	56.06	56.06
AT1G24450.1	62.16	60.53
AT1G24460.1	100	98.92
AT1G24460.2	100	100
AT1G24490.1	69.9	71.29
AT1G24490.2	69.9	71.29
AT1G24510.1	31.25	33.9
AT1G24510.2	31.25	33.9
AT1G24560.1	100	100
AT1G24575.1	98.36	98.36
AT1G24610.1	98.73	100
AT1G24625.1	34.15	34.15
AT1G24706.1	56.48	61
AT1G24706.2	38.68	40.2
AT1G24764.1	61.49	62.26
AT1G24793.1	38.16	39.19
AT1G24793.2	20	18.64
AT1G24800.1	36.36	37.74
AT1G24880.1	15.52	14.75
AT1G24880.2	76	84.44
AT1G24880.3	34.92	34.38
AT1G24881.1	64.91	68.52
AT1G24909.1	74.14	74.78
AT1G25054.1	98.72	98.72
AT1G25054.2	100	100
AT1G25055.1	36.36	38.46
AT1G25083.1	100	100
AT1G25145.1	21.95	23.38
AT1G25150.1	85.45	85.45
AT1G25155.1	74.14	74.78
AT1G25210.1	98.72	98.72
AT1G25210.2	61.03	61.03
AT1G25211.1	100	97.85
AT1G25220.1	42.24	41.53
AT1G25220.2	95.41	94.92
AT1G25230.1	100	100
AT1G25250.1	100	100
AT1G25260.1	31.58	30
AT1G25275.1	62.32	68.25
AT1G25275.2	85	94.44
AT1G25275.3	62.32	68.25
AT1G25280.1	72.22	84.78
AT1G25280.2	72.22	84.78
AT1G25350.1	80.85	82.61
AT1G25350.2	35	33.33
AT1G25370.1	100	100
AT1G25380.1	98.28	100
AT1G25390.1	16.67	16.13
AT1G25400.1	78.38	76.99
AT1G25400.2	78.38	76.99
AT1G25420.1	12.05	13.16
AT1G25420.2	10.98	12
AT1G25420.3	10.98	11.84
AT1G25440.1	91.43	94.12
AT1G25450.1	27.87	29.31
AT1G25490.1	55.36	56.36
AT1G25520.1	46.15	50.53
AT1G25540.1	23.64	26.8
AT1G25540.2	23.64	26.8
AT1G25550.1	90.38	85.45
AT1G25560.1	100	100
AT1G25570.1	20.83	21.55
AT1G25580.1	65	65.66
AT1G25682.1	48.57	50.75
AT1G26090.1	76.6	75
AT1G26110.1	47.73	50
AT1G26110.2	47.73	50
AT1G26150.1	90.57	90.57
AT1G26160.1	27.93	27.93
AT1G26180.1	50.98	50.49
AT1G26210.1	67.09	68.83
AT1G26220.1	100	100
AT1G26230.1	72.5	72.5
AT1G26230.2	72.5	72.5
AT1G26260.1	62	61.39
AT1G26260.2	62	61.39
AT1G26260.3	61	60.4
AT1G26270.1	98.92	100
AT1G26290.1	100	100
AT1G26300.1	100	100
AT1G26340.1	89.86	80.52
AT1G26440.1	40	38.46
AT1G26440.2	40	38.46
AT1G26440.3	40	38.46
AT1G26440.4	40	38.46
AT1G26450.1	67.71	66.33
AT1G26460.1	24.76	24.53
AT1G26470.1	100	100
AT1G26520.1	24.14	24.56
AT1G26550.1	73.33	69.84
AT1G26580.1	83.16	85.87
AT1G26630.1	30.21	31.18
AT1G26630.2	31.45	31.2
AT1G26640.1	92.65	92.65
AT1G26660.1	32.35	30.99
AT1G26660.2	100	100
AT1G26665.1	40.54	41.67
AT1G26665.2	40.54	41.67
AT1G26670.1	88.57	87.32
AT1G26690.1	84.78	92.86
AT1G26740.1	29.63	34.78
AT1G26750.1	62.5	63.49
AT1G26760.1	100	100
AT1G26761.1	100	100
AT1G26770.1	81.46	82.39
AT1G26800.1	31.54	32.87
AT1G26830.1	100	100
AT1G26850.1	82.72	82.72
AT1G26850.2	82.72	82.72
AT1G26850.3	81.25	84.97
AT1G26880.1	100	96.43
AT1G26880.2	60.45	59.56
AT1G26910.1	100	100
AT1G26920.1	96.77	94.74
AT1G26930.1	100	100
AT1G26940.1	55.56	52.63
AT1G27000.1	72.34	70.1
AT1G27020.1	80.41	79.59
AT1G27030.1	100	98.95
AT1G27050.1	10	9.38
AT1G27090.1	100	100
AT1G27100.1	66.19	69.17
AT1G27130.1	100	100
AT1G27150.1	100	100
AT1G27190.1	52.44	55.84
AT1G27210.1	27.72	29.79
AT1G27290.1	96.33	94.59
AT1G27290.2	99.04	99.04
AT1G27300.1	100	100
AT1G27310.1	88.68	87.04
AT1G27320.1	28.97	29.79
AT1G27330.1	75	73.47
AT1G27340.1	36.84	36.84
AT1G27350.1	91.84	88.24
AT1G27385.1	71.21	73.44
AT1G27385.2	71.21	73.44
AT1G27390.1	53.45	52.1
AT1G27400.1	27.14	29.23
AT1G27430.1	100	100
AT1G27435.1	76.38	75.78
AT1G27450.1	66.04	74.47
AT1G27450.2	66.04	74.47
AT1G27450.3	52.56	52.56
AT1G27460.1	100	100
AT1G27470.1	89.02	87.95
AT1G27480.1	100	100
AT1G27510.1	76.19	75
AT1G27520.1	47.87	51.72
AT1G27530.1	18.18	20.41
AT1G27540.1	91.49	92.47
AT1G27565.1	94.03	98.44
AT1G27600.1	89.72	92.31
AT1G27600.2	0	0
AT1G27630.1	78.57	79.2
AT1G27650.1	47.92	47.92
AT1G27650.2	47.92	47.92
AT1G27680.1	65.96	64.58
AT1G27695.1	100	100
AT1G27695.2	100	100
AT1G27700.1	0	0
AT1G27730.1	100	100
AT1G27752.1	52.27	56.1
AT1G27752.2	57.53	61.76
AT1G27760.1	19.78	18.56
AT1G27760.2	18.39	16.16
AT1G27760.3	19.78	18.56
AT1G27770.1	25.56	27.06
AT1G27770.2	25.56	27.06
AT1G27840.1	100	100
AT1G27840.2	100	100
AT1G27840.3	100	100
AT1G27850.1	40.28	41.43
AT1G27930.1	14.67	15.71
AT1G27950.1	39.53	36.17
AT1G27970.1	100	98.77
AT1G27970.2	100	100
AT1G27980.1	93.62	93.62
AT1G28050.1	93.55	98.31
AT1G28060.1	75	72.58
AT1G28090.1	65.31	68.09
AT1G28090.2	65.31	68.09
AT1G28090.3	65.31	68.09
AT1G28120.1	61.25	55.81
AT1G28140.1	22.39	20.83
AT1G28150.1	46.03	46.77
AT1G28190.1	0	0
AT1G28200.1	41.1	41.1
AT1G28240.1	100	100
AT1G28280.1	59.51	61.93
AT1G28280.2	76.81	79.1
AT1G28290.1	94.03	91.3
AT1G28290.2	95.52	92.75
AT1G28320.1	98.08	98.08
AT1G28330.1	73.11	75
AT1G28330.2	76.09	77.21
AT1G28330.3	43.62	43.62
AT1G28330.5	73.39	74.77
AT1G28340.1	31.58	32.26
AT1G28350.1	92.75	91.43
AT1G28370.1	80.71	81.88
AT1G28380.1	85.06	86.05
AT1G28390.1	100	92.16
AT1G28395.1	100	100
AT1G28395.2	94.69	95.54
AT1G28395.3	100	100
AT1G28395.4	74.07	74.07
AT1G28395.5	72.09	68.89
AT1G28400.1	100	100
AT1G28420.1	100	100
AT1G28440.1	96.84	100
AT1G28480.1	100	100
AT1G28490.1	100	100
AT1G28490.2	100	100
AT1G28510.1	16.19	14.78
AT1G28520.1	60.59	60.59
AT1G28520.2	92.08	91.18
AT1G28540.1	100	100
AT1G28580.1	81.18	83.13
AT1G28580.2	81.18	83.13
AT1G28600.1	100	100
AT1G28600.2	81.03	82.72
AT1G28610.2	44.58	46.25
AT1G28960.2	66.91	65.94
AT1G28960.3	80.62	80.62
AT1G28960.4	46.02	45.22
AT1G28960.5	79.31	81.12
AT1G29030.1	100	100
AT1G29040.1	62.66	63.28
AT1G29040.2	100	100
AT1G29040.3	100	100
AT1G29040.4	46.79	46.44
AT1G29060.1	61.76	63.64
AT1G29070.1	33.33	32.73
AT1G29150.1	100	100
AT1G29220.1	100	100
AT1G29220.2	100	100
AT1G29250.1	100	100
AT1G29260.1	94.5	95.37
AT1G29310.1	91.84	90
AT1G29320.1	82.86	96.67
AT1G29340.1	100	100
AT1G29350.1	98.92	100
AT1G29370.1	81.67	81.67
AT1G29390.1	100	100
AT1G29390.2	100	100
AT1G29395.1	47.5	46.34
AT1G29400.1	61.21	59.17
AT1G29400.2	61.21	59.17
AT1G29418.1	44.9	45.83
AT1G29470.1	90	90
AT1G29470.2	90	90
AT1G29530.1	81.37	79.81
AT1G29550.1	100	100
AT1G29560.1	100	100
AT1G29560.2	100	100
AT1G29660.1	24.44	26.83
AT1G29670.1	93.33	91.3
AT1G29700.1	31.82	33.87
AT1G29750.2	96.72	100
AT1G29790.1	87.31	86.67
AT1G29790.2	66.24	65.41
AT1G29810.1	100	100
AT1G29820.1	98.04	100
AT1G29820.2	98.04	100
AT1G29850.1	61.68	62.26
AT1G29850.2	61.68	62.26
AT1G29850.3	88.24	88.24
AT1G29880.1	100	100
AT1G29890.1	100	100
AT1G29890.2	100	100
AT1G29900.1	87.67	86.49
AT1G29910.1	96.49	100
AT1G29920.1	99.12	99.12
AT1G29930.1	70.91	69.64
AT1G29940.1	56.67	50.75
AT1G29950.1	85.84	83.05
AT1G29950.2	96.84	98.92
AT1G29951.1	36.17	35.36
AT1G29952.1	24.24	24.14
AT1G29965.1	100	100
AT1G29970.1	45.78	45.24
AT1G29970.2	100	100
AT1G29980.1	24.32	21.95
AT1G29990.1	32.18	32.18
AT1G30000.1	62.63	62.63
AT1G30070.1	86.57	84.06
AT1G30070.2	85.48	82.81
AT1G30090.1	100	100
AT1G30110.1	100	100
AT1G30110.2	48.65	45
AT1G30120.1	90.2	90.2
AT1G30130.1	62	59.05
AT1G30130.2	64.81	60.34
AT1G30200.1	20.41	20.98
AT1G30200.2	22.37	23.61
AT1G30210.1	100	100
AT1G30210.2	52.75	50
AT1G30230.1	51.28	51.28
AT1G30230.2	96.08	100
AT1G30250.1	67.42	66.67
AT1G30260.1	90.82	89.9
AT1G30270.1	60.83	58.87
AT1G30280.1	100	100
AT1G30320.1	100	100
AT1G30330.1	55.56	55.56
AT1G30330.2	55.56	55.56
AT1G30360.1	68.97	68.97
AT1G30380.1	98.59	95.89
AT1G30400.1	25.86	24.19
AT1G30400.2	81.03	83.19
AT1G30410.1	98.04	100
AT1G30440.1	100	98.41
AT1G30460.1	96.43	96.43
AT1G30470.1	100	100
AT1G30470.2	100	100
AT1G30470.3	100	100
AT1G30480.1	100	100
AT1G30490.1	37.88	40.98
AT1G30510.1	100	100
AT1G30510.2	100	100
AT1G30510.3	100	100
AT1G30530.1	100	100
AT1G30580.1	97.78	100
AT1G30610.2	100	100
AT1G30630.1	92.31	94.74
AT1G30680.1	95.93	97.52
AT1G30690.1	100	100
AT1G30690.2	100	100
AT1G30810.1	100	100
AT1G30810.2	94.37	95.71
AT1G30820.1	100	100
AT1G30880.1	38	37.25
AT1G30910.1	24.32	25
AT1G30960.1	100	100
AT1G30970.1	48.98	44.86
AT1G30970.2	48.98	44.86
AT1G31070.1	29.09	29.35
AT1G31070.2	100	100
AT1G31130.1	100	100
AT1G31150.1	24	22.22
AT1G31160.1	96.83	92.42
AT1G31170.1	100	100
AT1G31170.2	38.64	41.46
AT1G31170.3	100	100
AT1G31170.4	93.88	93.88
AT1G31180.1	48.57	44.74
AT1G31190.1	97.78	100
AT1G31230.1	0	0
AT1G31280.1	56	56.76
AT1G31310.1	100	100
AT1G31330.1	100	100
AT1G31340.1	97.33	100
AT1G31350.1	98.21	98.21
AT1G31360.1	100	100
AT1G31360.2	100	100
AT1G31410.1	76.36	80.77
AT1G31420.1	18.45	18.27
AT1G31420.2	31.3	33.33
AT1G31440.1	88.89	88
AT1G31540.2	70.32	73.33
AT1G31550.1	100	100
AT1G31580.1	100	97.73
AT1G31600.1	60.43	59.15
AT1G31600.2	60.43	59.15
AT1G31600.3	60.43	59.15
AT1G31650.1	100	100
AT1G31660.1	98.63	98.63
AT1G31730.1	95.08	96.67
AT1G31780.1	36.59	42.86
AT1G31800.1	100	98.67
AT1G31810.1	65.71	69
AT1G31812.1	32.05	32.47
AT1G31817.1	45.9	49.12
AT1G31850.1	75	77.65
AT1G31850.2	82.76	84.71
AT1G31850.3	75	77.65
AT1G31860.1	97.78	97.78
AT1G31870.1	100	98.92
AT1G31870.2	100	98.92
AT1G31910.1	96.43	100
AT1G31910.2	52.9	51.77
AT1G31930.1	100	100
AT1G31930.2	100	100
AT1G31930.3	94.67	95.95
AT1G31940.1	4.69	4.35
AT1G31970.1	100	100
AT1G32050.1	7.92	7.84
AT1G32060.1	4.23	4.29
AT1G32070.1	88.37	86.36
AT1G32070.2	20.75	22
AT1G32070.3	20.75	22
AT1G32080.1	97.5	97.5
AT1G32100.1	0	0
AT1G32130.1	100	100
AT1G32130.2	100	100
AT1G32160.1	100	100
AT1G32170.1	29.41	31.91
AT1G32200.1	95.33	95.33
AT1G32200.2	100	100
AT1G32210.1	100	100
AT1G32220.1	95.92	97.92
AT1G32230.1	62.5	62.5
AT1G32230.2	62.5	62.5
AT1G32230.3	97.32	94.77
AT1G32240.1	100	100
AT1G32260.1	100	100
AT1G32310.1	100	100
AT1G32340.1	60.58	63.85
AT1G32360.1	100	100
AT1G32400.1	27.06	27.38
AT1G32400.2	48.24	46.59
AT1G32400.3	39.29	37.08
AT1G32410.1	100	96.51
AT1G32410.2	100	96.51
AT1G32410.3	100	96.51
AT1G32410.4	100	96.51
AT1G32410.5	100	96.51
AT1G32440.1	100	100
AT1G32460.1	32.73	32.14
AT1G32470.1	100	100
AT1G32490.1	44.44	46.81
AT1G32490.2	83.52	85.39
AT1G32500.1	98.81	98.81
AT1G32530.1	3.03	2.99
AT1G32550.1	66.67	66.67
AT1G32580.1	10.29	10.14
AT1G32630.1	100	100
AT1G32640.1	96.1	94.87
AT1G32700.1	92.63	92.63
AT1G32700.2	68.42	68.42
AT1G32750.1	0	0
AT1G32790.1	63.64	71.01
AT1G32790.2	36.84	36.84
AT1G32870.1	56.98	58.33
AT1G32870.2	56.98	58.33
AT1G32920.1	70.91	73.58
AT1G32990.1	31.11	31.11
AT1G33040.1	63.41	74.29
[truncated: 13,259 more rows]

## Sheet: F5
F5 Root Control vs. Root Salt PPV, Whole Transcript
transcript	sensitivity	PPV
AT1G01010.1	58.91	58.17
AT1G01020.2	30.58	31.27
AT1G01050.1	53.04	53.38
AT1G01070.1	33.78	34.4
AT1G01090.1	33.65	34.76
AT1G01100.1	76.26	75.88
AT1G01100.2	97.12	99.51
AT1G01100.3	81.28	80.85
AT1G01100.4	85.93	86.8
AT1G01120.1	30.51	29.9
AT1G01160.1	56.7	59.48
AT1G01160.2	6.2	6.91
AT1G01170.1	76.73	77.22
AT1G01180.1	72.3	73.2
AT1G01210.1	63.13	64.1
AT1G01230.1	79.1	80.92
AT1G01240.1	65.69	65.37
AT1G01240.2	58.64	58.39
AT1G01240.3	39.46	37.88
AT1G01260.1	57.28	56.81
AT1G01260.2	52.1	52.37
AT1G01260.3	61.34	60.91
AT1G01290.1	45.83	46.22
AT1G01290.2	50.62	49.25
AT1G01300.1	24.18	23.28
AT1G01340.1	59.44	59.09
AT1G01340.2	49.94	50.51
AT1G01350.1	66.37	65.49
AT1G01360.1	56.27	56.62
AT1G01430.1	54.42	54.85
AT1G01440.1	44.62	44.37
AT1G01470.1	69.63	68.66
AT1G01490.1	81.64	81.87
AT1G01490.2	57.38	57.97
AT1G01510.1	34.77	34.62
AT1G01540.1	20.4	20.7
AT1G01540.2	28.21	28.62
AT1G01550.1	54.06	54.64
AT1G01550.2	56.21	57.79
AT1G01610.1	21.51	22.12
AT1G01620.1	65.49	68.72
AT1G01620.2	65.94	66.91
AT1G01630.1	51.34	51.2
AT1G01640.1	59.22	58.19
AT1G01640.2	52.4	51.26
AT1G01650.1	30.12	30.87
AT1G01650.2	35.38	36.49
AT1G01660.1	37.74	36.47
AT1G01670.1	27.41	27.17
AT1G01690.1	55.54	55.84
AT1G01730.1	33.57	33.69
AT1G01780.1	27.43	27.15
AT1G01800.1	43.29	43.89
AT1G01800.2	55.22	55.07
AT1G01820.1	20.11	20.83
AT1G01830.1	48.91	49.34
AT1G01830.2	48.76	48.48
AT1G01830.3	55.71	55.92
AT1G01910.1	31.1	30.75
AT1G01910.2	31.71	32.1
AT1G01910.3	55.16	55.82
AT1G01910.4	72.65	72.21
AT1G01910.5	24.49	24.6
AT1G01920.1	44.61	44.89
AT1G01920.2	33.28	33.39
AT1G01930.1	64.71	65.01
AT1G01940.1	62.15	60.73
AT1G01950.1	42.62	42.44
AT1G01950.2	33.37	33.02
AT1G01950.3	61.21	60.97
AT1G01990.1	51.06	54.37
AT1G02000.1	57.92	56.99
AT1G02050.1	54.15	56.22
AT1G02090.1	36.52	38.3
AT1G02090.2	51.79	52.1
AT1G02090.3	35.01	35.91
AT1G02100.1	55.06	54.37
AT1G02100.2	27.23	27.25
AT1G02100.3	23.56	23.34
AT1G02110.1	36.56	36.46
AT1G02120.1	37.35	38.27
AT1G02130.1	61.88	63.06
AT1G02140.1	48.98	48.58
AT1G02145.1	54.38	54.28
AT1G02145.2	44.93	43.14
AT1G02145.3	48.7	48.98
AT1G02145.4	40.64	41.23
AT1G02150.1	23.6	24.05
AT1G02160.1	37.5	37.75
AT1G02160.2	47.03	48.07
AT1G02170.1	26.57	26.76
AT1G02220.1	78.09	77.73
AT1G02280.1	57.07	56.62
AT1G02280.2	41.69	41.36
AT1G02305.1	42.92	43.11
AT1G02330.1	45.45	45.31
AT1G02335.1	68.6	68.6
AT1G02410.1	42.12	44.54
AT1G02500.1	57.09	60.26
AT1G02500.2	66.12	68.22
AT1G02520.1	31.65	31.97
AT1G02560.1	31.92	32.15
AT1G02610.1	62.93	62.5
AT1G02640.1	45.45	46.11
AT1G02680.1	31.62	31.73
AT1G02690.1	36.42	37.11
AT1G02690.2	42.31	43.17
AT1G02730.1	33.28	33.6
AT1G02750.1	58.04	58.38
AT1G02750.2	48.03	50.95
AT1G02780.1	70.61	72.59
AT1G02840.1	68.37	68.87
AT1G02840.2	71.54	71.48
AT1G02840.3	68.12	68.86
AT1G02860.1	48.07	48.86
AT1G02860.2	56.34	58.21
AT1G02870.1	68.75	70.83
AT1G02880.3	32.6	32.34
AT1G02880.4	25.48	25.48
AT1G02890.1	63.38	63.24
AT1G02890.2	46	46.35
AT1G02900.1	24.14	22.7
AT1G02920.1	58.89	57.29
AT1G02950.1	53.14	56.49
AT1G02950.2	41.86	42.42
AT1G02950.3	46.67	44.93
AT1G02950.4	62.3	65.44
AT1G02960.1	40.04	39.96
AT1G02960.2	28.35	28.24
AT1G02960.3	43.29	43.21
AT1G02990.1	40.4	40.23
AT1G02990.2	40.39	39.96
AT1G02990.3	40.86	40.65
AT1G03030.1	42.13	41.78
AT1G03040.1	50.55	50.78
AT1G03040.2	28.85	28.98
AT1G03090.1	41.33	42.36
AT1G03090.2	39.11	39.78
AT1G03130.1	58.63	59.71
AT1G03140.1	61.21	60.81
AT1G03150.1	33.9	34.93
AT1G03200.1	55.2	56.56
AT1G03210.1	71.9	70.36
AT1G03220.1	54.51	54.97
AT1G03230.1	41.96	41.51
AT1G03250.1	44.62	44.74
AT1G03250.2	52.7	55.11
AT1G03280.1	50.66	49.68
AT1G03290.1	49.57	48.41
AT1G03290.2	33.75	33.66
AT1G03330.1	35.9	37.17
AT1G03350.1	66.37	65.91
AT1G03360.1	34.56	36.41
AT1G03365.1	60.43	60.29
AT1G03370.1	41.02	41.35
AT1G03380.1	44.36	44.69
AT1G03420.1	37.57	39.11
AT1G03430.1	37.83	38.62
AT1G03457.1	70.19	70.9
AT1G03457.2	68.66	68.46
AT1G03470.1	44.26	44.36
AT1G03470.2	44.16	43.22
AT1G03475.1	51.59	51.26
AT1G03530.1	45.35	45.02
AT1G03550.1	25.31	26.55
AT1G03560.1	41.14	41.76
AT1G03590.1	25.38	25
AT1G03610.1	59.08	60.26
AT1G03740.1	42.25	42.7
AT1G03740.2	34.81	35.29
AT1G03750.1	36.46	36.21
AT1G03760.1	66.74	67.84
AT1G03770.1	47.8	48.48
AT1G03770.2	41.39	41.07
AT1G03770.3	50.89	51.09
AT1G03780.1	29.65	29.18
AT1G03780.2	40.18	40.93
AT1G03780.3	47.04	47.84
AT1G03820.1	70.23	68.91
AT1G03830.1	56.58	56.88
AT1G03830.2	66.73	67.76
AT1G03850.1	49.29	48.6
AT1G03850.2	60.56	62.62
AT1G03860.1	47.54	48.13
AT1G03860.2	39.52	38.59
AT1G03860.3	45.16	45.37
AT1G03870.1	48.26	47.28
AT1G03900.1	57.85	57.11
AT1G03910.1	37.62	37.44
AT1G03910.2	59.77	60.94
AT1G03950.1	50.17	50.67
AT1G03970.1	74.17	75.57
AT1G04030.1	34.81	35.05
AT1G04040.1	54.46	55.84
AT1G04070.1	28.64	28.37
AT1G04080.1	36.04	36.76
AT1G04080.2	42.83	43.04
AT1G04080.3	39.38	39.71
AT1G04130.1	54.57	54.57
AT1G04140.1	31.8	32.24
AT1G04140.2	35.38	35.98
AT1G04170.1	60.46	59.72
AT1G04190.1	48.33	48.56
AT1G04200.1	57.97	57.31
AT1G04220.1	41.76	40.26
AT1G04230.1	55.61	53.94
AT1G04240.1	34.04	32.66
AT1G04250.1	60.97	59.28
AT1G04260.1	49.25	49.44
AT1G04270.1	50.62	50.41
AT1G04270.2	51.65	50.81
AT1G04280.1	27.17	27.57
AT1G04290.1	69.86	70.36
AT1G04300.1	62.05	60.65
AT1G04300.2	54.63	54.9
AT1G04300.3	59.2	57.92
AT1G04300.4	49.14	48.18
AT1G04340.1	47.43	47.78
AT1G04360.1	56.04	56.67
AT1G04400.1	70.06	69.63
AT1G04400.2	62.83	61.2
AT1G04410.1	69.12	67.87
AT1G04430.1	53.81	53.47
AT1G04430.2	37.6	37.95
AT1G04440.1	63.42	63.07
AT1G04480.1	31.46	32.37
AT1G04510.1	40.25	40.44
AT1G04510.2	44.65	44.58
AT1G04520.1	33.26	34.03
AT1G04530.1	62.13	62.99
AT1G04550.1	59.09	60.34
AT1G04550.2	60.75	62.2
AT1G04555.1	52.61	54.32
AT1G04590.1	67.84	67.68
AT1G04590.2	64.34	64.19
AT1G04630.1	21.4	21.14
AT1G04635.1	97.81	98.24
AT1G04680.1	45.88	46.56
AT1G04690.1	56.3	54.89
AT1G04710.1	80.54	81.64
AT1G04750.1	53.47	53.06
AT1G04750.2	37.14	37.99
AT1G04770.1	39.79	41.1
AT1G04778.1	56.32	54.44
AT1G04780.1	47.17	48.41
AT1G04790.1	44.64	45.33
AT1G04810.1	57.84	58
AT1G04820.1	46.55	47.06
AT1G04830.1	47.48	48.85
AT1G04850.1	74.36	75.49
AT1G04860.1	44.64	44.68
AT1G04870.1	62.06	61.93
AT1G04870.2	39.85	41.43
AT1G04900.1	52.05	52.05
AT1G04910.1	44.25	42.92
AT1G04950.1	51.5	50.07
AT1G04950.2	38.46	36.87
AT1G04960.1	54.44	53.72
AT1G04960.2	72.94	72.24
AT1G04980.1	20.55	20.19
AT1G04985.1	81.76	82.54
AT1G05010.1	62.9	61.21
AT1G05060.1	37.34	37.34
AT1G05070.1	52.47	53.08
AT1G05090.1	22.29	22.65
AT1G05120.1	32.2	31.84
AT1G05135.1	22.93	22.99
AT1G05150.1	80.56	81.49
AT1G05180.1	54.66	55.54
AT1G05180.2	33.9	33.95
AT1G05180.3	65.43	65.63
AT1G05190.1	75.68	75.68
AT1G05205.1	34.95	38.92
AT1G05240.1	56.35	56.49
AT1G05250.1	40.04	39.69
AT1G05260.1	46.55	47.52
AT1G05270.1	26.65	26.95
AT1G05320.1	58.14	58.79
AT1G05320.2	58.16	58.74
AT1G05320.3	36.04	36.13
AT1G05340.1	16.14	16.82
AT1G05350.1	39.77	39.32
AT1G05380.1	37.5	38.55
AT1G05380.2	38.71	39.29
AT1G05410.1	60.41	63.24
AT1G05410.2	58.5	60.04
AT1G05430.1	79.54	80.47
AT1G05460.1	37.21	37.99
AT1G05470.1	24.41	24.91
AT1G05500.1	43.4	43.15
AT1G05520.1	58.4	58.69
AT1G05590.1	50	49.64
AT1G05620.1	65.14	64.68
AT1G05620.2	51.54	50.69
AT1G05710.1	81.69	81.12
AT1G05710.2	52.24	51.03
AT1G05710.3	65.18	62.07
AT1G05710.4	40.32	39.22
AT1G05710.5	60	57.99
AT1G05720.1	34.12	35.08
AT1G05780.1	63.43	62.84
AT1G05790.1	34.72	35.54
AT1G05805.1	64.75	64.6
AT1G05810.1	79.86	80.7
AT1G05830.1	30.21	30.09
AT1G05830.2	26.94	27.03
AT1G05840.1	60.21	60.42
AT1G05850.1	30.75	31.29
AT1G05860.1	43.13	41.88
AT1G05870.1	44.24	42.65
AT1G05870.2	32.76	33.33
AT1G05870.3	43.24	44.32
AT1G05870.4	20.93	21.58
AT1G05890.1	64.45	65.85
AT1G05890.2	31.18	31.34
AT1G05910.1	65.35	64.53
AT1G05940.1	30.73	30.59
AT1G05960.1	42.03	42.35
AT1G05960.2	54.04	53.92
AT1G06000.1	60.15	61.55
AT1G06010.1	35.58	37
AT1G06060.1	41.76	42
AT1G06070.1	58.02	57.63
AT1G06110.1	51.85	51.85
AT1G06130.1	17.57	17.73
AT1G06130.2	24.82	24.37
AT1G06149.1	43.9	43.99
AT1G06150.2	43.9	43.99
AT1G06180.1	72.86	72.34
AT1G06190.1	56.93	58.15
AT1G06190.2	53.25	54.9
AT1G06200.1	65.38	65.81
AT1G06210.1	51.31	50.98
AT1G06210.2	49.53	49.16
AT1G06220.1	25.78	26.11
AT1G06220.2	47.34	47.13
AT1G06230.1	57.32	56.83
AT1G06230.2	58.27	57.7
AT1G06230.3	45.25	45.53
AT1G06290.1	40.18	40.44
AT1G06380.1	63.46	60.44
AT1G06390.1	49.52	50.1
AT1G06390.2	59.68	61.38
AT1G06400.1	58.71	57.96
AT1G06410.1	32.97	32.34
AT1G06420.1	39.87	40.67
AT1G06420.2	49.08	49.26
AT1G06470.1	30.81	31.06
AT1G06470.2	48.5	47.83
AT1G06475.1	47.49	45.95
AT1G06500.1	99.05	99.52
AT1G06500.2	41.74	41.74
AT1G06500.3	21.21	22.4
AT1G06500.4	49.72	50.28
AT1G06515.1	32.43	30
AT1G06515.2	22.61	20.64
AT1G06520.1	28.27	28.5
AT1G06530.1	79.19	82.52
AT1G06550.1	33.4	33.2
AT1G06570.1	43.63	44.33
AT1G06570.2	39.72	40.04
AT1G06620.1	50.24	49.76
AT1G06640.1	84.17	85.15
AT1G06640.2	63.07	64.14
AT1G06640.3	79.56	80.74
AT1G06650.1	39.15	37.92
AT1G06650.2	55.95	55.56
AT1G06680.1	61.84	60.66
AT1G06700.1	41.73	42.33
AT1G06700.2	47.77	46.81
AT1G06720.1	39.34	38.89
AT1G06760.1	62.97	63.78
AT1G06780.1	57.12	57.87
AT1G06780.2	60.95	60.48
AT1G06790.1	42.96	40.85
AT1G06840.1	50.09	49.62
AT1G06850.1	40.2	40.29
AT1G06850.2	51.85	51.58
AT1G06890.1	46.28	45.9
AT1G06890.2	42.12	41.83
AT1G06890.3	42.28	42.15
AT1G06900.1	47.16	47.41
AT1G06910.1	39.68	39.92
AT1G06950.1	25.63	25.82
AT1G06960.1	55	57.29
AT1G06960.2	62.42	63.79
AT1G06960.3	54.2	56.99
AT1G07000.1	34.25	35.16
AT1G07020.1	24.19	24.64
AT1G07030.1	52.36	53.01
AT1G07040.1	32.83	32.64
AT1G07070.1	75.42	75
AT1G07080.1	29.49	28.5
AT1G07090.1	53.33	52.81
AT1G07110.1	27.33	27.39
AT1G07128.1	38.43	38.29
AT1G07135.1	52.5	52.28
AT1G07140.1	43.24	41.67
AT1G07170.1	53	53.27
AT1G07170.2	64.61	66.47
AT1G07170.3	41.3	42.09
AT1G07175.1	70	77.78
AT1G07200.1	23.68	24.3
AT1G07200.2	31.05	31.29
AT1G07210.1	69.37	67.95
AT1G07230.1	45.93	46.35
AT1G07240.1	39.16	39.02
AT1G07250.1	42.12	40.81
AT1G07260.1	31.09	31.8
AT1G07300.1	82.96	84.09
AT1G07310.1	33.93	33.78
AT1G07320.1	42.86	45.04
AT1G07320.2	47.8	48.04
AT1G07320.3	16.43	16.57
AT1G07320.4	28.82	29.7
AT1G07350.1	46.57	45.21
AT1G07350.2	59.24	60.52
AT1G07360.1	52.17	52.06
AT1G07370.1	30.61	31.86
AT1G07420.1	47.95	48.21
AT1G07420.2	42.6	41.74
AT1G07470.1	52.7	52.47
AT1G07480.1	34.08	34.03
AT1G07480.2	44.85	45.27
AT1G07510.1	52.59	52.71
AT1G07520.1	30.87	30.56
AT1G07530.1	41.28	41.55
AT1G07590.1	53.24	54.44
AT1G07600.1	90.7	92.86
AT1G07610.1	21.01	21.97
AT1G07615.1	53.56	54.79
AT1G07630.1	61.82	61.02
AT1G07640.1	43.82	44.32
AT1G07640.2	29.44	29.82
AT1G07640.3	64.55	64.88
AT1G07660.1	87.83	90.18
AT1G07660.2	88.21	88.63
AT1G07670.1	42.43	42.14
AT1G07750.1	48.29	49.24
AT1G07770.1	69.36	72.44
AT1G07770.2	81.62	80.93
AT1G07780.1	39.86	40.44
AT1G07780.2	26.08	25.5
AT1G07780.3	31.93	33.19
AT1G07780.4	47.18	48.5
AT1G07780.5	40.66	41.86
AT1G07790.1	35.71	35.38
AT1G07810.1	29.73	30.48
AT1G07820.1	62.29	61.25
AT1G07820.2	10.1	10.58
AT1G07830.1	89.42	88.51
AT1G07840.1	50	52.07
AT1G07840.2	45.73	46.04
AT1G07840.3	31.45	32.01
AT1G07870.1	23.7	23.27
AT1G07870.2	47.87	48.23
AT1G07880.1	77.59	78.77
AT1G07880.2	50.84	52.23
AT1G07890.1	60.85	61.77
AT1G07890.2	45.43	47.16
AT1G07890.3	65.76	66.77
AT1G07890.4	43.44	43.98
AT1G07890.5	24.93	25.71
AT1G07890.6	72.18	72.85
AT1G07890.7	32.59	32.32
AT1G07890.8	32.51	31.96
AT1G07920.1	43.15	44.44
AT1G07930.1	34.63	34
AT1G07930.2	86.11	86.96
AT1G07940.1	58.27	59.73
AT1G07940.2	50.23	50.46
AT1G07950.1	24.05	23.51
AT1G07960.1	41.37	41.22
AT1G07960.2	43.66	42.72
AT1G07960.3	53.65	52.88
AT1G07980.1	86.97	87.54
AT1G07990.1	56.14	55.05
AT1G08000.1	22.76	22.81
AT1G08000.2	77.33	77.68
AT1G08010.1	28.67	29.2
AT1G08010.2	28.77	28.47
AT1G08030.1	68.9	70.96
AT1G08040.1	39	39.66
AT1G08040.2	37.07	37.37
AT1G08090.1	24.09	23.22
AT1G08110.1	17.76	17.48
AT1G08110.2	55.06	53.67
AT1G08110.3	42.14	42.57
AT1G08110.4	31.32	32.76
AT1G08115.1	37.04	39.22
AT1G08125.1	60.15	60.15
AT1G08125.2	36.92	37.89
AT1G08125.3	48.6	48.2
AT1G08130.1	52.93	53.05
AT1G08160.1	76.69	73.12
AT1G08180.1	76.65	73.56
AT1G08190.1	48.51	49.22
AT1G08200.1	33.08	33.08
AT1G08290.1	70.89	71.26
AT1G08315.1	41.99	42.11
AT1G08320.1	57.58	58.78
AT1G08320.2	59.83	60.09
AT1G08320.3	38.49	40.03
AT1G08340.1	43.1	43.67
AT1G08360.1	33.87	36.81
AT1G08370.1	40.68	39.51
AT1G08380.1	34.82	34.51
AT1G08410.1	37.56	37.12
AT1G08420.1	38.93	39.53
AT1G08420.2	36.42	36.8
AT1G08450.1	58.37	57.91
AT1G08450.2	39.95	39.81
AT1G08450.3	52.47	52.59
AT1G08460.1	53.42	53.54
AT1G08470.1	53.46	53.46
AT1G08480.1	48.43	49
AT1G08510.1	83.31	83.93
AT1G08520.1	45.17	44.46
AT1G08530.1	24.5	24.91
AT1G08540.1	51.52	51.19
AT1G08550.1	46.78	46.7
AT1G08550.2	68.23	69.74
AT1G08560.1	42.75	43.52
AT1G08570.1	45.89	45.68
AT1G08570.2	44.57	44.47
AT1G08570.3	34.74	34.9
AT1G08570.4	56.77	55.61
AT1G08580.1	61.42	62.69
AT1G08590.1	21.67	21.49
AT1G08600.1	40.71	41.01
AT1G08600.2	37.94	38.29
AT1G08600.3	48.34	48.94
AT1G08600.4	52.47	53.12
AT1G08620.1	44.17	44.11
AT1G08620.2	46.33	46.57
AT1G08640.1	71.05	69.95
AT1G08650.1	71.43	71.27
AT1G08650.2	69.29	70.44
AT1G08660.1	27.36	27.36
AT1G08660.2	24.95	25.51
AT1G08680.1	55.22	54.47
AT1G08680.2	53.31	52.28
AT1G08680.3	31.37	30.87
AT1G08680.4	44.15	44.99
AT1G08700.1	44.49	44.57
AT1G08710.1	42.01	42.94
AT1G08710.2	72.59	74.61
AT1G08720.1	41.33	41.91
AT1G08760.1	44.65	45.4
AT1G08780.1	92.47	92.97
AT1G08800.1	49.77	49.08
AT1G08800.2	54.74	54.74
AT1G08820.1	42.83	43.45
AT1G08820.2	68.48	67.6
AT1G08830.1	20.37	20.52
AT1G08830.2	22.35	23.41
AT1G08880.1	68.86	67.97
AT1G08890.1	58.58	59.32
AT1G08930.1	25.57	25.99
AT1G08930.2	33.83	33.83
AT1G08940.1	59.23	57.88
AT1G08970.1	84.42	85.22
AT1G08970.2	37.81	38.02
AT1G08970.3	72.48	74.09
AT1G08970.4	69.47	69.34
AT1G08990.1	59.84	60.31
AT1G09000.1	16.89	16.87
AT1G09010.1	36.53	36.23
AT1G09020.1	35.1	35.05
AT1G09060.1	48.52	48.92
AT1G09060.2	44.25	44.75
AT1G09060.3	37.6	37.95
AT1G09070.1	12.47	11.98
AT1G09100.1	57.17	58.64
AT1G09130.1	56.88	58.65
AT1G09130.2	43.96	44.94
AT1G09130.3	54.13	54.93
AT1G09140.1	52.68	52.55
AT1G09140.2	32.78	34.56
AT1G09150.1	64.13	65.8
AT1G09160.1	26.74	26.91
AT1G09160.2	52.12	52.98
AT1G09200.1	65.54	65.17
AT1G09210.1	71.38	72.28
AT1G09250.1	63.41	61.28
AT1G09270.1	59.21	58.46
AT1G09270.2	58.88	58.36
AT1G09270.3	34.32	34.47
AT1G09280.1	42.41	42.81
AT1G09290.1	44.97	44.97
AT1G09300.2	48.58	48.93
AT1G09310.1	36.12	35.45
AT1G09320.1	18.52	19.44
AT1G09330.1	59.82	58.75
AT1G09415.1	34.55	33.85
AT1G09430.1	67.39	68.02
AT1G09440.1	34.4	35.27
AT1G09460.1	46.46	46.86
AT1G09470.1	52.69	52.13
AT1G09470.2	47.59	46.52
AT1G09486.1	56.84	56.32
AT1G09560.1	45.91	45.04
AT1G09570.1	38	39.25
AT1G09570.2	39.75	41.08
AT1G09575.1	55.04	56.8
AT1G09580.1	58.64	55.81
AT1G09590.1	59.17	57.33
AT1G09620.1	28.67	29.35
AT1G09630.1	48.16	48.65
AT1G09640.1	33.69	35.57
AT1G09640.2	38.73	40.12
AT1G09645.1	42.57	43.44
AT1G09660.1	62.07	65.68
AT1G09660.2	45.91	45.08
AT1G09690.1	69.29	70.46
AT1G09700.1	54.73	55.14
AT1G09730.1	41.17	41.43
AT1G09730.2	53.18	53.29
AT1G09740.1	65.2	63.8
AT1G09750.1	33.96	34.78
AT1G09760.1	36.39	36.97
AT1G09770.1	35.25	35.52
AT1G09780.1	38.96	40.1
AT1G09794.1	97.71	99.22
AT1G09815.1	20.5	20.81
AT1G09830.1	32.77	32.72
AT1G09840.1	64.66	63.8
AT1G09840.2	60.46	59.62
AT1G09840.3	44.95	44.19
AT1G09840.4	60.45	59.93
AT1G09840.5	45.02	43.71
AT1G09840.6	52.66	51.13
AT1G09850.1	36.81	35.86
AT1G09870.1	35.25	35.13
AT1G09910.1	53.12	53.94
AT1G09920.1	51.55	52.2
AT1G09932.1	71.75	70.57
AT1G09932.2	75.06	75.26
AT1G09940.1	51.42	52.38
AT1G09970.1	56.72	56.86
AT1G09970.2	61.99	61.4
AT1G10020.1	65.36	65.76
AT1G10040.1	32.71	32.53
AT1G10040.2	26.31	26.65
AT1G10050.1	46.1	45.59
AT1G10070.1	43.13	43.13
AT1G10070.2	35.21	35.07
AT1G10070.3	42.63	44.05
AT1G10120.1	38.32	39.46
AT1G10130.1	45.37	45.45
AT1G10140.1	41.05	39.83
AT1G10150.1	48.47	48.86
AT1G10170.1	45.5	45.47
AT1G10180.1	70.29	69.76
AT1G10200.1	34.15	35.56
AT1G10230.1	44.88	45.06
AT1G10270.1	37.62	37.45
AT1G10290.1	51.15	51.2
AT1G10310.1	45.33	46.29
AT1G10320.1	40.94	41.01
AT1G10340.1	39.13	39.75
AT1G10340.2	39.42	39.29
AT1G10350.1	34.04	34.85
AT1G10380.1	53.72	53.13
AT1G10390.1	33.97	34.44
AT1G10390.2	59.41	59.88
AT1G10400.1	32.92	33.69
AT1G10410.1	27.59	27.63
AT1G10430.1	55.08	55.84
AT1G10450.1	47.3	47.86
AT1G10470.1	57.01	56.88
AT1G10480.1	62.6	62.47
AT1G10490.1	39.98	39.86
AT1G10500.1	66.67	65.68
AT1G10530.1	81.1	80.87
AT1G10550.1	44.93	46.59
AT1G10580.1	48.41	49.84
AT1G10590.1	95.34	94.33
AT1G10590.2	85.13	84.81
AT1G10590.3	82.04	82.56
AT1G10610.1	28.64	28.46
AT1G10630.1	36.36	36.83
AT1G10650.1	57.76	55.14
AT1G10650.2	74.13	71.37
AT1G10660.1	50.79	50
AT1G10670.1	24.68	26.12
AT1G10670.2	33.03	34.47
AT1G10670.3	39.86	40.8
AT1G10670.4	32.94	34.53
AT1G10682.1	42.07	43.57
AT1G10700.1	29.37	29.84
AT1G10720.1	53.76	56.93
AT1G10730.1	16.47	16.39
AT1G10740.4	37.93	37.17
AT1G10760.1	39.33	38.61
AT1G10820.1	56.91	57.02
AT1G10820.2	62.88	63.01
AT1G10840.1	63.73	64.27
AT1G10840.2	55.95	55.26
AT1G10850.1	49.33	48.52
AT1G10865.1	34.16	32.54
AT1G10865.2	64.84	65.19
AT1G10870.1	42.37	42.89
AT1G10890.1	50.4	49.34
AT1G10900.1	38.5	38.75
AT1G10940.1	63.88	65.22
AT1G10940.2	61.05	61.58
AT1G10950.1	37.15	36.18
AT1G11000.1	50.98	51.76
AT1G11020.1	52.19	52.87
AT1G11050.1	72.46	70.76
AT1G11080.1	42.55	45.04
AT1G11080.2	38.42	40.68
AT1G11170.1	35.35	34.55
AT1G11170.2	66.71	66.81
AT1G11185.1	31.52	30.59
AT1G11210.1	54.52	54.24
AT1G11220.1	54.18	54.81
AT1G11240.1	92.28	91.92
AT1G11260.1	41.67	42.13
AT1G11280.1	40.65	41.16
AT1G11280.2	54.73	55.54
AT1G11280.3	50.89	51.88
AT1G11280.4	46.7	47.56
AT1G11310.1	21.55	21.34
AT1G11310.2	27.23	27.62
AT1G11360.1	53.81	55.12
AT1G11360.2	54.09	53.83
AT1G11360.3	59.18	58.05
AT1G11360.4	53.33	53.08
AT1G11380.1	55.15	56.57
AT1G11400.1	51.76	50.94
AT1G11400.2	46.46	46.75
AT1G11400.3	53.2	53.56
AT1G11430.1	86.05	86.05
AT1G11440.1	17.87	17.43
AT1G11450.1	64.44	62.82
AT1G11450.2	48.07	49.09
AT1G11475.1	70.86	72.51
AT1G11480.1	48.81	48.51
AT1G11480.2	40.8	41.04
AT1G11530.1	42.29	40.09
AT1G11540.1	46.05	48.18
AT1G11545.1	63.39	63.04
AT1G11580.1	66.95	67.52
AT1G11592.1	71.67	70.47
AT1G11592.2	48.92	47.76
AT1G11650.1	65.89	65.95
AT1G11650.2	65.3	65.49
AT1G11660.1	36.43	36.43
AT1G11670.1	37.9	38.14
AT1G11680.1	74.33	74.08
AT1G11750.1	41.13	40.83
AT1G11750.2	43.98	44.39
AT1G11760.1	36.88	36.49
AT1G11840.1	61.43	61.27
AT1G11840.2	47.28	48.25
AT1G11840.3	58.46	58.75
AT1G11840.4	74.21	74.03
AT1G11840.5	38.84	38.13
AT1G11840.6	60.34	60.34
AT1G11860.1	40.97	40.26
AT1G11860.2	37.67	37.45
AT1G11860.3	56.83	57.81
AT1G11890.1	48.64	48.79
AT1G11905.1	29.7	29.54
AT1G11910.1	22.03	21.63
AT1G11930.1	73.86	73.65
AT1G11930.2	77.29	76.65
AT1G11960.1	44	43.49
AT1G12000.1	47.42	48.2
AT1G12010.1	68.7	69.23
AT1G12020.1	38.36	38.75
AT1G12040.1	58.8	57.79
AT1G12050.1	40.97	42.34
AT1G12060.1	41.97	42.41
AT1G12080.1	19.1	19.32
AT1G12080.2	98.65	98.21
AT1G12090.1	85.66	85.34
AT1G12110.1	34.24	34.15
AT1G12120.1	43.62	44.33
AT1G12140.1	38.4	38.92
AT1G12140.2	24.7	24.51
AT1G12160.1	42.83	42.99
AT1G12200.1	34.39	35.2
AT1G12230.1	57.06	57.64
AT1G12230.2	51.28	51.85
AT1G12240.1	29.46	28.98
AT1G12270.1	45.56	45.56
AT1G12310.1	48.42	46.62
AT1G12320.1	39.23	38.93
AT1G12360.1	37.17	37.36
AT1G12390.1	40.07	40.07
AT1G12400.1	43.59	44.74
AT1G12410.1	39.65	38.42
AT1G12420.1	36.75	36.33
AT1G12430.1	34.38	34.31
AT1G12430.2	31.04	31.04
AT1G12440.1	32.3	32.91
AT1G12440.2	42.73	42.73
AT1G12470.1	52	51.61
AT1G12500.1	70.77	70.91
AT1G12520.1	71.03	70.64
AT1G12520.2	38.74	37.47
AT1G12520.3	64.03	62.59
AT1G12530.1	55.67	55.12
AT1G12580.1	47.89	48.42
AT1G12650.1	60.48	60.48
AT1G12650.2	41.96	41.62
AT1G12650.3	28.33	28.18
AT1G12650.4	33.91	32.87
AT1G12680.1	29.91	29.91
AT1G12750.1	57.52	56.9
AT1G12750.2	59.28	58.5
AT1G12750.3	59.43	58.66
AT1G12760.1	43.64	44.07
AT1G12760.2	54.97	56.79
AT1G12770.1	55.82	55.98
AT1G12780.1	34.33	35.98
AT1G12810.1	54.59	51.44
AT1G12810.2	47.17	45.96
AT1G12820.1	41.55	42.64
AT1G12830.1	74.01	72.18
AT1G12840.1	44.99	46.08
AT1G12850.1	78.29	79.84
AT1G12880.1	61.21	61.03
AT1G12910.1	61.57	61.57
AT1G12920.1	55.07	55.88
AT1G12930.1	41.65	41.01
AT1G12970.1	54.91	55.51
AT1G13000.1	60.69	58.98
AT1G13000.2	43.62	43.13
AT1G13020.1	62.79	63.76
AT1G13030.1	57.02	57.02
AT1G13060.1	83.96	81.77
AT1G13060.2	23.72	22.99
AT1G13090.1	37.85	38.13
AT1G13110.1	64.67	65.83
AT1G13120.1	72.89	74.34
AT1G13160.1	17.58	17.48
AT1G13170.1	24.36	24.46
AT1G13170.2	57.03	56.96
AT1G13190.1	30	29.32
AT1G13210.1	25.73	25.39
AT1G13220.1	45.48	44.82
AT1G13220.2	69.3	70.53
AT1G13245.1	56.06	57.22
AT1G13250.1	37.23	36.67
AT1G13260.1	44.42	46.46
AT1G13280.1	33.07	32.22
AT1G13300.1	45.45	44.08
AT1G13320.1	51.61	52.07
AT1G13320.2	59.91	60.44
AT1G13320.3	45.74	46.26
AT1G13340.1	46.2	45.82
AT1G13350.1	57.37	57.07
AT1G13350.2	28.72	28.18
AT1G13360.1	88.4	89.81
AT1G13360.2	36.69	37.45
AT1G13360.3	54.82	54.11
AT1G13380.1	10.92	11.06
AT1G13390.1	30.62	30.05
AT1G13390.2	55.83	58.14
AT1G13420.1	36.46	37.23
AT1G13430.1	55.58	56.14
AT1G13440.1	59.66	60.78
AT1G13440.2	73.51	73.51
AT1G13450.1	49.03	49.7
AT1G13450.2	67.32	67.98
AT1G13450.3	43.68	43.45
AT1G13460.1	45.6	44.66
AT1G13460.2	41.3	40.74
AT1G13480.1	40.23	40.05
AT1G13520.1	41.47	41.57
AT1G13530.1	33.25	33.42
AT1G13560.1	34.71	33.94
AT1G13560.2	52.61	52.04
AT1G13590.1	48.57	48.23
AT1G13600.1	79.06	78.24
AT1G13620.1	69.19	71.73
AT1G13640.1	71.22	71.57
AT1G13670.1	49.8	51.46
AT1G13690.1	42.34	43.45
AT1G13730.1	51.9	51.99
AT1G13740.1	17.35	17.65
AT1G13830.1	30.65	32.39
AT1G13870.1	59.26	59.89
AT1G13880.1	35.88	35.69
AT1G13900.1	28.96	29.07
AT1G13920.1	70.53	69.61
AT1G13930.1	53.3	52.56
AT1G13930.2	45.22	46.85
AT1G13930.3	56.45	56
AT1G13950.1	35.42	37.28
AT1G13960.1	40.99	41.06
AT1G13960.2	24.88	25.08
AT1G13970.1	42.53	42.41
AT1G13980.1	44.6	44.4
AT1G13980.2	40.08	40.11
AT1G13990.1	32.34	33.03
AT1G13990.2	68.3	64.13
AT1G14000.1	46.54	46.05
AT1G14010.1	35.23	36.53
AT1G14040.1	34.24	35.03
AT1G14060.1	67.32	65.04
AT1G14120.1	58.49	59.1
AT1G14140.1	74.36	74.74
AT1G14160.1	41.55	42.86
AT1G14170.1	54.11	55.54
AT1G14170.2	43.39	44.85
AT1G14170.3	39.68	40.62
AT1G14190.1	36.83	36.5
AT1G14200.1	24.91	25.56
AT1G14210.1	48.21	51.92
AT1G14230.1	48.5	50
AT1G14290.1	68.49	69.5
AT1G14300.1	54.39	54.04
AT1G14300.2	45.65	45.83
AT1G14320.1	88.57	88.01
AT1G14320.2	36.72	36.86
AT1G14330.1	36.2	36.3
AT1G14340.1	49.12	50
AT1G14350.1	58.28	59.32
AT1G14350.2	60.03	60.03
AT1G14360.1	32.09	32.23
AT1G14380.1	43.15	42.51
AT1G14380.2	40.41	40.41
AT1G14380.3	44.31	44.03
AT1G14400.1	50.8	50.48
AT1G14400.2	50.76	51.95
AT1G14450.1	87.36	88.89
AT1G14510.1	31.76	32.3
AT1G14570.1	47.72	47.64
AT1G14570.2	53.25	53.16
AT1G14570.3	52.47	52.18
AT1G14570.4	46.72	45.77
AT1G14610.1	52.88	53.11
AT1G14620.1	74.52	73.82
AT1G14620.2	75.72	74.29
AT1G14630.1	93.5	93.12
AT1G14640.1	31.91	33.72
AT1G14650.1	45.5	45.55
AT1G14650.2	54.47	55.65
AT1G14670.1	51.57	51.42
AT1G14685.1	42.08	43.21
AT1G14685.2	31.17	31.91
AT1G14685.3	38.67	39.02
AT1G14690.1	30.13	30.16
AT1G14690.2	36.41	36.81
AT1G14710.1	26.63	26.25
AT1G14710.2	44.35	44.4
AT1G14720.1	68.11	68.74
AT1G14730.1	85.95	86.23
AT1G14740.1	46.89	47.52
AT1G14810.1	61.83	62.5
AT1G14830.1	31.43	31.59
AT1G14870.1	72.88	71.37
AT1G14890.1	43.18	45.08
AT1G14900.1	57.91	58.65
AT1G14910.1	24.41	23.87
AT1G14980.1	45.5	47.87
AT1G15000.1	54.24	55.41
AT1G15020.1	64.43	64.97
AT1G15020.2	55.14	54.02
AT1G15040.1	47.76	47.97
AT1G15040.2	35.17	36.09
AT1G15060.1	41.54	41.73
AT1G15100.1	46.92	48.41
AT1G15110.1	49.15	48.08
AT1G15110.2	59.73	58.78
AT1G15120.1	16.84	17.39
AT1G15120.2	55.51	56.2
AT1G15125.1	23.81	23.51
AT1G15130.1	47.99	47.99
AT1G15200.1	50.31	49.79
AT1G15200.2	51.71	52.24
AT1G15200.3	31.65	31.35
AT1G15200.4	32.62	32.12
AT1G15210.1	53.91	54.02
AT1G15230.1	52.66	53.29
AT1G15250.1	59.88	59.17
AT1G15270.1	84.62	85.82
AT1G15280.1	53.18	54.06
AT1G15280.2	52.32	52.82
AT1G15310.1	42.67	41.61
AT1G15340.1	94.92	95.35
AT1G15340.2	87.25	86.82
AT1G15350.1	48.78	51.28
AT1G15350.2	46.45	48.32
AT1G15350.3	78.25	74.83
AT1G15370.1	92.62	93.36
AT1G15380.1	46.79	47.56
AT1G15380.2	59.27	61.51
AT1G15390.1	70.38	72.51
AT1G15400.1	35.07	35.07
AT1G15400.2	54.88	54.63
AT1G15400.3	41.86	40.54
AT1G15405.1	62	60.19
AT1G15420.1	63.9	65.2
AT1G15430.1	54.05	53.33
AT1G15440.1	65.81	64.92
AT1G15470.1	61.95	65.55
AT1G15480.1	42.79	42.28
AT1G15500.1	44.68	45.38
AT1G15530.1	28.46	28.64
AT1G15550.1	35.5	35.31
AT1G15570.1	58.36	58.97
AT1G15660.1	39.97	39.59
AT1G15670.1	25.49	26.01
AT1G15690.1	45.72	45.12
AT1G15690.2	39.1	40.05
AT1G15700.1	32.62	33.5
AT1G15710.1	50.24	50.61
AT1G15720.1	35.91	36.06
AT1G15740.1	56.75	57.28
AT1G15750.1	34.18	35.61
AT1G15750.2	31.67	32.99
AT1G15750.3	43.72	44.68
AT1G15750.4	32.49	34
AT1G15780.1	26.9	26.94
AT1G15810.1	38.18	37.65
AT1G15820.1	77.63	74.94
AT1G15860.1	33.06	34.59
AT1G15860.2	58.51	58.4
AT1G15860.3	33.33	34.09
AT1G15880.1	47.2	45.85
AT1G15910.1	34.23	34.86
AT1G15920.1	19.45	19.75
AT1G15920.2	26.62	26.72
AT1G15930.1	43.31	44.09
AT1G15930.2	31.94	32.81
AT1G15940.1	39.48	40.04
AT1G15950.1	59.4	58.47
AT1G15950.2	24.76	24.41
AT1G15970.1	44.28	44.28
AT1G16000.1	69.64	70.48
AT1G16010.1	44.11	44.18
AT1G16010.2	41.76	41.36
AT1G16010.3	36.97	38
AT1G16040.1	32.97	32.74
AT1G16060.1	44.44	43.5
AT1G16060.2	64.47	65.48
AT1G16170.1	32.87	33.97
AT1G16180.1	53.2	53.6
AT1G16180.2	57.41	57.2
AT1G16190.1	43.56	44.55
AT1G16210.1	38.85	37.7
AT1G16220.1	49.25	50.33
AT1G16240.1	80.99	84
AT1G16240.2	55.74	59.58
AT1G16240.3	80.66	83.91
AT1G16270.1	34.69	34.93
AT1G16270.2	43.34	44.06
AT1G16300.1	56.68	57.23
AT1G16340.1	52.84	53.25
AT1G16340.2	52.22	52.49
AT1G16340.3	29.17	29.17
AT1G16340.4	65.56	65.87
AT1G16350.1	24.86	23.96
AT1G16400.1	56.46	56.37
AT1G16460.1	51.96	50.6
AT1G16460.2	58.6	55.46
AT1G16460.3	58.19	56.53
AT1G16460.4	59.55	57
AT1G16470.1	63.45	64.78
AT1G16470.2	25.31	27.18
AT1G16520.1	29.34	30.15
AT1G16530.1	84.77	83.5
AT1G16560.1	20	19.74
AT1G16560.2	22.59	22.11
AT1G16560.3	29.34	29.26
AT1G16560.4	20.47	20.43
AT1G16610.1	42.41	42.95
AT1G16610.2	46.91	45.05
AT1G16610.3	44	42.67
AT1G16630.1	31.81	31.99
AT1G16670.1	40.91	41.49
AT1G16680.1	48.46	47.92
AT1G16700.1	79.45	81.92
AT1G16740.1	57.39	56.74
AT1G16810.1	50.87	53.92
AT1G16810.2	56.76	58.41
AT1G16840.1	28.03	29.02
AT1G16840.2	43.37	43.26
AT1G16840.3	29.03	28.92
AT1G16840.4	41.95	43.1
AT1G16858.1	54.71	53.72
AT1G16860.1	54.71	53.72
AT1G16870.1	34.46	33.74
AT1G16880.1	43.28	43.07
AT1G16890.1	26.25	25.93
AT1G16890.2	46.44	46.79
AT1G16890.3	55.63	56.91
AT1G16916.1	87.74	84.47
AT1G16920.1	78.45	80.43
AT1G17060.1	66.61	66.72
AT1G17070.1	41.03	40.61
AT1G17080.1	9.29	8.79
AT1G17110.1	43.37	44.11
AT1G17110.2	51.7	52.81
AT1G17130.1	81.09	81.5
AT1G17130.2	76.89	76.89
AT1G17140.1	33.74	35.03
AT1G17140.2	44.12	45.81
AT1G17145.1	45.2	45.9
AT1G17160.1	49.89	50
AT1G17160.2	63.76	63.92
AT1G17170.1	42.18	43.66
AT1G17190.1	31.56	30.94
AT1G17210.1	26.46	26.93
AT1G17220.1	37.62	37.59
AT1G17280.1	44.69	45.56
AT1G17280.2	31.63	31.91
AT1G17290.1	32.53	31.67
AT1G17330.1	44.33	45.39
AT1G17340.1	50.57	50.57
AT1G17350.1	56.25	58.25
AT1G17360.1	36.77	37.27
AT1G17370.1	53.45	54.03
AT1G17370.2	59.75	59.33
AT1G17380.1	37.28	36.95
AT1G17430.1	47.09	44.97
AT1G17440.1	33.15	31.68
AT1G17440.2	44.97	43.87
AT1G17455.1	86.57	87.81
AT1G17455.2	79.93	81.68
AT1G17470.1	43.82	44.99
AT1G17470.2	38.91	37.14
AT1G17490.1	64.6	61.18
AT1G17500.1	65.66	65.97
AT1G17510.1	70.14	70.48
AT1G17520.1	24.14	24.42
AT1G17530.1	76.63	75.08
AT1G17550.1	38.53	38.2
AT1G17580.1	46.23	46.46
AT1G17620.1	22.01	22.73
AT1G17665.1	38.06	38.87
AT1G17680.1	39.44	38.41
AT1G17680.2	39.93	39.25
AT1G17690.1	49.28	49.88
AT1G17720.1	50.36	51.39
AT1G17720.2	53.13	54.31
AT1G17730.1	40.36	40.36
AT1G17745.1	53.9	53.61
AT1G17745.2	59.87	59.7
AT1G17760.1	35.78	35.29
AT1G17780.2	21.65	21.05
AT1G17820.1	35.02	34.46
AT1G17860.1	37.1	36.77
AT1G17880.1	77.16	78.85
AT1G17890.1	63.45	61.88
AT1G17890.2	52.36	52.7
AT1G17890.3	76.91	77.43
AT1G17930.1	60	59.91
AT1G17980.1	39.69	39.07
AT1G17980.2	49.32	50
AT1G18030.1	39.36	39.7
AT1G18030.2	46.19	46.78
AT1G18060.1	33.64	33.95
AT1G18070.1	64.09	63.99
AT1G18070.2	49.12	49.12
AT1G18070.3	43.7	44.08
AT1G18080.1	47.6	48.48
AT1G18150.1	35.59	36.65
AT1G18150.2	31.27	31.88
AT1G18150.3	35.48	37.01
AT1G18160.1	31.9	31.79
AT1G18190.1	40.6	40.57
AT1G18210.1	42.26	41.79
AT1G18210.2	20.48	20.67
AT1G18250.1	27.34	25.65
AT1G18250.2	41.88	39.07
AT1G18260.1	55.56	56.42
AT1G18270.1	46.3	46.94
AT1G18270.2	49.1	49.55
AT1G18270.3	43.29	43.85
AT1G18300.1	77.88	78.34
AT1G18370.1	30.44	31.02
AT1G18450.1	56.14	56.79
AT1G18470.1	61.26	61.16
AT1G18470.2	76.8	76.44
AT1G18480.1	76.56	76.23
AT1G18490.1	62.66	62.08
AT1G18500.1	64.55	63.9
AT1G18540.1	54.69	52.04
AT1G18570.1	44.97	44.63
AT1G18580.1	24.71	24.93
AT1G18590.1	44.44	43.86
AT1G18630.1	63.93	63.67
AT1G18660.1	37.9	37.79
AT1G18660.2	54.11	54.29
AT1G18660.3	31.26	31.31
AT1G18660.4	45.98	46.51
AT1G18670.1	34.54	34.41
AT1G18700.1	32.47	32.18
AT1G18700.2	23.86	23.29
AT1G18700.3	52.76	52.76
AT1G18700.4	24.51	24.39
AT1G18720.1	35.42	34.91
AT1G18740.1	43.43	44.88
AT1G18800.1	58.29	60.35
AT1G18840.1	43.91	45.2
AT1G18840.2	29.33	28.72
AT1G18850.1	59.59	60.08
AT1G18860.1	63.72	64.02
AT1G18880.1	60.45	59.43
AT1G18890.1	56.69	56.09
AT1G18950.1	55.23	54.77
AT1G18970.1	64.68	63.92
AT1G19000.1	43.75	43.44
AT1G19000.2	35.33	35.62
AT1G19010.1	40.56	42.29
AT1G19010.2	51.55	51.41
AT1G19020.1	32.26	34.01
AT1G19050.1	46.95	49.6
AT1G19080.1	35.28	36.21
AT1G19080.2	52.91	56.51
AT1G19110.1	36.5	36.86
AT1G19120.1	62.2	63.71
AT1G19130.1	63.06	61.9
AT1G19180.1	36.21	35.59
AT1G19180.2	35.31	35.46
AT1G19220.1	45.02	44.71
AT1G19240.1	46.08	48.31
AT1G19300.1	55.58	54.85
AT1G19310.1	75.07	76.9
AT1G19350.1	44.9	45.83
AT1G19350.3	36.32	36.56
AT1G19350.4	66.88	66.88
AT1G19350.5	29.81	29.62
AT1G19350.6	34.14	33.89
AT1G19360.1	32.38	31.43
AT1G19370.1	45.14	45.43
AT1G19396.1	54.05	55.17
AT1G19396.3	46.84	46.79
AT1G19397.1	45.85	45.67
AT1G19400.1	58.69	57.67
AT1G19400.2	46.75	45.01
AT1G19430.1	20.44	20.54
AT1G19440.1	33.08	33.03
AT1G19485.1	39.37	39.8
AT1G19485.2	22.46	22.95
AT1G19520.1	12.42	12.28
AT1G19520.2	30.66	31.42
AT1G19530.1	42.48	44.04
AT1G19550.1	31.25	29.41
AT1G19570.1	33.68	34.39
AT1G19570.2	43.66	45.42
AT1G19580.1	58.82	59.63
AT1G19580.2	50.43	48.85
AT1G19600.1	45.82	46.22
AT1G19660.1	32.78	33.98
AT1G19660.2	55.31	56.1
AT1G19690.1	31.81	31.81
AT1G19700.1	51.16	51.08
AT1G19700.2	79.75	78.21
AT1G19700.3	67.6	65.85
AT1G19710.1	42.19	42.65
AT1G19730.1	37.66	37.66
AT1G19740.1	47.4	46.38
AT1G19770.1	27.45	27.79
AT1G19800.1	39.74	39.74
AT1G19800.2	52.14	52.35
AT1G19800.3	48.69	49.28
AT1G19835.1	28.05	27.87
AT1G19835.2	30.01	30.24
AT1G19870.1	31.3	31.03
AT1G19880.1	20.9	21.51
AT1G19910.1	37.96	38.24
AT1G19920.1	46.67	47.23
AT1G19950.1	70.79	71.14
AT1G19990.1	27.52	28.06
AT1G20010.1	71.09	71.22
AT1G20015.1	100	100
AT1G20050.1	31.91	33.22
AT1G20090.1	56.59	59.64
AT1G20100.1	28.54	29.3
AT1G20100.2	30.81	31.69
AT1G20110.1	23.1	22.85
AT1G20140.1	49.78	50.88
AT1G20160.1	35.22	36.2
AT1G20160.2	46.45	47.94
AT1G20190.1	71.71	69.38
AT1G20200.1	68.29	67.08
AT1G20220.1	92.67	94.36
AT1G20225.1	75.26	76.04
AT1G20260.1	40.46	39.87
AT1G20270.1	73.59	72.77
AT1G20300.1	65.51	66.56
AT1G20330.1	75.47	75.78
AT1G20340.1	73.5	74.68
AT1G20370.1	64.7	64.6
AT1G20410.1	33.82	34.76
AT1G20430.1	68.22	68.22
AT1G20440.1	72.3	73.31
AT1G20450.1	32.83	34.32
AT1G20450.2	67.73	67.88
AT1G20460.1	71.23	68.87
AT1G20510.1	31.14	31.24
AT1G20510.2	38.19	38.25
AT1G20560.1	31.55	30.8
AT1G20560.2	36.34	35.63
AT1G20575.1	10.85	11.49
AT1G20580.1	70.43	71.26
AT1G20590.1	25	26.63
AT1G20610.1	39.05	39.4
AT1G20620.1	45.15	45.15
AT1G20620.2	41.81	42.15
AT1G20620.4	47.86	48.34
AT1G20620.5	51.6	51.42
AT1G20630.1	35.65	35.98
AT1G20670.1	39.7	39.97
AT1G20693.1	9.51	9.97
AT1G20693.2	33.44	34.95
AT1G20693.3	9.54	9.97
AT1G20696.1	44.93	48.54
AT1G20696.2	45.42	49.45
AT1G20696.3	55.63	53.56
AT1G20700.1	35.32	35.04
AT1G20760.1	53.62	54.38
AT1G20770.1	34.97	34.97
AT1G20840.1	58.77	59.18
AT1G20850.1	56.43	56.43
AT1G20900.1	43.8	44.92
AT1G20920.1	38.25	38.65
AT1G20920.2	35.32	36.16
AT1G20930.1	60.1	60.87
AT1G20950.1	45.06	45.32
AT1G20970.1	29.01	29.28
AT1G20980.1	37.44	36.94
AT1G21000.1	40.88	41.9
AT1G21000.2	41.19	42.24
AT1G21050.1	31.93	30.95
AT1G21065.1	30.53	31.13
AT1G21080.1	27.94	28.34
AT1G21080.2	37.83	37.75
AT1G21080.3	49.15	48.74
AT1G21090.1	52.97	55.37
AT1G21100.1	37.02	36.36
AT1G21110.1	36.18	35.48
AT1G21120.1	39.87	38.58
AT1G21130.1	78.76	78.25
AT1G21130.2	52.31	53.06
AT1G21140.1	27.59	28.88
AT1G21160.1	39.22	39.56
AT1G21170.1	34.6	34.29
AT1G21190.1	53.15	56.19
AT1G21200.1	40.68	40.27
AT1G21210.1	44.38	45.58
AT1G21310.1	27.69	29.03
AT1G21370.1	39.1	39.1
AT1G21370.2	71.86	72.29
AT1G21380.1	20.83	20.8
AT1G21390.1	43.04	43.73
AT1G21440.1	48.97	49.74
AT1G21450.1	43.81	44.15
AT1G21560.1	45.21	46.44
AT1G21560.2	17.78	17.08
AT1G21560.3	16.58	16.23
AT1G21600.1	63.33	61.78
AT1G21600.2	71.9	70.23
AT1G21610.1	43.84	44.18
AT1G21610.2	55.27	56.09
AT1G21610.3	45.6	45.84
AT1G21630.1	45.74	45.04
AT1G21630.2	50	50.4
AT1G21640.1	41.47	40.38
AT1G21640.2	43.02	42.79
AT1G21660.1	49.62	49.92
AT1G21680.1	22.28	22.57
AT1G21700.1	45.9	46.22
AT1G21710.1	43.93	45.02
AT1G21720.1	26.43	25.61
AT1G21730.1	51.83	50.87
AT1G21740.1	51.93	52.09
AT1G21750.1	25.08	25.8
AT1G21750.2	35.8	35.88
AT1G21760.1	55.63	56.7
AT1G21770.1	65.32	64.57
AT1G21780.1	46.43	46.14
AT1G21780.2	40.88	41.24
AT1G21790.1	22.41	22.58
AT1G21830.1	72.4	72.4
AT1G21880.1	47.33	46.97
AT1G21880.2	35.9	36.29
AT1G21900.1	82.51	81.18
AT1G21910.1	55.36	54.11
AT1G21920.1	67.07	68.37
AT1G21930.1	95.29	97.59
AT1G21980.1	38.74	38.3
AT1G22030.1	79.63	80.37
AT1G22065.1	87.76	83.5
AT1G22070.1	35.63	35.38
AT1G22190.1	71.31	70.73
AT1G22200.1	37.06	36.78
AT1G22200.2	48.8	48.44
AT1G22220.1	33.42	34.17
AT1G22230.1	77.84	77.02
AT1G22270.1	33.64	34.91
AT1G22280.1	34.59	35.03
AT1G22280.2	47.64	47.44
AT1G22280.3	62.85	61.28
AT1G22300.1	84.13	83.29
AT1G22300.2	75.71	76.1
AT1G22300.3	53.48	53.79
AT1G22310.1	39.08	39.23
AT1G22310.2	54.53	53.99
AT1G22330.1	37.53	37.73
AT1G22360.1	74.46	73.81
AT1G22360.2	42.51	42.15
AT1G22410.1	72.25	71.86
AT1G22440.1	35.03	34.61
AT1G22450.1	59.8	61.03
AT1G22470.1	64.74	62.73
AT1G22500.1	39.53	39.78
AT1G22520.1	75.11	73.78
AT1G22520.2	60.29	60.29
AT1G22530.1	52.18	52.86
AT1G22620.1	44.9	46.38
AT1G22640.1	36.13	34.77
AT1G22700.2	52.38	51.3
AT1G22710.1	68.77	69.81
AT1G22730.1	55.88	55.3
AT1G22740.1	35.08	36.98
AT1G22780.1	89.8	91.67
AT1G22790.1	76.79	78.73
AT1G22790.2	76.9	79.53
AT1G22800.1	52.24	51.1
AT1G22840.1	42.41	42.79
AT1G22840.2	59.57	61.43
AT1G22882.1	36.41	35.97
AT1G22885.1	20.39	20.67
AT1G22885.2	27	25
AT1G22910.1	68.51	68.21
AT1G22910.2	71.39	69.25
AT1G22910.3	62.5	63.74
AT1G22920.1	33.55	34.36
AT1G22930.1	44.1	44.38
AT1G22930.2	39.86	40.58
AT1G22950.1	57.03	56.91
AT1G22990.1	48.51	46.89
AT1G23020.1	29.24	28.55
AT1G23020.2	59.15	58.33
AT1G23030.1	52.25	52.11
AT1G23040.1	80.85	79.72
AT1G23080.1	38.74	38.74
AT1G23080.2	40.29	40.42
AT1G23080.3	24.54	24.27
AT1G23100.1	48.86	46.49
AT1G23120.1	51.75	51.75
AT1G23149.1	71.05	70.64
AT1G23150.1	71.05	70.64
AT1G23190.1	45.18	44.54
AT1G23205.1	67.67	68.44
AT1G23220.1	55.96	57.2
AT1G23260.1	90.76	89.33
AT1G23280.1	32.67	32.56
AT1G23290.1	72.64	77.66
AT1G23310.1	56.04	56.2
AT1G23310.2	50.15	49.42
AT1G23330.1	29.23	30.02
AT1G23380.1	52.52	51.69
AT1G23380.2	69.86	68.89
AT1G23390.1	43.08	44.27
AT1G23400.1	42.27	42.05
AT1G23410.1	30.53	30.21
AT1G23440.1	19.33	19.21
AT1G23490.1	67.49	67.49
AT1G23530.1	21.94	21.21
AT1G23560.1	32.2	31.21
AT1G23710.1	53.57	55.26
AT1G23720.1	65.77	65.04
AT1G23750.1	65.54	64.34
AT1G23780.1	37.99	37.26
AT1G23800.1	36.08	36.93
AT1G23820.1	54.59	54.1
AT1G23820.2	53.98	53.63
AT1G23850.1	38.96	40.08
AT1G23860.1	18.54	18.16
AT1G23860.2	32.87	32.56
AT1G23860.3	15.62	15.73
AT1G23860.4	25.57	25.41
AT1G23870.1	64.83	64.56
AT1G23890.2	63.37	62.29
AT1G23900.1	44	43.27
AT1G23900.2	41.71	41.6
AT1G23950.1	37.61	37.69
AT1G23950.2	49.3	49.3
AT1G23950.3	34.19	33.72
AT1G23950.4	36.71	36.07
AT1G23950.5	46.23	46
AT1G23960.1	52.68	52.43
AT1G23960.2	71.46	71.94
AT1G23970.1	62.47	63.81
AT1G23970.2	48.85	50.24
AT1G24050.1	53.92	52.96
AT1G24100.1	47.55	47.84
AT1G24120.1	36.67	35.18
AT1G24150.1	28.47	27.94
AT1G24160.1	53.74	53.14
AT1G24160.2	51.47	52.23
AT1G24170.1	45.07	45.66
AT1G24180.1	51.38	51.49
AT1G24190.1	41.93	42.49
AT1G24190.2	51.49	52.77
AT1G24240.1	36.33	37.1
AT1G24267.1	51.33	49.91
AT1G24267.2	47.7	47.71
AT1G24280.1	63.1	63.77
AT1G24300.1	29.63	30.2
AT1G24300.2	30.12	30.85
AT1G24310.1	19.44	19.65
AT1G24350.1	70.45	71.01
AT1G24350.2	39.06	39.81
AT1G24350.3	53.82	54.58
AT1G24360.1	63.72	64.14
AT1G24450.1	34.11	33.21
AT1G24490.1	56.13	55.76
AT1G24490.2	71.74	71.23
AT1G24510.1	71.72	72.28
AT1G24510.2	51.44	52.59
AT1G24560.1	46.42	46.47
AT1G24575.1	72.05	75.32
AT1G24600.1	38.58	39.2
AT1G24620.1	33.47	32.8
AT1G24625.1	61.4	63.72
AT1G24764.1	48.73	50
AT1G24793.1	42.49	43.04
AT1G24793.2	29.02	29.1
AT1G24800.1	40.08	39.92
AT1G24807.1	61.84	62.67
AT1G24851.1	56.31	55.77
AT1G24880.1	47.96	47.53
AT1G24880.2	21.81	23.16
AT1G24880.3	44.17	46.67
AT1G24881.1	40	39.53
AT1G24909.1	58.56	61.32
AT1G25025.1	33.17	34.01
AT1G25054.1	48.67	48.56
AT1G25054.2	37.32	38.59
AT1G25055.1	75.56	74.04
AT1G25083.1	59.84	60.57
AT1G25098.1	74.18	75.96
AT1G25098.2	29.48	31.76
AT1G25112.1	33.17	34.01
AT1G25145.1	47.3	46.23
AT1G25150.1	41.94	41.86
AT1G25155.1	58.56	61.32
AT1G25175.1	10.29	10.05
AT1G25180.1	33.17	34.01
AT1G25210.1	51.35	52.53
AT1G25210.2	42.89	42.79
AT1G25211.1	65.73	63.06
AT1G25220.1	38.02	39.14
AT1G25220.2	54.19	54.75
AT1G25230.1	37.01	36.39
AT1G25250.1	34.2	32.69
AT1G25260.1	61.52	65.7
AT1G25275.1	67.12	68.53
AT1G25275.2	63.45	68.66
AT1G25275.3	34.19	36.3
AT1G25280.1	44.91	44.64
AT1G25280.2	29.02	29.2
AT1G25280.3	36.21	36.61
AT1G25350.1	41.32	41.97
AT1G25350.2	39.98	39.55
AT1G25370.1	25.27	24.93
AT1G25380.1	27.55	26.59
AT1G25400.1	32.71	32.78
AT1G25400.2	40.72	39.95
AT1G25420.1	70.33	71.16
AT1G25420.2	54.83	54.71
AT1G25420.3	57.75	57.34
AT1G25422.1	77.05	77.47
AT1G25490.1	51.45	52.2
AT1G25510.1	65.91	65.29
AT1G25520.1	26.13	25.74
AT1G25530.1	41.86	41.71
AT1G25540.1	42.26	41.59
AT1G25540.2	53.89	53.44
AT1G25550.1	31.12	30.61
AT1G25560.1	46.08	45.98
AT1G25570.1	33.25	32.87
AT1G25580.1	27.67	26.43
AT1G25682.1	60.21	60.21
AT1G25988.1	42.04	41.77
AT1G26110.1	41.98	41.29
AT1G26110.2	47.13	46.55
AT1G26150.1	47.4	47.62
AT1G26240.1	48.18	46.7
AT1G26250.1	60	60.38
AT1G26260.1	19.07	19.81
AT1G26260.2	72.41	73.91
AT1G26260.3	33.49	32.27
AT1G26270.1	60.96	61.68
AT1G26300.1	36.39	35.76
AT1G26300.2	40.98	42.41
AT1G26340.1	34.21	33.33
AT1G26440.1	55.34	55.95
AT1G26440.2	37.79	38.05
AT1G26440.3	43.15	43.23
AT1G26440.4	70.37	70.53
AT1G26450.1	24.45	24.3
AT1G26460.1	70.29	70.48
AT1G26470.1	55.05	54.3
AT1G26520.1	62.27	63.21
AT1G26550.1	72.37	71.12
AT1G26580.1	40.47	41.31
AT1G26620.1	33.75	35.13
AT1G26630.1	28.83	28.93
AT1G26630.2	36.15	36.77
AT1G26640.1	25	24.5
AT1G26660.1	39.37	38.76
AT1G26660.2	62.1	62.86
AT1G26665.1	56.63	59.49
AT1G26665.2	42.15	40.8
AT1G26670.1	34.92	35.92
AT1G26690.1	29.56	30.92
AT1G26740.1	46.98	44.67
AT1G26750.1	24.54	24.1
AT1G26760.1	47.52	48.56
AT1G26800.1	27.43	28.11
AT1G26830.1	49.09	48.73
AT1G26850.1	39.62	40.49
AT1G26850.2	53.33	52.93
AT1G26850.3	54.76	54.59
AT1G26880.1	39.07	38.71
AT1G26880.2	42.02	41.15
AT1G26910.1	26.3	27.14
AT1G26920.1	36.19	35.4
AT1G26930.1	29.87	30.62
AT1G26940.1	22.98	23.67
AT1G26960.1	47.51	44.36
AT1G27000.1	71.05	71.05
AT1G27020.1	28.04	28.95
AT1G27030.1	47.47	46.08
AT1G27050.1	46.44	45.93
AT1G27090.1	32.16	30.88
AT1G27100.1	40.26	40.11
AT1G27130.1	69.23	69.83
AT1G27150.1	40.04	38.74
AT1G27190.1	64.14	64.57
AT1G27210.1	56.78	55.29
AT1G27290.1	53.01	53.82
AT1G27290.2	66.46	67.72
AT1G27300.1	61.79	60.7
AT1G27310.1	65.06	66.67
AT1G27320.1	35.68	35.45
AT1G27330.1	62.24	62.68
AT1G27340.1	51.78	52.81
AT1G27350.1	64.71	64.71
AT1G27380.2	82.23	81.82
AT1G27390.1	33.8	35.91
AT1G27400.1	64.39	65.64
AT1G27430.1	43.82	44.18
AT1G27435.1	55.16	57.21
AT1G27450.1	26.51	27.16
AT1G27450.2	36.36	37.58
AT1G27450.3	31.55	32.08
AT1G27470.1	23.38	24.03
AT1G27510.1	49.79	49.3
AT1G27520.1	30.32	30.36
AT1G27530.1	25	25.89
AT1G27565.1	30.82	31.47
AT1G27600.1	42.5	43.27
AT1G27600.2	34.09	34.54
AT1G27620.1	45.01	46.03
AT1G27630.1	32.68	33.27
AT1G27650.1	17.34	17.04
AT1G27650.2	39.59	38.89
AT1G27670.1	70.3	71.24
AT1G27695.1	60.36	60
AT1G27695.2	55.03	52.9
AT1G27700.1	29.09	29.16
AT1G27730.1	60.21	62.18
AT1G27752.1	33.62	34.12
AT1G27752.2	40.14	40.14
AT1G27760.1	58.79	59.77
AT1G27760.2	34.09	33.43
AT1G27760.3	48.34	47.95
AT1G27770.1	25.37	25.11
AT1G27770.2	30.7	30.61
AT1G27840.1	29.12	29.71
AT1G27840.2	33.27	33.59
AT1G27840.3	28.52	29.17
AT1G27920.1	42.31	41.86
AT1G27921.1	68.87	69.75
AT1G27930.1	51.05	52.71
AT1G27950.1	71.55	70.66
AT1G27970.1	43.48	41.1
AT1G27970.2	59.7	58.25
AT1G27980.1	45.95	45.8
AT1G28050.1	61.57	62.91
AT1G28060.1	50.45	50.52
AT1G28090.3	43.74	42.36
AT1G28100.3	24.01	24.8
AT1G28110.1	34.36	34.97
AT1G28120.1	80.54	81.45
AT1G28130.1	40.47	40.23
AT1G28130.2	55.41	54.12
AT1G28140.1	63.51	64.03
AT1G28150.1	44.23	44.88
AT1G28190.1	57.85	59.12
AT1G28200.1	32.68	33.72
AT1G28240.1	54.3	55.95
AT1G28250.1	39.09	38.46
AT1G28280.1	26.68	26.87
AT1G28280.2	61.51	61.11
AT1G28290.1	41.24	39.64
AT1G28290.2	44.41	42.32
AT1G28320.1	35.01	36.57
AT1G28330.1	52.34	53.48
AT1G28330.2	36.75	38.95
AT1G28330.3	61.72	63.61
AT1G28330.4	32.82	36.13
AT1G28330.5	75.27	79.55
AT1G28340.1	42.21	41.95
AT1G28350.1	40.54	40.59
AT1G28370.1	41.99	41.25
AT1G28380.1	55.4	55.24
AT1G28390.1	51.97	51.6
AT1G28390.2	64.18	64.18
AT1G28395.1	24.34	26.06
AT1G28395.2	13.5	13.64
AT1G28395.3	23.75	23.6
AT1G28395.4	37.02	37.5
AT1G28395.5	60.35	60.35
AT1G28400.1	58.02	60.26
AT1G28410.1	58.74	59.62
AT1G28440.1	43.16	43.36
AT1G28480.1	93.07	94
AT1G28490.1	25	25.73
AT1G28490.2	26.27	27.08
AT1G28510.1	71.94	73.93
AT1G28520.1	35.53	34.98
AT1G28520.2	28.22	28.84
AT1G28540.1	72.28	71.51
AT1G28580.1	47.89	47.29
AT1G28580.2	42.58	42.81
AT1G28620.1	50.47	51.74
AT1G28680.1	47.79	47.7
AT1G28960.1	47.93	47.83
AT1G28960.2	33.26	34.33
AT1G28960.3	65.01	65.01
AT1G28960.4	43.94	44.26
AT1G28960.5	59.82	60.13
AT1G29000.1	71.49	74.18
AT1G29025.1	43.96	42.88
AT1G29030.1	24.43	24.27
AT1G29040.1	39.85	39.77
AT1G29040.2	41.29	42.58
AT1G29040.3	25.37	25.28
AT1G29040.4	49.9	50.71
AT1G29050.1	65.9	66.6
AT1G29060.1	80.31	80.63
AT1G29100.1	31.25	31.75
AT1G29150.1	81.64	81.8
AT1G29160.1	46.06	45.51
AT1G29220.1	38.44	39.03
AT1G29220.2	38.15	37.78
AT1G29250.1	84.06	87.19
AT1G29260.1	57.81	57.58
AT1G29270.1	68.45	70.15
AT1G29280.1	50.16	48.78
AT1G29300.1	41.43	41.09
AT1G29310.1	60.51	60.18
AT1G29320.1	56.76	56.52
AT1G29330.1	25.26	26.63
AT1G29340.1	58.76	59.73
AT1G29350.1	41.5	42.15
AT1G29370.1	45.62	44.74
AT1G29380.1	78.37	76.99
AT1G29400.1	72.42	71.15
AT1G29400.2	65.63	64.33
AT1G29418.1	37.23	42.86
AT1G29470.1	52.18	51.04
AT1G29470.2	44.7	43.59
AT1G29520.1	25.2	25
AT1G29550.1	76.19	79.21
AT1G29560.1	40.1	39.51
AT1G29560.2	51.44	51.2
AT1G29760.1	54.46	53.31
AT1G29790.1	45.84	43.55
AT1G29790.2	59.69	59.34
AT1G29810.1	84.48	85.66
AT1G29820.1	65.76	66.94
AT1G29820.2	37.42	38.26
AT1G29850.1	46.86	49.03
AT1G29850.2	66.54	67.82
AT1G29850.3	60.95	61.62
AT1G29880.1	57.54	57.32
AT1G29890.1	74.92	75.04
AT1G29890.2	74.84	74.13
AT1G29900.1	45.6	45.12
AT1G29910.1	44.74	45
AT1G29920.1	46.42	45.3
AT1G29930.1	39.54	38.98
AT1G29940.1	49.96	50.96
AT1G29950.1	18.8	19.12
AT1G29950.2	55.39	55.03
AT1G29951.1	63.06	63.13
AT1G29952.1	55.39	55.03
AT1G29965.1	44.35	42.68
AT1G29970.1	44.03	45.1
AT1G29970.2	53.42	54.32
AT1G29970.3	54.57	56.06
AT1G29980.1	48.26	47.01
AT1G29980.2	35.43	35.43
AT1G29990.1	54.42	56.16
AT1G30000.1	36.08	36.03
AT1G30070.1	33.33	33.22
AT1G30090.1	54.58	54.68
AT1G30110.1	39.87	38.96
AT1G30110.2	60.22	58.97
AT1G30120.1	23.67	23.58
AT1G30130.1	22.87	23.74
AT1G30130.2	24.18	24.38
AT1G30200.1	45.18	45.1
AT1G30200.2	45.96	45.88
AT1G30230.1	30.23	31.23
AT1G30230.2	30.18	30.91
AT1G30270.1	45.78	46.23
AT1G30320.1	26.04	26.52
AT1G30330.1	50.08	50.2
AT1G30330.2	65.95	66.06
AT1G30360.1	48.95	49.56
AT1G30370.1	62.55	62.55
AT1G30440.1	40.48	41.13
AT1G30450.1	26.79	26.7
AT1G30450.2	48.47	48.47
AT1G30450.3	42.1	42.17
AT1G30460.1	44.86	45.35
AT1G30470.1	55.9	57.34
AT1G30470.2	53.26	55.02
AT1G30470.3	32.39	33.33
AT1G30480.1	59.24	58.89
AT1G30490.1	37.24	36.91
AT1G30510.1	58.93	59.54
AT1G30510.2	60.57	62.11
AT1G30510.3	73.8	74.65
AT1G30580.1	32.66	32.92
AT1G30620.1	40.58	40.65
AT1G30620.2	34.13	34.35
AT1G30620.3	39.9	40.29
AT1G30630.1	56.66	56.36
AT1G30650.1	34.19	33.17
AT1G30690.1	42.59	42.59
AT1G30690.2	23.78	24.09
AT1G30700.1	28.1	28.55
AT1G30720.1	45.79	46.69
AT1G30730.1	49.82	49.73
AT1G30750.1	66.51	67.76
AT1G30755.1	66.19	66.76
AT1G30760.1	48.43	47.73
AT1G30810.2	34.54	33.88
AT1G30820.1	51.78	51.91
AT1G30835.1	34.33	34.33
AT1G30835.2	84.31	83.91
AT1G30840.1	23.08	22.94
AT1G30840.2	66.81	65.87
AT1G30880.1	79.14	79.68
AT1G30900.1	67.59	66.51
AT1G30910.1	54.67	57.02
AT1G30970.1	69.17	69.31
AT1G30970.2	71.17	71.17
AT1G31050.1	35.82	36.13
AT1G31070.1	76.19	73.73
AT1G31070.2	26.92	27.06
AT1G31120.1	38.37	36.43
AT1G31130.1	40.53	41.55
AT1G31150.1	38.44	39.75
AT1G31170.1	67.02	67.72
AT1G31170.2	47.46	47.19
AT1G31170.3	64.71	65.76
AT1G31180.1	55.84	55.58
AT1G31230.1	47.11	46.49
AT1G31280.1	62.08	61.57
AT1G31320.1	28.8	29.17
AT1G31330.1	85.1	83.44
AT1G31335.1	100	100
AT1G31340.1	46.3	44.64
AT1G31350.1	73.07	73.22
AT1G31360.1	48.34	47.33
AT1G31360.2	48.43	48.23
AT1G31420.1	40.75	40.35
AT1G31420.2	39.9	39.42
AT1G31440.1	24.79	24.79
AT1G31600.1	27.09	27.73
AT1G31600.2	41.62	43.71
AT1G31600.3	22.65	24.06
AT1G31660.1	15.07	14.98
AT1G31710.1	56.02	58.36
AT1G31730.1	45.13	44.77
AT1G31770.1	24.42	24.77
AT1G31780.1	34.39	34.06
AT1G31810.1	57.99	58.28
AT1G31812.1	4.52	4.43
AT1G31817.1	37.05	36.48
AT1G31850.1	51.55	51.2
AT1G31850.2	30.77	31.23
AT1G31850.3	64.12	63.21
AT1G31860.1	91.43	91.17
AT1G31870.1	34.85	35.28
AT1G31870.2	34.91	34.23
AT1G31910.1	40.67	41.47
AT1G31910.2	40.94	39.78
AT1G31930.1	37.01	36.53
AT1G31930.2	33.94	33.67
AT1G31930.3	38.68	38.66
AT1G31935.1	26.75	25.45
AT1G31940.1	36.23	35.46
AT1G31950.1	21.69	22.46
AT1G31970.1	59.06	59.89
AT1G32050.1	46.15	46.83
AT1G32070.2	64.78	64.01
AT1G32090.1	43.07	43.02
AT1G32100.1	40.35	39.66
AT1G32130.1	53.54	54.16
AT1G32130.2	34.17	34.11
AT1G32150.1	33.4	33.46
AT1G32170.1	38.15	38.93
AT1G32190.1	66.8	65.11
AT1G32190.2	50.9	49.23
AT1G32210.1	29.33	29.33
AT1G32230.1	59.31	58.89
AT1G32230.2	50.66	49.65
AT1G32230.3	46.47	45.67
AT1G32240.1	36.3	37.11
AT1G32260.1	23.97	24.71
AT1G32340.1	42.84	43.21
AT1G32360.1	63.62	63.84
AT1G32400.1	52.3	52.55
AT1G32400.2	27.98	27.79
AT1G32400.3	48.36	47.34
AT1G32410.1	39.77	40.15
AT1G32410.2	59.26	59.11
AT1G32410.3	41.01	42.38
AT1G32410.4	65.3	65.06
AT1G32410.5	56.39	56.18
AT1G32440.1	59.25	61.07
AT1G32450.1	30.27	31.63
AT1G32460.1	79.19	76.85
AT1G32490.1	52.29	52.16
AT1G32490.2	40.56	40.17
AT1G32500.1	63.62	64.48
AT1G32530.1	53.86	53.16
AT1G32580.1	70.07	71.48
AT1G32630.1	43.22	43.07
AT1G32640.1	47.35	48.3
AT1G32700.1	25.72	26.97
AT1G32700.2	17.52	17.39
AT1G32760.1	66.48	65.93
AT1G32790.1	80.89	80.4
AT1G32790.2	69.85	70.09
AT1G32810.2	29.92	30.04
AT1G32870.1	39.84	38.97
AT1G32870.2	63.89	63.79
AT1G32920.1	53.9	54.25
AT1G32990.1	54.41	53.18
AT1G33040.1	76.03	75.46
AT1G33050.1	46.77	46.82
AT1G33050.2	43.91	44.42
AT1G33050.3	64.92	64.85
AT1G33050.4	31.52	31.49
AT1G33060.1	53.41	52.97
AT1G33060.2	55.23	54.77
AT1G33110.1	42.28	42.35
AT1G33120.1	45.85	49.17
AT1G33140.1	98.44	98.44
AT1G33170.1	34.82	34.63
AT1G33230.1	59.55	59.67
AT1G33240.1	34.87	34.61
AT1G33250.1	48.23	49.37
AT1G33265.1	62.9	61.38
AT1G33290.1	29.83	29.76
AT1G33290.2	31.98	31.34
AT1G33360.1	23.3	23.39
AT1G33390.1	41.7	41.64
AT1G33410.1	26.08	26.04
AT1G33410.2	26.62	26.02
AT1G33470.1	66.61	67.32
AT1G33470.2	67.63	68.62
AT1G33480.1	53.21	50.43
AT1G33490.1	47	46.02
AT1G33520.1	69.3	70.68
AT1G33590.1	43.75	43.14
AT1G33680.1	70.27	70.42
AT1G33700.1	45.92	46.29
AT1G33700.2	46.44	46.53
AT1G33750.1	41.91	41.03
AT1G33780.1	29.56	29.84
AT1G33790.1	29.98	31.73
AT1G33790.2	45.2	45.65
AT1G33800.1	41.48	40.55
AT1G33810.1	25.49	24.07
AT1G33970.1	31.05	30.75
AT1G33970.2	32.59	32.19
AT1G33970.3	49.88	49.09
[truncated: 13,559 more rows]

## Sheet: F6
F6 Root Control vs. Root Salt PPV, 5’ UTR
transcript	sensitivity	PPV
AT1G01010.1	63.64	77.78
AT1G01020.2	52.38	55
AT1G01040.1	92.92	90.52
AT1G01040.2	100	100
AT1G01050.1	83.33	92.59
AT1G01070.1	87.5	82.35
AT1G01090.1	36.36	36.36
AT1G01100.1	58.33	63.64
AT1G01100.2	43.75	35
AT1G01100.3	43.75	38.89
AT1G01100.4	100	100
AT1G01120.1	78.95	85.71
AT1G01160.1	46.38	51.61
AT1G01160.2	65.71	74.19
AT1G01170.1	100	100
AT1G01180.1	100	100
AT1G01210.1	90.48	95
AT1G01230.1	38.64	37.78
AT1G01240.1	100	100
AT1G01240.2	60.61	62.5
AT1G01240.3	62.5	63.22
AT1G01260.1	86.57	87
AT1G01260.2	82.91	83.44
AT1G01260.3	57.07	55.94
AT1G01290.1	NA	NA
AT1G01290.2	NA	NA
AT1G01300.1	100	100
AT1G01340.1	100	100
AT1G01340.2	100	100
AT1G01350.1	42.31	44
AT1G01360.1	12.5	11.76
AT1G01430.1	18.18	20
AT1G01440.1	51.22	48.84
AT1G01470.1	52.38	47.83
AT1G01490.1	74.6	69.12
AT1G01490.2	97.3	100
AT1G01510.1	NA	NA
AT1G01540.1	73.47	70.59
AT1G01540.2	31.58	30
AT1G01550.1	45	47.37
AT1G01550.2	84.62	83.02
AT1G01610.1	100	83.33
AT1G01620.1	72	69.23
AT1G01620.2	70.87	73.74
AT1G01630.1	100	98.28
AT1G01640.1	55.88	51.35
AT1G01640.2	96.97	100
AT1G01650.1	76.19	72.73
AT1G01650.2	38.95	39.36
AT1G01670.1	100	96.97
AT1G01690.1	78.79	89.66
AT1G01730.1	100	100
AT1G01780.1	63.89	62.16
AT1G01800.1	90.91	100
AT1G01800.2	85.71	88.89
AT1G01820.1	86.84	86.84
AT1G01830.1	81.82	91.53
AT1G01830.2	76.39	76.39
AT1G01830.3	74.7	73.37
AT1G01910.1	100	100
AT1G01910.2	100	100
AT1G01910.3	100	100
AT1G01910.4	100	100
AT1G01910.5	36.84	38.89
AT1G01920.1	100	100
AT1G01920.2	94.44	89.47
AT1G01930.1	100	100
AT1G01940.1	100	100
AT1G01950.1	0	0
AT1G01950.2	0	0
AT1G01950.3	0	0
AT1G01990.1	12.82	11.9
AT1G02000.1	31.51	31.51
AT1G02050.1	0	0
AT1G02080.2	35.29	37.5
AT1G02090.1	92.59	100
AT1G02090.2	92.59	100
AT1G02090.3	92.59	100
AT1G02100.1	100	100
AT1G02100.2	92.86	100
AT1G02100.3	50	58.33
AT1G02110.1	100	100
AT1G02130.1	100	100
AT1G02140.1	100	100
AT1G02145.1	100	100
AT1G02145.2	100	100
AT1G02145.3	100	100
AT1G02145.4	100	100
AT1G02150.1	9.52	10
AT1G02160.1	100	100
AT1G02160.2	100	100
AT1G02170.1	44.44	44.44
AT1G02220.1	100	100
AT1G02280.1	89.47	89.47
AT1G02280.2	52.94	52.94
AT1G02305.1	0	0
AT1G02330.1	31.82	31.82
AT1G02335.1	100	100
AT1G02410.1	100	100
AT1G02500.1	68.75	61.11
AT1G02500.2	46.15	46.15
AT1G02520.1	0	0
AT1G02560.1	15.15	15.15
AT1G02610.1	22.5	21.95
AT1G02640.1	100	100
AT1G02680.1	19.44	17.5
AT1G02690.1	6.25	6.25
AT1G02690.2	6.25	6.25
AT1G02730.1	81.25	84.78
AT1G02750.1	81.63	81.63
AT1G02750.2	56.25	69.23
AT1G02780.1	66.67	71.43
AT1G02840.1	50	50
AT1G02840.2	100	100
AT1G02840.3	78.95	83.33
AT1G02860.1	29.17	30.77
AT1G02860.2	29.17	30.77
AT1G02870.1	81.82	85.71
AT1G02880.3	100	100
AT1G02880.4	53.41	51.65
AT1G02890.1	39.39	41.94
AT1G02890.2	39.39	41.94
AT1G02920.1	100	100
AT1G02950.1	100	100
AT1G02950.2	100	100
AT1G02950.3	100	100
AT1G02950.4	10.53	10.26
AT1G02960.1	100	100
AT1G02960.2	100	100
AT1G02960.3	0	0
AT1G02990.1	94.02	94.83
AT1G02990.2	94.02	94.83
AT1G02990.3	57.14	54.55
AT1G03030.1	92.86	84.78
AT1G03040.1	0	0
AT1G03040.2	6.06	6.06
AT1G03080.1	88.89	90.57
AT1G03090.1	100	100
AT1G03090.2	100	100
AT1G03130.1	100	100
AT1G03140.1	100	100
AT1G03150.1	100	100
AT1G03200.1	45.16	41.18
AT1G03220.1	100	100
AT1G03230.1	NA	NA
AT1G03250.1	37.93	34.92
AT1G03250.2	67.74	68.85
AT1G03280.1	54.35	56.82
AT1G03290.1	26.09	18.18
AT1G03290.2	98.94	100
AT1G03330.1	83.12	80
AT1G03350.1	60	65.85
AT1G03360.1	74.29	76.47
AT1G03365.1	48.72	46.34
AT1G03370.1	89.9	88.12
AT1G03380.1	5	4.76
AT1G03430.1	90.8	87.78
AT1G03457.1	66.67	72.73
AT1G03457.2	0	0
AT1G03470.1	72.73	78.05
AT1G03470.2	0	0
AT1G03475.1	100	100
AT1G03530.1	100	100
AT1G03550.1	0	0
AT1G03590.1	62.14	61.54
AT1G03610.1	62.04	63.55
AT1G03740.1	96.3	96.81
AT1G03740.2	96.81	96.81
AT1G03760.1	62.5	38.46
AT1G03770.1	100	98
AT1G03770.2	20	20
AT1G03770.3	100	98
AT1G03780.1	100	100
AT1G03780.2	100	100
AT1G03780.3	96.77	96.77
AT1G03820.1	NA	NA
AT1G03830.2	66.67	65
AT1G03850.1	100	100
AT1G03850.2	100	100
AT1G03860.1	7.41	6.9
AT1G03860.2	86.99	87.7
AT1G03860.3	100	98.59
AT1G03870.1	35.48	40.74
AT1G03900.1	100	100
AT1G03910.1	100	100
AT1G03910.2	100	100
AT1G03950.1	100	100
AT1G03970.1	22.22	21.62
AT1G04030.1	73.08	73.08
AT1G04040.1	100	100
AT1G04070.1	66.67	62.5
AT1G04080.1	30.77	27.59
AT1G04080.2	100	100
AT1G04080.3	100	100
AT1G04120.1	83.96	81.65
AT1G04120.2	58.9	56.95
AT1G04130.1	100	100
AT1G04140.1	98.94	96.88
AT1G04140.2	98.94	96.88
AT1G04170.1	30.51	31.58
AT1G04190.1	0	0
AT1G04200.1	38.24	39.39
AT1G04220.1	0	0
AT1G04230.1	100	100
AT1G04240.1	43.86	44.64
AT1G04250.1	65.71	62.16
AT1G04260.1	28.57	35.29
AT1G04270.1	16	17.39
AT1G04270.2	0	0
AT1G04280.1	12	11.11
AT1G04290.1	43.1	39.68
AT1G04300.1	23.08	20.69
AT1G04300.2	70	71.07
AT1G04300.3	23.08	20.69
AT1G04300.4	9.09	8.89
AT1G04340.1	63.64	63.64
AT1G04360.1	96.77	100
AT1G04400.1	85.14	85.71
AT1G04400.2	100	100
AT1G04410.1	100	100
AT1G04430.1	35.16	37.21
AT1G04430.2	72.31	70.15
AT1G04440.1	56.98	56.59
AT1G04480.1	NA	NA
AT1G04510.1	91.3	91.3
AT1G04510.2	91.3	91.3
AT1G04520.1	50.91	50
AT1G04530.1	100	100
AT1G04550.1	77.78	77.78
AT1G04550.2	77.78	77.78
AT1G04555.1	28	25.93
AT1G04590.1	NA	NA
AT1G04590.2	NA	NA
AT1G04630.1	97.22	97.22
AT1G04635.1	100	100
AT1G04680.1	57.14	66.67
AT1G04690.1	77.42	88.89
AT1G04710.1	100	100
AT1G04750.1	23.81	27.78
AT1G04750.2	63.64	70
AT1G04770.1	0	0
AT1G04778.1	100	100
AT1G04780.1	62.26	62.86
AT1G04790.1	95.65	88
AT1G04810.1	97.3	92.31
AT1G04820.1	100	100
AT1G04830.1	0	0
AT1G04850.1	33.33	36.11
AT1G04860.1	47.83	44
AT1G04870.1	61.43	61.43
AT1G04870.2	68.75	66
AT1G04900.1	100	95.65
AT1G04910.1	100	100
AT1G04950.1	96.61	100
AT1G04950.2	0	0
AT1G04960.1	92.19	88.06
AT1G04960.2	89.31	89.87
AT1G04980.1	100	100
AT1G04985.1	86.21	87.5
AT1G05010.1	46.67	50
AT1G05060.1	NA	NA
AT1G05070.1	38.98	36.51
AT1G05120.1	NA	NA
AT1G05150.1	48.57	47.89
AT1G05180.1	82.35	100
AT1G05180.2	64.1	61.73
AT1G05180.3	64.1	61.73
AT1G05190.1	100	100
AT1G05205.1	100	100
AT1G05240.1	94.12	100
AT1G05250.1	94.12	100
AT1G05260.1	100	100
AT1G05270.1	40	50
AT1G05320.1	70.21	68.75
AT1G05320.2	5.45	6.52
AT1G05320.3	10	10.14
AT1G05340.1	11.27	12.5
AT1G05350.1	72.97	79.41
AT1G05380.1	66.67	67.53
AT1G05380.2	30.95	29.89
AT1G05410.1	58.93	54.1
AT1G05410.2	27.59	27.12
AT1G05430.1	45	42.86
AT1G05460.1	26.32	27.03
AT1G05470.1	60.53	61.06
AT1G05500.1	69.05	64.44
AT1G05570.1	87.93	87.93
AT1G05570.2	87.93	87.93
AT1G05590.1	93.75	93.75
AT1G05620.1	80.49	82.5
AT1G05620.2	100	100
AT1G05710.1	100	100
AT1G05710.2	76.34	74.63
AT1G05710.3	76.34	74.63
AT1G05710.4	100	100
AT1G05710.5	61.22	61.22
AT1G05720.1	100	100
AT1G05780.1	45.83	48.89
AT1G05805.1	100	100
AT1G05830.1	71.93	71.93
AT1G05830.2	71.93	71.93
AT1G05840.1	64.29	62.79
AT1G05850.1	28.85	30
AT1G05860.1	75	75
AT1G05870.1	0	0
AT1G05870.2	0	0
AT1G05870.3	0	0
AT1G05870.4	0	0
AT1G05890.1	79.01	87.67
AT1G05890.2	60	64.49
AT1G05910.1	25	26.09
AT1G05940.1	100	100
AT1G05960.1	100	100
AT1G05960.2	60.38	58.18
AT1G06000.1	25	26.32
AT1G06010.1	26.67	20
AT1G06060.1	93.1	84.38
AT1G06070.1	39.19	37.66
AT1G06110.1	27.78	29.41
AT1G06130.1	100	100
AT1G06130.2	87.5	87.5
AT1G06149.1	55.13	59.72
AT1G06150.2	45.61	46.71
AT1G06180.1	76.67	71.88
AT1G06190.1	100	100
AT1G06190.2	100	100
AT1G06200.1	100	100
AT1G06210.1	0	0
AT1G06210.2	0	0
AT1G06220.1	51.61	53.33
AT1G06220.2	92.86	95.06
AT1G06230.1	65.93	61.81
AT1G06230.2	92.44	89.43
AT1G06230.3	92.06	90.62
AT1G06290.1	0	0
AT1G06390.1	64.71	78.57
AT1G06390.2	0	0
AT1G06400.1	100	76.47
AT1G06410.1	82.14	65.71
AT1G06420.1	86.67	100
AT1G06420.2	86.67	100
AT1G06470.1	93.69	92.04
AT1G06470.2	29.55	28.89
AT1G06475.1	34.38	36.67
AT1G06500.1	100	100
AT1G06500.2	100	100
AT1G06500.3	31.51	29.87
AT1G06500.4	0	0
AT1G06515.1	77.78	76.09
AT1G06515.2	22.41	21.67
AT1G06520.1	100	100
AT1G06530.1	100	100
AT1G06550.1	100	96.49
AT1G06620.1	100	100
AT1G06640.1	0	0
AT1G06640.2	0	0
AT1G06640.3	0	0
AT1G06650.1	70	100
AT1G06650.2	86.36	100
AT1G06670.1	100	100
AT1G06680.1	8.7	7.69
AT1G06700.1	19.23	22.73
AT1G06700.2	33.11	33.33
AT1G06720.1	100	100
AT1G06760.1	10	22.22
AT1G06780.1	57.47	58.82
AT1G06780.2	70.4	71.54
AT1G06790.1	100	100
AT1G06840.1	100	100
AT1G06850.1	54	55.1
AT1G06850.2	93.62	95.65
AT1G06890.1	10.13	10.26
AT1G06890.2	50	51.16
AT1G06890.3	10.13	10.26
AT1G06900.1	56.25	62.07
AT1G06910.1	100	100
AT1G06950.1	64	76.19
AT1G06960.1	90.48	82.61
AT1G06960.2	91.3	84
AT1G06960.3	93.55	87.88
AT1G07000.1	NA	NA
AT1G07020.1	64.52	64.52
AT1G07030.1	31.25	28.74
AT1G07040.1	77.46	76.39
AT1G07070.1	95.83	100
AT1G07080.1	60.87	70
AT1G07090.1	0	0
AT1G07110.1	90.2	95.83
AT1G07135.1	NA	NA
AT1G07140.1	100	100
AT1G07170.1	24.39	27.78
AT1G07170.2	87.04	83.93
AT1G07170.3	75	67.24
AT1G07175.1	NA	NA
AT1G07200.1	44.37	42.57
AT1G07200.2	21.13	20
AT1G07210.1	87.5	100
AT1G07230.1	77.5	64.58
AT1G07240.1	98.15	94.64
AT1G07250.1	28.57	28.57
AT1G07260.1	62.16	69.7
AT1G07300.1	94.23	96.08
AT1G07310.1	100	100
AT1G07320.1	0	0
AT1G07320.2	0	0
AT1G07320.3	0	0
AT1G07320.4	0	0
AT1G07350.2	100	100
AT1G07360.1	78.95	71.43
AT1G07370.1	35.71	31.25
AT1G07420.1	94.44	94.44
AT1G07420.2	46.97	45.59
AT1G07470.1	20	21.74
AT1G07480.1	15.69	18.18
AT1G07480.2	52.63	52.63
AT1G07510.1	79	84.04
AT1G07530.1	98.53	98.53
AT1G07590.1	62.69	61.17
AT1G07610.1	0	NA
AT1G07615.1	31.58	37.5
AT1G07630.1	91.3	100
AT1G07640.1	58.73	56.92
AT1G07640.2	32.56	34.15
AT1G07640.3	61.19	64.06
AT1G07660.1	31.48	31.48
AT1G07660.2	100	100
AT1G07670.1	100	95.24
AT1G07750.1	22.22	28.57
AT1G07770.1	97.44	100
AT1G07770.2	97.44	97.44
AT1G07780.1	47.17	48.08
AT1G07780.2	26.83	30.56
AT1G07780.3	66.9	67.86
AT1G07780.4	66.9	67.86
AT1G07780.5	28.57	29.73
AT1G07790.1	0	0
AT1G07810.1	45.24	44.19
AT1G07820.1	41.82	41.07
AT1G07820.2	56.25	56.25
AT1G07830.1	75	78.57
AT1G07840.1	97.5	100
AT1G07840.2	37.84	38.36
AT1G07840.3	97.5	100
AT1G07870.1	100	100
AT1G07870.2	66.67	68.25
AT1G07880.1	88.24	100
AT1G07880.2	83.33	100
AT1G07890.1	100	91.04
AT1G07890.2	64.29	68.35
AT1G07890.3	100	100
AT1G07890.4	85.29	84.06
AT1G07890.5	95	92.68
AT1G07890.6	100	91.04
AT1G07890.7	30.23	30.23
AT1G07890.8	36.59	35.71
AT1G07920.1	40	43.48
AT1G07930.1	100	96.77
AT1G07930.2	100	96.77
AT1G07940.1	50	42.86
AT1G07940.2	68.06	65.33
AT1G07950.1	100	90
AT1G07960.1	93.75	90.91
AT1G07960.2	94.64	94.08
AT1G07960.3	76.92	74.07
AT1G07980.1	100	100
AT1G07990.1	43.08	46.67
AT1G08000.1	39.29	37.93
AT1G08000.2	23.68	24.66
AT1G08010.1	91.11	91.11
AT1G08010.2	100	100
AT1G08030.1	32.47	32.89
AT1G08040.1	100	98.91
AT1G08040.2	12.5	12.5
AT1G08090.1	0	0
AT1G08110.1	93.1	100
AT1G08110.2	100	100
AT1G08110.3	100	100
AT1G08110.4	100	100
AT1G08125.1	0	0
AT1G08125.2	85.25	88.14
AT1G08125.3	4.76	5
AT1G08130.1	100	100
AT1G08160.1	100	91.67
AT1G08180.1	100	100
AT1G08190.1	100	98.11
AT1G08200.1	22.73	23.81
AT1G08290.1	100	100
AT1G08315.1	85.71	85.71
AT1G08320.1	0	0
AT1G08320.2	10.87	11.63
AT1G08320.3	21.05	23.19
AT1G08340.1	94.87	96.1
AT1G08360.1	29.17	31.82
AT1G08370.1	67.92	62.07
AT1G08380.1	14.29	11.54
AT1G08410.1	15.15	14.71
AT1G08420.1	66.07	67.27
AT1G08420.2	56.62	53.1
AT1G08450.1	100	100
AT1G08450.2	100	100
AT1G08450.3	55	47.83
AT1G08460.1	75	83.33
AT1G08470.1	72.73	72.73
AT1G08480.1	41.94	38.24
AT1G08510.1	87.25	85.58
AT1G08520.1	100	100
AT1G08530.1	100	100
AT1G08540.1	93.55	87.88
AT1G08550.1	100	100
AT1G08550.2	100	100
AT1G08560.1	62.07	66.67
AT1G08570.1	48.15	49.06
AT1G08570.2	32.08	31.48
AT1G08570.3	84.38	87.8
AT1G08570.4	68	66.34
AT1G08580.1	38.46	38.46
AT1G08590.1	78.95	78.95
AT1G08600.1	36.99	37.5
AT1G08600.2	56.16	53.95
AT1G08600.3	36.76	36.23
AT1G08600.4	26.03	24.68
AT1G08620.1	100	100
AT1G08620.2	95	95
AT1G08640.1	30.77	33.33
AT1G08650.1	100	77.78
AT1G08650.2	100	77.78
AT1G08660.1	11.76	11.76
AT1G08660.2	11.76	11.76
AT1G08680.1	70.15	69.12
AT1G08680.2	70.15	69.12
AT1G08680.3	70.15	69.12
AT1G08680.4	70.15	69.12
AT1G08700.1	48.39	51.72
AT1G08710.1	100	100
AT1G08710.2	96.3	100
AT1G08720.1	0	0
AT1G08760.1	86.96	86.96
AT1G08780.1	100	100
AT1G08800.1	13.19	13.64
AT1G08800.2	79.31	78.63
AT1G08820.1	93	92.08
AT1G08820.2	9.43	9.8
AT1G08830.1	86.49	80
AT1G08830.2	0	0
AT1G08880.1	66.67	53.33
AT1G08890.1	NA	NA
AT1G08930.1	51.28	55.56
AT1G08930.2	51.28	55.56
AT1G08970.1	52.94	51.43
AT1G08970.2	52.94	51.43
AT1G08970.3	52.94	51.43
AT1G08970.4	23.89	23.12
AT1G09000.1	26.09	30
AT1G09010.1	100	100
AT1G09020.1	69.15	70.27
AT1G09060.1	0	0
AT1G09060.2	88.46	79.31
AT1G09060.3	100	100
AT1G09070.1	100	100
AT1G09100.1	80	100
AT1G09130.1	46.15	60
AT1G09130.2	46.15	60
AT1G09130.3	94.44	94.44
AT1G09140.1	32.43	33.33
AT1G09140.2	21.62	22.86
AT1G09150.1	71.43	72.58
AT1G09160.1	56.72	55.88
AT1G09160.2	59.72	58.9
AT1G09200.1	57.14	100
AT1G09210.1	13.79	16
AT1G09250.1	56.41	59.46
AT1G09270.1	35.29	30.77
AT1G09270.2	35.29	30.77
AT1G09270.3	46.94	46.46
AT1G09280.1	47.06	44.44
AT1G09290.1	92.31	100
AT1G09300.2	89.86	90.7
AT1G09310.1	100	100
AT1G09320.1	68.75	73.33
AT1G09330.1	100	100
AT1G09415.1	97.96	96
AT1G09430.1	73.81	75.61
AT1G09440.1	96.43	93.1
AT1G09470.1	0	0
AT1G09470.2	41.67	41.67
AT1G09560.1	40	33.33
AT1G09570.1	50.72	51.47
AT1G09570.2	47.68	48
AT1G09575.1	17.86	22.73
AT1G09580.1	75	80
AT1G09590.1	57.14	66.67
AT1G09620.1	0	0
AT1G09630.1	100	100
AT1G09640.1	36.84	41.18
AT1G09640.2	56	53.85
AT1G09645.1	98.39	98.39
AT1G09660.1	62.9	62.9
AT1G09660.2	62.9	62.9
AT1G09690.1	86.67	81.25
AT1G09700.1	46.15	44.78
AT1G09730.1	36.11	37.14
AT1G09730.2	36.11	37.14
AT1G09740.1	17.65	14.29
AT1G09750.1	0	NA
AT1G09760.1	44.44	41.38
AT1G09770.1	97.87	92
AT1G09780.1	87.5	100
AT1G09794.1	100	100
AT1G09815.1	42.11	36.36
AT1G09830.1	87.5	84
AT1G09840.1	31.86	31.58
AT1G09840.2	8.45	8.7
AT1G09840.3	59.57	60.43
AT1G09840.4	60	61.45
AT1G09840.5	63.25	63.79
AT1G09840.6	70.09	70.69
AT1G09850.1	90	100
AT1G09870.1	65.22	78.95
AT1G09910.1	0	0
AT1G09920.1	13.79	13.11
AT1G09932.1	100	100
AT1G09932.2	100	98.18
AT1G09940.1	84.88	83.91
AT1G09970.1	45.45	45.45
AT1G09970.2	0	0
AT1G10020.1	98.55	98.55
AT1G10040.1	21.21	19.7
AT1G10040.2	16.67	16.67
AT1G10070.1	100	100
AT1G10070.2	100	100
AT1G10070.3	82.11	80.8
AT1G10120.1	40.91	43.23
AT1G10130.1	75.86	69.84
AT1G10140.1	NA	0
AT1G10150.1	79.27	86.67
AT1G10180.1	67.86	63.33
AT1G10200.1	38.46	37.04
AT1G10230.1	100	100
AT1G10270.1	NA	NA
AT1G10290.1	66.67	65.52
AT1G10310.1	100	100
AT1G10340.1	30.43	26.92
AT1G10340.2	92.31	100
AT1G10350.1	84.91	88.24
AT1G10380.1	31.82	33.33
AT1G10390.1	70	69.42
AT1G10390.2	65.62	64.95
AT1G10410.1	60	64.08
AT1G10430.1	35.59	41.18
AT1G10450.1	98.1	98.1
AT1G10470.1	73.68	72.41
AT1G10480.1	100	100
AT1G10490.1	91.67	91.67
AT1G10500.1	82.93	85
AT1G10530.1	100	100
AT1G10550.1	50	50
AT1G10580.1	58.82	55.56
AT1G10590.1	56.52	68.42
AT1G10590.2	0	0
AT1G10590.3	100	100
AT1G10610.1	64.84	64.13
AT1G10630.1	34.62	40.91
AT1G10650.1	33.33	29.9
AT1G10650.2	83.71	82.32
AT1G10660.1	95.89	94.59
AT1G10670.1	97.06	97.06
AT1G10670.2	100	98.39
AT1G10670.3	96.97	96.97
AT1G10670.4	100	100
AT1G10700.1	60	52.94
AT1G10720.1	NA	NA
AT1G10740.4	100	100
AT1G10760.1	88	91.67
AT1G10820.1	39.13	35.53
AT1G10820.2	58.93	56.9
AT1G10840.1	74.19	68.66
AT1G10840.2	48.37	48.37
AT1G10850.1	38.89	38.41
AT1G10865.1	95.45	100
AT1G10865.2	100	100
AT1G10870.1	100	100
AT1G10890.1	91.3	91.3
AT1G10900.1	75.81	79.66
AT1G10940.1	36.64	37.8
AT1G10940.2	35.71	35.46
AT1G10950.1	24.24	30.77
AT1G11000.1	100	100
AT1G11020.1	44.74	45.33
AT1G11080.1	47.14	47.14
AT1G11080.2	100	100
AT1G11170.1	42.65	42.03
AT1G11170.2	100	100
AT1G11210.1	85	77.27
AT1G11240.1	56	58.33
AT1G11260.1	85.71	96.77
AT1G11280.1	100	88.89
AT1G11280.2	98.82	100
AT1G11280.3	98.82	100
AT1G11280.4	100	88.89
AT1G11310.1	32.63	32.63
AT1G11310.2	32.63	32.63
AT1G11360.1	87.27	84.21
AT1G11360.2	87.27	84.21
AT1G11360.3	87.27	84.21
AT1G11360.4	87.27	84.21
AT1G11380.1	60	56.25
AT1G11400.1	12.5	12.28
AT1G11400.2	81.16	84.85
AT1G11400.3	76.92	78.95
AT1G11430.1	100	100
AT1G11440.1	100	100
AT1G11450.1	94.29	95.38
AT1G11475.1	88.46	92
AT1G11480.1	45.45	49.02
AT1G11480.2	8.45	8.82
AT1G11530.1	100	100
AT1G11540.1	100	100
AT1G11545.1	100	100
AT1G11580.1	0	NA
AT1G11650.1	100	100
AT1G11650.2	100	100
AT1G11660.1	100	100
AT1G11670.1	37.04	35.71
AT1G11680.1	51.79	55.77
AT1G11750.1	100	100
AT1G11750.2	69.44	73.53
AT1G11760.1	0	0
AT1G11840.1	100	100
AT1G11840.2	100	100
AT1G11840.3	100	100
AT1G11840.4	82.61	86.36
AT1G11840.5	100	100
AT1G11840.6	34.38	34.38
AT1G11860.1	85.71	91.3
AT1G11860.2	83.72	90
AT1G11860.3	97.5	97.5
AT1G11890.1	100	100
AT1G11905.1	100	100
AT1G11910.1	64	59.26
AT1G11930.1	16.67	17.39
AT1G11930.2	16.67	17.39
AT1G11960.1	56.14	56.14
AT1G12000.1	33.33	42.11
AT1G12010.1	0	0
AT1G12020.1	100	100
AT1G12040.1	100	100
AT1G12050.1	100	100
AT1G12080.1	100	100
AT1G12080.2	100	100
AT1G12090.1	12.5	13.79
AT1G12110.1	100	100
AT1G12120.1	60.38	65.98
AT1G12140.1	NA	NA
AT1G12140.2	NA	NA
AT1G12200.1	63.64	63.64
AT1G12230.1	0	NA
AT1G12230.2	91.67	100
AT1G12240.1	100	100
AT1G12270.1	100	100
AT1G12310.1	88.89	100
AT1G12320.1	55.56	55.56
AT1G12360.1	71.88	67.65
AT1G12390.1	18.42	18.67
AT1G12400.1	85.71	90
AT1G12410.1	100	100
AT1G12420.1	7.55	6.15
AT1G12430.1	71.01	76.56
AT1G12430.2	75.38	71.01
AT1G12440.1	86.42	87.5
AT1G12440.2	89.11	90
AT1G12470.1	87.5	91.3
AT1G12500.1	33.33	30.43
AT1G12520.1	100	100
AT1G12520.2	59.65	61.26
AT1G12520.3	44.77	46.11
AT1G12530.1	NA	NA
AT1G12580.1	100	100
AT1G12650.1	100	100
AT1G12650.2	92.86	100
AT1G12650.3	44	42.31
AT1G12650.4	44	42.31
AT1G12680.1	96.67	100
AT1G12750.1	30.93	30.3
AT1G12750.2	69.01	68.6
AT1G12750.3	69.36	68.97
AT1G12760.1	77.78	80.77
AT1G12760.2	10.81	11.76
AT1G12770.1	96.94	96.94
AT1G12780.1	100	100
AT1G12810.1	81.25	76.47
AT1G12810.2	81.25	76.47
AT1G12820.1	42.06	39.82
AT1G12830.1	69.7	76.67
AT1G12840.1	0	0
AT1G12850.1	100	100
AT1G12880.1	86.73	88.54
AT1G12910.1	79.59	81.25
AT1G12920.1	0	0
AT1G12930.1	100	100
AT1G12970.1	35	38.89
AT1G13000.1	84.92	84.25
AT1G13000.2	43.4	44.23
AT1G13020.1	0	0
AT1G13030.1	78.95	85.71
AT1G13060.1	91.3	84
AT1G13060.2	95.56	91.49
AT1G13090.1	100	100
AT1G13110.1	40	33.33
AT1G13120.1	66.89	68.24
AT1G13160.1	100	100
AT1G13170.1	90.36	91.46
AT1G13170.2	90.36	91.46
AT1G13190.1	0	0
AT1G13210.1	36.59	44.12
AT1G13220.1	56.25	50
AT1G13245.1	31.82	30.43
AT1G13250.1	50	55.56
AT1G13260.1	100	100
AT1G13280.1	72.09	75.61
AT1G13300.1	100	100
AT1G13320.1	0	0
AT1G13320.2	0	0
AT1G13320.3	57.14	54.55
AT1G13340.1	100	100
AT1G13350.1	100	100
AT1G13350.2	100	100
AT1G13360.1	40	33.33
AT1G13360.2	64.29	72
AT1G13360.3	64.29	72
AT1G13380.1	80	80
AT1G13390.1	81.48	81.48
AT1G13390.2	63.16	64
AT1G13420.1	NA	NA
AT1G13430.1	100	100
AT1G13440.1	35	36.84
AT1G13440.2	10	11.11
AT1G13450.1	88	88
AT1G13450.2	85.33	85.33
AT1G13450.3	NA	NA
AT1G13460.1	97.06	94.29
AT1G13460.2	59.18	62.37
AT1G13480.1	NA	NA
AT1G13520.1	100	100
AT1G13560.1	0	0
AT1G13560.2	37.93	37.08
AT1G13590.1	NA	NA
AT1G13600.1	0	0
AT1G13620.1	0	0
AT1G13640.1	63.33	61.79
AT1G13670.1	100	100
AT1G13690.1	11.54	11.54
AT1G13730.1	16.44	16
AT1G13740.1	96.51	97.65
AT1G13830.1	100	100
AT1G13870.1	85.71	70.59
AT1G13880.1	59.09	53.06
AT1G13900.1	100	100
AT1G13930.1	50	100
AT1G13930.2	100	100
AT1G13930.3	100	100
AT1G13950.1	54.55	60
AT1G13960.1	100	100
AT1G13960.2	22.22	23.08
AT1G13970.1	94.64	95.5
AT1G13980.1	18.84	17.33
AT1G13980.2	69.79	72.04
AT1G13990.1	0	0
AT1G13990.2	0	0
AT1G14000.1	37.7	43.4
AT1G14010.1	100	100
AT1G14060.1	93.75	83.33
AT1G14120.1	63.89	71.88
AT1G14140.1	100	100
AT1G14160.1	91.07	100
AT1G14170.1	97.44	97.44
AT1G14170.2	100	94.44
AT1G14170.3	100	94.44
AT1G14200.1	100	100
AT1G14210.1	NA	NA
AT1G14230.1	53.85	53.85
AT1G14290.1	100	96.36
AT1G14300.1	100	100
AT1G14300.2	100	100
AT1G14320.1	100	100
AT1G14320.2	100	100
AT1G14330.1	80.25	79.75
AT1G14340.1	84.62	88
AT1G14350.1	0	0
AT1G14350.2	56.44	57.58
AT1G14360.1	94.59	100
AT1G14380.1	46.81	44.9
AT1G14380.2	46.81	44.9
AT1G14380.3	54.29	52.78
AT1G14400.1	56.94	58.57
AT1G14400.2	88	78.57
AT1G14450.1	100	100
AT1G14510.1	14.63	15.38
AT1G14570.1	43.9	41.86
AT1G14570.2	37.74	35.71
AT1G14570.3	43.9	41.86
AT1G14570.4	100	100
AT1G14610.1	0	0
AT1G14620.1	77.42	75
AT1G14620.2	77.42	75
AT1G14630.1	100	25
AT1G14650.1	70	68.29
AT1G14650.2	70	68.29
AT1G14670.1	72.73	72.73
AT1G14685.1	3.77	3.92
AT1G14685.2	74.07	78.95
AT1G14685.3	88.31	88.31
AT1G14690.1	90.59	88.51
AT1G14690.2	98.15	94.64
AT1G14710.1	100	100
AT1G14710.2	89.92	89.17
AT1G14720.1	27.27	22.22
AT1G14730.1	97.67	100
AT1G14740.1	62.5	62.5
AT1G14810.1	100	100
AT1G14830.1	65.52	73.08
AT1G14870.1	100	100
AT1G14890.1	100	100
AT1G14900.1	72.73	100
AT1G14910.1	59.46	62.86
AT1G14980.1	100	100
AT1G15000.1	100	100
AT1G15020.1	100	100
AT1G15020.2	82.05	86.49
AT1G15040.1	78.57	78.57
AT1G15040.2	100	100
AT1G15060.1	0	0
AT1G15100.1	NA	NA
AT1G15110.1	36.71	39.73
AT1G15110.2	36.71	39.73
AT1G15120.1	100	100
AT1G15130.1	100	100
AT1G15200.1	92.73	94.44
AT1G15200.2	92.73	94.44
AT1G15200.3	92.73	94.44
AT1G15200.4	92.73	94.44
AT1G15230.1	100	100
AT1G15250.1	92	88.46
AT1G15270.1	100	100
AT1G15280.1	10	10.34
AT1G15280.2	9.68	10.71
AT1G15290.1	60	66.67
AT1G15310.1	100	100
AT1G15340.1	86.44	87.93
AT1G15340.2	86.44	87.93
AT1G15350.1	77.32	82.42
AT1G15350.2	78.31	84.42
AT1G15350.3	68.5	66.67
AT1G15370.1	0	0
AT1G15380.1	50	56.86
AT1G15380.2	50	68.42
AT1G15390.1	100	100
AT1G15400.1	62.5	62.5
AT1G15400.2	100	100
AT1G15420.1	100	100
AT1G15430.1	72.97	75
AT1G15440.1	100	100
AT1G15470.1	68.75	61.11
AT1G15480.1	100	100
AT1G15500.1	100	100
AT1G15550.1	40	26.67
AT1G15570.1	90	88.52
AT1G15660.1	100	100
AT1G15670.1	25	23.81
AT1G15690.1	100	100
AT1G15690.2	100	100
AT1G15700.1	100	100
AT1G15710.1	88.89	85.71
AT1G15720.1	100	100
AT1G15740.1	30.56	27.5
AT1G15750.1	100	98.21
AT1G15750.2	50	47.96
AT1G15750.3	95.56	96.99
AT1G15750.4	13.73	14.89
AT1G15780.1	100	100
AT1G15810.1	100	100
AT1G15820.1	94.34	89.29
AT1G15860.1	100	100
AT1G15860.2	45	38.3
AT1G15860.3	100	100
AT1G15880.1	23.29	24.29
AT1G15910.1	33.33	32.35
AT1G15920.1	31.36	32.17
AT1G15920.2	58.39	57.97
AT1G15930.1	37.04	35.71
AT1G15930.2	62.07	75
AT1G15940.1	100	100
AT1G15950.1	93.1	100
AT1G15950.2	100	100
AT1G15970.1	79.37	81.97
AT1G16000.1	100	100
AT1G16010.1	74.07	76.92
AT1G16010.2	42.97	39.71
AT1G16010.3	88.57	91.18
AT1G16040.1	100	100
AT1G16060.1	0	0
AT1G16060.2	66	68.28
AT1G16170.1	19.51	23.19
AT1G16180.1	60.87	73.68
AT1G16180.2	61.7	74.36
AT1G16190.1	9.09	10.34
AT1G16210.1	100	100
AT1G16240.1	98.04	100
AT1G16240.2	46.15	45.28
AT1G16240.3	98.04	100
AT1G16270.1	91.84	92.78
AT1G16270.2	89.04	87.25
AT1G16300.1	72.97	72.97
AT1G16340.1	100	100
AT1G16340.2	100	100
AT1G16340.3	100	100
AT1G16340.4	95	96.61
AT1G16400.1	100	100
AT1G16460.1	87.06	89.16
AT1G16460.2	86.54	84.91
AT1G16460.3	32.88	35.29
AT1G16460.4	48.45	48.96
AT1G16470.1	96.88	93.94
AT1G16470.2	59.52	63.29
AT1G16520.1	44.19	42.22
AT1G16530.1	100	100
AT1G16560.1	84.62	68.75
AT1G16560.2	87.5	87.5
AT1G16560.3	88.89	90.91
AT1G16560.4	35.71	37.31
AT1G16610.1	20	19.05
AT1G16610.2	22.22	23.53
AT1G16610.3	100	100
AT1G16630.1	76.32	90.62
AT1G16670.1	86.76	92.19
AT1G16680.1	63.79	63.79
AT1G16700.1	73.77	80.36
AT1G16740.1	0	0
AT1G16810.1	91.67	91.67
AT1G16810.2	100	100
AT1G16840.1	6.25	7.14
AT1G16840.2	5.88	7.14
AT1G16840.3	6.25	7.14
AT1G16840.4	100	100
AT1G16858.1	62.9	61.9
AT1G16860.1	55.38	55.81
AT1G16870.1	100	100
AT1G16880.1	95.08	96.67
AT1G16890.1	97.37	96.1
AT1G16890.2	95.56	91.49
AT1G16890.3	74.36	63.04
AT1G16916.1	100	100
AT1G16920.1	80.77	80.77
AT1G17060.1	100	100
AT1G17070.1	0	0
AT1G17080.1	28.57	27.27
AT1G17110.1	29.85	30.3
AT1G17110.2	60.27	60.27
AT1G17130.1	100	100
AT1G17130.2	100	100
AT1G17140.1	31.65	36.23
AT1G17140.2	69.74	74.65
AT1G17145.1	94.34	92.59
AT1G17160.1	100	100
AT1G17160.2	100	100
AT1G17170.1	100	100
AT1G17190.1	35	41.18
AT1G17210.1	100	100
AT1G17220.1	47.44	48.05
AT1G17280.1	72.73	71.11
AT1G17280.2	27.78	23.81
AT1G17290.1	92.31	90
AT1G17330.1	100	100
AT1G17340.1	71.01	74.24
AT1G17350.1	100	95.45
AT1G17360.1	40.45	39.56
AT1G17370.1	100	96.83
AT1G17370.2	100	96.83
AT1G17380.1	97.62	100
AT1G17430.1	100	100
AT1G17440.1	43.48	50
AT1G17440.2	100	100
AT1G17455.1	71.43	73.86
AT1G17455.2	71.59	71.59
AT1G17470.1	36	37.5
AT1G17470.2	100	100
AT1G17490.1	100	100
AT1G17510.1	57.69	57.69
AT1G17520.1	18.6	19.05
AT1G17530.1	88.89	84.21
AT1G17550.1	82.45	84.24
AT1G17580.1	74.47	77.78
AT1G17620.1	40	36.36
AT1G17680.1	28.42	27.84
AT1G17680.2	35.29	37.5
AT1G17690.1	30	34.09
AT1G17720.1	62.63	62
AT1G17720.2	80	78.05
AT1G17730.1	100	100
AT1G17745.1	100	100
AT1G17745.2	52.94	50
AT1G17760.1	19.82	19.13
AT1G17780.2	59.48	58.47
AT1G17820.1	100	100
AT1G17860.1	100	100
AT1G17880.1	39.13	40.91
AT1G17890.1	61.54	58.54
AT1G17890.2	97.22	100
AT1G17890.3	69.84	72.13
AT1G17930.1	36.67	39.29
AT1G17980.1	42.86	45.83
AT1G17980.2	67.71	72.6
AT1G18030.1	7.14	7.69
AT1G18030.2	7.14	7.69
AT1G18060.1	87.18	87.18
AT1G18070.1	16.13	15.62
AT1G18070.2	16.13	15.62
AT1G18070.3	70.59	75
AT1G18080.1	84	80.77
AT1G18150.1	91.3	87.5
AT1G18150.2	100	100
AT1G18150.3	100	100
AT1G18160.1	62.62	60.36
AT1G18190.1	58.54	55.81
AT1G18210.1	NA	NA
AT1G18210.2	NA	NA
AT1G18250.1	0	0
AT1G18250.2	21.62	21.05
AT1G18260.1	100	100
AT1G18270.1	64	64
AT1G18270.2	64	64
AT1G18270.3	64	64
AT1G18300.1	100	100
AT1G18370.1	50	50
AT1G18450.1	30	26.09
AT1G18470.1	100	97.5
AT1G18470.2	60	54.55
AT1G18480.1	NA	NA
AT1G18490.1	81.77	80.93
AT1G18540.1	100	40
AT1G18570.1	59.6	64.13
AT1G18580.1	64.04	65.52
AT1G18590.1	60	66.67
AT1G18630.1	72	81.82
AT1G18660.1	19.67	19.35
AT1G18660.2	100	100
AT1G18660.3	72.5	67.44
AT1G18660.4	19.67	19.35
AT1G18700.1	100	100
AT1G18700.2	100	100
AT1G18700.4	100	100
AT1G18720.1	100	100
AT1G18740.1	41.86	36
AT1G18800.1	92.11	87.5
AT1G18840.1	50	52.17
AT1G18840.2	91.04	91.73
AT1G18850.1	62.86	59.46
AT1G18880.1	100	100
AT1G18890.1	54.55	53.57
AT1G18950.1	86.67	86.67
AT1G18970.1	NA	NA
AT1G19000.1	78.26	75
AT1G19000.2	78.26	75
AT1G19010.1	100	100
AT1G19010.2	82.98	76.47
AT1G19020.1	100	100
AT1G19050.1	47.06	50
AT1G19080.1	96.3	96.3
AT1G19080.2	95.15	93.33
AT1G19110.1	0	0
AT1G19120.1	4	3.92
AT1G19130.1	100	100
AT1G19180.1	100	100
AT1G19180.2	25.41	25
AT1G19220.1	87.38	88.24
AT1G19240.1	100	100
AT1G19300.1	100	95.45
AT1G19310.1	9.43	10
AT1G19350.1	87.18	79.07
AT1G19350.3	71.43	69.44
AT1G19350.4	58.82	60
AT1G19350.5	91.67	90.16
AT1G19350.6	100	100
AT1G19360.1	45.33	45.95
AT1G19370.1	86.15	91.8
AT1G19396.1	100	100
AT1G19396.3	100	100
AT1G19397.1	80	74.07
AT1G19400.1	93.65	92.71
AT1G19400.2	100	100
AT1G19430.1	23.08	23.08
AT1G19440.1	81.08	78.95
AT1G19485.1	100	100
AT1G19485.2	69.44	69.44
AT1G19520.1	100	100
AT1G19520.2	100	100
AT1G19530.1	69.23	64.29
AT1G19570.1	21.88	21.21
AT1G19570.2	21.88	21.21
AT1G19580.1	70.83	72.34
AT1G19580.2	70.83	72.34
AT1G19600.1	81.25	59.09
AT1G19660.1	100	100
AT1G19660.2	0	0
AT1G19700.1	44	48.94
AT1G19700.2	65.38	64.15
AT1G19700.3	43.1	41.67
AT1G19710.1	57.5	62.16
AT1G19730.1	57.14	61.54
AT1G19740.1	27.78	38.46
AT1G19770.1	70.59	100
AT1G19800.1	100	98.21
AT1G19800.2	100	98.88
AT1G19800.3	65.48	62.5
AT1G19835.1	31.48	30.91
AT1G19835.2	32.56	29.79
AT1G19870.1	85.42	87.23
AT1G19880.1	55.88	55.88
AT1G19910.1	59.09	68.42
AT1G19920.1	100	100
AT1G19950.1	71.93	69.49
AT1G19990.1	100	100
AT1G20010.1	36.36	38.1
AT1G20050.1	67.74	70
AT1G20090.1	64.89	60.4
AT1G20100.1	64.63	66.25
AT1G20100.2	64.63	66.25
AT1G20110.1	22.22	25
AT1G20140.1	100	100
AT1G20160.1	100	100
AT1G20160.2	87.18	91.89
AT1G20190.1	100	100
AT1G20200.1	90.91	83.33
AT1G20220.1	55.71	61.9
AT1G20225.1	NA	NA
AT1G20260.1	51.02	53.19
AT1G20270.1	100	100
AT1G20300.1	7.14	7.69
AT1G20330.1	92.59	100
AT1G20340.1	0	0
AT1G20370.1	100	100
AT1G20410.1	100	100
AT1G20430.1	NA	NA
AT1G20440.1	100	100
AT1G20450.1	95.17	97.18
AT1G20450.2	94.48	97.16
AT1G20460.1	58.54	57.14
AT1G20510.1	100	100
AT1G20510.2	NA	NA
AT1G20560.1	85.19	82.14
AT1G20560.2	95.74	92.78
AT1G20575.1	0	0
AT1G20580.1	81.48	84.62
AT1G20610.1	49.41	53.85
AT1G20620.1	53.85	63.64
AT1G20620.2	53.85	63.64
AT1G20620.4	36.89	33.33
AT1G20620.5	53.85	63.64
AT1G20630.1	80	80
AT1G20670.1	NA	NA
AT1G20693.1	80.56	85.29
AT1G20693.2	80.56	85.29
AT1G20693.3	80.56	85.29
AT1G20696.1	96.77	100
AT1G20696.2	96.43	100
AT1G20696.3	96.43	100
AT1G20760.1	75	75
AT1G20770.1	38.46	41.67
AT1G20840.1	90.91	96.77
AT1G20850.1	100	100
AT1G20900.1	12.59	12.88
AT1G20920.1	31.91	32.61
AT1G20920.2	54.51	53.74
AT1G20930.1	0	0
AT1G20950.1	100	100
AT1G20960.1	0	0
AT1G20960.2	0	0
AT1G20970.1	24.07	23.21
AT1G20980.1	18.25	16.89
AT1G21000.1	34.15	37.84
AT1G21000.2	17.24	19.23
AT1G21050.1	100	100
AT1G21080.1	55.56	53.57
AT1G21080.2	29.79	28
AT1G21080.3	40.68	42.48
AT1G21090.1	76.92	85.11
AT1G21100.1	62.5	57.69
AT1G21110.1	80.65	89.29
AT1G21120.1	36.67	35.48
AT1G21130.1	21.43	19.35
AT1G21130.2	0	0
AT1G21140.1	0	0
AT1G21160.1	50	42.22
AT1G21190.1	0	0
AT1G21200.1	100	100
AT1G21210.1	74.29	72.9
AT1G21310.1	NA	NA
AT1G21370.1	21.3	19.66
AT1G21370.2	90.91	95.24
AT1G21380.1	92.68	92.68
AT1G21390.1	100	98.25
AT1G21440.1	100	100
AT1G21450.1	60.87	65.62
AT1G21560.1	100	100
AT1G21560.2	53.97	53.97
AT1G21560.3	100	100
AT1G21580.1	100	100
AT1G21600.1	100	100
AT1G21600.2	100	100
AT1G21610.1	96.15	90.91
AT1G21610.2	96.15	90.91
AT1G21610.3	100	100
AT1G21630.1	21.21	21.65
AT1G21630.2	60.87	60.34
AT1G21640.1	21.43	23.08
AT1G21640.2	77.78	78.65
AT1G21660.1	60.53	63.01
AT1G21680.1	100	100
AT1G21700.1	84	82.35
AT1G21710.1	64.29	64.29
AT1G21720.1	52.94	50
AT1G21730.1	75.32	74.36
AT1G21750.1	100	100
AT1G21750.2	100	100
AT1G21760.1	73.53	62.5
AT1G21770.1	100	100
AT1G21780.1	52.68	51.75
AT1G21780.2	38.78	38.78
AT1G21790.1	29.09	29.09
AT1G21830.1	61.11	73.33
AT1G21880.1	58.18	58.18
AT1G21880.2	61.82	62.96
AT1G21900.1	87.5	77.78
AT1G21910.1	33.33	35.71
AT1G21920.1	95.29	97.59
AT1G21930.1	100	100
AT1G21980.1	35.58	35.92
AT1G22030.1	52	54.17
AT1G22060.1	65.59	66.3
AT1G22065.1	78.57	100
AT1G22070.1	50	50.6
AT1G22190.1	83.92	86.33
AT1G22200.1	77.05	73.44
AT1G22200.2	77.05	73.44
AT1G22220.1	20.83	19.23
AT1G22230.1	100	100
AT1G22270.1	73.91	85
AT1G22280.1	96.67	92.06
AT1G22280.2	96.67	92.06
AT1G22280.3	35.63	37.8
AT1G22300.1	100	100
AT1G22300.2	100	100
AT1G22300.3	100	100
AT1G22310.1	100	100
AT1G22310.2	87.5	93.33
AT1G22330.1	51.72	55.56
AT1G22360.1	100	100
AT1G22360.2	100	100
AT1G22410.1	61.11	73.33
AT1G22440.1	55	53.66
AT1G22450.1	66.67	66.67
AT1G22470.1	0	0
AT1G22500.1	26.92	28
AT1G22520.1	66.67	60
AT1G22520.2	66.67	60
AT1G22530.1	100	100
AT1G22620.1	95.92	95.92
AT1G22640.1	71.43	68.18
AT1G22700.2	69.57	69.57
AT1G22710.1	52.38	68.75
AT1G22730.1	100	92.65
AT1G22740.1	100	100
AT1G22780.1	30.56	31.43
AT1G22790.1	51.9	50.6
AT1G22790.2	80.26	77.22
AT1G22800.1	65	65
AT1G22840.1	91.67	91.67
AT1G22840.2	91.67	91.67
AT1G22882.1	15.87	16.95
AT1G22885.1	60	60
AT1G22885.2	0	NA
AT1G22910.1	39.66	39.66
AT1G22910.3	39.66	39.66
AT1G22920.1	84.21	80
AT1G22930.1	73.68	75
AT1G22930.2	74.32	74.32
AT1G22950.1	100	100
AT1G22990.1	100	100
AT1G23030.1	100	100
AT1G23040.1	100	100
AT1G23080.1	80.77	77.78
AT1G23080.2	76	73.08
AT1G23080.3	80.77	77.78
AT1G23100.1	91.3	87.5
AT1G23120.1	94.44	85
AT1G23149.1	76.32	70.73
AT1G23150.1	71.82	69.3
AT1G23190.1	68.75	64.71
AT1G23205.1	40	50
AT1G23220.1	91.8	94.92
AT1G23260.1	71.43	62.5
AT1G23280.1	92.31	92.31
AT1G23290.1	100	100
AT1G23310.1	88.89	86.27
AT1G23310.2	88.89	86.27
AT1G23380.1	100	100
AT1G23380.2	100	100
AT1G23390.1	NA	NA
AT1G23410.1	75	100
AT1G23440.1	62.5	80
AT1G23490.1	97.22	97.22
AT1G23530.1	63.64	59.32
AT1G23560.1	100	100
AT1G23710.1	58.62	47.22
AT1G23750.1	100	100
AT1G23780.1	100	92.86
AT1G23800.1	100	100
AT1G23820.1	NA	NA
AT1G23820.2	NA	NA
AT1G23850.1	31.67	32.76
AT1G23860.1	0	0
AT1G23860.2	20	19.05
AT1G23860.3	48.48	45.71
AT1G23860.4	55.7	55
AT1G23870.1	100	100
AT1G23890.2	38.46	33.33
AT1G23900.1	100	100
AT1G23900.2	50	49.25
AT1G23950.1	15.38	20
AT1G23950.2	15.38	20
AT1G23950.3	15.38	20
AT1G23950.4	15.38	20
AT1G23950.5	15.38	20
AT1G23960.1	100	100
AT1G23960.2	98.68	98.68
AT1G23970.1	33.33	40
AT1G23970.2	33.33	40
AT1G24050.1	100	100
AT1G24100.1	46.15	35.29
AT1G24120.1	14.29	12.9
AT1G24160.1	87.5	77.78
AT1G24160.2	54.96	55.38
AT1G24170.1	100	100
AT1G24180.1	0	0
AT1G24190.1	100	100
AT1G24190.2	100	100
AT1G24240.1	12	14.29
AT1G24267.1	100	100
AT1G24267.2	100	100
AT1G24280.1	100	100
AT1G24310.1	23.53	28.57
AT1G24350.1	78.18	76.79
AT1G24350.2	78.18	76.79
AT1G24350.3	56.16	53.95
AT1G24360.1	32.88	32.88
AT1G24450.1	0	0
AT1G24460.2	46.55	45
AT1G24490.1	40	43.48
AT1G24490.2	40	43.48
AT1G24510.1	80.56	90.62
AT1G24510.2	47.85	50.28
AT1G24560.1	76.25	74.39
AT1G24575.1	100	100
AT1G24600.1	100	100
AT1G24625.1	41.07	41.82
AT1G24706.1	67.39	60.78
AT1G24706.2	67.39	60.78
AT1G24764.1	96.15	100
AT1G24793.1	100	100
AT1G24793.2	0	0
AT1G24800.1	100	100
AT1G24880.1	56.25	75
AT1G24880.2	56.25	75
AT1G24880.3	56.25	75
AT1G24881.1	34.78	34.78
AT1G25054.1	27.27	30
AT1G25054.2	68.57	75
AT1G25055.1	100	100
AT1G25150.1	100	50
AT1G25211.1	100	50
AT1G25220.1	100	100
AT1G25220.2	18.75	15
AT1G25230.1	100	100
AT1G25260.1	100	100
AT1G25275.1	0	NA
AT1G25275.2	0	NA
AT1G25275.3	0	NA
AT1G25280.1	42.27	41.62
AT1G25280.2	71.75	72.96
AT1G25280.3	33.16	33.16
AT1G25350.1	100	100
AT1G25350.2	100	100
AT1G25370.1	15.79	13.33
AT1G25380.1	6.94	6.94
AT1G25400.1	50	41.18
AT1G25400.2	100	100
AT1G25420.1	100	100
AT1G25420.2	33.77	33.12
AT1G25420.3	95.05	93.2
AT1G25422.1	8.77	7.58
AT1G25490.1	92.11	94.59
AT1G25510.1	0	0
AT1G25520.1	37.93	37.93
AT1G25530.1	62.5	62.5
AT1G25540.1	100	100
AT1G25540.2	30.64	32.52
AT1G25550.1	35.19	41.3
AT1G25560.1	66.67	71.43
AT1G25570.1	100	100
AT1G25580.1	29.23	27.94
AT1G25682.1	33.33	35.71
AT1G26110.1	30	27.27
AT1G26110.2	30	27.27
AT1G26150.1	43.57	46.56
AT1G26250.1	100	100
AT1G26260.1	87.88	87.88
AT1G26260.2	85.71	78.95
AT1G26270.1	50	50
AT1G26340.1	100	100
AT1G26440.1	51.85	48.28
AT1G26440.2	32.65	31.68
AT1G26440.3	51.85	48.28
AT1G26440.4	51.85	48.28
AT1G26450.1	50.91	50.91
AT1G26460.1	100	100
AT1G26470.1	100	100
AT1G26520.1	75	75
AT1G26550.1	44.44	44.44
AT1G26580.1	55.38	53.52
AT1G26620.1	50	49.61
AT1G26630.1	84.21	100
AT1G26630.2	84.21	100
AT1G26640.1	0	0
AT1G26660.1	0	0
AT1G26660.2	76.67	74.19
AT1G26665.1	95.83	100
AT1G26665.2	95.83	100
AT1G26670.1	3.39	3.77
AT1G26690.1	66.67	63.16
AT1G26740.1	50	58.33
AT1G26750.1	100	100
AT1G26800.1	100	100
AT1G26830.1	57.5	69.7
AT1G26850.1	35.21	43.86
AT1G26850.2	46.39	48.91
AT1G26850.3	35.21	43.86
AT1G26880.1	100	100
AT1G26880.2	100	100
AT1G26910.1	100	100
AT1G26920.1	0	0
AT1G26930.1	87.18	82.93
AT1G26940.1	100	100
AT1G26960.1	100	100
AT1G27000.1	32.43	31.58
AT1G27020.1	92.31	70.59
AT1G27030.1	100	100
AT1G27050.1	100	100
AT1G27090.1	35.48	36.67
AT1G27100.1	72.22	68.42
AT1G27130.1	22.73	25
AT1G27150.1	97.62	97.62
AT1G27190.1	69.57	69.57
AT1G27210.1	38.46	45.45
AT1G27290.1	94.87	94.87
AT1G27290.2	94.87	94.87
AT1G27300.1	100	95.35
AT1G27310.1	96.67	96.67
AT1G27330.1	90.48	100
AT1G27340.1	14.49	14.93
AT1G27350.1	100	90.91
AT1G27380.2	21.43	24.32
AT1G27390.1	63.64	70
AT1G27400.1	100	100
AT1G27435.1	33.33	29.41
AT1G27450.1	76.71	78.87
AT1G27450.2	0	0
AT1G27450.3	76.71	78.87
AT1G27470.1	63.64	70
AT1G27510.1	0	0
AT1G27520.1	100	100
AT1G27530.1	100	100
AT1G27565.1	46.43	46.43
AT1G27600.1	21.43	21.13
AT1G27600.2	0	0
AT1G27620.1	0	NA
AT1G27630.1	57.81	59.68
AT1G27650.1	35.71	34.09
AT1G27650.2	100	94.44
AT1G27670.1	80	69.57
AT1G27695.1	82.61	82.61
AT1G27695.2	100	100
AT1G27700.1	100	100
AT1G27730.1	16.67	25
AT1G27752.1	20.93	21.95
AT1G27752.2	73.96	72.86
AT1G27760.1	9.52	8.57
AT1G27760.2	41.43	41.43
AT1G27760.3	9.52	8.57
AT1G27770.1	8.7	9.09
AT1G27770.2	8.7	9.09
AT1G27840.1	15.22	15.91
AT1G27840.2	100	100
AT1G27840.3	100	100
AT1G27920.1	100	97.56
AT1G27930.1	97.56	90.91
AT1G27950.1	100	100
AT1G27970.1	31.25	33.33
AT1G27970.2	31.25	33.33
AT1G27980.1	73.33	78.57
AT1G28050.1	28.57	25.53
AT1G28060.1	100	100
AT1G28090.3	100	100
AT1G28100.3	46.67	48.28
AT1G28110.1	60	64.29
AT1G28120.1	100	100
AT1G28130.1	54.05	62.5
AT1G28130.2	100	100
AT1G28140.1	100	100
AT1G28150.1	0	0
AT1G28190.1	100	100
AT1G28200.1	100	100
AT1G28240.1	80	82.86
AT1G28250.1	100	100
AT1G28280.1	0	0
AT1G28280.2	0	0
AT1G28290.1	32.26	29.41
AT1G28290.2	NA	NA
AT1G28320.1	61.76	60
AT1G28330.1	70	100
AT1G28330.2	62.5	100
AT1G28330.3	100	100
AT1G28330.4	0	0
AT1G28330.5	0	0
AT1G28350.1	100	100
AT1G28370.1	28.57	19.05
AT1G28380.1	85.71	80
AT1G28390.1	100	100
AT1G28390.2	100	100
AT1G28395.1	25	40
AT1G28395.2	0	NA
AT1G28395.3	25	40
AT1G28395.4	25	40
AT1G28395.5	100	100
AT1G28400.1	100	100
AT1G28410.1	100	100
AT1G28420.1	100	100
AT1G28440.1	100	100
AT1G28480.1	100	100
AT1G28490.1	62.5	65.79
AT1G28490.2	7.27	6.78
AT1G28510.1	100	100
AT1G28520.1	87.18	85
AT1G28520.2	87.18	85
AT1G28540.1	0	0
AT1G28580.1	100	100
AT1G28580.2	41.48	41.48
AT1G28680.1	100	100
AT1G28960.1	100	87.5
AT1G28960.2	100	87.5
AT1G28960.3	100	87.5
AT1G28960.4	100	87.5
AT1G28960.5	100	87.5
AT1G29025.1	83.64	83.64
AT1G29030.1	100	95.24
AT1G29040.1	100	100
AT1G29040.2	100	100
AT1G29040.3	100	100
AT1G29040.4	100	100
AT1G29050.1	64.86	72.73
AT1G29060.1	100	100
AT1G29150.1	100	100
AT1G29220.1	100	100
AT1G29220.2	100	100
AT1G29250.1	79.07	80.95
AT1G29260.1	39.39	40.62
AT1G29270.1	100	100
AT1G29280.1	75	72.97
AT1G29300.1	65.22	78.95
AT1G29310.1	17.86	22.73
AT1G29320.1	0	0
AT1G29330.1	79.66	79.66
AT1G29340.1	0	0
AT1G29350.1	94.64	94.64
AT1G29370.1	100	100
AT1G29380.1	85.71	70.59
AT1G29400.1	20.51	20.51
AT1G29400.2	100	98.67
AT1G29470.1	28.87	27.72
AT1G29470.2	100	100
AT1G29520.1	65	65
AT1G29560.1	25	22.97
AT1G29560.2	41.05	42.73
AT1G29760.1	100	100
AT1G29790.1	90.91	100
AT1G29810.1	100	100
AT1G29820.1	0	0
AT1G29820.2	56.1	52.27
AT1G29850.1	71.88	69.7
AT1G29850.2	71.88	69.7
AT1G29850.3	71.88	69.7
AT1G29880.1	100	100
AT1G29890.1	88.44	90.28
AT1G29890.2	100	100
AT1G29900.1	92.59	92.59
AT1G29910.1	100	100
AT1G29920.1	93.75	100
AT1G29930.1	0	0
AT1G29940.1	100	100
AT1G29950.1	47.71	47.56
AT1G29950.2	59.94	59.78
AT1G29951.1	59.47	60.43
AT1G29952.1	36.3	38.13
AT1G29965.1	39.13	39.13
AT1G29970.1	0	0
AT1G29970.2	100	100
AT1G29970.3	0	0
AT1G29980.1	89.66	89.66
AT1G29980.2	95.08	93.55
AT1G29990.1	88.89	88.89
AT1G30000.1	82.22	82.22
AT1G30070.1	100	100
AT1G30090.1	54.41	52.11
AT1G30110.1	64.1	62.5
AT1G30110.2	82.69	87.76
AT1G30120.1	85.71	90
AT1G30130.1	94.74	94.74
AT1G30130.2	94.74	94.74
AT1G30200.1	100	100
AT1G30200.2	100	100
AT1G30230.1	68.18	65.22
AT1G30230.2	68.18	65.22
AT1G30270.1	38.94	36.67
AT1G30320.1	64.29	58.06
AT1G30330.1	47.57	47.57
AT1G30330.2	61.41	61.67
AT1G30360.1	50.88	46.77
AT1G30400.1	77.42	70.59
AT1G30400.2	100	100
AT1G30450.1	100	98.08
AT1G30450.2	100	98.08
AT1G30450.3	100	98.08
AT1G30460.1	33.33	30.43
AT1G30470.1	100	100
AT1G30470.2	98.44	96.92
AT1G30470.3	98.44	96.92
AT1G30480.1	100	100
AT1G30490.1	60.38	54.24
AT1G30510.1	100	100
AT1G30510.2	100	100
AT1G30510.3	51.25	54.67
AT1G30580.1	100	100
AT1G30620.1	63.39	62.83
AT1G30620.2	96.8	95.28
AT1G30620.3	63.39	62.83
AT1G30630.1	68	62.96
AT1G30650.1	78.89	76.34
AT1G30690.1	77.78	75
AT1G30690.2	52.17	52.94
AT1G30700.1	100	100
AT1G30720.1	NA	NA
AT1G30750.1	100	100
AT1G30755.1	100	100
AT1G30760.1	NA	NA
AT1G30810.2	63.03	68.18
AT1G30820.1	52.08	53.19
AT1G30840.1	87.5	100
AT1G30840.2	78.12	86.21
AT1G30880.1	61.54	66.67
AT1G30910.1	100	100
AT1G30970.1	95.65	95.65
AT1G30970.2	82.95	83.91
AT1G31050.1	14.29	13.64
AT1G31070.1	0	0
AT1G31070.2	0	0
AT1G31120.1	53.97	50.37
AT1G31130.1	10.34	8.82
AT1G31170.1	0	0
AT1G31170.2	0	0
AT1G31170.3	0	0
AT1G31180.1	NA	NA
AT1G31230.1	86.84	89.19
AT1G31280.1	47.37	50
AT1G31320.1	0	0
AT1G31330.1	40	35.29
AT1G31335.1	46.15	54.55
AT1G31340.1	100	100
AT1G31350.1	100	88.89
AT1G31360.1	65.38	60.71
AT1G31360.2	100	100
AT1G31420.1	45	44.44
AT1G31420.2	24.18	23.91
AT1G31440.1	58.21	65
AT1G31600.1	28.47	25.79
AT1G31600.2	16.33	15.09
AT1G31600.3	28.57	28.37
AT1G31660.1	53.85	58.33
AT1G31710.1	100	100
AT1G31730.1	47.06	42.11
AT1G31770.1	51.22	52.5
AT1G31780.1	100	100
AT1G31810.1	98.18	100
AT1G31812.1	0	0
AT1G31817.1	0	0
AT1G31850.1	44.62	42.03
AT1G31850.2	80	77.42
AT1G31850.3	94.29	94.29
AT1G31860.1	100	100
AT1G31870.1	54.55	55.81
AT1G31870.2	40	40
AT1G31910.1	87.62	87.2
AT1G31910.2	87.62	87.2
AT1G31930.1	89.8	91.67
AT1G31930.2	23.75	21.11
AT1G31930.3	93.26	90.22
AT1G31940.1	85.19	81.36
AT1G31970.1	100	100
AT1G32050.1	69.23	66.67
AT1G32070.2	0	0
AT1G32090.1	57.14	50
AT1G32100.1	60	50
AT1G32130.1	90.48	95
AT1G32130.2	96.55	93.33
AT1G32150.1	80.95	80.95
AT1G32170.1	100	100
AT1G32190.1	100	100
AT1G32190.2	83.51	85.26
AT1G32210.1	52.78	51.35
AT1G32230.1	66.67	67.97
AT1G32230.2	66.67	67.97
AT1G32230.3	79.49	79.49
AT1G32240.1	53.12	51.52
AT1G32260.1	100	100
AT1G32340.1	0	0
AT1G32360.1	23.28	22.5
AT1G32400.1	100	100
AT1G32400.2	78.15	79.49
AT1G32400.3	48.39	46.88
AT1G32410.1	100	100
AT1G32410.2	100	92.68
AT1G32410.3	100	95.56
AT1G32410.4	100	100
AT1G32410.5	63.89	65.71
AT1G32440.1	100	100
AT1G32450.1	75.68	77.78
AT1G32460.1	39.29	43.14
AT1G32490.1	47.27	50
AT1G32490.2	51.67	54.39
AT1G32500.1	88.24	88.24
AT1G32530.1	72.22	76.47
AT1G32580.1	0	0
AT1G32630.1	63.93	66.1
AT1G32640.1	100	100
AT1G32700.1	15.38	17.14
AT1G32700.2	61.18	60.39
AT1G32750.1	62.82	65.33
AT1G32760.1	0	0
AT1G32790.1	45.24	46.34
AT1G32790.2	45.24	46.34
AT1G32870.1	0	0
AT1G32870.2	0	0
AT1G32920.1	0	0
AT1G32990.1	100	100
AT1G33040.1	77.27	80.95
AT1G33050.1	95	95
AT1G33050.2	95	95
AT1G33050.3	95	95
AT1G33050.4	95	95
AT1G33060.1	100	100
AT1G33060.2	100	100
AT1G33110.1	51.35	52.78
AT1G33120.1	100	100
AT1G33140.1	100	100
AT1G33170.1	100	100
AT1G33230.1	60.71	59.65
AT1G33240.1	80.6	79.41
AT1G33250.1	91.43	88.89
AT1G33265.1	0	0
AT1G33290.1	100	100
AT1G33290.2	NA	NA
AT1G33360.1	100	100
AT1G33390.1	100	84.85
AT1G33410.1	100	100
AT1G33410.2	100	100
AT1G33470.1	25	26.32
AT1G33470.2	11.76	12.5
AT1G33480.1	20	20
AT1G33490.1	92.11	94.59
AT1G33520.1	100	100
AT1G33590.1	NA	NA
AT1G33680.1	77.78	80.77
AT1G33700.1	100	88.46
AT1G33700.2	100	100
AT1G33780.1	83.33	83.33
AT1G33790.1	0	0
AT1G33790.2	0	0
AT1G33800.1	100	100
AT1G33810.1	100	100
AT1G33970.1	100	100
AT1G33970.2	100	100
AT1G33970.3	100	100
AT1G33970.4	100	100
AT1G33970.5	100	100
AT1G33980.1	92.11	87.5
AT1G33980.2	92.11	87.5
AT1G33990.1	54.84	54.26
AT1G34010.1	100	100
AT1G34020.1	67.61	72.73
AT1G34030.1	60	66.67
AT1G34130.1	67.86	70.37
AT1G34150.1	100	100
AT1G34190.1	0	0
AT1G34220.1	100	100
AT1G34220.2	18.75	17.31
AT1G34300.1	0	0
AT1G34320.1	52.94	53.33
AT1G34360.1	57.58	61.29
AT1G34370.1	17.14	20.69
AT1G34370.2	32.5	37.14
AT1G34370.3	20.36	22.52
AT1G34430.1	42.11	36.36
AT1G34750.1	38.14	37.82
AT1G34760.1	100	100
AT1G34760.2	100	100
AT1G35160.1	23.53	36.36
AT1G35160.2	0	0
AT1G35190.1	100	100
AT1G35190.2	100	100
AT1G35260.1	35.29	37.5
AT1G35430.1	40	40
AT1G35460.1	75.47	72.73
AT1G35470.1	62.5	68.18
AT1G35470.2	81.25	86.67
AT1G35580.1	40.74	55
AT1G35580.2	19.35	22.22
AT1G35580.3	19.35	22.22
AT1G35620.1	100	100
AT1G35670.1	66.67	70.59
AT1G35680.1	100	100
AT1G35720.1	62.5	53.57
AT1G35780.1	70.45	70.45
AT1G36050.1	51.81	52.44
AT1G36050.2	32.53	32.93
AT1G36060.1	80.17	81.58
AT1G36160.1	75	66.67
AT1G36160.2	100	100
AT1G36280.1	100	100
AT1G36280.2	100	100
AT1G36310.1	64	64
AT1G36310.2	100	100
AT1G36320.1	100	100
AT1G36370.1	100	100
AT1G36380.1	100	100
AT1G36640.1	100	100
AT1G36730.1	31.01	29.85
AT1G36732.1	60	51.56
AT1G36980.1	20	23.08
AT1G37130.1	78.95	75
AT1G38131.1	63.04	63.04
AT1G41830.1	0	0
AT1G41880.1	100	96.55
AT1G42430.1	75.68	71.79
AT1G42430.2	75.68	71.79
AT1G42440.1	100	100
AT1G42480.1	100	100
AT1G42480.2	67.86	73.08
AT1G42480.3	100	100
AT1G42960.1	100	100
AT1G43020.2	0	0
AT1G43130.1	0	0
AT1G43170.1	100	100
AT1G43170.2	100	100
AT1G43170.3	100	100
AT1G43170.4	77.42	68.57
AT1G43170.5	23.81	23.26
AT1G43170.6	0	0
AT1G43170.7	32.65	34.78
AT1G43170.8	97.96	100
AT1G43170.9	7.14	6.12
AT1G43190.1	35.48	34.38
AT1G43190.2	100	100
AT1G43190.3	73.33	73.33
AT1G43580.1	100	100
AT1G43650.1	NA	0
AT1G43650.2	50	63.64
AT1G43670.1	0	0
AT1G43690.1	95.24	95.24
AT1G43700.1	20	20.69
AT1G43710.1	76.47	100
AT1G43790.1	100	77.78
AT1G43850.1	93.37	93.85
AT1G43850.2	100	100
AT1G43860.1	9.09	9.52
AT1G43890.1	16.13	16.67
AT1G43890.2	16.13	16.67
AT1G43890.3	87.88	85.29
AT1G43900.1	NA	NA
AT1G43910.1	100	100
AT1G44050.1	100	100
AT1G44160.1	98.11	89.66
[truncated: 12,678 more rows]

## Sheet: F7
F7 Root Control vs. Root Salt PPV, CDS
transcript	sensitivity	PPV
AT1G01010.1	47.97	47.86
AT1G01020.2	38.22	39.89
AT1G01050.1	47.03	47.74
AT1G01070.1	32.26	33.06
AT1G01090.1	32.94	34.76
AT1G01100.1	88.7	91.07
AT1G01100.2	88.7	91.07
AT1G01100.3	81.05	85.56
AT1G01100.4	88.7	91.07
AT1G01120.1	40.7	41.77
AT1G01160.1	66.26	63.91
AT1G01160.2	79.15	79.15
AT1G01170.1	16.05	17.33
AT1G01180.1	56.69	58.17
AT1G01210.1	42.42	42
AT1G01230.1	17.45	16.77
AT1G01240.1	76.53	76.28
AT1G01240.2	76.53	76.28
AT1G01240.3	48.55	49.67
AT1G01260.1	43.94	43.48
AT1G01260.2	46.4	46.07
AT1G01260.3	43.94	43.48
AT1G01290.1	55.64	55.21
AT1G01290.2	28.79	28.57
AT1G01300.1	24.64	24.07
AT1G01340.1	50.22	50
AT1G01340.2	46.06	46.2
AT1G01350.1	53.8	54.66
AT1G01360.1	2.86	2.84
AT1G01430.1	59.28	59.85
AT1G01440.1	47.44	47.52
AT1G01470.1	53.52	55.07
AT1G01490.1	72.18	71.64
AT1G01490.2	72.18	71.64
AT1G01510.1	39.36	40
AT1G01540.1	19.33	19.08
AT1G01540.2	27.83	27.65
AT1G01550.1	51.19	52.44
AT1G01550.2	51.19	52.44
AT1G01610.1	21.33	22.25
AT1G01620.1	73.63	75.56
AT1G01620.2	78.5	80.1
AT1G01630.1	35.5	35.81
AT1G01640.1	32.42	32.42
AT1G01640.2	40.11	39.25
AT1G01650.1	39.54	39.25
AT1G01650.2	23.99	24.05
AT1G01660.1	37.74	36.47
AT1G01670.1	39.1	38.87
AT1G01690.1	58.25	58.81
AT1G01730.1	30.43	31.03
AT1G01780.1	22.22	21.74
AT1G01800.1	73.42	73.91
AT1G01800.2	85.71	86.05
AT1G01820.1	37.22	37.05
AT1G01830.1	51.82	51.72
AT1G01830.2	51.82	51.72
AT1G01830.3	53.54	53.54
AT1G01910.1	29.03	28.61
AT1G01910.2	29.82	29.65
AT1G01910.3	32.11	31.27
AT1G01910.4	31.56	30.92
AT1G01910.5	50.43	49.37
AT1G01920.1	44.39	45.09
AT1G01920.2	26.55	27.34
AT1G01930.1	71.58	72.97
AT1G01940.1	66.91	64.34
AT1G01950.1	20.79	20.55
AT1G01950.2	27.6	27.63
AT1G01950.3	44.48	43.74
AT1G01990.1	77.27	79.07
AT1G02000.1	76.26	76.87
AT1G02050.1	50.4	50.53
AT1G02090.1	34.14	34.98
AT1G02090.2	53.95	54.98
AT1G02090.3	48.88	50.7
AT1G02100.1	37.23	36.34
AT1G02100.2	30.3	30.61
AT1G02100.3	29.57	29.13
AT1G02110.1	41.07	41.19
AT1G02120.1	48.14	48.47
AT1G02130.1	71.94	74.21
AT1G02140.1	49.62	50.38
AT1G02145.1	50.21	50.84
AT1G02145.2	39.23	37.54
AT1G02145.3	40.87	41.74
AT1G02145.4	45.94	46.15
AT1G02150.1	25.29	25.29
AT1G02160.1	50	50.79
AT1G02160.2	42.05	41.11
AT1G02170.1	37.35	38.14
AT1G02220.1	72.9	72.7
AT1G02280.1	35.74	36.49
AT1G02280.2	39.52	41.67
AT1G02305.1	73.28	74.3
AT1G02330.1	39.48	37.7
AT1G02335.1	34.95	36.36
AT1G02410.1	32.01	32.6
AT1G02500.1	21.73	23.51
AT1G02500.2	30.05	32.01
AT1G02520.1	32.16	32.72
AT1G02560.1	31.34	31.34
AT1G02610.1	34.98	35.32
AT1G02640.1	47.11	47.48
AT1G02680.1	48.21	51.43
AT1G02690.1	31.89	32.08
AT1G02690.2	31.89	32.08
AT1G02730.1	29.02	28.93
AT1G02750.1	31.58	32.88
AT1G02750.2	41.71	43.23
AT1G02780.1	59.8	63.21
AT1G02840.1	43.88	45.1
AT1G02840.2	57.19	58.89
AT1G02840.3	43.43	45.1
AT1G02860.1	74.32	75.46
AT1G02860.2	73.25	74.38
AT1G02870.1	60.12	57.14
AT1G02880.3	56.57	56.8
AT1G02880.4	23.84	25.62
AT1G02890.1	44.78	45.56
AT1G02890.2	44.21	44.89
AT1G02900.1	37.84	37.84
AT1G02920.1	31.34	30.88
AT1G02950.1	30.51	29.88
AT1G02950.2	57.69	55.33
AT1G02950.3	30.9	29.88
AT1G02950.4	33.66	33.17
AT1G02960.1	48.15	47.93
AT1G02960.2	35.33	36.14
AT1G02960.3	40.81	41.33
AT1G02990.1	43.29	43.33
AT1G02990.2	34.94	34.76
AT1G02990.3	28.03	27.35
AT1G03030.1	31.16	31.16
AT1G03040.1	55.16	55.96
AT1G03040.2	32.99	33.69
AT1G03090.1	36.9	37.59
AT1G03090.2	36.27	37.25
AT1G03130.1	8.62	8.38
AT1G03140.1	59.75	59.75
AT1G03150.1	34.39	35.53
AT1G03200.1	12.2	13.16
AT1G03210.1	71.9	70.36
AT1G03220.1	49.74	50.13
AT1G03230.1	41.62	41.41
AT1G03250.1	46.19	45.8
AT1G03250.2	40.25	40.93
AT1G03280.1	49.89	48.25
AT1G03290.1	54.33	55.33
AT1G03290.2	56.7	57.64
AT1G03330.1	46.59	45.56
AT1G03350.1	40.37	40.27
AT1G03360.1	77.06	80.51
AT1G03365.1	44.44	43.51
AT1G03370.1	42.61	41.81
AT1G03380.1	44.7	44.75
AT1G03430.1	75.78	78.21
AT1G03457.1	54.52	54.94
AT1G03457.2	55.77	55.77
AT1G03470.1	42.17	41.02
AT1G03470.2	41.37	40.23
AT1G03475.1	43.77	43.08
AT1G03530.1	46.71	46.77
AT1G03550.1	5.45	5.38
AT1G03560.1	26.7	27.96
AT1G03590.1	26.33	26.86
AT1G03610.1	71.2	72.94
AT1G03740.1	35.24	35.38
AT1G03740.2	25.26	25.69
AT1G03750.1	48.38	48.62
AT1G03760.1	66.39	67.9
AT1G03770.1	22.69	23.56
AT1G03770.2	62.27	61.84
AT1G03770.3	55.61	55.73
AT1G03780.1	34.05	33.23
AT1G03780.2	33.63	33.93
AT1G03780.3	36.17	36.48
AT1G03820.1	48.7	47.47
AT1G03830.1	69.74	70.33
AT1G03830.2	68.25	69.04
AT1G03850.1	39.33	38.31
AT1G03850.2	21.83	22.63
AT1G03860.1	47.47	46.21
AT1G03860.2	49.21	46.04
AT1G03860.3	47.47	46.21
AT1G03870.1	32.59	33.49
AT1G03900.1	48.47	49.22
AT1G03910.1	43.83	44.63
AT1G03910.2	36.46	37.93
AT1G03950.1	43.55	43.55
AT1G03970.1	55.47	55.24
AT1G04030.1	75.88	74.38
AT1G04040.1	11.37	11.46
AT1G04070.1	92.47	91.49
AT1G04080.1	82.59	84.31
AT1G04080.2	39.64	39.86
AT1G04080.3	34.17	33.96
AT1G04120.1	60.86	61.35
AT1G04120.2	54.7	54.99
AT1G04130.1	62.35	62.16
AT1G04140.1	37.24	37.73
AT1G04140.2	45.28	46.33
AT1G04170.1	30.89	29.61
AT1G04190.1	17.92	18.27
AT1G04200.1	40.2	39.75
AT1G04220.1	42.73	40.3
AT1G04230.1	21.95	21.43
AT1G04240.1	49.18	50.85
AT1G04250.1	42.27	42.27
AT1G04260.1	24.26	25.62
AT1G04270.1	82.52	81.94
AT1G04270.2	83.22	81.51
AT1G04280.1	25	25.05
AT1G04290.1	7.28	7.53
AT1G04300.1	53.19	52.45
AT1G04300.2	51.88	51.66
AT1G04300.3	49.05	48.41
AT1G04300.4	66.32	65.78
AT1G04340.1	75.62	77.07
AT1G04360.1	36.07	36.87
AT1G04400.1	22.41	21.75
AT1G04400.2	22.41	21.75
AT1G04410.1	42.59	43.67
AT1G04430.1	42.05	41.77
AT1G04430.2	37.18	37.42
AT1G04440.1	40.91	41.8
AT1G04480.1	51.11	53.85
AT1G04510.1	52.73	54
AT1G04510.2	50.98	51.69
AT1G04520.1	76.33	77.36
AT1G04530.1	35.81	36.18
AT1G04550.1	51.72	53.57
AT1G04550.2	65.81	64.71
AT1G04555.1	80.28	82.61
AT1G04590.1	35.34	36.54
AT1G04590.2	45.66	45.66
AT1G04630.1	45.93	47.69
AT1G04635.1	80.92	82
AT1G04680.1	51.56	52.31
AT1G04690.1	63.04	63.44
AT1G04710.1	76.89	78.14
AT1G04750.1	41.87	41.67
AT1G04750.2	52.6	52.91
AT1G04770.1	40.69	42.75
AT1G04778.1	58.7	57.45
AT1G04780.1	73.83	74.53
AT1G04790.1	32.54	31.94
AT1G04810.1	56.41	55.95
AT1G04820.1	53.69	52.63
AT1G04830.1	44.37	45.73
AT1G04850.1	40.9	40.9
AT1G04860.1	53.59	54.5
AT1G04870.1	47.16	48.19
AT1G04870.2	41.07	42.78
AT1G04900.1	44.58	44.37
AT1G04910.1	47.2	45.56
AT1G04950.1	35.45	34.89
AT1G04950.2	35.64	35.09
AT1G04960.1	70.37	70.99
AT1G04960.2	43.35	43.45
AT1G04980.1	28.94	28.54
AT1G04985.1	57.69	59.32
AT1G05010.1	40.13	39.87
AT1G05060.1	21.01	21.01
AT1G05070.1	34.73	36.48
AT1G05090.1	22.29	22.65
AT1G05120.1	37.59	37.09
AT1G05150.1	50.13	50.51
AT1G05180.1	39.96	41.13
AT1G05180.2	43.9	44.52
AT1G05180.3	56.09	56.9
AT1G05190.1	50	51.24
AT1G05205.1	22.62	23.75
AT1G05240.1	37.97	37.85
AT1G05250.1	37.97	37.85
AT1G05260.1	80.58	79.55
AT1G05270.1	36.62	36.93
AT1G05320.1	38.68	39.63
AT1G05320.2	38.14	38.9
AT1G05320.3	38.14	38.68
AT1G05340.1	72.73	73.85
AT1G05350.1	37.65	38.2
AT1G05380.1	38.59	39.52
AT1G05380.2	40.85	41.84
AT1G05410.1	44.74	45.33
AT1G05410.2	56.98	58.47
AT1G05430.1	88.21	88.21
AT1G05460.1	40.93	41.61
AT1G05470.1	27.73	28.11
AT1G05500.1	49.09	49.63
AT1G05520.1	52.21	51.24
AT1G05590.1	47.36	48.04
AT1G05620.1	46.3	45.14
AT1G05620.2	76.41	75.35
AT1G05710.1	65.1	64.67
AT1G05710.2	82.46	83.93
AT1G05710.3	65.1	64.67
AT1G05710.4	65.1	64.67
AT1G05710.5	65.1	64.67
AT1G05720.1	56.67	55.19
AT1G05780.1	87.78	84.04
AT1G05790.1	36.39	36.66
AT1G05805.1	48.04	47.89
AT1G05810.1	40.16	40.32
AT1G05830.1	38.1	39.14
AT1G05830.2	41.26	42.06
AT1G05840.1	28.42	27.59
AT1G05850.1	35.22	37.06
AT1G05860.1	78.24	77.65
AT1G05870.1	85.88	86.36
AT1G05870.2	80.23	80.68
AT1G05870.3	80.23	80.68
AT1G05870.4	74.18	76.7
AT1G05890.1	60.48	63.8
AT1G05890.2	27.18	28.62
AT1G05910.1	56.56	55.94
AT1G05940.1	38.75	38.46
AT1G05960.1	60.59	60.72
AT1G05960.2	74.24	74.39
AT1G06000.1	59.22	60.9
AT1G06010.1	21.21	20.29
AT1G06060.1	28.65	28.5
AT1G06070.1	59.53	59.53
AT1G06110.1	15.47	15.9
AT1G06130.1	17.55	18.3
AT1G06130.2	15.65	15.31
AT1G06149.1	7.41	7.41
AT1G06150.2	68.01	65.92
AT1G06180.1	59.82	60.09
AT1G06190.1	43.95	45.38
AT1G06190.2	36.64	36.92
AT1G06200.1	51.55	52.36
AT1G06210.1	59.83	58.5
AT1G06210.2	40.86	40.57
AT1G06220.1	33.89	33.72
AT1G06220.2	33.89	33.58
AT1G06230.1	61.54	61.45
AT1G06230.2	61.54	61.45
AT1G06230.3	61.54	61.45
AT1G06290.1	39.37	39.43
AT1G06380.1	38.37	39.66
AT1G06390.1	59.11	59.42
AT1G06390.2	45.01	45.95
AT1G06400.1	34.13	35.86
AT1G06410.1	47.16	46.54
AT1G06420.1	63.47	64.24
AT1G06420.2	91.49	92.81
AT1G06470.1	38.81	39.18
AT1G06470.2	38.81	39.18
AT1G06475.1	86.6	90.32
AT1G06500.1	29.92	30.16
AT1G06500.2	29.92	30.16
AT1G06500.3	29.92	30.16
AT1G06500.4	29.92	30.16
AT1G06515.1	98.21	100
AT1G06515.2	98.21	100
AT1G06520.1	31.33	30.82
AT1G06530.1	57.35	58.61
AT1G06550.1	22.85	21.68
AT1G06570.1	47.65	46.85
AT1G06570.2	65.59	65.26
AT1G06620.1	47.34	46.78
AT1G06640.1	32.96	34.1
AT1G06640.2	74.03	75.5
AT1G06640.3	25.71	26.87
AT1G06650.1	11.26	10.96
AT1G06650.2	21.7	22.44
AT1G06670.1	47.24	46.55
AT1G06680.1	47.67	46.95
AT1G06700.1	18.29	18.82
AT1G06700.2	18	18.69
AT1G06720.1	34.66	35.16
AT1G06760.1	49.79	49.79
AT1G06780.1	53.37	54.32
AT1G06780.2	42.91	42.53
AT1G06790.1	74.64	73.58
AT1G06840.1	44.64	44.02
AT1G06850.1	24.22	24.39
AT1G06850.2	76.24	76.24
AT1G06890.1	37.28	36.34
AT1G06890.2	55.78	55.3
AT1G06890.3	44.35	44.35
AT1G06900.1	39.03	38.94
AT1G06910.1	36.59	36.1
AT1G06950.1	36.55	36.55
AT1G06960.1	74.41	75.85
AT1G06960.2	71.77	73.3
AT1G06960.3	76.5	76.92
AT1G07000.1	44.79	44.72
AT1G07020.1	43.7	45.04
AT1G07030.1	64.09	65.51
AT1G07040.1	38.33	36.74
AT1G07070.1	48	47.06
AT1G07080.1	24.21	25.63
AT1G07090.1	51.83	52.11
AT1G07110.1	38.19	37.83
AT1G07135.1	100	100
AT1G07140.1	75.98	75.61
AT1G07170.1	13.46	13.33
AT1G07170.2	41.75	41.35
AT1G07170.3	13.46	13.33
AT1G07175.1	4.69	4.41
AT1G07200.1	49.39	50.37
AT1G07200.2	33.64	33.99
AT1G07210.1	60.66	60.32
AT1G07230.1	41.29	41.05
AT1G07240.1	34.54	35.06
AT1G07250.1	79.3	78.21
AT1G07260.1	40.72	40.38
AT1G07300.1	33.91	34.51
AT1G07310.1	30.32	30.92
AT1G07320.1	30.21	31.14
AT1G07320.2	24.73	25.56
AT1G07320.3	24.82	25.86
AT1G07320.4	22.58	23.75
AT1G07350.1	48.37	47.85
AT1G07350.2	47.73	49.61
AT1G07360.1	62.59	63.32
AT1G07370.1	46.56	45.63
AT1G07420.1	29.69	29.8
AT1G07420.2	49.27	47.87
AT1G07470.1	58.31	57.96
AT1G07480.1	45.51	45.65
AT1G07480.2	45.51	45.65
AT1G07510.1	57.2	57.29
AT1G07520.1	75.75	75.97
AT1G07530.1	61.55	61.31
AT1G07590.1	54.31	56.42
AT1G07600.1	90.7	92.86
AT1G07610.1	100	100
AT1G07615.1	42.29	43.01
AT1G07630.1	63.02	61.97
AT1G07640.1	40.87	40.71
AT1G07640.2	41.46	41.18
AT1G07640.3	51.36	50.84
AT1G07660.1	33.67	34.38
AT1G07660.2	82.5	85.71
AT1G07670.1	52.59	51.65
AT1G07750.1	60.7	61.71
AT1G07770.1	96.85	98.4
AT1G07770.2	96.85	98.4
AT1G07780.1	80.73	80.14
AT1G07780.2	80.73	80.14
AT1G07780.3	80.73	80.14
AT1G07780.4	49.51	48.34
AT1G07780.5	80.73	80.14
AT1G07790.1	80.16	81.45
AT1G07810.1	22.85	23.51
AT1G07820.1	46.39	46.39
AT1G07820.2	46.39	46.39
AT1G07830.1	97.97	97.32
AT1G07840.1	28.12	28.22
AT1G07840.2	50.88	50.52
AT1G07840.3	38.67	38.08
AT1G07870.1	43.32	42.37
AT1G07870.2	44.57	43.31
AT1G07880.1	78.17	80.08
AT1G07880.2	46.05	46.84
AT1G07890.1	69.75	70.94
AT1G07890.2	67.77	70.09
AT1G07890.3	67.51	68.38
AT1G07890.4	66.94	69.23
AT1G07890.5	69.75	70.94
AT1G07890.6	62.96	64.29
AT1G07890.7	67.51	68.38
AT1G07890.8	69.75	70.94
AT1G07920.1	42.18	43.16
AT1G07930.1	42.33	41.95
AT1G07930.2	73.18	74.43
AT1G07940.1	41.1	41.67
AT1G07940.2	41.1	41.67
AT1G07950.1	5.33	5.3
AT1G07960.1	59.23	57.89
AT1G07960.2	44.62	43.61
AT1G07960.3	59.23	57.89
AT1G07980.1	40	39.29
AT1G07990.1	43.92	43.64
AT1G08000.1	38.97	40.79
AT1G08000.2	38.97	40.79
AT1G08010.1	32.98	32.75
AT1G08010.2	32.62	32.17
AT1G08030.1	32.6	33.47
AT1G08040.1	29.1	29.02
AT1G08040.2	29.02	29.02
AT1G08090.1	37.7	37.1
AT1G08110.1	36.2	33.91
AT1G08110.2	36.2	33.91
AT1G08110.3	36.2	33.91
AT1G08110.4	49.59	50
AT1G08125.1	48.67	49.66
AT1G08125.2	43.87	45.48
AT1G08125.3	35.07	36.86
AT1G08130.1	44.27	44.68
AT1G08160.1	68.53	68.53
AT1G08180.1	86.6	86.6
AT1G08190.1	67.95	67.95
AT1G08200.1	33.42	34.14
AT1G08290.1	51.76	51.92
AT1G08315.1	30.29	30
AT1G08320.1	58.69	61.28
AT1G08320.2	42.41	43.92
AT1G08320.3	49.15	51.22
AT1G08340.1	80.13	81.51
AT1G08360.1	61.27	63.78
AT1G08370.1	48.36	50.47
AT1G08380.1	43.26	42.96
AT1G08410.1	36.45	35.86
AT1G08420.1	50.14	50.34
AT1G08420.2	56.26	55.94
AT1G08450.1	49.87	49.49
AT1G08450.2	46.4	45.74
AT1G08450.3	41.71	41.16
AT1G08460.1	62.07	62.57
AT1G08470.1	46.72	47.31
AT1G08480.1	63.57	64.03
AT1G08510.1	40.53	41.85
AT1G08520.1	57.96	57.01
AT1G08530.1	28.7	28.45
AT1G08540.1	42.29	43.8
AT1G08550.1	60.89	61.71
AT1G08550.2	60.89	61.71
AT1G08560.1	41.95	42.96
AT1G08570.1	27.76	27.69
AT1G08570.2	23.5	24.12
AT1G08570.3	9.2	9.09
AT1G08570.4	9.2	9.09
AT1G08580.1	17.89	17.53
AT1G08590.1	28.15	27.73
AT1G08600.1	48.16	48.62
AT1G08600.2	44.29	44.97
AT1G08600.3	54.34	55.25
AT1G08600.4	54.12	54.99
AT1G08620.1	49.32	49.36
AT1G08620.2	49.32	49.36
AT1G08640.1	79.86	78.79
AT1G08650.1	73.51	73.78
AT1G08650.2	80.74	82.58
AT1G08660.1	30.82	30.48
AT1G08660.2	16.41	16.98
AT1G08680.1	30.18	30.95
AT1G08680.2	31.56	32.59
AT1G08680.3	29.91	29.8
AT1G08680.4	38.32	39.16
AT1G08700.1	36.54	37.09
AT1G08710.1	47.45	47.64
AT1G08710.2	43.06	43.82
AT1G08720.1	33.48	34.25
AT1G08760.1	56.97	57.2
AT1G08780.1	35.71	34.48
AT1G08800.1	59.29	58.47
AT1G08800.2	59.29	58.47
AT1G08820.1	35.86	36.83
AT1G08820.2	39	38.78
AT1G08830.1	24.32	25.17
AT1G08830.2	24.32	25.17
AT1G08880.1	27.82	29.37
AT1G08890.1	32.54	31.65
AT1G08930.1	16.95	16.8
AT1G08930.2	16.77	16.8
AT1G08940.1	47.35	46.1
AT1G08970.1	55.96	56.22
AT1G08970.2	50.91	51.61
AT1G08970.3	56.16	56.68
AT1G08970.4	49.77	50.23
AT1G08990.1	25.54	26.2
AT1G09000.1	37.69	37.71
AT1G09010.1	55.67	54.41
AT1G09020.1	24.89	24.69
AT1G09060.1	47.14	48.31
AT1G09060.2	47.14	48.31
AT1G09060.3	43.12	44.42
AT1G09070.1	18.18	18.3
AT1G09100.1	72.62	73.88
AT1G09130.1	54.79	55.89
AT1G09130.2	48.67	49.49
AT1G09130.3	46.33	45.53
AT1G09140.1	46.86	46.86
AT1G09140.2	55.86	55.43
AT1G09150.1	69.38	66.27
AT1G09160.1	60.43	60.29
AT1G09160.2	53.83	54.88
AT1G09200.1	72.5	71.31
AT1G09210.1	78.63	78.83
AT1G09250.1	93.4	92.46
AT1G09270.1	40.35	40.12
AT1G09270.2	40.9	40.54
AT1G09270.3	36.57	35.83
AT1G09280.1	26.09	26.14
AT1G09290.1	23.33	23.4
AT1G09300.2	65.43	64.58
AT1G09310.1	55.56	53.25
AT1G09320.1	23.58	23.87
AT1G09330.1	51.87	51.6
AT1G09415.1	93.26	93.26
AT1G09430.1	24.76	24.82
AT1G09440.1	35.54	36.1
AT1G09460.1	51.42	51.84
AT1G09470.1	48.7	47.62
AT1G09470.2	25.16	25
AT1G09560.1	53.71	52.51
AT1G09570.1	39.82	40.58
AT1G09570.2	42.82	43.89
AT1G09575.1	45.83	45.05
AT1G09580.1	46.67	47.57
AT1G09590.1	72.11	72.6
AT1G09620.1	32.54	33.14
AT1G09630.1	43.07	43.5
AT1G09640.1	36.48	37.05
AT1G09640.2	58.21	62.15
AT1G09645.1	16.04	17
AT1G09660.1	53.92	54.08
AT1G09660.2	49.62	49.62
AT1G09690.1	61.9	60.26
AT1G09700.1	49.62	50.64
AT1G09730.1	42.61	42.61
AT1G09730.2	36.62	36.94
AT1G09740.1	42.01	44.65
AT1G09750.1	27.78	28.65
AT1G09760.1	48.25	48.03
AT1G09770.1	53.21	54.07
AT1G09780.1	25.95	26.93
AT1G09794.1	100	100
AT1G09815.1	54.95	54.95
AT1G09830.1	26.5	26.21
AT1G09840.1	38.36	37.28
AT1G09840.2	38.32	37.53
AT1G09840.3	38.36	37.18
AT1G09840.4	38.32	37.53
AT1G09840.5	38.06	37.18
AT1G09840.6	38.36	37.18
AT1G09850.1	34.97	34.97
AT1G09870.1	40.95	41.03
AT1G09910.1	36.9	37.42
AT1G09920.1	42.44	39.46
AT1G09932.1	64.61	63.93
AT1G09932.2	60.85	58.37
AT1G09940.1	60.04	60.15
AT1G09970.1	54.77	53.66
AT1G09970.2	59.36	58.85
AT1G10020.1	60.57	60.98
AT1G10040.1	27.82	27.11
AT1G10040.2	33.33	32.73
AT1G10050.1	47.77	47.24
AT1G10070.1	70.65	73.32
AT1G10070.2	70.65	73.32
AT1G10070.3	53.65	55.59
AT1G10120.1	59.4	59.76
AT1G10130.1	45.4	46.33
AT1G10140.1	74.17	73.68
AT1G10150.1	30.68	31.12
AT1G10170.1	38.24	37.87
AT1G10180.1	60.45	60.61
AT1G10200.1	51.16	50.57
AT1G10230.1	21.23	21.47
AT1G10270.1	46	46.01
AT1G10290.1	56.37	57.32
AT1G10310.1	69.79	67.49
AT1G10320.1	40.94	41.01
AT1G10340.1	38.18	38.32
AT1G10340.2	32.66	32.19
AT1G10350.1	57.41	57.23
AT1G10380.1	57.2	56.98
AT1G10390.1	46.83	46.44
AT1G10390.2	46.83	46.49
AT1G10400.1	36.46	37.15
AT1G10410.1	31.06	31.47
AT1G10430.1	43.1	43.14
AT1G10450.1	39.45	38.89
AT1G10470.1	27.82	27.61
AT1G10480.1	21.76	22.7
AT1G10490.1	38.35	38.24
AT1G10500.1	69.41	67.43
AT1G10530.1	57.96	57.96
AT1G10550.1	19.93	19.93
AT1G10580.1	47.41	48.3
AT1G10590.1	87.41	86.76
AT1G10590.2	87.41	86.76
AT1G10590.3	89.33	88.74
AT1G10610.1	44.98	45.08
AT1G10630.1	46.24	47.34
AT1G10650.1	51.89	49.51
AT1G10650.2	50.21	48.79
AT1G10660.1	41.04	40.26
AT1G10670.1	24.88	25.38
AT1G10670.2	26.87	26.87
AT1G10670.3	24.15	25.18
AT1G10670.4	26.87	26.87
AT1G10700.1	35.34	35.7
AT1G10720.1	35.76	36.28
AT1G10730.1	16.47	16.39
AT1G10740.4	49.59	50.1
AT1G10760.1	37.99	37.36
AT1G10820.1	55.86	56.36
AT1G10820.2	57.98	56.79
AT1G10840.1	65.72	63.91
AT1G10840.2	53.33	53.56
AT1G10850.1	49.61	48.32
AT1G10865.1	10.94	11.29
AT1G10865.2	23.21	26
AT1G10870.1	61.66	60.61
AT1G10890.1	66.94	68.94
AT1G10900.1	42.99	42.72
AT1G10940.1	14.84	14.79
AT1G10940.2	46.36	47.89
AT1G10950.1	43.83	42.43
AT1G11000.1	59.14	59.65
AT1G11020.1	36.84	37.34
AT1G11050.1	67.49	65.55
AT1G11080.1	27.87	30.39
AT1G11080.2	22.84	24.2
AT1G11170.1	35.21	34.7
AT1G11170.2	44.87	41.54
AT1G11210.1	48.23	47.06
AT1G11220.1	59.8	60.81
AT1G11240.1	87.65	87.12
AT1G11260.1	43.21	43.29
AT1G11280.1	40.71	41.32
AT1G11280.2	44.21	44.88
AT1G11280.3	43.77	44.6
AT1G11280.4	39.48	39.97
AT1G11310.1	17.23	17.07
AT1G11310.2	27.82	27.61
AT1G11360.1	60.34	60.08
AT1G11360.2	55.65	55.19
AT1G11360.3	54.77	54.55
AT1G11360.4	52.32	51.88
AT1G11380.1	34.77	36.78
AT1G11400.1	38.95	38.29
AT1G11400.2	37.79	36.93
AT1G11400.3	37.79	36.93
AT1G11430.1	67.66	67.66
AT1G11440.1	22.69	22.29
AT1G11450.1	47.2	47.58
AT1G11450.2	28.81	29.51
AT1G11475.1	100	97.1
AT1G11480.1	57.22	57.22
AT1G11480.2	69.83	69.83
AT1G11530.1	71.79	68.29
AT1G11540.1	23.36	23.16
AT1G11545.1	54.1	55.18
AT1G11580.1	73.21	75.49
AT1G11650.1	51.86	51.7
AT1G11650.2	63.59	63.33
AT1G11660.1	30.87	30.83
AT1G11670.1	35.44	36.17
AT1G11680.1	71.88	72.19
AT1G11750.1	62.3	62.55
AT1G11750.2	66.42	67.42
AT1G11760.1	58.55	55.97
AT1G11840.1	36.88	37.55
AT1G11840.2	32.75	33.57
AT1G11840.3	37.01	37.55
AT1G11840.4	37.01	37.55
AT1G11840.5	47.6	46.58
AT1G11840.6	35.96	35.74
AT1G11860.1	70	69.9
AT1G11860.2	70	69.9
AT1G11860.3	43.22	42.89
AT1G11890.1	46.77	46.77
AT1G11905.1	65.77	65.47
AT1G11910.1	57.17	57.76
AT1G11930.1	38.06	40.52
AT1G11930.2	29.24	29.74
AT1G11960.1	48.67	48.34
AT1G12000.1	41.68	43.01
AT1G12010.1	32.13	34.88
AT1G12020.1	36.89	37.56
AT1G12040.1	50.54	49.91
AT1G12050.1	34.75	33.74
AT1G12060.1	41.97	42.41
AT1G12080.1	97.14	97.14
AT1G12080.2	98.06	100
AT1G12090.1	62.93	65.77
AT1G12110.1	37.29	38.27
AT1G12120.1	33.33	34.03
AT1G12140.1	46.77	47.99
AT1G12140.2	37.18	37.1
AT1G12160.1	43.14	42.67
AT1G12200.1	64.26	65.37
AT1G12230.1	44.53	45.36
AT1G12230.2	38.67	38.57
AT1G12240.1	48.09	48.31
AT1G12270.1	43.86	44.03
AT1G12310.1	64.19	63.76
AT1G12320.1	75.88	75.88
AT1G12360.1	44.75	44.1
AT1G12390.1	16.81	17.86
AT1G12400.1	47.14	54.1
AT1G12410.1	28.24	28.14
AT1G12420.1	69.58	67.05
AT1G12430.1	29.98	30.26
AT1G12430.2	37.37	37.46
AT1G12440.1	35.06	36.24
AT1G12440.2	35.1	35.57
AT1G12470.1	43.28	43.11
AT1G12500.1	58.57	60.45
AT1G12520.1	62.33	61.9
AT1G12520.2	75.47	75.12
AT1G12520.3	43.37	42.11
AT1G12530.1	26.54	27.04
AT1G12580.1	33.94	33.6
AT1G12650.1	51.66	53.96
AT1G12650.2	47.39	49.02
AT1G12650.3	51.66	53.96
AT1G12650.4	50.24	51.96
AT1G12680.1	36.95	36.7
AT1G12750.1	59.74	59.74
AT1G12750.2	45.4	45.98
AT1G12750.3	59.62	59.81
AT1G12760.1	47.79	47.22
AT1G12760.2	42.14	42.26
AT1G12770.1	42.05	41.5
AT1G12780.1	37.18	38.99
AT1G12810.1	72.28	68.87
AT1G12810.2	96.5	95.17
AT1G12820.1	50.36	51.36
AT1G12830.1	8.79	8.65
AT1G12840.1	27.63	28.15
AT1G12850.1	79.85	79.85
AT1G12880.1	58.94	60.4
AT1G12910.1	69.28	68.09
AT1G12920.1	51.32	51.69
AT1G12930.1	46.69	46.73
AT1G12970.1	68.83	68.24
AT1G13000.1	26.19	25.92
AT1G13000.2	26.19	25.92
AT1G13020.1	43.3	43.38
AT1G13030.1	35.5	35.3
AT1G13060.1	40.68	40.84
AT1G13060.2	43.84	43.54
AT1G13090.1	45.76	46.33
AT1G13110.1	53.23	54.66
AT1G13120.1	68.66	69.54
AT1G13160.1	17.75	18.19
AT1G13170.1	52.33	52.72
AT1G13170.2	62.86	63.84
AT1G13190.1	29.87	29.93
AT1G13210.1	39.73	39.06
AT1G13220.1	44.99	44.73
AT1G13220.2	41.69	42.62
AT1G13245.1	47.5	52.78
AT1G13250.1	37.2	36.75
AT1G13260.1	47.02	49.07
AT1G13280.1	29.6	28.7
AT1G13300.1	16.27	16.22
AT1G13320.1	60.69	61.97
AT1G13320.2	51.87	53.47
AT1G13320.3	57.07	58.17
AT1G13340.1	31.09	31.25
AT1G13350.1	51.75	51.89
AT1G13350.2	25.48	25.24
AT1G13360.1	59.61	61.42
AT1G13360.2	63.55	66.84
AT1G13360.3	93.05	94.57
AT1G13380.1	28.81	30.36
AT1G13390.1	81.92	81.92
AT1G13390.2	49.43	49.14
AT1G13420.1	41.56	41.97
AT1G13430.1	68.79	69.59
AT1G13440.1	71.26	72.62
AT1G13440.2	40.26	40.19
AT1G13450.1	44.53	43.93
AT1G13450.2	32.08	32.94
AT1G13450.3	75	74.7
AT1G13460.1	41.51	40.24
AT1G13460.2	41.51	40.24
AT1G13480.1	45.78	45.41
AT1G13520.1	37.31	37.4
AT1G13530.1	33.25	33.42
AT1G13560.1	47.09	47.09
AT1G13560.2	48.97	49.26
AT1G13590.1	14.12	14.81
AT1G13600.1	80.35	78.09
AT1G13620.1	24.74	25
AT1G13640.1	62.25	61.64
AT1G13670.1	44.16	43.5
AT1G13690.1	46.01	47.47
AT1G13730.1	40.88	41.79
AT1G13740.1	41.08	40.82
AT1G13830.1	38.79	38.1
AT1G13870.1	30.51	30.41
AT1G13880.1	32.76	33.67
AT1G13900.1	30.34	30.43
AT1G13920.1	70.53	69.61
AT1G13930.1	69.66	70.63
AT1G13930.2	68.24	70.63
AT1G13930.3	68.24	70.63
AT1G13950.1	22.52	23.13
AT1G13960.1	25.58	25.64
AT1G13960.2	28.25	28.12
AT1G13970.1	55.96	57.02
AT1G13980.1	49.13	48.32
AT1G13980.2	49.13	48.32
AT1G13990.1	28.36	28.78
AT1G13990.2	32.01	31.49
AT1G14000.1	54.85	55.39
AT1G14010.1	40.61	42.33
AT1G14040.1	34.24	35.03
AT1G14060.1	17.31	17.2
AT1G14120.1	87.17	88.33
AT1G14140.1	44.08	43.09
AT1G14160.1	69.08	70.44
AT1G14170.1	41.74	44.44
AT1G14170.2	40.8	43.63
AT1G14170.3	59.83	61.08
AT1G14190.1	36.83	36.5
AT1G14200.1	36.87	35.87
AT1G14210.1	57.92	59.53
AT1G14230.1	54.75	56.67
AT1G14290.1	52.46	53.14
AT1G14300.1	39.21	38.74
AT1G14300.2	19.62	19.83
AT1G14320.1	83.49	82.33
AT1G14320.2	58.71	58.33
AT1G14330.1	43.95	43.85
AT1G14340.1	64.46	65.96
AT1G14350.1	62.03	62.56
AT1G14350.2	62.03	62.56
AT1G14360.1	24.47	24.92
AT1G14380.1	64.83	64.38
AT1G14380.2	44.97	44.5
AT1G14380.3	64.83	64.38
AT1G14400.1	35.42	36.43
AT1G14400.2	35.42	35.66
AT1G14450.1	91.04	95.31
AT1G14510.1	17.99	18.07
AT1G14570.1	40.81	40.09
AT1G14570.2	40.94	40.31
AT1G14570.3	41.04	40.28
AT1G14570.4	41.04	40.28
AT1G14610.1	42.56	42.88
AT1G14620.1	65.12	64.52
AT1G14620.2	59.9	59.02
AT1G14630.1	47.2	48.56
AT1G14640.1	31.91	33.72
AT1G14650.1	35.72	36.02
AT1G14650.2	35.77	36.16
AT1G14670.1	37.73	37.32
AT1G14685.1	17.84	18.18
AT1G14685.2	17.84	18.18
AT1G14685.3	17.84	18.39
AT1G14690.1	26.33	26.76
AT1G14690.2	26.33	26.76
AT1G14710.1	32.51	32.39
AT1G14710.2	32.51	32.45
AT1G14720.1	50.78	51.26
AT1G14730.1	59.49	56.86
AT1G14740.1	37.85	37.07
AT1G14810.1	42.78	44.2
AT1G14830.1	20.21	20.14
AT1G14870.1	55.19	59.86
AT1G14890.1	21.95	22.84
AT1G14900.1	44.75	44.26
AT1G14910.1	18.63	17.96
AT1G14980.1	92.05	94.19
AT1G15000.1	31.54	31.75
AT1G15020.1	66.73	67.12
AT1G15020.2	29.55	30.58
AT1G15040.1	30.1	31.25
AT1G15040.2	34.8	34.59
AT1G15060.1	36.59	36.46
AT1G15100.1	62.67	65.28
AT1G15110.1	26.72	26.14
AT1G15110.2	16.67	16.59
AT1G15120.1	20.69	19.05
AT1G15120.2	51.81	53.42
AT1G15125.1	23.81	23.51
AT1G15130.1	41.83	41.52
AT1G15200.1	53.8	52.91
AT1G15200.2	49.45	51.13
AT1G15200.3	59.17	59.61
AT1G15200.4	73.28	74.42
AT1G15210.1	56.26	56.26
AT1G15230.1	67.13	69.57
AT1G15250.1	69.05	67.86
AT1G15270.1	47.06	46.15
AT1G15280.1	48.09	48.71
AT1G15280.2	47.18	47.35
AT1G15290.1	43.71	43.86
AT1G15310.1	39.61	40.22
AT1G15340.1	37.88	37.63
AT1G15340.2	29.92	30.54
AT1G15350.1	76.39	75.34
AT1G15350.2	76.39	76.39
AT1G15350.3	93.07	87.04
AT1G15370.1	88.31	89.4
AT1G15380.1	83.23	86.88
AT1G15380.2	83.23	86.88
AT1G15390.1	56.02	56.23
AT1G15400.1	28.12	27.27
AT1G15400.2	40.8	39.84
AT1G15400.3	57.25	56.82
AT1G15420.1	53.82	55.08
AT1G15430.1	15.02	15.08
AT1G15440.1	49.43	48.66
AT1G15470.1	25.55	25.55
AT1G15480.1	67.59	69.26
AT1G15500.1	33.78	33.78
AT1G15530.1	28.46	28.64
AT1G15550.1	70.75	69.78
AT1G15570.1	47.2	47.55
AT1G15660.1	62.62	62.29
AT1G15670.1	19.55	20.71
AT1G15690.1	36.27	35.46
AT1G15690.2	73.73	74.36
AT1G15700.1	13.49	13.42
AT1G15710.1	29.5	29.5
AT1G15720.1	38.87	39.4
AT1G15740.1	69.14	68.45
AT1G15750.1	32.53	33.92
AT1G15750.2	32.53	33.92
AT1G15750.3	26.7	27.77
AT1G15750.4	32.53	33.92
AT1G15780.1	35.47	35.68
AT1G15810.1	46.23	45.41
AT1G15820.1	97.32	96.95
AT1G15860.1	42.42	43.95
AT1G15860.2	42.42	43.95
AT1G15860.3	14.47	14.53
AT1G15880.1	39.07	38.53
AT1G15910.1	43.46	44.73
AT1G15920.1	10.29	10.49
AT1G15920.2	10.29	10.49
AT1G15930.1	52.94	50.7
AT1G15930.2	52.94	51.06
AT1G15940.1	45.12	45.24
AT1G15950.1	46.18	45.07
AT1G15950.2	27.53	26.93
AT1G15970.1	56.38	56.55
AT1G16000.1	62.34	64
AT1G16010.1	49.89	50.56
AT1G16010.2	47.22	48.07
AT1G16010.3	49.89	50.56
AT1G16040.1	30.32	30.32
AT1G16060.1	64.44	64.44
AT1G16060.2	31.1	30
AT1G16170.1	54.88	55.56
AT1G16180.1	58.54	57.53
AT1G16180.2	58.54	57.53
AT1G16190.1	39.03	39.83
AT1G16210.1	81	75
AT1G16220.1	49.25	50.33
AT1G16240.1	55.8	54.59
AT1G16240.2	56.56	54.59
AT1G16240.3	79.64	81.48
AT1G16270.1	51.13	51.83
AT1G16270.2	49.05	49.63
AT1G16300.1	56.25	55.56
AT1G16340.1	32.85	32.73
AT1G16340.2	32.85	32.73
AT1G16340.3	32.85	32.73
AT1G16340.4	35.82	36.2
AT1G16350.1	26.24	25.1
AT1G16400.1	71.46	71.88
AT1G16460.1	54.95	52.6
AT1G16460.2	39.88	38.97
AT1G16460.3	54.95	52.6
AT1G16460.4	54.95	52.6
AT1G16470.1	67.23	68.7
AT1G16470.2	57.87	59.13
AT1G16520.1	46.82	47.78
AT1G16530.1	93.37	96.88
AT1G16560.1	57.31	56.97
AT1G16560.2	54.49	54.01
AT1G16560.3	57.31	56.97
AT1G16560.4	43.42	43.73
AT1G16610.1	40.75	41.42
AT1G16610.2	40.06	38.65
AT1G16610.3	40.8	40.69
AT1G16630.1	31.41	31.65
AT1G16670.1	61.58	62.57
AT1G16680.1	52.39	51.35
AT1G16700.1	73.57	75.23
AT1G16740.1	54.46	56.48
AT1G16810.1	71.15	73.27
AT1G16810.2	71.15	73.27
AT1G16840.1	59.71	59.29
AT1G16840.2	100	97.16
AT1G16840.3	61.94	59.29
AT1G16840.4	61.94	58.87
AT1G16858.1	92.31	100
AT1G16860.1	52.16	51.72
AT1G16870.1	45.47	46.07
AT1G16880.1	47.9	48.93
AT1G16890.1	3.85	3.74
AT1G16890.2	87.31	88.64
AT1G16890.3	46.62	46.94
AT1G16916.1	69.23	66.18
AT1G16920.1	52.43	53.73
AT1G17060.1	25.74	26.36
AT1G17070.1	33.12	31.99
AT1G17080.1	22.15	22.76
AT1G17110.1	37.23	37.44
AT1G17110.2	43.92	44.43
AT1G17130.1	46.15	47.26
AT1G17130.2	47.56	47.71
AT1G17140.1	20.65	20.58
AT1G17140.2	14.89	14.65
AT1G17145.1	52.43	52.09
AT1G17160.1	37.63	36.36
AT1G17160.2	51.12	51.41
AT1G17170.1	54.71	56.74
AT1G17190.1	41.94	43.13
AT1G17210.1	28.77	29.07
AT1G17220.1	31.4	31.19
AT1G17280.1	25.93	25.57
AT1G17280.2	23.39	23.18
AT1G17290.1	27.92	27.6
AT1G17330.1	59.04	57.51
AT1G17340.1	42.78	42.39
AT1G17350.1	47.16	48.87
AT1G17360.1	61.76	63.09
AT1G17370.1	52.74	52.22
AT1G17370.2	77.48	79.44
AT1G17380.1	31.62	30.58
AT1G17430.1	54.43	52.66
AT1G17440.1	29.88	28.67
AT1G17440.2	37.17	35.65
AT1G17455.1	45.71	44.86
AT1G17455.2	45.71	45.28
AT1G17470.1	32.87	32.15
AT1G17470.2	32.87	32.15
AT1G17490.1	100	100
AT1G17500.1	36.55	36.64
AT1G17510.1	89.19	91.67
AT1G17520.1	42.28	43.89
AT1G17530.1	21.05	21.28
AT1G17550.1	27.09	27.36
AT1G17580.1	50.91	50.95
AT1G17620.1	23.95	24.36
AT1G17665.1	26.05	27.27
AT1G17680.1	40.29	39.39
AT1G17680.2	39.18	38.31
AT1G17690.1	45.52	46.33
AT1G17720.1	61.15	64.03
AT1G17720.2	60.95	63.3
AT1G17730.1	45.41	44.72
AT1G17745.1	49.6	49.6
AT1G17745.2	48.92	49.23
AT1G17760.1	55.42	55.49
AT1G17780.2	30.12	29.18
AT1G17820.1	58.01	58.23
AT1G17860.1	35.75	35.36
AT1G17880.1	47.06	50.35
AT1G17890.1	66.98	65.56
AT1G17890.2	76	76.71
AT1G17890.3	67.81	67.39
AT1G17930.1	44.99	45.18
AT1G17980.1	62.12	61.23
AT1G17980.2	66.67	68.94
AT1G18030.1	38.73	39.41
AT1G18030.2	46.38	47
AT1G18060.1	49.77	49.33
AT1G18070.1	64.92	63.76
AT1G18070.2	62.05	60.95
AT1G18070.3	51.26	52.06
AT1G18080.1	32.81	31.91
AT1G18150.1	43.99	45.6
AT1G18150.2	34.58	34.95
AT1G18150.3	43.99	45.6
AT1G18160.1	19.61	19.61
AT1G18190.1	35.36	34.79
AT1G18210.1	35	36.6
AT1G18210.2	35	35.67
AT1G18250.1	28.87	26.29
AT1G18250.2	28.57	26.17
AT1G18260.1	47.78	47.99
AT1G18270.1	46.96	47.52
AT1G18270.2	46.99	47.48
AT1G18270.3	43.7	44.18
AT1G18300.1	31.47	30.85
AT1G18370.1	39.62	40.25
AT1G18450.1	59.68	60.23
AT1G18470.1	60.89	60.62
AT1G18470.2	62.5	63.25
AT1G18480.1	56.71	57
AT1G18490.1	8.92	8.96
AT1G18500.1	47.64	46.23
AT1G18540.1	31.71	29.02
AT1G18570.1	46.13	45.15
AT1G18580.1	42.26	43.16
AT1G18590.1	40.35	39.66
AT1G18630.1	72.37	69.62
AT1G18660.1	50.53	50.31
AT1G18660.2	50.53	50.31
AT1G18660.3	50.32	50
AT1G18660.4	66.19	66.19
AT1G18670.1	35.11	35.41
AT1G18700.1	27.38	26.92
AT1G18700.2	26.74	26.29
AT1G18700.3	52.76	52.76
AT1G18700.4	37.2	37.27
AT1G18720.1	30.15	31.09
AT1G18740.1	21.82	22.64
AT1G18800.1	41.52	40.43
AT1G18840.1	52.54	52.94
AT1G18840.2	49.53	48.61
AT1G18850.1	58.37	59.7
AT1G18860.1	62.02	60.71
AT1G18880.1	62.3	61.01
AT1G18890.1	62.62	62.5
AT1G18950.1	62.79	61.71
AT1G18970.1	44.71	44.5
AT1G19000.1	62.2	60.54
AT1G19000.2	59.45	57.85
AT1G19010.1	24.1	25.26
AT1G19010.2	34.78	35.82
AT1G19020.1	2.78	2.86
AT1G19050.1	43.48	47.12
AT1G19080.1	11.93	12.65
AT1G19080.2	11.93	12.65
AT1G19110.1	25.82	26.25
AT1G19120.1	72.58	75
AT1G19130.1	47.13	45.81
AT1G19180.1	37.23	36.29
AT1G19180.2	45.12	47.44
AT1G19220.1	39.56	40.58
AT1G19240.1	43.16	46.59
AT1G19300.1	44.59	43.56
AT1G19310.1	15.53	15.45
AT1G19350.1	26.28	27.8
AT1G19350.3	50.15	50
AT1G19350.4	26.28	27.8
AT1G19350.5	26.28	27.8
AT1G19350.6	26.28	27.8
AT1G19360.1	49.3	49.3
AT1G19370.1	40.07	39.97
AT1G19396.1	24	26.09
AT1G19396.3	92	93.88
AT1G19397.1	79.8	84.95
AT1G19400.1	12.94	12.59
AT1G19400.2	12.94	12.46
AT1G19430.1	45.16	43.72
AT1G19440.1	29.13	28.46
AT1G19485.1	36.03	36.49
AT1G19485.2	51.72	52.26
AT1G19520.1	18.81	18.73
AT1G19520.2	39.11	40.23
AT1G19530.1	96.91	96.91
AT1G19550.1	31.25	29.41
AT1G19570.1	56.02	56.02
AT1G19570.2	35.78	38.83
AT1G19580.1	49.8	47.13
AT1G19580.2	24.77	25.35
AT1G19600.1	68.01	67.05
AT1G19660.1	28.31	28.66
AT1G19660.2	36	36.34
AT1G19690.1	68.75	69.34
AT1G19700.1	36.87	36.73
AT1G19700.2	42.75	42.58
AT1G19700.3	42.75	42.58
AT1G19710.1	50.44	50.89
AT1G19730.1	31.4	32.48
AT1G19740.1	69	69.26
AT1G19770.1	38.79	37.71
AT1G19800.1	60.4	59.54
AT1G19800.2	61.7	60.11
AT1G19800.3	60.4	59.54
AT1G19835.1	26.47	26.27
AT1G19835.2	26.02	26.16
AT1G19870.1	52.12	51.77
AT1G19880.1	18.95	18.98
AT1G19910.1	58.9	57.14
AT1G19920.1	39.23	39.07
AT1G19950.1	67.42	68.2
AT1G19990.1	31.88	31.73
AT1G20010.1	50	50.12
AT1G20050.1	63.89	65.71
AT1G20090.1	52.79	56.22
AT1G20100.1	31.73	33.73
AT1G20100.2	26.87	27.41
AT1G20110.1	43.3	42.91
AT1G20140.1	61.9	57.59
AT1G20160.1	44.71	46.58
AT1G20160.2	39.89	41.35
AT1G20190.1	92.18	92.15
AT1G20200.1	58.72	57.58
AT1G20220.1	31.7	31.34
AT1G20225.1	62.86	61.11
AT1G20260.1	59.23	59.61
AT1G20270.1	53.21	55.56
AT1G20300.1	55.7	55.39
AT1G20330.1	48.43	48.43
AT1G20340.1	32.93	33.74
AT1G20370.1	31.61	31.25
AT1G20410.1	58.14	57.82
AT1G20430.1	53.04	52.14
AT1G20440.1	96.31	95.87
AT1G20450.1	37.32	39
AT1G20450.2	48.57	51.26
AT1G20460.1	79.63	81.9
AT1G20510.1	44.96	44.14
AT1G20510.2	37.28	36.97
AT1G20560.1	28.09	26.79
AT1G20560.2	35.97	35.67
AT1G20575.1	31.93	32.48
AT1G20580.1	82.26	82.93
AT1G20590.1	25	26.63
AT1G20610.1	41.71	41.28
AT1G20620.1	71.06	70.46
AT1G20620.2	52.37	53.3
AT1G20620.4	54.04	53.89
AT1G20620.5	48.59	47.97
AT1G20630.1	15.91	16.09
AT1G20670.1	37.37	37.17
AT1G20693.1	28.23	28.93
AT1G20693.2	23.81	25.86
AT1G20693.3	24.19	25.64
AT1G20696.1	77.05	77.69
AT1G20696.2	13.74	13.95
AT1G20696.3	94.35	95.12
AT1G20700.1	40.4	42.11
AT1G20760.1	42.19	42.87
AT1G20770.1	63.68	61.84
AT1G20840.1	23.01	23.17
AT1G20850.1	47.01	47.69
AT1G20900.1	46.03	48.94
AT1G20920.1	44.04	44.97
AT1G20920.2	48.95	50.06
AT1G20930.1	51.8	53.2
AT1G20950.1	46.4	47.19
AT1G20970.1	46.52	46.44
AT1G20980.1	35.14	34.93
AT1G21000.1	33.63	33.48
AT1G21000.2	47.88	47.46
AT1G21050.1	48.28	46.67
AT1G21065.1	36.45	38.05
AT1G21080.1	51.52	52.39
AT1G21080.2	70.79	69.23
AT1G21080.3	57.81	59.94
AT1G21090.1	59.67	59.34
AT1G21100.1	43.21	43.09
AT1G21110.1	42.4	41.41
AT1G21120.1	66.57	64.78
AT1G21130.1	29.4	29.4
AT1G21130.2	60.33	58.79
AT1G21140.1	44.16	46.03
AT1G21160.1	37.65	38.97
AT1G21170.1	39.26	38.93
AT1G21190.1	34.83	36.47
AT1G21200.1	32.08	31.07
AT1G21210.1	45.99	48.01
AT1G21310.1	49.75	52.97
AT1G21370.1	38.92	39.39
AT1G21370.2	38.92	39.39
AT1G21380.1	16.63	16.77
AT1G21390.1	48.96	51.3
AT1G21440.1	48.15	49.37
AT1G21450.1	31.02	30.85
AT1G21560.1	22.33	23.36
AT1G21560.2	27.79	28.76
AT1G21560.3	27.79	28.76
AT1G21600.1	55	56.41
AT1G21600.2	44.59	44.87
AT1G21610.1	38.4	39.07
AT1G21610.2	38.62	38.8
AT1G21610.3	50	51.27
AT1G21630.1	29.55	29.61
AT1G21630.2	31.16	31.22
AT1G21640.1	42.09	41.37
AT1G21640.2	43.9	43.5
AT1G21660.1	37.55	37.33
AT1G21680.1	35.27	35.88
AT1G21700.1	21.68	21.76
AT1G21710.1	69.19	69.97
AT1G21720.1	13.4	12.87
AT1G21730.1	60.88	59.43
AT1G21740.1	51.93	52.09
AT1G21750.1	34.56	33.68
AT1G21750.2	44.28	44.19
AT1G21760.1	54.31	55.19
AT1G21770.1	60	58.25
AT1G21780.1	48.52	47.74
AT1G21780.2	48.52	47.9
AT1G21790.1	22.38	21.99
AT1G21830.1	51.15	49.72
AT1G21880.1	76.9	77.43
AT1G21880.2	44.59	44
AT1G21900.1	43.63	42.18
AT1G21910.1	57.35	55.76
AT1G21920.1	70.32	72.98
AT1G21930.1	92.13	95.35
AT1G21980.1	41.05	40.49
AT1G22030.1	81.23	80.24
AT1G22065.1	62.5	59.7
AT1G22070.1	31	30.03
AT1G22190.1	62.55	62.31
AT1G22200.1	54.4	53.12
AT1G22200.2	26.15	25.99
AT1G22220.1	16.72	16.67
AT1G22230.1	35.62	36.62
AT1G22270.1	13.68	14.04
AT1G22280.1	57.35	60.15
AT1G22280.2	42.78	40.49
AT1G22280.3	59.58	61.29
AT1G22300.1	44.44	45.41
AT1G22300.2	56.1	58.23
AT1G22300.3	43.5	44.77
AT1G22310.1	54.3	54.59
AT1G22310.2	51.72	51.41
AT1G22330.1	37.35	38.4
AT1G22360.1	69.9	68.9
AT1G22360.2	23.42	23.87
AT1G22410.1	42.35	41.62
AT1G22440.1	71.05	68.83
AT1G22450.1	64.25	65.34
AT1G22470.1	19.84	19.08
AT1G22500.1	31.65	31.56
AT1G22520.1	84.85	83.17
AT1G22520.2	68.89	67.76
AT1G22530.1	74.67	73.71
AT1G22620.1	41.78	43.2
AT1G22640.1	63.57	61.89
AT1G22700.2	42.41	40.73
AT1G22710.1	51.56	51.66
AT1G22730.1	29.02	29.97
AT1G22740.1	61.69	62.94
AT1G22780.1	42.86	43.15
AT1G22790.1	41.71	44.9
AT1G22790.2	35.07	37.56
AT1G22800.1	42.82	41.76
AT1G22840.1	50.93	53.92
AT1G22840.2	33.71	32.61
AT1G22882.1	23.85	24.47
AT1G22885.1	52.94	54
AT1G22885.2	32.69	32.69
AT1G22910.1	96.14	95.73
AT1G22910.2	50	48.5
AT1G22910.3	98.8	98.8
AT1G22920.1	35.38	36.18
AT1G22930.1	46.25	46.21
AT1G22930.2	39.92	39.49
AT1G22950.1	79.04	80.05
AT1G22990.1	62.14	59.18
AT1G23020.1	47.02	46.27
AT1G23020.2	57.85	56.58
AT1G23030.1	52.91	52.4
AT1G23040.1	32.81	35
AT1G23080.1	57.24	57.05
AT1G23080.2	24.65	24.46
AT1G23080.3	40.74	40
AT1G23100.1	36.84	38.46
AT1G23120.1	31.62	31.39
AT1G23149.1	72.92	68.63
AT1G23150.1	20	21.13
AT1G23190.1	40.17	39.93
AT1G23205.1	72.07	74.14
AT1G23220.1	50.42	50.42
AT1G23260.1	47.52	44.97
AT1G23280.1	72.08	71
AT1G23290.1	40.43	42.22
AT1G23310.1	52.86	53.62
AT1G23310.2	58.5	57.85
AT1G23330.1	50.42	52.06
AT1G23380.1	40.82	38.97
AT1G23380.2	64.38	63.19
AT1G23390.1	42.71	44.27
AT1G23400.1	44.55	44.22
AT1G23410.1	23.74	24.44
AT1G23440.1	33.18	32.72
AT1G23490.1	46.37	47.98
AT1G23530.1	57.39	58.38
AT1G23560.1	42.67	40.13
AT1G23710.1	32.86	33.45
AT1G23720.1	75.54	74.54
AT1G23750.1	89.15	85.19
AT1G23780.1	34.17	34.31
AT1G23800.1	38.79	38.49
AT1G23820.1	53.57	52.85
AT1G23820.2	72.48	73.37
AT1G23850.1	52.21	54.94
AT1G23860.1	24.06	24.73
AT1G23860.2	24.06	24.73
AT1G23860.3	20.36	20.86
AT1G23860.4	59.02	59.02
AT1G23870.1	69.82	69.34
AT1G23890.2	62.63	61.68
AT1G23900.1	36.4	36.31
AT1G23900.2	36.4	36.4
AT1G23950.1	80.99	80.08
AT1G23950.2	54.72	54.42
AT1G23950.3	56.58	57.06
AT1G23950.4	75.82	77.08
AT1G23950.5	59.52	59.7
AT1G23960.1	70.71	73.26
AT1G23960.2	70.71	73.26
AT1G23970.1	74.6	76.23
AT1G23970.2	52.63	53.91
AT1G24050.1	40.33	42.2
AT1G24100.1	61.42	60.7
AT1G24120.1	37.53	37.44
AT1G24150.1	28.21	27.93
AT1G24160.1	63.6	63.21
AT1G24160.2	56.22	56.34
AT1G24170.1	21.41	21.74
AT1G24180.1	42.63	42.86
AT1G24190.1	50.93	51.17
AT1G24190.2	56.77	56.91
AT1G24240.1	32.23	33.5
AT1G24267.1	29.94	29.76
AT1G24267.2	65.77	65.96
AT1G24280.1	45.73	45.97
AT1G24300.1	34.39	34.75
AT1G24300.2	34.92	35.44
AT1G24310.1	15.32	15.19
AT1G24350.1	64.74	66.89
AT1G24350.2	56.35	56.8
AT1G24350.3	52.25	54.39
AT1G24360.1	53.33	56.19
AT1G24450.1	38.6	36.46
AT1G24490.1	26.22	26.72
AT1G24490.2	47.27	46.71
AT1G24510.1	42.33	42.75
AT1G24510.2	30.28	29.66
AT1G24560.1	34.24	34.08
AT1G24575.1	84.88	93.59
AT1G24600.1	58.06	61.02
AT1G24620.1	30.41	28.89
AT1G24625.1	73.06	73.82
AT1G24764.1	57.34	60.18
AT1G24793.1	57.23	56.69
AT1G24793.2	24.02	23.02
AT1G24800.1	43.55	44.2
AT1G24807.1	61.84	62.67
AT1G24851.1	56.31	55.77
AT1G24880.1	27.87	27.87
AT1G24880.2	18.52	20.2
AT1G24880.3	35.14	37.5
AT1G24881.1	43.55	44.2
AT1G24909.1	12.81	12.09
AT1G25025.1	33.17	34.01
AT1G25054.1	27.87	27.87
AT1G25054.2	57.23	56.51
AT1G25055.1	43.55	43.98
AT1G25083.1	37.75	35.98
AT1G25112.1	33.17	34.01
AT1G25145.1	57.23	56.69
AT1G25150.1	43.55	43.98
AT1G25155.1	12.81	12.09
AT1G25180.1	33.17	34.01
AT1G25210.1	42.29	41.11
AT1G25210.2	30.03	30.95
AT1G25211.1	37.71	38.56
AT1G25220.1	37.21	37.8
AT1G25220.2	20.73	21.27
AT1G25230.1	41.16	41.16
AT1G25250.1	35.51	34.34
AT1G25260.1	84.47	86.05
AT1G25275.1	86.67	97.01
AT1G25275.2	68.06	68.06
AT1G25275.3	29.76	32.47
AT1G25280.1	41.01	40.24
AT1G25280.2	43.1	42.04
AT1G25280.3	46.84	44.76
AT1G25350.1	31.55	31.34
AT1G25350.2	28.08	27.57
AT1G25370.1	52.76	54.92
AT1G25380.1	43.64	43.02
AT1G25400.1	43.16	42.86
AT1G25400.2	40.71	39.72
AT1G25420.1	39.43	39.94
AT1G25420.2	32.53	32.4
AT1G25420.3	13.65	13.28
AT1G25422.1	50.53	55.17
AT1G25490.1	34.32	34.32
AT1G25510.1	25.16	25.16
AT1G25520.1	33.33	32.44
AT1G25530.1	48.86	49.77
AT1G25540.1	47.81	47.08
AT1G25540.2	52.87	51.63
AT1G25550.1	34.39	34.07
AT1G25560.1	50.99	51.86
AT1G25570.1	46.09	45.95
AT1G25580.1	48.23	47
AT1G25682.1	26.57	27.54
AT1G25988.1	42.04	41.77
AT1G26110.1	41.47	41.24
AT1G26110.2	48.25	48.07
AT1G26150.1	58.65	58.1
AT1G26240.1	48.18	46.7
AT1G26250.1	89.62	89.2
AT1G26260.1	75.85	78.11
AT1G26260.2	75.85	78.11
AT1G26260.3	37.9	36.62
AT1G26270.1	44.59	45.48
AT1G26300.1	31.76	31.65
AT1G26300.2	40.09	41.87
AT1G26340.1	27.13	26.52
AT1G26440.1	58.84	60.6
AT1G26440.2	44.47	43.72
AT1G26440.3	44.47	43.72
AT1G26440.4	58.6	56.94
AT1G26450.1	35.37	34.94
AT1G26460.1	35.23	34.53
AT1G26470.1	98.47	99.23
AT1G26520.1	44.92	44.79
AT1G26550.1	84.8	86.07
AT1G26580.1	26.51	27.02
AT1G26620.1	33.37	34.16
AT1G26630.1	49.04	49.68
AT1G26630.2	97.87	99.28
AT1G26640.1	28.66	28.57
AT1G26660.1	51.49	52.27
AT1G26660.2	72.05	72.5
AT1G26665.1	32.94	32.56
AT1G26665.2	29.41	28.74
AT1G26670.1	38.32	37.85
AT1G26690.1	72.5	75.92
AT1G26740.1	47.54	47.15
AT1G26750.1	23.56	22.78
AT1G26760.1	49.91	50.47
AT1G26800.1	40	39.8
AT1G26830.1	60.03	60.03
AT1G26850.1	42.98	43.57
AT1G26850.2	40.5	41.48
AT1G26850.3	41.48	41.52
AT1G26880.1	98.11	100
AT1G26880.2	100	100
AT1G26910.1	46.08	44.64
AT1G26920.1	89.87	89.31
AT1G26930.1	20.62	20.72
AT1G26940.1	59.09	57.27
AT1G26960.1	54.7	54.7
AT1G27000.1	28.38	28.2
AT1G27020.1	23.61	24.16
AT1G27030.1	56.9	56.31
AT1G27050.1	43.08	42
AT1G27090.1	56.19	56.19
AT1G27100.1	32.42	31.78
AT1G27130.1	64.68	65.89
AT1G27150.1	44.39	42.31
AT1G27190.1	32.96	32.96
AT1G27210.1	48.3	47.45
AT1G27290.1	71.43	75.22
AT1G27290.2	56.91	61.95
AT1G27300.1	53.71	51.93
AT1G27310.1	51.38	52.34
AT1G27320.1	30.31	30.27
AT1G27330.1	32.26	33.33
AT1G27340.1	55.29	56.14
AT1G27350.1	90.48	93.44
AT1G27380.2	61.76	65.62
AT1G27390.1	62.25	67.2
AT1G27400.1	98.69	98.05
AT1G27430.1	41.55	41.86
AT1G27435.1	100	98.68
AT1G27450.1	28.19	28.19
AT1G27450.2	19.23	19.55
AT1G27450.3	32.12	34.51
AT1G27470.1	20.9	21.22
AT1G27510.1	43.58	43.37
AT1G27520.1	41.94	41.79
AT1G27530.1	50.63	50.63
AT1G27565.1	83.33	76.92
AT1G27600.1	40.49	40.6
AT1G27600.2	40.49	40.6
AT1G27620.1	27.36	27.3
AT1G27630.1	39.43	40.98
AT1G27650.1	59.93	58.48
AT1G27650.2	72.27	70.35
AT1G27670.1	42.06	43.95
AT1G27695.1	5.62	5.32
AT1G27695.2	5.81	5.32
AT1G27700.1	46.23	47
AT1G27730.1	55.56	56.93
AT1G27752.1	39.16	38.58
AT1G27752.2	49.11	50.83
AT1G27760.1	70.07	71.08
AT1G27760.2	69.4	71.29
AT1G27760.3	74.65	75.18
AT1G27770.1	26.45	26.35
AT1G27770.2	28.71	29.08
AT1G27840.1	45.39	46.98
AT1G27840.2	50.39	50.79
AT1G27840.3	60.63	61.47
AT1G27920.1	32.6	32.35
AT1G27930.1	40.99	40.56
AT1G27950.1	56.07	53.59
AT1G27970.1	85.32	84.55
AT1G27970.2	90.68	90.68
AT1G27980.1	79.08	79.23
AT1G28050.1	45.48	44.94
AT1G28060.1	63.54	63.95
AT1G28090.3	72.82	74.36
AT1G28100.3	67.14	68.12
AT1G28110.1	22	22.15
AT1G28120.1	29.49	30.1
AT1G28130.1	31.66	31.34
AT1G28130.2	49.67	48.69
AT1G28140.1	50.51	51.03
AT1G28150.1	60	61.61
AT1G28190.1	43.09	44.35
AT1G28200.1	69.96	70.71
AT1G28240.1	38.39	37.43
AT1G28250.1	14.43	14.74
AT1G28280.1	48.56	50.75
AT1G28280.2	50	51.53
AT1G28290.1	34.77	31.9
AT1G28290.2	36.07	36.36
AT1G28320.1	40.17	41.64
AT1G28330.1	48.21	52.94
AT1G28330.2	35.9	38.89
AT1G28330.3	46.02	49.06
AT1G28330.4	46.43	49.06
AT1G28330.5	47.65	50.71
AT1G28340.1	40.81	40.84
AT1G28350.1	41.09	41.44
AT1G28370.1	57.93	58.18
AT1G28380.1	38.94	40.7
AT1G28390.1	85.44	85.08
AT1G28390.2	51.98	54.23
AT1G28395.1	0	0
AT1G28395.2	0	0
AT1G28395.3	59.04	58.33
AT1G28395.4	67.47	68.29
AT1G28395.5	87.18	86.08
AT1G28400.1	37.4	37.84
AT1G28410.1	24.91	25.68
AT1G28440.1	38.52	39.59
AT1G28480.1	67.94	70.08
AT1G28490.1	51.32	51.54
AT1G28490.2	57.95	54.55
AT1G28510.1	63.92	65.16
AT1G28520.1	50.84	51.93
AT1G28520.2	69.56	68.89
AT1G28540.1	64.13	67.82
AT1G28580.1	63.66	64.86
AT1G28580.2	35.1	35.22
AT1G28680.1	34.34	35.07
AT1G28960.1	30.21	31.18
AT1G28960.2	35.34	36.1
AT1G28960.3	30.21	31.18
AT1G28960.4	35.34	36.36
AT1G28960.5	30.1	31.18
AT1G29000.1	71.49	74.18
AT1G29025.1	35.34	34.71
AT1G29030.1	59.21	60.34
AT1G29040.1	44.95	45.41
AT1G29040.2	29.95	30.43
AT1G29040.3	64.97	65.38
AT1G29040.4	49.49	49
AT1G29050.1	51.17	52.25
AT1G29060.1	52.76	51.94
AT1G29100.1	31.25	31.75
AT1G29150.1	77.59	77.03
AT1G29160.1	46.06	45.51
AT1G29220.1	36.42	37.82
AT1G29220.2	48.75	47.56
AT1G29250.1	42.15	41.46
AT1G29260.1	50.45	50.75
AT1G29270.1	75.51	78.17
AT1G29280.1	52.89	52.03
AT1G29300.1	45.73	44.19
AT1G29310.1	27.59	27.77
AT1G29320.1	34.25	33.41
AT1G29330.1	32.35	32.2
AT1G29340.1	39.26	39.05
AT1G29350.1	37.8	37.62
AT1G29370.1	38.84	39.17
AT1G29380.1	59.67	59.42
AT1G29400.1	69.54	68.24
AT1G29400.2	69.54	68.24
AT1G29418.1	98.63	100
AT1G29470.1	41.45	40.38
AT1G29470.2	46.6	45.53
AT1G29520.1	40.54	40.27
AT1G29550.1	61.86	64.32
AT1G29560.1	51.37	50.83
AT1G29560.2	35.01	34.5
AT1G29760.1	38.7	38.33
AT1G29790.1	26.95	26.16
AT1G29790.2	30.45	29.06
AT1G29810.1	75.14	77.71
AT1G29820.1	50.57	51.66
AT1G29820.2	47.7	48.26
AT1G29850.1	92.66	90.99
AT1G29850.2	92.66	89.38
AT1G29850.3	35.11	32.86
AT1G29880.1	62.29	62.11
AT1G29890.1	60.81	60.13
AT1G29890.2	62.7	62.81
AT1G29900.1	69.46	69.58
AT1G29910.1	45.05	45.22
AT1G29920.1	51.84	51.65
AT1G29930.1	40.67	39.78
AT1G29940.1	47.59	47.43
AT1G29950.1	27.2	27.71
AT1G29950.2	32.77	32.76
AT1G29951.1	95.12	92.86
AT1G29952.1	72.22	72.22
AT1G29965.1	67.53	68.42
AT1G29970.1	46.45	47.06
AT1G29970.2	76.71	77.51
AT1G29970.3	22.84	23.08
AT1G29980.1	15.02	14.52
AT1G29980.2	28.57	28.27
AT1G29990.1	15.04	15.6
AT1G30000.1	60.3	58.75
AT1G30070.1	53.43	51.66
AT1G30090.1	55.82	56.9
AT1G30110.1	46.34	44.71
AT1G30110.2	46.63	44.71
AT1G30120.1	34.87	33.92
AT1G30130.1	18.09	18.35
AT1G30130.2	19.43	20.15
AT1G30200.1	26.98	26.84
AT1G30200.2	26.98	26.84
AT1G30230.1	32.73	32.88
AT1G30230.2	18.36	19.42
AT1G30270.1	45.26	46.46
AT1G30320.1	32.28	32.83
AT1G30330.1	47.99	47.93
AT1G30330.2	53.15	53.58
AT1G30360.1	34.14	34.14
AT1G30370.1	62.55	62.55
AT1G30400.1	48	48.06
AT1G30400.2	50.85	50.75
AT1G30440.1	53.99	55.11
AT1G30450.1	27.69	27.81
AT1G30450.2	27.72	27.81
AT1G30450.3	27.72	27.78
AT1G30460.1	45.58	45.66
AT1G30470.1	56.84	57.27
AT1G30470.2	39.79	40.26
AT1G30470.3	63.99	65.12
AT1G30480.1	65.92	66.11
AT1G30490.1	40.02	39.93
AT1G30510.1	42.94	41.95
AT1G30510.2	43.44	42.45
AT1G30510.3	44.25	46.01
AT1G30580.1	61.97	60.68
AT1G30620.1	50	48.91
AT1G30620.2	50	48.91
AT1G30620.3	49.26	48.54
AT1G30630.1	60.15	58.84
AT1G30650.1	42.34	41.58
AT1G30690.1	41.06	41.06
AT1G30690.2	34.84	35.05
AT1G30700.1	35.74	36.25
AT1G30720.1	51.72	52.83
AT1G30730.1	28.35	27.98
AT1G30750.1	60.12	63.03
AT1G30755.1	42.23	41.88
AT1G30760.1	55.88	54.72
AT1G30810.2	29.61	28.96
AT1G30820.1	35.53	36.27
AT1G30840.1	50.53	49.23
AT1G30840.2	50.53	50.13
AT1G30880.1	89	88.24
AT1G30900.1	67.59	66.51
AT1G30910.1	50.98	50.98
AT1G30970.1	56.08	56.93
AT1G30970.2	39.78	40.81
AT1G31050.1	40.2	40
AT1G31070.1	56.38	56.38
AT1G31070.2	29.06	29.06
AT1G31120.1	39.02	37.33
AT1G31130.1	69.66	70.38
AT1G31150.1	57.4	58.64
AT1G31170.1	61.02	60.5
AT1G31170.2	61.02	60.5
AT1G31170.3	94.87	94.07
AT1G31180.1	68.87	69.05
AT1G31230.1	53.4	53.4
AT1G31280.1	53.4	53.35
AT1G31320.1	57.65	58.33
AT1G31330.1	44.23	44.66
AT1G31335.1	32.76	33.33
AT1G31340.1	14.81	15.15
AT1G31350.1	67.66	68
AT1G31360.1	26.35	26.58
AT1G31360.2	53.75	53.75
AT1G31420.1	31.79	31.2
AT1G31420.2	31.73	31.25
AT1G31440.1	40.35	40.35
AT1G31600.1	24.71	26.16
AT1G31600.2	43.28	44.89
AT1G31600.3	24.71	26.16
AT1G31660.1	17.06	16.98
AT1G31710.1	46.2	48.03
AT1G31730.1	34.89	36.07
AT1G31770.1	28.59	29.18
AT1G31780.1	42.81	42.81
AT1G31810.1	50.87	51.35
AT1G31812.1	34.88	31.91
AT1G31817.1	79.02	77.4
AT1G31850.1	38.99	39.26
AT1G31850.2	38.99	39.33
AT1G31850.3	40.24	41.45
AT1G31860.1	89.01	88.69
AT1G31870.1	45.51	46.52
AT1G31870.2	46.9	48.11
AT1G31910.1	38.11	39.41
AT1G31910.2	36.93	38.06
AT1G31930.1	36.65	36.88
AT1G31930.2	36.65	36.88
AT1G31930.3	36.65	36.88
AT1G31940.1	70.55	69.59
AT1G31950.1	21.69	22.46
AT1G31970.1	50.9	51.62
AT1G32050.1	58.58	61.09
AT1G32070.2	66.54	65.81
AT1G32090.1	32.67	32.67
AT1G32100.1	49.83	49.32
AT1G32130.1	39.45	41.57
AT1G32130.2	36.92	38.01
AT1G32150.1	57.3	57.77
AT1G32170.1	51.54	53.53
AT1G32190.1	41	41.99
AT1G32190.2	52.54	51.31
AT1G32210.1	48.11	51
AT1G32230.1	56.99	55.77
AT1G32230.2	32.91	33.27
AT1G32230.3	34.44	34.83
AT1G32240.1	48.11	49.2
AT1G32260.1	69.95	74.42
AT1G32340.1	58.98	59.61
AT1G32360.1	24.47	24.67
AT1G32400.1	72.99	73.26
AT1G32400.2	28.83	29.09
AT1G32400.3	72.26	72.89
AT1G32410.1	0	0
AT1G32410.2	1.5	1.46
AT1G32410.3	0	0
AT1G32410.4	0	0
AT1G32410.5	0	0
AT1G32440.1	23.8	23.84
AT1G32450.1	34.23	36.11
AT1G32460.1	73.75	72.84
AT1G32490.1	31.58	31.26
AT1G32490.2	33.85	33.61
AT1G32500.1	62.09	62.73
AT1G32530.1	20.03	20
AT1G32580.1	59.62	59.9
AT1G32630.1	62.61	67.29
AT1G32640.1	50.83	51.09
AT1G32700.1	44.16	46.77
AT1G32700.2	23.67	26.32
AT1G32760.1	55.62	54.94
AT1G32790.1	54.76	54.29
AT1G32790.2	52.66	50.98
AT1G32810.2	29.92	30.04
AT1G32870.1	42.78	42.78
AT1G32870.2	43.6	43.44
AT1G32920.1	32.39	31.94
AT1G32990.1	33.33	32.51
AT1G33040.1	40.22	39.15
AT1G33050.1	35.08	35.39
AT1G33050.2	43.76	43.84
AT1G33050.3	51.59	51.59
AT1G33050.4	35.08	35.39
AT1G33060.1	54.91	55.78
AT1G33060.2	50.16	50.55
AT1G33110.1	36.49	36.12
AT1G33120.1	67.02	67.74
AT1G33140.1	70.68	72.58
AT1G33170.1	30	29.68
AT1G33230.1	33.62	34.22
AT1G33240.1	33.39	33.6
AT1G33250.1	51.66	51.76
AT1G33265.1	74.71	75.14
AT1G33290.1	27.08	27.01
AT1G33290.2	27.95	26.95
AT1G33360.1	39.67	40
AT1G33390.1	45.63	45.07
AT1G33410.1	32.67	32.48
AT1G33410.2	44.34	44.61
AT1G33470.1	46.58	49.51
AT1G33470.2	47.71	51.23
AT1G33480.1	42.24	39.36
AT1G33490.1	33.14	34.76
AT1G33520.1	75.06	73.83
AT1G33590.1	27.49	26.73
AT1G33680.1	77.03	77.35
AT1G33700.1	32.86	33.26
AT1G33700.2	33.37	33.66
AT1G33750.1	34.59	33.74
AT1G33780.1	23.19	23.77
AT1G33790.1	29.56	30.48
AT1G33790.2	52.03	53.45
AT1G33800.1	40.35	39.93
AT1G33810.1	5.26	5.15
AT1G33970.1	31.56	31.08
AT1G33970.2	34.59	33.85
AT1G33970.3	85.3	83.8
AT1G33970.4	31.56	31.08
AT1G33970.5	31.56	31.08
AT1G33980.1	50.33	50.88
AT1G33980.2	60.48	60.88
AT1G33990.1	23.56	23.49
AT1G34010.1	57.95	55.68
AT1G34020.1	31.03	29.91
AT1G34030.1	38.93	40.85
AT1G34040.1	23.73	23.78
AT1G34130.1	58.57	57.68
AT1G34150.1	26.88	27.57
AT1G34160.1	58.33	57.07
AT1G34190.1	35.64	35.25
[truncated: 13,454 more rows]

## Sheet: F8
F8 Root Control vs. Root Salt PPV, 3’ UTR
transcript	sensitivity	PPV
AT1G01010.1	100	98.95
AT1G01020.2	97.89	97.89
AT1G01040.1	100	100
AT1G01040.2	100	100
AT1G01050.1	100	100
AT1G01070.1	65.91	65.91
AT1G01090.1	49.25	47.83
AT1G01100.1	86.89	86.89
AT1G01100.2	98.53	98.53
AT1G01100.3	86.89	86.89
AT1G01100.4	86.89	86.89
AT1G01120.1	100	100
AT1G01160.1	0	0
AT1G01160.2	0	0
AT1G01170.1	53.85	56
AT1G01180.1	70.42	72.46
AT1G01210.1	77.05	81.03
AT1G01230.1	82.54	82.54
AT1G01240.1	73.33	64.71
AT1G01240.2	73.33	64.71
AT1G01240.3	73.33	64.71
AT1G01260.1	59.49	57.32
AT1G01260.2	71.7	74.51
AT1G01260.3	100	100
AT1G01290.1	44.71	44.19
AT1G01290.2	53.57	51.72
AT1G01300.1	100	98.77
AT1G01340.1	100	100
AT1G01340.2	100	100
AT1G01350.1	48.39	50
AT1G01360.1	15.05	16.47
AT1G01430.1	36.54	45.24
AT1G01440.1	100	100
AT1G01470.1	14.58	15.56
AT1G01490.1	85.26	84.38
AT1G01490.2	95.04	93.5
AT1G01510.1	14.06	12.5
AT1G01540.1	67.37	71.51
AT1G01540.2	59.34	55.67
AT1G01550.1	98.59	98.59
AT1G01550.2	98.59	98.59
AT1G01610.1	55.17	53.93
AT1G01620.1	51.43	50
AT1G01620.2	40	38.89
AT1G01630.1	100	100
AT1G01640.1	87.5	89.09
AT1G01640.2	87.5	89.09
AT1G01650.1	31.82	33.65
AT1G01650.2	31.82	33.65
AT1G01670.1	0	0
AT1G01690.1	100	100
AT1G01730.1	72.58	75
AT1G01780.1	51.79	51.79
AT1G01800.1	100	100
AT1G01800.2	100	100
AT1G01820.1	57.97	61.54
AT1G01830.1	0	0
AT1G01830.2	0	0
AT1G01830.3	0	0
AT1G01910.1	94.67	94.67
AT1G01910.2	67.8	67.8
AT1G01910.3	38.69	38.46
AT1G01910.4	54.1	53.66
AT1G01910.5	67.8	67.8
AT1G01920.1	83.33	85.71
AT1G01920.2	65.85	71.05
AT1G01930.1	100	100
AT1G01940.1	37.29	37.93
AT1G01950.1	23.44	24.59
AT1G01950.2	23.44	24.59
AT1G01950.3	23.44	24.59
AT1G01960.1	85.29	77.33
AT1G01990.1	73	75.26
AT1G02000.1	100	100
AT1G02050.1	100	100
AT1G02080.1	0	0
AT1G02080.2	0	0
AT1G02090.1	20.34	18.18
AT1G02090.2	35.96	35.56
AT1G02090.3	75.6	75.34
AT1G02100.1	30.25	29.75
AT1G02100.2	42.11	45.28
AT1G02100.3	96.63	96.63
AT1G02110.1	100	100
AT1G02120.1	54.55	52.63
AT1G02130.1	29.87	31.94
AT1G02140.1	60.92	59.55
AT1G02145.1	24.39	24.39
AT1G02145.2	24.39	24.39
AT1G02145.3	24.39	24.39
AT1G02145.4	24.39	24.39
AT1G02150.1	94.44	94.44
AT1G02160.1	26.15	25.76
AT1G02160.2	92.11	94.59
AT1G02170.1	87.8	83.72
AT1G02220.1	100	100
AT1G02280.1	92.86	92.86
AT1G02280.2	92.96	92.96
AT1G02305.1	0	0
AT1G02330.1	100	100
AT1G02335.1	100	100
AT1G02410.1	35.9	35.9
AT1G02500.1	100	100
AT1G02500.2	100	100
AT1G02560.1	39.45	43
AT1G02610.1	90	92.31
AT1G02640.1	80.95	80.95
AT1G02680.1	51.72	55.05
AT1G02690.1	95.08	95.08
AT1G02690.2	95.08	95.08
AT1G02730.1	100	100
AT1G02750.1	65.12	59.57
AT1G02750.2	15.56	16.28
AT1G02780.1	74.75	76.29
AT1G02840.1	94.74	98.63
AT1G02840.2	98.62	99.07
AT1G02840.3	100	98.7
AT1G02860.1	87.93	86.44
AT1G02860.2	87.93	86.44
AT1G02870.1	23.08	25
AT1G02880.3	72.55	71.15
AT1G02880.4	72.55	71.15
AT1G02890.1	95.74	94.74
AT1G02890.2	95.74	94.74
AT1G02900.1	24.19	23.81
AT1G02920.1	98.55	98.55
AT1G02950.1	89.13	93.18
AT1G02950.2	89.13	93.18
AT1G02950.3	100	100
AT1G02950.4	89.13	93.18
AT1G02960.1	46.34	52.78
AT1G02960.2	46.34	52.78
AT1G02960.3	98.26	95.76
AT1G02990.1	89.97	91.5
AT1G02990.2	65.09	64.49
AT1G02990.3	65.09	64.49
AT1G03030.1	94.51	97.75
AT1G03040.1	30.83	31.62
AT1G03040.2	30.83	31.62
AT1G03080.1	44.83	40
AT1G03090.1	82.08	76.32
AT1G03090.2	82.08	76.32
AT1G03130.1	86.57	87.88
AT1G03140.1	100	100
AT1G03150.1	81.82	83.33
AT1G03200.1	100	100
AT1G03220.1	73.61	74.65
AT1G03230.1	52.73	54.55
AT1G03250.1	64.29	63.38
AT1G03250.2	57.35	60.94
AT1G03280.1	61.76	62.38
AT1G03290.1	NA	NA
AT1G03290.2	100	100
AT1G03330.1	100	100
AT1G03350.1	76.19	76.19
AT1G03360.1	80.65	87.72
AT1G03365.1	71.15	71.15
AT1G03370.1	73.17	75
AT1G03380.1	58.75	58.75
AT1G03430.1	42.31	37.93
AT1G03457.1	36.73	40.45
AT1G03457.2	36.73	40.45
AT1G03470.1	43	43
AT1G03470.2	43	43
AT1G03475.1	61.25	62.82
AT1G03530.1	100	100
AT1G03550.1	45.71	45.07
AT1G03560.1	53.93	56.47
AT1G03590.1	100	100
AT1G03610.1	86.36	85.59
AT1G03740.1	100	100
AT1G03740.2	84	83.44
AT1G03750.1	100	100
AT1G03760.1	100	100
AT1G03770.1	100	100
AT1G03770.2	100	100
AT1G03770.3	100	100
AT1G03780.1	32.46	32.74
AT1G03780.2	100	100
AT1G03780.3	100	100
AT1G03820.1	97.67	97.67
AT1G03830.1	37.93	42.31
AT1G03830.2	100	100
AT1G03850.1	76.85	76.85
AT1G03850.2	41.03	38.1
AT1G03860.1	98.98	98.98
AT1G03860.2	98.98	98.98
AT1G03860.3	98.98	98.98
AT1G03870.1	100	100
AT1G03900.1	84.15	80.23
AT1G03910.2	52.24	47.95
AT1G03950.1	47.06	48.48
AT1G03970.1	100	100
AT1G04030.1	69.09	71.03
AT1G04040.1	60.42	64.44
AT1G04070.1	35.96	35.96
AT1G04080.1	64.06	65.08
AT1G04080.2	64.06	65.08
AT1G04080.3	31.03	29.67
AT1G04120.1	41.73	45.3
AT1G04120.2	23.08	25.21
AT1G04130.1	78.95	77.59
AT1G04140.1	36.43	34.56
AT1G04140.2	37.4	35.51
AT1G04170.1	100	100
AT1G04190.1	18.97	18.03
AT1G04200.1	100	100
AT1G04220.1	88.37	95
AT1G04230.1	96.08	96.08
AT1G04240.1	74.8	73.85
AT1G04250.1	59.34	61.36
AT1G04260.1	37.66	39.73
AT1G04270.1	49.4	55.41
AT1G04270.2	49.4	55.41
AT1G04280.1	16.42	16.42
AT1G04290.1	83.02	83.02
AT1G04300.1	92.16	92.16
AT1G04300.2	92.16	92.16
AT1G04300.3	92.16	92.16
AT1G04300.4	100	100
AT1G04340.1	90.54	90.54
AT1G04360.1	100	100
AT1G04400.1	98.21	94.83
AT1G04400.2	100	98.18
AT1G04410.1	66.09	67.86
AT1G04430.1	62.86	61.11
AT1G04430.2	96.83	100
AT1G04440.1	100	100
AT1G04480.1	44.44	42.67
AT1G04510.1	95.24	96.77
AT1G04510.2	95.24	96.77
AT1G04520.1	37.68	33.77
AT1G04530.1	60.71	59.3
AT1G04550.1	36.75	37.89
AT1G04550.2	78.64	77.14
AT1G04555.1	88.89	93.02
AT1G04590.1	75.86	77.19
AT1G04590.2	75.86	77.19
AT1G04630.1	100	100
AT1G04635.1	100	100
AT1G04680.1	87.2	86.14
AT1G04690.1	96.19	93.52
AT1G04710.1	95.59	95.59
AT1G04750.1	59.7	63.49
AT1G04750.2	34.69	39.08
AT1G04770.1	43.55	44.26
AT1G04778.1	0	0
AT1G04780.1	76.92	75.76
AT1G04790.1	87.88	87
AT1G04810.1	93.55	96.67
AT1G04820.1	63.49	67.8
AT1G04830.1	100	100
AT1G04850.1	82	75.93
AT1G04860.1	77.78	77.78
AT1G04870.1	81.93	86.08
AT1G04870.2	81.93	86.08
AT1G04900.1	62.04	61.82
AT1G04910.1	97.4	93.75
AT1G04950.1	86.4	85.04
AT1G04950.2	86.4	85.04
AT1G04960.1	81.94	86.96
AT1G04960.2	84.29	86.96
AT1G04980.1	100	100
AT1G04985.1	84.06	85.29
AT1G05010.1	100	100
AT1G05060.1	98.61	97.26
AT1G05070.1	100	100
AT1G05120.1	57.75	59.42
AT1G05150.1	90.48	90.48
AT1G05180.1	39.19	38.16
AT1G05180.2	39.19	38.16
AT1G05180.3	93.33	91.3
AT1G05190.1	68	66.67
AT1G05205.1	87.32	87.32
AT1G05240.1	100	100
AT1G05250.1	27.1	29.59
AT1G05260.1	0	0
AT1G05270.1	100	96
AT1G05320.1	100	100
AT1G05320.2	100	100
AT1G05320.3	100	100
AT1G05340.1	68.75	68.75
AT1G05350.1	100	100
AT1G05380.1	12.32	11.89
AT1G05380.2	12.32	11.89
AT1G05410.1	100	100
AT1G05410.2	100	100
AT1G05430.1	19.23	21.28
AT1G05460.1	29.58	30
AT1G05470.1	69.92	69.4
AT1G05500.1	98.94	98.94
AT1G05520.1	29.41	27.4
AT1G05570.1	24.53	23.21
AT1G05570.2	24.53	23.21
AT1G05590.1	68.18	68.18
AT1G05620.1	47.27	50.98
AT1G05620.2	47.27	50.98
AT1G05710.1	97.37	98.67
AT1G05710.2	97.26	100
AT1G05710.3	97.37	98.67
AT1G05710.4	97.37	98.67
AT1G05710.5	97.37	98.67
AT1G05720.1	7.35	7.14
AT1G05780.1	94.03	94.03
AT1G05790.1	73.53	67.57
AT1G05805.1	42.86	41.49
AT1G05810.1	100	100
AT1G05830.1	54.95	55.45
AT1G05830.2	98.17	99.07
AT1G05840.1	100	100
AT1G05850.1	54.46	55
AT1G05860.1	90.53	87.76
AT1G05870.1	32.84	31.43
AT1G05870.2	49.51	49.51
AT1G05870.3	91.43	92.49
AT1G05870.4	74.47	76.42
AT1G05890.1	58.04	57.14
AT1G05890.2	56.96	55.7
AT1G05910.1	46.67	44.68
AT1G05940.1	76.71	76.71
AT1G05960.1	68	68.79
AT1G05960.2	59.43	61.54
AT1G06000.1	35.48	34.92
AT1G06010.1	89.22	85.85
AT1G06060.1	81.36	80.67
AT1G06070.1	100	100
AT1G06110.1	89.36	93.33
AT1G06130.1	80	84.71
AT1G06130.2	80	84.71
AT1G06149.1	39.76	38.96
AT1G06150.2	83.78	84.93
AT1G06180.1	100	100
AT1G06190.1	100	100
AT1G06190.2	29.81	29.25
AT1G06200.1	69.66	69.66
AT1G06210.1	100	100
AT1G06210.2	40.72	39.13
AT1G06220.1	74.26	75
AT1G06220.2	74.26	75
AT1G06230.1	82.12	82.67
AT1G06230.2	82.12	82.67
AT1G06230.3	62.73	64.49
AT1G06290.1	96.59	97.7
AT1G06380.1	100	100
AT1G06390.1	37.38	37.74
AT1G06390.2	39.78	42.05
AT1G06400.1	83.13	82.14
AT1G06410.1	52.8	51.52
AT1G06420.1	45.1	42.99
AT1G06420.2	45.1	42.99
AT1G06470.1	50	44.87
AT1G06470.2	50	44.87
AT1G06475.1	100	100
AT1G06500.1	97.44	95
AT1G06500.2	100	100
AT1G06500.3	97.44	95
AT1G06500.4	100	100
AT1G06515.1	31.4	28.12
AT1G06515.2	31.4	28.12
AT1G06520.1	93.1	93.1
AT1G06550.1	100	100
AT1G06570.1	100	100
AT1G06570.2	84.81	84.81
AT1G06620.1	39.66	41.07
AT1G06640.1	98.88	100
AT1G06640.2	84.28	84.81
AT1G06640.3	92.24	93.04
AT1G06650.1	63.83	61.22
AT1G06650.2	32.08	31.48
AT1G06670.1	65.52	60
AT1G06680.1	59.21	58.44
AT1G06700.1	36.96	39.08
AT1G06700.2	36.56	39.08
AT1G06720.1	100	100
AT1G06760.1	86.21	86.21
AT1G06780.1	100	100
AT1G06780.2	100	100
AT1G06790.1	44	45.83
AT1G06840.1	72.41	65.62
AT1G06850.1	100	100
AT1G06850.2	98.32	95.9
AT1G06890.1	95.83	95.83
AT1G06890.2	95.83	95.83
AT1G06890.3	61.19	56.16
AT1G06900.1	100	100
AT1G06910.1	32.93	33.33
AT1G06950.1	49.02	50
AT1G06960.1	73.21	71.93
AT1G06960.2	15.87	14.93
AT1G06960.3	73.21	71.93
AT1G07000.1	100	100
AT1G07020.1	100	100
AT1G07030.1	92.86	95.59
AT1G07040.1	96.94	95.96
AT1G07070.1	52.27	51.11
AT1G07080.1	91.18	90.29
AT1G07090.1	53.33	51.95
AT1G07110.1	78.46	80.95
AT1G07135.1	98.7	95
AT1G07140.1	65.69	62.62
AT1G07170.1	97.67	93.18
AT1G07170.2	100	100
AT1G07170.3	98.84	98.84
AT1G07200.1	70.53	71.28
AT1G07200.2	72.28	73.74
AT1G07210.1	50.51	50.51
AT1G07230.1	94.12	93.02
AT1G07240.1	100	100
AT1G07250.1	100	100
AT1G07260.1	100	100
AT1G07300.1	100	100
AT1G07310.1	81.18	80.23
AT1G07320.1	77.78	81.25
AT1G07320.2	67.26	73.08
AT1G07320.3	0	0
AT1G07320.4	46.67	46.67
AT1G07350.1	98.9	94.74
AT1G07350.2	60.19	59.43
AT1G07360.1	66.67	57.63
AT1G07370.1	29.79	30.43
AT1G07420.1	58.82	59.52
AT1G07420.2	49.41	50.6
AT1G07470.1	75.32	77.33
AT1G07480.1	98.19	98.19
AT1G07480.2	98.19	98.19
AT1G07510.1	100	100
AT1G07520.1	100	97.92
AT1G07530.1	20	18.82
AT1G07590.1	100	100
AT1G07610.1	13.41	14.67
AT1G07615.1	100	100
AT1G07630.1	91.03	89.87
AT1G07640.1	99.17	99.17
AT1G07640.2	99.17	99.17
AT1G07640.3	99.17	99.17
AT1G07660.1	62.5	62.5
AT1G07660.2	62.5	62.5
AT1G07670.1	91.67	91.67
AT1G07750.1	75	73.08
AT1G07770.1	70.69	64.06
AT1G07770.2	70.69	64.06
AT1G07780.1	93.59	93.59
AT1G07780.2	93.59	93.59
AT1G07780.3	93.59	93.59
AT1G07780.4	56.38	57.53
AT1G07780.5	48.98	48
AT1G07790.1	92.65	91.3
AT1G07810.1	73.77	72.58
AT1G07820.1	4.76	4.69
AT1G07820.2	0	0
AT1G07830.1	98.92	96.84
AT1G07840.1	15.12	15.29
AT1G07840.2	15.12	15.29
AT1G07840.3	35.25	32.67
AT1G07870.1	43.66	43.06
AT1G07870.2	100	100
AT1G07880.1	66.84	65.83
AT1G07880.2	100	97.87
AT1G07890.1	16.67	17.14
AT1G07890.2	16.67	17.14
AT1G07890.3	16.67	17.14
AT1G07890.4	16.67	17.14
AT1G07890.5	16.67	17.14
AT1G07890.6	28.7	30.39
AT1G07890.7	16.67	17.14
AT1G07890.8	16.67	17.14
AT1G07920.1	57.78	58.43
AT1G07930.1	83.04	85.32
AT1G07930.2	83.04	85.32
AT1G07940.1	89.47	90.15
AT1G07940.2	89.47	90.15
AT1G07950.1	58.89	62.35
AT1G07960.1	6.73	7.22
AT1G07960.2	6.73	7.37
AT1G07960.3	15.45	17.35
AT1G07980.1	99.08	95.58
AT1G07990.1	19.7	17.81
AT1G08000.1	98.75	98.75
AT1G08000.2	98.75	98.75
AT1G08010.1	50	51.52
AT1G08030.1	100	100
AT1G08040.1	100	100
AT1G08040.2	100	100
AT1G08090.1	100	100
AT1G08110.1	47.92	51.11
AT1G08110.2	47.92	51.11
AT1G08110.3	47.92	51.11
AT1G08110.4	95.7	98.89
AT1G08125.1	100	100
AT1G08125.2	100	100
AT1G08125.3	100	100
AT1G08130.1	51.61	53.33
AT1G08160.1	97.73	97.73
AT1G08180.1	90.91	85.11
AT1G08190.1	59.09	61.9
AT1G08200.1	14.63	14.06
AT1G08290.1	95.47	95.87
AT1G08315.1	73.91	69.39
AT1G08320.1	89.86	83.78
AT1G08320.2	89.86	83.78
AT1G08320.3	89.86	83.78
AT1G08340.1	90.48	86.36
AT1G08360.1	85.29	85.29
AT1G08370.1	77.36	75.93
AT1G08380.1	100	100
AT1G08410.1	70.79	68.89
AT1G08420.1	89.14	89.14
AT1G08420.2	85.34	88.11
AT1G08450.1	14.29	14.55
AT1G08450.2	42.86	52.17
AT1G08450.3	80	76.19
AT1G08460.1	95.83	93.88
AT1G08470.1	100	100
AT1G08480.1	43.66	44.44
AT1G08510.1	87.86	85.42
AT1G08520.1	77.78	74.47
AT1G08530.1	100	100
AT1G08540.1	100	100
AT1G08550.1	100	100
AT1G08550.2	100	100
AT1G08560.1	100	100
AT1G08570.1	47.68	48.65
AT1G08570.2	47.68	48.65
AT1G08570.3	50.68	49.67
AT1G08570.4	50.68	49.67
AT1G08580.1	100	98.7
AT1G08590.1	89.29	91.46
AT1G08600.1	85.71	90
AT1G08600.2	85.71	90
AT1G08600.3	85.71	90
AT1G08600.4	85.71	90
AT1G08620.1	21.36	20
AT1G08620.2	89.57	88.79
AT1G08640.1	42.45	42.2
AT1G08650.1	36.42	37.82
AT1G08650.2	97.53	98.75
AT1G08660.1	100	100
AT1G08660.2	74.4	73.53
AT1G08680.1	23.81	22.96
AT1G08680.2	23.81	22.96
AT1G08680.3	21.16	20.1
AT1G08680.4	40	41.27
AT1G08700.1	100	100
AT1G08710.1	21.74	21.74
AT1G08710.2	100	100
AT1G08720.1	100	100
AT1G08760.1	100	100
AT1G08780.1	100	100
AT1G08800.1	30.77	32
AT1G08800.2	30.77	32
AT1G08820.1	98.84	98.82
AT1G08820.2	98.84	98.82
AT1G08830.1	15.58	14.81
AT1G08830.2	15.58	14.81
AT1G08880.1	62.9	60
AT1G08890.1	42.5	41.98
AT1G08930.1	52	48.75
AT1G08930.2	65.28	68.12
AT1G08940.1	100	100
AT1G08970.1	100	100
AT1G08970.2	100	100
AT1G08970.3	54.17	54.17
AT1G08970.4	100	100
AT1G08990.1	100	100
AT1G09000.1	85.48	85.48
AT1G09010.1	93.1	100
AT1G09020.1	20.75	18.97
AT1G09060.1	100	100
AT1G09060.2	100	100
AT1G09060.3	100	100
AT1G09070.1	85.9	82.72
AT1G09100.1	100	100
AT1G09130.1	59.41	62.5
AT1G09130.2	100	100
AT1G09130.3	52.17	55.81
AT1G09140.1	94.64	98.15
AT1G09140.2	53.22	53.45
AT1G09150.1	100	100
AT1G09160.1	19.42	20.45
AT1G09160.2	51.79	52.73
AT1G09200.1	100	100
AT1G09210.1	90	88.52
AT1G09250.1	100	100
AT1G09270.1	38.64	38.64
AT1G09270.2	100	100
AT1G09270.3	38.64	38.64
AT1G09280.1	100	100
AT1G09290.1	25.45	26.92
AT1G09300.2	77.78	75
AT1G09310.1	48.57	45.95
AT1G09320.1	80.7	83.64
AT1G09330.1	74.67	73.68
AT1G09415.1	36.96	35.42
AT1G09430.1	93.43	94.85
AT1G09460.1	85.39	85.39
AT1G09470.1	35.42	37.78
AT1G09470.2	97.83	100
AT1G09560.1	100	100
AT1G09570.1	68.06	70
AT1G09570.2	68.06	70
AT1G09575.1	81.13	76.79
AT1G09580.1	100	100
AT1G09590.1	100	100
AT1G09620.1	63	63
AT1G09630.1	100	100
AT1G09640.1	94.92	97.39
AT1G09640.2	17.86	18.87
AT1G09645.1	92.54	98.41
AT1G09660.1	48.19	45.45
AT1G09660.2	94.81	95.52
AT1G09690.1	96.88	96.88
AT1G09700.1	27.42	26.15
AT1G09730.1	91.74	91.67
AT1G09730.2	98.35	97.52
AT1G09740.1	97.56	96.39
AT1G09750.1	92.31	90.57
AT1G09760.1	59.29	56.3
AT1G09770.1	26.58	27.63
AT1G09780.1	26.23	26.23
AT1G09794.1	81.08	81.08
AT1G09815.1	19.05	18.18
AT1G09830.1	100	100
AT1G09840.1	100	100
AT1G09840.2	100	100
AT1G09840.3	100	100
AT1G09840.4	100	100
AT1G09840.5	42.7	43.68
AT1G09840.6	42.7	43.68
AT1G09850.1	100	100
AT1G09870.1	39.47	36.59
AT1G09910.1	100	100
AT1G09920.1	39.62	38.18
AT1G09932.1	87.5	89.74
AT1G09932.2	87.5	89.74
AT1G09940.1	97.3	96
AT1G09970.1	30	31.4
AT1G09970.2	18.92	18.42
AT1G10020.1	21.88	23.53
AT1G10040.1	43.28	42.03
AT1G10040.2	58.46	55.07
AT1G10050.1	100	100
AT1G10070.1	84.27	83.33
AT1G10070.2	84.27	83.33
AT1G10070.3	84.27	83.33
AT1G10120.1	38.33	39.66
AT1G10130.1	77.33	73.42
AT1G10140.1	10.87	11.9
AT1G10150.1	98.51	100
AT1G10170.1	62.96	62.39
AT1G10180.1	100	100
AT1G10200.1	93.68	95.7
AT1G10230.1	90	88.52
AT1G10270.1	96.97	100
AT1G10290.1	89.38	90.18
AT1G10310.1	11.11	11.11
AT1G10340.1	100	100
AT1G10340.2	100	100
AT1G10350.1	89.66	88.14
AT1G10380.1	100	100
AT1G10390.1	62.67	62.16
AT1G10390.2	62.67	62.16
AT1G10400.1	100	100
AT1G10410.1	59.52	59.52
AT1G10430.1	64.38	68.12
AT1G10450.1	57.89	56.12
AT1G10470.1	96.39	94.12
AT1G10480.1	97.95	98.62
AT1G10490.1	92.66	90.58
AT1G10500.1	74	74
AT1G10530.1	81.98	81.25
AT1G10550.1	100	100
AT1G10580.1	86.59	88.75
AT1G10590.1	50	49.47
AT1G10590.2	44.57	48.81
AT1G10590.3	44.57	48.81
AT1G10610.1	47.56	44.83
AT1G10630.1	100	100
AT1G10650.1	60.71	62.96
AT1G10650.2	60.71	62.96
AT1G10660.1	44.23	42.2
AT1G10670.1	100	100
AT1G10670.2	100	100
AT1G10670.3	100	100
AT1G10670.4	53.73	59.02
AT1G10700.1	100	100
AT1G10720.1	90.2	93.88
AT1G10740.4	100	100
AT1G10760.1	100	94.34
AT1G10820.1	83.53	84.52
AT1G10820.2	83.53	84.52
AT1G10840.1	70.73	70.73
AT1G10840.2	70.73	70.73
AT1G10850.1	67.42	65.93
AT1G10865.1	0	0
AT1G10865.2	56	58.33
AT1G10870.1	92.22	94.32
AT1G10890.1	95.59	94.2
AT1G10900.1	100	100
AT1G10940.1	85.56	86.52
AT1G10940.2	56.79	57.5
AT1G10950.1	93.55	95.87
AT1G11000.1	81.97	83.33
AT1G11020.1	51.67	54.39
AT1G11050.1	93.28	93.98
AT1G11080.1	68.75	69.84
AT1G11080.2	100	100
AT1G11170.1	95.45	94.03
AT1G11170.2	66.84	67.88
AT1G11210.1	73.85	80
AT1G11220.1	100	100
AT1G11240.1	100	100
AT1G11260.1	89.86	87.32
AT1G11280.1	100	100
AT1G11280.2	100	100
AT1G11280.3	100	100
AT1G11280.4	100	100
AT1G11310.1	48.15	48.15
AT1G11310.2	65.37	65.05
AT1G11360.1	83.78	82.3
AT1G11360.2	60.87	59.83
AT1G11360.3	82.58	78.05
AT1G11360.4	78.95	76.92
AT1G11380.1	75.61	78.48
AT1G11400.1	38.89	35
AT1G11400.2	38.89	35
AT1G11400.3	38.89	35
AT1G11430.1	37.14	36.62
AT1G11440.1	89.58	91.49
AT1G11450.1	100	100
AT1G11450.2	100	100
AT1G11475.1	10	10
AT1G11480.1	46.97	46.97
AT1G11480.2	46.97	46.97
AT1G11530.1	39.66	41.07
AT1G11540.1	100	100
AT1G11545.1	100	100
AT1G11580.1	76.47	76.47
AT1G11650.1	38.89	37.72
AT1G11650.2	5.48	5.41
AT1G11660.1	50	48.44
AT1G11670.1	92.68	93.44
AT1G11680.1	57.14	58.33
AT1G11750.1	100	100
AT1G11750.2	100	100
AT1G11760.1	95.28	97.12
AT1G11840.1	30.39	29.25
AT1G11840.2	30.39	29.25
AT1G11840.3	68.04	64.71
AT1G11840.4	68.04	64.71
AT1G11840.5	84.72	83.56
AT1G11840.6	98.35	97.54
AT1G11860.1	48.15	42.62
AT1G11860.2	48.15	42.62
AT1G11860.3	100	100
AT1G11890.1	100	100
AT1G11905.1	89.11	89.11
AT1G11910.1	94.44	95.33
AT1G11930.1	19.74	18.99
AT1G11930.2	97.92	96.91
AT1G11960.1	100	100
AT1G12000.1	85	88.31
AT1G12010.1	54.43	56.58
AT1G12020.1	86	79.63
AT1G12040.1	85.45	87.04
AT1G12050.1	8.22	8
AT1G12080.1	57.14	59.57
AT1G12080.2	51.92	54
AT1G12090.1	42.11	42.11
AT1G12110.1	28.4	28.75
AT1G12120.1	9.26	10.64
AT1G12140.1	19.48	19.65
AT1G12140.2	34.55	38.78
AT1G12160.1	97.33	98.65
AT1G12200.1	56.06	57.81
AT1G12230.1	53	51.96
AT1G12230.2	59.83	58.82
AT1G12240.1	100	100
AT1G12270.1	19.64	17.74
AT1G12310.1	80.19	77.27
AT1G12320.1	13.04	13.04
AT1G12360.1	48.68	46.25
AT1G12390.1	68.42	72.22
AT1G12400.1	35	37.84
AT1G12410.1	91.67	83.02
AT1G12420.1	88.18	88.99
AT1G12430.1	83.53	82.56
AT1G12430.2	83.53	82.56
AT1G12440.1	53.23	48.53
AT1G12440.2	53.23	48.53
AT1G12470.1	67.21	68.33
AT1G12500.1	41.73	40.85
AT1G12520.1	100	100
AT1G12520.2	100	100
AT1G12520.3	100	100
AT1G12530.1	100	100
AT1G12580.1	12.5	12.2
AT1G12650.1	25.45	25.45
AT1G12650.2	25.45	25.45
AT1G12650.3	25.45	25.45
AT1G12650.4	20.79	21
AT1G12680.1	97.1	97.1
AT1G12750.1	72.41	84
AT1G12750.2	72.41	84
AT1G12750.3	72.41	84
AT1G12760.1	39.02	41.38
AT1G12760.2	39.02	41.38
AT1G12770.1	97.67	97.67
AT1G12780.1	40	47.46
AT1G12810.1	93.64	93.64
AT1G12810.2	93.14	93.14
AT1G12820.1	91.43	94.12
AT1G12830.1	100	100
AT1G12840.1	100	100
AT1G12850.1	5.62	5.32
AT1G12880.1	100	100
AT1G12910.1	79.45	84.06
AT1G12920.1	100	98.46
AT1G12930.1	38.1	36.36
AT1G12970.1	100	100
AT1G13000.1	86.36	80
AT1G13000.2	86.36	80
AT1G13020.1	91.06	90.32
AT1G13030.1	93.83	91.57
AT1G13060.1	100	95.24
AT1G13060.2	100	95.31
AT1G13090.1	100	100
AT1G13110.1	64.41	65.52
AT1G13120.1	100	100
AT1G13160.1	13.73	11.67
AT1G13170.1	71.43	76.27
AT1G13170.2	93.33	91.3
AT1G13190.1	38.1	39.02
AT1G13210.1	77.27	73.12
AT1G13220.1	100	100
AT1G13220.2	90.91	92.31
AT1G13245.1	18.9	20.69
AT1G13250.1	52.83	51.38
AT1G13260.1	38.89	36.84
AT1G13280.1	95.15	97.03
AT1G13300.1	100	100
AT1G13320.1	20.83	21.13
AT1G13320.2	59.35	58.87
AT1G13320.3	97.22	97.22
AT1G13340.1	100	100
AT1G13350.1	100	100
AT1G13350.2	100	100
AT1G13360.1	54.76	49.46
AT1G13360.2	100	100
AT1G13360.3	100	100
AT1G13380.1	100	100
AT1G13390.2	51.46	49.53
AT1G13420.1	84.62	85.94
AT1G13430.1	100	100
AT1G13440.1	7.78	8.75
AT1G13440.2	7.78	8.75
AT1G13450.1	82.35	82.35
AT1G13450.2	82.35	82.35
AT1G13450.3	61.07	59.93
AT1G13460.1	100	100
AT1G13460.2	100	100
AT1G13480.1	44.68	45.65
AT1G13520.1	100	100
AT1G13560.1	98.17	96.4
AT1G13560.2	98.17	96.4
AT1G13590.1	97.22	97.22
AT1G13620.1	63.16	64
AT1G13640.1	75.61	78.48
AT1G13670.1	31.03	34.62
AT1G13690.1	53.09	57.33
AT1G13730.1	64	67.61
AT1G13740.1	41.25	44
AT1G13830.1	100	100
AT1G13870.1	50	53.7
AT1G13880.1	57.5	54.76
AT1G13900.1	57.5	56.1
AT1G13930.1	92.73	96.23
AT1G13930.2	0	0
AT1G13930.3	46.91	46.34
AT1G13950.1	46.3	48.08
AT1G13960.1	80	81.36
AT1G13960.2	17.76	18.45
AT1G13970.1	14.04	13.11
AT1G13980.1	73.56	71.91
AT1G13980.2	100	100
AT1G13990.1	60.98	60.98
AT1G13990.2	82.93	85
AT1G14000.1	74.63	69.44
AT1G14010.1	54.1	54.1
AT1G14060.1	11.29	11.11
AT1G14120.1	100	100
AT1G14140.1	50	52.7
AT1G14160.1	62.5	60.61
AT1G14170.1	93.83	95
AT1G14170.2	93.83	95
AT1G14170.3	93.83	95
AT1G14200.1	97.83	97.83
AT1G14210.1	0	0
AT1G14230.1	100	100
AT1G14290.1	86.67	91.55
AT1G14300.1	46.25	46.84
AT1G14300.2	46.25	46.84
AT1G14320.1	93.67	91.36
AT1G14320.2	93.67	91.36
AT1G14330.1	78.82	77.01
AT1G14340.1	96.36	92.98
AT1G14350.1	51.19	49.71
AT1G14350.2	93.57	94.93
AT1G14360.1	72.15	68.67
AT1G14380.1	86.75	86.75
AT1G14380.2	86.75	86.75
AT1G14380.3	86.75	86.75
AT1G14400.1	97.5	96.3
AT1G14400.2	97.5	96.3
AT1G14450.1	86.87	87.76
AT1G14510.1	85.86	90.43
AT1G14570.1	100	100
AT1G14570.2	100	100
AT1G14570.3	100	100
AT1G14570.4	100	100
AT1G14610.1	24.14	25.93
AT1G14620.1	95.08	96.67
AT1G14620.2	95.83	97.18
AT1G14630.1	100	100
AT1G14650.1	43.9	44.44
AT1G14650.2	60.47	60.47
AT1G14670.1	32.08	34
AT1G14685.1	60.16	62.71
AT1G14685.2	60.16	62.71
AT1G14685.3	60.16	62.71
AT1G14690.1	93.97	94.74
AT1G14690.2	93.97	94.74
AT1G14710.1	80.21	80.21
AT1G14710.2	80.21	80.21
AT1G14720.1	52.94	49.09
AT1G14730.1	100	100
AT1G14740.1	22.06	21.74
AT1G14810.1	32.91	32.91
AT1G14830.1	97.65	100
AT1G14870.1	49.25	49.25
AT1G14890.1	60.67	57.45
AT1G14900.1	100	100
AT1G14910.1	49.23	47.76
AT1G14980.1	48	46.6
AT1G15000.1	33.33	34.15
AT1G15020.1	100	100
AT1G15020.2	100	100
AT1G15040.1	48.94	52.27
AT1G15040.2	47.66	48.41
AT1G15060.1	71.05	73.97
AT1G15100.1	100	100
AT1G15110.1	30.23	30.95
AT1G15110.2	100	100
AT1G15120.1	41	43.62
AT1G15120.2	55.56	62.5
AT1G15130.1	96.1	100
AT1G15200.1	100	100
AT1G15200.2	100	100
AT1G15200.3	100	100
AT1G15200.4	100	100
AT1G15210.1	80.6	77.14
AT1G15230.1	85.39	83.06
AT1G15250.1	100	100
AT1G15270.1	98.21	100
AT1G15280.1	97.08	91.1
AT1G15280.2	97.08	91.1
AT1G15290.1	87.5	88.42
AT1G15310.1	100	100
AT1G15340.1	27.69	26.47
AT1G15340.2	27.69	26.47
AT1G15350.1	100	100
AT1G15350.2	100	100
AT1G15350.3	47.06	41.38
AT1G15370.1	100	95.45
AT1G15380.1	95.06	93.9
AT1G15380.2	95.06	93.9
AT1G15390.1	68.97	71.43
AT1G15400.1	89.23	90.62
AT1G15400.2	16.98	18.37
AT1G15400.3	100	100
AT1G15420.1	100	98.28
AT1G15430.1	47.14	49.25
AT1G15440.1	100	96.55
AT1G15470.1	16.67	18.37
AT1G15480.1	5.88	6
AT1G15500.1	100	100
AT1G15550.1	100	100
AT1G15570.1	78.45	82.73
AT1G15660.1	72.73	72.73
AT1G15670.1	30.39	30.39
AT1G15690.1	26.85	27.62
AT1G15690.2	88.07	89.08
AT1G15700.1	100	100
AT1G15710.1	100	100
AT1G15720.1	100	100
AT1G15740.1	28.21	27.73
AT1G15750.1	85	85
AT1G15750.2	85	85
AT1G15750.3	85	85
AT1G15750.4	85	85
AT1G15780.1	32.18	33.73
AT1G15810.1	84.04	86.81
AT1G15820.1	100	100
AT1G15860.1	61.36	62.35
AT1G15860.2	61.36	62.35
AT1G15860.3	61.36	62.35
AT1G15880.1	64.71	55
AT1G15910.1	72.79	74.44
AT1G15920.2	75.44	78.18
AT1G15930.1	13.58	14.1
AT1G15930.2	13.58	14.1
AT1G15940.1	13.11	11.94
AT1G15950.1	93.83	93.83
AT1G15950.2	94.67	100
AT1G15970.1	64.47	64.47
AT1G16000.1	67.19	67.19
AT1G16010.1	100	100
AT1G16010.2	100	100
AT1G16010.3	100	100
AT1G16040.1	69.23	73.47
AT1G16060.1	100	100
AT1G16060.2	100	100
AT1G16170.1	40.48	40.48
AT1G16180.1	100	100
AT1G16180.2	100	100
AT1G16190.1	83.64	83.64
AT1G16210.1	26.15	26.56
AT1G16240.1	82.35	80.39
AT1G16240.2	82.35	80.39
AT1G16240.3	32	27.27
AT1G16270.1	79.41	77.14
AT1G16270.2	79.41	77.14
AT1G16300.1	62.32	57.33
AT1G16340.1	10.64	11.63
AT1G16340.2	21.13	21.43
AT1G16340.3	10.64	11.63
AT1G16340.4	81.94	79.73
AT1G16350.1	100	92.68
AT1G16400.1	0	0
AT1G16460.1	7.06	6.9
AT1G16460.2	36.76	39.68
AT1G16460.3	7.06	6.9
AT1G16460.4	7.06	6.9
AT1G16470.1	80.95	77.27
AT1G16470.2	80.95	77.27
AT1G16520.1	100	100
AT1G16530.1	100	100
AT1G16560.1	54.39	56.88
AT1G16560.2	54.39	56.88
AT1G16560.3	54.39	56.88
AT1G16560.4	54.39	56.88
AT1G16610.1	100	100
AT1G16610.2	42.11	44.44
AT1G16610.3	0	0
AT1G16630.1	100	100
AT1G16670.1	99.02	99.02
AT1G16680.1	85.37	81.4
AT1G16700.1	77.61	78.79
AT1G16740.1	100	100
AT1G16810.1	0	0
AT1G16810.2	0	0
AT1G16840.1	83.91	82.02
AT1G16840.2	61.47	62.56
AT1G16840.3	32.98	34.07
AT1G16840.4	61.15	61.15
AT1G16858.1	48.53	47.65
AT1G16860.1	65.89	65.38
AT1G16870.1	60.76	63.16
AT1G16880.1	61.11	46.81
AT1G16890.1	7.14	6.67
AT1G16890.2	63.75	62.96
AT1G16890.3	57.27	55.75
AT1G16916.1	95.24	92.31
AT1G16920.1	100	100
AT1G17060.1	68.97	68.97
AT1G17070.1	96.97	100
AT1G17080.1	94.64	94.64
AT1G17110.1	100	100
AT1G17110.2	100	100
AT1G17130.1	98.7	98.7
AT1G17130.2	98.7	98.7
AT1G17140.1	100	98.11
AT1G17140.2	100	98.11
AT1G17145.1	0	0
AT1G17160.1	71.79	71.79
AT1G17160.2	100	100
AT1G17170.1	100	100
AT1G17190.1	98	98
AT1G17210.1	49.19	49.59
AT1G17220.1	40.78	41.18
AT1G17280.1	94.05	95.18
AT1G17280.2	93.24	94.52
AT1G17290.1	47.52	46.6
AT1G17330.1	78.21	80.26
AT1G17340.1	46.34	50
AT1G17350.1	100	100
AT1G17360.1	100	100
AT1G17370.1	68.35	67.5
AT1G17370.2	68.35	67.5
AT1G17380.1	84.21	85.71
AT1G17430.1	100	100
AT1G17440.1	88.7	89.47
AT1G17440.2	100	100
AT1G17455.1	78.46	72.86
AT1G17455.2	78.46	72.86
AT1G17470.1	58.97	60.53
AT1G17470.2	58.97	60.53
AT1G17490.1	88.16	90.54
AT1G17500.1	95	95
AT1G17510.1	47.46	48.28
AT1G17520.1	26.67	25.69
AT1G17530.1	35.53	38.03
AT1G17550.1	91.53	91.53
AT1G17580.1	17.07	18.18
AT1G17620.1	80.36	78.95
AT1G17665.1	100	100
AT1G17680.1	54.39	54.39
AT1G17680.2	54.39	54.39
AT1G17690.1	15.79	15.79
AT1G17720.1	21.97	21.4
AT1G17720.2	21.97	21.4
AT1G17730.1	8.16	8.7
AT1G17745.1	38.24	39.8
AT1G17745.2	62.5	59.14
AT1G17760.1	100	87.5
AT1G17780.2	100	100
AT1G17820.1	46.03	42.65
AT1G17860.1	37.93	40.74
AT1G17880.1	0	0
AT1G17890.1	52.54	46.97
AT1G17890.2	100	100
AT1G17890.3	100	100
AT1G17930.1	63.5	61.7
AT1G17980.1	45.33	47.89
AT1G17980.2	46.58	47.89
AT1G18030.1	58.06	54
AT1G18030.2	68.21	70.55
AT1G18060.1	50	49.02
AT1G18070.1	89.92	84.06
AT1G18070.2	73.44	71.21
AT1G18070.3	99.15	97.48
AT1G18080.1	92.31	93.75
AT1G18150.1	85.53	82.28
AT1G18150.2	85.53	82.28
AT1G18150.3	87.83	86.32
AT1G18160.1	31.67	31.15
AT1G18190.1	100	100
AT1G18210.1	64.21	66.67
AT1G18210.2	45.16	50
AT1G18250.1	19.23	21.13
AT1G18250.2	19.23	21.74
AT1G18260.1	100	100
AT1G18270.1	33.78	40.32
AT1G18270.2	33.78	40.32
AT1G18270.3	28.38	34.43
AT1G18300.1	40.66	39.78
AT1G18370.1	100	100
AT1G18450.1	81.25	78.79
AT1G18470.1	56.04	56.04
AT1G18470.2	65	65.36
AT1G18480.1	52.54	52.54
AT1G18490.1	84.38	83.08
AT1G18500.1	0	0
AT1G18540.1	0	0
AT1G18570.1	98.75	98.75
AT1G18580.1	36.49	36.49
AT1G18590.1	86.67	88.64
AT1G18630.1	100	98.18
AT1G18660.1	68.93	73.96
AT1G18660.2	68.93	73.96
AT1G18660.3	68.93	73.96
AT1G18660.4	52.34	52.76
AT1G18670.1	98.17	98.17
AT1G18700.1	100	100
AT1G18700.2	100	100
AT1G18700.4	100	100
AT1G18720.1	100	100
AT1G18740.1	27.12	25
AT1G18800.1	90.83	91.6
AT1G18840.1	80.3	79.1
AT1G18840.2	80.3	79.1
AT1G18850.1	94.87	100
AT1G18860.1	NA	NA
AT1G18880.1	91.18	86.11
AT1G18890.1	57.47	56.44
AT1G18950.1	80.56	80.56
AT1G18970.1	100	100
AT1G19000.1	79.67	79.03
AT1G19000.2	40.88	42.29
AT1G19010.1	81.82	84.91
AT1G19010.2	81.82	84.91
AT1G19020.1	93.22	88.71
AT1G19050.1	100	100
AT1G19080.1	33.33	31.75
AT1G19080.2	33.33	31.75
AT1G19110.1	100	100
AT1G19120.1	24.24	23.53
AT1G19130.1	88.89	88.89
AT1G19180.1	51.72	54.05
AT1G19180.2	51.72	54.05
AT1G19220.1	34.58	34.91
AT1G19240.1	87.38	84.91
AT1G19300.1	100	100
AT1G19310.1	23.73	22.58
AT1G19350.1	40.74	42.31
AT1G19350.3	28.21	25.29
AT1G19350.4	28.21	25.29
AT1G19350.5	28.21	25.29
AT1G19350.6	19.28	20
AT1G19360.1	13.56	15.38
AT1G19370.1	97.5	100
AT1G19396.1	22.73	22.73
AT1G19396.3	22.73	22.73
AT1G19397.1	7.5	7.44
AT1G19400.1	33.33	34.48
AT1G19400.2	33.33	34.48
AT1G19430.1	100	100
AT1G19440.1	79.79	80.65
AT1G19485.1	100	100
AT1G19485.2	100	100
AT1G19520.1	100	100
AT1G19520.2	100	100
AT1G19530.1	81.91	79.38
AT1G19570.1	67.35	70.21
AT1G19570.2	32.65	36.36
AT1G19580.1	21.31	21.49
AT1G19580.2	92.71	91.75
AT1G19600.1	69.51	71.25
AT1G19660.1	94.06	95
AT1G19660.2	94.06	95
AT1G19690.1	72.31	70.15
AT1G19700.1	100	97.3
AT1G19700.2	53.03	51.47
AT1G19700.3	98.68	98.68
AT1G19710.1	100	100
AT1G19730.1	69.07	67.68
AT1G19740.1	50.65	49.37
AT1G19770.1	86.36	82.61
AT1G19800.1	78.43	81.63
AT1G19800.2	0	0
AT1G19800.3	0	0
AT1G19835.1	100	98.88
AT1G19835.2	100	98.88
AT1G19870.1	21.67	20.47
AT1G19880.1	25.37	25.76
AT1G19910.1	61.11	64.71
AT1G19920.1	40.3	42.86
AT1G19950.1	67.19	72.88
AT1G19990.1	100	100
AT1G20010.1	56.34	51.95
AT1G20050.1	64.41	67.86
AT1G20090.1	10.78	10.19
AT1G20100.1	100	98.48
AT1G20100.2	100	100
AT1G20110.1	36.99	37.5
AT1G20140.1	95.16	98.33
AT1G20160.1	76.92	76.92
AT1G20160.2	16.67	18.75
AT1G20190.1	91.25	89.02
AT1G20200.1	95.16	98.33
AT1G20220.1	85.19	82.14
AT1G20225.1	48.39	52.63
AT1G20260.1	97.96	96.97
AT1G20270.1	95.54	95.54
AT1G20300.1	7.04	7.25
AT1G20330.1	43.56	43.14
AT1G20340.1	80.83	78.23
AT1G20370.1	57.3	54.84
AT1G20410.1	44.44	44.44
AT1G20430.1	31.03	29.67
AT1G20440.1	91.09	89.32
AT1G20450.1	79.27	82.28
AT1G20450.2	79.27	82.28
AT1G20510.1	96.77	96.77
AT1G20510.2	62.18	60.62
AT1G20560.1	100	98.8
AT1G20560.2	100	98.8
AT1G20575.1	87.3	88.71
AT1G20580.1	72.73	75.29
AT1G20610.1	53.26	53.26
AT1G20620.1	41.75	39.81
AT1G20620.2	57.21	56.93
AT1G20620.4	41.75	39.81
AT1G20620.5	100	98.75
AT1G20630.1	99.15	97.48
AT1G20670.1	51.35	48.72
AT1G20693.1	57.66	54.7
AT1G20693.2	57.66	54.7
AT1G20693.3	57.66	54.7
AT1G20696.1	64.22	67.31
AT1G20696.2	60.61	63.83
AT1G20696.3	65.45	67.29
AT1G20700.1	78.05	78.05
AT1G20760.1	7.81	7.69
AT1G20770.1	89.9	93.68
AT1G20840.1	50	46.88
AT1G20850.1	7.41	7.27
AT1G20900.1	100	100
AT1G20920.1	37.31	37.45
AT1G20920.2	37.31	37.45
AT1G20930.1	77.36	83.67
AT1G20950.1	94.37	93.06
AT1G20960.1	100	100
AT1G20960.2	6.76	7.25
AT1G20970.1	79.59	77.23
AT1G20980.1	72.08	72.08
AT1G21000.1	78.63	78.63
AT1G21000.2	86.51	87.2
AT1G21050.1	100	100
AT1G21065.1	100	97.78
AT1G21080.1	0	0
AT1G21080.2	78.08	80.28
AT1G21080.3	73.63	73.63
AT1G21090.1	86.21	84.75
AT1G21100.1	100	100
AT1G21110.1	100	100
AT1G21120.1	97.22	100
AT1G21130.1	100	100
AT1G21130.2	80	80.56
AT1G21140.1	32.35	30.99
AT1G21160.1	100	100
AT1G21170.1	37.31	36.76
AT1G21190.1	67.92	69.9
AT1G21200.1	95.37	94.5
AT1G21310.1	29.91	27.12
AT1G21370.1	36.99	37.5
AT1G21370.2	36.99	37.5
AT1G21380.1	78.95	80.36
AT1G21390.1	100	100
AT1G21440.1	95.83	97.87
AT1G21450.1	43.69	42.45
AT1G21560.1	29.73	28.95
AT1G21560.2	65.85	64.29
AT1G21560.3	65.85	64.29
AT1G21580.1	48.37	47.09
AT1G21600.1	41.41	39.05
AT1G21600.2	51.28	50.63
AT1G21610.1	34	34.34
AT1G21610.2	34	34.34
AT1G21610.3	34	34.34
AT1G21630.1	25.45	24.78
AT1G21630.2	0	0
AT1G21640.1	65.15	64.18
AT1G21640.2	4.55	4.35
AT1G21660.1	75.36	69.33
AT1G21680.1	29.41	29.85
AT1G21700.1	100	100
AT1G21710.1	71.43	69.62
AT1G21720.1	7.14	6.78
AT1G21730.1	58.18	58.72
AT1G21750.1	55.88	54.81
AT1G21760.1	76.47	69.33
AT1G21770.1	51.85	50
AT1G21780.1	90.24	88.1
AT1G21780.2	90.24	88.1
AT1G21790.1	87.5	83.05
AT1G21830.1	98.11	98.11
AT1G21880.1	100	100
AT1G21880.2	100	100
AT1G21900.1	33.33	33.9
AT1G21910.1	99.14	99.14
AT1G21920.1	100	100
AT1G21930.1	61.22	62.5
AT1G21980.1	39.05	43.62
AT1G22030.1	100	100
AT1G22060.1	54.74	54.17
AT1G22065.1	86.67	82.11
AT1G22070.1	54.74	54.17
AT1G22190.1	29.03	30.34
AT1G22200.1	0	0
AT1G22200.2	28.26	27.46
AT1G22220.1	100	100
AT1G22230.1	26.09	23.08
AT1G22270.1	51.35	50.67
AT1G22280.1	70.68	71.21
AT1G22280.2	37.07	37.55
AT1G22280.3	28.07	29.09
AT1G22300.1	24.79	23.39
AT1G22300.2	46.67	45.65
AT1G22300.3	78.15	77.5
AT1G22310.1	100	100
AT1G22310.2	100	100
AT1G22330.1	100	100
AT1G22360.1	98.21	100
AT1G22360.2	98.21	100
AT1G22410.1	85.23	86.21
AT1G22440.1	100	100
AT1G22450.1	19.44	20
AT1G22470.1	100	100
AT1G22500.1	94.55	94.55
AT1G22520.1	78.82	77.91
AT1G22530.1	100	100
AT1G22620.1	62.32	63.24
AT1G22640.1	100	100
AT1G22700.2	92.45	90.74
AT1G22710.1	38.96	35.29
AT1G22730.1	62.67	62.67
AT1G22740.1	39.71	40.91
AT1G22780.1	71.15	69.81
AT1G22790.1	81.32	83.15
AT1G22790.2	81.32	83.15
AT1G22800.1	80.19	80.19
AT1G22840.1	97.78	96.7
AT1G22840.2	93.94	92.08
AT1G22882.1	8.33	7.89
AT1G22885.1	9.33	8.14
AT1G22885.2	100	100
AT1G22910.1	40.38	41.45
AT1G22910.2	42.14	40.61
AT1G22910.3	15.87	17.54
AT1G22920.1	31.48	32.08
AT1G22930.1	30.38	27.59
AT1G22930.2	30.38	27.59
AT1G22950.1	23.86	23.86
AT1G22990.1	100	94.12
AT1G23020.1	100	92.86
AT1G23020.2	100	93.94
AT1G23030.1	100	100
AT1G23040.1	98.53	97.81
AT1G23080.1	36.21	38.18
AT1G23080.2	82.91	84.1
AT1G23080.3	36.21	38.18
AT1G23100.1	100	100
AT1G23120.1	69.84	70.97
AT1G23149.1	45.78	45.37
AT1G23150.1	100	100
AT1G23190.1	27.71	28.4
AT1G23205.1	100	100
AT1G23220.1	98.72	98.72
AT1G23260.1	31.34	30.43
AT1G23290.1	64.58	72.09
AT1G23310.1	92.47	94.51
AT1G23310.2	89.76	90.48
AT1G23330.1	19.15	19.78
AT1G23380.1	100	100
AT1G23380.2	100	100
AT1G23390.1	36.04	35.4
AT1G23400.1	100	100
AT1G23410.1	100	100
AT1G23440.1	34.72	35.71
AT1G23490.1	79	78.22
AT1G23530.1	95.59	97.01
AT1G23560.1	83.64	76.67
AT1G23710.1	98.39	98.39
AT1G23720.1	10	11.11
AT1G23750.1	10.42	10.75
AT1G23780.1	100	99.12
AT1G23800.1	100	100
AT1G23820.1	97.56	96.39
AT1G23820.2	43.44	41.73
AT1G23850.1	0	0
AT1G23860.1	14.22	13.49
AT1G23860.2	29.7	29.56
AT1G23860.3	33.82	32.39
AT1G23860.4	28.99	28.04
AT1G23870.1	100	100
AT1G23900.1	71.17	70.54
AT1G23900.2	71.17	70.54
AT1G23950.1	57.61	57.92
AT1G23950.2	76	76
AT1G23950.3	76	76
AT1G23950.4	94.93	96.32
AT1G23950.5	100	100
AT1G23960.1	100	98.59
AT1G23960.2	100	98.59
AT1G23970.1	42.86	47.37
AT1G23970.2	0	0
AT1G24050.1	97.22	97.9
AT1G24100.1	42.86	38.46
AT1G24120.1	40	43.75
AT1G24150.1	100	100
AT1G24160.1	76.54	79.49
AT1G24160.2	100	100
AT1G24170.1	50	51.35
AT1G24180.1	57.83	59.26
AT1G24190.1	100	100
AT1G24190.2	100	100
AT1G24240.1	50	46.67
AT1G24267.1	41.27	43.33
AT1G24267.2	41.27	43.33
AT1G24280.1	53.73	57.14
AT1G24300.1	100	97.96
AT1G24300.2	100	97.96
AT1G24310.1	43.66	42.47
AT1G24350.1	85.88	86.36
AT1G24350.2	99.15	99.15
AT1G24350.3	100	100
AT1G24360.1	69.7	68.66
AT1G24450.1	82.61	83.82
AT1G24460.1	81.52	80.43
AT1G24460.2	100	100
AT1G24490.1	79.41	77.88
AT1G24490.2	79.41	77.88
AT1G24510.1	34.92	37.29
AT1G24510.2	34.92	37.29
AT1G24560.1	69.23	69.23
AT1G24575.1	75.38	80.33
AT1G24600.1	76.32	74.36
AT1G24620.1	69.05	65.91
AT1G24625.1	65.85	65.85
AT1G24706.1	59.8	55.45
AT1G24706.2	21.78	20.18
AT1G24764.1	25.62	26.45
AT1G24793.1	35.62	37.14
AT1G24793.2	73.33	74.58
AT1G24800.1	63.46	62.26
AT1G24880.1	94.74	93.1
AT1G24880.2	53.19	50
AT1G24880.3	35.48	34.38
AT1G24881.1	40.35	43.4
AT1G24909.1	85.59	87.83
AT1G25054.1	23.75	24.36
AT1G25054.2	100	100
AT1G25055.1	63.46	62.26
AT1G25083.1	100	100
AT1G25145.1	22.78	23.38
AT1G25150.1	80.77	79.25
AT1G25155.1	85.59	87.83
AT1G25210.1	98.72	98.72
AT1G25210.2	27.61	28.46
AT1G25211.1	64.84	64.84
AT1G25220.1	63.03	66.96
AT1G25220.2	66.84	69.31
AT1G25230.1	100	100
AT1G25250.1	100	100
AT1G25260.1	100	100
AT1G25275.1	83.08	80.6
AT1G25275.2	79.63	76.79
AT1G25275.3	83.08	80.6
AT1G25280.1	100	100
AT1G25280.2	100	100
AT1G25350.1	59.09	54.17
AT1G25350.2	50	45.45
AT1G25370.1	100	100
AT1G25380.1	48	41.38
AT1G25400.1	61.74	64.55
AT1G25400.2	61.74	64.55
AT1G25420.1	17.5	17.28
AT1G25420.2	17.95	17.28
AT1G25420.3	17.95	17.28
AT1G25422.1	100	100
AT1G25490.1	36.21	37.5
AT1G25510.1	95.08	95.08
AT1G25520.1	30.3	28.85
AT1G25530.1	97.7	98.84
AT1G25540.1	23.71	23
AT1G25540.2	23.71	23
AT1G25550.1	94.23	96.08
AT1G25560.1	67.12	71.01
AT1G25570.1	14.41	15.45
AT1G25580.1	38.95	37.76
AT1G25682.1	69.33	71.23
AT1G26110.1	96.74	98.89
AT1G26110.2	96.74	98.89
AT1G26150.1	100	100
AT1G26250.1	72.6	73.61
AT1G26260.1	64.71	66.67
AT1G26260.2	64.71	66.67
AT1G26260.3	64.71	66.67
AT1G26270.1	45.45	47.62
AT1G26300.1	90.91	83.33
AT1G26300.2	100	100
AT1G26340.1	82.89	82.89
AT1G26440.1	71.43	71.43
AT1G26440.2	71.43	71.43
AT1G26440.3	71.43	71.43
AT1G26440.4	71.43	71.43
AT1G26450.1	97.92	97.92
AT1G26460.1	22.55	20.72
AT1G26470.1	62.69	60.87
AT1G26520.1	24.14	24.56
AT1G26550.1	14.93	14.49
AT1G26580.1	87.78	82.29
AT1G26630.1	26.67	25.81
AT1G26630.2	86.29	85.6
AT1G26640.1	94.12	100
AT1G26660.1	98.53	98.53
AT1G26660.2	100	100
AT1G26665.1	35.14	35.14
AT1G26665.2	35.14	35.14
AT1G26670.1	69.57	66.67
AT1G26690.1	63.83	69.77
AT1G26740.1	67.02	68.48
AT1G26750.1	82.54	83.87
AT1G26760.1	45.83	44
AT1G26800.1	38.36	38.1
AT1G26830.1	100	100
AT1G26850.1	100	100
AT1G26850.2	100	100
AT1G26850.3	66.45	64.33
AT1G26880.1	53.01	59.46
AT1G26880.2	75.54	78.95
AT1G26910.1	80.43	80.43
AT1G26920.1	95.51	88.54
AT1G26930.1	100	100
AT1G26940.1	84.62	84.62
AT1G26960.1	97.18	94.52
AT1G27000.1	94.85	93.88
AT1G27020.1	89.47	88.54
AT1G27030.1	62.11	60.82
AT1G27050.1	56.25	58.06
AT1G27090.1	100	100
AT1G27100.1	73.15	76.76
AT1G27130.1	100	100
AT1G27150.1	94.59	94.59
AT1G27190.1	23.38	21.69
AT1G27210.1	47.42	48.94
AT1G27290.1	25.69	26.67
AT1G27290.2	49.04	49.04
AT1G27300.1	69.23	63.16
AT1G27310.1	100	100
AT1G27320.1	24.65	24.82
AT1G27330.1	0	0
AT1G27340.1	98.68	98.68
AT1G27350.1	100	94.23
AT1G27380.2	100	100
AT1G27390.1	56.45	57.85
AT1G27400.1	41.54	41.54
AT1G27430.1	24.39	23.81
AT1G27435.1	84.25	85.6
AT1G27450.1	63.64	63.64
AT1G27450.2	70.71	70.71
AT1G27450.3	54.88	58.44
AT1G27470.1	96.34	95.18
AT1G27510.1	88.14	83.87
AT1G27520.1	48.91	50.56
AT1G27530.1	94	95.92
AT1G27565.1	71.64	66.67
AT1G27600.1	87.39	87.39
AT1G27600.2	100	100
AT1G27620.1	100	100
AT1G27630.1	33.33	33.59
AT1G27650.1	30.21	29.29
AT1G27650.2	30.21	29.29
AT1G27670.1	79.17	82.61
AT1G27695.1	100	100
AT1G27695.2	100	100
AT1G27700.1	0	0
AT1G27730.1	72.92	76.09
AT1G27752.1	34.15	31.11
AT1G27752.2	91.55	89.04
AT1G27760.1	25.77	28.41
AT1G27760.2	100	100
AT1G27760.3	25.77	28.41
AT1G27770.1	29.89	29.55
AT1G27770.2	29.89	29.55
AT1G27840.1	26.92	27.45
AT1G27840.2	26.92	27.45
AT1G27840.3	26.92	27.45
AT1G27930.1	100	98.67
AT1G27950.1	0	0
AT1G27970.1	25.97	24.69
AT1G27970.2	100	100
AT1G27980.1	100	100
AT1G28050.1	30.77	31.75
AT1G28060.1	38.46	43.1
AT1G28090.3	93.62	91.67
AT1G28100.3	100	96.43
AT1G28110.1	92.86	93.81
AT1G28120.1	98.85	97.73
AT1G28130.1	100	100
AT1G28130.2	100	100
AT1G28140.1	90.67	97.14
AT1G28150.1	95.16	96.72
AT1G28190.1	100	100
AT1G28200.1	100	100
AT1G28240.1	57.89	55.93
AT1G28250.1	59.48	57.98
AT1G28280.1	56.63	57.81
AT1G28280.2	100	100
AT1G28290.1	48.33	47.54
AT1G28290.2	48.33	47.54
AT1G28320.1	50.94	49.09
AT1G28330.1	98.29	99.14
AT1G28330.2	68.38	65.49
AT1G28330.3	47.85	45.64
AT1G28330.5	100	100
AT1G28340.1	58.33	59.57
AT1G28350.1	63.77	60.27
AT1G28370.1	77.46	78.57
AT1G28380.1	100	97.7
AT1G28390.1	40.43	40.43
AT1G28390.2	100	100
AT1G28395.1	90.24	90.24
AT1G28395.2	2.68	2.75
AT1G28395.3	32.08	31.48
AT1G28395.4	41.48	42.42
AT1G28395.5	40.23	42.68
AT1G28400.1	77.36	77.36
AT1G28410.1	81.25	81.25
AT1G28420.1	100	100
AT1G28440.1	98.81	98.81
AT1G28480.1	74.55	78.85
AT1G28490.1	100	100
AT1G28490.2	100	100
AT1G28510.1	94.02	92.44
AT1G28520.1	43.68	46.34
AT1G28520.2	46.53	47
AT1G28540.1	54.32	55
AT1G28580.1	55.42	54.76
AT1G28580.2	55.42	54.76
AT1G28680.1	91.3	91.3
AT1G28960.1	77.71	78.03
AT1G28960.2	71.53	70.5
AT1G28960.3	80.15	80.15
AT1G28960.4	90.76	92.31
AT1G28960.5	83.22	84.89
AT1G29025.1	80	85.71
AT1G29030.1	77.27	73.91
AT1G29040.1	70.39	69.03
AT1G29040.2	83.93	85.45
AT1G29040.3	72.73	75
AT1G29040.4	49.81	48.35
AT1G29050.1	82.61	88.37
AT1G29060.1	97.01	95.59
AT1G29150.1	98.55	97.14
AT1G29220.1	100	100
AT1G29220.2	100	100
AT1G29250.1	40	44.9
AT1G29260.1	74.77	76.85
AT1G29270.1	100	100
AT1G29300.1	27.62	27.88
AT1G29310.1	100	96.08
AT1G29320.1	100	90.91
AT1G29330.1	75.23	75.93
AT1G29340.1	71.01	67.12
AT1G29350.1	91.67	95.65
AT1G29370.1	89.06	95
AT1G29380.1	95.7	92.71
AT1G29400.1	97.46	96.64
AT1G29400.2	97.46	96.64
AT1G29418.1	44.19	41.3
AT1G29470.1	23.21	21.67
AT1G29470.2	23.21	21.67
AT1G29520.1	57.14	54.05
AT1G29550.1	51.52	51.52
AT1G29560.1	100	100
AT1G29560.2	100	100
AT1G29760.1	100	100
AT1G29790.1	92.03	93.38
AT1G29790.2	34.81	36.67
AT1G29810.1	85.33	86.49
AT1G29820.1	70.59	70.59
AT1G29820.2	70.59	70.59
AT1G29850.1	82.08	82.08
AT1G29850.2	82.08	82.08
AT1G29850.3	64.2	61.18
AT1G29880.1	56.36	57.41
AT1G29890.1	100	100
AT1G29890.2	100	100
AT1G29900.1	7.32	8.11
AT1G29910.1	96.55	100
AT1G29920.1	97.37	97.37
AT1G29930.1	83.93	85.45
AT1G29940.1	20	22.03
AT1G29950.1	99.14	99.14
AT1G29950.2	98.95	98.95
AT1G29951.1	27.14	27.1
AT1G29952.1	63.34	63.5
AT1G29965.1	12.5	12.77
AT1G29970.1	70.93	75.31
AT1G29970.2	37.5	35.29
AT1G29970.3	70.93	75.31
AT1G29980.1	48.65	43.9
AT1G29980.2	37.84	34.15
AT1G29990.1	90.7	92.86
AT1G30000.1	57.84	59
AT1G30070.1	86.57	84.06
AT1G30090.1	100	100
AT1G30110.1	62.67	64.38
AT1G30110.2	94.12	100
AT1G30120.1	100	100
AT1G30130.1	23.36	24.75
AT1G30130.2	56.14	55.17
AT1G30200.1	73.24	74.29
AT1G30200.2	13.89	13.16
AT1G30230.1	42.86	42.31
AT1G30230.2	15.69	17.02
AT1G30270.1	76.19	80.67
AT1G30320.1	94.59	94.59
AT1G30330.1	50	51.04
AT1G30330.2	50	51.04
AT1G30360.1	79.31	77.97
AT1G30400.1	39.66	40
AT1G30400.2	100	100
AT1G30440.1	96.77	96.77
AT1G30450.1	68.89	69.66
AT1G30450.2	88.35	91
AT1G30450.3	25.53	24
AT1G30460.1	88.78	89.23
AT1G30470.1	7.69	7.04
AT1G30470.2	81.82	79.75
AT1G30470.3	81.82	79.75
AT1G30480.1	89.8	89.8
AT1G30490.1	31.43	33.33
AT1G30510.1	73.68	75
AT1G30510.2	64.91	66.07
AT1G30510.3	73.68	75
AT1G30580.1	50	46.59
AT1G30620.1	100	100
AT1G30620.2	81.11	82.02
AT1G30620.3	100	100
AT1G30630.1	100	100
AT1G30650.1	86.92	85.32
AT1G30690.1	97.14	95.77
AT1G30690.2	97.4	96.15
AT1G30700.1	100	100
AT1G30720.1	81.58	86.11
AT1G30730.1	0	0
AT1G30750.1	97.37	100
AT1G30755.1	73.58	70.91
AT1G30760.1	93.75	94.94
AT1G30810.2	100	100
AT1G30820.1	100	100
AT1G30840.1	100	100
AT1G30840.2	0	0
AT1G30880.1	8	8.16
AT1G30910.1	65.62	61.76
AT1G30970.1	88.35	86.67
AT1G30970.2	84.16	80.95
AT1G31050.1	29.63	30.77
AT1G31070.1	29.84	29.26
AT1G31070.2	100	100
AT1G31120.1	100	100
AT1G31130.1	100	100
AT1G31150.1	65.38	64.15
AT1G31170.1	100	100
AT1G31170.2	100	100
AT1G31170.3	100	100
AT1G31180.1	100	100
AT1G31230.1	61.11	61.11
AT1G31280.1	39.19	36.25
AT1G31320.1	99.14	98.29
AT1G31330.1	100	100
AT1G31335.1	100	100
AT1G31340.1	83.56	79.22
AT1G31350.1	100	100
AT1G31360.1	100	100
AT1G31360.2	100	100
AT1G31420.1	25.47	24.55
AT1G31420.2	5.22	5.08
AT1G31440.1	100	100
AT1G31600.1	56.43	56.43
AT1G31600.2	56.43	56.43
AT1G31600.3	56.43	56.43
AT1G31660.1	37.5	35.06
AT1G31710.1	100	100
AT1G31730.1	86.21	80.65
AT1G31770.1	99.1	99.1
AT1G31780.1	72.97	69.23
AT1G31810.1	49.02	48.54
AT1G31812.1	67.5	66.67
AT1G31817.1	100	100
AT1G31850.1	90.91	91.95
AT1G31850.2	90.91	91.95
AT1G31850.3	90.91	91.95
AT1G31860.1	97.78	97.78
AT1G31870.1	49.44	47.83
AT1G31870.2	49.44	47.83
AT1G31910.1	100	98.15
AT1G31910.2	57.75	58.16
AT1G31930.1	11.76	11.94
AT1G31930.2	11.76	11.94
AT1G31930.3	98.67	98.67
AT1G31940.1	85.71	88.24
AT1G31970.1	80.7	77.97
AT1G32050.1	76.42	79.41
AT1G32070.2	58.18	58.18
AT1G32090.1	84.29	86.76
AT1G32100.1	0	0
AT1G32130.1	42.17	41.18
AT1G32130.2	98.94	98.94
AT1G32150.1	19.35	18.75
AT1G32170.1	100	100
AT1G32190.1	100	100
AT1G32190.2	100	100
AT1G32210.1	100	100
AT1G32230.1	66.04	66.04
AT1G32230.2	66.04	66.04
AT1G32230.3	49.01	45.96
AT1G32240.1	100	100
AT1G32260.1	100	100
AT1G32340.1	42.22	41.3
AT1G32360.1	100	100
AT1G32400.1	65.88	62.92
AT1G32400.2	65.88	62.92
AT1G32400.3	65.88	62.92
AT1G32410.1	5.81	5.81
AT1G32410.2	39.08	39.53
AT1G32410.3	39.08	39.53
AT1G32410.4	39.08	39.53
AT1G32410.5	5.62	5.81
AT1G32440.1	100	100
AT1G32450.1	28.07	29.63
AT1G32460.1	100	100
AT1G32490.1	87.88	89.69
AT1G32490.2	9.38	9.89
AT1G32500.1	54.02	51.65
AT1G32530.1	50	49.25
AT1G32580.1	100	98.55
AT1G32630.1	70	67.74
AT1G32640.1	96.1	94.87
AT1G32700.1	8.89	8.42
AT1G32700.2	8.89	8.42
AT1G32750.1	89.47	89.47
AT1G32760.1	31.03	36
AT1G32790.1	75	78.26
AT1G32790.2	26.96	26.5
AT1G32870.1	100	100
AT1G32870.2	100	100
AT1G32920.1	96.3	94.55
AT1G32990.1	31.25	32.61
AT1G33040.1	100	100
AT1G33050.1	33.98	37.23
AT1G33050.2	86.76	88.06
AT1G33050.3	34.59	34.22
AT1G33050.4	78.64	85.26
AT1G33060.1	74	78.72
AT1G33060.2	100	100
AT1G33110.1	73.13	71.01
AT1G33120.1	32.99	35.56
AT1G33140.1	50	52.56
AT1G33170.1	33.33	32.56
AT1G33230.1	77.01	77.91
AT1G33240.1	57.55	55.45
AT1G33250.1	63.22	67.07
AT1G33265.1	79.52	81.48
AT1G33290.1	100	100
AT1G33290.2	100	100
AT1G33360.1	100	100
AT1G33390.1	31.33	31.71
AT1G33410.1	82.46	81.03
AT1G33410.2	82.46	81.03
AT1G33470.1	45.07	45.8
AT1G33470.2	45.07	45.8
AT1G33480.1	86.36	97.44
AT1G33490.1	100	98.78
AT1G33520.1	45.79	45.79
AT1G33590.1	62.71	58.73
AT1G33680.1	91.27	87.12
AT1G33700.1	95.18	95.18
AT1G33700.2	95.18	95.18
AT1G33750.1	35.29	32.43
AT1G33780.1	84.51	84.51
AT1G33790.1	100	100
AT1G33790.2	100	100
AT1G33800.1	89.53	89.53
AT1G33810.1	91.38	91.38
AT1G33970.1	100	100
AT1G33970.2	100	100
AT1G33970.3	58.04	55.7
AT1G33970.4	100	100
AT1G33970.5	100	100
AT1G33980.1	50.28	51.7
AT1G33980.2	50.28	51.7
AT1G33990.1	100	94.29
AT1G34010.1	70.24	70.24
AT1G34020.1	100	100
AT1G34030.1	22.39	22.06
AT1G34130.1	66.2	65.75
AT1G34150.1	72.63	75.82
AT1G34160.1	100	100
AT1G34190.1	71.79	70
AT1G34220.1	74.71	73.03
AT1G34220.2	74.71	73.03
AT1G34300.1	100	100
AT1G34320.1	42.72	42.72
AT1G34360.1	81.82	80
AT1G34370.1	77.5	75.61
AT1G34370.2	77.5	75.61
AT1G34370.3	71.88	74.19
AT1G34430.1	4.76	5.19
AT1G34550.1	95.2	95.2
AT1G34750.1	93.62	92.63
AT1G34760.1	47.62	48.39
AT1G34760.2	100	100
AT1G35160.1	98.59	98.59
AT1G35160.2	58.49	58.49
AT1G35190.1	92.59	93.75
AT1G35190.2	92.59	93.75
AT1G35260.1	100	100
AT1G35320.1	87.07	87.97
AT1G35430.1	100	100
AT1G35460.1	100	100
AT1G35470.1	20.34	21.82
AT1G35470.2	100	100
AT1G35580.1	28.57	27.16
AT1G35580.2	28.57	27.16
AT1G35580.3	100	100
AT1G35620.1	100	100
AT1G35670.1	100	100
AT1G35680.1	75.51	74
AT1G35720.1	90.12	87.95
AT1G35780.1	83.93	81.03
AT1G36050.2	22.73	23.81
AT1G36060.1	92.96	100
AT1G36160.1	88.16	88.16
AT1G36160.2	88.16	88.16
AT1G36280.1	100	100
[truncated: 13,062 more rows]
