# Supplementary material
Source: HighWire-hosted journal article supplement (doi:10.1101/rna.072850.119)
Supplement: Supplemental_Material_Outline.docx [file Supplemental_Material_Outline.docx]

**Supplemental Information**

**Supplemental Figures, S1-S16**

**Supplemental Figure S1:** Replicate Repeatability Correlations

**Supplemental Figure S2:** Salt Stress Induced Average Mean Reactivity Changes

**Supplemental Figure S3:** The Effect of Salt Stress on Intra-Tissue Transcript Reactivity Gini Index

**Supplemental Figure S4:** The Shoot Structurome is More Reactive than the Root Structurome

**Supplemental Figure S5:** The Effect of Salt Stress on Inter-Tissue Transcript Reactivity Gini Index

**Supplemental Figure S6:** The Effect of Salt Stress on Arabidopsis Transcript Mean Reactivity via ANOVA

**Supplemental Figure S7:** Change in DMS Reactivity is Inversely Correlated with Change in Abundance and the Correlation is Enhanced by Concordancy, Root

**Supplemental Figure S8:** Shoot Region Δ Reactivity Correlations, Concordant vs. Discordant

**Supplemental Figure S9:** Root Region Δ Reactivity Correlations, Concordant vs. Discordant

**Supplemental Figure S10:** Relationship between Reactivity and Abundance with No Contrasts

**Supplemental Figure S11:** Relationship between Reactivity and Abundance and its Modulation by Salt Stress, Extended

**Supplemental Figure S12:** Downscaling of Reverse Transcriptase Stops does not Greatly Alter Transcript Mean Reactivity

**Supplemental Figure S13:** Gene Ontology Analyses Reveal Enrichment of Stress-related Transcripts

**Supplemental Figure S14:** Extended Confirmation of Delta Reactivity Versus Delta Abundance Relationships

**Supplemental Figure S15:** Transcripts Lacking m6A Modification show the Inverse Relationship between Change in Reactivity and Change in Abundance

**Supplemental Figure S16:** Gel-based Assay for Single Hit Kinetics Determination

**Supplemental Data 1:** Processed Data for Contrasted Structuromes, Tables D1-D24 (.xls)

**Table D0:** Index of Data Tables

**Tables D1-D4:** Shoot Control vs. Shoot Salt Intra-Tissue Contrast Derived Statistics

**Tables D5-D8:** Root Control vs. Root Salt Intra-Tissue Contrast Derived Statistics

**Tables D9-D12:** Shoot Control vs. Root Control Inter-Tissue Contrast Derived Statistics

**Tables D13-D16:** Shoot Salt vs. Root Salt Inter-Tissue Contrast Derived Statistics

**Tables D17-D20:** Combined ANOVA

**Tables D21-D24:** Transcript Abundance (TPM)

**Supplemental Data 2:** Processed Data for Individual Structuromes, Tables R1-R17 (.xls)

**Table R0:** Index of Raw Structurome Tables

**Tables R1-R4:** Whole Transcript Derived Reactivity Statistics

**Tables R5-R8:** 5’UTR Derived Reactivity Statistics

**Tables R9-R12:** CDS Derived Reactivity Statistics

**Tables R13-R16:** 3’UTR Derived Reactivity Statistics

**Table R17:** Shoot Control Downscaled, All

**Supplemental Data 3:** Supplemental and Extended Tables, Tables S1-S8 (.xls)

**Table S0:** Index of Supplemental Tables

**Table S1:** Reactivity Metrics and Statistical Tests

**S1A** - Mean Reactivity

**S1B -** Abundance Correlations log2(TPM)

**S1C -**  Gini Reactivity

**Table S2:** Solute Quantification

**S2A** - Proline Content (mg/g dry weight)

**S2B** - Other Solutes (mg/g dry weight)

**S2C** - Solutes Summary

**S2D** - Solute t-tests

**Table S3:** Solute Concentration ANOVAs

**Table S4:** Reactivity ANOVAs

**Table S5:** Tissue Specific Comparisons

**S5A** - Tissue Specific Comparisons, Inherit from Transcript

**S5B** - Tissue Specific Comparisons, Directly Compared

**Table S6:** Abundance Change Relationships

**S6A** - ∆ Mean Reactvity vs. ∆ Abundance

**S6B** - Shared vs. Tissue Specific Transcripts, ∆ Mean Reactivity vs. ∆ Abundance

**S6C** - ∆ Mean Reactvity vs. ∆ Mean Reactvity by Region

**S6D** - ∆ Mean Reactvity vs. ∆ Abundance by Region, Fully Concordant

**S6E** - ∆ Mean Reactvity vs. ∆ Abundance by Region with Concordance

**Table S7:** Concordant Transcripts

**Table S8:**  Abundance Relationships

**S8A** - Mean Reactivity vs. Transcript Abundance, Individual Structuromes

**S8B** - Mean Reactivity vs. Transcript Abundance, Contrasted Structuromes

**S8C** - Categorical Change vs. Control Mean Transcript Abundance log2 (TPM)

**S8D** - Downscale Analysis in Shoot Control

**Supplemental Data 4:** GO analysis results, Tables G1-G40 (.xls)

**Table G0:** Index of GO analyses

**Tables G1-G8:** Shoot Control vs. Shoot Salt GO Analyses

**Tables G9-G16:** Root Control vs. Root Salt GO Analyses

**Tables G17-G24:** Shoot Control vs. Root Control GO Analyses

**Tables G25-G32**: Shoot Salt vs. Root Salt GO Analyses

**Tables G33-G36:** Concordant GO Analyses

**Tables G37-G40:** PPV GO Analyses

**Supplemental Data 5:** Folding PPV Data, Tables F1-F8 (.xls)

**Table F0:** Index of Folding

**Tables F1-F4:** Shoot Control vs. Shoot Salt PPV Analyses

**Tables F5-F8:** Root Control vs. Root Salt PPV Analyses

**Supplemental Data 6:** Bioinformatic Workflow Summary and Logs, Tables W1-W4 (.xls)

**Table W0:** Index of Workflow Tables

**Table W1:** Removing adapters and trimming reads

**Table W2:** Read mapping

**Table W3:** Filtering mappings

**Table W4:** Library specificity
